# Supplementary material for: Sex differences in BNST signaling and BNST CRF in fear processing
Source: eLife. 2025 Dec 5;12:RP89189. doi: 10.7554/eLife.89189 (PMC12680374; doi:10.7554/eLife.89189)
Supplement: Figure 1—source data 1. [file elife-89189-fig1-data1.xlsx]

## Sheet: 1b
	CTRL- Males													CTRL Females													Part- Males													Part- Females
BL	14.4074	52.463	12.8889	9.48148	10.9259	1.35185	1.92593	1	0.314815	0.333333	0.703704	0.222222		0.259259	1.2037	0.722222	0.185185	0	0.166667	0	1.53704	6.62963	9.03704	9.74074	6.7037		8.96296	14.8704	8.88889	9.12963	0.092593	1.25926	0.574074	1.64815	2.12963	0	1.83333	0.111111		2.25926	5.98148	3.88889	0.148148	0.055556	0	0.240741	0	9.46296	4.98148
Tone 1	9.25926	32.0988	32.0988	5.67901	2.46914	5.06173	7.40741	7.77778	0.493827	0	5.55556	2.96296		0	4.32099	1.60494	0.617284	4.44444	6.79012	0.740741	0	17.4074	24.1975	7.53086	12.3457		14.321	8.39506	14.8148	9.1358	3.45679	0	1.97531	0.617284	15.9259	0	1.85185	0		2.83951	6.17284	7.03704	1.23457	7.77778	0	2.96296	0	14.5679	18.7654
Tone 2	2.14286	22.6191	23.5714	15.9524	16.9048	0	2.14286	6.42857	6.07143	0	3.45238	0		2.14286	4.88095	0	1.42857	0	1.07143	0	0	19.2857	11.0714	12.9762	10.2381		15.119	5.83333	19.1667	27.7381	3.92857	17.2619	35.1191	44.1667	26.6667	11.5476	14.1667	8.69048		16.0714	12.2619	4.52381	2.97619	34.8809	0.833333	7.38095	0	10.5952	17.2619
Tone 3	2.14286	15	35.8333	25.4762	11.5476	1.54762	1.78571	9.16667	2.02381	0	21.0714	0		1.30952	10.5952	0.714286	1.07143	0.357143	11.9048	3.21429	0	19.7619	14.5238	7.7381	6.07143		42.0238	12.5	40.5952	50.9524	36.5476	67.9762	59.0476	69.0476	56.1905	5.59524	70	19.6429		29.0476	21.5476	24.0476	5.47619	72.8571	14.0476	40.1191	14.5238	34.2857	34.6429
Tone 4	15.2381	10.5952	38.5714	7.2619	6.30952	0	0	8.45238	0	0	3.57143	3.45238		1.78571	0	1.07143	0	0	6.19048	9.88095	1.42857	0	4.7619	32.7381	5.95238		38.9286	33.8095	37.8571	65.1191	14.2857	82.0238	51.3095	85.7143	28.0952	22.7381	33.2143	47.8571		52.2619	10	42.6191	25.3571	93.5714	12.1429	45.9524	38.4524	52.9762	26.7857
Tone 5	7.14286	7.7381	14.6429	12.381	1.90476	0	7.5	9.40476	2.85714	0.47619	3.21429	1.90476		0	0	2.26191	0	0	1.30952	0	0	1.90476	6.30952	4.40476	5.47619		67.7381	67.6191	80.1191	93.5714	62.6191	16.0714	50.3571	70.3571	60.5952	32.9762	61.3095	46.0714		36.1905	30.8333	63.6905	20.4762	41.5476	41.5476	61.1905	47.0238	72.6191	58.4524
Tone 6	11.6667	41.0714	11.6667	4.52381	4.64286	1.54762	0	4.52381	14.7619	1.30952	0	2.85714		0.833333	0	1.19048	0.952381	0	0	0	0.714286	16.9048	17.9762	7.85714	4.28571		69.8809	80.3571	85.3571	94.0476	76.4286	17.3809	78.0952	95.4762	40.5952	46.1905	63.6905	43.5714		67.8571	34.5238	68.6905	43.8095	100.119	54.0476	61.7857	50.4762	53.3333	83.2143
	Full- Males													Full- Females
BL	6.42593	10.2778	6.24074	0.981481	6.22222	0.685185	0.37037	0.592593	1.94444	1.22222	0	1.75926		0.518519	0.574074	0.333333	1.5	0	0.055556	0.148148	1.5	3.18519	4.38889	1.83333	1.44444
Tone 1	5.92593	20.9876	2.59259	0	28.0247	2.22222	9.87654	0.37037	9.62963	2.34568	5.18518	27.284		3.58025	2.96296	0	0	0	1.72839	0.987654	16.7901	20.2469	12.963	0	2.59259
Tone 2	0	41.4286	16.7857	5.59524	5.2381	38.3333	43.6905	11.6667	56.3095	13.5714	23.2143	57.2619		16.3095	25.5952	1.19048	0	0	3.33333	2.73809	42.5	20.3571	19.4048	33.9286	39.0476
Tone 3	40	18.4524	33.4524	15.8333	69.1667	45.8333	30.7143	37.3809	37.7381	63.0952	11.0714	71.5476		56.1905	44.0476	21.1905	13.8095	72.2619	56.0714	19.5238	67.5	72.5	30.1191	43.0952	42.6191
[truncated: 2 more columns]

## Sheet: 1c
	Ctrl													Full													Part
Males	7.9321	21.5204	26.0641	11.879	7.29644	1.35949	3.13933	7.62566	4.36802	0.297619	6.14418	1.86288		13.5321	23.6205	15.3363	5.91058	28.559	23.1741	22.5491	13.2966	28.0362	21.3144	10.5256	41.9768		41.3353	34.7523	46.3183	56.7607	32.8777	33.4524	45.984	60.8965	38.0115	19.8413	40.7055	27.6389
Females	1.01191	3.29953	1.14051	0.678277	0.800265	4.54439	2.306	0.357143	12.5441	13.1401	12.2075	7.39492		25.3601	24.2019	7.46032	4.60317	24.0873	20.3777	7.74985	42.2634	37.7013	20.8289	25.6746	28.0864		34.0447	19.2233	35.1014	16.555	58.459	20.4365	36.5653	25.0794	39.7296	39.8538	49.221	63.4465

## Sheet: 1d
	Full													Part
Males	40	18.4524	33.4524	15.8333	69.1667	45.8333	30.7143	37.3809	37.7381	63.0952	11.0714	71.5476		38.9286	33.8095	37.8571	65.1191	14.2857	82.0238	51.3095	85.7143	28.0952	22.7381	33.2143	47.8571
Females	56.1905	44.0476	21.1905	13.8095	72.2619	56.0714	19.5238	67.5	72.5	30.1191	43.0952	42.6191		52.2619	10	42.6191	25.3571	93.5714	12.1429	45.9524	38.4524	52.9762	26.7857	41.0714	80.4762

## Sheet: 1e
	Tone 3													Tone 4													Tone 5
Males	42.0238	12.5	40.5952	50.9524	36.5476	67.9762	59.0476	69.0476	56.1905	5.59524	70	19.6429		38.9286	33.8095	37.8571	65.1191	14.2857	82.0238	51.3095	85.7143	28.0952	22.7381	33.2143	47.8571		67.7381	67.6191	80.1191	93.5714	62.6191	16.0714	50.3571	70.3571	60.5952	32.9762	61.3095	46.0714
Females	29.0476	21.5476	24.0476	5.47619	72.8571	14.0476	40.1191	14.5238	34.2857	34.6429	55.5952	70.4762		52.2619	10	42.6191	25.3571	93.5714	12.1429	45.9524	38.4524	52.9762	26.7857	41.0714	80.4762		36.1905	30.8333	63.6905	20.4762	41.5476	41.5476	61.1905	47.0238	72.6191	58.4524	82.0238	98.0952

## Sheet: 1f
	Full M													Full F													Part M													Part F
BL	25.537	21.1296	8.33333	10.2778	44.5556	42.1111	3.55556	24.0741	50.9815	70.3704	7.81482	21.2037		14.537	17.9444	21.5185	18.5	12.2037	8.64815	5.94444	23.7963	29.1667	14.3333	31.7222	12.7222		18.037	21.8889	12.7963	8.25926	12.2407	9.07407	11.0741	15.5741	55.4259	28.537	28.3148	16.2222		19.3518	9.05556	16.537	15.1296	36.7593	2.18519	15.1296	5.2963	11.4074	16.1667
Tone 1	65.4321	85.1852	74.0741	61.7284	79.7531	20.8642	44.8148	63.3333	38.1482	90.6173	44.321	87.037		46.4198	58.642	64.4444	14.0741	74.1975	52.8395	39.2593	59.2593	75.4321	66.5432	57.5309	63.7037		21.9753	63.5802	65.9259	70.6173	41.7284	45.8025	40.1235	36.5432	23.4568	30.3704	79.7531	76.0494		62.963	45.4321	86.0494	64.4444	94.321	59.7531	45.1852	48.1482	31.7284	53.5802
Tone 2	53.6905	89.1667	87.3809	31.7857	21.1905	59.4048	44.8809	61.6667	86.9048	20	41.3095	73.3333		67.1429	61.1905	55.3571	54.6429	64.8809	69.0476	59.2857	38.4524	81.5476	81.4286	71.0714	61.0714		58.6905	37.9762	68.4524	85.9524	64.0476	33.2143	62.2619	7.14286	26.5476	51.3095	59.6429	62.0238		31.0714	21.4286	29.5238	51.9048	96.9048	31.0714	49.5238	42.0238	53.4524	50
Tone 3	39.2857	63.9286	69.8809	71.1905	50.1191	39.8809	50.4762	67.1429	24.8809	12.9762	47.7381	83.8095		27.8571	49.0476	59.4048	68.4524	61.0714	75	55.1191	51.5476	37.3809	25	44.1667	65.3571		51.3095	72.9762	61.1905	91.3095	65.7143	38.9286	68.3333	31.6667	20.8333	24.4048	60.3571	27.9762		39.5238	27.7381	19.7619	32.6191	100.119	33.8095	45.2381	58.4524	38.4524	40.8333
Tone 4	22.0238	61.3095	50.4762	43.4524	14.7619	51.7857	38.5714	92.5	41.5476	34.1667	28.4524	59.7619		20.4762	46.7857	65.9524	50	79.4048	39.1667	63.5714	19.8809	57.8571	17.3809	82.6191	84.7619		31.5476	7.97619	60.9524	82.8571	44.5238	15.8333	64.6429	32.9762	52.5	56.6667	49.1667	43.3333		27.1429	17.3809	38.4524	67.0238	90.3571	19.1667	35.4762	11.4286	32.0238	37.0238
Tone 5	64.4048	90.7143	80.5952	44.7619	45.1191	53.2143	67.9762	88.3333	60.9524	48.2143	19.7619	69.8809		22.8571	23.2143	46.3095	22.6191	82.8571	53.0952	25	65.4762	44.5238	43.8095	88.9286	57.2619		40.2381	40.4762	27.0238	46.9048	56.3095	39.1667	61.7857	59.0476	28.5714	30.3571	31.1905	83.6905		39.8809	33.5714	64.5238	54.7619	98.3333	21.7857	43.8095	40	14.5238	14.7619
Tone 6	28.4524	68.6905	83.8095	32.0238	31.7857	44.4048	48.4524	66.7857	18.0952	26.9048	23.3333	30.5952		67.7381	48.5714	29.6429	25.2381	73.9286	45.4762	59.1667	62.9762	10.3571	34.4048	22.5	49.4048		39.5238	27.3809	26.0714	56.6667	21.5476	15.9524	30.2381	22.3809	24.2857	52.8571	47.3809	46.7857		43.4524	16.1905	16.6667	17.2619	96.9048	35.1191	49.7619	14.6429	31.4286	53.6905
[truncated: 26 more columns]

## Sheet: 1G
	Full													Part
Males	25.537	21.1296	8.33333	10.2778	44.5556	42.1111	3.55556	24.0741	50.9815	70.3704	7.81482	21.2037		18.037	21.8889	12.7963	8.25926	12.2407	9.07407	11.0741	15.5741	55.4259	28.537	28.3148	16.2222
Females	14.537	17.9444	21.5185	18.5	12.2037	8.64815	5.94444	23.7963	29.1667	14.3333	31.7222	12.7222		19.3518	9.05556	16.537	15.1296	36.7593	2.18519	15.1296	5.2963	11.4074	16.1667	22.3148	27.6111

## Sheet: 1I
	Full													Part
Males	45.5482	76.4991	74.3695	47.4905	40.4549	44.9258	49.1953	73.2936	45.0882	38.8132	34.1527	67.403		40.5475	41.7277	51.6027	72.3846	48.9785	31.4829	54.5642	31.6262	29.3658	40.9943	54.5819	56.6431
Females	42.0819	47.9086	53.5185	39.1711	72.7234	55.7709	50.2337	49.5988	51.1831	44.7612	61.1361	63.5935		40.6724	26.9569	42.4963	48.0027	96.15667*	33.4509	44.8325	35.7826	33.6016	41.6483	42.1164	58.3039

## Sheet: 1K
	Ctrl													Full													Part
Males	4.91696	4.32393	6.04424	3.91534	4.47604	4.02778	12.7675	3.26499						33.5788	12.5323	46.6093	60.3939	24.6502	24.6972	29.0991	24.2446						45.862	41.9268	18.6809	42.8807	41.9658	48.4759	33.3554	50.754
Females	2.89095	9.78175	19.648	6.17137	6.04497	2.63448	7.00911	1.84965	1.57187	3.40535	1.51602	6.50059		61.1993	23.9756	45.7672	51.3213	12.8954	24.1578	25.6379	32.5118	41.3036	16.0347	29.2078	38.5318		32.9189	40.7518	39.199	55.7863	34.0278	48.944	55.7547	63.1283	29.6987	72.7506	50.0419	36.3926

## Sheet: 1L
	Full													Part
Males	65.4321	85.1852	74.0741	61.7284	79.7531	20.8642	44.8148	63.3333	38.1482	90.6173	44.321	87.037		21.9753	63.5802	65.9259	70.6173	41.7284	45.8025	40.1235	36.5432	23.4568	30.3704	79.7531	76.0494
Females	46.4198	58.642	64.4444	14.0741	74.1975	52.8395	39.2593	59.2593	75.4321	66.5432	57.5309	63.7037		62.963	45.4321	86.0494	64.4444	94.32099*	59.7531	45.1852	48.1482	31.7284	53.5802	55.5556	75.0617

## Sheet: 1M
	Tone 3													Tone 4													Tone 5
Males	42.0238	12.5	40.5952	50.9524	36.5476	67.9762	59.0476	69.0476	56.1905	5.59524	70	19.6429		38.9286	33.8095	37.8571	65.1191	14.2857	82.0238	51.3095	85.7143	28.0952	22.7381	33.2143	47.8571		67.7381	67.6191	80.1191	93.5714	62.6191	16.0714	50.3571	70.3571	60.5952	32.9762	61.3095	46.0714
Females	29.0476	21.5476	24.0476	5.47619	72.8571	14.0476	40.1191	14.5238	34.2857	34.6429	55.5952	70.4762		52.2619	10	42.6191	25.3571	93.5714	12.1429	45.9524	38.4524	52.9762	26.7857	41.0714	80.4762		36.1905	30.8333	63.6905	20.4762	41.5476	41.5476	61.1905	47.0238	72.6191	58.4524	82.0238	98.0952

[truncated: 5 more sheets: 1N, 1O, 1P, 1Q, 1R]
