# Supplementary material for: Sex differences in BNST signaling and BNST CRF in fear processing
Source: eLife. 2025 Dec 5;12:RP89189. doi: 10.7554/eLife.89189 (PMC12680374; doi:10.7554/eLife.89189)
Supplement: Figure 2—source data 1. [file elife-89189-fig2-data1.xlsx]

## Sheet: 2E
Time		Full Fear- Males																						Part Fear- Males, Shock trials
-20.0207		0.110777	0.565401	-0.357165	-0.251925	0.0969179	-0.942075	-0.400166	0.162769	-0.015397	-0.461656	0.182881	0.965413	0.60004	0.175777	-0.0111533	1.18667	-0.872189	0.219087	-0.617656	-0.232317	-0.490554		3*	3*	3*	8*	8*	8*	9*	9*	9*	12*	12*	12*	14*	14*	14*	16*	16*	16*	18*	18*	18*	20*	20*	20*	1*	1*
-19.9705		0.293868	0.658086	-0.218018	-0.182196	0.116911	-0.94868	-0.391289	0.176349	-0.0217766	-0.516543	-0.00266869	1.05661	0.715822	0.210076	0.0243111	1.17384	-0.752162	0.201521	-0.584646	-0.230531	-0.521381		0.173496	0.217801	-0.459875	-0.540885	0.0585804	1.11361	-1.16999	0.0607613	0.249586	1.32358	1.56684	-0.552803	-0.329741	-0.181462	1.49695	-1.02523	-0.0772438	-0.165336	0.27574	2.85441	-0.765019	-0.0901593	-0.518426	-0.433296	0.71129	-0.50802
-19.9203		0.400147	0.780841	-0.0484155	-0.051127	0.114239	-0.968713	-0.385252	0.179201	-0.0289252	-0.598023	-0.137459	1.24246	0.736705	0.204426	0.0312919	1.14562	-0.648759	0.243919	-0.530273	-0.261999	-0.609787		0.136362	0.182691	-0.371749	-0.418316	0.162274	1.18313	-1.18118	-0.00578543	0.233952	1.33009	1.58195	-0.65694	-0.254846	-0.182207	1.47429	-0.972102	-0.411428	-0.323523	0.207876	2.81406	-0.764053	-0.121052	-0.655866	-0.483398	0.740825	-0.56989
-19.8701		0.456227	0.908299	0.102794	0.0249413	0.156971	-0.914884	-0.38258	0.18098	-0.0350935	-0.710819	-0.121091	1.31834	0.743512	0.13337	-0.0106424	1.20324	-0.56699	0.312298	-0.513425	-0.273791	-0.691826		0.138723	0.138284	-0.248383	-0.400391	0.219461	1.13839	-1.22085	-0.0327815	0.181152	1.29675	1.45356	-0.781736	-0.206972	-0.223657	1.40163	-0.906527	-0.696067	-0.479028	0.106928	2.71415	-0.727995	-0.154338	-0.724499	-0.580107	0.622965	-0.62409
-19.82		0.497794	0.968273	0.220674	0.00321311	0.273914	-0.797324	-0.372589	0.185493	-0.0338678	-0.779929	-0.0890703	1.18464	0.818197	-0.0388483	-0.0535138	1.29593	-0.477793	0.33834	-0.523784	-0.201968	-0.701589		0.126708	0.22561	-0.186618	-0.504098	0.250323	1.02782	-1.29129	-0.0115815	0.0966424	1.20199	1.3015	-0.878493	-0.186763	-0.275841	1.3141	-0.714228	-0.629058	-0.559458	0.00435363	2.54731	-0.619805	-0.1151	-0.688022	-0.687468	0.517782	-0.57571
-19.7698		0.527761	0.925042	0.293863	0.00191962	0.383994	-0.716476	-0.348244	0.181481	-0.0386731	-0.76611	-0.150928	1.03142	0.947131	-0.271956	-0.0357137	1.30907	-0.378557	0.319742	-0.532753	-0.0712112	-0.663605		0.0136755	0.399517	-0.223153	-0.607996	0.259258	0.948781	-1.35698	0.00521333	0.0217105	1.08018	1.14508	-0.948104	-0.16715	-0.299436	1.26976	-0.425705	-0.304199	-0.627124	-0.0763789	2.30286	-0.526882	0.0237458	-0.62396	-0.74658	0.497649	-0.36638
-19.7196		0.513846	0.829529	0.303513	0.105734	0.407998	-0.710639	-0.327117	0.161824	-0.0658218	-0.758501	-0.225911	1.06097	1.11196	-0.453769	-0.00367939	1.21995	-0.307681	0.317378	-0.542897	0.0395248	-0.638627		-0.161874	0.41638	-0.28751	-0.589251	0.239785	0.938835	-1.37661	-0.0277866	0.0118766	1.01018	0.933912	-0.959948	-0.132847	-0.297745	1.27295	-0.237154	-0.0730253	-0.730115	-0.158459	1.99822	-0.534651	0.179642	-0.608968	-0.743065	0.507591	-0.07422
-19.6694		0.436408	0.745346	0.279571	0.204766	0.374031	-0.727997	-0.333522	0.138332	-0.0960454	-0.849289	-0.225278	1.19742	1.29585	-0.485238	-0.0835847	1.08644	-0.298741	0.354869	-0.568738	0.0956454	-0.628484		-0.23983	0.18447	-0.271812	-0.505623	0.178709	0.978515	-1.36138	-0.0693692	0.0675956	1.03352	0.676576	-0.828443	-0.091227	-0.290464	1.26801	-0.213455	-0.0864765	-0.870399	-0.241653	1.68937	-0.620213	0.256925	-0.637503	-0.774619	0.494933	0.143846
-19.6193		0.328985	0.662346	0.301274	0.172372	0.346148	-0.737454	-0.356345	0.127274	-0.0955196	-0.973492	-0.19187	1.23131	1.38874	-0.364165	-0.297366	0.945834	-0.330893	0.396697	-0.591976	0.139706	-0.605729		-0.15078	-0.0819912	-0.170388	-0.507704	0.0854037	1.02782	-1.36634	-0.0419852	0.123497	1.11564	0.454151	-0.53159	-0.0561357	-0.266701	1.20971	-0.15138	-0.202362	-1.02975	-0.269383	1.44068	-0.68593	0.213255	-0.69591	-0.940424	0.494125	0.219897
-19.5691		0.242336	0.53169	0.393109	0.081882	0.310906	-0.738749	-0.352351	0.128301	-0.0741795	-0.993788	-0.171859	1.11717	1.29067	-0.211445	-0.494384	0.805842	-0.3416	0.43602	-0.571743	0.242019	-0.597469		-0.0261958	-0.173412	-0.09633	-0.595742	0.0141992	1.03882	-1.41258	0.0457855	0.123698	1.18467	0.325235	-0.181858	-0.0383858	-0.201169	1.1109	0.0817987	-0.289184	-1.12013	-0.212591	1.27387	-0.675827	0.052779	-0.798517	-1.15515	0.548935	0.22957
-19.5189		0.177047	0.3688	0.481611	0.0793364	0.222908	-0.681139	-0.305149	0.126498	-0.0768019	-0.907311	-0.130463	0.972132	1.11481	-0.185057	-0.52767	0.692411	-0.305306	0.521819	-0.509136	0.424113	-0.650694		-0.0231497	-0.145545	-0.129171	-0.612478	0.0108419	0.985251	-1.45527	0.0986346	0.0777355	1.17673	0.276903	0.0968955	-0.0414343	-0.101644	1.01646	0.268816	-0.359647	-1.03681	-0.122204	1.15727	-0.642622	-0.160068	-0.892965	-1.20863	0.61042	0.262767
-19.4687		0.0979759	0.265506	0.512403	0.145291	0.122058	-0.51885	-0.255929	0.111846	-0.111332	-0.836009	-0.0738258	0.876184	1.06004	-0.313813	-0.433101	0.62833	-0.276476	0.66907	-0.463764	0.613882	-0.729528		-0.127973	-0.13179	-0.212898	-0.482494	0.0406006	0.889426	-1.45138	0.073807	0.0305491	1.06166	0.266476	0.305267	-0.0538348	-0.00895627	0.953176	0.150667	-0.412553	-0.862246	-0.0558517	1.0674	-0.672033	-0.309526	-0.863199	-1.05109	0.58165	0.306646
-19.4185		0.0149032	0.279829	0.551761	0.162746	0.0955396	-0.337892	-0.252564	0.0896483	-0.133131	-0.831184	-0.0929732	0.806955	1.08114	-0.452267	-0.354304	0.585127	-0.311098	0.816255	-0.470948	0.686743	-0.738751		-0.221325	-0.102643	-0.249111	-0.311036	0.0254102	0.789225	-1.42458	0.0470175	0.0088926	0.876815	0.264072	0.502779	-0.0566313	0.0486265	0.91046	-0.152655	-0.412046	-0.846616	-0.00978153	1.03191	-0.742908	-0.322098	-0.714204	-0.881321	0.454974	0.302294
-19.3684		-0.012935	0.350706	0.696939	0.136368	0.125918	-0.270113	-0.285425	0.0714689	-0.112998	-0.830546	-0.214864	0.711525	0.952286	-0.468289	-0.335307	0.520981	-0.369063	0.908773	-0.47801	0.578722	-0.658325		-0.254647	0.00147794	-0.222639	-0.203524	-0.0382849	0.701896	-1.42909	0.0930671	0.0111545	0.726909	0.243847	0.670901	-0.0496153	0.083117	0.855864	-0.316966	-0.444895	-1.05404	0.0397833	1.06047	-0.73771	-0.223376	-0.61547	-0.875828	0.339846	0.258479
-19.3182		0.0254085	0.364848	0.922946	0.155264	0.0879839	-0.274764	-0.300195	0.0601721	-0.0776561	-0.809829	-0.344691	0.557433	0.678988	-0.422464	-0.294322	0.455238	-0.366738	0.954004	-0.420939	0.353615	-0.574508		-0.25564	0.0740012	-0.181251	-0.113438	-0.0532061	0.648025	-1.47426	0.164031	0.0227109	0.695017	0.178024	0.748212	-0.0595771	0.126048	0.76833	-0.284308	-0.622079	-1.21018	0.0874564	1.07599	-0.62478	-0.0739901	-0.634831	-0.949185	0.325408	0.236999
-19.268		0.0526318	0.292473	1.09758	0.193938	-0.0697606	-0.168564	-0.264655	0.0470666	-0.0636464	-0.828148	-0.412314	0.371093	0.547669	-0.46198	-0.197034	0.444407	-0.313912	0.955568	-0.334337	0.137284	-0.560306		-0.226551	-0.00244451	-0.156575	0.0519677	0.0550048	0.650809	-1.52253	0.156755	0.0261746	0.75465	0.0740603	0.763033	-0.105763	0.188334	0.662819	-0.26639	-0.794612	-1.06688	0.13299	1.00748	-0.529986	0.0837719	-0.57452	-0.88776	0.360881	0.257498
-19.2178		0.0112611	0.205214	1.13541	0.14193	-0.23704	0.0962922	-0.197218	0.0245321	-0.0677893	-0.898354	-0.460271	0.263851	0.692522	-0.588767	-0.132192	0.485023	-0.302548	0.875424	-0.303781	-0.00537398	-0.597974		-0.161022	-0.126487	-0.163177	0.25738	0.222809	0.664598	-1.54772	0.0616593	0.0135951	0.808428	-0.0103461	0.816209	-0.163722	0.248933	0.574287	-0.374112	-0.676753	-0.746358	0.209654	0.92086	-0.554796	0.193126	-0.265193	-0.640458	0.326126	0.289057
-19.1677		-0.029237	0.163393	1.07027	0.0154241	-0.291601	0.339498	-0.135149	-0.00254971	-0.0666791	-0.950354	-0.54267	0.331587	0.900364	-0.669133	-0.162365	0.502991	-0.350221	0.721564	-0.323347	-0.109713	-0.641061		-0.123219	-0.116849	-0.215957	0.366713	0.309457	0.58568	-1.56038	-0.0336054	-0.00492482	0.794309	-0.0343495	0.938352	-0.190577	0.287569	0.513576	-0.528426	-0.30606	-0.533952	0.330271	0.938396	-0.622407	0.193811	0.10497	-0.363565	0.204017	0.316379
-19.1175		0.0596481	0.150226	0.981218	-0.0379444	-0.256992	0.398118	-0.0995558	-0.0254722	-0.0566576	-0.956038	-0.636251	0.509188	0.957581	-0.653688	-0.202167	0.455535	-0.363069	0.593939	-0.301347	-0.238402	-0.682588		-0.189238	0.00388068	-0.293725	0.31759	0.269161	0.405291	-1.57991	-0.0708635	-0.0163568	0.711079	-0.0374167	1.05699	-0.194174	0.319272	0.457145	-0.668833	-0.0384831	-0.489792	0.443043	1.04251	-0.602724	0.113052	0.226322	-0.211087	0.117592	0.346155
-19.0673		0.299152	0.134841	0.911874	0.0361827	-0.233828	0.34587	-0.0897198	-0.0514052	-0.049221	-0.964844	-0.690619	0.64559	0.932694	-0.642072	-0.135166	0.383728	-0.292942	0.560441	-0.221406	-0.392883	-0.73093		-0.323731	0.0633467	-0.343809	0.187935	0.203169	0.263246	-1.60658	-0.0767431	-0.0209057	0.574708	-0.0826208	1.1042	-0.242269	0.377238	0.386784	-0.789081	-0.000761889	-0.485971	0.482027	1.0922	-0.504671	0.0617473	0.151995	-0.182997	0.175575	0.365563
-19.0171		0.565688	0.136302	0.870234	0.120119	-0.234067	0.397712	-0.0886468	-0.0991082	-0.0465087	-0.987338	-0.693606	0.736471	0.977012	-0.707672	0.0164888	0.332217	-0.228804	0.55228	-0.18962	-0.50797	-0.775349		-0.419383	0.0128739	-0.368812	0.0829972	0.213505	0.258622	-1.6225	-0.0915955	-0.0176873	0.412061	-0.157284	1.07721	-0.370382	0.461354	0.314258	-0.834433	0.0714686	-0.489842	0.436713	1.03171	-0.434732	0.095051	0.205578	-0.193394	0.330617	0.364177
-18.967		0.727359	0.186897	0.848345	0.107482	-0.185272	0.664859	-0.0734333	-0.16417	-0.044958	-0.967639	-0.66509	0.918103	1.06597	-0.778887	0.140087	0.275347	-0.266793	0.476527	-0.271167	-0.533658	-0.805821		-0.452585	-0.0505201	-0.440002	0.0230819	0.270189	0.300502	-1.61452	-0.110266	0.00726737	0.273872	-0.207699	0.994205	-0.508707	0.528673	0.25322	-0.798238	0.306239	-0.550352	0.349349	0.943647	-0.429654	0.15899	0.423296	-0.212909	0.431319	0.382252
-18.9168		0.762971	0.272816	0.818554	0.0352216	-0.0757076	1.05332	-0.0389157	-0.205927	-0.0494586	-0.895813	-0.639094	1.19275	1.09539	-0.743099	0.201524	0.175486	-0.368512	0.373432	-0.376406	-0.50481	-0.826682		-0.502318	-0.0975828	-0.5766	-0.0215564	0.285787	0.260167	-1.60262	-0.113626	0.0542074	0.195116	-0.259818	0.864999	-0.554605	0.545306	0.192778	-0.829169	0.40551	-0.586486	0.269366	0.891412	-0.436509	0.223923	0.493768	-0.282529	0.386033	0.4663
-18.8666		0.730278	0.345394	0.755072	-0.0202117	0.0141788	1.37312	-0.00988188	-0.192981	-0.0621299	-0.823883	-0.650334	1.36173	1.0667	-0.597894	0.254094	0.066668	-0.424498	0.344774	-0.391462	-0.500581	-0.837623		-0.610374	-0.204819	-0.68988	-0.0362997	0.261393	0.176759	-1.63398	-0.114174	0.0918257	0.163427	-0.394037	0.713113	-0.508223	0.524786	0.119762	-1.00826	0.120647	-0.458752	0.222198	0.856615	-0.41569	0.37361	0.321635	-0.405102	0.231124	0.587556
-18.8164		0.67637	0.368307	0.685314	-0.0623763	0.0387045	1.5311	-0.0119273	-0.151021	-0.0677417	-0.752942	-0.694652	1.33101	1.02754	-0.459755	0.305271	0.0103702	-0.404902	0.364809	-0.348767	-0.542248	-0.840188		-0.712041	-0.376607	-0.707408	0.0217148	0.264094	0.164337	-1.72066	-0.141217	0.0957161	0.174878	-0.57806	0.571179	-0.474628	0.499846	0.0480651	-1.1374	-0.316162	-0.227938	0.19871	0.842736	-0.377468	0.661943	0.206584	-0.503916	0.059639	0.674108
-18.7662		0.616088	0.336566	0.676411	-0.118108	0.0440311	1.61851	-0.0342748	-0.13367	-0.0527508	-0.634711	-0.727383	1.29015	0.956983	-0.450721	0.297806	-0.0035966	-0.369609	0.299555	-0.363057	-0.581815	-0.857839		-0.725253	-0.507424	-0.677998	0.117984	0.3	0.189161	-1.7988	-0.196068	0.0833226	0.281961	-0.648228	0.450371	-0.52382	0.478835	0.00448485	-1.01408	-0.517248	-0.101264	0.171686	0.885626	-0.348217	0.947953	0.297052	-0.531819	-0.05811	0.714006
-18.7161		0.552709	0.268788	0.734618	-0.152477	0.0602845	1.77897	-0.0436215	-0.147837	-0.031291	-0.498655	-0.740266	1.43364	0.841446	-0.582359	0.227032	-0.0403823	-0.358324	0.112162	-0.443127	-0.597706	-0.899145		-0.647929	-0.554913	-0.682828	0.136266	0.314479	0.116343	-1.7973	-0.241485	0.0813524	0.513325	-0.520771	0.347489	-0.611458	0.452842	-0.00319088	-0.802886	-0.460156	-0.123529	0.133455	0.939149	-0.357737	1.02448	0.314137	-0.553787	-0.08771	0.754662
-18.6659		0.47546	0.190351	0.763507	-0.123118	0.0318928	2.00258	-0.0331065	-0.143828	-0.0275313	-0.439658	-0.78328	1.66051	0.753971	-0.738314	0.158455	-0.121355	-0.345867	-0.0836108	-0.486712	-0.62924	-0.915902		-0.555204	-0.599995	-0.707144	0.0244628	0.291464	-0.0489342	-1.73561	-0.239025	0.0842131	0.769161	-0.316561	0.26337	-0.662075	0.427127	0.0105459	-0.839521	-0.422525	-0.144868	0.0950829	0.901181	-0.421445	0.914258	0.0694657	-0.645017	-0.03494	0.805816
-18.6157		0.362586	0.113593	0.681322	-0.0609637	-0.0822202	2.14398	-0.0305968	-0.0886052	-0.0362632	-0.471116	-0.856436	1.73716	0.730667	-0.788054	0.106916	-0.211291	-0.304132	-0.198529	-0.448573	-0.680445	-0.86517		-0.534967	-0.685105	-0.682978	-0.117971	0.255382	-0.13882	-1.69229	-0.191869	0.0780511	0.886599	-0.195811	0.185272	-0.672219	0.412819	0.0256292	-1.14471	-0.560054	-0.094943	0.0400794	0.776767	-0.496396	0.869433	-0.164934	-0.764082	0.035688	0.819882
-18.5655		0.218917	0.036544	0.544623	-0.0285546	-0.220131	2.15928	-0.0510862	-0.0148605	-0.0309022	-0.535209	-0.864591	1.64416	0.666738	-0.719677	0.0195258	-0.289243	-0.247752	-0.273635	-0.392383	-0.661861	-0.797596		-0.60311	-0.72586	-0.619993	-0.162704	0.213251	-0.0574359	-1.68629	-0.140907	0.0796221	0.82956	-0.16154	0.0886976	-0.688873	0.39317	0.0252085	-1.42642	-0.772704	-0.0583058	-0.0662221	0.671823	-0.507161	1.00842	-0.11898	-0.821103	0.038844	0.777907
-18.5154		0.0877757	-0.0365922	0.473002	-0.0413291	-0.303379	2.1896	-0.0669084	0.0227974	-0.0133129	-0.645594	-0.767024	1.5579	0.475097	-0.625472	-0.0766414	-0.35881	-0.204298	-0.368506	-0.363181	-0.492509	-0.798223		-0.64781	-0.655542	-0.609496	-0.117089	0.194506	0.101206	-1.66702	-0.116177	0.112575	0.746022	-0.122477	-0.0133658	-0.725563	0.332836	0.00175677	-1.51083	-0.896375	-0.0619764	-0.196164	0.618784	-0.448433	1.13353	0.021469	-0.814734	-0.04016	0.725897
-18.4652		0.00165861	-0.0925187	0.46801	-0.0766031	-0.34298	2.33756	-0.0444968	0.0157346	-0.0188525	-0.834728	-0.679201	1.56005	0.27074	-0.572283	-0.0388379	-0.399218	-0.184924	-0.457232	-0.322497	-0.215534	-0.845233		-0.518728	-0.550133	-0.700093	-0.0928959	0.287814	0.204415	-1.62057	-0.108448	0.16205	0.798109	-0.0698731	-0.0776249	-0.749506	0.228829	-0.0329152	-1.48257	-0.867421	-0.0266138	-0.256998	0.571373	-0.405068	1.05037	-0.0211643	-0.79313	-0.12868	0.705257
-18.415		-0.0559692	-0.129227	0.415602	-0.116564	-0.378657	2.49431	0.00381538	-0.000602135	-0.0561706	-0.970228	-0.707764	1.57134	0.235721	-0.555884	0.189817	-0.38628	-0.204429	-0.499919	-0.241986	0.0449777	-0.829091		-0.231484	-0.517398	-0.828565	-0.144818	0.515168	0.239805	-1.59303	-0.0963858	0.185842	0.983442	-0.0671035	-0.118837	-0.739664	0.122285	-0.0552265	-1.42978	-0.750579	0.0346137	-0.209739	0.57043	-0.443047	0.892332	-0.122317	-0.748408	-0.17101	0.70188
-18.3648		-0.119453	-0.153314	0.288985	-0.148955	-0.379509	2.5063	0.0275929	-0.00270324	-0.0810361	-0.857546	-0.778017	1.53703	0.337082	-0.571491	0.44838	-0.360413	-0.287715	-0.525009	-0.163004	0.208782	-0.724995		-0.00110607	-0.532375	-0.89223	-0.221565	0.731968	0.272022	-1.59157	-0.0776235	0.161967	1.17276	-0.0976232	-0.215898	-0.719252	0.0433678	-0.0576686	-1.33861	-0.690705	0.00625676	-0.125532	0.709755	-0.537876	0.906371	-0.00627135	-0.682318	-0.20538	0.685987
-18.3146		-0.195035	-0.156524	0.225516	-0.170298	-0.303685	2.40809	-0.00363931	-0.00370587	-0.0612884	-0.556433	-0.770785	1.48152	0.349936	-0.630991	0.54474	-0.393932	-0.422634	-0.565976	-0.124588	0.277365	-0.634843		0.0156393	-0.479677	-0.861938	-0.262699	0.786882	0.315161	-1.55783	-0.0570565	0.107027	1.285	-0.0454423	-0.383454	-0.721611	-0.0273538	-0.0572288	-1.24831	-0.783235	-0.0915951	-0.0829109	0.90572	-0.627124	1.04377	0.270141	-0.696607	-0.29021	0.656373
-18.2645		-0.267514	-0.128338	0.324466	-0.207495	-0.209001	2.34389	-0.0676515	-0.020241	-0.0320506	-0.355123	-0.734003	1.39623	0.174029	-0.698761	0.499097	-0.485277	-0.541155	-0.588968	-0.111622	0.28755	-0.616076		-0.0827945	-0.319608	-0.807436	-0.266748	0.716461	0.316954	-1.47358	-0.0316042	0.0582122	1.35361	0.15455	-0.522062	-0.738978	-0.11562	-0.0681884	-1.24922	-0.95106	-0.0936546	-0.0761779	0.926208	-0.672498	1.02958	0.463374	-0.851498	-0.39175	0.622031
-18.2143		-0.331619	-0.0921694	0.472557	-0.288053	-0.19611	2.33276	-0.119455	-0.0404573	-0.0409517	-0.375946	-0.776322	1.25936	-0.0329459	-0.709072	0.477967	-0.562816	-0.590468	-0.560587	-0.102835	0.275605	-0.576504		-0.114155	-0.120962	-0.820072	-0.259309	0.644834	0.255416	-1.40396	-0.00919077	0.043764	1.43005	0.423088	-0.557036	-0.72308	-0.196719	-0.0831862	-1.29448	-1.01593	0.029243	-0.0654831	0.728874	-0.663161	0.780495	0.562866	-1.00819	-0.4148	0.57759
-18.1641		-0.390884	-0.0906699	0.49567	-0.387992	-0.261054	2.28089	-0.140327	-0.0413227	-0.0681614	-0.447542	-0.837584	1.15484	-0.088983	-0.670728	0.550046	-0.600653	-0.596239	-0.530708	-0.0983838	0.260701	-0.415048		-0.0728386	0.0485162	-0.915692	-0.253253	0.576055	0.195549	-1.38849	-0.015605	0.0548369	1.49952	0.618919	-0.542175	-0.645339	-0.224628	-0.0933488	-1.23852	-0.91376	0.128239	-0.0472756	0.558429	-0.620625	0.500067	0.693891	-1.00263	-0.33446	0.519028
-18.1139		-0.438642	-0.131084	0.420173	-0.467077	-0.303385	2.19605	-0.146495	-0.0238471	-0.0624743	-0.431506	-0.782115	1.18334	-0.0118782	-0.664127	0.651469	-0.64653	-0.611187	-0.570345	-0.0854629	0.229604	-0.185895		-0.0735759	0.168042	-1.00688	-0.257182	0.45168	0.20976	-1.36741	-0.0570497	0.0466356	1.51831	0.67012	-0.55777	-0.540581	-0.207754	-0.108081	-1.09155	-0.760514	0.174171	-0.0274935	0.601325	-0.597169	0.371096	0.76605	-0.914147	-0.22172	0.4536
-18.0638		-0.467764	-0.180234	0.428965	-0.539815	-0.280864	2.20553	-0.156625	-0.00928044	-0.0396228	-0.416344	-0.658503	1.25935	0.070349	-0.712986	0.74836	-0.713037	-0.633954	-0.667604	-0.0508596	0.159452	-0.0268927		-0.134611	0.207399	-0.972889	-0.291781	0.333364	0.259545	-1.27398	-0.103127	-0.0111795	1.48203	0.606318	-0.592977	-0.46484	-0.20662	-0.13439	-1.02152	-0.688791	0.321891	0.0181805	0.746613	-0.610666	0.368946	0.592599	-0.956265	-0.12407	0.378855
-18.0136		-0.493722	-0.214152	0.572371	-0.632153	-0.268039	2.32823	-0.166409	-0.00484092	-0.0667282	-0.485529	-0.631662	1.19104	0.107178	-0.753287	0.864616	-0.725293	-0.638859	-0.753879	-0.0292994	0.0654886	0.0276864		-0.185046	0.138116	-0.768435	-0.37811	0.33377	0.226368	-1.13785	-0.131911	-0.0884073	1.42431	0.498187	-0.608368	-0.422356	-0.250291	-0.152348	-1.06808	-0.718017	0.593122	0.11101	0.817027	-0.605642	0.386223	0.269777	-1.1443	0.001319	0.283894
-17.9634		-0.541799	-0.235405	0.690071	-0.689657	-0.340883	2.39145	-0.160248	0.00335127	-0.141892	-0.536822	-0.692017	0.973118	0.112625	-0.759427	0.949433	-0.621879	-0.654966	-0.798762	-0.0543635	-0.00998117	0.0610544		-0.209519	0.0332331	-0.46155	-0.507357	0.41156	0.0841656	-1.03486	-0.160236	-0.121655	1.37396	0.395536	-0.633826	-0.375543	-0.302612	-0.14034	-1.0797	-0.818831	0.78023	0.233862	0.834818	-0.543385	0.363068	0.0980334	-1.28094	0.187284	0.18523
-17.9132		-0.61285	-0.24129	0.660452	-0.636294	-0.470955	2.25874	-0.138127	0.0216642	-0.171068	-0.463732	-0.672121	0.804618	0.0627466	-0.802012	0.886873	-0.442963	-0.734621	-0.817343	-0.0677043	-0.0565919	0.120263		-0.22183	0.0445038	-0.157598	-0.627253	0.420672	-0.0388149	-0.979121	-0.202246	-0.0829262	1.32835	0.314683	-0.717268	-0.321099	-0.327847	-0.118799	-1.00382	-0.986697	0.775206	0.356824	0.897035	-0.485779	0.274272	0.152671	-1.25246	0.349372	0.124524
-17.8631		-0.684536	-0.21825	0.568246	-0.520293	-0.568994	2.02536	-0.120202	0.0379288	-0.0983002	-0.318171	-0.541763	0.789111	-0.0569645	-0.920626	0.685321	-0.265277	-0.852678	-0.818712	0.0176268	-0.0945337	0.157944		-0.17049	0.20644	0.0916061	-0.682149	0.337641	-0.0324453	-0.927246	-0.23598	-0.000771382	1.24986	0.258235	-0.839944	-0.299104	-0.342923	-0.135086	-1.00741	-1.16334	0.715644	0.463772	0.975204	-0.510818	0.121134	0.210303	-1.14228	0.357106	0.110146
-17.8129		-0.741476	-0.17784	0.536434	-0.481425	-0.595348	1.88433	-0.125041	0.0458046	0.0108898	-0.17541	-0.452472	0.815072	-0.15699	-1.01591	0.523081	-0.099401	-0.917871	-0.809811	0.16115	-0.116921	0.144201		-0.0289676	0.350801	0.277009	-0.678807	0.268371	0.0335037	-0.863339	-0.246546	0.0755585	1.09397	0.227569	-0.958145	-0.313185	-0.375415	-0.1972	-1.17806	-1.18427	0.696061	0.53523	1.03003	-0.595232	-0.0427729	0.104386	-1.04927	0.198066	0.094595
-17.7627		-0.781956	-0.158294	0.528219	-0.554749	-0.591898	1.87591	-0.149906	0.0557433	0.0630557	-0.0163368	-0.476938	0.781162	-0.138863	-0.953946	0.536867	0.0910109	-0.89196	-0.819128	0.221245	-0.0941812	0.129977		0.103415	0.312103	0.367576	-0.680796	0.247471	0.0143954	-0.822547	-0.264612	0.111043	0.869294	0.217686	-1.07032	-0.298757	-0.409694	-0.253589	-1.31587	-0.944682	0.625763	0.541315	1.15997	-0.667118	-0.156956	-0.0755849	-0.972193	0.00192	0.034792
-17.7125		-0.810761	-0.173678	0.442248	-0.622309	-0.615595	1.88508	-0.174671	0.0710009	0.0561773	0.152362	-0.519488	0.737942	-0.0708671	-0.751145	0.660318	0.308105	-0.82778	-0.856504	0.157039	-0.0396518	0.147384		0.151887	0.152204	0.328941	-0.720527	0.203615	-0.0898921	-0.83486	-0.319296	0.0986751	0.656427	0.218467	-1.17907	-0.204679	-0.412246	-0.257515	-1.21537	-0.580415	0.481795	0.476613	1.42403	-0.720207	-0.216874	-0.170504	-0.898965	-0.11053	-0.05219
-17.6623		-0.854333	-0.19537	0.303271	-0.593785	-0.667164	1.84678	-0.181684	0.077497	0.0519824	0.232615	-0.511732	0.720822	-0.131836	-0.578334	0.73691	0.526686	-0.778832	-0.879396	0.0809256	-0.0109056	0.140329		0.226814	0.067536	0.205305	-0.760719	0.128925	-0.136812	-0.883755	-0.38531	0.0649595	0.527831	0.228129	-1.24746	-0.0681934	-0.380431	-0.226419	-0.986463	-0.340903	0.393225	0.381118	1.65059	-0.784385	-0.240905	-0.157588	-0.859535	-0.1464	-0.11852
-17.6122		-0.952192	-0.199854	0.212077	-0.52741	-0.698382	1.82611	-0.169159	0.0720127	0.0761167	0.192228	-0.508735	0.631558	-0.350175	-0.573181	0.716638	0.760389	-0.739826	-0.85661	0.0722747	-0.0363662	0.0677768		0.465218	0.11779	0.105174	-0.764976	0.114063	-0.0588605	-0.925679	-0.420818	0.0544497	0.462761	0.250273	-1.25238	0.0279921	-0.329445	-0.21197	-0.867883	-0.276434	0.36502	0.308985	1.63717	-0.839689	-0.214381	-0.106981	-0.846869	-0.18299	-0.15014
-17.562		-1.0866	-0.196752	0.169621	-0.523725	-0.680669	1.88034	-0.146853	0.0757295	0.106301	0.138689	-0.559702	0.415762	-0.517301	-0.706952	0.671313	1.0439	-0.69531	-0.830834	0.0639159	-0.088646	-0.00914583		0.805159	0.180257	0.0815719	-0.751412	0.177249	0.0332558	-0.93518	-0.428886	0.0905394	0.38796	0.2745	-1.22426	0.0496539	-0.258977	-0.231191	-0.858134	-0.190429	0.247559	0.290864	1.43482	-0.859306	-0.115986	-0.0457491	-0.805698	-0.24313	-0.17633
-17.5118		-1.15915	-0.187968	0.0979138	-0.592606	-0.639822	1.95071	-0.123942	0.100704	0.129425	0.152416	-0.637172	0.21244	-0.437184	-0.855076	0.665875	1.33977	-0.659962	-0.853106	-0.0203371	-0.132439	-0.0342222		1.09095	0.16577	0.0893584	-0.744355	0.205837	0.00773326	-0.929806	-0.438751	0.156663	0.291464	0.2821	-1.18556	0.0284379	-0.171833	-0.259263	-0.78465	0.0583973	0.0824067	0.332682	1.23829	-0.888555	0.0444645	0.0505746	-0.753092	-0.28546	-0.22386
-17.4616		-1.10403	-0.144207	-0.00255822	-0.677622	-0.612755	1.94956	-0.105549	0.125608	0.15257	0.18642	-0.7119	0.179697	-0.190162	-0.932321	0.685813	1.52898	-0.636611	-0.889777	-0.126299	-0.152113	-0.0685237		1.29763	0.139948	0.0780039	-0.727994	0.127588	-0.110675	-0.94882	-0.454293	0.220721	0.238537	0.275713	-1.11472	-0.000728539	-0.0988941	-0.277193	-0.621913	0.346714	0.10714	0.420408	1.10278	-0.977934	0.251015	0.161042	-0.804128	-0.29392	-0.28167
-17.4115		-0.988859	-0.0588489	-0.0600071	-0.735063	-0.602183	1.88636	-0.0971572	0.127406	0.171196	0.195701	-0.769789	0.274707	-0.049435	-0.911235	0.678979	1.53089	-0.589262	-0.872725	-0.158409	-0.130898	-0.182116		1.46013	0.189053	0.0513665	-0.680448	0.0150968	-0.190101	-0.995402	-0.464633	0.262773	0.270304	0.27888	-1.02031	-0.0426927	-0.0630807	-0.289197	-0.468067	0.474845	0.297111	0.501275	0.968083	-1.07432	0.495104	0.187204	-0.998723	-0.30368	-0.31416
-17.3613		-0.928739	0.0174377	-0.0761002	-0.742489	-0.601985	1.84219	-0.101668	0.117414	0.171083	0.220305	-0.76299	0.348599	-0.154316	-0.783903	0.622441	1.39815	-0.500625	-0.819523	-0.127617	-0.0493632	-0.306512		1.49783	0.279185	0.0150569	-0.603989	-0.049322	-0.174501	-1.0079	-0.479533	0.277809	0.3414	0.301279	-0.980815	-0.114507	-0.0429274	-0.295879	-0.317595	0.452726	0.311873	0.492715	0.855906	-1.07923	0.743957	0.0658183	-1.18885	-0.32832	-0.30118
-17.3111		-0.940714	0.0428467	-0.125409	-0.697059	-0.635027	1.86368	-0.109354	0.119483	0.155784	0.278927	-0.666824	0.373259	-0.366394	-0.605212	0.541132	1.25679	-0.415494	-0.816509	-0.112559	0.0811393	-0.331403		1.3413	0.318804	-0.0419979	-0.501732	-0.0949351	-0.138731	-0.916369	-0.508997	0.273787	0.378149	0.325287	-1.04677	-0.199744	-0.0150514	-0.286414	-0.151049	0.447548	0.058971	0.363075	0.828758	-0.993235	0.953424	-0.106235	-1.20714	-0.33174	-0.25474
-17.2609		-0.96626	0.0478853	-0.214362	-0.642057	-0.716554	1.94087	-0.102848	0.126328	0.142734	0.323146	-0.559266	0.424607	-0.475659	-0.521604	0.474328	1.17151	-0.382134	-0.883643	-0.126624	0.20735	-0.294563		1.14082	0.288785	-0.0754628	-0.379835	-0.163715	-0.166947	-0.729477	-0.528575	0.267399	0.357407	0.322968	-1.15798	-0.255525	-0.0051223	-0.263974	-0.13326	0.498408	-0.111159	0.195447	0.828216	-0.911919	1.12077	-0.139542	-1.09425	-0.30214	-0.19454
-17.2108		-0.988141	0.0819455	-0.269959	-0.630112	-0.795633	2.04481	-0.0804188	0.107793	0.139223	0.351368	-0.518161	0.508744	-0.451546	-0.625466	0.427017	1.10737	-0.383288	-0.938164	-0.12235	0.267819	-0.325873		1.10157	0.242459	0.0014469	-0.279995	-0.204734	-0.243025	-0.536569	-0.508759	0.257994	0.305014	0.267236	-1.22609	-0.264334	-0.0454321	-0.251781	-0.390226	0.467213	0.0190298	0.111089	0.751432	-0.890677	1.26386	0.0174632	-1.03869	-0.28401	-0.12593
-17.1606		-1.022	0.132246	-0.273779	-0.641793	-0.789655	2.1213	-0.0638508	0.0603066	0.141996	0.422595	-0.473367	0.560568	-0.406783	-0.801432	0.362774	1.01675	-0.373845	-0.907292	-0.0977934	0.236811	-0.433904		1.17555	0.22092	0.171776	-0.241414	-0.179827	-0.283577	-0.417583	-0.464429	0.214079	0.250151	0.146449	-1.25873	-0.256125	-0.106588	-0.265171	-0.688743	0.29995	0.18143	0.121726	0.630624	-0.895105	1.36347	0.182905	-1.12516	-0.28513	-0.05787
-17.1104		-1.03405	0.15013	-0.283682	-0.620148	-0.689526	2.09742	-0.0703848	0.0218204	0.150069	0.505965	-0.30082	0.569563	-0.381407	-0.855035	0.26018	0.914508	-0.360236	-0.807931	-0.0993654	0.142564	-0.50325		1.15626	0.22337	0.2777	-0.227943	-0.17536	-0.241911	-0.377548	-0.436092	0.120588	0.20581	-0.00297887	-1.32979	-0.265657	-0.129901	-0.294409	-0.692235	0.152634	0.112529	0.123221	0.565826	-0.881379	1.40891	0.147215	-1.27286	-0.2201	-0.01919
-17.0602		-0.980932	0.125824	-0.311726	-0.593719	-0.592674	1.97676	-0.0841593	0.0273108	0.161303	0.472946	-0.0480082	0.563764	-0.302549	-0.785913	0.167126	0.841286	-0.385192	-0.693953	-0.123987	0.0422215	-0.49695		1.02324	0.232738	0.201511	-0.176669	-0.27315	-0.153641	-0.372797	-0.432934	0.0274127	0.167614	-0.105961	-1.45024	-0.284788	-0.111992	-0.318689	-0.465976	0.161053	0.0153068	0.0529948	0.537049	-0.853018	1.47041	-0.0633932	-1.39728	-0.02852	-0.02414
-17.01		-0.907614	0.0880602	-0.304728	-0.657439	-0.604023	1.87857	-0.0716364	0.0623968	0.16546	0.306468	0.0785859	0.517563	-0.164271	-0.782072	0.164792	0.786675	-0.447037	-0.583576	-0.109243	-0.0325793	-0.508755		0.951475	0.230305	0.000355918	-0.125062	-0.387356	-0.0902269	-0.3644	-0.429603	-0.00184767	0.111184	-0.12844	-1.54327	-0.279961	-0.0997547	-0.32465	-0.376528	0.243579	0.196532	-0.0291422	0.442393	-0.832161	1.60339	-0.213739	-1.48368	0.194349	-0.04202
-16.9599		-0.900665	0.0647658	-0.268469	-0.808305	-0.711417	1.88322	-0.0234716	0.0768838	0.154854	0.165408	-0.0196839	0.414303	-0.104024	-0.932744	0.262663	0.697519	-0.493545	-0.464708	-0.0343162	-0.0992514	-0.592637		1.01381	0.204478	-0.200601	-0.183676	-0.379781	-0.0835327	-0.331714	-0.412135	0.0125568	0.0157071	-0.120286	-1.54691	-0.249489	-0.112727	-0.310031	-0.536552	0.273984	0.529825	-0.0596605	0.277593	-0.829758	1.69748	-0.148163	-1.50478	0.278111	-0.04196
-16.9097		-0.959083	0.0845338	-0.287437	-0.921094	-0.783212	1.89099	0.0341797	0.0471379	0.137818	0.157046	-0.187667	0.334891	-0.224964	-1.10738	0.360628	0.5599	-0.495188	-0.330079	0.0501223	-0.179123	-0.676285		1.09733	0.165259	-0.354433	-0.34734	-0.283829	-0.106928	-0.272331	-0.393482	-0.0166216	-0.0965452	-0.141904	-1.47581	-0.236062	-0.127784	-0.277177	-0.699226	0.308051	0.642198	-0.0809562	0.138825	-0.845985	1.57768	0.0336278	-1.42425	0.17438	-0.04855
-16.8595		-1.00281	0.167592	-0.38015	-0.928636	-0.71405	1.76079	0.0711467	0.0104522	0.132823	0.186537	-0.194877	0.334169	-0.439748	-1.15932	0.355454	0.42994	-0.469782	-0.189069	0.116146	-0.248241	-0.684633		1.09699	0.126894	-0.465946	-0.442521	-0.256997	-0.128883	-0.215707	-0.382531	-0.115966	-0.177944	-0.184741	-1.37208	-0.275701	-0.135698	-0.224989	-0.690748	0.449447	0.466526	-0.152304	0.0767378	-0.859064	1.27967	0.129564	-1.30676	-0.0056	-0.10203
-16.8093		-0.992453	0.272233	-0.450369	-0.90187	-0.568664	1.54189	0.0807473	0.0183378	0.148486	0.130974	-0.00291947	0.311473	-0.580571	-1.10182	0.270077	0.364986	-0.433868	-0.0716561	0.205135	-0.268013	-0.63469		1.00867	0.07371	-0.5226	-0.34007	-0.340795	-0.151745	-0.206181	-0.366535	-0.206436	-0.224496	-0.210528	-1.25477	-0.35366	-0.157948	-0.151872	-0.607672	0.607281	0.274391	-0.225727	0.052143	-0.829653	1.05957	0.0889301	-1.28293	-0.13956	-0.18024
-16.7592		-0.953083	0.308914	-0.438287	-0.898696	-0.529066	1.40466	0.0725933	0.0626595	0.172431	0.0327513	0.207054	0.175247	-0.595989	-1.02128	0.217345	0.351506	-0.389796	-0.0132728	0.341134	-0.249824	-0.559576		0.860886	-0.0138051	-0.534502	-0.13835	-0.425779	-0.172461	-0.243714	-0.336479	-0.216928	-0.284353	-0.229955	-1.13359	-0.42355	-0.203573	-0.0721187	-0.541497	0.623244	0.232894	-0.218847	0.0113839	-0.760808	1.06596	0.0229849	-1.37222	-0.19853	-0.22212
-16.709		-0.895795	0.254606	-0.413739	-0.866388	-0.663428	1.35953	0.0548504	0.0819385	0.184355	-0.00176436	0.257866	0.0398045	-0.553172	-0.94156	0.231309	0.328659	-0.366864	0.0004021	0.464807	-0.235847	-0.44376		0.707452	-0.0966141	-0.555961	-0.0270707	-0.447115	-0.148926	-0.270109	-0.311988	-0.183472	-0.384991	-0.279773	-1.01855	-0.459742	-0.253443	-0.0149838	-0.410792	0.564802	0.218168	-0.169038	-0.0639939	-0.722769	1.15656	0.00122857	-1.46215	-0.20057	-0.22174
-16.6588		-0.808734	0.190307	-0.446609	-0.773568	-0.807398	1.23596	0.0327275	0.0492277	0.181825	0.00802248	0.16347	0.0534328	-0.506506	-0.850067	0.218208	0.272402	-0.405827	0.0508247	0.503953	-0.214528	-0.299181		0.636247	-0.100979	-0.593282	-0.00912426	-0.456097	-0.0604246	-0.244528	-0.318468	-0.188663	-0.503271	-0.343742	-0.904153	-0.475423	-0.292992	0.0108241	-0.170778	0.627057	0.0816903	-0.197004	-0.156292	-0.759105	1.12971	-0.0319517	-1.48709	-0.14862	-0.22983
-16.6086		-0.726598	0.178865	-0.478436	-0.71379	-0.760584	0.974108	0.0105717	0.0125268	0.18306	-0.0317786	0.0640043	0.126181	-0.456583	-0.764618	0.112699	0.223287	-0.48291	0.193148	0.460408	-0.121207	-0.215803		0.656076	-0.0242949	-0.576962	0.112647	-0.475573	0.0367856	-0.201261	-0.34001	-0.24478	-0.620122	-0.358315	-0.795269	-0.490374	-0.326605	0.0362563	0.0346948	0.781648	-0.116533	-0.322966	-0.2255	-0.806681	0.990551	-0.109557	-1.50495	-0.05733	-0.25434
-16.5584		-0.721006	0.179317	-0.4141	-0.765883	-0.562107	0.750522	-0.0146838	0.0219362	0.195417	-0.110568	0.028178	0.0693197	-0.39913	-0.697549	-0.0117322	0.22023	-0.520565	0.365426	0.384565	0.0499142	-0.250106		0.650385	0.038157	-0.487683	0.445246	-0.435376	0.0877595	-0.193964	-0.322595	-0.289502	-0.739401	-0.292406	-0.744785	-0.50093	-0.356166	0.0888939	0.0561198	0.816911	-0.208935	-0.425985	-0.257555	-0.786093	0.871541	-0.139027	-1.56542	0.010295	-0.23319
-16.5083		-0.797942	0.13985	-0.272373	-0.841016	-0.444976	0.728536	-0.0490931	0.0567709	0.196223	-0.12473	-0.000424384	-0.0715715	-0.337615	-0.618409	-0.0626879	0.235524	-0.503471	0.45854	0.313104	0.198447	-0.322239		0.547572	-0.00196741	-0.407957	0.814676	-0.310008	0.141555	-0.213872	-0.243964	-0.276386	-0.834181	-0.176832	-0.794498	-0.498004	-0.37404	0.145284	-0.074167	0.734823	-0.12901	-0.407579	-0.297407	-0.733391	0.818219	-0.0389298	-1.61854	-0.00884	-0.13785
-16.4581		-0.867078	0.0971447	-0.149803	-0.794482	-0.514982	0.83267	-0.0824745	0.0656656	0.164545	-0.0508713	-0.0701828	-0.0928174	-0.278026	-0.519159	-0.0715428	0.208703	-0.50807	0.463682	0.271289	0.233763	-0.313254		0.424624	-0.1382	-0.377793	0.957297	-0.199074	0.283741	-0.214994	-0.155606	-0.224202	-0.852964	-0.0616592	-0.882199	-0.500077	-0.381882	0.159049	-0.244134	0.789569	0.0411521	-0.31192	-0.377888	-0.746361	0.786657	0.0959546	-1.59877	-0.0963	-0.04143
-16.4079		-0.841109	0.102977	-0.0814232	-0.646244	-0.625532	0.882064	-0.0913472	0.0459776	0.119146	0.0114175	-0.131788	0.00237869	-0.25401	-0.461729	-0.117786	0.134827	-0.573015	0.473646	0.278864	0.190436	-0.229933		0.346388	-0.30319	-0.309087	0.857766	-0.189617	0.477515	-0.199169	-0.11882	-0.181436	-0.812134	0.0164689	-0.89483	-0.534857	-0.39348	0.126382	-0.428975	1.05668	0.160822	-0.251233	-0.436602	-0.830683	0.75223	0.0760424	-1.50831	-0.15529	-0.02844
-16.3577		-0.72806	0.114655	-0.0283927	-0.573214	-0.625955	0.844074	-0.0714419	0.0336932	0.0985021	-0.0149186	-0.123422	0.00074362	-0.299711	-0.490131	-0.185899	0.0767452	-0.61961	0.537111	0.303112	0.169708	-0.186282		0.255408	-0.446401	-0.130701	0.790413	-0.225529	0.57393	-0.215781	-0.118755	-0.172014	-0.801053	0.0363514	-0.821583	-0.58774	-0.4118	0.0888805	-0.634173	1.27304	0.13752	-0.275054	-0.388649	-0.906752	0.702051	-0.14806	-1.38061	-0.11493	-0.07038
-16.3076		-0.609061	0.0547447	0.0252526	-0.68308	-0.579992	0.837533	-0.0468666	0.0382457	0.109756	-0.0899719	-0.0733443	-0.157221	-0.365716	-0.53815	-0.210501	0.0780267	-0.567449	0.594725	0.260984	0.205012	-0.236777		0.134933	-0.55714	0.0903059	1.0026	-0.204147	0.501474	-0.280344	-0.0927176	-0.178711	-0.850266	0.00673672	-0.764505	-0.609372	-0.41903	0.075595	-0.765007	1.23349	0.000973799	-0.351511	-0.268887	-0.947829	0.615016	-0.409466	-1.23855	-0.01659	-0.0514
-16.2574		-0.553598	-0.0542369	0.0494373	-0.889457	-0.621575	0.939403	-0.0358884	0.0398882	0.124767	-0.143177	-0.0557936	-0.286539	-0.352606	-0.50693	-0.203232	0.101433	-0.461149	0.586841	0.124727	0.247924	-0.314336		0.10936	-0.637223	0.27514	1.4316	-0.144516	0.356727	-0.34913	-0.0293418	-0.167002	-0.872532	-0.0228176	-0.782699	-0.5888	-0.398949	0.074291	-0.71006	1.06342	-0.121225	-0.430234	-0.206527	-0.996257	0.549175	-0.502501	-1.11267	0.032477	0.086625
-16.2072		-0.56639	-0.112628	0.0329581	-1.03734	-0.718568	1.09036	-0.0318613	0.0369653	0.123291	-0.176328	-0.0848111	-0.27371	-0.271119	-0.413674	-0.214673	0.0811996	-0.400944	0.555359	-0.0231534	0.252018	-0.345993		0.238425	-0.665476	0.471786	1.78388	-0.156465	0.267551	-0.382835	0.027917	-0.123816	-0.78722	-0.00101754	-0.814124	-0.575696	-0.360701	0.0613137	-0.532143	0.939596	-0.154986	-0.473542	-0.253692	-1.05273	0.635208	-0.402366	-1.02703	-0.00888	0.273728
-16.157		-0.597649	-0.0918938	0.0056131	-1.07788	-0.7382	1.17758	-0.0290025	0.0455125	0.113334	-0.22024	-0.105836	-0.232558	-0.256725	-0.374469	-0.21589	0.00917	-0.398403	0.589999	-0.0982385	0.202175	-0.357655		0.36129	-0.591633	0.733344	1.84891	-0.2564	0.247753	-0.388513	0.0738336	-0.0736845	-0.632859	0.0780527	-0.773611	-0.60453	-0.32856	0.0327893	-0.425618	0.814715	-0.182459	-0.444341	-0.324515	-1.06537	0.879289	-0.285626	-0.950976	-0.06948	0.39811
-16.1069		-0.601353	-0.0626002	-0.00640473	-1.06361	-0.670609	1.14935	-0.0356291	0.0597299	0.107404	-0.249249	-0.073581	-0.271304	-0.360981	-0.433816	-0.142485	-0.0706957	-0.389122	0.710436	-0.131311	0.0926264	-0.42389		0.298358	-0.390607	0.945456	1.6796	-0.311696	0.246781	-0.387454	0.157745	-0.0524522	-0.502457	0.192605	-0.650026	-0.642142	-0.309551	-0.0027158	-0.451259	0.62691	-0.310574	-0.313597	-0.320492	-1.03101	1.09138	-0.325341	-0.835712	-0.07083	0.427376
-16.0567		-0.587514	-0.0554461	-0.00600898	-1.02096	-0.621657	1.05535	-0.0474186	0.0570488	0.103096	-0.22733	-0.00661819	-0.320109	-0.445775	-0.496983	-0.0308687	-0.143487	-0.356843	0.847045	-0.214133	-0.0490583	-0.550055		0.0982187	-0.127144	0.937849	1.48723	-0.20442	0.263787	-0.384301	0.288169	-0.0675711	-0.432877	0.336254	-0.48531	-0.64738	-0.285345	-0.0462284	-0.449579	0.534832	-0.472349	-0.0980779	-0.249982	-1.00328	1.11655	-0.47576	-0.704295	-0.03509	0.422989
-16.0065		-0.601093	0.00957896	-0.00735017	-0.922177	-0.625445	1.00477	-0.0438668	0.0386653	0.0935379	-0.200793	0.02315	-0.284872	-0.367906	-0.463763	0.0129876	-0.249695	-0.355603	0.925377	-0.363927	-0.141954	-0.652479		-0.043109	0.0806714	0.727663	1.41951	0.00648825	0.313252	-0.382181	0.398778	-0.0892498	-0.41304	0.500686	-0.330266	-0.638654	-0.243425	-0.107104	-0.302655	0.679402	-0.487387	0.127638	-0.201807	-0.997832	1.02216	-0.510074	-0.631392	-0.04284	0.45544
-15.9563		-0.650658	0.195441	-0.0155487	-0.793348	-0.622369	1.06524	-0.0289372	0.0298742	0.0792214	-0.230077	-0.0447943	-0.202286	-0.162937	-0.360918	-0.0190105	-0.409026	-0.414006	0.939346	-0.504966	-0.132415	-0.663883		-0.0199991	0.178859	0.494347	1.45323	0.140961	0.329966	-0.389565	0.443501	-0.0781628	-0.439038	0.636536	-0.244756	-0.654355	-0.202655	-0.177835	-0.164456	0.890897	-0.316498	0.27833	-0.241005	-0.983686	0.956501	-0.304952	-0.634006	-0.11542	0.532136
-15.9061		-0.698406	0.418227	-0.0176062	-0.75024	-0.600124	1.18382	-0.0352067	0.0440456	0.0624155	-0.242699	-0.180053	-0.147077	0.0352415	-0.2947	-0.014097	-0.556873	-0.48942	0.944865	-0.56688	-0.0702128	-0.628221		0.120744	0.209237	0.326673	1.46833	0.104028	0.235236	-0.396516	0.458101	-0.0246158	-0.495902	0.692369	-0.272654	-0.683618	-0.193265	-0.22505	-0.267091	0.907918	-0.12108	0.323122	-0.345892	-0.965456	0.947634	-0.021506	-0.655776	-0.20346	0.609725
-15.856		-0.728406	0.529971	0.0121977	-0.851626	-0.604053	1.23751	-0.066582	0.0719363	0.0417206	-0.096799	-0.273402	-0.113644	0.152357	-0.317048	0.0912006	-0.605972	-0.527287	1.00102	-0.555814	-0.0283635	-0.647368		0.27241	0.212024	0.153673	1.39379	-0.00972691	0.0846101	-0.380162	0.488337	0.0321659	-0.529206	0.688555	-0.379645	-0.691233	-0.220234	-0.225405	-0.535495	0.759251	-0.0497637	0.299886	-0.428249	-0.983225	0.951937	0.0798471	-0.646309	-0.27642	0.660903
-15.8058		-0.766374	0.501729	0.0764311	-0.978051	-0.617088	1.17313	-0.0799493	0.0970055	0.0177395	0.182679	-0.279485	-0.0674241	0.172389	-0.387308	0.21619	-0.55654	-0.518271	1.12151	-0.539971	0.0126576	-0.727096		0.343818	0.16513	-0.0594454	1.26632	-0.0366325	0.0192552	-0.350464	0.51863	0.0371516	-0.501441	0.6915	-0.463307	-0.684162	-0.262712	-0.204683	-0.599631	0.661362	-0.0927655	0.266876	-0.412709	-1.03184	0.979159	-0.0462525	-0.575816	-0.34349	0.712207
-15.7556		-0.807246	0.439715	0.124956	-0.962329	-0.572985	1.05041	-0.0496671	0.100969	-0.00356052	0.383496	-0.298515	-0.0112355	0.0889058	-0.440889	0.265093	-0.482202	-0.485011	1.2777	-0.585438	0.101163	-0.738169		0.307695	0.0519183	-0.211784	1.15857	0.0639926	0.0577933	-0.354535	0.518815	-0.00975714	-0.454588	0.710338	-0.45769	-0.697407	-0.303663	-0.21307	-0.274121	0.643443	-0.177365	0.248449	-0.305865	-1.05749	1.03872	-0.209909	-0.406468	-0.37722	0.804923
-15.7054		-0.79089	0.422811	0.0978428	-0.817555	-0.491091	0.937967	-0.00812311	0.0708895	-0.0171753	0.384826	-0.423229	0.0547616	-0.0522856	-0.450166	0.276245	-0.401531	-0.443673	1.43925	-0.683374	0.17797	-0.585444		0.230461	-0.074816	-0.227468	1.09517	0.186975	0.0696562	-0.409994	0.512095	-0.0417036	-0.458245	0.681678	-0.391462	-0.730587	-0.343746	-0.260139	0.140665	0.559667	-0.281899	0.229403	-0.185574	-1.03035	1.05512	-0.245738	-0.163422	-0.30636	0.924524
-15.6553		-0.701017	0.405957	0.00427293	-0.716574	-0.468277	0.844867	0.00636574	0.0214347	-0.0243624	0.306886	-0.562536	0.145747	-0.153935	-0.422248	0.359545	-0.245685	-0.395405	1.59296	-0.736328	0.138658	-0.361113		0.205945	-0.147094	-0.181233	1.067	0.242386	-0.00957214	-0.460286	0.544127	-0.0193702	-0.50417	0.571466	-0.317881	-0.749782	-0.387799	-0.305024	0.20682	0.406805	-0.397134	0.189599	-0.127254	-0.963709	0.971708	-0.169543	-0.00138834	-0.12848	0.993168
-15.6051		-0.632033	0.310831	-0.0813066	-0.73988	-0.526749	0.786769	0.00267218	-0.00996014	-0.0300979	0.291573	-0.567939	0.226612	-0.185965	-0.373017	0.519472	0.00440028	-0.347876	1.71701	-0.658268	0.0138131	-0.235305		0.237532	-0.162699	-0.172178	1.08427	0.261252	-0.0752439	-0.429226	0.611456	0.000395143	-0.511783	0.432455	-0.233799	-0.743333	-0.429262	-0.314134	-0.0891668	0.332489	-0.472952	0.130294	-0.150545	-0.88437	0.878506	-0.0860948	-0.0519405	0.046109	0.946283
-15.5549		-0.684995	0.148922	-0.112546	-0.778763	-0.582208	0.820428	0.00786373	-0.0103475	-0.038969	0.289445	-0.498596	0.227939	-0.215143	-0.324075	0.638851	0.232501	-0.331174	1.76858	-0.487999	-0.0603087	-0.22516		0.239777	-0.167136	-0.173711	1.15294	0.298138	-0.0350885	-0.315993	0.662151	-0.0437174	-0.450458	0.336062	-0.113098	-0.73217	-0.448618	-0.295368	-0.33249	0.333502	-0.482688	0.0680294	-0.221616	-0.835826	0.902576	-0.0548558	-0.215125	0.125785	0.802475
-15.5047		-0.822154	0.00849527	-0.118081	-0.732276	-0.579236	0.937145	0.0202556	-0.0102517	-0.0536691	0.205385	-0.552899	0.159488	-0.260713	-0.317086	0.655465	0.32294	-0.37207	1.7289	-0.347171	-0.0527753	-0.191858		0.163161	-0.178165	-0.114519	1.21264	0.309004	0.0331583	-0.21156	0.658831	-0.0950318	-0.393625	0.296477	0.0156539	-0.729931	-0.426336	-0.272921	-0.232702	0.218167	-0.490563	0.016417	-0.28735	-0.868803	0.994077	-0.0603293	-0.268554	0.154669	0.646868
-15.4546		-0.896529	-0.0506512	-0.137609	-0.660873	-0.565643	1.01052	0.0219275	-0.0353067	-0.0732021	0.120252	-0.717611	0.112489	-0.228184	-0.397691	0.666506	0.326518	-0.443988	1.64225	-0.288237	-0.0668912	-0.0639085		0.0563554	-0.174021	-0.0332711	1.16697	0.2232	0.00780632	-0.207935	0.623267	-0.0496697	-0.405205	0.288811	0.0870355	-0.728627	-0.364153	-0.264929	0.0425815	-0.0865576	-0.578977	-0.0186835	-0.325474	-0.968675	0.952702	-0.0517463	-0.186123	0.22588	0.56213
-15.4044		-0.829772	-0.0501874	-0.158478	-0.654201	-0.607792	0.951924	0.010961	-0.0669575	-0.0910764	0.179976	-0.728584	0.117167	-0.0571989	-0.551683	0.795361	0.389949	-0.472457	1.57149	-0.257947	-0.142543	0.0708875		-0.00282439	-0.149718	-0.0273849	0.995697	0.0882084	-0.0863386	-0.300619	0.623593	0.0665568	-0.425913	0.301585	0.082405	-0.718803	-0.291343	-0.287183	0.169815	-0.410107	-0.719072	-0.0347802	-0.375055	-1.0348	0.694465	-0.0183414	-0.153423	0.323719	0.581851
-15.3542		-0.702851	-0.0523106	-0.153989	-0.664444	-0.69597	0.848379	-0.00457539	-0.0771349	-0.0983665	0.352244	-0.479562	0.0956105	0.163884	-0.67241	1.00788	0.546838	-0.420362	1.52085	-0.215477	-0.189315	0.125938		0.0130657	-0.132193	-0.0823735	0.789834	0.0208586	-0.129802	-0.402429	0.710558	0.114688	-0.354911	0.341558	0.0385045	-0.695055	-0.238692	-0.337711	0.105604	-0.584593	-0.784088	-0.0349483	-0.476551	-0.993424	0.383351	-0.0344084	-0.235789	0.342316	0.678504
-15.304		-0.646418	-0.0936897	-0.146991	-0.593247	-0.762821	0.832095	-0.0232411	-0.0751126	-0.0915499	0.49339	-0.229707	-0.00201187	0.309807	-0.648249	1.14341	0.683944	-0.34052	1.4398	-0.195172	-0.155797	0.137177		0.0722756	-0.119598	-0.0814163	0.647643	0.0333647	-0.0963459	-0.45494	0.849902	0.049186	-0.217123	0.409248	-0.0219834	-0.650328	-0.211472	-0.375571	0.0494372	-0.646826	-0.714165	-0.029335	-0.560752	-0.892025	0.226091	-0.15431	-0.255893	0.249547	0.77669
-15.2538		-0.684864	-0.161845	-0.175927	-0.462541	-0.766517	0.869092	-0.0412165	-0.0885685	-0.0775773	0.598749	-0.228559	-0.104522	0.368687	-0.496476	1.11374	0.715878	-0.302597	1.3055	-0.22351	-0.115617	0.167131		0.113187	-0.0614366	0.00944058	0.57201	0.0339878	-0.0760248	-0.491898	0.937105	-0.0183852	-0.142807	0.488843	-0.107801	-0.591198	-0.202199	-0.358929	0.0946461	-0.721364	-0.592764	-0.0220042	-0.473094	-0.823767	0.210032	-0.264101	-0.0918095	0.145218	0.810527
-15.2037		-0.734933	-0.223539	-0.211029	-0.369712	-0.730595	0.808276	-0.0461349	-0.117354	-0.068964	0.772642	-0.344559	-0.120314	0.411265	-0.359288	0.990242	0.69446	-0.29749	1.16622	-0.255453	-0.130479	0.201901		0.0890982	0.0499499	0.0878177	0.506204	-0.00630704	-0.127235	-0.570858	0.908346	0.000146269	-0.173284	0.553081	-0.203732	-0.545791	-0.217755	-0.307578	0.134299	-0.822572	-0.496339	-0.00550285	-0.178873	-0.798664	0.151212	-0.182974	0.116284	0.131015	0.790544
-15.1535		-0.740139	-0.264297	-0.17662	-0.32662	-0.698252	0.614727	-0.0363279	-0.135942	-0.0718008	0.979605	-0.306997	-0.0688711	0.474478	-0.346767	0.881341	0.717928	-0.272176	1.08746	-0.231937	-0.158932	0.213907		0.0176011	0.124153	0.0875835	0.434015	-0.0228306	-0.201075	-0.678801	0.814189	0.0490531	-0.199624	0.577686	-0.26462	-0.529765	-0.267178	-0.282264	0.0987721	-0.860264	-0.355354	0.0134053	0.122647	-0.756904	-0.0251152	0.0583653	0.193752	0.185595	0.778435
-15.1033		-0.744776	-0.288311	-0.0742802	-0.27065	-0.666278	0.423973	-0.029682	-0.130341	-0.0799733	1.05299	-0.153275	-0.0534111	0.548363	-0.434259	0.80427	0.810638	-0.233799	1.07577	-0.140339	-0.157259	0.231486		-0.0281286	0.0969068	0.0937513	0.379538	0.0037815	-0.227669	-0.749997	0.749561	0.051583	-0.133093	0.559554	-0.285602	-0.522455	-0.328698	-0.298258	0.0944967	-0.792373	-0.0948137	-0.00143339	0.2021	-0.685482	-0.178521	0.220263	0.189436	0.220217	0.782157
-15.0531		-0.813429	-0.285201	-0.00894146	-0.202332	-0.603002	0.355476	-0.0390704	-0.110633	-0.0835259	0.958098	-0.135213	-0.129148	0.639482	-0.532344	0.72543	0.932239	-0.241526	1.07536	0.00259044	-0.154152	0.271671		-0.000579586	0.0636061	0.20362	0.32629	0.0190267	-0.209039	-0.756718	0.743903	0.0431818	-0.0309204	0.513095	-0.318224	-0.50594	-0.3593	-0.308931	0.235604	-0.699269	0.159332	-0.0696749	0.0901449	-0.650278	-0.161564	0.195221	0.243178	0.227021	0.741571
-15.003		-0.92469	-0.229625	-0.0428906	-0.188565	-0.529551	0.37761	-0.052837	-0.0951933	-0.081026	0.829704	-0.266966	-0.241619	0.769696	-0.591918	0.660748	1.04447	-0.301061	1.03439	0.163499	-0.169566	0.282584		0.0757517	0.164155	0.354238	0.229949	0.0172681	-0.188469	-0.733181	0.76736	0.0955335	0.0106072	0.449719	-0.386367	-0.502287	-0.338517	-0.284415	0.452238	-0.686038	0.210655	-0.146709	0.0343856	-0.702991	-0.0306264	0.148954	0.32047	0.296381	0.650782
-14.9528		-0.990056	-0.12921	-0.0933879	-0.241289	-0.513962	0.384516	-0.053542	-0.0953448	-0.0804008	0.729491	-0.294992	-0.296921	0.903553	-0.60822	0.649841	1.11808	-0.348202	0.95837	0.278039	-0.163023	0.224658		0.157183	0.355765	0.400355	0.130083	0.0507245	-0.167783	-0.71552	0.804635	0.188165	-0.00236366	0.383963	-0.442074	-0.531837	-0.276542	-0.255552	0.563373	-0.737366	0.109725	-0.171502	0.155323	-0.803725	0.0225224	0.221412	0.248584	0.465296	0.607889
-14.9026		-0.959605	-0.0388911	-0.053846	-0.300861	-0.557504	0.329924	-0.0460374	-0.10767	-0.0885017	0.584493	-0.126202	-0.270781	0.934547	-0.5893	0.656447	1.11387	-0.347539	0.891053	0.298864	-0.115097	0.144831		0.238315	0.446945	0.330065	0.148222	0.104698	-0.113562	-0.70144	0.850821	0.248173	-0.00829731	0.349563	-0.445117	-0.561822	-0.177999	-0.25911	0.508768	-0.728183	0.117209	-0.154242	0.290173	-0.862392	-0.107792	0.281863	-0.0333965	0.621709	0.674587
-14.8524		-0.867093	0.00174576	0.0445751	-0.332374	-0.568656	0.248752	-0.0511281	-0.117693	-0.101237	0.395912	0.0210626	-0.226208	0.795331	-0.562177	0.593433	1.01624	-0.333132	0.855136	0.267606	-0.0679853	0.108578		0.329621	0.362367	0.284833	0.320273	0.111658	-0.0416994	-0.673535	0.860893	0.266841	-0.0114304	0.361425	-0.432451	-0.549701	-0.028317	-0.281988	0.438203	-0.598685	0.315668	-0.153132	0.25608	-0.839529	-0.352957	0.135879	-0.377017	0.632981	0.768246
-14.8022		-0.773515	0.0167595	0.097671	-0.343116	-0.505284	0.190198	-0.0723893	-0.119552	-0.102292	0.281292	-0.0246829	-0.225641	0.56366	-0.54782	0.462503	0.876636	-0.335084	0.832002	0.260337	-0.0398277	0.12015		0.419434	0.220324	0.35408	0.516865	0.096084	-0.0265445	-0.629956	0.787978	0.291838	-0.063257	0.367358	-0.449849	-0.516422	0.170925	-0.288533	0.550084	-0.44411	0.47833	-0.167795	0.142589	-0.78253	-0.566233	-0.160587	-0.560563	0.525508	0.783746
-14.7521		-0.701995	0.0480189	0.103191	-0.316381	-0.461721	0.164649	-0.0829237	-0.124337	-0.0751461	0.252536	-0.135311	-0.261817	0.393091	-0.500254	0.377299	0.778592	-0.337461	0.800047	0.262398	0.0079824	0.167379		0.491397	0.126477	0.457835	0.59382	0.1429	-0.0925611	-0.582077	0.668823	0.335069	-0.155255	0.303513	-0.455806	-0.51393	0.375335	-0.276103	0.859875	-0.372926	0.404003	-0.13936	0.194877	-0.76337	-0.646858	-0.363546	-0.478858	0.438232	0.746243
-14.7019		-0.639859	0.091882	0.138751	-0.22898	-0.53504	0.149457	-0.0540861	-0.135673	-0.0257401	0.169248	-0.113249	-0.28842	0.338951	-0.357006	0.402543	0.753721	-0.33156	0.76685	0.199467	0.0695096	0.278706		0.548285	0.05321	0.487438	0.550426	0.215034	-0.163592	-0.54032	0.595332	0.365604	-0.210939	0.198435	-0.37036	-0.532329	0.526298	-0.27439	1.16248	-0.356957	0.191743	-0.0698366	0.460441	-0.800379	-0.587191	-0.359482	-0.233458	0.420031	0.734346
-14.6517		-0.583311	0.119046	0.197887	-0.130821	-0.670744	0.13078	0.00758043	-0.135496	0.0102121	-0.00989402	0.023715	-0.275079	0.336816	-0.190026	0.449573	0.760425	-0.343822	0.74695	0.101181	0.0585219	0.4635		0.595504	-0.0360065	0.48405	0.477752	0.185605	-0.178579	-0.512556	0.594298	0.377848	-0.181035	0.142569	-0.205389	-0.507778	0.601912	-0.298994	1.25257	-0.318325	0.0759577	-0.0419567	0.719725	-0.851577	-0.458557	-0.289959	-0.0427129	0.395111	0.722397
-14.6015		-0.559972	0.126318	0.200116	-0.107514	-0.732683	0.125233	0.0643685	-0.117607	0.000228808	-0.126486	0.129316	-0.21692	0.353965	-0.190959	0.399311	0.748589	-0.383428	0.725507	0.107234	-0.0576119	0.645678		0.636312	-0.105597	0.587608	0.428201	0.0766463	-0.189674	-0.509892	0.603158	0.395411	-0.09714	0.149595	-0.0678635	-0.422026	0.630681	-0.325262	1.15763	-0.293669	0.131088	-0.0753576	0.786177	-0.871511	-0.37045	-0.359761	-0.0102845	0.332061	0.632998
-14.5514		-0.603799	0.123093	0.151472	-0.153494	-0.679875	0.155906	0.0906512	-0.111897	-0.0424317	-0.0637829	0.153972	-0.143522	0.428522	-0.423104	0.266281	0.714443	-0.422106	0.666927	0.262924	-0.176149	0.734811		0.704713	-0.149416	0.832025	0.403036	0.0732837	-0.258786	-0.542368	0.577336	0.408018	-0.0333881	0.143582	-0.021371	-0.327145	0.657308	-0.311139	1.08451	-0.380445	0.247705	-0.0613575	0.724929	-0.857822	-0.406031	-0.589893	-0.00852022	0.301253	0.497963
-14.5012		-0.711552	0.0931075	0.133691	-0.169467	-0.586269	0.231656	0.0994336	-0.140745	-0.0701874	0.0779216	0.137962	-0.124129	0.52023	-0.695223	0.156793	0.678739	-0.453158	0.555565	0.423191	-0.196342	0.740672		0.860649	-0.223414	1.07856	0.398848	0.24763	-0.3223	-0.599297	0.557528	0.370652	-0.0408433	0.0961422	-0.0114051	-0.263685	0.699743	-0.242042	1.14236	-0.550069	0.308634	0.0785669	0.70083	-0.845427	-0.546474	-0.787309	0.125185	0.317774	0.420597
-14.451		-0.833021	0.0217697	0.133937	-0.101831	-0.522227	0.357288	0.117374	-0.173638	-0.0608205	0.13737	0.0801744	-0.188679	0.484661	-0.790802	0.107598	0.639511	-0.513122	0.414629	0.436762	-0.167377	0.752493		1.11544	-0.319211	1.17362	0.399633	0.448402	-0.280804	-0.641032	0.606423	0.284553	-0.108408	0.0625669	0.0439503	-0.217629	0.739726	-0.149044	1.23521	-0.648475	0.295084	0.244867	0.727201	-0.868951	-0.656393	-0.767483	0.333533	0.27218	0.398435
-14.4008		-0.915217	-0.0527311	0.0577628	-0.00576844	-0.504877	0.511671	0.146388	-0.167381	-0.0407917	0.086224	-0.0445169	-0.24476	0.287288	-0.725354	0.0631821	0.5771	-0.613755	0.289213	0.343312	-0.201753	0.815635		1.39098	-0.352793	1.11066	0.375979	0.532592	-0.181764	-0.635313	0.728951	0.22608	-0.175034	0.0525079	0.143317	-0.173685	0.753909	-0.0762956	1.26814	-0.596971	0.256971	0.276306	0.684748	-0.928662	-0.607194	-0.593843	0.431472	0.105204	0.328422
-14.3507		-0.950151	-0.0628646	-0.0736759	0.0545189	-0.541182	0.59829	0.165209	-0.133163	-0.0376345	-0.0100687	-0.189541	-0.171807	0.0965553	-0.648711	-0.00092879	0.499107	-0.702517	0.216545	0.304672	-0.294111	0.887854		1.59262	-0.331787	0.997408	0.337628	0.538679	-0.169182	-0.606765	0.883706	0.25834	-0.196387	-0.00959773	0.223796	-0.154273	0.74755	-0.0334689	1.30622	-0.490342	0.234255	0.17677	0.535376	-0.979286	-0.452414	-0.520389	0.41769	-0.06865	0.189595
-14.3005		-0.957909	0.0166662	-0.121905	0.0958267	-0.63154	0.512666	0.159136	-0.117137	-0.0377949	-0.102798	-0.273875	0.00500036	0.0523429	-0.592122	-0.0299703	0.449579	-0.722148	0.197948	0.39118	-0.334481	0.919832		1.70598	-0.368832	0.909039	0.336322	0.548045	-0.25899	-0.620498	1.03581	0.342942	-0.195147	-0.14187	0.261427	-0.18039	0.744492	0.00544504	1.40694	-0.464124	0.214561	0.113825	0.388657	-0.956913	-0.407514	-0.660676	0.489305	-0.11699	0.079958
-14.2503		-0.930231	0.147358	-0.063587	0.16421	-0.732489	0.318131	0.128409	-0.127463	-0.0151149	-0.160926	-0.287788	0.150103	0.072781	-0.488881	0.0132933	0.4591	-0.67007	0.187611	0.514973	-0.272553	0.919544		1.78517	-0.461184	0.830938	0.393138	0.536574	-0.313303	-0.704107	1.16561	0.377503	-0.216173	-0.246223	0.305224	-0.231414	0.743771	0.0561667	1.43413	-0.537373	0.175622	0.194872	0.343166	-0.84119	-0.575667	-0.829368	0.717072	-0.06985	0.048307
-14.2001		-0.839174	0.265585	-0.0446769	0.245692	-0.781248	0.241103	0.0752611	-0.131166	0.0199852	-0.166946	-0.278653	0.218035	0.0102968	-0.387276	0.0743583	0.503375	-0.577931	0.126118	0.56007	-0.157946	0.908797		1.85874	-0.44043	0.727199	0.476642	0.480411	-0.265238	-0.816228	1.2463	0.31238	-0.250765	-0.26665	0.414131	-0.26501	0.710831	0.09812	1.23804	-0.623911	0.153672	0.355152	0.357063	-0.693144	-0.768271	-0.812171	0.919678	-0.03003	0.020251
-14.1499		-0.718012	0.325823	-0.144159	0.284926	-0.758408	0.388824	0.0101219	-0.119521	0.0302996	-0.171489	-0.266298	0.28222	-0.119423	-0.438627	0.0678191	0.537136	-0.475194	0.00343415	0.521581	-0.0260023	0.866116		1.89071	-0.246674	0.603288	0.554721	0.478833	-0.225833	-0.903549	1.24834	0.204787	-0.259382	-0.294751	0.584132	-0.256366	0.629629	0.104346	0.948543	-0.653602	0.20407	0.489712	0.322082	-0.600843	-0.733371	-0.668079	0.959757	0.008583	-0.06346
-14.0998		-0.669248	0.326714	-0.252624	0.274124	-0.687127	0.582621	-0.0303185	-0.125624	0.00392052	-0.258669	-0.252397	0.36531	-0.194162	-0.656794	-0.0229019	0.5655	-0.393339	-0.126282	0.498176	0.141919	0.770653		1.83407	-0.0763777	0.4893	0.606131	0.623642	-0.300143	-0.949292	1.1718	0.158172	-0.254887	-0.426643	0.744791	-0.211112	0.541296	0.079934	0.861986	-0.647986	0.287138	0.580955	0.206447	-0.578827	-0.515562	-0.600507	0.983505	0.114858	-0.14794
-14.0496		-0.734711	0.308107	-0.262271	0.273298	-0.593507	0.603674	-0.00515968	-0.166331	-0.0288059	-0.411957	-0.274307	0.389955	-0.179645	-0.853339	-0.137185	0.646111	-0.36311	-0.209925	0.56099	0.323745	0.675179		1.68302	-0.115548	0.404237	0.599375	0.816684	-0.413043	-0.950637	1.05944	0.218135	-0.293522	-0.606421	0.828173	-0.157531	0.499571	0.0534066	1.03003	-0.691313	0.28737	0.640658	0.0677733	-0.557966	-0.405077	-0.637731	1.21356	0.247611	-0.16443
-13.9994		-0.80689	0.300192	-0.226851	0.336996	-0.512757	0.49507	0.0781431	-0.206597	-0.0338845	-0.511007	-0.356757	0.322937	-0.142216	-0.863788	-0.214338	0.80101	-0.383003	-0.254344	0.660689	0.429908	0.653463		1.46913	-0.277055	0.354093	0.53606	0.862363	-0.413464	-0.901502	0.967339	0.323447	-0.383429	-0.710271	0.840586	-0.128168	0.501114	0.0369146	1.16304	-0.831942	0.181063	0.642339	-0.0401704	-0.489375	-0.521284	-0.652184	1.62017	0.279932	-0.14195
-13.9492		-0.751226	0.277735	-0.239063	0.454644	-0.500412	0.455078	0.162379	-0.202323	-0.013899	-0.505175	-0.438708	0.243771	-0.12653	-0.732795	-0.256122	0.957465	-0.420349	-0.296557	0.696491	0.423153	0.667299		1.24785	-0.364931	0.331095	0.483536	0.724707	-0.278788	-0.830085	0.921276	0.36164	-0.470935	-0.717699	0.850586	-0.135847	0.496993	0.0122601	1.0045	-0.999858	0.0875485	0.604758	-0.108911	-0.411982	-0.657844	-0.615763	1.96618	0.1881	-0.15336
-13.8991		-0.589065	0.20223	-0.270249	0.573515	-0.573624	0.524205	0.209864	-0.15667	-0.00087148	-0.489365	-0.445736	0.239746	-0.126589	-0.629361	-0.304764	1.01684	-0.454557	-0.340555	0.652611	0.385053	0.57688		1.09603	-0.371279	0.298813	0.480005	0.573647	-0.11923	-0.801423	0.904971	0.287194	-0.524259	-0.703123	0.897375	-0.165918	0.464012	-0.0395556	0.647598	-1.05298	0.098982	0.639765	-0.138799	-0.390367	-0.623032	-0.598837	2.12318	0.084555	-0.21121
-13.8489		-0.466913	0.100708	-0.234881	0.653247	-0.656253	0.575001	0.244447	-0.11312	-0.0137329	-0.556016	-0.414278	0.320169	-0.145247	-0.647553	-0.369847	0.973176	-0.489216	-0.359747	0.594862	0.400934	0.333399		1.07344	-0.425761	0.217965	0.459368	0.563664	-0.0242456	-0.838588	0.889999	0.174701	-0.565144	-0.706444	0.940115	-0.192592	0.419899	-0.106758	0.388257	-0.946193	0.148044	0.792991	-0.129189	-0.434323	-0.526922	-0.572595	2.17881	0.047925	-0.27366
-13.7987		-0.454854	0.0476139	-0.13597	0.682995	-0.641709	0.557775	0.298096	-0.0995249	-0.0352472	-0.669049	-0.441407	0.444717	-0.200038	-0.731072	-0.411442	0.925311	-0.521963	-0.344314	0.540697	0.438105	0.0862145		1.16142	-0.542216	0.112595	0.369431	0.661959	0.0010048	-0.887674	0.869974	0.128945	-0.607428	-0.702605	0.923001	-0.194754	0.372395	-0.156872	0.363161	-0.805719	0.115029	0.92085	-0.109956	-0.516739	-0.569104	-0.4609	2.23734	0.039447	-0.30925
-13.7485		-0.478958	0.0708265	-0.055497	0.667862	-0.517016	0.548276	0.345709	-0.0968709	-0.0401393	-0.742273	-0.524742	0.567089	-0.278994	-0.767883	-0.415053	0.969128	-0.539459	-0.306527	0.436637	0.406395	0.0182376		1.27313	-0.609323	0.0651915	0.286423	0.729795	-0.0259817	-0.906605	0.859137	0.160242	-0.628032	-0.672085	0.85853	-0.161336	0.309488	-0.175434	0.443948	-0.757178	-0.0026444	0.872272	-0.122019	-0.625593	-0.703999	-0.346975	2.27271	0.021387	-0.31229
-13.6984		-0.466234	0.132	-0.0398754	0.618511	-0.392913	0.553838	0.338932	-0.0712716	-0.0359652	-0.750968	-0.56461	0.652483	-0.341424	-0.736305	-0.436227	1.10738	-0.539202	-0.250823	0.287803	0.297963	0.118672		1.33969	-0.586062	0.10376	0.275693	0.703205	-0.0882236	-0.935014	0.861012	0.195674	-0.616701	-0.626084	0.806955	-0.101586	0.248051	-0.179041	0.461426	-0.740997	-0.106643	0.725669	-0.154807	-0.753312	-0.740694	-0.380381	2.22748	0.042176	-0.29162
-13.6482		-0.44751	0.192799	-0.0551609	0.544451	-0.398214	0.462285	0.290475	-0.0253104	-0.0534442	-0.705181	-0.529493	0.703676	-0.36794	-0.734249	-0.513609	1.26724	-0.521058	-0.179035	0.195303	0.193285	0.211463		1.35164	-0.530652	0.1394	0.226415	0.640751	-0.13165	-1.0152	0.850359	0.199051	-0.600959	-0.568996	0.799059	-0.0489511	0.232303	-0.184457	0.435619	-0.629151	-0.146943	0.677843	-0.157037	-0.868563	-0.685007	-0.517779	2.12505	0.134674	-0.27688
-13.598		-0.468928	0.237985	-0.0363859	0.453043	-0.545209	0.227812	0.267718	0.00421413	-0.0972412	-0.599495	-0.504981	0.760387	-0.388904	-0.833464	-0.578321	1.37355	-0.471587	-0.11996	0.206979	0.144154	0.194034		1.3154	-0.460188	0.0785353	0.0111701	0.624194	-0.102089	-1.09687	0.796815	0.209678	-0.601857	-0.476064	0.823044	-0.0322934	0.263923	-0.181838	0.533715	-0.470754	-0.18165	0.744478	-0.117103	-0.938973	-0.73074	-0.595664	1.9991	0.218244	-0.30293
-13.5478		-0.491335	0.243439	0.0474647	0.369764	-0.706774	-0.0360511	0.293492	-0.000346193	-0.135243	-0.452457	-0.549353	0.843005	-0.446777	-0.944417	-0.540144	1.3932	-0.395937	-0.115071	0.228412	0.117347	0.141005		1.233	-0.344982	-0.0392902	-0.255572	0.658707	-0.0388849	-1.10242	0.706112	0.253865	-0.606516	-0.294199	0.869068	-0.0422456	0.287877	-0.153505	0.831162	-0.427577	-0.284593	0.764436	-0.0771072	-0.96063	-0.920939	-0.601548	1.81309	0.192136	-0.3627
-13.4976		-0.44851	0.191127	0.161864	0.345519	-0.754434	-0.208206	0.307729	-0.0156394	-0.144409	-0.320178	-0.602721	0.918253	-0.522557	-0.917228	-0.443023	1.33565	-0.336296	-0.172559	0.15563	0.0626898	0.139022		1.14531	-0.234477	-0.0956955	-0.339033	0.675682	-0.0414544	-1.05287	0.624197	0.291733	-0.600877	0.0430247	0.945655	-0.0470348	0.266802	-0.105367	1.1852	-0.471639	-0.4392	0.692346	-0.0634703	-0.943556	-1.06124	-0.627399	1.55603	0.075752	-0.40308
-13.4475		-0.350295	0.108368	0.232504	0.395777	-0.715645	-0.300324	0.256358	-0.019975	-0.137508	-0.219319	-0.590735	0.936985	-0.528219	-0.763216	-0.418893	1.23265	-0.305724	-0.264806	0.0216334	-0.0105425	0.125109		1.12427	-0.229154	-0.0658484	-0.239149	0.618126	-0.115857	-1.04255	0.590189	0.283566	-0.597065	0.550621	1.06295	-0.0381197	0.214763	-0.0576251	1.37608	-0.372988	-0.55482	0.678524	-0.0638895	-0.891618	-1.02543	-0.637156	1.3405	-0.02625	-0.38494
-13.3973		-0.260449	0.0281311	0.216338	0.434387	-0.728043	-0.385321	0.173361	-0.0260224	-0.132118	-0.111677	-0.539423	0.883036	-0.415964	-0.652371	-0.476585	1.11187	-0.242543	-0.37004	-0.0651446	-0.0496762	-0.0104171		1.17424	-0.307072	-0.0425639	-0.194008	0.509923	-0.148732	-1.10519	0.597675	0.249777	-0.615272	1.12664	1.22498	-0.0329518	0.145507	-0.0117168	1.32735	-0.0498098	-0.581066	0.811705	-0.0738798	-0.805934	-0.935929	-0.55205	1.27415	-0.06316	-0.32782
-13.3471		-0.203652	-0.0693449	0.137892	0.344144	-0.826531	-0.4654	0.130271	-0.04991	-0.124342	-0.00340388	-0.524845	0.785236	-0.266367	-0.665749	-0.468784	0.983725	-0.105824	-0.485185	-0.0748696	-0.033584	-0.215597		1.19217	-0.320784	-0.0779501	-0.314204	0.426832	-0.0749543	-1.18657	0.619363	0.225948	-0.660266	1.61288	1.42007	-0.0340552	0.0579863	0.049119	1.14348	0.275441	-0.569795	0.969468	-0.100229	-0.68623	-0.946647	-0.48296	1.2758	-0.06627	-0.28718
-13.2969		-0.150411	-0.204782	0.045624	0.147155	-0.887897	-0.482485	0.134291	-0.0777038	-0.110335	0.0278602	-0.565293	0.702507	-0.192469	-0.684212	-0.322681	0.859453	0.0199797	-0.59562	-0.073666	-0.0086987	-0.305881		1.08028	-0.20723	-0.0950145	-0.4396	0.402178	0.0231483	-1.2438	0.652188	0.205816	-0.722246	1.93734	1.60082	-0.0203902	-0.00806566	0.128844	0.977557	0.371925	-0.59971	1.01264	-0.11633	-0.539392	-1.02364	-0.586579	1.16441	-0.06907	-0.30107
-13.2468		-0.0742415	-0.322544	-0.0335998	0.0277092	-0.839004	-0.419243	0.130055	-0.0878776	-0.103634	-0.0511191	-0.627597	0.676893	-0.178736	-0.593633	-0.173307	0.772243	0.0138652	-0.667688	-0.116116	-0.0400369	-0.213628		0.872481	-0.0792444	-0.00579849	-0.41259	0.391629	0.040673	-1.29317	0.701835	0.170019	-0.786778	2.12836	1.70077	0.0109413	0.0135872	0.212481	0.92122	0.282879	-0.667029	0.981219	-0.0819304	-0.409323	-1.06059	-0.757967	0.927145	-0.08051	-0.35951
-13.1966		0.024703	-0.355675	-0.0736572	0.118113	-0.779517	-0.327742	0.0910639	-0.0811784	-0.109971	-0.168123	-0.695095	0.681899	-0.12051	-0.481052	-0.165483	0.75246	-0.105942	-0.687986	-0.189257	-0.129788	-0.0888071		0.707617	-0.0571448	0.150655	-0.283223	0.342982	-0.0103146	-1.3499	0.734108	0.132285	-0.839761	2.18803	1.6924	0.0273324	0.108861	0.29188	0.971543	0.189928	-0.693012	0.993088	-0.0139273	-0.355676	-1.07187	-0.760996	0.747066	-0.11714	-0.42
-13.1464		0.145019	-0.341453	-0.0328975	0.323893	-0.79502	-0.268296	0.0546419	-0.0658946	-0.111743	-0.243488	-0.760051	0.658703	-0.0187634	-0.50931	-0.224869	0.778495	-0.200581	-0.68558	-0.259832	-0.199648	-0.101795		0.689215	-0.115221	0.257445	-0.154869	0.267923	-0.0485517	-1.38677	0.698336	0.113368	-0.862124	2.06473	1.6121	0.00383085	0.171684	0.374267	1.02299	0.132688	-0.631424	1.05978	0.0220666	-0.354979	-1.13654	-0.617273	0.726523	-0.17834	-0.45692
-13.0962		0.293991	-0.371334	0.0898856	0.448447	-0.794679	-0.257978	0.0581069	-0.0419447	-0.0978064	-0.275722	-0.78798	0.620489	-0.00863956	-0.665768	-0.163465	0.785532	-0.203552	-0.692604	-0.319747	-0.160753	-0.242356		0.793462	-0.155873	0.270711	-0.00789718	0.221973	-0.0361266	-1.37612	0.609705	0.0991088	-0.817871	1.7858	1.52068	-0.0414933	0.14654	0.461284	0.935908	0.0189439	-0.531333	1.11334	-0.0035388	-0.276645	-1.24235	-0.574127	0.735012	-0.19623	-0.48733
-13.0461		0.463261	-0.443592	0.217768	0.444421	-0.684117	-0.27506	0.0846594	-0.020257	-0.0829745	-0.289424	-0.767827	0.651456	-0.163462	-0.768126	0.041075	0.740359	-0.186358	-0.696866	-0.364707	0.00973922	-0.380252		0.903991	-0.144238	0.250003	0.206673	0.237012	0.0193722	-1.3319	0.547018	0.0677847	-0.66814	1.499	1.45559	-0.0758445	0.106728	0.538902	0.693282	-0.156259	-0.490525	1.13567	-0.0558497	-0.0274043	-1.31015	-0.703455	0.616917	-0.09464	-0.53503
-12.9959		0.606779	-0.472774	0.271011	0.432124	-0.567327	-0.288907	0.0902414	-0.0254329	-0.0789623	-0.266874	-0.761584	0.770427	-0.385652	-0.7081	0.215024	0.678773	-0.216039	-0.65861	-0.369469	0.257025	-0.447111		0.92438	-0.0990209	0.250083	0.434511	0.29204	0.107009	-1.29163	0.538768	0.0354063	-0.422069	1.31229	1.41619	-0.0936647	0.135158	0.593022	0.430063	-0.266241	-0.561219	1.14941	-0.0911911	0.327736	-1.32049	-0.807503	0.414622	0.087361	-0.59231
-12.9457		0.65444	-0.439045	0.257822	0.483149	-0.593512	-0.287412	0.0536771	-0.0557946	-0.0730435	-0.185214	-0.81491	0.877346	-0.542224	-0.576032	0.226658	0.647196	-0.256341	-0.569347	-0.324461	0.48349	-0.475454		0.861336	-0.025216	0.250655	0.597781	0.332181	0.191556	-1.27925	0.511304	0.0295595	-0.156834	1.18174	1.37159	-0.108798	0.199843	0.623271	0.232826	-0.236896	-0.693282	1.13485	-0.104617	0.653248	-1.31427	-0.746094	0.26395	0.207162	-0.64534
-12.8955		0.572971	-0.418829	0.237368	0.508215	-0.709861	-0.287625	-0.0155869	-0.0731475	-0.056333	-0.0806922	-0.856368	0.88641	-0.61502	-0.520459	0.126455	0.637489	-0.248962	-0.466751	-0.27586	0.596113	-0.501841		0.795238	0.064669	0.204164	0.713376	0.314704	0.206174	-1.29025	0.398076	0.0358358	0.0428578	1.02715	1.28559	-0.126587	0.218841	0.641975	0.0314968	-0.145634	-0.768033	1.06663	-0.127918	0.886521	-1.30087	-0.621706	0.185033	0.19216	-0.70504
-12.8453		0.431939	-0.456175	0.219001	0.406337	-0.761024	-0.31042	-0.0943539	-0.0553654	-0.046402	-0.0169202	-0.795243	0.838892	-0.66251	-0.572704	0.030228	0.610464	-0.20113	-0.384537	-0.279014	0.570162	-0.515296		0.769113	0.112617	0.101562	0.832456	0.263047	0.131187	-1.29539	0.247767	0.0159935	0.152158	0.882176	1.14826	-0.15066	0.193125	0.665929	-0.184114	-0.0832405	-0.711834	1.00386	-0.198719	1.02052	-1.25313	-0.579376	0.126444	0.144701	-0.77062
-12.7952		0.372755	-0.501802	0.167785	0.238139	-0.744642	-0.33997	-0.154144	-0.0280579	-0.0581887	0.0100157	-0.685726	0.82608	-0.709197	-0.655708	-0.0302507	0.556462	-0.148071	-0.312966	-0.317557	0.488023	-0.503585		0.738571	0.0736811	-0.0270894	0.938113	0.260388	0.0432286	-1.26613	0.159793	-0.0294404	0.196388	0.853283	0.979499	-0.19986	0.194816	0.700954	-0.209714	-0.0220826	-0.576913	1.03305	-0.308021	1.02781	-1.17758	-0.595549	0.116965	0.213263	-0.79912
-12.745		0.461877	-0.503183	0.0985793	0.162897	-0.76303	-0.334472	-0.172695	-0.0239556	-0.0742215	0.0847173	-0.656593	0.859654	-0.735691	-0.701192	-0.0922043	0.493104	-0.105638	-0.227875	-0.324963	0.470391	-0.501145		0.654077	-0.0158976	-0.143076	0.99186	0.340043	0.0305195	-1.21577	0.149773	-0.0586383	0.207863	0.979004	0.80642	-0.286481	0.251957	0.73236	0.0829638	0.0890438	-0.478793	1.12148	-0.375308	0.909368	-1.10965	-0.548827	0.196958	0.389785	-0.76593
-12.6948		0.600293	-0.476524	0.0825396	0.224259	-0.790344	-0.287888	-0.155399	-0.0429485	-0.0667653	0.25351	-0.691387	0.876716	-0.734144	-0.69306	-0.163681	0.422444	-0.0992231	-0.14195	-0.290238	0.544217	-0.564411		0.551949	-0.0892069	-0.219673	1.01965	0.404416	0.0832244	-1.19813	0.150131	-0.0460641	0.217657	1.19614	0.65504	-0.384174	0.316989	0.746755	0.440965	0.189733	-0.457713	1.12901	-0.3305	0.761657	-1.03609	-0.411315	0.274861	0.516952	-0.71953
-12.6446		0.639116	-0.462435	0.140625	0.288442	-0.704248	-0.241561	-0.136398	-0.0708388	-0.0345551	0.428103	-0.637649	0.836501	-0.718167	-0.62899	-0.197126	0.331585	-0.16404	-0.100045	-0.273898	0.62443	-0.697708		0.511706	-0.143846	-0.261797	1.0679	0.337234	0.11553	-1.23752	0.120591	-0.0104844	0.24915	1.41935	0.54597	-0.442954	0.341742	0.759517	0.514262	0.199464	-0.44653	0.992489	-0.227956	0.691892	-0.895723	-0.297541	0.242053	0.504675	-0.71557
-12.5945		0.560901	-0.466877	0.200782	0.230917	-0.518647	-0.213151	-0.146736	-0.102115	-0.000467857	0.482358	-0.45676	0.76489	-0.691163	-0.515398	-0.15245	0.222918	-0.275966	-0.125356	-0.296884	0.648859	-0.81768		0.547531	-0.230632	-0.312441	1.11789	0.190614	0.0843352	-1.28285	0.0824499	0.00946553	0.286408	1.60583	0.46805	-0.436485	0.328599	0.791349	0.35783	0.189766	-0.384995	0.813336	-0.199195	0.70173	-0.681689	-0.332477	0.171754	0.448247	-0.73084
-12.5443		0.471858	-0.469875	0.196986	0.111134	-0.384801	-0.163759	-0.184606	-0.123247	0.0148844	0.4315	-0.300589	0.712898	-0.639824	-0.404147	-0.0645008	0.105956	-0.352535	-0.193457	-0.287187	0.665168	-0.824149		0.606036	-0.360685	-0.412055	1.11716	0.150386	0.0380589	-1.27408	0.0508244	-0.0161873	0.285281	1.75154	0.383846	-0.382805	0.3056	0.821684	0.325627	0.316085	-0.324578	0.712409	-0.272291	0.728841	-0.482494	-0.497797	0.202919	0.478103	-0.70474
-12.4941		0.434573	-0.45715	0.154213	0.0830368	-0.361342	-0.0691136	-0.220925	-0.108438	0.00772459	0.413907	-0.276047	0.688619	-0.564731	-0.363313	-0.0275486	-0.0268416	-0.358906	-0.266173	-0.185159	0.731885	-0.718235		0.66603	-0.473654	-0.539442	1.06558	0.288624	0.0337507	-1.23466	0.00726079	-0.0889099	0.243655	1.85617	0.293846	-0.322589	0.290456	0.806494	0.51437	0.594469	-0.386741	0.665003	-0.337292	0.758632	-0.385141	-0.64277	0.278145	0.566828	-0.63199
-12.4439		0.404321	-0.426721	0.131525	0.182058	-0.351648	0.0335187	-0.229651	-0.0570996	-0.00616946	0.485981	-0.283142	0.636261	-0.503457	-0.376849	-0.0900176	-0.175385	-0.341182	-0.333165	-0.043375	0.795403	-0.611407		0.767766	-0.501418	-0.613438	1.0057	0.465509	0.0448938	-1.24152	-0.050682	-0.16619	0.221171	1.90222	0.244092	-0.283627	0.284121	0.743229	0.664703	0.877013	-0.612376	0.555576	-0.32959	0.821516	-0.383228	-0.661849	0.22671	0.56687	-0.55253
-12.3937		0.336694	-0.38216	0.132039	0.312364	-0.281164	0.113841	-0.209859	-0.00761035	0.0021959	0.552297	-0.18743	0.504157	-0.505564	-0.330777	-0.183605	-0.2949	-0.324578	-0.408305	0.0423218	0.755152	-0.591422		0.914161	-0.442206	-0.575795	0.949062	0.530444	-0.000710519	-1.31208	-0.0936259	-0.190145	0.263362	1.86896	0.228853	-0.261957	0.27232	0.673036	0.613818	1.04086	-0.870225	0.361361	-0.332832	0.910512	-0.412204	-0.606513	0.0798074	0.398161	-0.48482
-12.3436		0.2609	-0.329514	0.126329	0.420467	-0.195149	0.200246	-0.182031	0.00786126	0.0494725	0.528056	-0.0288166	0.333535	-0.574962	-0.155953	-0.209088	-0.329727	-0.266706	-0.498266	0.0647436	0.62941	-0.62458		0.998821	-0.379443	-0.469566	0.873014	0.50635	-0.100442	-1.38608	-0.109497	-0.159188	0.346584	1.76032	0.171505	-0.236486	0.229217	0.617708	0.484341	1.08988	-0.964609	0.188878	-0.427752	0.965967	-0.422662	-0.579686	0.0421958	0.127692	-0.43085
-12.2934		0.210757	-0.282967	0.125639	0.541411	-0.15743	0.305761	-0.166493	-0.00201474	0.116571	0.451103	0.0741285	0.232427	-0.652395	0.0585638	-0.180122	-0.283233	-0.15671	-0.591539	0.0975878	0.559449	-0.63483		0.897914	-0.424963	-0.405681	0.77932	0.492721	-0.159182	-1.42278	-0.122093	-0.141695	0.42444	1.60411	0.0769159	-0.202462	0.140889	0.565387	0.372969	1.0867	-0.859451	0.120941	-0.546787	0.942212	-0.379082	-0.592192	0.133531	-0.10486	-0.41073
-12.2432		0.156505	-0.271277	0.161111	0.663632	-0.164139	0.369037	-0.16632	-0.0134458	0.165996	0.392005	0.139199	0.249038	-0.678543	0.168184	-0.204544	-0.212934	-0.0692877	-0.67221	0.166791	0.626761	-0.631436		0.636661	-0.600463	-0.431509	0.693733	0.490422	-0.116133	-1.44651	-0.150152	-0.187416	0.490229	1.43085	0.101433	-0.177516	0.0302046	0.521314	0.199054	1.0853	-0.718523	0.114412	-0.579322	0.864885	-0.24533	-0.595828	0.134598	-0.19025	-0.43056
-12.193		0.0515855	-0.315174	0.207672	0.699929	-0.18914	0.343254	-0.170891	-0.0196037	0.181965	0.361012	0.281297	0.330007	-0.666977	0.159515	-0.315915	-0.15515	-0.0589078	-0.726807	0.204271	0.74312	-0.68132		0.412266	-0.769412	-0.46747	0.605524	0.434844	-0.0245795	-1.47919	-0.186284	-0.258843	0.562266	1.27432	0.352802	-0.168313	-0.0584788	0.512884	-0.0415524	1.1104	-0.652036	0.0848332	-0.538711	0.812379	-0.0363903	-0.58975	-0.0397081	-0.12354	-0.45095
-12.1429		-0.0964313	-0.384125	0.20079	0.641617	-0.240193	0.287786	-0.174182	-0.0203272	0.176456	0.33856	0.496498	0.42082	-0.685373	0.14679	-0.412227	-0.0974803	-0.0835912	-0.740303	0.15836	0.768481	-0.776414		0.402029	-0.75398	-0.424008	0.477092	0.330574	0.0384111	-1.49812	-0.218527	-0.285887	0.634505	1.17142	0.701566	-0.149906	-0.105895	0.527553	-0.189783	1.12663	-0.533097	0.0142848	-0.51291	0.826545	0.150246	-0.604507	-0.187432	-0.01439	-0.44415
-12.0927		-0.237142	-0.408727	0.134403	0.606775	-0.337785	0.291105	-0.185261	-0.00741648	0.162375	0.302498	0.647797	0.528394	-0.760447	0.196991	-0.394599	-0.0308538	-0.0987344	-0.705774	0.0957325	0.683938	-0.820949		0.556873	-0.546668	-0.345007	0.341173	0.238008	0.073893	-1.49318	-0.234619	-0.254801	0.677251	1.11891	0.922082	-0.0898578	-0.135115	0.50184	-0.218242	1.07083	-0.221727	-0.0768955	-0.507716	0.850202	0.219538	-0.62406	-0.15957	0.031739	-0.442
-12.0425		-0.331608	-0.361324	0.0798729	0.671452	-0.468927	0.343574	-0.215132	0.0199533	0.145577	0.212233	0.676597	0.642353	-0.82961	0.26117	-0.288672	0.0218107	-0.138232	-0.641093	0.135635	0.586914	-0.768531		0.643907	-0.334366	-0.344332	0.317538	0.172398	0.109691	-1.50274	-0.209543	-0.20382	0.684393	1.05367	0.957287	0.0233435	-0.174591	0.404692	-0.329198	0.978053	0.129194	-0.192037	-0.460431	0.798152	0.182166	-0.595103	-0.10217	0.057392	-0.47269
-11.9923		-0.374355	-0.289289	0.0859576	0.771503	-0.578439	0.362635	-0.253054	0.0453981	0.138106	0.0587113	0.680767	0.673954	-0.808331	0.288275	-0.182686	0.0494059	-0.218656	-0.578266	0.3022	0.547085	-0.690362		0.517325	-0.276844	-0.418777	0.466042	0.112976	0.117783	-1.54905	-0.133191	-0.161695	0.695156	0.932548	0.917651	0.181652	-0.22086	0.295064	-0.601764	0.994534	0.232002	-0.319208	-0.38704	0.687259	0.125485	-0.487677	-0.19782	0.182983	-0.50214
-11.9422		-0.385912	-0.244844	0.110805	0.838357	-0.614001	0.31613	-0.266705	0.0551553	0.14998	-0.0813606	0.737622	0.549458	-0.692983	0.304673	-0.109587	0.0788003	-0.246678	-0.532592	0.502914	0.542706	-0.662796		0.283635	-0.342001	-0.447583	0.66555	0.0652751	0.0718422	-1.58914	-0.048103	-0.132576	0.752218	0.806126	0.881536	0.365983	-0.255353	0.260471	-0.788936	1.17495	0.0861969	-0.387401	-0.399612	0.626671	0.0966252	-0.320474	-0.375274	0.379547	-0.50114
-11.892		-0.39945	-0.227347	0.0904165	0.920449	-0.593976	0.255369	-0.23768	0.0488707	0.168381	-0.138731	0.779344	0.323195	-0.561541	0.356313	-0.0483268	0.12652	-0.132374	-0.497228	0.653949	0.542543	-0.653369		0.142016	-0.410075	-0.388439	0.727382	0.0290022	0.0299969	-1.57854	-0.014037	-0.119153	0.846229	0.746682	0.835976	0.550087	-0.28343	0.313563	-0.661706	1.34745	-0.0339746	-0.347251	-0.557298	0.673532	0.0678042	-0.166593	-0.455852	0.454555	-0.51284
-11.8418		-0.436547	-0.220329	0.040079	1.08594	-0.601882	0.24262	-0.190052	0.0236636	0.169481	-0.163318	0.720752	0.127326	-0.460262	0.466742	-0.00288742	0.163436	0.0598058	-0.465892	0.762415	0.574468	-0.585527		0.126919	-0.448021	-0.335256	0.622888	-0.0348282	0.0581269	-1.54232	-0.0335179	-0.120165	0.928411	0.740695	0.777678	0.71891	-0.326936	0.377857	-0.37128	1.3043	-0.0203643	-0.269	-0.778045	0.784932	0.0142491	-0.12085	-0.426666	0.31769	-0.57823
-11.7916		-0.486993	-0.229843	0.0348565	1.28422	-0.672344	0.293982	-0.165685	-0.0257266	0.146709	-0.228913	0.611857	0.0281612	-0.338977	0.67323	-0.0182515	0.16227	0.187338	-0.440884	0.867907	0.667529	-0.470187		0.11664	-0.492594	-0.344253	0.511949	-0.11732	0.113503	-1.5313	-0.0549915	-0.116111	0.980735	0.739355	0.743311	0.882912	-0.381829	0.373938	-0.256778	1.08603	-0.054621	-0.282882	-0.92429	0.924667	-0.0363746	-0.188135	-0.396915	0.115209	-0.65051
-11.7414		-0.526145	-0.250875	0.0968774	1.38315	-0.726247	0.384631	-0.173648	-0.0798686	0.107218	-0.27605	0.569621	-0.0106023	-0.157748	0.993132	-0.114485	0.143925	0.226126	-0.421121	0.973552	0.773296	-0.387571		0.058469	-0.528331	-0.348007	0.528052	-0.120211	0.110549	-1.5442	-0.0495872	-0.0893821	1.03613	0.768078	0.74589	1.05149	-0.416493	0.299823	-0.405913	0.949508	-0.226221	-0.422377	-0.926124	1.11	-0.0600341	-0.237095	-0.408562	0.02365	-0.66808
-11.6913		-0.551217	-0.247081	0.159459	1.30808	-0.690446	0.483567	-0.185853	-0.0973189	0.0568522	-0.193842	0.618108	-0.040164	-0.0184528	1.31542	-0.23229	0.135497	0.279184	-0.405384	1.07912	0.807877	-0.357584		0.0308707	-0.493827	-0.303415	0.618027	-0.00066065	0.0657218	-1.55222	-0.0385478	-0.0554031	1.11362	0.867039	0.762858	1.20251	-0.416887	0.219304	-0.604316	1.04737	-0.339315	-0.583428	-0.810578	1.31674	-0.0924291	-0.167161	-0.44103	0.044358	-0.66067
-11.6411		-0.582136	-0.200445	0.164868	1.11105	-0.63225	0.585139	-0.182695	-0.0640486	0.01498	-0.0276996	0.68197	-0.0706617	-0.0747114	1.44767	-0.262608	0.112733	0.398385	-0.404921	1.22756	0.755581	-0.321138		0.0603927	-0.393238	-0.282553	0.638165	0.126836	0.0623537	-1.572	-0.0382939	-0.0510593	1.17601	0.960729	0.772122	1.30864	-0.401688	0.184403	-0.659224	1.2444	-0.231175	-0.656484	-0.66636	1.44691	-0.18201	-0.0760602	-0.501054	0.081748	-0.69117
-11.5909		-0.629065	-0.139371	0.145532	0.938606	-0.665955	0.696639	-0.174835	-0.0172857	0.018721	0.049303	0.700669	-0.105705	-0.294927	1.34837	-0.147791	0.0315432	0.506111	-0.42617	1.46235	0.672661	-0.255856		0.0433822	-0.307128	-0.334722	0.543051	0.142205	0.0961357	-1.64197	-0.0240418	-0.0890981	1.17962	0.927565	0.756168	1.3798	-0.38622	0.185998	-0.592455	1.29716	-0.0031491	-0.661948	-0.594196	1.45219	-0.316399	-0.127554	-0.580838	0.091404	-0.73859
-11.5407		-0.67967	-0.0908	0.160498	0.930231	-0.756496	0.77746	-0.172962	0.000680162	0.0731545	-0.0252379	0.674171	-0.162862	-0.448494	1.2142	0.0391989	-0.100262	0.51517	-0.44161	1.76547	0.59768	-0.217275		-0.0669902	-0.275332	-0.38624	0.416254	0.0837456	0.077126	-1.73548	0.0320555	-0.138338	1.12977	0.78011	0.713567	1.44123	-0.365434	0.1797	-0.530886	1.14196	0.217673	-0.714859	-0.632468	1.40187	-0.442586	-0.294244	-0.620249	0.060516	-0.73847
-11.4906		-0.716807	-0.0465582	0.193272	1.09118	-0.751638	0.736655	-0.167168	-0.00711688	0.120108	-0.131025	0.61711	-0.228915	-0.401767	1.2416	0.142592	-0.223869	0.439192	-0.408946	2.07053	0.52604	-0.238823		-0.147578	-0.238554	-0.367062	0.345088	0.0463051	-0.0192998	-1.77088	0.115444	-0.158198	1.06164	0.633439	0.689174	1.48378	-0.34247	0.141068	-0.561077	0.927676	0.473878	-0.857135	-0.706547	1.36427	-0.534016	-0.386761	-0.616938	-0.03744	-0.70218
-11.4404		-0.729454	0.000458404	0.188525	1.26846	-0.621039	0.558869	-0.153024	-0.0104873	0.101812	-0.15514	0.530739	-0.247686	-0.305461	1.37728	0.0799237	-0.289595	0.344242	-0.325813	2.30851	0.476933	-0.280064		-0.105056	-0.136649	-0.325937	0.320744	0.0174042	-0.117023	-1.71958	0.182017	-0.144882	0.999812	0.512212	0.71813	1.48212	-0.339114	0.0838004	-0.703181	0.797728	0.750776	-0.97807	-0.700526	1.30182	-0.590614	-0.314111	-0.672458	-0.17189	-0.69161
-11.3902		-0.710971	0.0291548	0.171235	1.30945	-0.527311	0.396171	-0.151439	-0.00428328	0.0375012	-0.136045	0.420345	-0.19494	-0.372743	1.41689	-0.068074	-0.278088	0.252395	-0.235048	2.42915	0.503778	-0.314857		-0.0538917	-0.0200448	-0.332539	0.263581	-0.054025	-0.159444	-1.64335	0.205021	-0.126126	0.952386	0.344169	0.732241	1.45439	-0.364658	0.0360555	-0.898685	0.754107	0.820128	-0.947052	-0.597016	1.16355	-0.609908	-0.162399	-0.814472	-0.23359	-0.69782
-11.34		-0.66952	0.0268741	0.229505	1.22632	-0.600834	0.428125	-0.179808	-0.0141656	-0.00787765	-0.168524	0.312745	-0.126901	-0.577658	1.30939	-0.162384	-0.172173	0.144488	-0.166303	2.43259	0.604051	-0.381914		-0.127948	0.00287801	-0.364651	0.126734	-0.125435	-0.161747	-1.60873	0.198341	-0.111986	0.908178	0.134816	0.64258	1.45385	-0.405489	0.0156991	-0.990511	0.770473	0.556989	-0.787912	-0.493452	1.0158	-0.61931	-0.0312613	-0.874815	-0.16696	-0.64819
-11.2899		-0.636873	0.0257939	0.359506	1.13604	-0.752176	0.624665	-0.220038	-0.0550618	-0.0119798	-0.251575	0.256948	-0.10804	-0.725934	1.2361	-0.184542	0.0448961	0.0275526	-0.109172	2.39777	0.689376	-0.490007		-0.226103	-0.0765762	-0.376068	-0.0334694	-0.14018	-0.137235	-1.61956	0.194283	-0.0805826	0.834622	-0.0198042	0.530651	1.4963	-0.453704	0.0230715	-0.82363	0.904078	0.216511	-0.647194	-0.468767	0.975518	-0.692013	0.0613923	-0.692426	-0.05123	-0.52945
-11.2397		-0.644013	0.0808029	0.43176	1.07167	-0.8039	0.752168	-0.235945	-0.110281	-0.0049499	-0.305463	0.294924	-0.123706	-0.742968	1.36631	-0.244322	0.347933	-0.0531797	-0.0634264	2.41166	0.69177	-0.558849		-0.152382	-0.136863	-0.385654	-0.108245	-0.148411	-0.0758858	-1.65186	0.200902	-0.0250635	0.721025	-0.103589	0.590046	1.53861	-0.510192	0.0391285	-0.418635	1.1574	0.143502	-0.60698	-0.502066	1.03516	-0.850526	0.11654	-0.372813	0.009915	-0.41376
-11.1895		-0.690961	0.218814	0.371092	0.957742	-0.743452	0.651748	-0.214114	-0.15704	-0.00834999	-0.306458	0.400351	-0.121267	-0.711428	1.63014	-0.39421	0.657182	-0.0716055	-0.0674254	2.44819	0.638092	-0.533868		0.063753	-0.0807634	-0.415216	-0.0648403	-0.204237	-0.0123827	-1.69977	0.191818	0.0199524	0.61548	-0.200294	0.824075	1.54081	-0.551586	0.0296592	0.0270905	1.32085	0.343367	-0.621375	-0.541836	1.05621	-0.997761	0.123986	-0.177522	0.013285	-0.3576
-11.1393		-0.75962	0.405654	0.277485	0.770191	-0.725829	0.423083	-0.175258	-0.191493	-0.0152258	-0.330132	0.470724	-0.112006	-0.676376	1.79608	-0.521928	0.895057	-0.0552571	-0.127936	2.39642	0.570892	-0.490081		0.218804	0.0549995	-0.417589	0.0162792	-0.229854	-0.0154196	-1.75835	0.150618	0.025931	0.565069	-0.325628	0.985571	1.51429	-0.536245	-0.0300547	0.348466	1.16912	0.565067	-0.637151	-0.57797	0.953447	-1.03397	0.105711	-0.169432	0.026161	-0.34437
-11.0891		-0.84334	0.551925	0.276584	0.612555	-0.8368	0.274165	-0.150982	-0.215341	-0.0219865	-0.443435	0.437436	-0.155822	-0.612363	1.7308	-0.502014	1.05155	-0.0493252	-0.161907	2.23288	0.465345	-0.53037		0.274149	0.193549	-0.355066	0.0564668	-0.13526	-0.08192	-1.80479	0.108736	0.0138046	0.540989	-0.399108	0.904566	1.48921	-0.457149	-0.127107	0.547656	0.800995	0.685994	-0.663748	-0.60919	0.80061	-0.994282	0.110583	-0.143121	0.090673	-0.32806
-11.039		-0.933034	0.575654	0.323187	0.598466	-0.977586	0.262329	-0.152564	-0.213391	-0.0340641	-0.604402	0.36215	-0.248194	-0.563968	1.5135	-0.39219	1.17887	-0.072657	-0.0831574	2.06499	0.294903	-0.631411		0.397863	0.33128	-0.292616	0.0744205	0.00160847	-0.131072	-1.82683	0.107078	0.0159277	0.494487	-0.409082	0.687781	1.45974	-0.350466	-0.220159	0.683576	0.551998	0.776356	-0.68935	-0.608133	0.717531	-0.969001	0.170761	0.0477392	0.194438	-0.27461
-10.9888		-0.982753	0.487268	0.273469	0.72457	-1.02576	0.272738	-0.155833	-0.167673	-0.0436631	-0.715408	0.354524	-0.308285	-0.617048	1.29905	-0.362588	1.32492	-0.126543	0.0694448	1.96054	0.120137	-0.686135		0.65127	0.473693	-0.322248	0.127917	0.0340049	-0.132443	-1.83893	0.129402	0.022315	0.456008	-0.446859	0.487163	1.39311	-0.24137	-0.28195	0.732506	0.539066	0.856608	-0.643306	-0.563659	0.724904	-0.944286	0.295026	0.262659	0.292717	-0.16614
-10.9386		-0.930375	0.386515	0.114185	0.882163	-1.00131	0.21619	-0.122357	-0.0920948	-0.0399797	-0.752557	0.415941	-0.299983	-0.72304	1.1447	-0.451501	1.48535	-0.210692	0.171641	1.85146	0.0243947	-0.665551		0.873502	0.554657	-0.419588	0.228901	-0.0270099	-0.150732	-1.84974	0.118099	0.00631486	0.480835	-0.531796	0.282105	1.28927	-0.124799	-0.319646	0.65528	0.543057	0.834136	-0.516302	-0.510275	0.761891	-0.848524	0.454766	0.283358	0.339109	-0.01947
-10.8884		-0.768655	0.342354	-0.0117132	0.94755	-0.994241	0.138635	-0.0467291	-0.0299128	-0.0375251	-0.78371	0.448252	-0.276699	-0.740746	1.02086	-0.526711	1.61483	-0.290837	0.179974	1.68059	-0.00589538	-0.641032		0.942203	0.545913	-0.458405	0.368724	-0.0404113	-0.223659	-1.84565	0.0590883	-0.016269	0.521627	-0.548257	0.0467132	1.20056	-0.0100585	-0.351475	0.529866	0.408425	0.696351	-0.426888	-0.483987	0.784738	-0.710952	0.556255	0.118813	0.328624	0.107764
-10.8383		-0.575204	0.311397	-0.00857808	0.862119	-1.01272	0.113071	0.0308158	-0.00787304	-0.0603793	-0.85915	0.403056	-0.269776	-0.66634	0.938426	-0.503887	1.66343	-0.2894	0.17436	1.52463	-0.053593	-0.659288		0.94185	0.562851	-0.37563	0.549868	0.0391241	-0.281782	-1.82747	0.00435111	-0.00315068	0.477451	-0.424018	-0.0767909	1.17137	0.068239	-0.383849	0.488419	0.281603	0.588127	-0.473175	-0.486353	0.784098	-0.635239	0.510687	-0.0482444	0.314123	0.181256
-10.7881		-0.449707	0.221497	0.0637674	0.674933	-1.00417	0.116478	0.0753383	-0.00998131	-0.101087	-0.946132	0.327423	-0.232179	-0.639491	0.961822	-0.454697	1.60344	-0.180449	0.226254	1.46247	-0.142017	-0.686091		0.988052	0.704287	-0.258249	0.730046	0.10598	-0.247834	-1.82995	-0.00222296	0.0404297	0.366313	-0.259737	0.0126665	1.17441	0.105272	-0.417687	0.543128	0.322208	0.630094	-0.580649	-0.505634	0.753298	-0.641704	0.360926	-0.130335	0.344285	0.249224
-10.7379		-0.417535	0.0910374	0.109854	0.503116	-0.966223	0.0825331	0.0978387	-0.00687742	-0.125837	-0.991199	0.261099	-0.156444	-0.708193	1.0818	-0.440454	1.45073	-0.0727227	0.314125	1.42237	-0.211439	-0.678774		1.06149	0.853334	-0.230466	0.820212	0.071045	-0.148467	-1.87534	0.0243599	0.0483398	0.318923	-0.208408	0.152102	1.13803	0.142519	-0.454404	0.588234	0.431641	0.745659	-0.603365	-0.531282	0.704072	-0.662773	0.253136	-0.186027	0.390911	0.386196
-10.6877		-0.410998	-0.00651891	0.118464	0.412084	-0.927549	0.0246276	0.117932	0.00658304	-0.120661	-0.992431	0.190642	-0.145358	-0.772483	1.17659	-0.387901	1.26974	-0.104683	0.395242	1.28892	-0.220044	-0.636138		1.11396	0.817712	-0.294429	0.810521	-0.026868	-0.0644229	-1.93034	0.0516704	-0.0256737	0.380921	-0.298755	0.130738	1.03526	0.202107	-0.485795	0.56896	0.438266	0.732182	-0.540339	-0.541505	0.675353	-0.667982	0.260738	-0.257084	0.385613	0.584164
-10.6375		-0.364958	-0.0588082	0.118401	0.360135	-0.8582	0.0192025	0.116198	0.017166	-0.107375	-0.976448	0.12941	-0.267505	-0.779902	1.16478	-0.239792	1.12958	-0.251683	0.472925	1.08435	-0.199612	-0.56072		1.19157	0.627715	-0.342638	0.805943	-0.0823644	-0.020736	-1.93983	0.0762265	-0.13849	0.444505	-0.436264	0.0124733	0.914561	0.250394	-0.499525	0.537605	0.353305	0.49368	-0.531119	-0.522226	0.677983	-0.672107	0.319648	-0.317119	0.334437	0.745501
-10.5874		-0.313028	-0.104127	0.104697	0.295292	-0.710195	0.0718021	0.0694448	0.018346	-0.110489	-0.944301	0.141821	-0.423318	-0.791772	1.12313	-0.10975	1.04277	-0.336041	0.547715	0.912886	-0.200444	-0.436501		1.34089	0.50226	-0.319991	0.855606	-0.0240645	0.0105645	-1.89197	0.101383	-0.198222	0.412105	-0.528285	0.0162252	0.836362	0.258294	-0.50163	0.541066	0.284548	0.178633	-0.631599	-0.501383	0.683244	-0.651767	0.341933	-0.357742	0.340398	0.782898
-10.5372		-0.33944	-0.130368	0.0675592	0.248431	-0.532645	0.0821893	0.00907224	0.00851084	-0.127146	-0.876514	0.232329	-0.462936	-0.828985	1.16801	-0.147145	0.972799	-0.255066	0.578059	0.793064	-0.230425	-0.268188		1.49233	0.525838	-0.296212	0.849082	0.133484	0.0382061	-1.82614	0.110694	-0.171829	0.316355	-0.558127	0.163317	0.810594	0.253979	-0.508543	0.56923	0.255939	0.0601751	-0.714304	-0.517433	0.704408	-0.580689	0.300132	-0.398388	0.469324	0.694305
-10.487		-0.441275	-0.0926319	0.0302958	0.268559	-0.444756	-0.0188467	-0.0131154	-0.022086	-0.133885	-0.766783	0.290971	-0.379048	-0.832132	1.27979	-0.321327	0.903156	-0.101045	0.550204	0.682515	-0.260286	-0.0991274		1.54155	0.548349	-0.343515	0.68389	0.287639	0.0500037	-1.78414	0.0973285	-0.123163	0.232558	-0.563693	0.27638	0.80832	0.273682	-0.512152	0.623831	0.241235	0.255791	-0.650565	-0.554644	0.801157	-0.522333	0.196862	-0.436899	0.62103	0.545923
-10.4368		-0.518678	-0.0274007	0.00427901	0.322937	-0.478828	-0.152769	-0.0041724	-0.0763241	-0.112965	-0.627445	0.226669	-0.28469	-0.808162	1.34899	-0.471881	0.851009	-0.00911076	0.532368	0.608946	-0.257728	0.0263674		1.49359	0.440389	-0.417515	0.439112	0.331156	0.0635729	-1.77387	0.0853502	-0.127981	0.17257	-0.583811	0.285584	0.803834	0.294399	-0.485784	0.708244	0.234487	0.586823	-0.505025	-0.563817	0.944471	-0.559079	0.0502925	-0.47239	0.602376	0.410682
-10.3867		-0.524533	-0.0312919	-0.0404128	0.337929	-0.521877	-0.18045	-0.0151088	-0.12926	-0.0715726	-0.487053	0.10296	-0.251446	-0.841919	1.35077	-0.517998	0.802886	0.0215214	0.592865	0.626265	-0.214985	0.0915402		1.44694	0.28787	-0.431945	0.266067	0.275974	0.113322	-1.7774	0.0871246	-0.176294	0.120879	-0.625393	0.314627	0.786549	0.268418	-0.432117	0.724947	0.184836	0.75662	-0.455901	-0.54737	0.990336	-0.636336	-0.0642691	-0.516245	0.352725	0.32236
-10.3365		-0.529196	-0.102842	-0.110415	0.296753	-0.451292	-0.0948544	-0.0523863	-0.149346	-0.0403873	-0.391214	0.0567193	-0.260128	-0.918139	1.34862	-0.498546	0.70689	0.0874087	0.698992	0.676561	-0.163033	0.105312		1.45547	0.260318	-0.395014	0.187905	0.239269	0.184813	-1.77859	0.0731101	-0.192783	0.0929373	-0.6701	0.456215	0.753918	0.209638	-0.386316	0.528473	-0.00177039	0.650439	-0.559191	-0.5577	0.88474	-0.59468	-0.0247839	-0.534508	0.037839	0.272737
-10.2863		-0.585904	-0.119712	-0.144514	0.230236	-0.300822	-0.0542314	-0.0670902	-0.140496	-0.0459367	-0.36205	0.10752	-0.266853	-0.900199	1.35207	-0.462117	0.568768	0.233473	0.765531	0.639124	-0.141377	0.1066		1.46062	0.381474	-0.378682	0.126814	0.277997	0.215949	-1.77872	0.0222009	-0.141061	0.0965248	-0.707498	0.646686	0.711604	0.189279	-0.361941	0.139371	-0.29604	0.406542	-0.6918	-0.596285	0.784777	-0.37465	0.244993	-0.493583	-0.14028	0.247491
-10.2361		-0.631506	-0.0229055	-0.0803058	0.153361	-0.241467	-0.19067	-0.0380283	-0.138103	-0.0774622	-0.348317	0.131975	-0.241899	-0.752903	1.31282	-0.437299	0.486406	0.422407	0.785604	0.498106	-0.133465	0.152329		1.37354	0.502037	-0.392602	0.0591819	0.321254	0.180229	-1.78625	-0.0307977	-0.0648628	0.0939812	-0.75087	0.798463	0.670656	0.238262	-0.338945	-0.224062	-0.488094	0.206362	-0.733914	-0.586603	0.850312	-0.103826	0.686278	-0.485543	-0.18142	0.251391
-10.186		-0.60019	0.0773912	0.0795743	0.074674	-0.369575	-0.439507	-0.00582086	-0.158726	-0.0933518	-0.279552	0.0305624	-0.185064	-0.645252	1.25905	-0.455555	0.523046	0.608933	0.838773	0.337608	-0.0712327	0.256065		1.20618	0.465662	-0.39381	0.0202977	0.302843	0.125736	-1.7911	-0.0420052	-0.0238324	0.0573176	-0.81373	0.909851	0.638991	0.304047	-0.317021	-0.398502	-0.38884	0.076471	-0.71126	-0.486244	1.00941	0.0472893	1.10536	-0.626998	-0.2452	0.283459
-10.1358		-0.54428	0.0545564	0.301383	0.0275464	-0.55707	-0.61788	-0.00641632	-0.176059	-0.0718088	-0.186132	-0.147392	-0.152963	-0.745163	1.2798	-0.491853	0.599481	0.773694	0.96247	0.195749	0.0614247	0.357942		1.08125	0.262266	-0.392144	0.00625636	0.255928	0.103713	-1.76353	-0.0229095	-0.0278473	0.0186808	-0.886082	0.992949	0.622767	0.328803	-0.324057	-0.443955	-0.0323708	-0.0698663	-0.708207	-0.365963	1.07403	0.0431724	1.31007	-0.808164	-0.40107	0.312089
-10.0856		-0.540338	-0.0510011	0.55721	0.0298806	-0.594299	-0.643511	-0.0201558	-0.157178	-0.0411321	-0.180146	-0.266384	-0.210623	-1.00158	1.34952	-0.452673	0.58542	0.899399	1.08901	0.0512992	0.184721	0.402391		1.07927	0.023495	-0.429132	-0.0188413	0.219229	0.096669	-1.69658	-0.011038	-0.0437381	0.0187469	-0.948499	1.01106	0.625045	0.326282	-0.349271	-0.488649	0.365893	-0.264418	-0.718829	-0.321972	1.01319	-0.0121406	1.30019	-0.784376	-0.54626	0.311355
-10.0354		-0.548503	-0.0929394	0.784652	0.0432204	-0.460746	-0.605428	-0.0124239	-0.106795	-0.0419758	-0.281949	-0.25164	-0.317306	-1.2035	1.32273	-0.330353	0.453999	0.967588	1.14377	-0.0646486	0.241712	0.417841		1.11387	-0.110588	-0.471601	-0.0602982	0.155852	0.0626498	-1.63462	-0.00806798	-0.0353408	0.0328098	-0.994621	0.954866	0.628696	0.339706	-0.331663	-0.533668	0.609696	-0.438607	-0.674115	-0.349668	0.952342	-0.0191959	1.26744	-0.571587	-0.58758	0.301488
-9.98525		-0.477666	-0.0252194	0.884155	0.0278004	-0.33151	-0.622672	0.0103912	-0.0622308	-0.0718658	-0.368804	-0.147489	-0.344347	-1.20691	1.16008	-0.269058	0.272304	0.98169	1.14389	-0.0794325	0.302647	0.461307		1.03016	-0.0984165	-0.451626	-0.123946	0.0404507	0.0218139	-1.62703	-0.0023124	0.00925909	-0.00953583	-1.02011	0.894951	0.603846	0.358408	-0.253196	-0.517319	0.666471	-0.535596	-0.580996	-0.363373	0.946239	0.0143759	1.33923	-0.474107	-0.57812	0.309524
-9.93507		-0.337695	0.0490147	0.82452	0.0170646	-0.312864	-0.703325	0.0130479	-0.0516204	-0.0912415	-0.358339	-0.043211	-0.25066	-1.06192	1.01837	-0.348295	0.0900258	0.962427	1.14718	-0.00678821	0.464992	0.513256		0.805687	0.0173345	-0.399437	-0.248259	-0.0651126	0.0320541	-1.66281	-0.0183616	0.061849	-0.139728	-1.00681	0.885203	0.55812	0.335312	-0.183037	-0.46876	0.647837	-0.585299	-0.531208	-0.319679	0.918958	0.033822	1.42131	-0.624865	-0.62094	0.313935
-9.88489		-0.214039	0.0361432	0.694131	0.0827312	-0.330214	-0.764302	-0.0191481	-0.0689845	-0.0796666	-0.32708	0.0299429	-0.144494	-0.944407	1.0353	-0.418293	-0.0684704	0.913878	1.15303	0.0514847	0.695611	0.502088		0.566231	0.164238	-0.400698	-0.417442	-0.102907	0.0848301	-1.69178	-0.070772	0.0651134	-0.311966	-0.951979	0.873165	0.549497	0.270709	-0.180139	-0.46391	0.655019	-0.635059	-0.56457	-0.261932	0.834133	0.0573	1.40685	-0.782914	-0.73408	0.285106
-9.83472		-0.127128	-0.0272157	0.583688	0.224435	-0.31351	-0.742855	-0.0636338	-0.0892887	-0.0595584	-0.346544	0.100593	-0.119243	-0.973821	1.14245	-0.313333	-0.146398	0.812123	1.12434	0.0427379	0.874602	0.42111		0.411056	0.246908	-0.425863	-0.517941	-0.109168	0.102528	-1.70426	-0.0946594	-0.00904487	-0.451791	-0.903762	0.77849	0.611011	0.214382	-0.207795	-0.486452	0.656632	-0.675737	-0.608968	-0.240286	0.784045	0.168576	1.40895	-0.725516	-0.86669	0.25674
-9.78454		-0.0245196	-0.0517591	0.476394	0.341209	-0.311299	-0.662567	-0.085674	-0.0967179	-0.0588617	-0.324246	0.16594	-0.13184	-1.07904	1.18144	-0.119293	-0.107551	0.640151	1.07677	0.00271779	0.963837	0.344117		0.319501	0.179758	-0.352501	-0.481477	-0.140772	0.0601399	-1.73712	-0.0149806	-0.113218	-0.530475	-0.918552	0.615414	0.694966	0.185973	-0.204966	-0.465967	0.566947	-0.693688	-0.575164	-0.235367	0.863884	0.395814	1.59129	-0.577194	-0.97513	0.280998
-9.73436		0.112013	-0.031757	0.323846	0.345518	-0.347138	-0.608111	-0.0700369	-0.0910915	-0.0721091	-0.165766	0.161508	-0.108489	-1.06584	1.10679	-0.0449909	-0.0320981	0.428176	1.06517	-0.046597	1.01834	0.312886		0.232049	-0.00272934	-0.175253	-0.395722	-0.18162	0.0357027	-1.79543	0.120912	-0.169574	-0.582767	-0.970149	0.463459	0.739881	0.157445	-0.193658	-0.4289	0.419851	-0.727632	-0.437012	-0.186392	1.0428	0.673395	1.86378	-0.570015	-1.03424	0.322631
-9.68418		0.251631	-0.0401235	0.16952	0.279641	-0.347617	-0.63796	-0.0318924	-0.0744857	-0.0724814	0.00346369	0.0567163	-0.0651643	-0.848601	0.977509	-0.119528	-0.0433272	0.241302	1.08704	-0.136139	1.04683	0.274747		0.122822	-0.118003	-0.0383292	-0.371159	-0.193906	0.0961923	-1.82452	0.180879	-0.159905	-0.653272	-0.953627	0.353236	0.758419	0.122959	-0.23971	-0.479954	0.355885	-0.78703	-0.203994	-0.07687	1.20692	0.937399	1.97554	-0.682987	-1.02384	0.28861
-9.63401		0.387911	-0.115306	0.101907	0.260849	-0.31315	-0.709254	-3.69353e-05	-0.0466071	-0.0510608	-0.0113694	-0.0798649	-0.0382144	-0.573653	0.83281	-0.206677	-0.133887	0.118405	1.07446	-0.270189	0.987644	0.167169		-0.0262348	-0.0103575	-0.00877938	-0.384757	-0.199402	0.195187	-1.78291	0.133013	-0.135495	-0.743001	-0.818869	0.260554	0.799074	0.120484	-0.333361	-0.621428	0.428788	-0.77947	0.0988935	0.0387009	1.2854	1.18087	1.869	-0.711873	-0.93914	0.181225
-9.58383		0.534671	-0.216748	0.113673	0.312504	-0.378144	-0.710313	0.0111543	-0.0157541	-0.0284732	-0.150846	-0.166518	0.010706	-0.457076	0.691013	-0.236456	-0.169968	0.0367477	0.992697	-0.397956	0.838392	0.0229124		-0.229725	0.268313	0.0408547	-0.369918	-0.234172	0.244624	-1.69974	0.0888748	-0.13798	-0.820369	-0.656071	0.185144	0.85292	0.162368	-0.38916	-0.715668	0.548346	-0.644789	0.395252	0.104203	1.2948	1.38814	1.72656	-0.5715	-0.79683	0.132302
-9.53365		0.663292	-0.284509	0.101383	0.333115	-0.576254	-0.59313	0.00956817	-0.000204134	-0.028509	-0.166881	-0.206046	0.113845	-0.536644	0.617822	-0.224904	-0.0781759	-0.050516	0.886572	-0.485712	0.693046	-0.0630605		-0.443454	0.519006	0.239879	-0.367905	-0.269279	0.242054	-1.63619	0.1275	-0.152404	-0.859804	-0.582522	0.151105	0.870865	0.204343	-0.366576	-0.668469	0.639885	-0.51406	0.584985	0.130155	1.27502	1.49982	1.681	-0.373301	-0.63898	0.234674
-9.48348		0.730041	-0.288604	0.0101702	0.26386	-0.720044	-0.445452	0.00635989	-0.00991118	-0.0506012	-0.0177521	-0.240697	0.186196	-0.653589	0.667549	-0.137464	0.0761764	-0.154398	0.817106	-0.544735	0.612591	-0.0662189		-0.571859	0.601618	0.515364	-0.45202	-0.249762	0.251898	-1.62152	0.18694	-0.150283	-0.838495	-0.570844	0.1476	0.853821	0.214444	-0.322456	-0.538449	0.724473	-0.571554	0.643721	0.154471	1.2197	1.50444	1.68495	-0.267994	-0.53834	0.404995
-9.4333		0.75452	-0.22606	-0.0963616	0.183128	-0.665869	-0.394368	0.00140082	-0.0351665	-0.0716896	0.0505152	-0.272802	0.113778	-0.657093	0.760738	0.0553585	0.215221	-0.242661	0.804584	-0.578815	0.554081	-0.073781		-0.563625	0.5201	0.682382	-0.574412	-0.187685	0.28608	-1.64353	0.19562	-0.139823	-0.720585	-0.484272	0.149495	0.852029	0.222503	-0.32182	-0.4123	0.794813	-0.768206	0.62694	0.154619	1.09995	1.50449	1.68582	-0.302454	-0.54008	0.479866
-9.38312		0.793971	-0.125555	-0.138862	0.167154	-0.544924	-0.463412	-0.00737412	-0.0607835	-0.0707236	-0.123967	-0.298092	-0.0665257	-0.553932	0.735023	0.232847	0.344267	-0.282666	0.842321	-0.579072	0.469221	-0.164029		-0.460504	0.359983	0.676285	-0.623537	-0.155043	0.287209	-1.67362	0.203083	-0.146988	-0.501611	-0.293938	0.178264	0.882822	0.267424	-0.34913	-0.29734	0.751011	-0.857137	0.564328	0.0712994	0.954454	1.60906	1.73467	-0.395477	-0.56949	0.411213
-9.33294		0.852028	-0.053201	-0.140311	0.170327	-0.55788	-0.565346	-0.0133272	-0.0830709	-0.0502843	-0.400351	-0.3515	-0.183074	-0.458677	0.553943	0.243984	0.479743	-0.276322	0.909514	-0.577877	0.387538	-0.298566		-0.341128	0.228884	0.596658	-0.581265	-0.189973	0.231602	-1.68637	0.276888	-0.169438	-0.265948	-0.150706	0.261261	0.914896	0.335259	-0.345892	-0.217625	0.549888	-0.744308	0.441164	-0.0700053	0.905487	1.78273	1.84093	-0.433075	-0.48567	0.299997
-9.28277		0.8851	-0.0595824	-0.186345	0.145509	-0.662877	-0.612176	-0.0101211	-0.103954	-0.0360893	-0.579655	-0.438013	-0.146599	-0.455891	0.376825	0.148955	0.577728	-0.254838	0.954337	-0.627193	0.354322	-0.394274		-0.25353	0.218966	0.551875	-0.51373	-0.253608	0.172575	-1.67383	0.354202	-0.178487	-0.137994	-0.175826	0.3502	0.928287	0.380112	-0.304994	-0.273135	0.322017	-0.603723	0.293792	-0.152547	1.04172	1.88571	1.86522	-0.416912	-0.28124	0.25245
-9.23259		0.884997	-0.11955	-0.284542	0.158604	-0.655905	-0.58649	-0.00372665	-0.117078	-0.0506418	-0.653811	-0.473175	-0.0704314	-0.524729	0.360457	0.141823	0.598883	-0.246467	0.921648	-0.704919	0.360024	-0.457114		-0.203647	0.338248	0.556738	-0.46133	-0.287082	0.162942	-1.64668	0.326024	-0.161622	-0.156716	-0.275432	0.365501	0.928101	0.374677	-0.280402	-0.475846	0.236744	-0.569251	0.204499	-0.130135	1.31154	1.86977	1.69071	-0.459615	-0.12948	0.269437
-9.18241		0.880023	-0.169689	-0.332341	0.240365	-0.480917	-0.523611	-0.00602436	-0.114957	-0.0825146	-0.703148	-0.372751	-0.12213	-0.572026	0.458023	0.243578	0.578199	-0.250267	0.827218	-0.717814	0.379881	-0.554082		-0.171803	0.491719	0.581324	-0.426288	-0.283821	0.194054	-1.61212	0.221563	-0.140885	-0.246598	-0.273151	0.307269	0.903548	0.32026	-0.307572	-0.654881	0.290877	-0.534262	0.166997	-0.10571	1.57707	1.84452	1.43107	-0.568844	-0.16102	0.288213
-9.13224		0.860824	-0.193694	-0.256644	0.251573	-0.275856	-0.474194	-0.0197913	-0.107961	-0.0920978	-0.737222	-0.157425	-0.301029	-0.536091	0.499433	0.277511	0.563655	-0.242136	0.756727	-0.626635	0.417691	-0.673334		-0.136148	0.577696	0.609486	-0.408535	-0.283569	0.227415	-1.56392	0.175721	-0.142552	-0.329469	-0.168506	0.240134	0.834363	0.240027	-0.356164	-0.670993	0.317825	-0.413479	0.0735099	-0.174232	1.74792	1.90896	1.31021	-0.562033	-0.29998	0.279607
-9.08206		0.783756	-0.216338	-0.13161	0.0890955	-0.152442	-0.474865	-0.0349424	-0.118133	-0.0606447	-0.750044	0.0928991	-0.440746	-0.459441	0.42868	0.169699	0.531934	-0.201498	0.753643	-0.504936	0.462985	-0.718885		-0.102872	0.563858	0.620282	-0.3882	-0.301822	0.234912	-1.50854	0.230777	-0.160018	-0.405636	-0.130386	0.182992	0.738847	0.175426	-0.377188	-0.601789	0.20451	-0.389788	-0.11802	-0.270375	1.81601	1.99922	1.33773	-0.339241	-0.40816	0.270881
-9.03188		0.661745	-0.229723	-0.0942448	-0.0825997	-0.0981348	-0.506438	-0.0373329	-0.147332	-0.0212446	-0.776036	0.327239	-0.438469	-0.437618	0.350184	0.06718	0.431582	-0.118313	0.747915	-0.437234	0.469635	-0.659085		-0.105067	0.442155	0.575409	-0.341474	-0.300539	0.20129	-1.47593	0.293173	-0.160677	-0.493286	-0.249326	0.0983987	0.661666	0.15371	-0.367659	-0.564472	0.0271298	-0.638917	-0.314182	-0.269601	1.80277	1.97455	1.28308	-0.105453	-0.47117	0.296658
-8.9817		0.582189	-0.198657	-0.170259	-0.037986	-0.0839309	-0.489057	-0.0190405	-0.167801	-0.0186408	-0.808073	0.498445	-0.395977	-0.50307	0.339786	0.0892534	0.278781	0.0215342	0.644535	-0.409961	0.433234	-0.588009		-0.15395	0.205327	0.457597	-0.308574	-0.251885	0.140455	-1.48014	0.286833	-0.133041	-0.557398	-0.430983	-0.0188473	0.612413	0.151895	-0.361991	-0.509305	-0.0688756	-0.94808	-0.430265	-0.170985	1.75001	1.80301	1.04415	-0.104636	-0.52443	0.357463
-8.93153		0.597664	-0.137254	-0.259185	0.150682	-0.119269	-0.375909	0.0178089	-0.15818	-0.0489666	-0.801924	0.526303	-0.461277	-0.601806	0.331414	0.144384	0.142626	0.228607	0.457452	-0.347155	0.433976	-0.604698		-0.215821	-0.0651286	0.284411	-0.346904	-0.200646	0.10678	-1.49491	0.238204	-0.112921	-0.56344	-0.557644	-0.128285	0.563464	0.130079	-0.374663	-0.381929	-0.0750034	-0.937662	-0.495577	-0.0684791	1.73326	1.59512	0.850846	-0.23757	-0.5162	0.421177
-8.88135		0.644425	-0.102953	-0.286466	0.218869	-0.183007	-0.249331	0.0642435	-0.135683	-0.0700245	-0.796819	0.388375	-0.591143	-0.672396	0.244272	0.103053	0.0517909	0.479571	0.299366	-0.216652	0.536788	-0.698595		-0.261594	-0.196274	0.0836407	-0.396513	-0.219644	0.130412	-1.49582	0.19806	-0.14162	-0.548995	-0.631132	-0.218594	0.506122	0.0972768	-0.382748	-0.321691	-0.122913	-0.620275	-0.566193	0.00430324	1.79027	1.48011	0.940965	-0.209752	-0.40338	0.448713
-8.83117		0.616357	-0.101168	-0.288144	0.123969	-0.216924	-0.251126	0.107822	-0.134553	-0.064506	-0.869843	0.203442	-0.604145	-0.683831	0.121766	0.00514749	-0.0176221	0.721534	0.24453	-0.0473717	0.683572	-0.790675		-0.307121	-0.118046	-0.0959487	-0.323763	-0.316712	0.154661	-1.49921	0.175608	-0.200771	-0.563394	-0.69772	-0.315502	0.461187	0.0955912	-0.364961	-0.44665	-0.277308	-0.386933	-0.639706	0.0815851	1.84301	1.47894	1.19459	-0.001435	-0.29502	0.425422
-8.781		0.496812	-0.0715351	-0.324735	0.0733555	-0.213809	-0.399562	0.133029	-0.16191	-0.0553281	-0.964366	0.121982	-0.470917	-0.612107	0.0551201	-0.0403662	-0.069472	0.916652	0.25676	0.138149	0.7484	-0.836283		-0.374626	0.0233475	-0.174334	-0.129346	-0.427381	0.112552	-1.52787	0.167528	-0.221392	-0.574281	-0.729407	-0.407187	0.434498	0.12284	-0.33013	-0.58685	-0.414824	-0.398871	-0.708201	0.156606	1.77648	1.47	1.31658	0.106728	-0.32591	0.38363
-8.73082		0.367515	0.00533936	-0.387344	0.149495	-0.226294	-0.554348	0.130205	-0.194582	-0.0594105	-0.951743	0.15346	-0.393039	-0.477811	0.036931	-0.049869	-0.074842	1.05957	0.265926	0.343795	0.684579	-0.846802		-0.450028	0.0603297	-0.12993	0.0289337	-0.489224	0.0442831	-1.56186	0.173143	-0.173947	-0.521297	-0.667623	-0.438904	0.406156	0.12936	-0.29672	-0.519753	-0.36677	-0.367176	-0.794129	0.182416	1.59313	1.29747	1.26504	-0.0157293	-0.44161	0.386237
-8.68064		0.29535	0.060748	-0.432883	0.20517	-0.272334	-0.600084	0.114745	-0.212933	-0.0673539	-0.859503	0.188226	-0.520114	-0.407801	-0.00355957	-0.103255	-0.0378123	1.15044	0.267961	0.547094	0.562752	-0.842553		-0.513106	0.0317983	-0.0843512	0.0587291	-0.485616	0.0367079	-1.55812	0.167119	-0.117511	-0.435685	-0.539583	-0.404517	0.366715	0.09631	-0.26471	-0.349928	-0.134875	-0.0761485	-0.881983	0.157944	1.40772	0.976138	1.22637	-0.169929	-0.47722	0.465875
-8.63046		0.268705	0.0385586	-0.456276	0.177263	-0.307231	-0.579813	0.124343	-0.215582	-0.0736118	-0.832416	0.166365	-0.730726	-0.533988	-0.0589763	-0.162662	-0.00463394	1.18389	0.316968	0.691244	0.466563	-0.830142		-0.571897	0.0837571	-0.184637	0.038478	-0.432333	0.0606409	-1.50395	0.124935	-0.127844	-0.409132	-0.451748	-0.3754	0.329135	0.0590901	-0.223438	-0.34008	0.0979271	0.233286	-0.906868	0.114312	1.29233	0.73082	1.23458	-0.171634	-0.41072	0.582911
-8.58029		0.257895	-0.0214343	-0.475786	0.213939	-0.301298	-0.589557	0.176151	-0.20147	-0.0853258	-0.875442	0.12828	-0.815574	-0.790363	-0.0549626	-0.121414	0.00423465	1.16909	0.440052	0.758993	0.402023	-0.822087		-0.630236	0.212151	-0.39907	0.0631683	-0.366654	0.000458876	-1.42367	0.0807126	-0.201142	-0.449741	-0.470833	-0.39829	0.304794	0.0424974	-0.175731	-0.469044	0.163709	0.24091	-0.855733	0.0469601	1.20847	0.714817	1.13281	-0.102701	-0.36794	0.665356
-8.53011		0.273671	-0.0546906	-0.484331	0.385899	-0.274744	-0.635196	0.235198	-0.158756	-0.0940651	-0.85802	0.112416	-0.764707	-0.934673	0.00539836	-0.00127539	0.00246866	1.12654	0.590266	0.798728	0.327066	-0.844156		-0.662609	0.265568	-0.553288	0.124147	-0.339937	-0.139075	-1.34403	0.0904376	-0.268295	-0.462943	-0.554766	-0.414501	0.295666	0.0267344	-0.137996	-0.510641	0.0746801	0.0203397	-0.795793	-0.0450252	1.09565	0.771292	0.920828	-0.0921413	-0.39824	0.683329
-8.47993		0.322697	-0.0714723	-0.466757	0.520999	-0.246662	-0.684295	0.25147	-0.0817902	-0.0797925	-0.772309	0.113015	-0.719124	-0.846425	0.0273961	0.0607019	-0.0291949	1.05762	0.686954	0.839361	0.231707	-0.909402		-0.66056	0.177972	-0.581379	0.183194	-0.374626	-0.200307	-1.27774	0.131435	-0.286059	-0.387635	-0.604838	-0.333283	0.305258	-0.00751637	-0.118387	-0.477279	-0.0259335	-0.143767	-0.774526	-0.0979049	0.957547	0.659464	0.816069	-0.0818123	-0.41747	0.65279
-8.42976		0.354755	-0.119438	-0.439516	0.46357	-0.217398	-0.767321	0.222896	0.008218	-0.0515807	-0.75374	0.146701	-0.713543	-0.694766	-0.0185785	0.019405	-0.133261	0.945063	0.695581	0.839335	0.153852	-0.999194		-0.658709	0.045083	-0.600895	0.231265	-0.428003	-0.10097	-1.23334	0.113957	-0.269432	-0.272906	-0.566895	-0.157759	0.330934	-0.0482871	-0.104088	-0.585654	-0.0607426	-0.191843	-0.776746	-0.0660183	0.85953	0.439753	0.888283	0.0113911	-0.37439	0.577948
-8.37958		0.314328	-0.189917	-0.423674	0.303738	-0.209208	-0.899411	0.19184	0.0704087	-0.0437607	-0.825913	0.246053	-0.646533	-0.708546	-0.0254598	-0.0314866	-0.277736	0.787595	0.660454	0.776082	0.129303	-1.07687		-0.673253	-0.0342174	-0.698971	0.225197	-0.433756	0.0355445	-1.21487	0.0147043	-0.246721	-0.202938	-0.481474	0.0193863	0.350622	-0.0836376	-0.071501	-0.784726	-0.105488	-0.251156	-0.791169	-0.0197237	0.884001	0.381283	0.940276	0.0849995	-0.30906	0.45
-8.3294		0.218963	-0.238805	-0.39801	0.215409	-0.256964	-0.974715	0.18264	0.0788955	-0.0618206	-0.853283	0.355963	-0.494222	-0.868791	0.119362	-0.0331667	-0.356651	0.61049	0.645782	0.728939	0.155563	-1.10768		-0.66307	-0.0595146	-0.787917	0.0905712	-0.378542	0.0577317	-1.20545	-0.0742057	-0.232294	-0.209928	-0.435803	0.135678	0.340477	-0.123792	-0.00902133	-0.728372	-0.232337	-0.321438	-0.819889	-0.0508621	1.05416	0.519845	0.881923	0.0214177	-0.22732	0.314291
-8.27922		0.132457	-0.273645	-0.331664	0.228966	-0.350225	-0.891613	0.177902	0.0484028	-0.073279	-0.788838	0.347918	-0.390302	-0.963777	0.395223	-0.0438291	-0.320557	0.442814	0.650556	0.795319	0.200766	-1.07029		-0.592741	-0.0596292	-0.757214	-0.150017	-0.302528	-0.012375	-1.16767	-0.0721378	-0.240167	-0.27532	-0.456613	0.210408	0.30331	-0.175525	0.0664886	-0.303769	-0.346628	-0.293667	-0.818143	-0.124631	1.25627	0.588274	0.923255	-0.0567072	-0.07486	0.268194
-8.22905		0.0789524	-0.335789	-0.252365	0.286493	-0.444727	-0.735279	0.158997	0.0149586	-0.0638772	-0.757834	0.189702	-0.444892	-0.898764	0.671257	-0.113916	-0.227009	0.303044	0.619561	0.960188	0.225663	-0.982471		-0.480433	-0.0453095	-0.658581	-0.348407	-0.223812	-0.0465146	-1.07457	-0.0247928	-0.275901	-0.360406	-0.4657	0.265823	0.263722	-0.226284	0.117618	0.168141	-0.319217	-0.198322	-0.740825	-0.13925	1.30673	0.409966	1.20302	0.0512251	0.122746	0.349849
-8.17887		0.0332205	-0.406352	-0.226234	0.370769	-0.525682	-0.67277	0.13228	-0.00864129	-0.0602503	-0.83298	0.00464571	-0.58756	-0.792877	0.820922	-0.200815	-0.139742	0.197611	0.546509	1.12379	0.203096	-0.91965		-0.34973	-0.0553345	-0.6298	-0.393462	-0.111451	-0.000528449	-0.936211	-0.0302864	-0.311791	-0.419721	-0.37651	0.26666	0.238782	-0.265997	0.118445	0.377645	-0.232882	-0.179437	-0.656332	-0.0870514	1.16883	0.109886	1.49592	0.270125	0.23748	0.481307
-8.12869		-0.0213072	-0.41508	-0.266344	0.452548	-0.592248	-0.699487	0.105013	-0.0394878	-0.078787	-0.909139	-0.0908742	-0.65472	-0.762507	0.808432	-0.258237	-0.0680372	0.11516	0.504509	1.23042	0.140966	-0.959165		-0.210029	-0.136939	-0.694219	-0.335989	0.0358821	0.0563523	-0.784802	-0.0925053	-0.313089	-0.424709	-0.221239	0.183107	0.224205	-0.29746	0.0799324	0.363347	-0.289664	-0.256031	-0.681919	-0.0254204	1.02438	-0.108635	1.53676	0.323163	0.219797	0.566173
-8.07852		-0.0752715	-0.348213	-0.314635	0.44314	-0.6013	-0.668186	0.0703094	-0.0816988	-0.0925569	-0.878369	-0.114042	-0.584585	-0.765375	0.715988	-0.314743	-0.0247024	0.0401491	0.533765	1.29507	0.083624	-1.08006		-0.123271	-0.245128	-0.747046	-0.301793	0.12643	0.057153	-0.634932	-0.127309	-0.290531	-0.380979	-0.122648	0.063229	0.203859	-0.318858	0.0392832	0.281432	-0.46734	-0.309636	-0.784256	0.081936	1.03871	-0.186027	1.41789	0.151125	0.182356	0.59462
-8.02834		-0.122992	-0.270938	-0.329806	0.325193	-0.520244	-0.556318	0.0313307	-0.104651	-0.0763306	-0.783123	-0.128219	-0.473209	-0.722273	0.686369	-0.405852	-0.0379649	-0.00692011	0.565833	1.32925	0.0686576	-1.16316		-0.166814	-0.266079	-0.724777	-0.335198	0.0584228	0.00651525	-0.463285	-0.100927	-0.283231	-0.298151	-0.13517	-0.0191466	0.16341	-0.32536	0.0261657	0.13769	-0.512347	-0.288368	-0.789411	0.341613	1.13844	-0.173975	1.39397	-0.0210137	0.225249	0.606452
-7.97816		-0.16614	-0.233245	-0.343082	0.216287	-0.418191	-0.506843	0.0112836	-0.0849511	-0.0508633	-0.718252	-0.134628	-0.451977	-0.663748	0.794404	-0.496685	-0.0769641	0.0263312	0.533208	1.32804	0.0845651	-1.12667		-0.306655	-0.191817	-0.682198	-0.38235	-0.133977	-0.0420991	-0.218623	-0.0760137	-0.290397	-0.167828	-0.186198	-0.062049	0.0995152	-0.333621	0.0429564	-0.0700804	-0.335625	-0.252904	-0.638136	0.723917	1.13681	-0.155512	1.46182	-0.0736866	0.280654	0.606686
-7.92798		-0.198611	-0.225457	-0.395269	0.19412	-0.395399	-0.574078	0.0216696	-0.0484665	-0.0492336	-0.696725	-0.115915	-0.547528	-0.652994	0.992131	-0.527534	-0.0730331	0.139612	0.497866	1.32603	0.087543	-1.02072		-0.314045	-0.177442	-0.673836	-0.395506	-0.286709	-0.0332471	0.146609	-0.101777	-0.272932	-0.0100317	-0.202467	-0.11855	0.0258144	-0.371539	0.0711208	-0.180566	-0.163399	-0.219483	-0.485639	1.0093	1.00065	-0.206038	1.41491	-0.142772	0.233239	0.583151
-7.87781		-0.222987	-0.236007	-0.45941	0.18167	-0.434606	-0.619017	0.0418598	-0.0408162	-0.0639151	-0.6848	-0.0846246	-0.672161	-0.650846	1.21183	-0.494044	-0.0451922	0.228198	0.570952	1.37966	0.0524409	-0.945421		-0.0945458	-0.348312	-0.652598	-0.3927	-0.285152	0.0425307	0.618633	-0.137198	-0.227652	0.102771	-0.216856	-0.193266	-0.0289547	-0.432358	0.0875163	-0.0568	-0.189722	-0.103554	-0.468745	1.01239	0.853863	-0.303412	1.20344	-0.285816	0.11874	0.56647
-7.82763		-0.264287	-0.275395	-0.477677	0.113975	-0.444199	-0.529886	0.0442621	-0.0669117	-0.0648664	-0.67753	-0.0229574	-0.73115	-0.576143	1.45573	-0.439988	-0.0930335	0.182572	0.740306	1.4737	-0.00841806	-0.916587		0.136224	-0.615202	-0.558854	-0.408713	-0.181977	0.125387	1.08092	-0.129687	-0.19723	0.134651	-0.290523	-0.219662	-0.0365544	-0.471418	0.0772132	0.187235	-0.320239	0.1436	-0.50758	0.787934	0.769299	-0.324981	0.978162	-0.328204	0.076192	0.600866
-7.77745		-0.331403	-0.321616	-0.456578	0.0770398	-0.435701	-0.395364	0.0237003	-0.0896658	-0.0532767	-0.670775	0.113333	-0.714456	-0.455664	1.71391	-0.395284	-0.232521	0.0445574	0.891239	1.51544	-0.0659668	-0.872262		0.11669	-0.768389	-0.447558	-0.433281	-0.104548	0.147778	1.38675	-0.110294	-0.187373	0.156046	-0.394637	-0.152995	0.00572071	-0.466391	0.0392609	0.323658	-0.390995	0.4325	-0.449843	0.544077	0.705086	-0.246162	0.835518	-0.20923	0.135503	0.675733
-7.72728		-0.385895	-0.313617	-0.461122	0.14545	-0.51136	-0.364732	-0.00592846	-0.0855474	-0.0551735	-0.630279	0.260215	-0.684975	-0.402288	1.87438	-0.349363	-0.354519	0.00282873	0.982815	1.45356	-0.098289	-0.786045		-0.0930266	-0.722218	-0.425897	-0.431117	-0.102103	0.129011	1.52042	-0.145429	-0.140684	0.237032	-0.454707	-0.0374952	0.0605527	-0.451561	-0.0175738	0.289372	-0.412023	0.609116	-0.307228	0.395389	0.6266	-0.221092	0.732096	-0.153966	0.182552	0.742509
-7.6771		-0.389247	-0.230962	-0.504867	0.218518	-0.664965	-0.437956	-0.0271063	-0.0702025	-0.0703026	-0.549949	0.247605	-0.703682	-0.456628	1.83075	-0.276938	-0.387361	0.204799	1.0806	1.34404	-0.103082	-0.70302		-0.206617	-0.583885	-0.487778	-0.404647	-0.13011	0.15117	1.63368	-0.226607	-0.0312344	0.312659	-0.470098	0.0416972	0.0724196	-0.467809	-0.0845116	0.194769	-0.44034	0.59388	-0.213289	0.280817	0.553194	-0.328712	0.623246	-0.275176	0.139285	0.777924
-7.62692		-0.363273	-0.125555	-0.516415	0.18024	-0.7479	-0.487574	-0.0261565	-0.0616482	-0.0735308	-0.481692	0.0402889	-0.774829	-0.540489	1.63235	-0.184878	-0.391244	0.61173	1.2064	1.2572	-0.0943677	-0.662897		-0.121844	-0.496689	-0.515528	-0.394273	-0.138546	0.231067	1.86092	-0.2789	0.0738441	0.272032	-0.489993	0.04271	0.0203305	-0.502375	-0.15542	0.134683	-0.417364	0.448836	-0.205654	0.112174	0.480412	-0.409981	0.530673	-0.324752	0.055827	0.780358
-7.57674		-0.362193	-0.050067	-0.456593	0.110633	-0.674748	-0.435797	-0.003475	-0.0477669	-0.0662712	-0.452696	-0.148689	-0.840942	-0.565625	1.42035	-0.137028	-0.445801	1.06274	1.28263	1.17574	-0.0774121	-0.652441		-0.0161766	-0.503875	-0.45095	-0.413383	-0.122108	0.295239	2.15749	-0.271786	0.0995006	0.15408	-0.490782	-0.0146818	-0.0555031	-0.509198	-0.223102	0.128906	-0.301397	0.342105	-0.188467	-0.0854902	0.374711	-0.340746	0.486275	-0.123226	-0.00556	0.733314
-7.52657		-0.398118	-0.00676277	-0.401133	0.167918	-0.539336	-0.334218	0.0191052	-0.0105385	-0.0762481	-0.412911	-0.115792	-0.823085	-0.51365	1.26404	-0.205099	-0.54117	1.43997	1.26822	1.05153	-0.0333367	-0.654411		-0.0409654	-0.574029	-0.365955	-0.425658	-0.106919	0.307293	2.40293	-0.253975	0.0646928	0.106441	-0.390661	-0.0860548	-0.0987271	-0.474512	-0.282495	0.198525	-0.196273	0.415703	-0.100086	-0.219754	0.260197	-0.274253	0.49929	0.0695521	-0.06417	0.632247
-7.47639		-0.436235	0.0146418	-0.434978	0.343412	-0.483294	-0.27444	0.0178523	0.038108	-0.0996719	-0.326368	0.0660692	-0.694732	-0.410485	1.16776	-0.366506	-0.625784	1.73529	1.24273	0.924436	0.0489468	-0.689654		-0.135792	-0.668279	-0.342485	-0.405834	-0.122621	0.331941	2.59521	-0.263792	0.0423727	0.143946	-0.199202	-0.135085	-0.105311	-0.428643	-0.337512	0.356687	-0.195832	0.625884	0.000131249	-0.25964	0.207811	-0.375811	0.551177	-0.0386115	-0.15055	0.523316
-7.42621		-0.454918	0.00840722	-0.518865	0.495316	-0.538466	-0.261158	-0.00377435	0.0716573	-0.0985592	-0.251364	0.178565	-0.529706	-0.298787	1.17213	-0.485187	-0.681701	1.98698	1.2933	0.888895	0.137103	-0.771231		-0.182415	-0.739317	-0.372942	-0.384922	-0.169737	0.430853	2.81583	-0.266747	0.0511453	0.114254	-0.0450341	-0.148916	-0.120348	-0.39823	-0.393955	0.529327	-0.242765	0.743061	0.0393969	-0.256893	0.218613	-0.497931	0.577391	-0.247252	-0.24567	0.452142
-7.37604		-0.464987	-0.0116213	-0.552842	0.567024	-0.618716	-0.206434	-0.0215212	0.0886384	-0.0708532	-0.245014	0.164294	-0.44582	-0.243921	1.30306	-0.453094	-0.713673	2.20049	1.39605	0.938078	0.188128	-0.852131		-0.160107	-0.732797	-0.410436	-0.405889	-0.202951	0.575373	3.04468	-0.219229	0.0486875	-0.0451955	-0.0181611	-0.143935	-0.16471	-0.380923	-0.44554	0.609923	-0.265382	0.595745	0.0426536	-0.254384	0.210678	-0.407708	0.503696	-0.143188	-0.3507	0.393297
-7.32586		-0.469826	-0.00639281	-0.529715	0.622796	-0.597452	-0.0666423	-0.0236329	0.108238	-0.0630746	-0.244436	0.143463	-0.47533	-0.287841	1.45869	-0.33869	-0.724837	2.33618	1.47275	0.940566	0.208942	-0.871238		-0.0957191	-0.645796	-0.437744	-0.46482	-0.179432	0.702314	3.16619	-0.148981	0.0180401	-0.178518	-0.0741271	-0.149635	-0.20155	-0.370847	-0.479879	0.611364	-0.302175	0.301046	0.0912235	-0.234056	0.147011	-0.204007	0.331422	0.255638	-0.52474	0.297858
-7.27568		-0.456342	0.0272488	-0.517992	0.700229	-0.407494	0.0532787	-0.0181636	0.131979	-0.0893755	-0.157707	0.190854	-0.512776	-0.37212	1.49434	-0.32317	-0.728761	2.35765	1.50436	0.8203	0.240655	-0.842188		-0.00544862	-0.539615	-0.452073	-0.528842	-0.128529	0.778073	3.16943	-0.120706	0.00287094	-0.13585	-0.130343	-0.178744	-0.194396	-0.375994	-0.497123	0.655721	-0.363128	0.15469	0.215262	-0.176522	0.0905486	-0.188307	0.1457	0.534851	-0.77949	0.197338
-7.22551		-0.437309	0.0431938	-0.523221	0.754879	-0.137251	0.00628899	-0.00974846	0.139533	-0.104254	-0.0398984	0.269132	-0.425238	-0.384783	1.40622	-0.470814	-0.743747	2.28877	1.52336	0.676673	0.285099	-0.840936		0.0656996	-0.449985	-0.448186	-0.583221	-0.124006	0.779988	3.19549	-0.146182	0.0507015	0.00550177	-0.165187	-0.22253	-0.164608	-0.398047	-0.5034	0.782883	-0.319387	0.28657	0.369532	-0.123487	0.0985969	-0.371582	0.0385857	0.48952	-1.0099	0.183415
-7.17533		-0.447388	0.0207965	-0.491011	0.746376	0.00650647	-0.189681	0.00708568	0.122393	-0.0914202	-0.0407633	0.357401	-0.212061	-0.32358	1.31204	-0.633245	-0.771899	2.21188	1.53668	0.645863	0.298117	-0.887284		0.0599888	-0.335476	-0.445101	-0.618825	-0.173224	0.703027	3.33985	-0.182475	0.155152	0.0663542	-0.178199	-0.271415	-0.158841	-0.422576	-0.485791	0.87803	-0.0848385	0.526963	0.493492	-0.121744	0.137583	-0.42128	0.0577477	0.324066	-1.10366	0.277467
-7.12515		-0.465492	-0.00467327	-0.439516	0.695699	-0.090763	-0.340185	0.0297504	0.0941916	-0.106045	-0.174579	0.477417	-0.0224938	-0.329182	1.27625	-0.633353	-0.812936	2.18685	1.52248	0.704925	0.265712	-0.890744		-0.00649621	-0.168653	-0.473223	-0.595891	-0.190768	0.608668	3.52806	-0.207937	0.261027	0.0188286	-0.148792	-0.317639	-0.183218	-0.443144	-0.424802	0.846913	0.199126	0.638527	0.56207	-0.12228	0.144101	-0.145023	0.187099	0.237739	-1.0671	0.391571
-7.07497		-0.397072	-0.0132123	-0.458632	0.654967	-0.315986	-0.296685	0.0451795	0.0662991	-0.172377	-0.282455	0.580249	0.00461147	-0.485892	1.26826	-0.487889	-0.874567	2.18138	1.48469	0.721372	0.236082	-0.762502		-0.0656223	-0.0209477	-0.520984	-0.474998	-0.113195	0.575209	3.64919	-0.242102	0.309718	-0.0178137	-0.0944147	-0.342318	-0.207551	-0.467416	-0.34469	0.762128	0.306833	0.576468	0.593245	-0.0245022	0.115018	0.22138	0.322513	0.141874	-0.9856	0.442617
-7.0248		-0.192748	-0.0365493	-0.558758	0.662453	-0.465129	-0.113377	0.0492907	0.0399162	-0.209484	-0.255242	0.554422	-0.105872	-0.665434	1.25599	-0.365595	-0.938652	2.12004	1.45657	0.665008	0.249633	-0.547361		-0.110403	0.0288614	-0.550026	-0.284179	0.0090725	0.588224	3.71205	-0.286692	0.282263	0.0166706	-0.0826532	-0.331585	-0.219924	-0.484316	-0.317021	0.743251	0.1952	0.458886	0.636446	0.145365	0.101267	0.325208	0.327919	-0.103202	-0.91192	0.445282
-6.97462		0.0549528	-0.0883589	-0.639135	0.715028	-0.45411	0.0516073	0.0502524	0.022894	-0.136349	-0.163111	0.388954	-0.211659	-0.673359	1.22334	-0.355949	-0.959068	1.99767	1.4532	0.640423	0.277829	-0.373083		-0.191603	0.0396074	-0.564015	-0.110459	0.0762182	0.577601	3.79533	-0.305585	0.211033	0.050787	-0.122653	-0.304218	-0.237191	-0.458461	-0.383973	0.769022	0.0139577	0.36066	0.736083	0.198059	0.15362	0.137508	0.189865	-0.405279	-0.84555	0.455956
-6.92444		0.209083	-0.125494	-0.640821	0.761248	-0.334583	0.117408	0.0512297	0.026168	0.000398969	-0.117089	0.216594	-0.234889	-0.503885	1.12902	-0.383624	-0.927765	1.88847	1.45374	0.696918	0.271897	-0.278377		-0.300322	0.156728	-0.598922	-0.0163647	0.0609881	0.551978	3.92152	-0.283484	0.145524	0.0121441	-0.129092	-0.291331	-0.267909	-0.381037	-0.498846	0.734041	-0.102257	0.235615	0.867752	0.0184541	0.293317	-0.0666896	0.0607676	-0.555747	-0.77521	0.472802
-6.87427		0.265492	-0.12453	-0.625475	0.743164	-0.18686	0.115711	0.048863	0.0402599	0.0875682	-0.124812	0.144512	-0.225778	-0.332237	0.956086	-0.353391	-0.890751	1.82877	1.42835	0.736043	0.24565	-0.179742		-0.351917	0.401969	-0.646075	0.00224568	0.0229799	0.574252	4.05715	-0.254319	0.102183	-0.0681616	-0.059684	-0.296012	-0.302047	-0.292387	-0.580605	0.652811	-0.133611	0.0365566	0.926896	-0.235195	0.489767	-0.0936627	0.0807191	-0.515033	-0.69346	0.446052
-6.82409		0.35273	-0.132971	-0.658295	0.656864	-0.0809967	0.103641	0.0496031	0.0411748	0.0996102	-0.13922	0.126146	-0.238924	-0.277778	0.77059	-0.270997	-0.861758	1.75617	1.36236	0.665374	0.252147	-0.0307433		-0.308044	0.609109	-0.652675	-0.0208484	0.0203895	0.619572	4.17933	-0.245216	0.059886	-0.112739	-0.00347433	-0.308182	-0.333769	-0.223532	-0.591231	0.654005	-0.0726745	-0.163961	0.832186	-0.312646	0.650665	-0.0279991	0.216116	-0.441472	-0.59915	0.36827
-6.77391		0.5515	-0.188267	-0.709109	0.549959	-0.0706638	0.0995988	0.0673877	0.0222371	0.107275	-0.136292	0.0550676	-0.248989	-0.302487	0.647922	-0.191722	-0.783746	1.61024	1.26186	0.540165	0.278141	0.0824645		-0.244148	0.625155	-0.605756	-0.0493675	0.0451194	0.600924	4.27368	-0.237873	0.00605007	-0.10429	-0.0588731	-0.338994	-0.359687	-0.149695	-0.552741	0.754701	0.145392	-0.227431	0.637688	-0.217535	0.682115	-0.0321496	0.33221	-0.472004	-0.50914	0.29601
-6.72373		0.792302	-0.243374	-0.727492	0.465095	-0.139552	0.0827184	0.101399	-0.00359392	0.149318	-0.0891992	-0.0779739	-0.238545	-0.343274	0.588313	-0.147902	-0.626031	1.44279	1.14895	0.468983	0.23149	0.0658856		-0.270866	0.506529	-0.556297	-0.0281634	0.0421971	0.527231	4.32294	-0.214737	-0.0399923	-0.0941791	-0.199895	-0.387673	-0.362357	-0.0417424	-0.498368	0.803564	0.509105	-0.11614	0.491745	-0.190479	0.581412	-0.11018	0.349143	-0.577618	-0.43895	0.268468
-6.67356		0.959393	-0.239455	-0.734904	0.421587	-0.202192	0.0197084	0.133208	-0.0318103	0.1809	0.0234186	-0.186063	-0.26071	-0.398357	0.567033	-0.166762	-0.458165	1.36122	1.0412	0.449789	0.0721795	-0.0413078		-0.423408	0.428026	-0.545906	0.0870289	-0.0247883	0.487899	4.36131	-0.198443	-0.0634333	-0.120092	-0.33396	-0.39607	-0.337115	0.0673626	-0.456591	0.723249	0.795249	0.0512513	0.479742	-0.328301	0.439105	-0.161757	0.261846	-0.63734	-0.37344	0.25
-6.62338		1.03196	-0.20613	-0.772333	0.436836	-0.212085	-0.0975174	0.151271	-0.0703612	0.15979	0.133764	-0.209541	-0.331409	-0.433567	0.588269	-0.269187	-0.36269	1.38544	0.930943	0.394088	-0.106635	-0.133861		-0.634493	0.433261	-0.551702	0.245117	-0.12797	0.487373	4.47653	-0.210843	-0.0830563	-0.152357	-0.420622	-0.306379	-0.3273	0.118654	-0.458359	0.648993	0.754302	0.151154	0.552904	-0.432452	0.343046	-0.154954	0.0906396	-0.582671	-0.29588	0.188185
-6.5732		1.07307	-0.212871	-0.815021	0.507172	-0.20961	-0.228223	0.166161	-0.114108	0.115828	0.126701	-0.17342	-0.36644	-0.341436	0.623252	-0.403616	-0.316747	1.42839	0.800961	0.276529	-0.196771	-0.190926		-0.797975	0.392718	-0.520458	0.319897	-0.19486	0.445003	4.69007	-0.233772	-0.11603	-0.140497	-0.468029	-0.154064	-0.377779	0.113328	-0.506083	0.696102	0.482546	0.212026	0.611181	-0.335934	0.311661	-0.128484	-0.0973772	-0.449446	-0.23139	0.097725
-6.52303		1.11237	-0.25421	-0.810632	0.571665	-0.224445	-0.313565	0.195274	-0.14089	0.103452	0.00908224	-0.127131	-0.330763	-0.0960501	0.591832	-0.456359	-0.227806	1.41508	0.659012	0.167053	-0.223875	-0.266818		-0.867752	0.226381	-0.436166	0.27826	-0.175942	0.351097	4.90983	-0.243698	-0.140759	-0.0878226	-0.481768	-0.0347767	-0.451168	0.112969	-0.542754	0.743182	0.408226	0.336302	0.60145	-0.177148	0.315318	-0.105969	-0.178752	-0.335732	-0.2151	0.033089
-6.47285		1.09908	-0.267841	-0.762685	0.561239	-0.212011	-0.339282	0.236625	-0.139876	0.124674	-0.0957542	-0.0812931	-0.337293	0.146176	0.479173	-0.373127	-0.0694965	1.35752	0.531182	0.1183	-0.287246	-0.368019		-0.896753	0.0442191	-0.340113	0.252387	-0.079201	0.27112	5.07944	-0.243708	-0.132365	-0.0366493	-0.477725	0.00946497	-0.454217	0.156331	-0.502621	0.641021	0.754771	0.499469	0.526951	-0.169818	0.31842	-0.115574	-0.0887626	-0.331525	-0.23966	-0.00931
-6.42267		0.985507	-0.246664	-0.710367	0.48946	-0.138063	-0.351748	0.262338	-0.128015	0.13421	-0.165463	-0.0147828	-0.462353	0.222232	0.374091	-0.220572	0.0763695	1.29731	0.422812	0.0980743	-0.390994	-0.434952		-0.955003	-0.0120511	-0.28448	0.354617	0.0612859	0.200639	5.28311	-0.230635	-0.110916	0.0084425	-0.483384	0.0020572	-0.36665	0.216007	-0.394621	0.513724	1.20391	0.562506	0.418452	-0.25497	0.295423	-0.206137	0.0744519	-0.447552	-0.2773	-0.09129
-6.37249		0.817604	-0.238738	-0.655865	0.428128	-0.0433013	-0.404045	0.246357	-0.132818	0.106166	-0.322034	0.0970684	-0.576067	0.181533	0.327865	-0.10883	0.119267	1.22869	0.315015	0.0502562	-0.452288	-0.434798		-1.02339	0.0273712	-0.271048	0.49934	0.214438	0.0678797	5.59748	-0.180351	-0.107651	0.0765388	-0.485008	-0.0485046	-0.279521	0.242346	-0.292004	0.596197	1.32597	0.506636	0.324974	-0.209117	0.242086	-0.34	0.152416	-0.58076	-0.31559	-0.2205
-6.32232		0.693406	-0.239153	-0.576232	0.387707	0.0375638	-0.495627	0.205104	-0.164152	0.0666464	-0.575851	0.269385	-0.526946	0.204247	0.285492	-0.0964832	0.0639488	1.11218	0.196439	-0.03124	-0.460893	-0.393491		-1.02022	0.026135	-0.250701	0.534819	0.342533	-0.115584	5.93592	-0.102941	-0.104366	0.143511	-0.441427	-0.155442	-0.272239	0.222069	-0.236182	0.826257	1.17945	0.507887	0.298645	-0.0148495	0.182199	-0.380994	0.132221	-0.58984	-0.33423	-0.31254
-6.27214		0.635211	-0.182971	-0.484371	0.30453	0.140929	-0.572477	0.194782	-0.200179	0.056516	-0.704369	0.476225	-0.398053	0.338369	0.220138	-0.162466	-0.00421128	0.936989	0.069224	-0.108604	-0.498823	-0.338959		-0.9217	-0.0453826	-0.192168	0.481319	0.411763	-0.245615	6.17409	-0.0601207	-0.0632277	0.134517	-0.375107	-0.291627	-0.312683	0.186357	-0.194734	0.873049	1.15341	0.699134	0.356234	0.111466	0.146994	-0.303093	0.150661	-0.448891	-0.31357	-0.31019
-6.22196		0.567164	-0.0645221	-0.411623	0.164335	0.285298	-0.591765	0.246321	-0.201408	0.0792113	-0.526401	0.623569	-0.380638	0.457697	0.207661	-0.218123	-0.0219631	0.739219	-0.0659404	-0.142833	-0.589761	-0.277905		-0.78766	-0.0860908	-0.131464	0.4724	0.429506	-0.276107	6.3425	-0.0828253	-0.00319378	0.0477464	-0.367112	-0.406024	-0.326679	0.176412	-0.126015	0.598458	1.31201	0.977194	0.455446	0.0467751	0.147721	-0.275557	0.2639	-0.279058	-0.31206	-0.27584
-6.17179		0.445016	0.031105	-0.341536	0.0396441	0.391258	-0.58467	0.318149	-0.151861	0.0993065	-0.15936	0.616122	-0.461703	0.475972	0.281823	-0.167325	-0.0104772	0.566969	-0.197435	-0.119219	-0.659355	-0.227502		-0.672134	-0.0314743	-0.128073	0.507725	0.427276	-0.262715	6.54144	-0.120059	0.0148497	-0.0125544	-0.438592	-0.496768	-0.310348	0.205854	-0.0454866	0.254317	1.30442	1.14543	0.517588	-0.0900348	0.172873	-0.398475	0.333024	-0.160046	-0.43808	-0.29976
-6.12161		0.334132	0.0453043	-0.225288	-0.0411534	0.382123	-0.628598	0.348788	-0.0870747	0.0898018	0.161363	0.47906	-0.450301	0.459379	0.33478	-0.00967663	-0.0306567	0.44587	-0.293443	-0.0631387	-0.6786	-0.214653		-0.58265	0.0726348	-0.176387	0.46504	0.403783	-0.256866	6.74852	-0.116141	-0.0269818	0.0183731	-0.522884	-0.591478	-0.308163	0.254893	-0.00367293	0.143779	0.958381	1.15697	0.490652	-0.147668	0.196379	-0.500322	0.227801	0.0244966	-0.66882	-0.36868
-6.07143		0.305527	0.00977611	-0.0626698	-0.161394	0.31518	-0.737657	0.34512	-0.0628971	0.0648418	0.4179	0.3528	-0.28432	0.490551	0.267867	0.143453	-0.10385	0.378546	-0.34569	-0.0344009	-0.723156	-0.24109		-0.527379	0.163739	-0.188676	0.350391	0.338995	-0.26267	6.8852	-0.0886823	-0.0924914	0.0747347	-0.575239	-0.669356	-0.318501	0.304998	-0.0192029	0.256753	0.562767	1.1204	0.40938	-0.136984	0.184395	-0.385991	0.0318231	0.42113	-0.79886	-0.40806
-6.02125		0.332101	-0.0318589	0.0861508	-0.377281	0.320901	-0.820683	0.369619	-0.093397	0.0555038	0.77362	0.325429	-0.112591	0.535177	0.156307	0.20269	-0.200836	0.367276	-0.400766	-0.0700698	-0.833485	-0.286849		-0.523816	0.222469	-0.0887182	0.31889	0.256147	-0.292971	6.99534	-0.0761268	-0.159027	0.0858101	-0.625876	-0.686335	-0.297764	0.369634	-0.0582006	0.326513	0.413535	1.13886	0.374639	-0.153172	0.121223	-0.166228	-0.0930882	0.920761	-0.67705	-0.41688
-5.97108		0.36547	-0.0759459	0.173158	-0.595635	0.437959	-0.797079	0.439502	-0.138097	0.0662969	1.24409	0.326855	-0.0742423	0.496932	0.162034	0.202129	-0.288781	0.426742	-0.50071	-0.131887	-0.922043	-0.339904		-0.555504	0.231141	0.0847705	0.409097	0.201167	-0.363376	7.15411	-0.0572132	-0.234495	0.102519	-0.706653	-0.663391	-0.246677	0.469224	-0.078927	0.141364	0.407903	1.22963	0.439217	-0.215155	0.0377205	-0.113209	-0.149256	1.21574	-0.41942	-0.46094
-5.9209		0.437874	-0.101751	0.204953	-0.686399	0.58665	-0.718893	0.495946	-0.15201	0.0769227	1.60882	0.247564	-0.155504	0.339321	0.333352	0.213367	-0.355322	0.567949	-0.617173	-0.152105	-0.898331	-0.388879		-0.594075	0.183762	0.204524	0.470542	0.170889	-0.429628	7.26033	0.0081294	-0.307099	0.19813	-0.799802	-0.661698	-0.221519	0.583119	-0.081565	-0.260359	0.295611	1.33857	0.538019	-0.262817	-0.0155802	-0.242525	-0.234311	1.16693	-0.27777	-0.54458
-5.87072		0.583769	-0.0540787	0.21379	-0.66012	0.684095	-0.708808	0.492261	-0.127679	0.0802158	1.70265	0.117624	-0.259104	0.128981	0.567003	0.222321	-0.400296	0.776549	-0.69818	-0.13497	-0.814161	-0.402155		-0.663889	0.159102	0.202031	0.426772	0.133288	-0.426303	7.14983	0.0908222	-0.337036	0.31477	-0.868967	-0.679428	-0.250084	0.660456	-0.0991102	-0.639548	0.082512	1.36618	0.579986	-0.265399	-0.0319417	-0.277884	-0.313844	0.946111	-0.34811	-0.5929
-5.82055		0.722906	0.075311	0.221226	-0.638492	0.713726	-0.800478	0.458852	-0.0869199	0.0890807	1.64381	0.0846311	-0.290358	-0.00373439	0.730191	0.17365	-0.439795	1.01906	-0.751661	-0.161636	-0.797213	-0.351627		-0.80658	0.26617	0.146188	0.402304	0.0956579	-0.375554	6.89402	0.122045	-0.307389	0.32953	-0.881371	-0.661126	-0.29136	0.681242	-0.13926	-0.77516	-0.0521678	1.24642	0.574742	-0.263266	-0.0494733	-0.0689603	-0.280011	0.77114	-0.50441	-0.57523
-5.77037		0.738882	0.222322	0.22738	-0.689673	0.696844	-0.914709	0.44666	-0.0538915	0.104019	1.66671	0.214387	-0.201977	0.0207525	0.76034	0.0945635	-0.505169	1.26198	-0.819452	-0.274031	-0.871309	-0.24662		-0.984032	0.4695	0.133494	0.47965	0.0713068	-0.373278	6.75438	0.101794	-0.242029	0.232707	-0.812802	-0.603646	-0.295819	0.673462	-0.16174	-0.676666	-0.0768774	1.04847	0.596613	-0.299961	-0.0811232	0.167994	-0.190714	0.67071	-0.58379	-0.55089
-5.72019		0.634893	0.334515	0.21083	-0.781	0.66646	-0.978152	0.449652	-0.0411567	0.106375	1.81017	0.387795	-0.0586878	0.105341	0.674126	0.0812863	-0.599764	1.46818	-0.897425	-0.40013	-0.9235	-0.115475		-1.10472	0.585207	0.14544	0.521205	0.0129836	-0.452107	6.82475	0.108607	-0.17144	0.121203	-0.692902	-0.568092	-0.263643	0.666057	-0.13514	-0.560482	-0.11401	0.921768	0.659104	-0.352649	-0.0938613	0.158462	-0.214929	0.576994	-0.55376	-0.56176
-5.67001		0.50656	0.410503	0.147871	-0.858091	0.669687	-0.989931	0.429359	-0.0454371	0.0927965	1.89913	0.432164	-0.00842517	0.0485474	0.534605	0.163528	-0.670627	1.59001	-0.95509	-0.432797	-0.857464	0.030581		-1.15467	0.526759	0.087954	0.378459	-0.120987	-0.53161	6.92739	0.189504	-0.111973	0.0364709	-0.618263	-0.590617	-0.224458	0.659044	-0.0915472	-0.579843	-0.207747	0.90785	0.718672	-0.358693	-0.0785697	-0.0308464	-0.341404	0.481935	-0.50548	-0.56403
-5.61984		0.399863	0.445111	0.0467507	-0.879649	0.735249	-0.976076	0.389087	-0.0527423	0.085126	1.82062	0.312181	-0.102442	-0.163425	0.411712	0.247347	-0.664513	1.59891	-1.00943	-0.358641	-0.716987	0.185041		-1.21444	0.442359	-0.0546323	0.130422	-0.266944	-0.530491	6.89128	0.294599	-0.0694908	-0.0709771	-0.650674	-0.657673	-0.194256	0.643863	-0.0866351	-0.653121	-0.280378	0.909541	0.775146	-0.301258	-0.0831502	-0.10935	-0.371533	0.397116	-0.52546	-0.51265
-5.56966		0.300835	0.423203	-0.0550445	-0.800734	0.821195	-0.94573	0.371957	-0.0565612	0.0956513	1.68622	0.145424	-0.221222	-0.254403	0.352161	0.212102	-0.600694	1.52061	-1.09535	-0.271614	-0.616	0.313974		-1.32689	0.495523	-0.190067	-0.0400261	-0.331902	-0.470242	6.7394	0.344741	-0.0349059	-0.218104	-0.730717	-0.755032	-0.174706	0.618019	-0.122525	-0.630974	-0.290434	0.874077	0.864969	-0.232856	-0.136699	-0.0100586	-0.241725	0.280659	-0.57758	-0.44641
-5.51948		0.224881	0.386592	-0.134701	-0.61563	0.838222	-0.901427	0.391055	-0.0666122	0.112656	1.66007	0.0493506	-0.258058	-0.0122162	0.372321	0.0393155	-0.549108	1.41638	-1.17725	-0.266986	-0.58374	0.373362		-1.42866	0.606751	-0.233003	-0.096654	-0.338533	-0.430445	6.56235	0.325907	0.00908026	-0.349431	-0.762172	-0.859467	-0.169505	0.574883	-0.156118	-0.524314	-0.282037	0.874115	0.977342	-0.206517	-0.194854	0.0479328	-0.143805	0.106185	-0.53173	-0.43308
-5.46931		0.199769	0.414899	-0.197397	-0.410031	0.755186	-0.855384	0.406772	-0.0906802	0.127728	1.7229	0.020994	-0.268039	0.363551	0.455149	-0.164623	-0.546512	1.3339	-1.17833	-0.349895	-0.547753	0.359313		-1.44078	0.572309	-0.16597	-0.133072	-0.373145	-0.437155	6.38599	0.28562	0.0534348	-0.440672	-0.748663	-0.898572	-0.177672	0.511831	-0.17175	-0.436318	-0.281156	0.962053	1.07798	-0.221965	-0.211157	-0.0342253	-0.240884	-0.07421	-0.34548	-0.47219
-5.41913		0.183876	0.507422	-0.246682	-0.287937	0.658645	-0.83222	0.383277	-0.117502	0.144507	1.71809	-0.0286107	-0.34004	0.496508	0.538351	-0.269415	-0.568353	1.29023	-1.09885	-0.446845	-0.465167	0.318812		-1.36001	0.388349	0.0116229	-0.199932	-0.415517	-0.438821	6.21668	0.257407	0.0590483	-0.534111	-0.764336	-0.809751	-0.182095	0.449559	-0.192062	-0.369876	-0.265409	1.08336	1.18134	-0.257813	-0.210568	-0.0709472	-0.429095	-0.205141	-0.17177	-0.50482
-5.36895		0.112653	0.566018	-0.285483	-0.245375	0.665345	-0.858227	0.334112	-0.129323	0.154861	1.58834	-0.153811	-0.434682	0.349982	0.536094	-0.248578	-0.573526	1.27795	-1.02509	-0.4861	-0.385545	0.309304		-1.23496	0.27249	0.301242	-0.289097	-0.364343	-0.385982	6.07012	0.223947	0.0129027	-0.634864	-0.809602	-0.637094	-0.160685	0.410289	-0.221707	-0.279864	-0.247699	1.18973	1.29086	-0.312254	-0.230169	0.0450034	-0.503212	-0.29923	-0.19929	-0.49878
-5.31877		0.01412	0.531143	-0.343895	-0.192363	0.776247	-0.92164	0.294153	-0.120744	0.143097	1.44245	-0.305509	-0.461243	0.237831	0.409156	-0.204614	-0.550306	1.2614	-1.01168	-0.460887	-0.353747	0.357698		-1.11505	0.352592	0.641956	-0.412109	-0.234722	-0.300258	5.90985	0.156515	-0.039107	-0.669995	-0.788168	-0.493848	-0.107624	0.380919	-0.239125	-0.240003	-0.282859	1.29863	1.32109	-0.374341	-0.236422	0.118755	-0.45579	-0.387027	-0.41089	-0.48194
-5.2686		-0.0197633	0.457512	-0.442462	-0.101497	0.866863	-0.95545	0.269225	-0.0941316	0.119257	1.38947	-0.384447	-0.427957	0.328599	0.204095	-0.250528	-0.527755	1.19699	-1.02438	-0.420378	-0.335927	0.450874		-1.04806	0.50918	0.901773	-0.555851	-0.179963	-0.248796	5.67564	0.0666966	-0.0458132	-0.601952	-0.644623	-0.433956	-0.0408825	0.333729	-0.249038	-0.347618	-0.367258	1.38315	1.21148	-0.391181	-0.177252	-0.00557981	-0.467665	-0.460469	-0.60237	-0.49739
-5.21842		0.0388742	0.410992	-0.52248	-0.046407	0.842887	-0.917189	0.237267	-0.0517195	0.110325	1.42528	-0.364646	-0.417098	0.43679	0.00729875	-0.370369	-0.554358	1.09083	-1.01254	-0.405799	-0.296151	0.552636		-1.06269	0.586688	0.985864	-0.622375	-0.273533	-0.267806	5.39358	0.00181097	-0.0164989	-0.502295	-0.458685	-0.423549	0.0115541	0.273878	-0.283772	-0.499532	-0.429954	1.344	1.06231	-0.317447	-0.0802263	-0.153582	-0.630927	-0.499632	-0.63509	-0.55533
-5.16824		0.146884	0.366147	-0.494202	-0.0670072	0.753412	-0.873883	0.189731	-0.00873209	0.114666	1.50749	-0.336603	-0.471194	0.379572	-0.11749	-0.437503	-0.647195	1.00357	-0.978556	-0.410881	-0.265731	0.635844		-1.11935	0.609196	0.930878	-0.545027	-0.397672	-0.336314	5.1471	-0.00960833	-0.00341968	-0.457018	-0.365257	-0.416847	0.0384034	0.223265	-0.338455	-0.487617	-0.454338	1.15371	1.00698	-0.186847	-0.019875	-0.120377	-0.826053	-0.498214	-0.5683	-0.63322
-5.11807		0.283053	0.273962	-0.380367	-0.0931941	0.710515	-0.923258	0.146566	0.00324963	0.104063	1.63434	-0.3869	-0.563189	0.256775	-0.142339	-0.389428	-0.758636	0.96121	-0.956263	-0.415241	-0.2674	0.709405		-1.13558	0.684368	0.861919	-0.411781	-0.415567	-0.417506	4.94085	0.00435675	-0.0316894	-0.46375	-0.408972	-0.389883	0.0564869	0.172622	-0.361098	-0.320279	-0.500159	0.907839	1.00143	-0.0891775	-0.0102548	-0.019531	-0.91078	-0.45266	-0.53055	-0.70475
-5.06789		0.439397	0.177163	-0.323854	-0.0647424	0.747194	-1.03294	0.126242	-0.0270168	0.0745413	1.80318	-0.467505	-0.6268	0.227398	-0.0803481	-0.325607	-0.821745	0.901323	-0.961653	-0.431096	-0.24684	0.807766		-1.09035	0.806576	0.86526	-0.352581	-0.349207	-0.487909	4.70991	-0.0135	-0.0750723	-0.476108	-0.509008	-0.326074	0.0857106	0.10894	-0.328184	-0.227986	-0.562071	0.702065	0.907756	-0.0723866	-0.00270839	-0.0499462	-0.89816	-0.39274	-0.55657	-0.75627
-5.01771		0.544718	0.170902	-0.403582	-0.0422657	0.808153	-1.06702	0.120552	-0.0610198	0.0539138	1.97187	-0.472483	-0.603042	0.23612	-0.00551778	-0.364309	-0.82891	0.756933	-0.981791	-0.481824	-0.158453	0.946899		-1.04367	0.889517	0.919994	-0.363362	-0.300871	-0.519692	4.45209	-0.0848148	-0.100837	-0.489215	-0.557571	-0.2457	0.120265	0.0811881	-0.279563	-0.314276	-0.541651	0.584145	0.741313	-0.097803	0.0250975	-0.122162	-0.858911	-0.411093	-0.59122	-0.78359
-4.96753		0.529084	0.262962	-0.525869	-0.0999365	0.83617	-0.993691	0.111581	-0.050595	0.0526587	2.10795	-0.427068	-0.519732	0.152529	-0.0110409	-0.449273	-0.830422	0.556419	-0.992092	-0.547617	-0.048682	1.10566		-1.02735	0.937119	0.947702	-0.365344	-0.278404	-0.484016	4.22563	-0.170198	-0.113845	-0.519278	-0.521186	-0.224369	0.141835	0.163026	-0.25381	-0.415367	-0.438671	0.610687	0.642972	-0.10023	0.0443815	-0.0279193	-0.768328	-0.564384	-0.59443	-0.79349
-4.91736		0.466564	0.353148	-0.564788	-0.166847	0.808233	-0.943551	0.09942	-0.0057843	0.0466732	2.21933	-0.466744	-0.495628	0.0238693	-0.100952	-0.416841	-0.858131	0.384321	-0.980024	-0.574583	0.024749	1.26446		-0.997712	1.04185	0.905963	-0.370783	-0.20827	-0.401711	4.02484	-0.215533	-0.138348	-0.545845	-0.433235	-0.303452	0.15061	0.337226	-0.236652	-0.372725	-0.41184	0.767855	0.621925	-0.0708804	0.0340274	0.169705	-0.586345	-0.749554	-0.59053	-0.80981
-4.86718		0.51492	0.365113	-0.534056	-0.0967714	0.725074	-1.00578	0.0944054	0.0128167	0.0198708	2.30768	-0.605682	-0.576873	-0.00600164	-0.165875	-0.251153	-0.895842	0.273586	-0.956348	-0.538791	0.0793209	1.44105		-0.943425	1.21184	0.82058	-0.441378	-0.0912677	-0.348707	3.78508	-0.214026	-0.167234	-0.54333	-0.31733	-0.408512	0.159837	0.488662	-0.204896	-0.249216	-0.523788	0.854902	0.532008	-0.0637651	0.0118984	0.228383	-0.395917	-0.793401	-0.61996	-0.85007
-4.817		0.678973	0.333605	-0.53452	0.128016	0.62652	-1.08663	0.091487	-0.0224518	-0.0090297	2.34752	-0.684189	-0.632105	0.0660749	-0.115443	-0.128647	-0.928896	0.195961	-0.928257	-0.470906	0.125412	1.65382		-0.950736	1.31588	0.743416	-0.531949	-0.0346146	-0.37292	3.51151	-0.206495	-0.163947	-0.541368	-0.163978	-0.438179	0.171862	0.53868	-0.18064	-0.180652	-0.596535	0.685355	0.340164	-0.122293	0.00275352	0.113916	-0.303912	-0.672171	-0.66905	-0.88616
-4.76683		0.763322	0.330215	-0.591575	0.384986	0.586768	-1.06293	0.0781655	-0.0662643	-0.015226	2.33779	-0.615917	-0.538886	0.119074	3.02835e-05	-0.163708	-0.972823	0.135923	-0.863345	-0.418635	0.0830536	1.85904		-1.07563	1.23966	0.707308	-0.533302	-0.105624	-0.439502	3.28393	-0.221464	-0.127913	-0.58371	0.0133697	-0.406212	0.184723	0.525348	-0.202078	-0.17934	-0.500269	0.416763	0.226733	-0.218458	0.000948282	0.00207356	-0.270469	-0.52287	-0.67765	-0.86329
-4.71665		0.623156	0.353531	-0.643379	0.598173	0.637595	-0.978632	0.0640692	-0.0633626	0.000679301	2.31684	-0.527888	-0.399835	0.109664	0.0514999	-0.254992	-1.03492	0.110209	-0.718306	-0.406576	-0.101198	1.97362		-1.21332	1.02217	0.71887	-0.451277	-0.233388	-0.491955	3.12567	-0.238317	-0.118267	-0.638107	0.146937	-0.406135	0.204945	0.522976	-0.264016	-0.196775	-0.410446	0.411009	0.326196	-0.285863	-0.0318826	-0.0558634	-0.186138	-0.434278	-0.62737	-0.77635
-4.66647		0.35585	0.340816	-0.655647	0.809977	0.717901	-0.969269	0.0711981	-0.0205453	0.019987	2.2897	-0.547114	-0.404043	0.114811	-0.0075404	-0.267977	-1.08934	0.119683	-0.514102	-0.423795	-0.318368	1.97682		-1.20363	0.800016	0.764792	-0.399099	-0.307644	-0.524226	2.97308	-0.226886	-0.173397	-0.619412	0.173728	-0.455208	0.224064	0.543592	-0.323526	-0.252264	-0.530876	0.713435	0.514178	-0.302711	-0.127344	-0.187845	-0.0573584	-0.368451	-0.58045	-0.68778
-4.61629		0.165587	0.264393	-0.652441	1.04349	0.741157	-1.05343	0.092305	0.0140931	0.0273977	2.18988	-0.59722	-0.538077	0.192538	-0.0912971	-0.230888	-1.11719	0.135784	-0.338349	-0.434707	-0.411363	1.94406		-1.05609	0.673509	0.818989	-0.414468	-0.324069	-0.548313	2.78767	-0.204841	-0.238285	-0.514837	0.105071	-0.465062	0.205534	0.555707	-0.354602	-0.37803	-0.713495	0.954211	0.581434	-0.300755	-0.253256	-0.419237	0.0234557	-0.303001	-0.59001	-0.64407
-4.56612		0.119406	0.16863	-0.647795	1.21294	0.692169	-1.12627	0.0948274	0.0224692	0.0195601	1.96379	-0.546709	-0.630816	0.311535	-0.0907482	-0.227519	-1.14139	0.138586	-0.249481	-0.420138	-0.393137	1.94493		-0.972227	0.654193	0.863671	-0.410916	-0.35783	-0.538213	2.60606	-0.221076	-0.229135	-0.420026	0.00770639	-0.364477	0.135235	0.546285	-0.36968	-0.513225	-0.667499	0.867594	0.525183	-0.28783	-0.320902	-0.597368	0.0299675	-0.292717	-0.61673	-0.61786
-4.51594		0.123779	0.112338	-0.631314	1.22954	0.62934	-1.12912	0.0736468	0.0311076	0.00586715	1.66113	-0.432437	-0.638291	0.428662	-0.00165942	-0.212762	-1.18992	0.128267	-0.217175	-0.416362	-0.419461	1.94767		-1.10401	0.684628	0.899879	-0.320618	-0.415556	-0.471363	2.46115	-0.283742	-0.154515	-0.419803	-0.0701544	-0.179676	0.0635427	0.51691	-0.390011	-0.552658	-0.45587	0.629565	0.511473	-0.222075	-0.289647	-0.653937	0.000167221	-0.352824	-0.60084	-0.56597
-4.46576		0.0870603	0.109416	-0.617858	1.11834	0.615034	-1.10252	0.0606675	0.0616006	0.00203286	1.38232	-0.374584	-0.669363	0.563189	0.0649985	-0.0920167	-1.2434	0.0976841	-0.185627	-0.477638	-0.551379	1.88102		-1.3505	0.681102	0.919418	-0.182138	-0.41195	-0.393358	2.33088	-0.34378	-0.107	-0.489405	-0.127207	0.00672211	0.0463004	0.457306	-0.416885	-0.461602	-0.429806	0.525299	0.585455	-0.0969524	-0.235342	-0.711033	-0.0508832	-0.428212	-0.5747	-0.50231
-4.41559		0.0118421	0.134115	-0.638792	0.974665	0.662062	-1.0807	0.0718205	0.10037	0.0108289	1.15462	-0.365813	-0.749113	0.759196	-0.000717745	0.0792064	-1.25551	0.0339957	-0.159746	-0.588622	-0.677397	1.76481		-1.46899	0.609158	0.88732	-0.0735906	-0.319552	-0.369557	2.1901	-0.363243	-0.132488	-0.554379	-0.177383	0.129918	0.057011	0.369379	-0.437694	-0.28342	-0.668201	0.53472	0.595755	0.0053083	-0.256022	-0.828083	-0.109625	-0.511646	-0.61401	-0.47091
-4.36541		-0.0593306	0.158957	-0.680988	0.856284	0.727566	-1.05339	0.0890723	0.123543	0.0125811	0.931393	-0.316557	-0.77673	0.99315	-0.18138	0.129025	-1.22005	-0.042815	-0.188507	-0.666999	-0.699576	1.7017		-1.37512	0.531434	0.788593	-0.0375991	-0.2401	-0.391107	2.05809	-0.364268	-0.171348	-0.593443	-0.222487	0.189653	0.0170575	0.292615	-0.446172	-0.0774332	-0.829201	0.460125	0.44317	0.00299638	-0.337789	-0.858758	-0.123569	-0.642649	-0.70066	-0.47806
-4.31523		-0.117149	0.174164	-0.693755	0.760638	0.756435	-1.03967	0.106841	0.128263	-0.0103813	0.709634	-0.248041	-0.729883	1.15454	-0.341468	-0.00750567	-1.17981	-0.0780336	-0.282576	-0.67558	-0.671783	1.7301		-1.2374	0.522715	0.678094	-0.0779508	-0.252498	-0.39863	1.97122	-0.388401	-0.146609	-0.623574	-0.25613	0.249658	-0.0857465	0.264887	-0.445853	0.0955943	-0.659668	0.281606	0.24277	-0.0782205	-0.385277	-0.713808	-0.0696715	-0.761823	-0.732	-0.4938
-4.26506		-0.188207	0.185979	-0.658236	0.670467	0.749414	-1.08344	0.142915	0.128356	-0.0440362	0.55519	-0.263739	-0.705099	1.15328	-0.375937	-0.209491	-1.16005	-0.0392881	-0.392594	-0.669591	-0.68273	1.75919		-1.23157	0.542551	0.641217	-0.163011	-0.276227	-0.380391	1.94052	-0.438867	-0.0563522	-0.625497	-0.271269	0.358681	-0.172229	0.271443	-0.439926	0.162969	-0.364261	0.150912	0.145828	-0.145084	-0.361504	-0.582676	-0.00231286	-0.733584	-0.66548	-0.50551
-4.21488		-0.29342	0.208471	-0.600529	0.589686	0.76906	-1.15248	0.183935	0.132638	-0.0554592	0.481624	-0.343987	-0.723078	1.04558	-0.315764	-0.320475	-1.13104	0.0422159	-0.470781	-0.69889	-0.700105	1.69151		-1.30383	0.479795	0.70344	-0.23168	-0.200014	-0.368641	1.94553	-0.490915	0.0470573	-0.558574	-0.261792	0.464304	-0.183664	0.26233	-0.430833	0.0813626	-0.288816	0.127699	0.128712	-0.158022	-0.319636	-0.682332	0.0140104	-0.565654	-0.5679	-0.53355
-4.1647		-0.414146	0.249338	-0.539771	0.552384	0.84791	-1.1534	0.179446	0.139052	-0.0350789	0.400963	-0.331177	-0.680291	1.00699	-0.25989	-0.303899	-1.06113	0.102905	-0.515938	-0.731393	-0.635933	1.56026		-1.28747	0.326919	0.807651	-0.251186	-0.0822027	-0.354374	1.94667	-0.531977	0.124112	-0.44196	-0.235899	0.468697	-0.156473	0.212321	-0.429615	-0.103388	-0.423465	0.126318	0.0780342	-0.155963	-0.309983	-0.906423	-0.0475496	-0.452434	-0.51204	-0.59119
-4.11452		-0.498041	0.302774	-0.474311	0.593177	0.923069	-1.07918	0.121648	0.145027	-0.00940288	0.25721	-0.148589	-0.539827	1.15702	-0.25245	-0.243397	-0.974464	0.107325	-0.539028	-0.72124	-0.509126	1.48623		-1.17895	0.206988	0.88337	-0.261311	-0.0743166	-0.298137	1.90709	-0.558712	0.16279	-0.362927	-0.231962	0.375275	-0.149495	0.146124	-0.450929	-0.269871	-0.440345	0.0894839	-0.0158998	-0.17749	-0.328224	-0.956584	-0.193005	-0.528712	-0.4952	-0.65102
-4.06435		-0.508133	0.367449	-0.419992	0.678809	0.908969	-1.03065	0.0744201	0.154108	-0.00859718	0.124084	0.096807	-0.4044	1.44155	-0.275544	-0.240218	-0.913974	0.0654207	-0.517933	-0.686599	-0.423405	1.51802		-1.13663	0.207313	0.913382	-0.309836	-0.174041	-0.224309	1.82661	-0.55627	0.161678	-0.385811	-0.298523	0.289273	-0.153534	0.112767	-0.490794	-0.317022	-0.163494	0.0592399	-0.0876356	-0.217665	-0.348072	-0.765839	-0.368237	-0.694217	-0.47335	-0.66687
-4.01417		-0.464597	0.459333	-0.412465	0.696674	0.810247	-1.05001	0.0834605	0.17061	-0.0334281	0.0891	0.284375	-0.344487	1.70706	-0.307925	-0.321365	-0.865926	0.00285306	-0.431385	-0.662821	-0.403243	1.57424		-1.22546	0.283246	0.919844	-0.365941	-0.222282	-0.2094	1.74501	-0.518234	0.134938	-0.467116	-0.43361	0.261733	-0.128174	0.1427	-0.518721	-0.250744	0.203161	0.0739807	-0.146463	-0.262787	-0.34794	-0.56849	-0.429321	-0.748989	-0.42196	-0.62626
-3.96399		-0.421829	0.579123	-0.456841	0.57531	0.717363	-1.05402	0.109194	0.192723	-0.0581812	0.112198	0.440295	-0.302099	1.86146	-0.320427	-0.426391	-0.776133	-0.0633126	-0.327829	-0.640514	-0.372132	1.55631		-1.33791	0.349142	0.907523	-0.366358	-0.154427	-0.263489	1.68883	-0.474647	0.114784	-0.473113	-0.54552	0.24607	-0.0858388	0.218471	-0.50365	-0.164285	0.359166	0.0955966	-0.256881	-0.314334	-0.317249	-0.555926	-0.29233	-0.627189	-0.35051	-0.56496
-3.91382		-0.410055	0.680692	-0.50404	0.396721	0.709696	-0.994106	0.0951693	0.214876	-0.0602473	0.0902519	0.637992	-0.233239	1.94162	-0.262462	-0.480899	-0.643045	-0.118937	-0.301404	-0.610678	-0.299845	1.4718		-1.39592	0.371648	0.864918	-0.331828	-0.0808028	-0.310572	1.63352	-0.464889	0.123015	-0.304298	-0.509415	0.233552	-0.070509	0.287226	-0.446552	-0.125393	0.263122	0.0589058	-0.40761	-0.365798	-0.276753	-0.662401	-0.0860418	-0.445133	-0.29053	-0.527
-3.86364		-0.422459	0.717506	-0.490658	0.310418	0.794313	-0.955571	0.0575423	0.233684	-0.0455472	0.0020108	0.82586	-0.213282	2.03421	-0.134125	-0.481897	-0.536229	-0.14796	-0.376127	-0.611578	-0.248395	1.40995		-1.46017	0.348482	0.828259	-0.347686	-0.0756038	-0.303644	1.54785	-0.490365	0.154533	-0.0155036	-0.299696	0.301687	-0.0743606	0.316447	-0.378022	-0.110411	0.0966587	-0.0443316	-0.524555	-0.397378	-0.26702	-0.728584	-0.00539619	-0.354834	-0.26794	-0.52913
-3.81346		-0.450245	0.7164	-0.395671	0.345428	0.911671	-1.00333	0.0505339	0.246949	-0.0423219	-0.103401	0.888666	-0.304549	2.13992	-0.0297539	-0.488532	-0.498761	-0.151402	-0.462355	-0.665926	-0.237144	1.41714		-1.56911	0.281917	0.87622	-0.416997	-0.0551798	-0.277428	1.4511	-0.524624	0.200224	0.227384	-0.0545475	0.4736	-0.044525	0.327623	-0.320671	-0.0789199	-0.0105807	-0.146042	-0.592751	-0.409623	-0.288102	-0.71875	-0.0559155	-0.380467	-0.26437	-0.56512
-3.76328		-0.494392	0.752197	-0.262746	0.388985	0.970601	-1.04627	0.0753704	0.251417	-0.062525	-0.207713	0.841404	-0.416719	2.13798	-0.0301309	-0.522749	-0.485339	-0.15516	-0.467223	-0.721885	-0.18162	1.442		-1.62204	0.20244	1.00876	-0.430337	0.0609401	-0.266727	1.38342	-0.558457	0.259571	0.342507	0.0412251	0.640985	0.0314818	0.351412	-0.265749	-0.0655541	-0.0512673	-0.184561	-0.660307	-0.426476	-0.294831	-0.708847	-0.108827	-0.404964	-0.22604	-0.61482
-3.71311		-0.541817	0.840753	-0.170088	0.346402	0.910518	-0.975765	0.0855489	0.249939	-0.0775374	-0.320489	0.810568	-0.420207	1.93295	-0.0948732	-0.517793	-0.440024	-0.17303	-0.410841	-0.714607	-0.0342119	1.40894		-1.52841	0.148927	1.10036	-0.328672	0.215027	-0.250775	1.33872	-0.599036	0.31998	0.426365	-0.0518977	0.688492	0.108482	0.366927	-0.201494	-0.119389	-0.00697461	-0.206722	-0.735651	-0.447482	-0.27769	-0.757659	-0.1446	-0.322768	-0.1384	-0.64552
-3.66293		-0.566527	0.907273	-0.163671	0.240146	0.766801	-0.840726	0.0688773	0.256991	-0.0536184	-0.422045	0.829578	-0.352363	1.62694	-0.135095	-0.402331	-0.390927	-0.171816	-0.386931	-0.643045	0.108487	1.31044		-1.3601	0.105228	1.06029	-0.208405	0.315286	-0.208156	1.27545	-0.635458	0.357459	0.595761	-0.204436	0.611048	0.156371	0.326977	-0.154027	-0.18772	0.138887	-0.31249	-0.776353	-0.435491	-0.287961	-0.84971	-0.237308	-0.16442	-0.05831	-0.64072
-3.61275		-0.565911	0.877846	-0.217639	0.151368	0.656949	-0.748097	0.0630779	0.285497	-0.00612113	-0.491148	0.820752	-0.379189	1.44822	-0.131337	-0.211987	-0.407141	-0.103633	-0.43929	-0.547817	0.123725	1.21014		-1.24105	0.0202362	0.973821	-0.188228	0.342777	-0.164222	1.18154	-0.647027	0.370052	0.805875	-0.303968	0.470397	0.196366	0.234533	-0.16572	-0.174089	0.273478	-0.46687	-0.77822	-0.378121	-0.35113	-0.913647	-0.348293	-0.0163101	-0.03031	-0.63067
-3.56258		-0.569639	0.764585	-0.276364	0.135965	0.672346	-0.67396	0.0844774	0.327189	0.0152366	-0.543184	0.794406	-0.540452	1.47234	-0.0994767	-0.0552738	-0.48677	0.032113	-0.530129	-0.467854	0.0284771	1.17614		-1.16416	-0.095686	0.971907	-0.244138	0.290651	-0.154127	1.07908	-0.640191	0.375093	0.922114	-0.391364	0.32277	0.253096	0.144177	-0.225529	-0.102014	0.270047	-0.492644	-0.79088	-0.321196	-0.421507	-0.875228	-0.357565	0.126562	-0.00742	-0.65597
-3.5124		-0.60145	0.642266	-0.323674	0.19198	0.790431	-0.534397	0.0954552	0.353757	-0.00227664	-0.583817	0.866468	-0.656429	1.52216	-0.0217225	0.0374868	-0.55492	0.185405	-0.608575	-0.44756	-0.0519243	1.22206		-1.02494	-0.163744	1.0266	-0.275835	0.147312	-0.181869	0.971619	-0.636555	0.367204	0.916649	-0.552509	0.222006	0.315473	0.0837989	-0.262748	-0.0910356	0.233967	-0.333472	-0.828522	-0.30153	-0.458398	-0.747428	-0.276146	0.320795	0.086395	-0.70507
-3.46222		-0.649452	0.566084	-0.376526	0.249862	0.911666	-0.387718	0.0648428	0.340441	-0.0172386	-0.597283	1.02627	-0.555451	1.41641	0.085059	0.157491	-0.567909	0.300279	-0.65495	-0.51698	-0.0455037	1.2951		-0.786475	-0.149547	1.02091	-0.276841	0.0123784	-0.22919	0.837279	-0.631223	0.324841	0.874561	-0.742067	0.205664	0.361518	0.0232748	-0.23727	-0.16071	0.382262	-0.176853	-0.829877	-0.286806	-0.48055	-0.669349	-0.218495	0.52312	0.24501	-0.73153
-3.41204		-0.677937	0.526745	-0.424329	0.219037	0.97884	-0.381817	0.0191074	0.290077	-9.00647e-06	-0.625267	1.10235	-0.30551	1.20738	0.117088	0.374123	-0.556398	0.335177	-0.668501	-0.630521	0.00525485	1.31881		-0.522337	-0.115236	0.96918	-0.309282	0.0563665	-0.265645	0.677662	-0.606229	0.264975	0.838841	-0.821075	0.237976	0.389434	-0.0660267	-0.196797	-0.199339	0.663926	-0.188731	-0.73757	-0.240434	-0.510852	-0.769195	-0.186196	0.61041	0.400133	-0.72288
-3.36187		-0.651919	0.47563	-0.431882	0.0991249	1.0362	-0.501283	0.00163547	0.237898	0.0245867	-0.74306	1.04707	-0.122675	1.06091	0.0219682	0.627342	-0.55755	0.273374	-0.660418	-0.691004	0.0287592	1.26995		-0.325933	-0.121398	0.992993	-0.344937	0.260363	-0.253889	0.531179	-0.576546	0.235731	0.775372	-0.752239	0.235764	0.409094	-0.164529	-0.20356	-0.154342	0.787729	-0.277204	-0.579636	-0.209346	-0.536022	-0.970713	-0.0918229	0.555303	0.525893	-0.70044
-3.31169		-0.551563	0.387277	-0.405879	-0.00427048	1.14768	-0.540418	0.00983085	0.226846	0.022543	-0.899305	1.03512	-0.0984628	0.99479	-0.0871723	0.825272	-0.563859	0.16645	-0.653508	-0.663652	0.0139129	1.20984		-0.235833	-0.139689	1.09341	-0.287554	0.370889	-0.196078	0.427666	-0.573615	0.241388	0.678076	-0.652078	0.178336	0.425128	-0.23876	-0.239788	-0.110166	0.665712	-0.272544	-0.443234	-0.263299	-0.553644	-1.0452	0.0123498	0.468524	0.642839	-0.66317
-3.26151		-0.385424	0.293364	-0.396644	-0.0350367	1.2701	-0.377212	0.00833251	0.265275	0.00371806	-0.925569	1.16269	-0.124004	0.888366	-0.0836114	0.964478	-0.560793	0.136692	-0.654823	-0.608132	0.00516091	1.20836		-0.22253	-0.116365	1.12783	-0.158779	0.24707	-0.167671	0.35733	-0.588321	0.232189	0.587549	-0.630213	0.127337	0.438592	-0.287949	-0.241528	-0.135295	0.515751	-0.192175	-0.386315	-0.365969	-0.584801	-0.906201	-0.0407809	0.440164	0.741892	-0.59089
-3.21134		-0.195412	0.242049	-0.418012	-0.0768185	1.26953	-0.138169	-0.014126	0.313473	-0.000212717	-0.787005	1.27219	-0.0756474	0.710584	-0.0191204	1.06552	-0.564858	0.2663	-0.644151	-0.58254	0.0364749	1.24583		-0.214328	-0.0680342	1.04063	-0.102638	0.0761491	-0.241416	0.290198	-0.581828	0.186877	0.505093	-0.665023	0.117197	0.44997	-0.330104	-0.202897	-0.188181	0.463499	-0.161095	-0.395733	-0.408975	-0.608271	-0.73214	-0.239935	0.422787	0.801782	-0.49939
-3.16116		-0.0304733	0.226865	-0.427059	-0.197317	1.09677	-0.0204757	-0.0376683	0.326555	0.0117151	-0.656025	1.22653	0.0201108	0.585146	-0.0270205	1.08217	-0.590562	0.496334	-0.616746	-0.576785	0.0894292	1.24006		-0.16586	-0.0468797	0.956244	-0.16571	0.0707667	-0.375394	0.206994	-0.552898	0.147797	0.394895	-0.678103	0.0942091	0.456478	-0.365609	-0.182799	-0.217861	0.38834	-0.209353	-0.41922	-0.382411	-0.566704	-0.706333	-0.338706	0.315726	0.865645	-0.43739
-3.11098		0.0950469	0.18554	-0.406833	-0.298649	0.882799	-0.0567287	-0.0487424	0.302889	0.010637	-0.626165	1.14614	0.0393783	0.615134	-0.101565	0.996771	-0.614282	0.692741	-0.606102	-0.554407	0.11744	1.17165		-0.110385	-0.0562191	0.98262	-0.221846	0.121062	-0.442758	0.110532	-0.541552	0.148406	0.269191	-0.660914	-0.00256781	0.457114	-0.384165	-0.213118	-0.227249	0.25869	-0.29941	-0.421632	-0.402157	-0.47664	-0.755508	-0.179985	0.125913	0.986939	-0.42282
-3.0608		0.207746	0.0820269	-0.405998	-0.259819	0.789718	-0.139725	-0.0493547	0.271979	-0.0165137	-0.535232	1.19328	-0.071676	0.756084	-0.129446	0.917861	-0.61059	0.793715	-0.631807	-0.505945	0.0972994	1.12116		-0.107619	-0.0764273	1.05213	-0.174205	-0.0177542	-0.387872	0.0197665	-0.556415	0.157741	0.173158	-0.66589	-0.151226	0.456654	-0.396084	-0.259662	-0.199405	0.248692	-0.40715	-0.413448	-0.528037	-0.438425	-0.691076	0.0884172	-0.00899091	1.10202	-0.42026
-3.01063		0.33389	-0.041063	-0.459389	-0.151271	0.817787	-0.195807	-0.0387495	0.246679	-0.047243	-0.227289	1.30421	-0.223721	0.89262	-0.100478	0.935024	-0.607353	0.835797	-0.664311	-0.44905	0.0405615	1.1631		-0.158198	-0.131154	1.04058	-0.0929194	-0.30645	-0.29315	-0.0531121	-0.54895	0.130163	0.098587	-0.709094	-0.273036	0.453593	-0.426475	-0.28255	-0.0961107	0.374899	-0.450689	-0.42938	-0.654647	-0.483474	-0.532774	0.225187	0.0194657	1.07818	-0.38831
-2.96045		0.46299	-0.11969	-0.524567	-0.143115	0.848211	-0.230306	-0.0207483	0.214237	-0.0526673	0.178709	1.3291	-0.280545	0.958151	-0.124178	0.955739	-0.663842	0.860607	-0.679909	-0.413411	-0.0330774	1.28318		-0.226939	-0.237156	0.946518	-0.0767524	-0.460071	-0.265706	-0.125937	-0.486555	0.0732111	0.0146967	-0.746817	-0.318696	0.433239	-0.476211	-0.286166	0.0344965	0.37803	-0.320483	-0.479572	-0.651963	-0.507005	-0.513912	0.186163	0.14746	0.901163	-0.32706
-2.91027		0.563306	-0.154727	-0.543232	-0.24689	0.829966	-0.252548	-0.0197156	0.166874	-0.0314449	0.470708	1.28226	-0.210519	0.943866	-0.233988	0.849168	-0.790105	0.864085	-0.705188	-0.423556	-0.101805	1.42927		-0.312508	-0.322767	0.848956	-0.101379	-0.370161	-0.30923	-0.22716	-0.416683	0.0334431	-0.0359956	-0.745936	-0.304495	0.388604	-0.51396	-0.293673	0.0843171	0.143257	-0.096448	-0.537981	-0.547329	-0.421926	-0.75429	0.0919036	0.235212	0.697771	-0.27298
-2.8601		0.622625	-0.198286	-0.526612	-0.321064	0.804859	-0.263811	-0.0535214	0.114553	-0.00589442	0.657003	1.25749	-0.109432	0.856631	-0.318916	0.6731	-0.919225	0.829191	-0.759985	-0.467156	-0.128084	1.57804		-0.409104	-0.297105	0.749795	-0.0899284	-0.2337	-0.346761	-0.342211	-0.418436	0.0368597	0.0128825	-0.726548	-0.280475	0.339858	-0.518239	-0.309936	0.0503814	-0.100848	-0.0133291	-0.585143	-0.491758	-0.291744	-1.06245	0.0269501	0.291158	0.556844	-0.24842
-2.80992		0.655821	-0.262326	-0.533561	-0.308059	0.772397	-0.301574	-0.0996782	0.071508	0.00910215	0.891896	1.2283	-0.0631582	0.726936	-0.288217	0.572728	-0.979304	0.753331	-0.803601	-0.496695	-0.0824383	1.70142		-0.447728	-0.182054	0.583895	-0.0340515	-0.234725	-0.334449	-0.411741	-0.497043	0.0693342	0.120048	-0.716366	-0.276677	0.314298	-0.507207	-0.327792	0.03926	-0.171518	-0.0901264	-0.627973	-0.577919	-0.230701	-1.13436	0.00660823	0.467046	0.446541	-0.21738
-2.75974		0.681713	-0.298332	-0.584156	-0.288592	0.676793	-0.401698	-0.122271	0.0503632	0.0201775	1.18637	1.12628	-0.0473657	0.629247	-0.19787	0.52633	-0.978158	0.644624	-0.79546	-0.493131	0.0106215	1.73111		-0.393312	-0.0829691	0.377092	0.035587	-0.316669	-0.303323	-0.413291	-0.563439	0.104891	0.171302	-0.694796	-0.278626	0.310693	-0.509145	-0.344121	0.0917262	-0.167672	-0.0670283	-0.658742	-0.752716	-0.247895	-0.90402	0.0512498	0.801072	0.329307	-0.11658
-2.70956		0.716318	-0.287201	-0.632178	-0.301483	0.550158	-0.522087	-0.118503	0.0606461	0.0351013	1.40517	1.00344	-0.0153789	0.626813	-0.166946	0.405322	-0.990962	0.524874	-0.769772	-0.504002	0.0849398	1.63334		-0.357514	-0.0470597	0.271621	0.11385	-0.337889	-0.30033	-0.414975	-0.534974	0.134851	0.141295	-0.613559	-0.267139	0.301354	-0.519481	-0.354701	0.158326	-0.145864	0.133452	-0.645198	-0.894904	-0.275347	-0.626749	0.142868	1.12944	0.235069	0.047023
-2.65939		0.77668	-0.290509	-0.622388	-0.289827	0.525548	-0.58593	-0.103489	0.0930422	0.0423329	1.49974	0.933767	-0.0167303	0.684833	-0.246748	0.243131	-1.06343	0.424274	-0.788075	-0.581312	0.0974819	1.47913		-0.468407	-0.0405396	0.346784	0.18206	-0.279955	-0.332692	-0.498253	-0.432241	0.170464	0.110746	-0.467983	-0.281852	0.269883	-0.509955	-0.354845	0.257787	0.0517018	0.202962	-0.597122	-0.925631	-0.289464	-0.586022	0.157548	1.3288	0.179963	0.167012
-2.60921		0.854931	-0.363956	-0.560799	-0.256498	0.645356	-0.594206	-0.073313	0.116008	0.0251099	1.545	0.864743	-0.125613	0.695247	-0.409644	0.215522	-1.15447	0.345828	-0.846377	-0.702455	0.0520071	1.36156		-0.650361	-0.0424491	0.497693	0.176686	-0.21365	-0.373252	-0.639735	-0.34943	0.222217	0.125117	-0.324547	-0.395714	0.230475	-0.470272	-0.355764	0.467249	0.42275	-0.0548697	-0.58412	-0.839144	-0.319603	-0.762011	-0.0146065	1.48293	0.118788	0.156361
-2.55903		0.898612	-0.46446	-0.520823	-0.30477	0.771172	-0.611488	-0.0307885	0.108193	-0.0104776	1.56427	0.740598	-0.296962	0.61556	-0.589953	0.350162	-1.19197	0.254919	-0.888558	-0.792922	-0.0338829	1.27209		-0.695679	-0.0609069	0.558916	0.0694729	-0.176695	-0.389343	-0.729416	-0.343094	0.27467	0.14517	-0.264166	-0.59454	0.203651	-0.41866	-0.377459	0.724256	0.634477	-0.329893	-0.637676	-0.674384	-0.37543	-0.877438	-0.289321	1.70984	0.027402	0.066299
-2.50886		0.863951	-0.507051	-0.567081	-0.463351	0.761168	-0.64516	-0.0204769	0.0836703	-0.0380613	1.50151	0.647405	-0.419395	0.521955	-0.697788	0.462291	-1.16418	0.131589	-0.892317	-0.813093	-0.139835	1.13787		-0.560803	-0.0684721	0.499663	-0.0711842	-0.166249	-0.366709	-0.716314	-0.382606	0.287676	0.144079	-0.299391	-0.744374	0.185245	-0.379711	-0.415645	0.855921	0.488458	-0.230267	-0.697375	-0.495305	-0.433225	-0.77101	-0.443975	1.9833	-0.04757	0.021674
-2.45868		0.785875	-0.482508	-0.671312	-0.611692	0.647604	-0.634331	-0.0741907	0.0675308	-0.0417982	1.37518	0.652135	-0.484582	0.48262	-0.674102	0.415123	-1.12461	0.0104164	-0.886969	-0.784721	-0.225347	0.954321		-0.428256	-0.0252103	0.429041	-0.158982	-0.179663	-0.329126	-0.675476	-0.404276	0.237416	0.150379	-0.358683	-0.748688	0.152974	-0.371284	-0.442708	0.868107	0.221884	0.137452	-0.714136	-0.38059	-0.469326	-0.591959	-0.379823	2.23	-0.05941	0.059215
-2.4085		0.745854	-0.444656	-0.732167	-0.653849	0.561267	-0.57156	-0.140278	0.0607961	-0.0310784	1.29339	0.635789	-0.565884	0.459795	-0.576158	0.279962	-1.11411	-0.0621626	-0.895003	-0.747154	-0.259582	0.789369		-0.441007	0.0252916	0.436269	-0.19589	-0.20702	-0.322884	-0.697544	-0.37798	0.154679	0.171879	-0.360852	-0.685625	0.102059	-0.400309	-0.451542	0.968503	0.0929565	0.363415	-0.737404	-0.377247	-0.470568	-0.545634	-0.250586	2.43712	-0.01311	0.10673
-2.35832		0.771481	-0.403293	-0.692898	-0.644519	0.558618	-0.538038	-0.13758	0.0516194	-0.0230412	1.28467	0.4908	-0.648273	0.412425	-0.527669	0.196635	-1.11411	-0.0901478	-0.902659	-0.731527	-0.278136	0.668916		-0.525717	-0.0221497	0.498982	-0.251198	-0.228973	-0.359674	-0.764152	-0.314487	0.0985335	0.157239	-0.287868	-0.694462	0.0579027	-0.448085	-0.460759	1.19949	0.000523907	0.32935	-0.816931	-0.444231	-0.443274	-0.576317	-0.273831	2.55457	0.083204	0.114554
-2.30815		0.818373	-0.321058	-0.606838	-0.652384	0.608297	-0.579383	-0.069747	0.0480128	-0.0239138	1.25273	0.341802	-0.642566	0.39932	-0.550916	0.2043	-1.0808	-0.114792	-0.892	-0.764446	-0.352805	0.554585		-0.536681	-0.186762	0.551477	-0.356744	-0.246216	-0.40194	-0.785487	-0.238588	0.0827139	0.0620076	-0.155257	-0.768902	0.0419615	-0.472047	-0.459119	1.30374	-0.211226	0.239777	-0.877479	-0.483782	-0.424703	-0.466893	-0.445568	2.47656	0.250167	0.121585
-2.25797		0.850429	-0.22063	-0.560956	-0.610966	0.687056	-0.627881	-0.0139958	0.0708468	-0.0318256	1.13327	0.342476	-0.574116	0.453352	-0.55101	0.246777	-0.990138	-0.15389	-0.871674	-0.842175	-0.491622	0.43986		-0.445684	-0.351325	0.576823	-0.468103	-0.271799	-0.428077	-0.728165	-0.171372	0.0552048	-0.0944933	0.0649908	-0.784865	0.0369881	-0.447873	-0.398193	1.12234	-0.392655	0.173468	-0.800852	-0.457567	-0.437879	-0.191856	-0.532033	2.25612	0.477921	0.172403
-2.20779		0.884215	-0.196998	-0.564484	-0.436266	0.798579	-0.602728	-0.00291765	0.117229	-0.0451383	0.97357	0.394457	-0.583985	0.437208	-0.497972	0.247357	-0.83998	-0.189183	-0.864572	-0.906279	-0.628115	0.373087		-0.313086	-0.396205	0.596459	-0.529229	-0.2931	-0.464552	-0.647404	-0.124639	-0.0278552	-0.251924	0.412463	-0.709242	0.00773846	-0.400713	-0.279885	0.881675	-0.345754	-0.0147563	-0.611613	-0.43098	-0.440523	0.0304927	-0.390821	2.15471	0.682577	0.240346
-2.15762		0.947618	-0.280142	-0.549084	-0.221676	0.930392	-0.529437	0.00474864	0.156802	-0.0591148	0.831384	0.325518	-0.705702	0.203383	-0.484558	0.160501	-0.648085	-0.208767	-0.871571	-0.904942	-0.721697	0.359666		-0.172823	-0.320802	0.604528	-0.54242	-0.288137	-0.520872	-0.607693	-0.101853	-0.134562	-0.35764	0.81271	-0.636971	-0.0466638	-0.371965	-0.193277	0.849377	-0.179909	-0.350519	-0.470024	-0.467283	-0.391487	0.0602734	-0.204218	2.3163	0.770005	0.267808
-2.10744		1.04343	-0.361718	-0.463816	-0.158901	1.0688	-0.500446	0.0339946	0.168769	-0.0642134	0.715609	0.22017	-0.799132	-0.135485	-0.544152	0.0304529	-0.466099	-0.227493	-0.851669	-0.876232	-0.796278	0.326306		-0.0384776	-0.191488	0.558962	-0.553783	-0.275907	-0.556628	-0.624604	-0.105645	-0.196484	-0.392295	1.08313	-0.615437	-0.0877924	-0.366492	-0.199381	0.911226	-0.106463	-0.614412	-0.46331	-0.525993	-0.352044	0.0189249	-0.254926	2.55569	0.727799	0.240089
-2.05726		1.16823	-0.326295	-0.335334	-0.273771	1.2361	-0.554148	0.0560509	0.161758	-0.0594429	0.644594	0.283467	-0.756691	-0.290118	-0.56588	-0.0106509	-0.354162	-0.258394	-0.749676	-0.899963	-0.856891	0.225494		0.042009	-0.040731	0.438928	-0.580048	-0.295522	-0.55611	-0.679469	-0.137589	-0.194976	-0.369534	1.13462	-0.579833	-0.0928914	-0.356989	-0.229776	0.78425	-0.0948388	-0.625955	-0.503075	-0.519334	-0.410905	0.063933	-0.521571	2.64027	0.624781	0.191325
-2.00708		1.32833	-0.208601	-0.232811	-0.384989	1.44286	-0.647443	0.0572765	0.148922	-0.0597932	0.635839	0.463436	-0.638142	-0.170928	-0.481838	0.102939	-0.312991	-0.290671	-0.561459	-0.965685	-0.852182	0.10844		0.0321657	0.110052	0.284226	-0.58267	-0.328093	-0.559398	-0.744135	-0.184769	-0.168785	-0.309861	1.08906	-0.488166	-0.0890158	-0.327889	-0.180761	0.508978	-0.0223249	-0.452492	-0.480834	-0.428332	-0.510192	0.147175	-0.697999	2.62152	0.528512	0.162056
-1.95691		1.50947	-0.139983	-0.193938	-0.357422	1.61633	-0.724426	0.0699978	0.120481	-0.076036	0.622065	0.513997	-0.551971	-0.00660988	-0.393084	0.230413	-0.276726	-0.311524	-0.366947	-0.978144	-0.76653	0.0422422		-0.0199579	0.18675	0.164183	-0.535102	-0.29518	-0.567761	-0.787036	-0.2202	-0.14883	-0.215657	1.10779	-0.374173	-0.115948	-0.284142	-0.0622732	0.391975	0.0196541	-0.286612	-0.439014	-0.303212	-0.486002	0.135618	-0.630572	2.68408	0.452067	0.164092
-1.90673		1.64913	-0.160667	-0.192143	-0.271693	1.65832	-0.764524	0.107226	0.0567145	-0.0933765	0.509317	0.401072	-0.52445	-0.0289157	-0.402402	0.151928	-0.203492	-0.333853	-0.271711	-0.913923	-0.675828	0.00592232		-0.0333995	0.127645	0.116205	-0.487651	-0.164746	-0.509966	-0.790385	-0.228248	-0.12785	-0.0936473	1.17423	-0.231234	-0.174872	-0.222489	0.0448421	0.504185	-0.135803	-0.249353	-0.492564	-0.184736	-0.313249	0.0477096	-0.510553	2.79459	0.385013	0.168381
-1.85655		1.67965	-0.180881	-0.168726	-0.280569	1.59834	-0.780239	0.130373	-0.0354913	-0.0884416	0.330861	0.350399	-0.530312	-0.186234	-0.454294	-0.148017	-0.136871	-0.38194	-0.305441	-0.872538	-0.65194	-0.0701238		-0.00783454	-0.00408986	0.127355	-0.514305	-0.0182006	-0.372669	-0.770684	-0.217646	-0.0931056	0.00434084	1.15826	0.00485074	-0.234292	-0.128527	0.139842	0.575496	-0.402988	-0.330725	-0.628857	-0.0890458	-0.162601	0.0072475	-0.545318	2.73863	0.339746	0.12861
-1.80638		1.61781	-0.139707	-0.0902859	-0.396177	1.61364	-0.805985	0.113646	-0.110854	-0.0634225	0.208632	0.46978	-0.546832	-0.251918	-0.455237	-0.430144	-0.140949	-0.453373	-0.395937	-0.922807	-0.667978	-0.189339		-0.0143663	-0.074812	0.168785	-0.598027	0.0356075	-0.268769	-0.765388	-0.201654	-0.0561148	0.00742175	1.03942	0.305098	-0.273295	-0.0111807	0.289201	0.437861	-0.519426	-0.421113	-0.707824	-0.041291	-0.15131	0.0465838	-0.655256	2.45972	0.331346	0.041734
-1.7562		1.57614	-0.0986366	0.0238442	-0.507145	1.8279	-0.867418	0.086994	-0.119516	-0.0412421	0.158248	0.594407	-0.539469	-0.101822	-0.432923	-0.472736	-0.208635	-0.51789	-0.455833	-0.989023	-0.657363	-0.273175		-0.0749304	-0.0557485	0.218581	-0.638278	-0.00644978	-0.28862	-0.800403	-0.183076	-0.0452046	-0.0947475	0.926507	0.526211	-0.29856	0.0845342	0.478659	0.264471	-0.406326	-0.402303	-0.663563	-0.0609306	-0.183576	0.112967	-0.646072	2.15367	0.332702	-0.02045
-1.70602		1.63658	-0.125927	0.122314	-0.550552	2.12942	-0.930832	0.0824506	-0.058382	-0.0287777	0.0788791	0.584673	-0.483077	0.202522	-0.455663	-0.309555	-0.280209	-0.564417	-0.479073	-0.961792	-0.620432	-0.258196		-0.127905	-0.05306	0.242807	-0.601644	-0.0522282	-0.369622	-0.878666	-0.166659	-0.0805853	-0.234749	0.869677	0.606505	-0.326324	0.115961	0.605979	0.239216	-0.261107	-0.276799	-0.586514	-0.133186	-0.137125	0.195855	-0.510337	2.01613	0.303774	0.024279
-1.65584		1.7361	-0.180142	0.167029	-0.572882	2.27906	-0.923445	0.0838403	0.0162578	-0.0117969	-0.0583056	0.553388	-0.424432	0.509583	-0.493758	-0.142963	-0.328381	-0.625952	-0.528347	-0.857834	-0.610895	-0.171277		-0.131691	-0.142277	0.203065	-0.584626	-0.053321	-0.402683	-0.983164	-0.162877	-0.149257	-0.3461	0.791228	0.650582	-0.364234	0.0867518	0.634716	0.253719	-0.296831	-0.170531	-0.569672	-0.238709	-0.0752215	0.287523	-0.382973	2.04183	0.263057	0.166916
-1.60567		1.74437	-0.186995	0.170619	-0.628654	2.19303	-0.842655	0.0648401	0.0426205	0.0111723	-0.165873	0.672216	-0.446338	0.663021	-0.478179	-0.0895334	-0.373506	-0.728939	-0.632258	-0.792862	-0.646818	-0.101745		-0.124187	-0.263393	0.124001	-0.65581	-0.0572083	-0.380909	-1.07551	-0.169274	-0.20367	-0.430854	0.63394	0.750001	-0.406796	0.0432068	0.643138	0.137212	-0.506335	-0.152184	-0.582498	-0.374195	-0.127421	0.291829	-0.318712	2.08968	0.271126	0.305929
-1.55549		1.63687	-0.162544	0.19375	-0.6968	2.01975	-0.786628	0.0403497	0.0219412	0.0205046	-0.200374	0.900916	-0.547111	0.576783	-0.417325	-0.0924927	-0.422255	-0.836397	-0.731829	-0.829279	-0.691044	-0.114567		-0.13761	-0.326334	0.100471	-0.713916	-0.0994597	-0.350192	-1.11383	-0.174148	-0.206757	-0.531464	0.474043	0.846965	-0.439586	0.0283368	0.694571	-0.0120962	-0.693562	-0.134007	-0.556617	-0.501025	-0.243384	0.152523	-0.283776	2.04025	0.336917	0.367557
-1.50531		1.50719	-0.177042	0.283415	-0.729248	1.91704	-0.816441	0.0429089	0.0126567	0.0105404	-0.223822	1.04153	-0.617297	0.337995	-0.354041	-0.060372	-0.439962	-0.891121	-0.75703	-0.911587	-0.705199	-0.192643		-0.123075	-0.341535	0.164381	-0.622921	-0.133055	-0.304632	-1.09789	-0.188397	-0.173686	-0.655947	0.432518	0.855749	-0.455313	0.0434373	0.755731	0.0189896	-0.690568	-0.031472	-0.504332	-0.533429	-0.236491	0.0107815	-0.283168	1.87981	0.40402	0.397252
-1.45514		1.42225	-0.247552	0.404727	-0.735119	1.87217	-0.852844	0.0699439	0.0482488	0.00341187	-0.283507	0.984628	-0.557731	0.183841	-0.279826	-0.00316644	-0.398316	-0.909254	-0.733863	-0.939185	-0.679644	-0.260533		-0.02304	-0.370591	0.19376	-0.437745	-0.12155	-0.234961	-1.08044	-0.239793	-0.138194	-0.752898	0.529549	0.805323	-0.46958	0.0552367	0.775916	0.199461	-0.530515	0.0869599	-0.480742	-0.443735	-0.0600729	0.0369897	-0.342458	1.70569	0.441329	0.491508
-1.40496		1.36896	-0.336726	0.468596	-0.758602	1.80836	-0.792775	0.0852058	0.0894572	0.0138534	-0.351732	0.800165	-0.386581	0.268519	-0.184401	0.00379984	-0.325251	-0.961023	-0.76255	-0.869347	-0.614496	-0.263599		0.128944	-0.3978	0.059759	-0.346032	-0.11921	-0.194242	-1.10848	-0.318798	-0.0944844	-0.763978	0.668204	0.770018	-0.505283	0.0377217	0.76637	0.320709	-0.387883	0.127743	-0.495483	-0.325545	0.111655	0.148494	-0.418072	1.63696	0.476476	0.649659
-1.35478		1.33987	-0.409227	0.446456	-0.787775	1.75025	-0.668238	0.063304	0.0814675	0.0269631	-0.399277	0.628033	-0.220449	0.480528	-0.12374	-0.0575509	-0.289414	-1.04418	-0.879332	-0.758084	-0.503621	-0.211096		0.249893	-0.35209	-0.171884	-0.403193	-0.175064	-0.210724	-1.16868	-0.367113	-0.0232543	-0.697996	0.732041	0.747541	-0.554824	0.0011367	0.763801	0.342012	-0.358489	0.145772	-0.521382	-0.276285	0.115599	0.113662	-0.446024	1.66059	0.519463	0.750342
-1.30461		1.35306	-0.434882	0.41147	-0.758931	1.75822	-0.591307	0.0155981	0.0326337	0.027392	-0.425101	0.552984	-0.164224	0.578653	-0.15148	-0.114904	-0.336666	-1.06258	-0.995229	-0.706612	-0.349754	-0.136987		0.317461	-0.255093	-0.315329	-0.481673	-0.226645	-0.219266	-1.21732	-0.348217	0.0449827	-0.638124	0.674067	0.69709	-0.576069	-0.0217712	0.773961	0.38084	-0.389042	0.238072	-0.536774	-0.262152	-0.00219819	-0.0747183	-0.434169	1.61977	0.528276	0.70069
-1.25443		1.37137	-0.394829	0.432261	-0.670391	1.77379	-0.593042	-0.0234354	-0.000961073	0.024834	-0.411611	0.559643	-0.215507	0.473612	-0.234646	-0.0863076	-0.447233	-0.974965	-1.01167	-0.75007	-0.189685	-0.0512382		0.364141	-0.240841	-0.322601	-0.481995	-0.191285	-0.175224	-1.24606	-0.298916	0.0650702	-0.648522	0.533853	0.634503	-0.53639	-0.0104356	0.78335	0.410837	-0.437513	0.340601	-0.524484	-0.179398	-0.0821491	-0.165567	-0.420382	1.43321	0.484368	0.557263
-1.20425		1.31675	-0.331902	0.482316	-0.612634	1.68108	-0.623949	-0.0311584	0.00549931	0.0297224	-0.347224	0.55807	-0.275586	0.2807	-0.304812	0.0409769	-0.561158	-0.877485	-0.95245	-0.814258	-0.088508	0.0460771		0.376776	-0.37192	-0.32312	-0.430237	-0.112776	-0.138532	-1.28245	-0.278324	0.0632232	-0.679456	0.393395	0.604495	-0.446144	0.0275857	0.78653	0.293083	-0.544714	0.300798	-0.485264	-0.014108	-0.0635533	-0.024481	-0.398483	1.23896	0.436381	0.444046
-1.15407		1.19309	-0.328788	0.508541	-0.634117	1.50077	-0.66953	-0.0224873	0.0243997	0.0270375	-0.291489	0.47241	-0.263458	0.130853	-0.341009	0.204735	-0.64564	-0.866912	-0.919736	-0.816602	-0.0829569	0.141122		0.291018	-0.514816	-0.403435	-0.358725	-0.103923	-0.145401	-1.33625	-0.291159	0.103116	-0.618617	0.309434	0.596292	-0.341084	0.0679991	0.781692	0.0991096	-0.670362	0.118275	-0.463965	0.138583	-0.0228475	0.187787	-0.360419	1.19672	0.428993	0.387696
-1.1039		1.09606	-0.396768	0.53146	-0.655652	1.38572	-0.746988	-0.0336925	0.0293112	0.00103973	-0.325029	0.329776	-0.204044	0.0467914	-0.349439	0.308	-0.7211	-0.902974	-0.946926	-0.778503	-0.128609	0.237493		0.112581	-0.486834	-0.498132	-0.267155	-0.174452	-0.110282	-1.38513	-0.300594	0.169737	-0.454992	0.271136	0.554737	-0.248225	0.0903195	0.769004	0.0617096	-0.63917	-0.0441722	-0.492873	0.193385	-0.0372344	0.287681	-0.346935	1.24172	0.442397	0.312048
-1.05372		1.0774	-0.459702	0.600203	-0.59932	1.41722	-0.814426	-0.0741141	0.0266786	-0.0298502	-0.42512	0.231321	-0.185828	-0.00350221	-0.320665	0.278607	-0.812395	-0.901958	-0.971222	-0.775801	-0.140719	0.373934		-0.03403	-0.278243	-0.525816	-0.223129	-0.235633	0.0273628	-1.41242	-0.299546	0.179754	-0.322069	0.220728	0.456459	-0.177941	0.0908636	0.761574	0.176846	-0.395176	-0.0863657	-0.520606	0.146707	-0.0834897	0.301415	-0.38762	1.20493	0.441296	0.18173
-1.00354		1.09098	-0.476992	0.692926	-0.535615	1.52341	-0.799984	-0.111765	0.0285435	-0.0324267	-0.468263	0.225367	-0.25707	-0.0430175	-0.258221	0.136958	-0.902792	-0.896371	-0.946955	-0.806709	-0.100065	0.56136		-0.0439352	-0.0326709	-0.494946	-0.316603	-0.261665	0.170518	-1.42341	-0.321671	0.114306	-0.327307	0.121662	0.331892	-0.132466	0.0784247	0.77212	0.205178	-0.168188	-0.0777142	-0.491233	0.0487312	-0.0784535	0.315152	-0.453563	1.0895	0.436335	0.059915
-0.953365		1.09035	-0.491621	0.749648	-0.593014	1.61184	-0.712064	-0.120006	0.0331249	-0.00625409	-0.381289	0.259581	-0.388172	-0.0883582	-0.194117	0.00324857	-0.966254	-0.976995	-0.906573	-0.794442	-0.072783	0.737469		0.0253118	0.14672	-0.438285	-0.47927	-0.314585	0.206884	-1.42102	-0.379584	0.046941	-0.409643	0.0030335	0.226355	-0.106626	0.0557527	0.789819	0.123717	-0.22059	-0.123767	-0.467649	-0.0397205	0.0173261	0.299949	-0.521332	1.01125	0.453835	0.003696
-0.903188		1.08691	-0.52523	0.777494	-0.757891	1.66237	-0.624235	-0.114638	0.0432861	0.0166946	-0.239181	0.268259	-0.505413	-0.136618	-0.135687	-0.0153428	-1.0188	-1.11517	-0.891191	-0.712102	-0.105328	0.838102		0.0329407	0.250014	-0.364758	-0.53515	-0.395679	0.179816	-1.39768	-0.433538	0.0242919	-0.446343	-0.0768942	0.164426	-0.0867926	0.013005	0.79715	0.204694	-0.515089	-0.22141	-0.543313	-0.0813578	0.158126	0.238655	-0.605076	0.935258	0.482935	-0.02075
-0.853011		1.0907	-0.529802	0.841559	-0.881058	1.65976	-0.568027	-0.123518	0.0685387	0.0202519	-0.176844	0.240135	-0.540074	-0.152973	-0.0578866	0.0435285	-1.08603	-1.17888	-0.887758	-0.618923	-0.155226	0.877931		-0.040607	0.260075	-0.310169	-0.474155	-0.412704	0.184652	-1.36111	-0.437863	0.0121276	-0.43613	-0.108732	0.137185	-0.0606963	-0.0514658	0.80287	0.538379	-0.772676	-0.273476	-0.646625	-0.100224	0.276306	0.252559	-0.673136	0.735836	0.504136	-0.07835
-0.802834		1.08024	-0.488259	0.969624	-0.876933	1.55824	-0.533465	-0.143784	0.096755	0.0217245	-0.224697	0.183486	-0.488484	-0.132131	0.0191845	0.0284067	-1.13035	-1.12474	-0.864182	-0.566215	-0.159635	0.90469		-0.0728426	0.160829	-0.324666	-0.480898	-0.348563	0.192245	-1.34553	-0.392923	-0.017857	-0.467346	-0.146146	0.112298	-0.0290082	-0.116914	0.825907	0.83412	-0.803371	-0.207031	-0.597467	-0.161132	0.370735	0.423399	-0.630613	0.489768	0.547944	-0.16988
-0.752657		1.0549	-0.458547	1.13583	-0.806283	1.38109	-0.544748	-0.155905	0.0993129	0.030603	-0.279442	0.0984946	-0.443569	-0.133533	0.0233697	-0.141187	-1.07549	-1.04955	-0.818679	-0.538798	-0.118743	0.91649		-0.00601583	0.0458405	-0.381817	-0.628769	-0.3296	0.121954	-1.38389	-0.336355	-0.036778	-0.549565	-0.229936	0.0741352	-0.00457642	-0.166236	0.852334	0.851363	-0.672984	-0.0785999	-0.376344	-0.274372	0.497054	0.620643	-0.463663	0.418087	0.663707	-0.23955
-0.70248		1.04059	-0.461458	1.31484	-0.743522	1.26176	-0.622387	-0.158547	0.0778396	0.021331	-0.254935	0.00558782	-0.50313	-0.185793	-0.051608	-0.366163	-0.917557	-1.03068	-0.771403	-0.495735	-0.0706837	0.891091		0.0390865	0.0517502	-0.39874	-0.745868	-0.432209	0.0181289	-1.47175	-0.30198	-0.0234228	-0.60141	-0.329787	0.0506241	-0.000341482	-0.2131	0.847737	0.717035	-0.574876	-0.0617066	-0.166537	-0.363309	0.659972	0.676541	-0.311417	0.517872	0.824244	-0.2593
-0.652303		1.02366	-0.425458	1.48364	-0.663074	1.29977	-0.693074	-0.160834	0.070469	-0.0223948	-0.201463	-0.0708575	-0.621684	-0.221333	-0.102543	-0.474889	-0.750278	-1.03001	-0.744249	-0.414649	-0.0302981	0.855424		-0.067483	0.153021	-0.358144	-0.689197	-0.533756	0.00616387	-1.55879	-0.299355	-0.00368859	-0.589181	-0.389572	0.0658222	-0.0157519	-0.275298	0.816221	0.642327	-0.610163	-0.266521	-0.0795994	-0.371879	0.763041	0.618691	-0.296868	0.549557	0.922266	-0.27305
-0.602125		0.952163	-0.311424	1.59794	-0.514079	1.429	-0.663208	-0.158477	0.0971877	-0.055249	-0.198299	-0.15502	-0.642592	-0.194366	-0.0597984	-0.401842	-0.649491	-0.995478	-0.75773	-0.303093	0.00954414	0.847503		-0.271009	0.175846	-0.313113	-0.570143	-0.485718	0.105586	-1.58612	-0.316111	0.00151298	-0.563582	-0.40331	0.0702993	-0.031665	-0.333689	0.80705	0.599661	-0.698963	-0.560083	-0.0093963	-0.345696	0.709233	0.561692	-0.360033	0.440823	0.897315	-0.3449
-0.551948		0.822107	-0.199903	1.638	-0.346202	1.50563	-0.572311	-0.145254	0.134438	-0.00720145	-0.180149	-0.269227	-0.522488	-0.179345	-0.00303193	-0.228766	-0.58723	-0.958167	-0.809545	-0.209182	0.0537424	0.836887		-0.416741	0.0482668	-0.278044	-0.563786	-0.355018	0.20711	-1.55264	-0.325197	0.00168014	-0.563128	-0.408423	-0.0222225	-0.0235221	-0.357167	0.846968	0.485746	-0.698468	-0.671105	0.150593	-0.34041	0.526319	0.479217	-0.367589	0.38941	0.815926	-0.46743
-0.501771		0.693076	-0.174916	1.65092	-0.285072	1.49168	-0.541591	-0.132879	0.157877	0.121647	-0.0231687	-0.336198	-0.411415	-0.235104	-0.0447255	-0.0858548	-0.501475	-0.974487	-0.857568	-0.192703	0.103253	0.761783		-0.472721	-0.12296	-0.226457	-0.636668	-0.335974	0.225817	-1.53484	-0.298035	-0.00645658	-0.579421	-0.424892	-0.206768	0.0116557	-0.362782	0.899545	0.390494	-0.59356	-0.519876	0.299245	-0.317028	0.349369	0.273847	-0.318598	0.468088	0.767129	-0.5501
-0.451594		0.598259	-0.202755	1.68083	-0.379655	1.4742	-0.576399	-0.135715	0.17082	0.242726	0.194166	-0.256329	-0.425174	-0.25981	-0.150896	-0.0506215	-0.398246	-1.04663	-0.867313	-0.24496	0.138832	0.631301		-0.542493	-0.263244	-0.185149	-0.638552	-0.459207	0.189744	-1.60153	-0.221908	-0.0415745	-0.611535	-0.4466	-0.357638	0.0447466	-0.401449	0.914265	0.473059	-0.51074	-0.325858	0.280077	-0.227458	0.289916	0.00147434	-0.303244	0.454992	0.72231	-0.52842
-0.401417		0.505255	-0.21457	1.69276	-0.521429	1.51224	-0.570856	-0.150469	0.173824	0.27592	0.21957	-0.0994183	-0.454311	-0.13143	-0.190628	-0.110983	-0.325905	-1.14605	-0.866267	-0.285558	0.111671	0.518592		-0.672081	-0.435264	-0.205312	-0.573962	-0.557508	0.173318	-1.71291	-0.10896	-0.0853372	-0.6643	-0.481351	-0.378748	0.0444301	-0.475321	0.888762	0.685455	-0.532085	-0.309891	0.148595	-0.144195	0.349654	-0.16297	-0.309949	0.228439	0.592538	-0.45994
-0.35124		0.387343	-0.234189	1.63484	-0.55391	1.54203	-0.516209	-0.168636	0.150605	0.236682	0.00406649	-0.0738692	-0.332341	0.0727649	-0.146821	-0.18125	-0.289501	-1.24895	-0.895943	-0.280876	0.0133722	0.455919		-0.772132	-0.655057	-0.248273	-0.587141	-0.532661	0.196464	-1.75909	0.00513719	-0.0942816	-0.701767	-0.550629	-0.335571	0.0170698	-0.519903	0.855444	0.818348	-0.591185	-0.413291	0.126	-0.17381	0.444961	-0.1629	-0.251725	0.0336109	0.408283	-0.46022
-0.301063		0.270468	-0.316497	1.53285	-0.455655	1.4664	-0.530413	-0.18924	0.108418	0.202913	-0.147609	-0.250538	-0.103302	0.155119	-0.153047	-0.170196	-0.262289	-1.31377	-0.919032	-0.296353	-0.0622966	0.404089		-0.763181	-0.780569	-0.232605	-0.699344	-0.491604	0.20375	-1.70553	0.072716	-0.076007	-0.686865	-0.647261	-0.364274	-0.00115954	-0.489523	0.828492	0.777977	-0.594261	-0.434218	0.307252	-0.278858	0.488704	-0.116334	-0.173671	0.123885	0.321006	-0.55773
-0.250886		0.185775	-0.416121	1.4446	-0.365522	1.29521	-0.642888	-0.203614	0.088433	0.218575	0.041993	-0.453016	0.0444928	0.0524059	-0.291631	-0.0639758	-0.255791	-1.30026	-0.841884	-0.377725	-0.0222902	0.334299		-0.69996	-0.708409	-0.192205	-0.747422	-0.55541	0.13879	-1.62929	0.0642484	-0.0885461	-0.65769	-0.730961	-0.480273	0.0055273	-0.414715	0.796874	0.669741	-0.540089	-0.336515	0.55287	-0.333683	0.461216	-0.138855	-0.230205	0.371931	0.393383	-0.6693
-0.200708		0.132054	-0.442846	1.36276	-0.40187	1.14244	-0.730949	-0.193094	0.103834	0.260424	0.454964	-0.497997	0.0631335	-0.134732	-0.46696	0.0710428	-0.296715	-1.2525	-0.637289	-0.462672	0.0729439	0.275971		-0.692881	-0.544487	-0.249223	-0.622388	-0.668849	0.0390835	-1.58521	-0.00186735	-0.150982	-0.6872	-0.767444	-0.571411	0.0134839	-0.345381	0.756703	0.619574	-0.460688	-0.252478	0.690293	-0.333123	0.417854	-0.220482	-0.413947	0.489086	0.500206	-0.70913
-0.150531		0.106744	-0.418941	1.24596	-0.511148	1.08401	-0.734802	-0.160188	0.108266	0.286518	0.778303	-0.421334	0.0866036	-0.319053	-0.544508	0.17274	-0.342319	-1.27982	-0.386783	-0.482958	0.0790044	0.253269		-0.762171	-0.44758	-0.418567	-0.421383	-0.702027	0.0148456	-1.52153	-0.0748784	-0.215399	-0.775942	-0.743896	-0.579368	-0.000991938	-0.279464	0.716114	0.63784	-0.350512	-0.232942	0.706375	-0.376218	0.415292	-0.27765	-0.513642	0.44676	0.50287	-0.66387
-0.100354		0.119228	-0.447971	1.1083	-0.555347	1.06919	-0.75328	-0.135717	0.0646222	0.284522	0.939577	-0.371258	0.188068	-0.473678	-0.530691	0.234306	-0.307396	-1.39286	-0.187066	-0.478345	-0.0109553	0.223776		-0.830076	-0.422944	-0.568469	-0.297271	-0.654601	0.0891412	-1.38967	-0.124764	-0.240791	-0.851645	-0.660974	-0.58135	-0.0300478	-0.188755	0.67223	0.68902	-0.235274	-0.186452	0.690348	-0.452132	0.437408	-0.245867	-0.423752	0.424314	0.427665	-0.57263
-0.0501771		0.148475	-0.523923	0.998026	-0.505146	1.00455	-0.836141	-0.136758	0.00828341	0.272699	1.12242	-0.382895	0.259559	-0.54146	-0.528308	0.271086	-0.192288	-1.42809	-0.0585073	-0.524137	-0.0523878	0.134105		-0.834219	-0.410433	-0.593805	-0.27188	-0.639139	0.120966	-1.25855	-0.160612	-0.239901	-0.865774	-0.552482	-0.654266	-0.0570049	-0.0842091	0.61586	0.793597	-0.212745	-0.0734405	0.685049	-0.440063	0.431186	-0.124147	-0.291847	0.479503	0.384075	-0.49355
-3.55271e-15		0.137818	-0.503024	0.923979	-0.45613	0.887044	-0.86058	-0.145074	-0.00639547	0.277758	1.42348	-0.374355	0.185242	-0.481402	-0.561254	0.296814	-0.100539	-1.2102	0.0444938	-0.602234	0.0307059	0.0245329		-0.79499	-0.456256	-0.516502	-0.267491	-0.690452	-0.00878546	-1.22237	-0.191464	-0.240341	-0.834419	-0.496302	-0.7512	-0.0823036	-0.00669849	0.562094	0.980607	-0.31896	0.0207316	0.681355	-0.341072	0.408999	0.0180405	-0.243529	0.522894	0.380529	-0.47599
0.0501771		0.0641063	-0.30018	0.875533	-0.469918	0.796893	-0.729598	-0.144607	0.00565919	0.315488	1.72056	-0.303471	0.0265035	-0.406143	-0.530581	0.345867	-0.0947803	-0.749867	0.168834	-0.627579	0.166618	0.0282221		-0.766374	-0.615954	-0.402766	-0.218498	-0.698646	-0.175902	-1.24495	-0.20069	-0.246882	-0.793671	-0.540262	-0.773699	-0.103752	0.0381761	0.546704	1.18382	-0.420319	0.0487867	0.698407	-0.291885	0.456694	0.0983824	-0.164663	0.52939	0.329679	-0.50732
0.100354		-0.0236311	-0.000172641	0.871891	-0.498529	0.778125	-0.530231	-0.148933	-0.0161493	0.377733	1.87786	-0.220182	-0.0305785	-0.494232	-0.339837	0.453248	-0.113877	-0.224358	0.314827	-0.568146	0.305515	0.243396		-0.761249	-0.771474	-0.289336	-0.067349	-0.54779	-0.122073	-1.2101	-0.176802	-0.249981	-0.759576	-0.607959	-0.690504	-0.095661	0.0990229	0.582875	1.27706	-0.355241	0.0665366	0.76876	-0.294439	0.627219	0.125089	0.0819356	0.561804	0.202538	-0.51119
0.150531		-0.0671714	0.27277	0.916452	-0.478406	0.794359	-0.371933	-0.170721	-0.077639	0.438441	1.89775	-0.185745	0.129251	-0.730583	-0.0127069	0.588287	-0.0848428	0.199341	0.42862	-0.468964	0.498116	0.624275		-0.753161	-0.748716	-0.206054	0.257204	-0.250812	0.215783	-1.10676	-0.140043	-0.228267	-0.722562	-0.539567	-0.511173	-0.037732	0.230694	0.646003	1.2173	-0.152077	0.0784266	0.870448	-0.162996	0.876904	0.198958	0.396365	0.650824	0.073427	-0.45676
0.200708		-0.0785723	0.489773	0.944907	-0.412947	0.804661	-0.224787	-0.195312	-0.114492	0.485156	1.83259	-0.210314	0.439996	-0.894141	0.318891	0.669813	-0.0429841	0.471768	0.449318	-0.374076	0.74571	1.02026		-0.732726	-0.580867	-0.168402	0.744622	0.0787408	0.643396	-1.04537	-0.112975	-0.141828	-0.649165	-0.257565	-0.209084	0.0492743	0.446196	0.712341	1.08631	0.00974599	0.00373037	0.965135	0.158633	1.12126	0.375825	0.585904	0.809205	0.010399	-0.42372
0.250886		-0.122189	0.661784	0.898749	-0.336443	0.8138	-0.0479554	-0.207647	-0.0868341	0.538124	1.68553	-0.254391	0.730422	-0.855495	0.524424	0.673659	-0.0665461	0.633471	0.38927	-0.278099	0.936271	1.31846		-0.722721	-0.460178	-0.122575	1.23031	0.343625	1.00062	-1.07871	-0.0871045	0.0271401	-0.500528	0.143695	0.227235	0.124295	0.711955	0.786754	0.986196	0.0473771	-0.11361	1.08214	0.4465	1.30917	0.593086	0.644878	1.07187	0.003756	-0.4769
0.301063		-0.221701	0.751061	0.820965	-0.267357	0.828071	0.0790539	-0.215636	-0.0356405	0.621344	1.46475	-0.251659	0.901842	-0.736676	0.57747	0.666736	-0.147318	0.742487	0.354428	-0.154014	1.01419	1.52295		-0.73459	-0.44188	0.0120917	1.52027	0.530256	1.33335	-1.11664	-0.044321	0.219106	-0.271911	0.495466	0.694033	0.174569	0.97357	0.873814	0.960943	0.0536357	-0.0607938	1.26379	0.501904	1.43245	0.776018	0.70907	1.37887	0.025169	-0.52731
0.35124		-0.321714	0.728939	0.804919	-0.226587	0.820391	0.101324	-0.224818	-0.0200058	0.724498	1.25425	-0.16096	1.00113	-0.702117	0.558234	0.706556	-0.210315	0.819369	0.451616	0.00104193	1.07196	1.68601		-0.747743	-0.395581	0.212393	1.57811	0.687685	1.70573	-1.05922	0.00943178	0.333011	-0.00615756	0.708115	1.0287	0.219594	1.18581	0.948825	1.01632	0.0992142	0.232378	1.44315	0.418527	1.50679	0.932995	0.817989	1.53767	0.093053	-0.42984
0.401417		-0.364552	0.661923	0.86716	-0.245672	0.770631	0.119227	-0.221674	-0.0394946	0.818348	1.15102	-0.0326025	1.09143	-0.732453	0.552838	0.762275	-0.226012	0.832951	0.676714	0.153879	1.18494	1.8017		-0.745908	-0.268508	0.342451	1.52699	0.852401	2.03209	-0.928921	0.0607182	0.341611	0.240262	0.806237	1.18317	0.270689	1.32957	0.991438	1.1198	0.101974	0.51242	1.49832	0.390684	1.55823	1.08737	0.891684	1.46308	0.232935	-0.18507
0.451594		-0.378212	0.65479	0.938541	-0.328199	0.702737	0.217189	-0.205766	-0.0537649	0.897948	1.14562	0.0146151	1.12466	-0.71188	0.564536	0.767977	-0.22074	0.749362	0.916702	0.264349	1.28095	1.82025		-0.74021	-0.193343	0.327621	1.49253	0.990372	2.22533	-0.819045	0.120455	0.335665	0.436412	0.852134	1.26888	0.31287	1.41184	1.03023	1.16676	-0.0106736	0.515708	1.43473	0.427346	1.60151	1.20141	0.901435	1.34417	0.403391	0.077551
0.501771		-0.440608	0.733289	0.972096	-0.438516	0.654867	0.293414	-0.204835	-0.0519971	0.974523	1.11724	-0.0705448	1.04259	-0.626779	0.5434	0.709772	-0.201199	0.595923	1.05961	0.326502	1.26429	1.75382		-0.7383	-0.262058	0.27488	1.50915	1.04118	2.3589	-0.774796	0.203318	0.421654	0.588043	0.884325	1.40801	0.3373	1.459	1.11026	1.06261	-0.130159	0.326486	1.38275	0.437746	1.62749	1.23623	0.928116	1.40057	0.513437	0.2889
0.551948		-0.563296	0.837842	0.99204	-0.536181	0.633092	0.224661	-0.229549	-0.0604653	1.0288	0.96938	-0.188942	0.933536	-0.547701	0.485428	0.630104	-0.149408	0.442269	1.08357	0.370576	1.16236	1.68938		-0.725082	-0.362176	0.343462	1.55205	1.02826	2.53468	-0.781647	0.283578	0.596376	0.722794	0.92071	1.60515	0.373053	1.50592	1.22152	0.878858	-0.100703	0.222274	1.38639	0.459969	1.62342	1.21827	1.05186	1.56485	0.515499	0.472047
0.602125		-0.670966	0.90877	1.02507	-0.586761	0.610116	0.0870519	-0.245005	-0.0888024	1.02083	0.745108	-0.201698	0.930671	-0.483705	0.459335	0.580606	-0.0785549	0.318596	1.03827	0.415516	1.06387	1.67012		-0.693418	-0.347357	0.525531	1.57916	1.05942	2.71557	-0.82593	0.30917	0.760488	0.853788	0.96944	1.79839	0.46192	1.57305	1.30621	0.807676	0.0510681	0.269336	1.32981	0.593656	1.58535	1.19886	1.25079	1.59427	0.444769	0.601169
0.652303		-0.710592	0.93195	1.04446	-0.551314	0.561379	0.0430713	-0.219156	-0.108393	0.957702	0.570926	-0.107631	0.997153	-0.382392	0.518731	0.592905	-0.0227764	0.200942	0.961601	0.439919	1.00423	1.63635		-0.65812	-0.253174	0.644783	1.54938	1.17984	2.83209	-0.902486	0.265534	0.849294	0.951355	1.01403	1.96896	0.601787	1.6512	1.33913	0.906642	0.171884	0.296477	1.12696	0.780795	1.49966	1.21209	1.40886	1.44629	0.361398	0.594938
0.70248		-0.720341	0.917731	1.01656	-0.423399	0.499082	0.0926668	-0.172431	-0.0957862	0.902515	0.500302	-0.0400601	0.996005	-0.243032	0.611419	0.660426	0.0182446	0.0806429	0.839501	0.422428	0.987924	1.53293		-0.619685	-0.222195	0.577431	1.46832	1.30333	2.93221	-0.980349	0.196043	0.902598	0.976367	1.01507	2.13053	0.742108	1.72742	1.34931	1.02588	0.216363	0.213255	0.860447	0.849275	1.35516	1.28124	1.41529	1.34757	0.293539	0.477272
0.752657		-0.761138	0.877897	0.959649	-0.280679	0.465507	0.0947687	-0.147393	-0.0719946	0.894081	0.471178	-0.0798345	0.94838	-0.125957	0.612927	0.723609	0.0651361	-0.0111237	0.657291	0.388932	1.03539	1.41214		-0.554849	-0.282472	0.384833	1.40541	1.34937	3.06974	-1.02003	0.147532	0.986526	0.946878	0.951957	2.24581	0.847925	1.82291	1.35143	1.07246	0.263118	0.121559	0.662741	0.751869	1.19506	1.375	1.27998	1.46942	0.250084	0.388975
0.802834		-0.834719	0.82851	0.913309	-0.241052	0.478618	-0.0194473	-0.153107	-0.0773418	0.905248	0.421414	-0.15467	1.0109	-0.066888	0.465529	0.703676	0.104993	-0.0635475	0.466238	0.38165	1.12447	1.36706		-0.467059	-0.321152	0.196453	1.40391	1.36585	3.1563	-1.02875	0.119057	1.09165	0.928346	0.850078	2.23919	0.937961	1.97269	1.31497	1.18802	0.321906	0.112445	0.562437	0.607711	1.09958	1.37206	1.1279	1.69217	0.242378	0.388168
0.853011		-0.906779	0.794252	0.880144	-0.339666	0.499412	-0.185931	-0.170135	-0.115078	0.906456	0.366802	-0.167727	1.19007	-0.0586392	0.256438	0.584057	0.107988	-0.11271	0.354797	0.391556	1.15634	1.40993		-0.404406	-0.261429	0.0509531	1.40446	1.43677	3.09156	-1.05265	0.0815652	1.15305	0.946671	0.747991	2.10111	1.03289	2.16488	1.22764	1.50935	0.299682	0.158626	0.513138	0.511117	1.08149	1.20599	1.04255	1.76697	0.261933	0.376512
0.903188		-0.966459	0.794071	0.84253	-0.478787	0.488594	-0.320912	-0.187618	-0.141595	0.914642	0.330496	-0.145637	1.30516	-0.0870356	0.120895	0.44263	0.0830499	-0.182736	0.347706	0.366216	1.06656	1.47686		-0.400267	-0.161386	-0.0851316	1.33458	1.54187	2.94513	-1.10461	0.0305338	1.14348	0.966456	0.650137	1.91826	1.10076	2.33999	1.13364	1.8812	0.183151	0.226075	0.484072	0.429694	1.06303	1.04056	0.974697	1.616	0.271519	0.280544
0.953365		-1.02328	0.819101	0.804532	-0.523494	0.473527	-0.396433	-0.203105	-0.120765	0.936608	0.275249	-0.180182	1.28701	-0.108893	0.0886688	0.368861	0.0661017	-0.249753	0.380575	0.291083	0.927708	1.51419		-0.435855	-0.109264	-0.211662	1.23128	1.60053	2.84213	-1.1449	-0.00689328	1.09287	0.969857	0.533902	1.77943	1.10353	2.46115	1.07335	2.01719	0.105218	0.302434	0.461818	0.310674	1.00093	1.12872	0.868796	1.37491	0.248103	0.171621
1.00354		-1.07605	0.835578	0.764364	-0.433814	0.497833	-0.434157	-0.203988	-0.0723235	0.920689	0.169945	-0.282192	1.30435	-0.0370009	0.0836384	0.352531	0.0642121	-0.291729	0.394675	0.22215	0.868668	1.50602		-0.488988	-0.0954056	-0.290584	1.17388	1.61095	2.7633	-1.15316	-0.0142423	1.02989	0.98689	0.396571	1.6937	1.07524	2.5452	1.03356	1.88896	0.171875	0.304555	0.434078	0.183092	0.959794	1.46394	0.791125	1.18115	0.204708	0.131732
1.05372		-1.11678	0.82499	0.683336	-0.286173	0.526288	-0.485051	-0.180862	-0.0469067	0.830683	0.066819	-0.386053	1.50249	0.155484	0.0578868	0.294923	0.0525833	-0.331019	0.404541	0.217794	0.920473	1.45202		-0.577266	-0.0493802	-0.314191	1.13524	1.66307	2.63808	-1.17204	-0.00995083	0.964321	1.02642	0.270276	1.61908	1.09104	2.61234	0.991415	1.73732	0.323453	0.167005	0.409507	0.105497	0.996633	1.74406	0.819972	1.03574	0.151661	0.122089
1.1039		-1.14407	0.815981	0.550266	-0.178908	0.487715	-0.577788	-0.149363	-0.0605935	0.728404	0.0413796	-0.45948	1.77997	0.3453	0.0370209	0.147404	0.0170821	-0.397484	0.436431	0.268216	1.00543	1.36823		-0.715068	0.0309704	-0.308301	1.02364	1.81854	2.53958	-1.24176	-0.0177168	0.927903	1.05936	0.185641	1.53256	1.16178	2.65104	0.955873	1.70534	0.418348	0.0410923	0.389828	0.0717754	1.04533	1.74527	0.883421	0.893634	0.080265	0.073021
1.15407		-1.15453	0.855455	0.438547	-0.150738	0.402081	-0.660469	-0.136447	-0.0812389	0.706312	0.0855505	-0.51548	1.92352	0.382975	0.0261082	-0.00453694	-0.0319467	-0.483197	0.458211	0.317148	1.05558	1.28506		-0.859321	0.0642407	-0.28017	0.849595	2.01647	2.57539	-1.32901	-0.0286128	0.966325	1.09758	0.140165	1.44384	1.21905	2.65441	0.928277	1.68846	0.383684	0.1645	0.323197	0.0273545	1.00056	1.57526	0.847162	0.774063	0.006628	0.004288
1.20425		-1.14426	0.948095	0.416885	-0.195613	0.357645	-0.655482	-0.154717	-0.0814408	0.756657	0.117105	-0.541408	1.84985	0.295057	-0.020186	-0.0438578	-0.0808037	-0.560197	0.433338	0.328859	1.07245	1.21463		-0.943876	0.00597417	-0.217233	0.721456	2.11323	2.65217	-1.37003	-0.011172	1.06108	1.19527	0.111827	1.35993	1.21295	2.64744	0.87716	1.59363	0.255201	0.476421	0.173725	-0.0372861	0.865516	1.47288	0.722543	0.697172	-0.02432	-0.03182
1.25443		-1.13317	1.04437	0.437522	-0.302682	0.358362	-0.587734	-0.201963	-0.0730653	0.784071	0.0764781	-0.50522	1.63474	0.247346	-0.0924694	0.0202045	-0.125739	-0.613753	0.406161	0.303023	1.07222	1.1465		-0.959573	-0.0841958	-0.134392	0.679331	2.03643	2.57586	-1.36077	0.0453177	1.10636	1.3381	0.0834974	1.26311	1.17312	2.64739	0.797955	1.50336	0.135409	0.612306	0.0217198	-0.064214	0.734809	1.50212	0.647297	0.601236	-0.01434	-0.04388
1.30461		-1.16107	1.09254	0.403512	-0.434387	0.314422	-0.574021	-0.266229	-0.0768577	0.744713	-0.0261526	-0.424415	1.39486	0.301812	-0.09887	0.0707407	-0.167452	-0.634756	0.462863	0.243887	1.04029	1.08323		-0.963875	-0.129919	-0.0747891	0.651998	1.89267	2.35582	-1.35392	0.11426	1.01283	1.43813	0.038429	1.12988	1.15906	2.63059	0.74657	1.45946	0.129342	0.383676	-0.0222828	-0.0167403	0.667028	1.55868	0.674101	0.446114	-0.03667	-0.05906
1.35478		-1.2372	1.08799	0.313702	-0.509385	0.203714	-0.662733	-0.317107	-0.0882893	0.696446	-0.141993	-0.362569	1.21337	0.339334	-0.0122047	0.0564507	-0.200068	-0.609316	0.619749	0.156773	0.967139	1.03719		-1.00459	-0.138839	-0.0492466	0.579678	1.8566	2.19237	-1.37813	0.159394	0.823716	1.48304	-0.0387565	0.969143	1.19234	2.57032	0.764657	1.31581	0.251315	0.0354557	0.00523256	0.0521483	0.641205	1.57103	0.711551	0.329954	-0.13953	-0.06364
1.40496		-1.31142	1.06662	0.242579	-0.483949	0.114131	-0.774286	-0.316442	-0.0917348	0.696524	-0.229457	-0.359024	1.12539	0.263066	0.0459011	0.0551499	-0.208208	-0.545619	0.801197	0.0690465	0.886919	0.995375		-1.06295	-0.164901	-0.0117976	0.471575	1.94697	2.16925	-1.40833	0.165695	0.685323	1.57039	-0.120223	0.831101	1.25547	2.48382	0.81654	1.00153	0.381588	-0.10628	-0.040415	0.0565189	0.607142	1.56051	0.689283	0.347766	-0.27328	-0.05636
1.45514		-1.32587	1.05887	0.209329	-0.428296	0.090129	-0.82882	-0.260082	-0.0833097	0.721037	-0.284634	-0.399376	1.1169	0.150636	-0.0455408	0.129544	-0.186576	-0.490571	0.920192	0.0147258	0.848326	0.94677		-1.09051	-0.208987	0.0742606	0.341998	2.01453	2.16456	-1.41516	0.142689	0.688591	1.73099	-0.123552	0.759953	1.32691	2.4117	0.846621	0.721613	0.384652	-0.0458032	-0.196185	-0.0261882	0.526114	1.54814	0.661615	0.389232	-0.36192	-0.0844
1.50531		-1.29093	1.056	0.176602	-0.442005	0.0708318	-0.841018	-0.192354	-0.0640777	0.720412	-0.349901	-0.445565	1.13976	0.125473	-0.239883	0.210083	-0.164186	-0.489031	0.950994	-0.00297692	0.863004	0.935402		-1.07588	-0.225444	0.17189	0.196327	1.97129	2.08237	-1.40441	0.113459	0.770284	1.8431	-0.00148939	0.739206	1.39615	2.36433	0.854334	0.642395	0.272096	-0.0152207	-0.350305	-0.150443	0.393282	1.50954	0.69732	0.27022	-0.40003	-0.15828
1.55549		-1.27236	1.02273	0.154856	-0.512921	0.0354019	-0.849789	-0.159876	-0.036723	0.698896	-0.473543	-0.474619	1.13112	0.178235	-0.389828	0.197406	-0.184283	-0.533643	0.945033	-0.00438502	0.897054	1.00647		-1.04023	-0.217676	0.217296	0.0906066	1.89415	1.9831	-1.40226	0.102666	0.801835	1.80927	0.176006	0.707994	1.4554	2.31456	0.86347	0.572272	0.168447	-0.104232	-0.425822	-0.259678	0.254254	1.41865	0.756157	0.0338434	-0.42518	-0.20607
1.60567		-1.2912	0.939555	0.192632	-0.551473	0.0733882	-0.84069	-0.164697	-0.0194583	0.692452	-0.636629	-0.498798	1.03434	0.215118	-0.429504	0.115615	-0.250634	-0.57701	1.0006	0.000759568	0.901401	1.10293		-0.990254	-0.255243	0.215311	0.106038	1.85477	1.94119	-1.42953	0.115266	0.752969	1.70565	0.298939	0.636045	1.49024	2.23927	0.859423	0.280243	0.12477	-0.181534	-0.468183	-0.310427	0.165123	1.28377	0.753958	-0.0980117	-0.44205	-0.17908
1.65584		-1.28717	0.818453	0.271145	-0.548667	0.222306	-0.792123	-0.177078	-0.0289829	0.702078	-0.741227	-0.548107	0.852157	0.212522	-0.411038	0.0633571	-0.32109	-0.590122	1.1824	0.00462581	0.85168	1.10915		-0.931002	-0.373087	0.225525	0.233193	1.80095	1.92502	-1.49192	0.120476	0.711284	1.65245	0.356726	0.5568	1.4837	2.14815	0.81174	-0.0364332	0.0784724	-0.139471	-0.527573	-0.285963	0.127287	1.14646	0.7029	-0.0610277	-0.44201	-0.13004
1.70602		-1.22062	0.675647	0.311066	-0.586347	0.349212	-0.735514	-0.175825	-0.0403542	0.694993	-0.710454	-0.619259	0.67405	0.218862	-0.404623	0.0512827	-0.361905	-0.589668	1.44058	-0.0239945	0.776444	1.00723		-0.910867	-0.509737	0.256862	0.352858	1.68885	1.87227	-1.57124	0.0797902	0.739366	1.63271	0.411941	0.517753	1.43521	2.06556	0.73033	0.000472222	0.00834962	-0.0520241	-0.582308	-0.231448	0.112023	1.0541	0.690978	0.000367484	-0.45926	-0.12224
1.7562		-1.15217	0.519541	0.2796	-0.681802	0.307193	-0.715845	-0.157537	-0.00933925	0.656117	-0.59561	-0.661124	0.579534	0.246108	-0.440015	0.00882343	-0.374523	-0.604844	1.64158	-0.106736	0.736815	0.894883		-0.978486	-0.583741	0.256432	0.367867	1.59556	1.77949	-1.62705	0.000920753	0.784022	1.55529	0.452644	0.523611	1.37107	1.9956	0.649632	0.346722	-0.00778305	-0.0510503	-0.612692	-0.217943	0.133104	1.00294	0.72537	0.0143926	-0.52451	-0.13478
1.80638		-1.14531	0.379197	0.207307	-0.738317	0.139203	-0.732387	-0.124353	0.0512931	0.603344	-0.536789	-0.630982	0.528938	0.261294	-0.512758	-0.052903	-0.364276	-0.635533	1.70242	-0.205936	0.754244	0.831872		-1.0901	-0.587921	0.220249	0.305993	1.60209	1.67476	-1.63226	-0.0639515	0.76513	1.42519	0.392415	0.54431	1.3214	1.91833	0.577467	0.606767	0.0547232	-0.15337	-0.641566	-0.220062	0.208849	0.918783	0.704695	0.0505464	-0.58129	-0.12623
1.85655		-1.14336	0.296739	0.118902	-0.686552	0.0186474	-0.757265	-0.0877709	0.0740324	0.560009	-0.597287	-0.536471	0.440794	0.266872	-0.576942	-0.0250971	-0.328723	-0.65973	1.6588	-0.256855	0.775021	0.771094		-1.13584	-0.563394	0.222699	0.255909	1.66764	1.5731	-1.60802	-0.0888943	0.697497	1.32952	0.235141	0.561052	1.28714	1.81923	0.502284	0.638549	0.0890901	-0.290726	-0.665764	-0.109487	0.269066	0.752288	0.599636	0.0873209	-0.5372	-0.12369
1.90673		-1.05263	0.256574	0.0289092	-0.582319	0.0266783	-0.775933	-0.0747341	0.0395388	0.5358	-0.6845	-0.403016	0.340063	0.298078	-0.561543	0.103234	-0.286982	-0.674328	1.58911	-0.247688	0.739728	0.677736		-1.07094	-0.524564	0.289885	0.238304	1.70584	1.48271	-1.60018	-0.109127	0.663723	1.2919	0.117598	0.582633	1.2466	1.70633	0.432366	0.640944	0.0221248	-0.436056	-0.638055	0.148376	0.21814	0.578395	0.558326	-0.00830771	-0.40322	-0.17309
1.95691		-0.915965	0.179811	-0.0265136	-0.520976	0.083516	-0.77349	-0.103986	0.0142813	0.526261	-0.683611	-0.239721	0.301604	0.340783	-0.458099	0.168104	-0.269945	-0.701645	1.52975	-0.228175	0.666358	0.619504		-0.951666	-0.473131	0.332562	0.196643	1.70801	1.40598	-1.62137	-0.158495	0.692954	1.24726	0.138037	0.617043	1.19454	1.59238	0.38512	0.680163	-0.0538468	-0.577555	-0.549457	0.375419	0.096301	0.517306	0.71744	-0.210949	-0.29756	-0.2497
2.00708		-0.873548	0.0473118	-0.0384482	-0.52613	0.0832737	-0.720999	-0.155935	0.0464472	0.513664	-0.62769	-0.0589551	0.292236	0.329903	-0.3571	0.0572688	-0.268516	-0.74662	1.49341	-0.241735	0.617727	0.677955		-0.842433	-0.452258	0.277275	0.107607	1.72292	1.32943	-1.643	-0.205934	0.727851	1.14865	0.237269	0.644195	1.15284	1.4799	0.349876	0.611439	-0.0287602	-0.61691	-0.453346	0.376073	0.0522221	0.55994	0.975065	-0.30598	-0.28806	-0.28681
2.05726		-0.954381	-0.0338552	-0.0664133	-0.562144	0.0108077	-0.62698	-0.185126	0.0889236	0.47891	-0.646445	0.108938	0.229853	0.240639	-0.331357	-0.0813807	-0.245068	-0.776825	1.50797	-0.278514	0.602797	0.833619		-0.770062	-0.510355	0.189672	0.0317562	1.767	1.24779	-1.64914	-0.19331	0.71514	1.01819	0.299928	0.63335	1.1346	1.37613	0.302073	0.488251	0.0425817	-0.466266	-0.37751	0.193558	0.129681	0.572334	1.10586	-0.208597	-0.31109	-0.26598
2.10744		-1.03527	0.0283289	-0.146579	-0.599307	-0.0837315	-0.572887	-0.166914	0.0825994	0.42588	-0.755941	0.234591	0.154861	0.114479	-0.329511	-0.00813338	-0.208545	-0.772413	1.58803	-0.287623	0.567356	0.992333		-0.760077	-0.62591	0.174343	0.0221671	1.80157	1.18364	-1.6686	-0.113798	0.683214	0.896203	0.289688	0.584955	1.11829	1.29941	0.246871	0.559144	0.0459749	-0.241971	-0.276716	0.0426472	0.203099	0.493328	1.07655	-0.0960393	-0.28676	-0.23175
2.15762		-1.02543	0.159427	-0.212022	-0.630929	-0.158877	-0.628846	-0.120734	0.0583607	0.381448	-0.813571	0.293328	0.160497	-0.0212837	-0.273162	0.269154	-0.215194	-0.772911	1.70815	-0.21678	0.482169	1.08246		-0.810656	-0.73372	0.20678	0.0400478	1.77804	1.14998	-1.73384	-0.0150443	0.701464	0.800789	0.23249	0.532354	1.07552	1.25112	0.208345	0.770014	0.0179866	-0.168719	-0.108154	0.0254287	0.169039	0.420351	1.06142	-0.146829	-0.23854	-0.23354
2.20779		-0.973589	0.215945	-0.197932	-0.661782	-0.200748	-0.740166	-0.085059	0.0822963	0.361282	-0.722495	0.266397	0.196389	-0.188455	-0.215432	0.486389	-0.272752	-0.829312	1.84464	-0.0599386	0.3892	1.08967		-0.832417	-0.806903	0.178003	0.0192213	1.69992	1.11897	-1.82412	0.0574062	0.77765	0.736912	0.145536	0.495867	1.01603	1.2063	0.178597	0.72365	0.0845768	-0.264553	0.0907826	0.0537086	0.0910213	0.444086	1.12213	-0.323021	-0.23771	-0.27751
2.25797		-0.95645	0.190107	-0.164531	-0.700148	-0.209867	-0.77079	-0.0787284	0.140421	0.351767	-0.57634	0.184057	0.139407	-0.375101	-0.279841	0.471666	-0.308473	-0.915741	2.00601	0.115324	0.348418	1.03897		-0.736596	-0.85167	0.0794632	-0.0251345	1.64501	1.06301	-1.87624	0.087133	0.8348	0.701055	0.04973	0.465047	0.984091	1.15576	0.122659	0.27693	0.234915	-0.32361	0.235089	0.0417211	0.0865071	0.49582	1.0863	-0.468152	-0.28979	-0.32331
2.30815		-0.960987	0.190328	-0.20568	-0.739178	-0.206234	-0.673546	-0.0894679	0.161018	0.333821	-0.52725	0.134557	0.0178017	-0.48733	-0.44896	0.344258	-0.266242	-0.943768	2.18462	0.212948	0.370709	0.978017		-0.590333	-0.856793	0.0134817	-0.0251187	1.68449	0.996674	-1.85844	0.077611	0.810317	0.672646	-0.00589846	0.438649	1.00416	1.12814	0.0425253	-0.208982	0.330568	-0.249922	0.278872	0.0262105	0.152192	0.455261	0.847079	-0.491287	-0.34564	-0.32663
2.35832		-0.929953	0.243435	-0.291944	-0.75504	-0.227018	-0.547298	-0.0923548	0.131633	0.304115	-0.592048	0.166581	-0.042136	-0.455494	-0.546728	0.299982	-0.178564	-0.882891	2.32111	0.20311	0.411634	0.943962		-0.549267	-0.828126	0.0113261	0.0225874	1.76773	0.940938	-1.81381	0.0485822	0.744334	0.62428	-0.00498346	0.441474	1.04455	1.13898	-0.00952085	-0.373752	0.325169	-0.180172	0.243675	0.0621273	0.185375	0.348519	0.590246	-0.431007	-0.377	-0.29843
2.4085		-0.859602	0.26203	-0.326149	-0.753769	-0.283529	-0.501863	-0.074749	0.110507	0.265699	-0.675865	0.217686	-0.0477505	-0.347882	-0.470118	0.349068	-0.101532	-0.814915	2.36785	0.153089	0.414224	0.920185		-0.618831	-0.834184	-0.0152969	0.046398	1.76018	0.882096	-1.80695	0.025518	0.720186	0.540832	-0.0166626	0.475903	1.05058	1.15155	-0.0053049	-0.282243	0.307322	-0.204055	0.174151	0.125457	0.138673	0.320056	0.554277	-0.419947	-0.37015	-0.30081
2.45868		-0.802977	0.215915	-0.311137	-0.790785	-0.335565	-0.537761	-0.0459721	0.122382	0.221955	-0.723214	0.20571	-0.0993354	-0.295806	-0.331295	0.392742	-0.0279282	-0.828523	2.35871	0.149746	0.359864	0.860813		-0.634159	-0.914711	-0.0916381	0.00837901	1.62383	0.812959	-1.83743	0.0110146	0.737571	0.423598	-0.121819	0.497776	1.01094	1.13076	0.0110588	-0.172064	0.316716	-0.198921	0.0895156	0.177129	0.07197	0.420394	0.692949	-0.547195	-0.29256	-0.36073
2.50886		-0.802879	0.186765	-0.335929	-0.889783	-0.348158	-0.591725	-0.0254811	0.122314	0.187425	-0.74917	0.144091	-0.161983	-0.323593	-0.309233	0.440496	0.0819307	-0.901452	2.36003	0.212336	0.285957	0.777746		-0.516093	-0.972123	-0.107074	-0.0482125	1.47386	0.779417	-1.84681	-0.0105804	0.719211	0.287522	-0.2997	0.471215	0.975471	1.10531	-0.0143165	-0.0623456	0.273817	-0.0569151	-0.0170559	0.2246	0.0512085	0.533608	0.758135	-0.701092	-0.15069	-0.42623
2.55903		-0.844378	0.207922	-0.417909	-0.977812	-0.354962	-0.62369	-0.0228857	0.0830175	0.177479	-0.764646	0.0898682	-0.11229	-0.340326	-0.436304	0.568379	0.21231	-0.945579	2.3659	0.292568	0.243836	0.753461		-0.386785	-0.878164	-0.0321318	-0.0759335	1.41862	0.823122	-1.8157	-0.0280925	0.645852	0.15474	-0.443317	0.406994	1.00154	1.12668	-0.0644798	0.166872	0.12883	0.128618	-0.13965	0.256302	0.0618199	0.540992	0.642431	-0.674964	-0.04407	-0.44693
2.60921		-0.864163	0.186016	-0.476084	-0.982744	-0.404285	-0.609722	-0.0319687	0.0502892	0.181126	-0.76914	0.0330323	0.0135547	-0.297145	-0.592196	0.712787	0.29623	-0.94162	2.29637	0.335226	0.239756	0.830148		-0.359126	-0.684343	-0.0472557	-0.0840525	1.4397	0.899359	-1.79738	-0.00378297	0.594407	0.0376278	-0.485653	0.321109	1.09277	1.19121	-0.0794109	0.489789	-0.0402253	0.23051	-0.235599	0.204513	0.0511869	0.473634	0.469753	-0.503035	-0.06633	-0.44934
2.65939		-0.814715	0.0576789	-0.457997	-0.965466	-0.452555	-0.524229	-0.0428929	0.0742814	0.173973	-0.79617	-0.0634223	0.0492476	-0.250688	-0.651373	0.709139	0.313124	-0.953893	2.10341	0.322304	0.240059	0.933205		-0.364341	-0.588638	-0.2733	-0.095097	1.47965	0.922443	-1.82804	0.0628732	0.611028	-0.0647205	-0.461626	0.210753	1.2009	1.25057	-0.0465042	0.756322	-0.127548	0.268662	-0.262873	0.0575442	0.0121012	0.461603	0.382304	-0.481969	-0.16994	-0.4753
2.70956		-0.733053	-0.0866678	-0.39906	-1.04058	-0.399145	-0.398324	-0.0522072	0.133211	0.160682	-0.878359	-0.15649	-0.0387246	-0.23988	-0.578042	0.562092	0.334576	-1.01484	1.83194	0.276516	0.231421	0.958953		-0.298375	-0.665028	-0.505152	-0.0992213	1.54308	0.886517	-1.86419	0.119792	0.639609	-0.144969	-0.436538	0.10515	1.28429	1.27363	-0.012155	0.926898	-0.121204	0.308532	-0.245795	-0.0624217	-0.0219504	0.577753	0.383792	-0.712393	-0.21993	-0.49683
2.75974		-0.719556	-0.130806	-0.352941	-1.17237	-0.247039	-0.334366	-0.0590238	0.166482	0.167192	-0.977028	-0.170961	-0.133669	-0.19928	-0.420605	0.495541	0.436603	-1.07463	1.56145	0.238671	0.242423	0.905421		-0.217561	-0.764087	-0.459242	-0.0976442	1.63494	0.868473	-1.85365	0.136477	0.632014	-0.188574	-0.420677	0.0722714	1.3501	1.25227	-0.0069458	1.10366	-0.0818288	0.341212	-0.264912	-0.0371227	-0.0407627	0.763736	0.390248	-0.869009	-0.17229	-0.47115
2.80992		-0.819805	-0.103025	-0.334354	-1.18852	-0.138848	-0.379569	-0.0626342	0.152682	0.188681	-1.02035	-0.138737	-0.191857	-0.0647834	-0.274709	0.649951	0.584432	-1.0851	1.32976	0.231484	0.302554	0.853243		-0.251481	-0.738964	-0.209336	-0.145273	1.68873	0.904889	-1.81111	0.146866	0.635118	-0.210211	-0.38721	0.120651	1.42757	1.18043	-0.00943212	1.33243	-0.0437055	0.375788	-0.348767	0.075144	-0.0617934	0.893461	0.336144	-0.671998	-0.10549	-0.43837
2.8601		-0.953731	-0.116103	-0.330889	-1.03091	-0.183795	-0.431634	-0.0689827	0.117564	0.19217	-1.00152	-0.17442	-0.263866	0.102385	-0.229383	0.869727	0.652807	-1.06191	1.14356	0.23887	0.41083	0.83744		-0.392024	-0.634143	-0.0968154	-0.281994	1.65196	0.940602	-1.77201	0.192388	0.684838	-0.248084	-0.346789	0.159334	1.50924	1.08068	0.00726152	1.51794	0.0182997	0.492532	-0.41622	0.11707	-0.0749777	0.900651	0.228791	-0.355299	-0.07619	-0.46958
2.91027		-0.99883	-0.191761	-0.31918	-0.854337	-0.320039	-0.368907	-0.0867407	0.0882669	0.179135	-0.971947	-0.298402	-0.311598	0.181643	-0.296528	0.905793	0.573595	-1.0336	1.02668	0.233494	0.547334	0.814427		-0.508387	-0.561554	-0.23043	-0.438841	1.58738	0.918635	-1.73163	0.26704	0.702256	-0.29862	-0.350826	0.126829	1.54674	1.01773	0.0367574	1.57903	0.121863	0.684994	-0.38977	0.0640934	-0.0412436	0.845314	0.148769	-0.331492	-0.05057	-0.54232
2.96045		-0.924563	-0.249604	-0.276811	-0.810311	-0.40794	-0.24555	-0.110102	0.0752985	0.194048	-0.954302	-0.395431	-0.22778	0.149697	-0.395478	0.730534	0.419381	-0.996831	1.00334	0.221009	0.689245	0.761491		-0.549858	-0.513977	-0.371608	-0.487505	1.60037	0.852037	-1.68915	0.339022	0.609599	-0.305566	-0.405782	0.105811	1.51566	1.02933	0.0633416	1.57056	0.206629	0.798469	-0.333025	0.0527465	0.0363505	0.83866	0.168676	-0.556415	-0.00794	-0.56687
3.01063		-0.810689	-0.245245	-0.216036	-0.85638	-0.404715	-0.232248	-0.120491	0.0841905	0.253089	-0.936578	-0.39121	-0.0400153	0.097271	-0.435619	0.522581	0.308418	-0.961588	1.04067	0.224466	0.812622	0.730559		-0.606608	-0.421297	-0.34802	-0.398848	1.69748	0.781556	-1.68901	0.38087	0.480081	-0.244159	-0.429608	0.223485	1.4534	1.07382	0.0879456	1.56703	0.175273	0.755451	-0.377869	0.155439	0.0901172	0.906538	0.241455	-0.616695	-0.00996	-0.52656
3.0608		-0.753064	-0.222971	-0.183741	-0.865663	-0.378189	-0.354761	-0.113253	0.111914	0.31338	-0.932878	-0.365107	0.108328	0.110529	-0.410532	0.407527	0.263258	-0.976365	1.06069	0.218081	0.894119	0.765637		-0.745626	-0.298132	-0.281517	-0.288167	1.79435	0.725244	-1.74991	0.367454	0.437114	-0.165357	-0.344995	0.470368	1.40324	1.09453	0.108893	1.51973	0.0196422	0.704694	-0.521325	0.251658	0.0705968	0.967468	0.234477	-0.376197	-0.10116	-0.49377
3.11098		-0.78663	-0.230223	-0.193691	-0.823556	-0.379595	-0.435639	-0.103799	0.137956	0.337019	-0.964246	-0.412426	0.183295	0.20377	-0.393689	0.36364	0.211468	-1.05746	1.02384	0.126103	0.911724	0.826799		-0.888455	-0.208059	-0.312919	-0.268012	1.84518	0.693446	-1.81164	0.298754	0.453884	-0.127256	-0.199469	0.705399	1.34761	1.09627	0.105826	1.35755	-0.140133	0.799957	-0.614023	0.198198	0.0158132	0.948284	0.114684	-0.139087	-0.21271	-0.50595
3.16116		-0.881584	-0.25565	-0.193404	-0.815725	-0.37973	-0.356258	-0.0981768	0.14087	0.34138	-0.993414	-0.484151	0.275123	0.348292	-0.444033	0.360451	0.101351	-1.14675	0.961107	-0.0730304	0.84842	0.852217		-0.915901	-0.145916	-0.37103	-0.307681	1.88892	0.692254	-1.82289	0.231052	0.404595	-0.135035	-0.129439	0.826256	1.24376	1.10629	0.0696607	1.17188	-0.185506	0.950109	-0.579989	0.0387051	-0.00463639	0.862738	0.0135349	-0.153824	-0.24468	-0.52056
3.21134		-0.976962	-0.268758	-0.139973	-0.882657	-0.34285	-0.233655	-0.0837177	0.120058	0.358229	-0.970828	-0.465315	0.390034	0.488305	-0.522021	0.430785	-0.044913	-1.19265	0.906949	-0.278105	0.713846	0.85834		-0.835548	-0.0698932	-0.353814	-0.290478	1.96437	0.692514	-1.8228	0.222533	0.286279	-0.170941	-0.199344	0.850593	1.11081	1.10615	0.0301422	1.13384	-0.140517	0.958528	-0.520737	-0.0608715	0.01084	0.756694	0.0435955	-0.315383	-0.20583	-0.5043
3.26151		-1.02804	-0.271652	-0.0709453	-0.9702	-0.304321	-0.229116	-0.0650167	0.0908712	0.381665	-0.930162	-0.346549	0.424652	0.540824	-0.502499	0.566654	-0.189086	-1.22307	0.841817	-0.358613	0.552021	0.914766		-0.764924	0.00635053	-0.320627	-0.178351	2.04848	0.657388	-1.86234	0.244681	0.221556	-0.226411	-0.339597	0.830999	1.02036	1.06765	0.0249315	1.22433	-0.132187	0.827853	-0.533212	-0.0408381	0.00879618	0.640233	0.140087	-0.436437	-0.19889	-0.48159
3.31169		-1.04641	-0.289871	-0.0496213	-0.998484	-0.322985	-0.310349	-0.0771078	0.0667648	0.388317	-0.936374	-0.205266	0.368323	0.473651	-0.295076	0.667928	-0.31998	-1.27724	0.73124	-0.30341	0.397714	1.03475		-0.763085	0.0599198	-0.347134	-0.0534599	2.10414	0.612434	-1.90551	0.220772	0.239081	-0.290657	-0.458238	0.778409	0.993408	1.01865	0.0490729	1.218	-0.224439	0.7403	-0.545423	0.00223623	-0.0092658	0.513851	0.179317	-0.506374	-0.28254	-0.4794
3.36187		-1.08013	-0.333159	-0.0737219	-0.94227	-0.374628	-0.351247	-0.133446	0.0521744	0.380884	-0.961179	-0.0703367	0.345576	0.389021	0.0266033	0.663094	-0.412685	-1.3093	0.588073	-0.218028	0.245477	1.15145		-0.759837	0.139978	-0.355892	0.00109038	2.13616	0.617655	-1.89013	0.152808	0.223572	-0.365315	-0.547031	0.698368	0.967454	1.00398	0.0620604	1.00189	-0.349508	0.766555	-0.444395	-0.0136424	0.0476364	0.410772	0.178719	-0.569309	-0.40863	-0.49501
3.41204		-1.14303	-0.377607	-0.0919927	-0.863393	-0.359637	-0.359739	-0.188853	0.0427863	0.380537	-0.933148	0.067077	0.414959	0.429316	0.249547	0.602313	-0.400983	-1.23564	0.455273	-0.176525	0.105697	1.20078		-0.677352	0.288379	-0.252006	-0.0021178	2.16386	0.661183	-1.83345	0.118724	0.120211	-0.479442	-0.648315	0.633841	0.890578	1.00538	0.0439403	0.765042	-0.411039	0.779586	-0.279775	-0.0548513	0.256023	0.368727	0.244486	-0.589732	-0.49656	-0.52614
3.46222		-1.19334	-0.385437	-0.0799238	-0.858403	-0.241438	-0.428709	-0.19155	0.02964	0.393624	-0.888827	0.144527	0.491131	0.576246	0.230719	0.570147	-0.248636	-1.0585	0.345101	-0.145461	0.0565283	1.16988		-0.55759	0.420146	-0.112086	-0.00457841	2.18082	0.664735	-1.79291	0.133322	0.0313279	-0.61112	-0.772624	0.622733	0.793973	0.967443	0.0178678	0.750326	-0.394647	0.682376	-0.208449	-0.0758189	0.581641	0.391585	0.348104	-0.559966	-0.52633	-0.56804
3.5124		-1.19148	-0.347255	-0.0414227	-0.941734	-0.118103	-0.534855	-0.150401	0.0106804	0.410203	-0.926392	0.072697	0.526294	0.64633	0.0660359	0.567887	-0.0321222	-0.87118	0.235407	-0.0809753	0.162523	1.06052		-0.510431	0.403145	-0.0848633	0.00316804	2.18115	0.61023	-1.76713	0.120525	0.0499422	-0.62258	-0.882936	0.646675	0.733988	0.889506	0.0117185	0.915076	-0.338841	0.553989	-0.280323	-0.110491	0.917839	0.462019	0.317705	-0.561139	-0.54391	-0.58292
3.56258		-1.13666	-0.300545	0.0339433	-1.01967	-0.106467	-0.572845	-0.11131	-0.00505336	0.423981	-1.02291	-0.10907	0.617827	0.52629	-0.0196485	0.539087	0.104316	-0.742975	0.120012	-0.0306439	0.361201	0.874036		-0.563878	0.248017	-0.169427	-0.0106509	2.18096	0.569638	-1.72042	0.0580455	0.12816	-0.393204	-0.930341	0.661843	0.709617	0.827842	0.0237827	0.996475	-0.247429	0.492514	-0.399567	-0.183936	1.17957	0.552433	0.107721	-0.61773	-0.58858	-0.54019
3.61275		-1.03681	-0.291522	0.147896	-1.03154	-0.20036	-0.545696	-0.088324	-0.0119536	0.436898	-1.06029	-0.245339	0.838875	0.313911	0.047731	0.458359	0.090262	-0.660945	0.0273561	-0.0672528	0.519701	0.655471		-0.63289	0.112216	-0.226187	-0.0479157	2.16525	0.585568	-1.66837	0.0390602	0.177914	-0.0129077	-0.895185	0.662575	0.685242	0.807998	0.0389251	0.878389	-0.103506	0.448094	-0.475202	-0.21889	1.32392	0.610729	-0.0659939	-0.627882	-0.62863	-0.48401
3.66293		-0.899694	-0.324862	0.248347	-1.04866	-0.301323	-0.544987	-0.0656855	-0.0160512	0.451911	-1.0221	-0.255542	1.07056	0.173915	0.108456	0.340721	-0.00994454	-0.590615	-0.017565	-0.155278	0.595246	0.482527		-0.641394	0.0998906	-0.182932	-0.0848786	2.06869	0.620028	-1.65422	0.129977	0.194169	0.28017	-0.817116	0.682718	0.655992	0.79572	0.0546078	0.708982	0.0388491	0.331274	-0.49958	-0.133991	1.33023	0.588298	0.00466487	-0.515436	-0.59153	-0.4914
3.71311		-0.774462	-0.370765	0.276042	-1.14896	-0.345228	-0.572118	-0.0513663	-0.0195925	0.470069	-0.987599	-0.215131	1.12744	0.150759	0.000436668	0.216538	-0.0911774	-0.534545	-0.0293444	-0.173384	0.645478	0.369183		-0.612197	0.148476	-0.118527	-0.132483	1.88448	0.657288	-1.66545	0.263974	0.209052	0.363308	-0.77276	0.742583	0.634759	0.76764	0.0729759	0.616447	0.05372	0.194065	-0.488579	0.0101273	1.22817	0.497319	0.200101	-0.351501	-0.4704	-0.56304
3.76328		-0.739248	-0.408861	0.242992	-1.27054	-0.327572	-0.547193	-0.0709356	-0.013212	0.48736	-0.944756	-0.218625	1.00911	0.188111	-0.21555	0.155823	-0.122252	-0.509767	-0.0500949	-0.0777283	0.688553	0.244376		-0.60427	0.148795	-0.133555	-0.216977	1.73823	0.753337	-1.65321	0.350784	0.209397	0.317016	-0.796013	0.819449	0.605004	0.754171	0.087248	0.510369	-0.125338	0.154674	-0.452364	0.0674561	1.11428	0.390312	0.204318	-0.270098	-0.35898	-0.62241
3.81346		-0.809624	-0.434001	0.201398	-1.3051	-0.248187	-0.474706	-0.110257	0.00426289	0.494087	-0.814845	-0.245425	0.912349	0.241625	-0.345598	0.256704	-0.139249	-0.513743	-0.102742	0.0369429	0.668908	0.0771818		-0.615918	0.0953915	-0.224617	-0.308196	1.74634	0.920138	-1.61807	0.411482	0.169606	0.252165	-0.843466	0.8699	0.547436	0.780901	0.0964555	0.301874	-0.402874	0.190376	-0.433008	-0.00251066	1.06114	0.285343	-0.0540346	-0.327177	-0.33238	-0.6259
3.86364		-0.904205	-0.430366	0.156146	-1.26775	-0.129101	-0.439894	-0.120766	0.0152415	0.488822	-0.661277	-0.211901	0.980833	0.288468	-0.321337	0.524966	-0.165489	-0.540669	-0.157591	0.0651322	0.577298	-0.0452588		-0.611562	0.0476255	-0.321825	-0.352359	1.83489	1.04744	-1.60265	0.519344	0.110994	0.185167	-0.864792	0.867184	0.489884	0.811718	0.118346	0.14117	-0.589594	0.16695	-0.475425	-0.0907307	1.02204	0.181216	-0.286628	-0.467636	-0.3342	-0.60683
3.91382		-0.936775	-0.384707	0.0846285	-1.24251	-0.0666206	-0.453558	-0.0911939	0.00602432	0.487716	-0.645973	-0.112355	1.13365	0.291865	-0.252493	0.805183	-0.192619	-0.597594	-0.156617	0.00750424	0.487328	-0.0375223		-0.612408	-0.0041439	-0.391033	-0.367362	1.82616	1.02195	-1.60772	0.665555	0.0740778	0.109916	-0.870014	0.816933	0.466031	0.795746	0.167814	0.205242	-0.581128	0.0638143	-0.542268	-0.0923771	0.899581	0.138883	-0.236527	-0.588446	-0.26337	-0.60072
3.96399		-0.911398	-0.326334	0.0251799	-1.22191	-0.153914	-0.45405	-0.0652495	-0.0164833	0.502367	-0.750533	-0.0494851	1.19141	0.24441	-0.227247	0.918581	-0.22548	-0.675165	-0.0841945	-0.073566	0.43386	0.042548		-0.677403	-0.13323	-0.446518	-0.40518	1.69464	0.874131	-1.58646	0.770086	0.0669052	0.0629945	-0.894351	0.745104	0.445219	0.743173	0.234141	0.364493	-0.457965	0.00141541	-0.540758	-0.0217402	0.6977	0.240633	-0.0158271	-0.629359	-0.14578	-0.59403
4.01417		-0.901329	-0.307838	0.0520227	-1.14623	-0.335366	-0.453569	-0.0743794	-0.0409301	0.515559	-0.767817	-0.112401	1.10912	0.213225	-0.192912	0.842565	-0.286539	-0.729559	0.00161023	-0.142516	0.357683	0.0575		-0.792888	-0.342618	-0.494158	-0.434716	1.59606	0.735873	-1.52652	0.795827	0.0740632	0.0595729	-0.937184	0.672643	0.377402	0.702843	0.296219	0.34555	-0.389782	0.0220473	-0.456004	0.0545064	0.520405	0.438565	0.0723272	-0.619484	-0.10762	-0.5711
4.06435		-0.956586	-0.335397	0.159691	-1.0517	-0.437735	-0.524025	-0.0975037	-0.0642488	0.503008	-0.623784	-0.255469	1.00475	0.272964	-0.095711	0.680415	-0.366524	-0.728289	0.0337614	-0.184831	0.217747	-0.0387338		-0.864409	-0.531722	-0.519442	-0.392319	1.62439	0.684883	-1.47592	0.784322	0.0851247	0.0512872	-0.974179	0.60177	0.295742	0.678719	0.350056	0.17222	-0.433413	0.0181115	-0.378485	0.120115	0.42263	0.555135	-0.06084	-0.618155	-0.17165	-0.55449
4.11452		-1.04664	-0.361033	0.263514	-1.0268	-0.383097	-0.633997	-0.104513	-0.0783671	0.47586	-0.495069	-0.346063	0.981004	0.405863	-0.020588	0.505887	-0.416418	-0.699192	0.0152546	-0.173341	0.0663295	-0.169354		-0.844035	-0.6219	-0.524883	-0.339424	1.68471	0.692881	-1.46935	0.795141	0.0883754	-0.0050165	-0.995716	0.526939	0.289993	0.62576	0.407514	0.126847	-0.454841	-0.0573694	-0.370855	0.182916	0.362235	0.504639	-0.221717	-0.622751	-0.2036	-0.56497
4.1647		-1.08236	-0.355302	0.328036	-1.05712	-0.283223	-0.66482	-0.0981213	-0.068514	0.474355	-0.529639	-0.335121	1.00858	0.508307	-0.0672877	0.341448	-0.407002	-0.700342	-0.00495193	-0.100419	-0.0405644	-0.244949		-0.794618	-0.631443	-0.532086	-0.406318	1.65652	0.706337	-1.47362	0.856726	0.0640832	-0.0967369	-0.997182	0.452712	0.370111	0.531797	0.477434	0.27229	-0.289176	-0.0750081	-0.384983	0.203298	0.316169	0.420311	-0.251214	-0.595496	-0.10814	-0.5836
4.21488		-1.00355	-0.340517	0.405094	-1.0591	-0.272215	-0.616663	-0.0913841	-0.0394096	0.516347	-0.633055	-0.309774	1.00441	0.492094	-0.15942	0.238343	-0.365109	-0.747527	-0.0184413	-0.0106758	-0.126302	-0.236153		-0.794459	-0.590536	-0.544669	-0.563144	1.55643	0.714813	-1.43118	0.96235	0.00996635	-0.195544	-0.958102	0.396024	0.438174	0.450089	0.559331	0.365433	0.0466519	0.0670983	-0.348594	0.140943	0.331486	0.463224	-0.259069	-0.564363	0.034268	-0.58647
4.26506		-0.859951	-0.336467	0.519966	-1.03472	-0.332151	-0.632385	-0.0812526	-0.0211004	0.575682	-0.627508	-0.338357	0.952713	0.371645	-0.138295	0.237946	-0.335798	-0.803045	-0.0636141	0.0418764	-0.226895	-0.164529		-0.841095	-0.474829	-0.548001	-0.627114	1.47484	0.733235	-1.33302	1.08021	-0.0435295	-0.28995	-0.863888	0.376606	0.420747	0.434245	0.645802	0.321636	0.368818	0.251876	-0.260469	0.0502501	0.406815	0.585004	-0.452175	-0.59713	0.100572	-0.58153
4.31523		-0.775706	-0.325461	0.605705	-1.05247	-0.361918	-0.7602	-0.0686922	-0.0325086	0.616027	-0.491881	-0.349097	0.903623	0.266749	-0.0303958	0.270805	-0.337503	-0.833951	-0.148394	0.0460275	-0.3076	-0.0878475		-0.882141	-0.292864	-0.550069	-0.542935	1.45425	0.764038	-1.2293	1.17762	-0.0646097	-0.365272	-0.734258	0.405563	0.358586	0.481977	0.720097	0.395581	0.55098	0.289465	-0.156132	0.0296932	0.42623	0.620032	-0.788868	-0.673672	0.098092	-0.57975
4.36541		-0.805049	-0.294959	0.592406	-1.11197	-0.345864	-0.85406	-0.0713777	-0.0565285	0.624975	-0.356231	-0.249013	0.892799	0.306117	-0.0483238	0.230704	-0.370345	-0.845034	-0.230281	0.0201276	-0.312771	-0.0745987		-0.883253	-0.160944	-0.586864	-0.47167	1.4868	0.802581	-1.17927	1.25268	-0.0550966	-0.40302	-0.608566	0.469653	0.330168	0.55838	0.760669	0.722278	0.639558	0.177526	-0.0538764	0.0749668	0.304536	0.56809	-0.946901	-0.699369	0.106513	-0.56528
4.41559		-0.866402	-0.265989	0.501451	-1.16405	-0.349146	-0.797759	-0.0899893	-0.064781	0.608663	-0.339957	-0.0932329	0.907447	0.494288	-0.285809	0.140241	-0.436611	-0.84538	-0.286317	-0.0209916	-0.258763	-0.138711		-0.838914	-0.192293	-0.676574	-0.525008	1.54074	0.855838	-1.19994	1.32777	-0.0351817	-0.406657	-0.508901	0.524733	0.345107	0.636849	0.76159	1.00603	0.703768	0.080856	0.012611	0.0828201	0.131496	0.604967	-0.706569	-0.663578	0.124083	-0.53271
4.46576		-0.863587	-0.255469	0.415733	-1.21979	-0.385985	-0.681387	-0.0932295	-0.0510303	0.573934	-0.452523	-0.0199527	0.912957	0.691445	-0.569267	0.10333	-0.522489	-0.821245	-0.342202	-0.063633	-0.219247	-0.216644		-0.770695	-0.346742	-0.791499	-0.591722	1.54809	0.92462	-1.25456	1.40652	-0.00626442	-0.391899	-0.427495	0.523477	0.356186	0.700898	0.744142	0.932039	0.678103	0.0861976	-0.01733	0.0132229	0.062908	0.790664	-0.272674	-0.670231	0.09277	-0.52253
4.51594		-0.817912	-0.257183	0.395426	-1.30426	-0.400968	-0.642745	-0.0647916	-0.0276221	0.529714	-0.599884	-0.0571384	0.877111	0.764794	-0.691871	0.105058	-0.579326	-0.770041	-0.410914	-0.0893474	-0.235879	-0.243593		-0.728885	-0.47388	-0.881688	-0.54325	1.46144	0.976356	-1.28763	1.46417	0.0428215	-0.365057	-0.347552	0.458452	0.33392	0.740011	0.737125	0.649573	0.4718	0.106206	-0.14189	-0.060955	0.103839	0.952559	-0.0741456	-0.78411	0.033235	-0.57
4.56612		-0.806785	-0.276743	0.437019	-1.35898	-0.367275	-0.662282	-0.0356533	-0.003419	0.493982	-0.662926	-0.109478	0.781616	0.727592	-0.664237	0.0270977	-0.562701	-0.733851	-0.460448	-0.093465	-0.280097	-0.22187		-0.736593	-0.484043	-0.91248	-0.457055	1.35154	0.971741	-1.27619	1.4883	0.0986072	-0.34101	-0.27036	0.368522	0.283336	0.760878	0.748493	0.539522	0.180945	0.0338852	-0.252548	-0.095258	0.119606	0.94674	-0.253828	-0.94496	0.025331	-0.63598
4.61629		-0.814746	-0.331869	0.483706	-1.33162	-0.307017	-0.646874	-0.0385431	0.020227	0.484978	-0.60918	-0.11029	0.649369	0.672592	-0.628651	-0.123921	-0.492718	-0.759488	-0.470011	-0.0889447	-0.295313	-0.188577		-0.732792	-0.408083	-0.886241	-0.485061	1.33929	0.924518	-1.23954	1.49485	0.127812	-0.348561	-0.214216	0.304693	0.212433	0.777713	0.765391	0.642874	0.0407591	-0.119842	-0.244647	-0.151343	0.0551121	0.879464	-0.504904	-1.04945	0.061785	-0.6408
4.66647		-0.742898	-0.402119	0.482725	-1.29973	-0.22367	-0.609376	-0.0583854	0.0390728	0.506941	-0.521389	-0.0738279	0.553744	0.619611	-0.630902	-0.18673	-0.444974	-0.834129	-0.465707	-0.080215	-0.262681	-0.1633		-0.645706	-0.315503	-0.846028	-0.603717	1.40863	0.899119	-1.18763	1.48637	0.123542	-0.38523	-0.182716	0.300328	0.126647	0.785251	0.776042	0.643089	0.14811	-0.274743	-0.131845	-0.274779	0.00720241	0.940531	-0.475602	-1.04079	0.041772	-0.56382
4.71665		-0.557609	-0.436446	0.459089	-1.35959	-0.111197	-0.621138	-0.0628896	0.0439673	0.550542	-0.477759	-0.0184113	0.547244	0.531736	-0.611575	-0.0938131	-0.468946	-0.898098	-0.471507	-0.0565831	-0.229992	-0.15745		-0.519115	-0.251862	-0.843849	-0.656681	1.41977	0.932788	-1.07613	1.42965	0.109353	-0.410939	-0.149857	0.362747	0.0459706	0.770044	0.777863	0.383362	0.347175	-0.369458	-0.00469186	-0.387982	0.041555	1.13309	-0.210964	-0.938383	-0.07212	-0.45787
4.76683		-0.340995	-0.425444	0.495679	-1.45643	-0.0262115	-0.667637	-0.0559294	0.0321915	0.602288	-0.44396	0.0505107	0.569548	0.451453	-0.56509	0.0269761	-0.535073	-0.922217	-0.472641	-0.0233088	-0.263474	-0.180914		-0.472643	-0.244878	-0.878707	-0.602258	1.34316	0.992186	-0.846155	1.31016	0.089039	-0.414325	-0.0953562	0.473378	-0.00446047	0.750155	0.769144	0.0970767	0.422499	-0.362899	0.077469	-0.384916	0.0736746	1.31014	-0.0548427	-0.850701	-0.19537	-0.35677
4.817		-0.183141	-0.405174	0.603566	-1.4741	-0.0456521	-0.690699	-0.0600822	0.020222	0.646096	-0.348523	0.0951168	0.494907	0.482376	-0.564647	0.0723083	-0.575596	-0.936056	-0.4532	-0.0143594	-0.357358	-0.207237		-0.526847	-0.295997	-0.88288	-0.568794	1.32313	1.02665	-0.513256	1.18612	0.0377799	-0.427616	-0.0410079	0.602266	-0.0229289	0.767032	0.750362	0.0494376	0.307598	-0.256066	0.111265	-0.28371	0.0137114	1.3933	-0.162679	-0.893924	-0.252	-0.22586
4.86718		-0.0992812	-0.380076	0.67768	-1.42769	-0.134748	-0.708827	-0.0677744	0.0385766	0.662216	-0.218809	0.0838969	0.311942	0.615403	-0.632576	0.109567	-0.562487	-0.971486	-0.421702	-0.0563911	-0.426177	-0.189816		-0.567523	-0.361092	-0.80696	-0.650515	1.43916	1.03244	-0.187626	1.13927	-0.0354617	-0.45324	-0.02139	0.731749	-0.0326756	0.828255	0.732162	0.18423	0.074012	-0.158732	0.115414	-0.214427	-0.0875754	1.40932	-0.289698	-1.0162	-0.27326	-0.03884
4.91736		-0.0718452	-0.316663	0.646701	-1.41279	-0.155217	-0.766415	-0.0551058	0.0993603	0.640828	-0.150599	0.0555766	0.178693	0.702541	-0.700914	0.197543	-0.532305	-1.01708	-0.375087	-0.137328	-0.421246	-0.142048		-0.511222	-0.397479	-0.702054	-0.763398	1.56095	1.03918	0.0131827	1.17023	-0.062638	-0.451192	-0.0232065	0.848098	-0.0524828	0.891574	0.72538	0.262717	-0.179447	-0.197797	0.117334	-0.265279	-0.142402	1.36442	-0.127075	-1.00782	-0.32121	0.140439
4.96753		-0.101494	-0.230245	0.593812	-1.41757	-0.0401253	-0.822265	-0.0306931	0.167872	0.600225	-0.172431	0.0532444	0.219749	0.655748	-0.719951	0.226638	-0.543939	-1.04909	-0.286113	-0.224618	-0.410329	-0.134972		-0.409144	-0.428964	-0.664802	-0.765408	1.547	1.05969	0.0633478	1.19195	0.00726832	-0.424533	0.00791709	0.909469	-0.0765331	0.920075	0.725215	0.195169	-0.3644	-0.296086	0.138051	-0.382584	-0.171568	1.22379	0.289138	-0.790497	-0.38727	0.20974
5.01771		-0.176384	-0.192196	0.635606	-1.345	0.120606	-0.809936	-0.0243462	0.187449	0.575862	-0.235959	0.0352512	0.343276	0.559299	-0.713644	0.0902248	-0.618761	-1.07019	-0.149988	-0.294289	-0.483807	-0.183447		-0.341449	-0.506894	-0.707228	-0.660666	1.4525	1.08127	0.0340309	1.1486	0.134118	-0.428123	0.087654	0.870336	-0.0869755	0.924903	0.720054	0.0810825	-0.404098	-0.224971	0.159445	-0.433124	-0.225118	1.00555	0.64049	-0.569252	-0.4227	0.149833
5.06789		-0.24443	-0.21321	0.746585	-1.19641	0.209093	-0.754508	-0.0334977	0.143754	0.580939	-0.31852	-0.0456284	0.377552	0.513127	-0.700334	-0.102687	-0.714229	-1.08186	0.00307161	-0.328521	-0.62025	-0.211731		-0.299395	-0.610662	-0.747545	-0.595253	1.41306	1.0899	0.0102441	1.09444	0.227276	-0.459117	0.155408	0.758579	-0.0805284	0.936202	0.709016	0.0186831	-0.279106	0.0214715	0.142338	-0.353248	-0.254679	0.801914	0.733612	-0.565776	-0.42187	0.045174
5.11807		-0.265989	-0.196045	0.815684	-1.09108	0.222475	-0.718024	-0.027186	0.0853563	0.590487	-0.42986	-0.125894	0.328082	0.468657	-0.640901	-0.150584	-0.75565	-1.04821	0.159135	-0.31727	-0.717251	-0.177742		-0.242309	-0.653639	-0.739846	-0.645367	1.43088	1.07837	0.0127186	1.1107	0.247877	-0.435436	0.147117	0.671914	-0.0755547	0.957391	0.693903	0.0171476	-0.0713928	0.136686	0.0953653	-0.216187	-0.205686	0.702852	0.690124	-0.725833	-0.41745	-0.01431
5.16824		-0.259008	-0.0586228	0.827496	-1.10005	0.23928	-0.687228	-0.00427079	0.0652022	0.578786	-0.52321	-0.116165	0.342322	0.329267	-0.509075	-0.0214244	-0.699136	-0.939017	0.333058	-0.289344	-0.732733	-0.154653		-0.20126	-0.59456	-0.73567	-0.703366	1.41369	1.0393	0.00208654	1.18213	0.238899	-0.329302	0.0833265	0.660193	-0.0898691	0.972119	0.665543	0.0320072	0.0714361	-0.042243	0.0764119	-0.136888	-0.152185	0.722934	0.718783	-0.833897	-0.41622	-0.00286
5.21842		-0.239736	0.147427	0.867193	-1.16566	0.302084	-0.624892	-0.00200059	0.0798146	0.559689	-0.513442	-0.0559182	0.447273	0.14621	-0.356263	0.159691	-0.554516	-0.79824	0.513783	-0.303562	-0.72305	-0.224947		-0.236672	-0.477203	-0.782596	-0.641898	1.34634	0.972631	-0.0482058	1.22599	0.256162	-0.230198	0.0419861	0.667037	-0.114897	0.977184	0.621817	-0.0259391	0.0463949	-0.237095	0.0992709	-0.135433	-0.187261	0.77385	0.832848	-0.808095	-0.39206	0.07287
5.2686		-0.145576	0.2901	0.975614	-1.19991	0.39272	-0.569373	-0.0366002	0.088039	0.567312	-0.412778	-0.0522857	0.501703	0.0793547	-0.263275	0.324433	-0.347685	-0.714921	0.654746	-0.365827	-0.748009	-0.353804		-0.331069	-0.350719	-0.838507	-0.514975	1.29058	0.904395	-0.104315	1.23339	0.29621	-0.219048	0.0486025	0.632065	-0.119135	0.978887	0.589261	-0.238183	-0.110239	-0.139451	0.093744	-0.139386	-0.253734	0.728981	0.872774	-0.741046	-0.34073	0.210418
5.31877		0.11734	0.295839	1.11704	-1.18856	0.488872	-0.564314	-0.0764568	0.0761618	0.605478	-0.354296	-0.103987	0.426618	0.170705	-0.257852	0.50217	-0.0962162	-0.71653	0.744044	-0.39527	-0.797531	-0.441429		-0.412808	-0.224681	-0.84343	-0.477551	1.26946	0.878736	-0.11654	1.30056	0.305426	-0.257574	0.0429786	0.587521	-0.0803495	0.96835	0.598352	-0.529657	-0.257629	0.102228	0.00202581	-0.103934	-0.242779	0.591355	0.748907	-0.739929	-0.29666	0.380389
5.36895		0.548538	0.20101	1.27951	-1.17559	0.586383	-0.547283	-0.0917646	0.0738027	0.644709	-0.428289	-0.120837	0.313611	0.281362	-0.301402	0.678108	0.160059	-0.736859	0.833321	-0.333511	-0.811824	-0.463861		-0.467334	-0.11989	-0.811546	-0.550362	1.26764	0.906455	-0.095853	1.49143	0.250339	-0.259039	-0.02755	0.593979	-0.0118108	0.933813	0.639854	-0.680827	-0.306648	0.120347	-0.128498	-0.060845	-0.189244	0.546647	0.569892	-0.850615	-0.27968	0.511046
5.41913		1.02191	0.0918858	1.50294	-1.18854	0.67405	-0.440508	-0.0959981	0.102398	0.666842	-0.563437	-0.0823452	0.258587	0.290082	-0.328891	0.771001	0.34762	-0.70646	0.966703	-0.247984	-0.735186	-0.484718		-0.535291	-0.079023	-0.78596	-0.612898	1.29994	0.929337	-0.107212	1.73578	0.160172	-0.205186	-0.125091	0.639803	0.0455538	0.892657	0.670062	-0.607329	-0.300847	-0.106184	-0.201696	-0.0463496	-0.19938	0.714098	0.508368	-1.05404	-0.26273	0.557444
5.46931		1.37927	0.0223128	1.8026	-1.20661	0.729253	-0.313095	-0.115467	0.13579	0.680759	-0.633708	-0.0386115	0.240225	0.249963	-0.287954	0.763115	0.417589	-0.633138	1.11702	-0.246223	-0.562593	-0.536706		-0.609103	-0.0901832	-0.760499	-0.614556	1.37907	0.8797	-0.185159	1.91679	0.0926568	-0.141612	-0.166501	0.672433	0.0581847	0.876336	0.65937	-0.493855	-0.302811	-0.262052	-0.194791	-0.0549488	-0.251576	0.909435	0.585841	-1.22083	-0.22362	0.552718
5.51948		1.524	-0.0201431	2.1325	-1.19142	0.74358	-0.311181	-0.144928	0.131558	0.692678	-0.628148	0.0137448	0.225111	0.276435	-0.16499	0.730655	0.391508	-0.566996	1.21517	-0.319194	-0.366118	-0.566469		-0.632565	-0.0787375	-0.718503	-0.624637	1.45912	0.781454	-0.295828	2.01825	0.0731501	-0.107456	-0.127317	0.678717	0.0297006	0.88435	0.616719	-0.505106	-0.284886	-0.188785	-0.173095	-0.0781617	-0.248711	0.865262	0.657509	-1.15683	-0.19636	0.540235
5.56966		1.4549	-0.0790329	2.4117	-1.12986	0.730481	-0.436335	-0.160081	0.0878849	0.696942	-0.624997	0.113863	0.255063	0.361866	0.00872412	0.733763	0.32421	-0.523282	1.21569	-0.367571	-0.25036	-0.524287		-0.612172	-0.0182193	-0.693267	-0.658134	1.49976	0.729124	-0.391013	2.12213	0.0846638	-0.110199	-0.0645043	0.671284	-0.00506703	0.888895	0.569061	-0.523263	-0.226147	-0.0464763	-0.199819	-0.116835	-0.207913	0.650594	0.625553	-0.831177	-0.22606	0.495552
5.61984		1.27073	-0.162865	2.547	-1.03774	0.708882	-0.533544	-0.157471	0.0436756	0.703515	-0.627991	0.222593	0.348025	0.411307	0.178858	0.771109	0.251726	-0.480211	1.12373	-0.364365	-0.244621	-0.45301		-0.617906	0.0275543	-0.709909	-0.627643	1.54115	0.747117	-0.458448	2.27632	0.104851	-0.128648	-0.0454105	0.64844	-0.0189542	0.88313	0.536017	-0.368507	-0.218112	0.00491763	-0.27814	-0.143382	-0.208156	0.605231	0.582982	-0.49995	-0.29723	0.385616
5.67001		1.11794	-0.233846	2.49695	-0.936457	0.698016	-0.518989	-0.157395	0.0242924	0.735544	-0.549208	0.272258	0.426862	0.420362	0.29657	0.833267	0.195383	-0.433997	0.988734	-0.37883	-0.269515	-0.430373		-0.645789	0.0198188	-0.717375	-0.512411	1.63406	0.755755	-0.505211	2.43022	0.123534	-0.11575	-0.0826511	0.627212	-0.0188306	0.882503	0.52136	-0.129953	-0.321141	0.00893194	-0.368006	-0.12835	-0.201766	0.840177	0.657001	-0.451739	-0.35795	0.26655
5.72019		1.06137	-0.272906	2.38261	-0.847628	0.718476	-0.482921	-0.173716	0.0172697	0.785939	-0.373945	0.312263	0.444216	0.478153	0.337517	0.903188	0.174057	-0.414578	0.881078	-0.437252	-0.249924	-0.446317		-0.603783	0.0195191	-0.66628	-0.412735	1.73996	0.715991	-0.535046	2.5145	0.126498	-0.0403486	-0.135567	0.655359	-0.0225316	0.879755	0.509215	-0.0365689	-0.396037	0.0550566	-0.414167	-0.110342	-0.0809441	1.10114	0.778394	-0.651462	-0.39216	0.224346
5.77037		1.01994	-0.317791	2.4422	-0.794846	0.761683	-0.512636	-0.196659	0.0105209	0.815336	-0.224944	0.459172	0.491797	0.575588	0.319019	0.919314	0.180383	-0.446622	0.843167	-0.474822	-0.219216	-0.408304		-0.488898	0.0810952	-0.61586	-0.382107	1.77584	0.701211	-0.564558	2.53313	0.0976723	0.0621894	-0.154595	0.72843	-0.0202601	0.852718	0.470474	-0.10361	-0.270563	0.128744	-0.372278	-0.149917	0.0998286	1.21143	0.766873	-0.790075	-0.41427	0.235865
5.82055		0.89149	-0.40326	2.76013	-0.774898	0.758439	-0.543549	-0.201942	0.0204343	0.809214	-0.209038	0.704338	0.675379	0.554193	0.291773	0.840957	0.178074	-0.520645	0.847678	-0.446049	-0.25398	-0.276199		-0.445442	0.140232	-0.673014	-0.353201	1.72439	0.76174	-0.622487	2.54211	0.0508212	0.129612	-0.125338	0.763084	0.014951	0.8269	0.391439	-0.153932	-0.0226235	0.188771	-0.257147	-0.209511	0.170067	1.3332	0.628992	-0.696765	-0.42168	0.200724
5.87072		0.705705	-0.499038	3.11832	-0.741013	0.63392	-0.486808	-0.170765	0.0577887	0.795025	-0.294831	0.902948	0.936081	0.331358	0.277751	0.74002	0.149702	-0.60372	0.824803	-0.376963	-0.344146	-0.121382		-0.55264	0.0886916	-0.842551	-0.278363	1.64186	0.834739	-0.702067	2.56462	0.029917	0.162785	-0.0828236	0.722427	0.080512	0.874253	0.293069	-0.132835	0.112939	0.255019	-0.154404	-0.189073	0.101858	1.60602	0.563784	-0.529715	-0.4143	0.110671
5.9209		0.571349	-0.553036	3.24721	-0.657036	0.426934	-0.406018	-0.110023	0.0951247	0.784041	-0.39441	0.956908	1.11755	0.0687636	0.229612	0.729978	0.117337	-0.66243	0.739843	-0.281001	-0.404679	-0.0204172		-0.67491	-0.0702332	-1.01115	-0.197014	1.5855	0.8695	-0.740089	2.56836	0.0568786	0.21017	-0.0769292	0.693163	0.141184	1.02571	0.20465	-0.168212	0.089075	0.350368	-0.137644	-0.100013	0.036056	1.81689	0.624739	-0.495389	-0.42759	0.059948
5.97108		0.508364	-0.567212	3.15098	-0.551422	0.300329	-0.432089	-0.0572084	0.103999	0.747379	-0.474357	0.894446	1.19059	-0.00657358	0.111953	0.811391	0.0957551	-0.679044	0.62361	-0.126968	-0.397354	0.0476509		-0.651998	-0.209198	-1.07427	-0.115606	1.56559	0.916061	-0.674169	2.52637	0.102312	0.264327	-0.110035	0.751045	0.179638	1.22667	0.126515	-0.319886	0.063607	0.4383	-0.184845	-0.0809089	0.0516168	1.72197	0.615101	-0.556686	-0.47788	0.066911
6.02125		0.436959	-0.579113	3.03386	-0.473037	0.367932	-0.55352	-0.0498224	0.104938	0.682282	-0.536735	0.777993	1.27554	0.115284	0.00810031	0.877765	0.0590913	-0.661148	0.520872	0.070323	-0.361008	0.149512		-0.545992	-0.222684	-1.03212	0.035173	1.53995	0.995281	-0.512772	2.4672	0.132628	0.264213	-0.11875	0.820126	0.215301	1.39897	0.0418025	-0.458908	0.0734658	0.47266	-0.21756	-0.192345	0.0824126	1.49378	0.44629	-0.559382	-0.51239	0.027891
6.07143		0.316526	-0.590919	2.97883	-0.422963	0.540694	-0.631318	-0.0787678	0.139655	0.650074	-0.58121	0.654558	1.4126	0.252633	0.044334	0.86402	-0.0201784	-0.634954	0.437909	0.220239	-0.322761	0.291183		-0.548104	-0.150141	-0.968964	0.268036	1.45532	1.01896	-0.333604	2.44216	0.160511	0.21934	-0.0395758	0.774912	0.262031	1.51247	-0.0421181	-0.449523	-0.0411078	0.469365	-0.198716	-0.311074	0.0706054	1.48728	0.351922	-0.516217	-0.48816	-0.09893
6.12161		0.187286	-0.571156	2.89232	-0.383763	0.616838	-0.607386	-0.0865737	0.203045	0.698448	-0.628494	0.592619	1.44941	0.292621	0.191896	0.801524	-0.125913	-0.622304	0.358011	0.264819	-0.258687	0.419967		-0.691058	-0.128639	-0.962994	0.487911	1.3352	0.948581	-0.216033	2.4539	0.21043	0.231208	0.113623	0.633829	0.307106	1.58419	-0.0931752	-0.345556	-0.311222	0.491519	-0.142613	-0.302639	0.042074	1.65624	0.521271	-0.575616	-0.45685	-0.20562
6.17179		0.0733199	-0.513548	2.73217	-0.372235	0.514265	-0.567098	-0.0307912	0.244315	0.78481	-0.695368	0.635894	1.25397	0.275461	0.271282	0.73836	-0.220544	-0.630951	0.281388	0.246433	-0.161999	0.505765		-0.811288	-0.2224	-1.00455	0.623272	1.29068	0.887962	-0.174651	2.44731	0.255833	0.343191	0.268818	0.531767	0.349302	1.64319	-0.0980933	-0.325606	-0.485057	0.567453	-0.0587535	-0.208564	0.0118242	1.59563	0.732063	-0.757175	-0.48445	-0.21031
6.22196		-0.0497034	-0.445072	2.58061	-0.392495	0.344272	-0.588833	0.0573695	0.237686	0.829709	-0.729215	0.697023	0.939086	0.235606	0.208807	0.693306	-0.296112	-0.668211	0.218465	0.231178	-0.0817614	0.569082		-0.791982	-0.344059	-1.00413	0.706442	1.37009	0.895637	-0.15341	2.38412	0.245176	0.456894	0.393504	0.52231	0.411279	1.70733	-0.0831231	-0.441731	-0.349168	0.636912	0.0460357	-0.171591	-0.0464095	1.18502	0.652935	-0.895392	-0.53117	-0.1913
6.27214		-0.169883	-0.384059	2.47287	-0.387009	0.254357	-0.650009	0.0998732	0.21334	0.816693	-0.670521	0.619288	0.736782	0.131849	0.146515	0.679485	-0.371766	-0.740689	0.156177	0.231193	-0.0539944	0.637371		-0.701086	-0.389797	-0.90804	0.79059	1.45111	0.858444	-0.0939839	2.30298	0.183593	0.461277	0.530105	0.526796	0.487079	1.76661	-0.0835697	-0.51704	-0.0376376	0.603696	0.127413	-0.235321	-0.116503	0.809193	0.367668	-0.864258	-0.51352	-0.2493
6.32232		-0.219452	-0.33297	2.33817	-0.323222	0.262892	-0.698912	0.0610704	0.204316	0.786558	-0.583932	0.391661	0.693448	-0.023983	0.195615	0.688022	-0.441591	-0.825636	0.0647402	0.233374	-0.0392465	0.707604		-0.654753	-0.391234	-0.783978	0.87644	1.39174	0.693318	-0.0149562	2.27937	0.130002	0.372734	0.71594	0.483671	0.527578	1.78748	-0.105188	-0.392817	0.140024	0.45845	0.142081	-0.316363	-0.139947	0.812882	0.244211	-0.733026	-0.45074	-0.35071
6.37249		-0.181709	-0.305282	2.15633	-0.278344	0.268494	-0.717496	-0.0102672	0.195258	0.76101	-0.599664	0.197818	0.635422	-0.123754	0.230969	0.655836	-0.457437	-0.8695	-0.0577338	0.236033	0.0233405	0.748595		-0.664602	-0.428958	-0.739291	0.941863	1.23781	0.52521	-0.00105177	2.33967	0.111576	0.277929	0.920075	0.433943	0.517424	1.75609	-0.122344	-0.219308	0.0788931	0.312594	0.128272	-0.348845	-0.107573	1.05749	0.346964	-0.651876	-0.43515	-0.41196
6.42267		-0.140323	-0.321056	2.01792	-0.331127	0.184658	-0.701123	-0.0400068	0.153079	0.731048	-0.715757	0.18178	0.440433	-0.125081	0.0946277	0.532484	-0.386697	-0.848982	-0.170196	0.221822	0.121636	0.725737		-0.686957	-0.453926	-0.778673	0.969226	1.15019	0.504524	-0.101303	2.44567	0.1052	0.203322	1.10335	0.425879	0.517135	1.70403	-0.11082	-0.293581	-0.0573203	0.271306	0.170255	-0.360289	-0.0551307	1.20612	0.359762	-0.657868	-0.4744	-0.43885
6.47285		-0.166546	-0.376358	1.97171	-0.412939	0.0453891	-0.668145	-0.0125901	0.0921905	0.702665	-0.798175	0.250298	0.202473	-0.128251	-0.11991	0.373331	-0.269392	-0.819647	-0.229435	0.161051	0.182047	0.63522		-0.732019	-0.363485	-0.81309	0.94234	1.17341	0.576052	-0.265063	2.55333	0.113101	0.127166	1.28979	0.432916	0.579035	1.66286	-0.0763943	-0.595574	-0.0965145	0.313975	0.258648	-0.398167	0.0176825	1.19455	0.121705	-0.665351	-0.47882	-0.47485
6.52303		-0.216167	-0.44288	1.93883	-0.389848	-0.0245297	-0.686251	0.0238004	0.0707506	0.693981	-0.794116	0.205688	0.0754682	-0.197421	-0.196179	0.286913	-0.182972	-0.86067	-0.237074	0.08207	0.180446	0.520146		-0.829108	-0.229042	-0.793007	0.880537	1.22287	0.589032	-0.39697	2.64733	0.183262	0.0740545	1.50527	0.422724	0.667985	1.61667	-0.0410691	-0.76177	-0.0563791	0.353587	0.263876	-0.463396	0.121326	1.18688	-0.126147	-0.635617	-0.40117	-0.49699
6.5732		-0.207962	-0.497768	1.84039	-0.265879	0.0388147	-0.794357	0.0240401	0.115045	0.694035	-0.796493	0.0238295	0.0676358	-0.222846	-0.132155	0.292522	-0.156411	-0.971449	-0.236088	0.0719985	0.194343	0.432696		-0.934668	-0.235353	-0.755647	0.855089	1.25904	0.527585	-0.449298	2.72081	0.322515	0.0960447	1.6798	0.436105	0.724181	1.53702	-0.00259039	-0.616729	-0.0891175	0.3637	0.106027	-0.540848	0.193501	1.22233	-0.144878	-0.668287	-0.27464	-0.4694
6.62338		-0.163996	-0.539945	1.71624	-0.169691	0.131885	-0.912712	-0.00999412	0.179067	0.676351	-0.864408	-0.120123	0.0776517	-0.090199	-0.127984	0.305032	-0.162821	-1.07239	-0.257332	0.157438	0.310392	0.376751		-0.978722	-0.372173	-0.745685	0.905922	1.31126	0.478237	-0.443712	2.76594	0.451182	0.168757	1.70439	0.528667	0.759537	1.43942	0.0646007	-0.421416	-0.304896	0.367172	-0.107717	-0.622192	0.158912	1.14792	-0.0487593	-0.844487	-0.11095	-0.43181
6.67356		-0.181547	-0.580053	1.66115	-0.148421	0.0912062	-0.931531	-0.051632	0.197974	0.647922	-0.930933	-0.10201	0.0572817	0.0999868	-0.26678	0.263307	-0.196466	-1.12078	-0.274366	0.247664	0.509043	0.314491		-0.9843	-0.416144	-0.757788	0.977423	1.35277	0.45789	-0.429171	2.79455	0.48962	0.196056	1.5793	0.675501	0.819881	1.36072	0.153366	-0.412747	-0.654992	0.343808	-0.201927	-0.659936	0.0610677	0.871914	-0.0913969	-1.02923	0.112764	-0.43853
6.72373		-0.271683	-0.618868	1.70661	-0.121955	-0.090409	-0.866297	-0.0864383	0.158751	0.636197	-0.944685	-0.00224918	0.0336794	0.138841	-0.41705	0.207411	-0.290824	-1.16623	-0.227036	0.258433	0.691132	0.232318		-1.03613	-0.283158	-0.757161	1.00405	1.32089	0.420423	-0.437307	2.83163	0.452392	0.133708	1.41758	0.794787	0.888693	1.304	0.204807	-0.416857	-0.953449	0.261315	-0.161129	-0.571992	0.0213066	0.525798	-0.312197	-0.980606	0.344136	-0.46539
6.77391		-0.32461	-0.633687	1.80132	-0.0580675	-0.244736	-0.817507	-0.114451	0.0977753	0.632296	-0.962511	0.0436052	0.015508	-0.0011537	-0.453983	0.219019	-0.43312	-1.25718	-0.099007	0.233812	0.805821	0.16382		-1.12825	-0.167967	-0.707261	1.0066	1.25871	0.375734	-0.464353	2.881	0.419286	0.0396674	1.29822	0.837458	0.911783	1.25304	0.17842	-0.206148	-1.02296	0.189426	-0.139033	-0.35706	0.0683542	0.3373	-0.549714	-0.684097	0.465276	-0.46221
6.82409		-0.268766	-0.598959	1.86431	-0.0330142	-0.253152	-0.810021	-0.135239	0.0519646	0.598323	-1.0246	0.0456843	-0.00791935	-0.133068	-0.393123	0.329801	-0.530933	-1.35653	0.047449	0.2696	0.886772	0.133949		-1.15435	-0.229814	-0.593074	1.01882	1.27665	0.380578	-0.490791	2.9321	0.438581	-0.0189957	1.20439	0.800648	0.895088	1.22098	0.110198	0.0302599	-0.850682	0.254093	-0.237591	-0.149011	0.115003	0.392851	-0.66946	-0.421707	0.463737	-0.44901
6.87427		-0.174866	-0.533934	1.8437	-0.061315	-0.190777	-0.798539	-0.14714	0.0386882	0.534549	-1.05651	0.109011	0.00970236	-0.108644	-0.292555	0.490221	-0.520787	-1.40943	0.137899	0.366433	0.95896	0.116464		-1.07985	-0.355037	-0.463044	0.978652	1.36226	0.445815	-0.521173	2.99763	0.488623	-0.0455621	1.11477	0.686898	0.891472	1.2348	0.0614235	-0.0523727	-0.607276	0.430607	-0.382848	-0.076962	0.106636	0.558849	-0.655514	-0.430725	0.471937	-0.47802
6.92444		-0.141833	-0.50532	1.75877	-0.0221649	-0.190965	-0.801959	-0.152868	0.0637064	0.491691	-0.986564	0.23462	0.132714	0.0299588	-0.188638	0.601174	-0.4593	-1.43622	0.171465	0.448064	0.993537	0.0764244		-1.01398	-0.368237	-0.418113	0.811562	1.37995	0.542652	-0.577898	3.09392	0.518647	-0.066243	1.05704	0.519281	0.900726	1.2823	0.0392446	-0.38097	-0.509073	0.499807	-0.455197	-0.108762	0.0858281	0.648664	-0.554173	-0.636011	0.567557	-0.53405
6.97462		-0.159086	-0.549734	1.68004	0.145131	-0.262305	-0.885634	-0.155912	0.117353	0.50207	-0.872972	0.292912	0.326113	0.163517	-0.146011	0.591141	-0.44409	-1.48	0.204222	0.485811	0.984217	0.0368766		-1.0535	-0.294249	-0.503639	0.592424	1.28152	0.67454	-0.641526	3.18412	0.504548	-0.0588609	1.04164	0.373864	0.870579	1.31781	0.0116364	-0.544506	-0.650712	0.315661	-0.44672	-0.114277	0.0895501	0.627088	-0.41114	-0.815697	0.64908	-0.55099
7.0248		-0.165089	-0.615116	1.64135	0.302182	-0.321633	-1.01256	-0.156749	0.171755	0.535019	-0.828084	0.201911	0.492106	0.236998	-0.220258	0.484536	-0.48596	-1.51391	0.255552	0.502818	0.979428	0.0669831		-1.1464	-0.257275	-0.636558	0.495745	1.17475	0.868109	-0.648119	3.20537	0.466938	0.0141665	1.02984	0.315879	0.798814	1.31565	-0.0265102	-0.396804	-0.937624	0.0359288	-0.429061	-0.0499766	0.0806406	0.572357	-0.252599	-0.884805	0.597323	-0.51609
7.07497		-0.17373	-0.62243	1.59932	0.28908	-0.335312	-1.05259	-0.156254	0.204048	0.540042	-0.878569	0.0323874	0.632897	0.261993	-0.347882	0.369334	-0.526346	-1.49245	0.28157	0.478628	0.988841	0.194009		-1.17883	-0.267962	-0.692418	0.570147	1.15133	1.09789	-0.586499	3.16327	0.439637	0.124682	0.999026	0.309031	0.74759	1.28791	-0.0496991	-0.212746	-1.16559	-0.0619249	-0.435494	0.0161594	0.0238464	0.475812	-0.12023	-0.89186	0.459088	-0.49059
7.12515		-0.234925	-0.564722	1.51093	0.142082	-0.33524	-0.962157	-0.156764	0.21425	0.509819	-0.964429	-0.101124	0.852624	0.283948	-0.402901	0.285581	-0.545052	-1.44992	0.253434	0.361266	0.948998	0.353801		-1.12461	-0.265616	-0.645419	0.666642	1.1774	1.27321	-0.545963	3.12867	0.422822	0.187807	0.958715	0.269639	0.741043	1.25821	-0.0459705	-0.214237	-1.20619	0.0431344	-0.441922	0.0422673	-0.0427879	0.246864	-0.10174	-0.877287	0.368093	-0.51737
7.17533		-0.317463	-0.489108	1.40557	0.0120887	-0.338647	-0.843216	-0.159427	0.208461	0.479249	-1.01831	-0.181361	1.17082	0.369933	-0.375233	0.192637	-0.573057	-1.4432	0.207826	0.175406	0.844545	0.462455		-1.04711	-0.261514	-0.577733	0.629203	1.19619	1.31664	-0.607722	3.12331	0.384258	0.15925	0.880111	0.20809	0.728175	1.24096	-0.0272185	-0.287084	-1.12851	0.112616	-0.427908	0.0588736	-0.0647241	-0.0617738	-0.241297	-0.884919	0.366083	-0.5609
7.22551		-0.353664	-0.397857	1.33389	-0.050741	-0.336516	-0.802495	-0.166241	0.182776	0.474365	-1.00194	-0.271339	1.45806	0.531841	-0.369574	0.0643391	-0.616916	-1.43488	0.18422	0.0197577	0.765407	0.526414		-1.0158	-0.297227	-0.569633	0.481706	1.22332	1.23391	-0.729541	3.08698	0.313998	0.0838912	0.710947	0.215953	0.671783	1.23361	-0.0115284	-0.282747	-1.08115	0.0401996	-0.409285	0.0667449	-0.0523981	-0.242405	-0.42074	-0.990784	0.408366	-0.56618
7.27568		-0.376876	-0.241716	1.2921	-0.107631	-0.337832	-0.84582	-0.180181	0.138889	0.482922	-0.930149	-0.404627	1.60517	0.648317	-0.426586	-0.0472445	-0.645504	-1.35023	0.156852	-0.05292	0.763299	0.624061		-1.0672	-0.336752	-0.6236	0.371585	1.28762	1.08976	-0.803295	2.98464	0.246582	0.0271455	0.49897	0.296586	0.603783	1.21308	-0.0186771	-0.292165	-1.06397	0.0155362	-0.422997	0.00675706	-0.0529606	-0.235374	-0.466643	-1.16722	0.477749	-0.53947
7.32586		-0.484742	-0.017584	1.25391	-0.193302	-0.356432	-0.924729	-0.196623	0.0963549	0.476929	-0.889439	-0.54555	1.65241	0.569662	-0.481375	-0.0832215	-0.64776	-1.2246	0.0807912	-0.0713952	0.753356	0.761833		-1.18293	-0.317085	-0.687316	0.369989	1.35881	0.934149	-0.797838	2.86308	0.205441	-0.0126954	0.389703	0.327315	0.562833	1.15892	-0.0583126	-0.414237	-0.953683	0.177816	-0.486322	-0.12237	-0.069403	-0.239378	-0.399519	-1.23762	0.579237	-0.5289
7.37604		-0.663343	0.194707	1.23421	-0.286634	-0.372101	-0.997801	-0.203699	0.0716863	0.450195	-0.953641	-0.638828	1.69472	0.320727	-0.506753	-0.0597605	-0.639136	-1.16891	-0.0268348	-0.0674173	0.659911	0.825841		-1.2729	-0.2505	-0.716362	0.395734	1.37823	0.791141	-0.779531	2.76367	0.160788	-0.0873898	0.434889	0.243471	0.538191	1.08977	-0.105542	-0.482391	-0.784093	0.3294	-0.557576	-0.221152	-0.064915	-0.394139	-0.409152	-1.11748	0.664741	-0.5469
7.42621		-0.776116	0.310878	1.25214	-0.376273	-0.364341	-1.02875	-0.200463	0.0593915	0.423405	-1.05803	-0.664561	1.74074	0.090098	-0.549583	-0.0328899	-0.612628	-1.19594	-0.115105	-0.0513569	0.564432	0.736578		-1.25215	-0.191743	-0.709022	0.347381	1.31955	0.707208	-0.807543	2.66156	0.0840101	-0.207537	0.505739	0.147322	0.508128	1.04548	-0.121196	-0.282013	-0.789473	0.222005	-0.569799	-0.23656	-0.0379738	-0.564076	-0.537767	-0.964283	0.669694	-0.56348
7.47639		-0.755571	0.309967	1.26043	-0.4601	-0.36449	-0.999736	-0.203057	0.0465957	0.415601	-1.05275	-0.656363	1.73018	-0.010393	-0.596294	-0.0232877	-0.547386	-1.20335	-0.188859	-0.0597442	0.585822	0.579712		-1.15815	-0.158781	-0.690361	0.254755	1.2133	0.731077	-0.871635	2.53965	0.0143045	-0.317257	0.480132	0.150423	0.482321	1.02302	-0.109273	0.0887665	-1.03789	-0.0215989	-0.534041	-0.263176	-0.0325602	-0.603063	-0.58842	-0.924482	0.607143	-0.56933
7.52657		-0.689954	0.223244	1.1883	-0.513445	-0.411593	-0.942457	-0.220942	0.0319884	0.421836	-0.908702	-0.678908	1.64538	-0.0608699	-0.550393	-0.0172865	-0.471183	-1.13654	-0.295939	-0.129256	0.685951	0.485623		-1.11495	-0.152688	-0.669692	0.24435	1.13928	0.819072	-0.936166	2.44734	0.0165136	-0.369237	0.417913	0.203594	0.472499	0.973003	-0.112118	0.328069	-1.2329	-0.0524516	-0.545292	-0.398179	-0.0635067	-0.614327	-0.438601	-0.898985	0.544342	-0.58743
7.57674		-0.675743	0.109118	1.04825	-0.520818	-0.474611	-0.903274	-0.240321	0.0195728	0.422755	-0.765114	-0.763268	1.54026	-0.166643	-0.397192	-0.00150935	-0.450033	-1.05395	-0.428999	-0.218233	0.723635	0.434494		-1.17011	-0.198531	-0.632842	0.376944	1.16002	0.847135	-0.996357	2.42761	0.0865929	-0.37661	0.44545	0.188187	0.463282	0.878494	-0.136755	0.337795	-1.0988	0.203503	-0.629674	-0.560415	-0.0920827	-0.719927	-0.237948	-0.769115	0.504691	-0.61267
7.62692		-0.69174	0.0346508	0.931698	-0.496516	-0.489093	-0.88885	-0.245902	0.00766815	0.408158	-0.733299	-0.855932	1.45519	-0.296647	-0.255181	0.0480209	-0.497361	-1.01351	-0.521799	-0.242674	0.658981	0.311316		-1.25513	-0.305258	-0.583527	0.591502	1.22648	0.770141	-1.07075	2.44032	0.152145	-0.367033	0.555726	0.1024	0.44448	0.788004	-0.139963	0.292344	-0.795644	0.475754	-0.673938	-0.5801	-0.102602	-0.774206	-0.149774	-0.675025	0.471732	-0.59965
7.6771		-0.684635	0.0212308	0.890773	-0.438052	-0.461655	-0.899264	-0.244653	-0.00658723	0.385487	-0.75681	-0.869776	1.34558	-0.364047	-0.189571	0.168438	-0.550659	-1.00226	-0.558826	-0.19202	0.582555	0.12768		-1.31202	-0.430719	-0.549969	0.807792	1.2133	0.685843	-1.16045	2.41143	0.162734	-0.335773	0.652001	0.0374146	0.436834	0.740314	-0.106185	0.322994	-0.684119	0.575291	-0.602279	-0.445942	-0.140274	-0.597366	-0.0790619	-0.792384	0.474269	-0.53817
7.72728		-0.686979	0.00854808	0.885431	-0.329102	-0.461142	-0.973232	-0.248981	-0.0230282	0.369844	-0.719541	-0.80149	1.14233	-0.368939	-0.0948906	0.343267	-0.565126	-1.00883	-0.605298	-0.12629	0.556761	0.0329987		-1.35566	-0.528456	-0.517098	0.997612	1.09765	0.679191	-1.23709	2.32292	0.135066	-0.285362	0.716513	0.0130607	0.454489	0.704762	-0.0801524	0.35195	-0.796325	0.601142	-0.53118	-0.330915	-0.225541	-0.346266	0.147572	-0.979612	0.565572	-0.48964
7.77745		-0.759005	-0.0703084	0.865974	-0.22048	-0.505534	-1.11881	-0.249497	-0.0430696	0.370513	-0.602531	-0.753555	0.880743	-0.360512	0.136654	0.468246	-0.578406	-1.0677	-0.691949	-0.0704537	0.534211	0.0845683		-1.39482	-0.584899	-0.409301	1.13915	1.0214	0.695916	-1.27123	2.21803	0.113372	-0.267077	0.783884	-0.0393331	0.471785	0.63541	-0.08975	0.273282	-0.840265	0.664271	-0.612314	-0.354354	-0.293312	-0.330568	0.458341	-0.968302	0.691446	-0.50595
7.82763		-0.868318	-0.18355	0.84687	-0.215298	-0.535649	-1.24292	-0.229624	-0.0664138	0.383259	-0.471622	-0.807262	0.698609	-0.31871	0.417303	0.459033	-0.643568	-1.18436	-0.747739	-0.00875273	0.450368	0.15772		-1.39488	-0.590912	-0.2092	1.20102	1.0989	0.650459	-1.26136	2.14294	0.1244	-0.324482	0.796671	-0.142204	0.459195	0.542019	-0.094841	0.123278	-0.679116	0.683584	-0.791323	-0.441567	-0.286322	-0.543634	0.613608	-0.806975	0.685375	-0.54718
7.87781		-0.922602	-0.235238	0.859244	-0.327165	-0.510244	-1.25352	-0.199401	-0.0833061	0.39281	-0.380102	-0.912239	0.664635	-0.180464	0.553028	0.377934	-0.739158	-1.28745	-0.703689	0.0276068	0.32484	0.141273		-1.35121	-0.541408	-0.0381609	1.20875	1.24118	0.570615	-1.22728	2.10582	0.162922	-0.418698	0.660621	-0.232559	0.429266	0.462218	-0.0577813	0.00265123	-0.504744	0.584377	-0.881237	-0.471839	-0.251708	-0.694316	0.552064	-0.775871	0.488388	-0.53014
7.92798		-0.903488	-0.203388	0.878901	-0.443811	-0.451989	-1.19799	-0.185149	-0.0851991	0.38976	-0.349435	-0.951244	0.678595	0.0315611	0.492964	0.372777	-0.79609	-1.30357	-0.603107	-0.0173471	0.234213	0.0884593		-1.31641	-0.484195	-0.0139962	1.23186	1.27136	0.541922	-1.18432	2.07751	0.187309	-0.467005	0.435749	-0.270562	0.416711	0.398281	-0.0148378	-0.0568124	-0.506365	0.473293	-0.837402	-0.459742	-0.256759	-0.664839	0.44975	-0.907863	0.307042	-0.4423
7.97816		-0.886427	-0.170865	0.858027	-0.481902	-0.388894	-1.18847	-0.186047	-0.0808191	0.388178	-0.398506	-0.893926	0.60952	0.192517	0.376503	0.489522	-0.794082	-1.2368	-0.543426	-0.105063	0.212857	0.0946305		-1.32044	-0.490759	-0.0649745	1.26543	1.15993	0.579475	-1.14205	2.0272	0.148999	-0.450104	0.304117	-0.291207	0.431817	0.330106	-0.0217413	-0.0845027	-0.617979	0.454606	-0.796622	-0.501655	-0.26306	-0.621994	0.433828	-0.941701	0.412243	-0.35698
8.02834		-0.925203	-0.203724	0.801761	-0.486666	-0.325943	-1.22039	-0.174351	-0.0834593	0.415123	-0.52354	-0.825392	0.469849	0.207902	0.328155	0.629842	-0.782318	-1.14656	-0.552802	-0.12141	0.216274	0.143953		-1.32265	-0.545856	-0.0125143	1.22382	1.03737	0.64061	-1.12221	1.96529	0.0642552	-0.43387	0.321353	-0.316519	0.462958	0.265822	-0.0626777	-0.103135	-0.672976	0.444612	-0.849985	-0.608329	-0.198778	-0.663501	0.433472	-0.769562	0.785475	-0.33385
8.07852		-0.986482	-0.268813	0.757627	-0.525263	-0.286148	-1.19174	-0.146396	-0.0865156	0.47418	-0.664128	-0.821986	0.370277	0.118987	0.308782	0.704586	-0.802212	-1.08389	-0.592044	-0.0448618	0.187725	0.178856		-1.26698	-0.547268	0.175859	1.09261	0.998257	0.704858	-1.14606	1.93411	0.0273201	-0.478479	0.346864	-0.29884	0.508385	0.232199	-0.0712791	-0.114162	-0.631103	0.338946	-0.931487	-0.692395	-0.114885	-0.656819	0.367988	-0.609417	1.11416	-0.35109
8.12869		-1.01681	-0.305895	0.74376	-0.575803	-0.300635	-1.08682	-0.135572	-0.0743405	0.533207	-0.740783	-0.87144	0.35795	0.0494351	0.218205	0.732385	-0.826251	-1.06683	-0.644609	0.00921379	0.134059	0.223843		-1.14149	-0.456041	0.358958	0.978463	0.996978	0.769437	-1.19335	1.94616	0.102688	-0.560145	0.260423	-0.204288	0.573262	0.228448	-0.0234884	-0.106208	-0.560488	0.23487	-0.955414	-0.704016	-0.127937	-0.508581	0.310185	-0.658757	1.17832	-0.35569
8.17887		-1.01589	-0.323117	0.739555	-0.591589	-0.33826	-1.0075	-0.15446	-0.0541182	0.564507	-0.732248	-0.941688	0.393112	0.0612506	0.0674385	0.755308	-0.794598	-1.08326	-0.726887	-0.0454793	0.104344	0.317077		-0.97125	-0.361711	0.457364	0.956294	0.949747	0.818048	-1.20474	1.96812	0.231608	-0.600031	0.114382	-0.0921819	0.645183	0.226045	0.0412	-0.0643166	-0.503956	0.305251	-0.928919	-0.68813	-0.219306	-0.348639	0.359547	-0.840035	1.08983	-0.3426
8.22905		-1.01281	-0.368636	0.737961	-0.596346	-0.318188	-1.00968	-0.162028	-0.0494666	0.584672	-0.690449	-1.04	0.447191	0.0973616	-0.0370406	0.759042	-0.700615	-1.10422	-0.82084	-0.152136	0.105667	0.385729		-0.790892	-0.346122	0.562574	0.969291	0.861779	0.848037	-1.15115	1.98684	0.300289	-0.559827	0.0165506	-0.0426452	0.702411	0.202827	0.0795101	-0.0142191	-0.449281	0.516875	-0.875082	-0.689709	-0.245515	-0.323873	0.482731	-0.978675	1.06852	-0.34707
8.27922		-1.01432	-0.441048	0.757546	-0.638896	-0.218738	-1.02454	-0.121192	-0.0624282	0.628967	-0.678566	-1.13474	0.53065	0.08437	-0.0506923	0.734664	-0.611311	-1.1179	-0.872231	-0.218702	0.0884785	0.325996		-0.635842	-0.370994	0.764122	0.935113	0.814298	0.878719	-1.08217	2.04239	0.278215	-0.49492	-0.0216573	-0.0387912	0.740963	0.153032	0.0818384	-0.0462171	-0.385298	0.637414	-0.741497	-0.67646	-0.169183	-0.378126	0.604112	-1.01993	1.13508	-0.37977
8.3294		-1.0111	-0.488287	0.808158	-0.708038	-0.112208	-0.971633	-0.0562508	-0.0712805	0.693602	-0.717114	-1.1063	0.636196	0.0524982	-0.0446497	0.731882	-0.585564	-1.14632	-0.865572	-0.256044	0.0258568	0.178891		-0.535729	-0.368383	1.01031	0.858573	0.856865	0.900296	-1.07215	2.1543	0.234513	-0.500804	-0.0517933	0.00343594	0.77108	0.0843033	0.060461	-0.228382	-0.324391	0.518476	-0.455472	-0.606021	-0.12279	-0.364243	0.749196	-0.983991	1.1597	-0.41431
8.37958		-1.00011	-0.492309	0.888037	-0.757234	-0.0667009	-0.864107	-0.0140328	-0.0685625	0.737128	-0.790537	-0.895628	0.722702	0.0900482	-0.0973457	0.785046	-0.596807	-1.20322	-0.840221	-0.334353	-0.0366504	0.0931474		-0.505442	-0.356829	1.21601	0.781993	0.944329	0.874273	-1.12248	2.25747	0.236229	-0.598866	-0.0907151	0.0971078	0.795913	0.0282087	0.0398518	-0.500081	-0.267612	0.261613	-0.0317316	-0.524689	-0.186169	-0.260988	0.950674	-0.884443	1.09601	-0.4349
8.42976		-0.966309	-0.502278	1.00565	-0.773961	-0.0691589	-0.766561	0.00164625	-0.0680692	0.743528	-0.873147	-0.649134	0.752593	0.196799	-0.204096	0.859674	-0.581088	-1.2569	-0.819061	-0.456352	-0.0322775	0.112906		-0.544641	-0.383719	1.38775	0.698378	0.982565	0.81197	-1.15417	2.26619	0.282811	-0.691341	-0.124422	0.157562	0.813397	0.0279767	0.0486816	-0.720947	-0.177976	0.0856592	0.419736	-0.524154	-0.249648	-0.151521	1.09751	-0.766012	1.00333	-0.45318
8.47993		-0.871222	-0.562213	1.1584	-0.775727	-0.0739031	-0.701817	0.0124169	-0.0681769	0.749339	-0.932499	-0.577897	0.708119	0.274079	-0.308917	0.924273	-0.547281	-1.27577	-0.778443	-0.55093	0.0554645	0.13026		-0.634347	-0.426718	1.5516	0.568473	0.929595	0.789437	-1.11133	2.18102	0.329963	-0.660337	-0.15301	0.137347	0.823436	0.090219	0.0877067	-0.824774	-0.022225	0.105018	0.781963	-0.600762	-0.19377	-0.0587589	1.05819	-0.677913	0.906955	-0.47438
8.53011		-0.694535	-0.64172	1.29722	-0.774057	-0.0743048	-0.634797	0.0122999	-0.0466916	0.793161	-0.939588	-0.69088	0.586849	0.271062	-0.361408	0.98844	-0.566705	-1.28817	-0.70785	-0.571197	0.18838	0.0717622		-0.730001	-0.442974	1.66059	0.383731	0.839047	0.850988	-1.03774	2.08449	0.336067	-0.509624	-0.180879	0.115051	0.811766	0.171581	0.122653	-0.859225	0.153602	0.274146	1.00832	-0.625831	-0.0827285	0.0597117	0.908752	-0.571345	0.793102	-0.49016
8.58029		-0.470003	-0.676084	1.36039	-0.780373	-0.0828328	-0.536932	-0.0141155	-0.00708792	0.866139	-0.90371	-0.798999	0.414701	0.241179	-0.32404	1.0205	-0.641622	-1.3436	-0.644454	-0.540468	0.313446	0.00430831		-0.779885	-0.452688	1.6804	0.184726	0.789137	0.945079	-1.01509	2.04035	0.29164	-0.367648	-0.199746	0.195264	0.750271	0.23022	0.141479	-0.880199	0.235563	0.492321	1.11975	-0.486388	-0.0575949	0.175697	0.849331	-0.373199	0.703545	-0.5131
8.63046		-0.257897	-0.659218	1.34354	-0.811764	-0.0794326	-0.444844	-0.0420682	0.0106008	0.930724	-0.87049	-0.777917	0.250637	0.22306	-0.192086	0.942381	-0.672295	-1.42776	-0.620813	-0.509488	0.391228	0.00381362		-0.765584	-0.486004	1.69064	0.0341381	0.782803	0.984678	-1.04679	2.03589	0.228869	-0.335777	-0.209701	0.366196	0.644181	0.260594	0.187201	-0.882463	0.17082	0.683688	1.1491	-0.219656	-0.124218	0.192109	0.907598	-0.172969	0.693735	-0.57175
8.68064		-0.0971518	-0.651342	1.2972	-0.860241	-0.037941	-0.42465	-0.031688	-0.009791	0.964384	-0.85811	-0.692557	0.148443	0.170468	-0.0412528	0.777573	-0.601627	-1.47265	-0.624862	-0.508993	0.404771	0.0376249		-0.71783	-0.511752	1.78757	-0.0407023	0.755586	0.943918	-1.05537	2.0218	0.1928	-0.378991	-0.224842	0.519834	0.553233	0.265207	0.287034	-0.83885	0.0501428	0.779981	1.1159	0.0105198	-0.17687	0.110678	0.911583	-0.15343	0.715954	-0.65496
8.73082		0.00354497	-0.691084	1.25478	-0.889885	0.0122066	-0.465619	0.00918837	-0.0266104	0.965385	-0.828178	-0.64568	0.114353	0.0542914	0.00566392	0.674015	-0.513641	-1.44822	-0.640453	-0.538261	0.358302	0.0574022		-0.691321	-0.509752	1.93395	-0.0929428	0.679708	0.880265	-0.99455	1.9748	0.195429	-0.401703	-0.246965	0.588319	0.52355	0.23515	0.385311	-0.736001	0.000991034	0.72107	1.0554	0.0477674	-0.175346	0.068291	0.767431	-0.307075	0.667762	-0.70329
8.781		0.045883	-0.747216	1.19791	-0.885599	0.0118575	-0.465119	0.0392727	-0.00160861	0.938508	-0.747728	-0.630975	0.118534	-0.0587242	-0.0895829	0.684777	-0.519647	-1.39272	-0.685039	-0.568442	0.267453	0.109207		-0.726327	-0.541337	2.01106	-0.200482	0.605391	0.873969	-0.906937	1.90526	0.220057	-0.388093	-0.265641	0.597857	0.5198	0.18035	0.413035	-0.563072	0.0209285	0.52749	1.02427	-0.130305	-0.17074	0.138168	0.585076	-0.409191	0.550583	-0.67505
8.83117		0.0276316	-0.777258	1.09581	-0.872566	-0.0385954	-0.373236	0.0522545	0.0358588	0.898261	-0.635924	-0.583346	0.143395	-0.0951637	-0.219889	0.670262	-0.60793	-1.34957	-0.774261	-0.56216	0.153433	0.250732		-0.816347	-0.642316	1.98807	-0.346723	0.580795	0.946067	-0.850997	1.81929	0.266243	-0.401953	-0.283559	0.599383	0.47783	0.137621	0.395996	-0.335214	-0.00651397	0.309669	1.04174	-0.366497	-0.189199	0.212383	0.489373	-0.317042	0.476104	-0.58303
8.88135		-0.0503875	-0.788278	0.952791	-0.878393	-0.0762132	-0.295936	0.07868	0.0286951	0.867552	-0.51856	-0.486612	0.193867	-0.0740882	-0.250945	0.544054	-0.683691	-1.32225	-0.881055	-0.514542	0.0457675	0.431354		-0.901412	-0.718929	1.93633	-0.425779	0.590048	1.03782	-0.825832	1.70356	0.346249	-0.460691	-0.311599	0.607403	0.411488	0.124973	0.415067	-0.142081	-0.132266	0.149636	1.05769	-0.426714	-0.208362	0.183525	0.453202	-0.128052	0.514786	-0.44855
8.93153		-0.157221	-0.804282	0.813211	-0.911157	-0.0723808	-0.366669	0.119468	-0.0235691	0.851307	-0.39725	-0.379616	0.251491	-0.0625462	-0.17906	0.455	-0.712764	-1.30003	-0.960282	-0.464885	-0.028446	0.55985		-0.920197	-0.673647	1.89111	-0.396765	0.605637	1.08962	-0.805344	1.56317	0.434731	-0.48224	-0.351282	0.61	0.404827	0.125218	0.474816	-0.0959092	-0.26564	0.0316133	1.01198	-0.229938	-0.23033	0.141503	0.372374	-0.0116296	0.624857	-0.26214
8.9817		-0.226311	-0.811216	0.729133	-0.966247	-0.0643072	-0.55284	0.129305	-0.0654612	0.828888	-0.30611	-0.297587	0.25843	-0.0899501	-0.131527	0.543644	-0.742091	-1.28528	-0.994706	-0.44165	-0.0710431	0.641081		-0.887625	-0.567588	1.80312	-0.349739	0.643725	1.12873	-0.801626	1.44924	0.478022	-0.385131	-0.408634	0.590183	0.495691	0.131778	0.497828	-0.19195	-0.3065	-0.063158	0.894878	0.0346706	-0.27668	0.251008	0.214334	-0.0463011	0.734236	-0.0207
9.03188		-0.215895	-0.779004	0.714116	-1.00432	-0.0689575	-0.688724	0.0846835	-0.0611662	0.793661	-0.323414	-0.235658	0.189221	-0.147323	-0.218049	0.66305	-0.800344	-1.2762	-1.00002	-0.41342	-0.114237	0.743142		-0.884741	-0.52208	1.64257	-0.372974	0.718988	1.23364	-0.844392	1.40553	0.469521	-0.201953	-0.495428	0.533071	0.630331	0.165536	0.450607	-0.288202	-0.273498	-0.078172	0.734665	0.108851	-0.328486	0.491191	0.0508625	-0.227327	0.81536	0.226022
9.08206		-0.169301	-0.711485	0.724214	-0.94345	-0.0460602	-0.68548	0.0321027	-0.0259128	0.778669	-0.459576	-0.160369	0.108454	-0.216167	-0.411953	0.573431	-0.858601	-1.25045	-1.00264	-0.338077	-0.181499	0.866166		-0.944461	-0.524157	1.46581	-0.436286	0.796854	1.41166	-0.923707	1.39475	0.461647	-0.0575018	-0.586721	0.449977	0.748696	0.223977	0.390642	-0.280915	-0.24846	0.0200898	0.581	-0.0346851	-0.35749	0.665433	-0.0251412	-0.454443	0.864129	0.401452
9.13224		-0.161986	-0.632268	0.700501	-0.751299	0.0119479	-0.616566	0.0381936	0.0155444	0.815569	-0.601765	-0.0634797	0.0960107	-0.264486	-0.582759	0.315173	-0.892597	-1.18636	-1.02008	-0.250156	-0.257993	0.94512		-0.992645	-0.484926	1.33605	-0.459519	0.844092	1.56788	-0.99813	1.33374	0.480506	-0.0364443	-0.624521	0.391842	0.849743	0.260986	0.37019	-0.233788	-0.259667	0.137877	0.51106	-0.201243	-0.388912	0.664472	-0.0155316	-0.516595	0.865985	0.467342
9.18241		-0.193292	-0.544138	0.630393	-0.529071	0.0371084	-0.595853	0.104857	0.0569783	0.885516	-0.652195	0.00149945	0.136346	-0.263334	-0.629046	0.142859	-0.922322	-1.09029	-1.04649	-0.233352	-0.310782	0.959387		-0.949809	-0.434664	1.22643	-0.425562	0.880314	1.61549	-1.04315	1.20999	0.483412	-0.087816	-0.605039	0.402104	0.93939	0.250945	0.364484	-0.242087	-0.281528	0.149742	0.567112	-0.254638	-0.451922	0.593668	-0.0356604	-0.291135	0.8133	0.448937
9.23259		-0.197336	-0.439788	0.547967	-0.408254	-0.00775324	-0.650057	0.165416	0.0884173	0.940229	-0.665136	-0.0201937	0.155357	-0.232609	-0.565055	0.149509	-0.971849	-0.991891	-1.05932	-0.286842	-0.324557	0.945953		-0.852562	-0.483026	1.05543	-0.374766	0.931532	1.57335	-1.06025	1.10034	0.431696	-0.0789275	-0.606031	0.463649	0.97657	0.236919	0.323001	-0.231371	-0.295593	0.0588045	0.66529	-0.234315	-0.50564	0.602011	-0.161446	0.0363634	0.729505	0.408315
9.28277		-0.155134	-0.324527	0.482032	-0.373794	-0.0613384	-0.723694	0.172513	0.0865503	0.959468	-0.752137	-0.0904829	0.145103	-0.22866	-0.479866	0.199092	-1.02692	-0.917807	-1.0545	-0.28614	-0.303598	0.921111		-0.812589	-0.614017	0.814635	-0.345096	0.982608	1.5296	-1.06357	1.05465	0.352491	0.0414026	-0.677233	0.527046	0.930744	0.279236	0.240763	-0.0489458	-0.294702	-0.0280184	0.666218	-0.192677	-0.498433	0.672776	-0.296212	0.15472	0.653873	0.404464
9.33294		-0.113705	-0.191543	0.429311	-0.300615	-0.07315	-0.754078	0.161281	0.0480608	0.960855	-0.892924	-0.111416	0.155448	-0.271174	-0.439182	0.197019	-1.05084	-0.878424	-1.05908	-0.124726	-0.254993	0.875619		-0.875892	-0.694782	0.615778	-0.351844	1.01863	1.5385	-1.08828	1.031	0.289957	0.158915	-0.767925	0.579143	0.853521	0.37947	0.153389	0.248576	-0.28197	-0.0554552	0.562878	-0.0999386	-0.460044	0.662466	-0.298923	0.0303212	0.608053	0.462797
9.38312		-0.0973806	-0.0143138	0.368339	-0.159578	-0.0978019	-0.725092	0.196601	0.00555013	0.965975	-0.95248	-0.0562626	0.171247	-0.318692	-0.450661	0.189055	-1.0243	-0.879337	-1.08848	0.155824	-0.192697	0.830462		-0.983237	-0.678517	0.567471	-0.374529	1.05683	1.58066	-1.17641	0.979257	0.246564	0.124659	-0.821747	0.64977	0.823697	0.486895	0.0942686	0.390517	-0.310123	-0.0596334	0.479634	0.0355337	-0.450792	0.530746	-0.201317	-0.0881703	0.584792	0.563085
9.4333		-0.0914936	0.189114	0.276946	-0.0567148	-0.187864	-0.676375	0.274362	-0.00903601	0.98366	-0.875321	0.0097025	0.113897	-0.32467	-0.499749	0.199504	-0.960738	-0.931457	-1.11677	0.429302	-0.144165	0.812918		-1.06113	-0.636595	0.618397	-0.351761	1.1004	1.61235	-1.31476	0.916961	0.217336	-0.0438132	-0.86718	0.765488	0.838382	0.563629	0.0710018	0.254289	-0.437527	-0.0606415	0.453582	0.117842	-0.461281	0.440464	-0.151248	-0.0651326	0.567436	0.660087
9.48348		-0.108996	0.327954	0.154717	-0.0543598	-0.262843	-0.666994	0.319509	0.00175158	1.0137	-0.744589	0.0451839	-0.0155761	-0.289002	-0.57133	0.191216	-0.896722	-1.03271	-1.12054	0.626345	-0.120116	0.791961		-1.09191	-0.594978	0.596253	-0.249451	1.12346	1.62435	-1.42289	0.87738	0.228442	-0.17729	-0.938682	0.930017	0.826838	0.611764	0.0629098	0.0669883	-0.589822	-0.00651649	0.367429	0.112874	-0.446845	0.555944	-0.179306	-0.0241664	0.55509	0.728422
9.53365		-0.169993	0.335258	0.048864	-0.0886091	-0.201769	-0.718427	0.286552	0.0175383	1.04171	-0.626014	0.0807863	-0.107541	-0.254183	-0.640645	0.191034	-0.871755	-1.14536	-1.12688	0.745402	-0.0867902	0.718682		-1.08905	-0.501408	0.433416	-0.134215	1.12686	1.63828	-1.44525	0.84865	0.283179	-0.187586	-0.991626	1.1331	0.765664	0.641119	0.0409266	0.115189	-0.582127	0.140152	0.163209	0.110368	-0.42063	0.793536	-0.185156	-0.0657559	0.560471	0.787576
9.58383		-0.219717	0.254344	0.026548	-0.0973591	-0.0385447	-0.797265	0.218192	0.0316297	1.04442	-0.47277	0.134625	-0.10054	-0.272689	-0.686596	0.253852	-0.90028	-1.21792	-1.17846	0.778505	-0.0108146	0.616162		-1.06084	-0.367811	0.27035	-0.109534	1.13271	1.66068	-1.41791	0.813766	0.318791	-0.179994	-0.995134	1.3471	0.706154	0.640923	0.0060278	0.37509	-0.381689	0.310798	-0.0401346	0.165307	-0.42709	0.903738	-0.125114	-0.112084	0.578941	0.879646
9.63401		-0.186418	0.169305	0.0961246	-0.104615	0.0475775	-0.857838	0.184191	0.049593	1.02103	-0.246309	0.16474	-0.0722521	-0.368386	-0.716115	0.299662	-0.952706	-1.23684	-1.26525	0.730069	0.071499	0.547918		-1.02365	-0.293429	0.258595	-0.185206	1.11116	1.67262	-1.40215	0.790111	0.287476	-0.272556	-1.02812	1.53726	0.678558	0.598391	-0.00476275	0.585496	-0.235189	0.373607	-0.143841	0.210268	-0.457495	0.805966	-0.0571474	-0.124752	0.572353	1.02963
9.68418		-0.126676	0.0974484	0.192873	-0.134764	-0.0441721	-0.887561	0.196015	0.0693475	0.99906	-0.0258848	0.131324	-0.117728	-0.505354	-0.74548	0.188684	-0.977931	-1.23598	-1.32871	0.684255	0.0841483	0.509711		-1.00971	-0.311477	0.339184	-0.283986	1.0134	1.6658	-1.40115	0.780785	0.239783	-0.405088	-1.15329	1.70992	0.645845	0.531792	0.0302764	0.615477	-0.386903	0.264582	-0.225186	0.1992	-0.472473	0.688121	-0.031495	-0.219997	0.503771	1.23052
9.73436		-0.180238	0.0201991	0.267804	-0.157992	-0.196948	-0.901916	0.208697	0.078391	0.991262	0.0952306	0.0468025	-0.211796	-0.598908	-0.768183	-0.0263907	-0.959659	-1.25137	-1.33302	0.736287	0.0188181	0.436644		-1.02846	-0.333947	0.338871	-0.360042	0.890707	1.65143	-1.39595	0.744113	0.250106	-0.436827	-1.25541	1.92249	0.578884	0.481671	0.0794087	0.602263	-0.747546	0.0618614	-0.359256	0.2016	-0.478635	0.718732	-0.0663963	-0.428123	0.387137	1.44828
9.78454		-0.351261	-0.0379247	0.339723	-0.170429	-0.20355	-0.907352	0.186274	0.0677494	0.978343	0.144627	-0.0456765	-0.263285	-0.575585	-0.770193	-0.12538	-0.938812	-1.28849	-1.30783	0.845132	-0.0501331	0.313086		-1.04534	-0.286923	0.236321	-0.421436	0.861007	1.62382	-1.41122	0.661151	0.29371	-0.370654	-1.15818	2.19628	0.506267	0.463001	0.0936496	0.738705	-1.00358	-0.0727996	-0.435198	0.258488	-0.507012	0.81134	-0.175943	-0.560049	0.277288	1.62466
9.83472		-0.469299	-0.0519037	0.421339	-0.229469	-0.00412147	-0.88884	0.139395	0.0426143	0.954916	0.200713	-0.100323	-0.262352	-0.43261	-0.755418	-0.0389073	-0.958785	-1.3354	-1.30999	0.859771	-0.0778793	0.193951		-1.0304	-0.206702	0.176878	-0.45336	0.933514	1.56179	-1.47411	0.58642	0.28477	-0.352015	-0.886392	2.43987	0.451874	0.445311	0.0612262	1.048	-1.00722	-0.0393424	-0.335152	0.264029	-0.542751	0.769044	-0.312396	-0.482345	0.201783	1.69733
9.88489		-0.425808	-0.0654871	0.452769	-0.355152	0.241357	-0.845632	0.106068	0.0201141	0.949373	0.249407	-0.0916755	-0.290411	-0.250552	-0.723275	0.0420588	-0.996865	-1.38177	-1.34507	0.722088	-0.106653	0.115827		-1.00711	-0.168648	0.226879	-0.425112	0.990009	1.48628	-1.54561	0.586325	0.214261	-0.459229	-0.669385	2.52427	0.389958	0.396698	0.00293939	1.39135	-0.894277	0.0977462	-0.183279	0.104965	-0.549891	0.544137	-0.370429	-0.346578	0.132892	1.65658
9.93507		-0.328686	-0.118857	0.376096	-0.478328	0.319202	-0.822863	0.112055	0.0146521	0.967688	0.216857	-0.0526776	-0.375129	-0.145221	-0.647414	-0.0628981	-0.981927	-1.42016	-1.33899	0.548758	-0.174982	0.0669927		-1.02065	-0.195063	0.276685	-0.368727	0.963105	1.46138	-1.56526	0.658642	0.15861	-0.609204	-0.668964	2.43626	0.310858	0.331688	-0.0634579	1.62158	-0.836946	0.168692	-0.19638	-0.162138	-0.542946	0.256142	-0.34905	-0.364939	0.048175	1.575
9.98525		-0.34189	-0.156984	0.240899	-0.544074	0.177334	-0.862056	0.149209	0.0226365	0.965174	0.0989042	-0.0585397	-0.413166	-0.17212	-0.514567	-0.29792	-0.885843	-1.44806	-1.21504	0.467536	-0.243077	0.0502532		-1.07587	-0.260781	0.229494	-0.346823	0.902674	1.4985	-1.53891	0.740852	0.158407	-0.69008	-0.821326	2.29327	0.26969	0.291923	-0.127197	1.69323	-0.841791	0.0846506	-0.346525	-0.375321	-0.560584	0.0391932	-0.387708	-0.498158	-0.01858	1.53519
10.0354		-0.473627	-0.116117	0.159517	-0.598399	-0.0333905	-0.911655	0.185859	0.0265068	0.914776	-0.0447876	-0.130796	-0.311887	-0.265225	-0.364644	-0.48605	-0.765784	-1.46985	-1.00444	0.459815	-0.271593	0.0913645		-1.1411	-0.332634	0.136886	-0.346287	0.843618	1.51249	-1.51826	0.772139	0.174841	-0.700094	-0.971615	2.19111	0.305812	0.291275	-0.174108	1.65632	-0.811827	-0.0615077	-0.402516	-0.452296	-0.585404	-0.0496966	-0.540286	-0.553032	-0.03218	1.52666
10.0856		-0.62179	-0.0527509	0.165682	-0.702044	-0.114803	-0.859274	0.19729	0.0152381	0.858915	-0.187499	-0.200864	-0.169871	-0.311105	-0.260607	-0.541853	-0.69812	-1.48495	-0.839113	0.42965	-0.316078	0.167919		-1.19765	-0.385739	0.0730694	-0.310961	0.755137	1.43444	-1.51626	0.73542	0.168752	-0.718344	-1.0558	2.10866	0.359571	0.307514	-0.198958	1.58399	-0.690771	-0.117225	-0.294207	-0.426384	-0.566297	-0.0362449	-0.661344	-0.487037	-0.03584	1.46896
10.1358		-0.746369	-0.0698421	0.186263	-0.803731	-0.00718557	-0.702585	0.183241	-0.0074	0.848015	-0.332877	-0.211844	-0.188277	-0.288122	-0.230658	-0.49539	-0.695179	-1.48556	-0.80849	0.357767	-0.457172	0.211533		-1.25049	-0.426829	0.00557698	-0.272531	0.661023	1.3327	-1.50618	0.665338	0.143505	-0.791446	-1.10435	2.00145	0.339983	0.319074	-0.209435	1.51813	-0.519299	-0.0572399	-0.203395	-0.348492	-0.516499	0.0016878	-0.631314	-0.421577	-0.11466	1.34881
10.186		-0.875117	-0.153547	0.158449	-0.789608	0.167032	-0.606372	0.155504	-0.0335223	0.867239	-0.459497	-0.202203	-0.380915	-0.259393	-0.253284	-0.405166	-0.713311	-1.47708	-0.865838	0.302597	-0.659638	0.211859		-1.30582	-0.50699	-0.107785	-0.323345	0.659537	1.34242	-1.48941	0.62081	0.102564	-0.885319	-1.15158	1.91315	0.247959	0.321498	-0.200408	1.45877	-0.409283	0.0106902	-0.255837	-0.241018	-0.511506	0.00365872	-0.538598	-0.407493	-0.27802	1.26346
10.2361		-0.984943	-0.20435	0.105087	-0.657839	0.235099	-0.696928	0.120658	-0.0551103	0.87047	-0.560246	-0.232954	-0.527498	-0.219964	-0.281781	-0.322817	-0.727598	-1.47632	-0.914619	0.287934	-0.78572	0.247091		-1.37271	-0.664915	-0.197077	-0.448116	0.759355	1.47876	-1.49895	0.630617	0.0394603	-0.927652	-1.20242	1.91621	0.162083	0.316499	-0.155424	1.36702	-0.449182	-0.000150766	-0.342933	-0.126322	-0.572701	-0.0369428	-0.511973	-0.372697	-0.42554	1.28558
10.2863		-1.00723	-0.203367	0.0683476	-0.552313	0.153891	-0.872726	0.0834268	-0.0583307	0.850951	-0.68295	-0.280129	-0.487408	-0.0741302	-0.281458	-0.280662	-0.762666	-1.47385	-0.938219	0.278868	-0.760284	0.369888		-1.46727	-0.854415	-0.174132	-0.513579	0.83044	1.60259	-1.53265	0.668308	-0.0173643	-0.882687	-1.24206	1.9891	0.116967	0.314064	-0.0935814	1.19055	-0.594859	-0.0672553	-0.333474	-0.0325692	-0.624448	-0.133853	-0.525928	-0.305328	-0.44249	1.3479
10.3365		-0.948086	-0.225802	0.0354998	-0.581089	0.0467339	-0.942826	0.0548518	-0.0340954	0.832078	-0.828763	-0.269446	-0.379866	0.181736	-0.263905	-0.258033	-0.84247	-1.43235	-0.979438	0.263216	-0.658253	0.519309		-1.57608	-0.974495	-0.0817498	-0.462231	0.792018	1.60011	-1.53978	0.687719	-0.0191078	-0.793929	-1.23129	2.04084	0.0703046	0.334811	-0.0715603	0.943398	-0.703637	-0.118359	-0.272069	0.0222705	-0.604581	-0.328498	-0.505401	-0.304682	-0.30651	1.3288
10.3867		-0.896608	-0.300382	-0.0183458	-0.679869	0.046783	-0.890492	0.0417803	0.00328545	0.819623	-0.872324	-0.198796	-0.324571	0.39099	-0.275267	-0.201235	-0.939493	-1.34816	-1.03047	0.275818	-0.601576	0.594968		-1.63816	-0.978901	-0.0381963	-0.395881	0.727141	1.521	-1.49661	0.665905	0.0237283	-0.74787	-1.1235	2.03591	-0.00459248	0.380382	-0.107191	0.755536	-0.712524	-0.118962	-0.250483	0.0193753	-0.556747	-0.569801	-0.480047	-0.380797	-0.10002	1.2132
10.4368		-0.900006	-0.371758	-0.0635	-0.723608	0.136631	-0.846951	0.0331463	0.0282341	0.806897	-0.718046	-0.16039	-0.20471	0.443663	-0.323676	-0.10885	-1.00106	-1.27725	-1.03582	0.31945	-0.623069	0.584308		-1.61313	-0.916962	-0.0772789	-0.411232	0.729633	1.47814	-1.45647	0.609797	0.0345374	-0.782294	-0.926591	2.0136	-0.0681967	0.414906	-0.145111	0.757076	-0.708086	-0.0940279	-0.235423	-0.0604383	-0.552629	-0.675549	-0.497645	-0.360585	0.067043	1.09628
10.487		-0.915979	-0.407678	-0.0578365	-0.701489	0.18944	-0.849471	0.00964851	0.036185	0.799323	-0.497498	-0.223238	0.10436	0.417513	-0.339204	-0.0564392	-1.01573	-1.26391	-1.00213	0.325904	-0.676385	0.56723		-1.55022	-0.860702	-0.139746	-0.459764	0.755509	1.46852	-1.48791	0.550832	-0.0325311	-0.845838	-0.730621	1.99678	-0.0873261	0.406407	-0.135242	0.887687	-0.777906	-0.0940613	-0.161883	-0.1936	-0.57109	-0.54972	-0.506884	-0.133931	0.151707	1.04794
10.5372		-0.902374	-0.439128	-0.0274226	-0.68381	0.140269	-0.807576	-0.0335445	0.0439929	0.794769	-0.453967	-0.332453	0.443386	0.40324	-0.249583	-0.10545	-1.02291	-1.27831	-1.01268	0.24133	-0.73726	0.602368		-1.52813	-0.830192	-0.185069	-0.445865	0.728673	1.38762	-1.57848	0.532614	-0.133253	-0.8672	-0.638783	1.962	-0.0992226	0.369248	-0.0984011	0.91208	-0.879554	-0.137951	-0.0865691	-0.308643	-0.544929	-0.356617	-0.449498	0.111844	0.202343	1.04498
10.5874		-0.875469	-0.475487	-0.0362407	-0.674205	0.0440723	-0.70481	-0.0804236	0.0606629	0.767311	-0.620688	-0.36763	0.565741	0.345979	-0.0818348	-0.215839	-1.05322	-1.26876	-1.10353	0.110309	-0.822278	0.646561		-1.5272	-0.800395	-0.222115	-0.376963	0.691373	1.20823	-1.64041	0.568031	-0.190324	-0.8416	-0.668487	1.89634	-0.156495	0.33339	-0.0731743	0.686093	-0.909172	-0.179541	-0.107074	-0.363441	-0.503417	-0.324299	-0.36308	0.102288	0.283694	1.03487
10.6375		-0.862522	-0.469762	-0.0881952	-0.616998	-0.0277806	-0.652685	-0.108995	0.0808061	0.707429	-0.763203	-0.298109	0.50569	0.217498	0.0615331	-0.28461	-1.0879	-1.24449	-1.1997	0.016684	-0.917537	0.604024		-1.43204	-0.745983	-0.258729	-0.321347	0.720954	1.04753	-1.6168	0.613837	-0.173069	-0.816108	-0.738447	1.80928	-0.246775	0.294583	-0.0520194	0.336631	-0.826745	-0.149369	-0.202654	-0.393714	-0.547157	-0.443947	-0.297728	-0.114754	0.392775	1.00138
10.6877		-0.865521	-0.399076	-0.124526	-0.520308	-0.0641092	-0.705783	-0.110079	0.102577	0.650524	-0.694787	-0.228158	0.483204	0.181804	0.123389	-0.269347	-1.08685	-1.25378	-1.2184	-0.0412625	-0.968008	0.444699		-1.19028	-0.662234	-0.29583	-0.273589	0.765115	1.0211	-1.5437	0.626092	-0.106536	-0.807681	-0.760308	1.68836	-0.316979	0.234994	-0.0227942	0.100311	-0.671017	-0.0331771	-0.286556	-0.447026	-0.664023	-0.534376	-0.240127	-0.205926	0.477232	0.952139
10.7379		-0.886862	-0.310711	-0.113215	-0.45409	-0.0687672	-0.770981	-0.0948006	0.12449	0.630079	-0.51859	-0.255296	0.528551	0.364101	0.135336	-0.244165	-1.03175	-1.30072	-1.17496	-0.14506	-0.959905	0.251894		-0.905134	-0.564195	-0.340551	-0.170647	0.703538	1.09467	-1.48795	0.624623	-0.0364879	-0.780836	-0.730193	1.51636	-0.353497	0.171891	-0.0174644	0.0370112	-0.510786	0.115012	-0.356972	-0.506817	-0.708471	-0.54744	-0.191708	-0.0387066	0.519858	0.889233
10.7881		-0.928298	-0.254837	-0.0770287	-0.443001	-0.0206037	-0.755436	-0.0834379	0.129358	0.630939	-0.458068	-0.331853	0.480094	0.580756	0.130924	-0.30683	-0.928722	-1.3397	-1.13417	-0.314389	-0.947871	0.141896		-0.712036	-0.476649	-0.367644	-0.0283738	0.550986	1.13482	-1.46479	0.655236	-0.000937571	-0.703479	-0.709987	1.33697	-0.390101	0.138704	-0.0515053	0.0091811	-0.404496	0.23381	-0.459529	-0.527592	-0.627911	-0.608192	-0.194943	0.122781	0.557187	0.816305
10.8383		-0.955457	-0.224528	-0.0348829	-0.462229	0.0728469	-0.693536	-0.0832742	0.10324	0.623492	-0.541632	-0.332351	0.31246	0.562993	0.0759155	-0.445072	-0.792523	-1.33977	-1.10711	-0.450203	-0.965973	0.150972		-0.612595	-0.408664	-0.318173	0.041256	0.461027	1.0757	-1.45744	0.710495	-0.00967818	-0.579455	-0.727004	1.22812	-0.449669	0.128117	-0.063338	-0.0762228	-0.35564	0.30313	-0.542785	-0.513163	-0.568362	-0.760585	-0.216956	0.0318163	0.615477	0.749207
10.8884		-0.926767	-0.195084	0.015698	-0.510477	0.137924	-0.670248	-0.08274	0.0681046	0.613888	-0.595686	-0.231898	0.18958	0.36944	-0.0694692	-0.547876	-0.64567	-1.30044	-1.06123	-0.469044	-0.970592	0.218329		-0.518965	-0.337921	-0.196727	-0.0205593	0.50999	0.977049	-1.48287	0.746596	-0.0398315	-0.419958	-0.739086	1.1939	-0.519927	0.0984206	0.00701813	-0.146213	-0.311461	0.348633	-0.505672	-0.509205	-0.643595	-0.876618	-0.151804	-0.168041	0.673779	0.702546
10.9386		-0.866312	-0.178787	0.0514143	-0.584958	0.110784	-0.697389	-0.0738927	0.0626265	0.620383	-0.51763	-0.137483	0.179037	0.294616	-0.256198	-0.561554	-0.520097	-1.21665	-1.00114	-0.427306	-0.918395	0.265453		-0.433586	-0.24314	-0.105608	-0.125682	0.597621	0.918302	-1.57209	0.758365	-0.0656599	-0.229675	-0.714621	1.15364	-0.578197	0.0365552	0.113182	-0.131488	-0.259226	0.428466	-0.386065	-0.538238	-0.730438	-0.867459	-0.0107369	-0.182648	0.698721	0.678907
10.9888		-0.844525	-0.201652	0.0291783	-0.621116	0.0246805	-0.721028	-0.0695421	0.0888548	0.626899	-0.401411	-0.141829	0.156098	0.402405	-0.382854	-0.567098	-0.446791	-1.09224	-0.972359	-0.434595	-0.850919	0.263714		-0.458739	-0.148508	-0.108166	-0.141436	0.606078	0.8927	-1.69292	0.772095	-0.08564	-0.0348967	-0.684024	1.06666	-0.606951	-0.0210178	0.155641	-0.118089	-0.28079	0.591051	-0.351573	-0.586031	-0.652499	-0.814835	0.0465419	-0.00042556	0.680997	0.679828
11.039		-0.874881	-0.251437	-0.0435547	-0.569581	-0.0272946	-0.707848	-0.0822295	0.109042	0.604216	-0.354485	-0.22263	0.0370021	0.440402	-0.425104	-0.654367	-0.441325	-0.986595	-0.994272	-0.494777	-0.840955	0.227748		-0.60615	-0.104591	-0.124896	-0.0408907	0.552537	0.841989	-1.76257	0.778459	-0.102622	0.123163	-0.665062	1.00262	-0.597051	-0.0384563	0.115365	-0.206042	-0.417463	0.803495	-0.468137	-0.636298	-0.467623	-0.811612	-0.0395724	0.148114	0.629956	0.715955
11.0891		-0.890965	-0.285595	-0.107623	-0.505038	-0.00143585	-0.680113	-0.0951635	0.0980592	0.560524	-0.321726	-0.305774	-0.0930135	0.24242	-0.460945	-0.777818	-0.485918	-0.97835	-1.04291	-0.530641	-0.882309	0.173083		-0.731423	-0.124668	-0.0565607	0.097212	0.517407	0.761443	-1.75171	0.740946	-0.101342	0.242355	-0.603404	1.04397	-0.564246	-0.0277415	0.0566832	-0.314746	-0.52835	0.942596	-0.608837	-0.679859	-0.3803	-0.811452	-0.1076	0.152764	0.561949	0.794289
11.1393		-0.845129	-0.281887	-0.136981	-0.546978	0.064754	-0.678044	-0.0781702	0.069421	0.530492	-0.187539	-0.361387	-0.143196	-0.042556	-0.545428	-0.813174	-0.521722	-1.06479	-1.09897	-0.529426	-0.891542	0.0974002		-0.730189	-0.171003	0.0490365	0.203213	0.512189	0.712791	-1.71802	0.666992	-0.0772018	0.358032	-0.464428	1.16895	-0.546003	-0.031592	0.0164618	-0.289721	-0.425356	0.911003	-0.649437	-0.703139	-0.421752	-0.741278	-0.0190746	0.111676	0.503693	0.895483
11.1895		-0.775629	-0.256088	-0.159168	-0.686526	0.115887	-0.712221	-0.0345115	0.0461943	0.523166	0.0208128	-0.402828	-0.145836	-0.186351	-0.628239	-0.728043	-0.494169	-1.15502	-1.17047	-0.546545	-0.813443	-0.0008582		-0.688278	-0.201681	0.0644172	0.275254	0.509842	0.73153	-1.71712	0.607645	-0.0585726	0.471909	-0.326795	1.28666	-0.55683	-0.0685211	-0.0259325	-0.144288	-0.141079	0.760039	-0.638877	-0.701503	-0.420848	-0.650658	0.123306	0.10551	0.482519	0.976418
11.2397		-0.748037	-0.232112	-0.176871	-0.792804	0.132588	-0.761695	-0.00893707	0.0357604	0.513251	0.149816	-0.442549	-0.159566	-0.144514	-0.641881	-0.6168	-0.428201	-1.18619	-1.26254	-0.580851	-0.684453	-0.0956002		-0.742229	-0.198401	-0.0167875	0.342958	0.539191	0.775338	-1.73535	0.583566	-0.0607814	0.54474	-0.28349	1.35545	-0.568518	-0.113049	-0.0722644	-0.0158708	0.0898086	0.642544	-0.691723	-0.692283	-0.289081	-0.62608	0.148686	0.0930702	0.494934	1.01166
11.2899		-0.769997	-0.209755	-0.148541	-0.784979	0.128129	-0.815278	-0.0367662	0.0398075	0.47938	0.130848	-0.493022	-0.174001	-0.0201498	-0.611868	-0.566821	-0.414463	-1.1936	-1.35353	-0.573081	-0.589267	-0.141351		-0.881406	-0.157925	-0.0660771	0.424168	0.641623	0.791497	-1.73578	0.566524	-0.0527086	0.579548	-0.287407	1.40521	-0.555955	-0.138658	-0.0808085	0.0879155	0.133999	0.627906	-0.799603	-0.690979	-0.137927	-0.64315	0.0906718	0.0349653	0.493881	1.02897
11.34		-0.797494	-0.162495	-0.0789884	-0.707984	0.127485	-0.893198	-0.0980998	0.0611886	0.427125	0.0712414	-0.576895	-0.168461	0.0793159	-0.610952	-0.555745	-0.483046	-1.23416	-1.41073	-0.529794	-0.571553	-0.122937		-0.994683	-0.0973325	-0.0162459	0.509007	0.771676	0.795943	-1.71792	0.540182	-0.017062	0.633545	-0.207259	1.45459	-0.531146	-0.16143	-0.0329898	0.293609	0.0864801	0.62252	-0.855181	-0.693125	-0.0707919	-0.635551	0.111691	-0.0426245	0.429778	1.07747
11.3902		-0.803614	-0.0669912	-0.0495767	-0.635827	0.14666	-1.00844	-0.137507	0.0889446	0.377807	0.0942315	-0.689431	-0.161937	0.0992866	-0.642698	-0.503213	-0.539935	-1.29079	-1.42181	-0.518222	-0.583885	-0.0826631		-1.04194	-0.0570666	0.03158	0.555679	0.847824	0.843339	-1.69992	0.528251	-0.00196463	0.713849	-0.0209884	1.46932	-0.506804	-0.211342	0.0399207	0.589019	0.0617877	0.519297	-0.819146	-0.69526	-0.0325119	-0.636454	0.222094	-0.128825	0.316398	1.15489
11.4404		-0.806095	0.0542652	-0.105631	-0.583085	0.166116	-1.12537	-0.124609	0.0981639	0.349987	0.165349	-0.772816	-0.155568	0.0661165	-0.645055	-0.386831	-0.482724	-1.30627	-1.40958	-0.523673	-0.529815	-0.0680918		-1.06804	-0.0551581	-0.0512703	0.529776	0.881498	0.941157	-1.68441	0.550382	-0.0511824	0.750659	0.156153	1.42017	-0.46198	-0.26977	0.115175	0.751233	0.0455272	0.366997	-0.759811	-0.701495	0.0519216	-0.705632	0.258777	-0.24323	0.237273	1.20041
11.4906		-0.829222	0.125919	-0.178397	-0.533023	0.139365	-1.18786	-0.0815933	0.0789976	0.347947	0.157824	-0.777073	-0.113982	0.0766321	-0.589207	-0.276397	-0.33311	-1.28515	-1.41248	-0.448689	-0.37823	-0.0605242		-1.09662	-0.0577324	-0.231491	0.473525	0.949953	1.04153	-1.67049	0.59183	-0.122318	0.728272	0.235231	1.33918	-0.3774	-0.28256	0.209015	0.637969	0.0330641	0.29865	-0.734227	-0.692878	0.127667	-0.777939	0.140897	-0.346344	0.256473	1.17887
11.5407		-0.870117	0.0889453	-0.179702	-0.484775	0.057185	-1.17544	-0.051676	0.0524717	0.359866	0.0501206	-0.73304	-0.0493588	0.17028	-0.501733	-0.252843	-0.192815	-1.29771	-1.44268	-0.287889	-0.220837	0.00280595		-1.11547	-0.0432484	-0.339429	0.482331	1.05579	1.11121	-1.66359	0.629082	-0.140915	0.755163	0.243199	1.28668	-0.277949	-0.2439	0.326859	0.398576	0.116817	0.319929	-0.717744	-0.63691	0.114161	-0.743047	-0.0116436	-0.352568	0.335788	1.13637
11.5909		-0.917999	-0.0135818	-0.125877	-0.431063	-0.0221311	-1.10025	-0.0560641	0.0454561	0.372154	-0.0476864	-0.710258	-0.0459557	0.238557	-0.392516	-0.307416	-0.11581	-1.37592	-1.47064	-0.173108	-0.166803	0.130979		-1.13902	-0.0610619	-0.285475	0.571818	1.13071	1.16263	-1.65442	0.65145	-0.0981007	0.926447	0.241082	1.27701	-0.207402	-0.21563	0.430991	0.279694	0.293452	0.287106	-0.668753	-0.553065	0.0723723	-0.630808	-0.0604077	-0.268627	0.384912	1.14257
11.6411		-0.981977	-0.0639552	-0.103188	-0.338313	-0.0448719	-0.966733	-0.0878007	0.0591266	0.385911	-0.068605	-0.710687	-0.146699	0.167055	-0.227488	-0.344642	-0.0936653	-1.4616	-1.46233	-0.194044	-0.192614	0.250223		-1.19807	-0.157686	-0.181113	0.631861	1.17714	1.2138	-1.62771	0.651089	-0.0283215	1.18005	0.246551	1.26678	-0.176406	-0.239709	0.490316	0.321316	0.359539	0.108433	-0.59534	-0.514042	0.142601	-0.558645	-0.0326864	-0.211034	0.381796	1.21158
11.6913		-1.06832	-0.0167025	-0.142419	-0.209083	-0.0323296	-0.781692	-0.130691	0.072467	0.410268	-0.080597	-0.671867	-0.270922	0.025313	0.0106944	-0.295281	-0.113685	-1.48877	-1.41854	-0.28119	-0.173381	0.290717		-1.28138	-0.283545	-0.186001	0.566072	1.2745	1.26006	-1.6054	0.627872	0.0660114	1.36651	0.253875	1.22415	-0.158714	-0.281742	0.531065	0.357452	0.179369	-0.140771	-0.52579	-0.543584	0.345276	-0.533643	-0.0463556	-0.237907	0.377574	1.3172
11.7414		-1.14524	0.0232085	-0.19376	-0.134011	-0.0334128	-0.598086	-0.166723	0.070639	0.443168	-0.163803	-0.57945	-0.306028	-0.0149501	0.273606	-0.196152	-0.143485	-1.47471	-1.36389	-0.349947	-0.0706446	0.260962		-1.34487	-0.360777	-0.276197	0.413871	1.42002	1.28877	-1.63377	0.609394	0.192201	1.41753	0.250423	1.1881	-0.130041	-0.29482	0.602772	0.25315	-0.0838545	-0.327671	-0.461349	-0.566699	0.551158	-0.469156	-0.116016	-0.26918	0.38664	1.4479
11.7916		-1.17422	-0.0718516	-0.212971	-0.190882	-0.0466601	-0.494106	-0.173217	0.0591719	0.472374	-0.291903	-0.500951	-0.257348	0.0753015	0.469017	-0.128484	-0.103933	-1.48274	-1.31443	-0.389176	0.00723955	0.210878		-1.36148	-0.406872	-0.271647	0.277177	1.49543	1.28647	-1.71027	0.626434	0.306299	1.38081	0.197207	1.23016	-0.0963088	-0.289685	0.7086	0.0361418	-0.197034	-0.391201	-0.396352	-0.508939	0.654422	-0.368467	-0.12924	-0.238622	0.360298	1.58811
11.8418		-1.17436	-0.270284	-0.206895	-0.291853	-0.0462457	-0.488811	-0.133929	0.0513641	0.491531	-0.393748	-0.494742	-0.248237	0.154243	0.515057	-0.106475	0.0435652	-1.52411	-1.27276	-0.432895	-0.0231538	0.160929		-1.32885	-0.486039	-0.108162	0.188502	1.44445	1.23957	-1.77215	0.662493	0.349125	1.32974	0.0612364	1.35912	-0.0841949	-0.29521	0.802454	-0.182349	-0.199957	-0.349143	-0.352776	-0.401859	0.686416	-0.326839	-0.0141479	-0.216072	0.288686	1.67065
11.892		-1.20481	-0.405787	-0.182975	-0.25445	-0.0446472	-0.511505	-0.0574074	0.0510473	0.499971	-0.452425	-0.564742	-0.358998	0.118231	0.393039	-0.0721336	0.214737	-1.55679	-1.24	-0.464398	-0.0784699	0.102548		-1.26034	-0.569852	0.0417691	0.112218	1.37013	1.16415	-1.77722	0.671703	0.320536	1.30656	-0.123646	1.50048	-0.106281	-0.293197	0.853653	-0.344065	-0.316069	-0.268847	-0.352815	-0.34439	0.727517	-0.359809	0.149314	-0.28078	0.239544	1.62267
11.9422		-1.27172	-0.386702	-0.109848	-0.0745689	-0.0688094	-0.472205	0.0245215	0.0520747	0.491879	-0.482877	-0.711759	-0.508235	0.0069867	0.184228	0.0141674	0.299355	-1.56511	-1.22148	-0.453255	-0.0210814	0.0376361		-1.19328	-0.572044	-0.00150706	0.0219042	1.39354	1.11083	-1.74921	0.652395	0.266642	1.3247	-0.289006	1.58417	-0.141235	-0.252948	0.884642	-0.492655	-0.607314	-0.227784	-0.374557	-0.394095	0.781347	-0.380289	0.231066	-0.367484	0.259293	1.46447
11.9923		-1.30547	-0.293577	0.0368051	0.0148754	-0.114169	-0.338681	0.0767425	0.0506139	0.464586	-0.484916	-0.924369	-0.537478	-0.110038	0.0354374	0.119479	0.304468	-1.57136	-1.23311	-0.423022	0.140116	-0.0228417		-1.16398	-0.509902	-0.173405	-0.0787603	1.50561	1.09629	-1.7269	0.647634	0.223883	1.35728	-0.41878	1.61103	-0.16171	-0.202942	0.932937	-0.696071	-0.916491	-0.210867	-0.376452	-0.527377	0.801235	-0.351374	0.217335	-0.363774	0.309778	1.30356
12.0425		-1.25683	-0.235889	0.221176	-0.12803	-0.172767	-0.139884	0.0796096	0.0516298	0.435625	-0.477492	-1.10103	-0.403403	-0.222631	0.0328494	0.169628	0.306296	-1.56908	-1.29323	-0.423254	0.252386	-0.0820253		-1.15792	-0.499434	-0.263154	-0.171236	1.61411	1.06886	-1.71986	0.659513	0.208738	1.33497	-0.53363	1.60604	-0.176505	-0.201734	0.997286	-0.923098	-1.09931	-0.0803122	-0.358085	-0.665199	0.799338	-0.329101	0.207924	-0.29163	0.33593	1.21969
12.0927		-1.17034	-0.203705	0.379236	-0.306443	-0.250461	0.0609113	0.0441631	0.061249	0.431153	-0.507286	-1.10949	-0.234456	-0.319885	0.106851	0.113428	0.303888	-1.51879	-1.38269	-0.466477	0.206456	-0.145197		-1.13319	-0.581345	-0.205053	-0.219839	1.66277	0.993377	-1.73182	0.630696	0.214513	1.21888	-0.600527	1.55698	-0.2189	-0.243971	1.04135	-1.05735	-1.1431	0.238172	-0.35353	-0.713307	0.845811	-0.340745	0.260877	-0.25339	0.329604	1.20315
12.1429		-1.12715	-0.133474	0.486647	-0.241769	-0.312471	0.173093	0.0169154	0.0764868	0.453538	-0.565515	-0.969932	-0.179209	-0.3536	0.109259	-0.0289485	0.238035	-1.42827	-1.43648	-0.521274	0.0438844	-0.19964		-1.10136	-0.674659	-0.13337	-0.196236	1.65877	0.915266	-1.77265	0.544906	0.194002	1.07467	-0.551114	1.45183	-0.293022	-0.254773	1.03963	-1.07919	-1.09668	0.58709	-0.36662	-0.633793	0.957509	-0.341374	0.314361	-0.246016	0.302226	1.20836
12.193		-1.14665	-0.0453728	0.557475	0.0284184	-0.294898	0.117772	0.0449574	0.0875462	0.477552	-0.573089	-0.858284	-0.243614	-0.309912	-0.0114015	-0.171073	0.128756	-1.37057	-1.42241	-0.532117	-0.127697	-0.237194		-1.1226	-0.717347	-0.162076	-0.135323	1.64088	0.879026	-1.82356	0.480141	0.111185	1.01036	-0.403716	1.33541	-0.362991	-0.186792	0.999451	-1.13241	-1.02436	0.732997	-0.364588	-0.515241	1.05841	-0.312563	0.286002	-0.185155	0.261178	1.20963
12.2432		-1.17848	-0.0133555	0.589408	0.23223	-0.222344	-0.072493	0.115113	0.0897077	0.484462	-0.511659	-0.877689	-0.31422	-0.227879	-0.166174	-0.240101	0.0682479	-1.39355	-1.40059	-0.439291	-0.261166	-0.279895		-1.20884	-0.732179	-0.250689	-0.124161	1.64643	0.849913	-1.84067	0.510396	0.0272125	1.02957	-0.282911	1.26177	-0.399189	-0.0778131	0.942679	-1.30336	-0.993105	0.648035	-0.348128	-0.517385	1.07504	-0.292151	0.19236	-0.0978328	0.236027	1.18851
12.2934		-1.1727	-0.0412797	0.557876	0.281098	-0.21327	-0.225552	0.151424	0.0875374	0.485623	-0.485365	-0.946167	-0.312011	-0.112373	-0.265105	-0.254825	0.0785708	-1.46395	-1.43715	-0.23862	-0.381491	-0.345101		-1.29745	-0.732771	-0.312696	-0.2051	1.66841	0.785456	-1.81469	0.606597	0.044176	1.01596	-0.291598	1.21906	-0.402922	0.00206164	0.886028	-1.44379	-1.00094	0.492102	-0.372528	-0.69495	1.02145	-0.277687	0.118753	-0.129025	0.266225	1.12353
12.3436		-1.13035	-0.0732685	0.467282	0.349303	-0.308519	-0.189388	0.103585	0.0860284	0.504345	-0.568851	-0.956573	-0.275313	0.0704872	-0.324021	-0.285004	0.089056	-1.52469	-1.48687	-0.0355942	-0.509926	-0.395372		-1.33635	-0.687878	-0.3293	-0.319755	1.6544	0.708144	-1.78167	0.689873	0.140298	0.895303	-0.425027	1.16918	-0.380734	0.0271088	0.838397	-1.37069	-0.965953	0.361231	-0.46981	-0.915278	0.961248	-0.215313	0.0911877	-0.32596	0.34245	1.02709
12.3937		-1.09206	-0.102391	0.366051	0.530138	-0.407354	-0.0186757	0.0167059	0.083589	0.546825	-0.672115	-0.915494	-0.290545	0.271723	-0.390682	-0.334302	0.0619731	-1.55554	-1.45275	0.0315249	-0.626817	-0.367833		-1.33282	-0.614659	-0.305575	-0.373116	1.58968	0.635805	-1.76376	0.735934	0.174699	0.739047	-0.61789	1.12864	-0.329621	0.0252318	0.799635	-1.14164	-0.85584	0.219302	-0.595252	-1.00166	0.917928	-0.124074	0.0435382	-0.544559	0.412762	0.957454
12.4439		-1.09272	-0.165703	0.298159	0.671641	-0.436247	0.0840069	-0.0251037	0.0768403	0.600709	-0.664928	-0.865897	-0.376779	0.349271	-0.442207	-0.324444	0.0351123	-1.55254	-1.34517	-0.0456636	-0.71654	-0.258286		-1.30853	-0.594223	-0.226907	-0.33142	1.5351	0.529233	-1.75003	0.763826	0.100456	0.647591	-0.802707	1.12699	-0.258872	0.0344559	0.761781	-0.948636	-0.747187	0.060023	-0.684316	-0.927637	0.849912	-0.0982988	-0.0545981	-0.617004	0.457381	0.960909
12.4941		-1.12875	-0.244996	0.26785	0.641401	-0.451716	0.0199941	-0.00609666	0.067086	0.653115	-0.58235	-0.802297	-0.4651	0.24407	-0.438384	-0.217045	0.026515	-1.50327	-1.27015	-0.128499	-0.810495	-0.138549		-1.27352	-0.65177	-0.126115	-0.240394	1.52598	0.385014	-1.74252	0.758899	0.0512874	0.601707	-0.91247	1.11625	-0.197627	0.0654154	0.727313	-0.835619	-0.699237	-0.034308	-0.72527	-0.816677	0.70954	-0.116766	-0.0920849	-0.524615	0.504434	1.01954
12.5443		-1.16553	-0.276798	0.258091	0.541778	-0.502998	-0.111335	0.0186276	0.05793	0.698222	-0.586002	-0.728384	-0.490598	0.0658742	-0.42808	-0.095864	0.000410632	-1.42148	-1.25493	-0.115476	-0.945165	-0.0801333		-1.25309	-0.720115	-0.0966743	-0.165452	1.5081	0.284002	-1.76041	0.681043	0.144436	0.521534	-0.909834	1.02906	-0.167286	0.09813	0.721897	-0.727789	-0.680504	-0.0297034	-0.747122	-0.775137	0.52023	-0.00328911	0.0685548	-0.377412	0.56353	1.07896
12.5945		-1.16457	-0.262273	0.253979	0.528913	-0.531492	-0.190623	0.0168946	0.0508778	0.733323	-0.739357	-0.681357	-0.475859	-0.0555475	-0.500969	-0.0836397	-0.0467783	-1.36321	-1.20783	-0.0671191	-1.08715	-0.0905959		-1.26636	-0.754392	-0.164611	-0.133421	1.45173	0.271037	-1.78816	0.540892	0.305376	0.419661	-0.846551	0.915133	-0.163216	0.111673	0.766216	-0.64883	-0.679271	-0.0185	-0.772336	-0.790893	0.377097	0.299403	0.376218	-0.298385	0.599601	1.11335
12.6446		-1.09332	-0.269815	0.238828	0.576199	-0.492597	-0.23049	0.0156828	0.0453043	0.761167	-0.929864	-0.642747	-0.491253	-0.097833	-0.64243	-0.198468	-0.0621594	-1.36518	-1.08643	-0.0856224	-1.14825	-0.131178		-1.26599	-0.777652	-0.234026	-0.125317	1.43126	0.285843	-1.78177	0.410846	0.377834	0.378427	-0.831721	0.898916	-0.168544	0.117811	0.83541	-0.673729	-0.751352	-0.114196	-0.808897	-0.793781	0.339049	0.572715	0.607614	-0.339326	0.590975	1.13784
12.6948		-0.935566	-0.315577	0.19455	0.570431	-0.447725	-0.288139	0.0369758	0.036934	0.794918	-1.01947	-0.54425	-0.544511	-0.0719185	-0.726281	-0.331132	-0.0311943	-1.39546	-0.985099	-0.147848	-1.09074	-0.165267		-1.18068	-0.782291	-0.235817	-0.111417	1.48731	0.277719	-1.74204	0.352888	0.326505	0.39843	-0.908138	0.985309	-0.170752	0.151471	0.873845	-0.728208	-0.882496	-0.323995	-0.859519	-0.751922	0.339012	0.622101	0.634075	-0.435586	0.565367	1.16238
12.745		-0.733494	-0.327819	0.123814	0.529116	-0.45308	-0.335729	0.0583842	0.0166321	0.845962	-0.989007	-0.414412	-0.562772	0.0383476	-0.66791	-0.370164	-0.00803285	-1.40289	-0.985851	-0.158084	-0.97969	-0.181789		-1.04066	-0.711195	-0.239508	-0.0892834	1.52194	0.271884	-1.72196	0.362408	0.242173	0.393003	-1.00356	1.02631	-0.161281	0.220022	0.859954	-0.667577	-0.939957	-0.540146	-0.917765	-0.688853	0.265469	0.59234	0.550837	-0.439379	0.550038	1.16748
12.7952		-0.595749	-0.252242	0.0591378	0.549043	-0.476487	-0.315221	0.0623733	-0.0179563	0.901635	-0.921173	-0.389336	-0.501957	0.17149	-0.523089	-0.324707	-0.0130609	-1.39005	-1.02008	-0.118872	-0.908035	-0.199319		-0.974406	-0.592069	-0.323568	-0.0872	1.46271	0.263248	-1.74466	0.380178	0.204422	0.336367	-1.02768	0.922234	-0.129677	0.284128	0.834499	-0.517076	-0.850986	-0.625643	-0.975003	-0.649721	0.122629	0.738592	0.481421	-0.270118	0.522196	1.14601
12.8453		-0.598151	-0.124754	0.033495	0.599864	-0.488789	-0.256358	0.0728546	-0.0481921	0.928404	-0.898111	-0.506719	-0.42221	0.165814	-0.419976	-0.296079	0.0107732	-1.39431	-0.971652	-0.132161	-0.898426	-0.249176		-1.03562	-0.562369	-0.422174	-0.127814	1.41192	0.190086	-1.77268	0.343804	0.221088	0.299344	-0.980744	0.751077	-0.0637523	0.306696	0.850489	-0.422421	-0.718178	-0.52893	-1.03252	-0.668735	0.0197758	0.991697	0.39575	-0.0259535	0.448556	1.13899
12.8955		-0.684341	-0.0195551	0.0403988	0.549815	-0.515221	-0.246813	0.108463	-0.0478823	0.910389	-0.92535	-0.612739	-0.40902	-0.0270341	-0.436595	-0.333952	0.0888919	-1.41587	-0.854648	-0.24329	-0.902282	-0.326772		-1.11208	-0.673777	-0.421472	-0.193624	1.47326	0.0886472	-1.77936	0.240016	0.269445	0.315604	-0.940622	0.637431	0.0411797	0.299104	0.910718	-0.395052	-0.678148	-0.348908	-1.08373	-0.736444	-0.00182276	1.05712	0.236148	0.127481	0.358081	1.18195
12.9457		-0.735899	0.0191976	0.0340468	0.394986	-0.544867	-0.315295	0.141481	-0.0168405	0.877013	-0.928874	-0.566389	-0.449616	-0.218241	-0.550723	-0.370584	0.149625	-1.41742	-0.788861	-0.393562	-0.86982	-0.370595		-1.07199	-0.782151	-0.345552	-0.239341	1.54872	0.109803	-1.79155	0.120641	0.33107	0.321394	-0.959635	0.579914	0.167563	0.295905	0.97013	-0.311261	-0.733687	-0.245365	-1.09745	-0.790394	-0.0171259	0.898737	0.0980359	0.15694	0.329832	1.2266
12.9959		-0.735037	-0.0199275	-0.0169322	0.297879	-0.515055	-0.406009	0.141947	0.0162612	0.874391	-0.840506	-0.436444	-0.445119	-0.208819	-0.673355	-0.326442	0.135042	-1.39413	-0.826616	-0.527553	-0.793993	-0.332215		-0.939481	-0.739689	-0.314009	-0.237096	1.49551	0.275846	-1.82799	0.0530146	0.39405	0.269228	-0.998091	0.489596	0.277731	0.304623	0.989558	-0.148395	-0.780912	-0.245455	-1.05139	-0.773888	-0.0581676	0.779757	0.118921	0.156516	0.398794	1.17885
13.0461		-0.772872	-0.125544	-0.0796761	0.349229	-0.432643	-0.445296	0.128861	0.0333729	0.908622	-0.698309	-0.390549	-0.340199	-0.040916	-0.728946	-0.226853	0.0981835	-1.38962	-0.897132	-0.636989	-0.701348	-0.256443		-0.840865	-0.609425	-0.349497	-0.197615	1.37687	0.383101	-1.84595	0.045903	0.450999	0.212469	-0.972992	0.347298	0.347667	0.309113	0.968273	-0.0303377	-0.732062	-0.20846	-0.967549	-0.709202	-0.0282012	0.797964	0.247869	0.167622	0.507731	1.02597
13.0962		-0.891461	-0.254002	-0.0882542	0.428175	-0.395508	-0.395895	0.137282	0.0500748	0.936868	-0.615735	-0.46181	-0.183359	0.117168	-0.727274	-0.150803	0.108048	-1.42427	-0.921964	-0.68894	-0.623972	-0.235535		-0.812386	-0.564694	-0.364017	-0.149008	1.34644	0.282631	-1.79869	0.0432572	0.489966	0.226331	-0.870474	0.233756	0.39541	0.305988	0.923813	-0.0223508	-0.589241	-0.0474206	-0.887121	-0.675587	0.144542	0.74548	0.288836	0.13032	0.569861	0.864978
13.1464		-1.01481	-0.349754	-0.0339379	0.390608	-0.457763	-0.269682	0.162351	0.0841703	0.922127	-0.628793	-0.539569	-0.0456415	0.228074	-0.744226	-0.108876	0.129509	-1.45419	-0.904043	-0.629477	-0.575956	-0.285798		-0.760037	-0.631496	-0.329914	-0.10943	1.37488	0.111941	-1.71883	-0.0024406	0.489074	0.306554	-0.774924	0.210107	0.456174	0.305275	0.861314	-0.0311882	-0.455524	0.108686	-0.836647	-0.711484	0.358209	0.541422	0.167968	0.0224907	0.551191	0.786333
13.1966		-1.06817	-0.393519	0.0104628	0.295961	-0.570251	-0.107196	0.176962	0.119078	0.877623	-0.640063	-0.549996	0.0602732	0.350358	-0.809069	-0.0650308	0.0988437	-1.43184	-0.881624	-0.49285	-0.546681	-0.332781		-0.616217	-0.660678	-0.330021	-0.0814702	1.32327	0.0865823	-1.69192	-0.0762651	0.440454	0.390156	-0.754892	0.239013	0.531601	0.305597	0.782071	0.0574355	-0.454489	0.0904996	-0.845051	-0.774696	0.449242	0.444096	0.025251	-0.0830723	0.474053	0.788713
13.2468		-1.08143	-0.404312	-0.0184219	0.314795	-0.665035	0.0705806	0.181181	0.121457	0.841398	-0.558368	-0.528191	0.144036	0.432919	-0.842943	-0.0491653	0.058905	-1.37137	-0.861912	-0.403494	-0.521551	-0.32605		-0.450961	-0.540655	-0.411672	-0.061539	1.22691	0.180697	-1.74911	-0.130771	0.369615	0.436073	-0.757907	0.248249	0.589098	0.302913	0.712827	0.231657	-0.576019	-0.059069	-0.944952	-0.799236	0.408719	0.624951	0.0161474	-0.142743	0.37583	0.824588
13.2969		-1.1262	-0.393474	-0.092084	0.454313	-0.71069	0.270187	0.190559	0.088687	0.822377	-0.427013	-0.517533	0.183624	0.358418	-0.755425	-0.121642	0.0932326	-1.31803	-0.839461	-0.429736	-0.506365	-0.298652		-0.39062	-0.325066	-0.508463	-0.0541562	1.25873	0.198195	-1.82918	-0.142412	0.307785	0.45535	-0.681494	0.227362	0.614345	0.318402	0.693666	0.364597	-0.659704	-0.164068	-1.10667	-0.755157	0.381035	0.839263	0.12463	-0.213358	0.294899	0.862799
13.3471		-1.20953	-0.356173	-0.135687	0.537001	-0.697075	0.455433	0.193098	0.0565519	0.795378	-0.349056	-0.51004	0.178289	0.170137	-0.578907	-0.222664	0.158291	-1.28283	-0.832338	-0.519716	-0.515683	-0.288475		-0.477521	-0.134101	-0.555946	-0.0779033	1.42335	0.0860412	-1.85933	-0.120978	0.261395	0.483265	-0.525254	0.222568	0.633714	0.379345	0.723699	0.338343	-0.614746	-0.18429	-1.21694	-0.65592	0.45178	0.796892	0.220046	-0.342937	0.265145	0.883312
13.3973		-1.2769	-0.313073	-0.131032	0.485026	-0.652019	0.529829	0.162486	0.0555691	0.744337	-0.338314	-0.516787	0.207411	0.0605501	-0.44654	-0.203479	0.122265	-1.24931	-0.853105	-0.603107	-0.54215	-0.267812		-0.642436	-0.00948893	-0.589121	-0.14124	1.52163	-0.0123899	-1.83648	-0.0850579	0.228425	0.526582	-0.394435	0.260778	0.668401	0.467231	0.746079	0.173655	-0.569019	-0.219986	-1.18806	-0.546097	0.533483	0.616381	0.229389	-0.477398	0.284995	0.872955
13.4475		-1.2893	-0.310681	-0.128445	0.467215	-0.648237	0.463575	0.10564	0.0749191	0.685996	-0.32385	-0.60193	0.330919	0.114657	-0.437076	-0.0541271	-0.027813	-1.22287	-0.873809	-0.660825	-0.562411	-0.195798		-0.776665	0.102845	-0.661534	-0.210055	1.44819	0.00539616	-1.80351	-0.0463406	0.214481	0.530095	-0.35886	0.324822	0.693148	0.522698	0.711422	0.0342586	-0.674224	-0.28602	-1.05698	-0.48081	0.49917	0.585546	0.189032	-0.535424	0.311219	0.847102
13.4976		-1.26966	-0.355619	-0.165151	0.653883	-0.716976	0.370303	0.0572857	0.0805551	0.64627	-0.279431	-0.781686	0.445114	0.219639	-0.49518	0.0450156	-0.15911	-1.22727	-0.865214	-0.673367	-0.57237	-0.0950205		-0.806145	0.265382	-0.741356	-0.235434	1.32174	0.0765249	-1.77473	-0.00187897	0.208417	0.434735	-0.387461	0.392748	0.669914	0.518148	0.63822	0.0406374	-0.84722	-0.293585	-0.920753	-0.480902	0.363264	0.652282	0.155288	-0.512619	0.312862	0.821763
13.5478		-1.28535	-0.390196	-0.218049	0.946503	-0.79032	0.35229	0.0313462	0.0615465	0.631391	-0.269743	-0.949118	0.365181	0.254621	-0.514668	-0.0213406	-0.200688	-1.26253	-0.85052	-0.60844	-0.589666	-0.0293045		-0.736585	0.468327	-0.76072	-0.231106	1.26655	0.104897	-1.72467	0.0704092	0.179376	0.29508	-0.426085	0.448746	0.608842	0.494478	0.584303	0.103002	-0.870906	-0.259591	-0.816113	-0.509914	0.265985	0.53184	0.131654	-0.46409	0.307674	0.764681
13.598		-1.37661	-0.370124	-0.249841	1.1099	-0.794051	0.339038	0.01185	0.0418075	0.629254	-0.350244	-0.978234	0.0858852	0.23385	-0.44731	-0.136773	-0.237631	-1.30691	-0.875812	-0.501699	-0.622274	-0.0331505		-0.656547	0.63893	-0.721047	-0.275754	1.24116	0.0909838	-1.63987	0.190306	0.127705	0.26583	-0.461944	0.455384	0.561202	0.505695	0.571755	0.0494126	-0.704571	-0.310082	-0.7298	-0.527762	0.297311	0.233212	0.103096	-0.437662	0.316322	0.64337
13.6482		-1.48149	-0.33458	-0.266101	1.09901	-0.751121	0.211998	-0.0108145	0.0421554	0.624464	-0.471545	-0.878793	-0.1625	0.219691	-0.305758	-0.15334	-0.342056	-1.35231	-0.941207	-0.45681	-0.665584	-0.100279		-0.657978	0.741883	-0.681164	-0.400771	1.16199	0.0876226	-1.54249	0.341378	0.101045	0.405122	-0.497493	0.376744	0.550731	0.554729	0.567981	-0.112594	-0.522889	-0.424766	-0.679934	-0.553519	0.393375	0.0771957	0.0985392	-0.463293	0.309477	0.514772
13.6984		-1.46673	-0.352565	-0.294057	1.07319	-0.737098	0.0252452	-0.0260147	0.0481169	0.604791	-0.528889	-0.772864	-0.192755	0.201604	-0.114421	-0.124266	-0.444931	-1.39793	-1.00606	-0.517507	-0.729776	-0.213371		-0.718888	0.847715	-0.670383	-0.525273	1.05613	0.109395	-1.45779	0.482591	0.128001	0.567939	-0.530124	0.248402	0.544249	0.608746	0.535194	-0.225571	-0.462489	-0.398298	-0.697081	-0.627685	0.420733	0.168208	0.164487	-0.558979	0.241943	0.477367
13.7485		-1.27835	-0.420377	-0.319831	1.12086	-0.780928	-0.0547875	-0.0256668	0.0316268	0.566713	-0.497542	-0.729598	-0.0896275	0.124127	0.0870619	-0.180685	-0.464666	-1.41765	-1.0534	-0.612809	-0.830608	-0.340449		-0.702138	1.04426	-0.673208	-0.560107	0.994162	0.132091	-1.3861	0.601493	0.171814	0.592564	-0.572916	0.167299	0.503114	0.65348	0.473124	-0.251205	-0.488649	-0.155725	-0.750533	-0.72309	0.328427	0.221847	0.26766	-0.700876	0.125524	0.529235
13.7987		-1.02385	-0.46411	-0.294385	1.1649	-0.849816	0.0110942	-0.016568	-0.00582999	0.523154	-0.46374	-0.714997	-0.0560159	-0.0161031	0.225134	-0.280843	-0.451533	-1.38205	-1.10031	-0.666542	-0.944307	-0.420544		-0.517457	1.28962	-0.68046	-0.532382	0.964034	0.141771	-1.31585	0.724007	0.183591	0.524023	-0.63247	0.179899	0.436905	0.699449	0.410921	-0.301205	-0.511623	0.0914321	-0.778714	-0.756958	0.188535	0.0250737	0.276784	-0.808619	0.026039	0.570026
13.8489		-0.847038	-0.432419	-0.217396	1.15192	-0.883262	0.109953	-0.0101022	-0.0331343	0.494299	-0.49028	-0.718225	-0.119196	-0.150887	0.253528	-0.276185	-0.495503	-1.31559	-1.14363	-0.69075	-1.01209	-0.405409		-0.259098	1.43883	-0.698608	-0.536427	0.904256	0.155862	-1.24679	0.857606	0.16969	0.527184	-0.655554	0.224479	0.382626	0.747077	0.374854	-0.393943	-0.488209	0.13947	-0.776389	-0.698072	0.0982664	-0.255543	0.105665	-0.797052	-0.01777	0.557751
13.8991		-0.763497	-0.332699	-0.167288	1.14471	-0.825406	0.167473	-0.0163745	-0.0319765	0.483265	-0.507059	-0.810412	-0.133475	-0.215962	0.232973	-0.174647	-0.573955	-1.28387	-1.14806	-0.73184	-1.00909	-0.318912		-0.12543	1.43087	-0.713455	-0.59733	0.810493	0.207516	-1.18916	0.961469	0.168968	0.625137	-0.5684	0.214504	0.346878	0.780686	0.369867	-0.416666	-0.406661	0.0665421	-0.77642	-0.601448	0.0748781	-0.387576	-0.135528	-0.659719	-0.04162	0.558337
13.9492		-0.696508	-0.186082	-0.202218	1.17354	-0.683043	0.219656	-0.0411529	-0.0205218	0.473095	-0.410162	-1.0066	-0.0327964	-0.230403	0.275018	-0.132862	-0.608331	-1.30896	-1.10825	-0.788505	-0.974744	-0.234935		-0.203415	1.35307	-0.693672	-0.662764	0.735818	0.303809	-1.14373	1.00003	0.184877	0.670473	-0.393095	0.138528	0.298749	0.801354	0.383016	-0.369848	-0.308209	0.0453948	-0.764569	-0.527202	0.0619543	-0.426412	-0.221368	-0.50363	-0.10264	0.607609
13.9994		-0.635095	-0.0133732	-0.266192	1.16203	-0.552026	0.298933	-0.0717806	-0.0291171	0.453807	-0.237691	-1.16998	0.0769778	-0.275419	0.389678	-0.192561	-0.615575	-1.34153	-1.07917	-0.827588	-0.949873	-0.190359		-0.382085	1.28834	-0.641792	-0.702925	0.709454	0.389161	-1.09135	0.999234	0.182045	0.573754	-0.25973	0.048279	0.221283	0.842055	0.396334	-0.399905	-0.314451	0.0441449	-0.693771	-0.486968	0.0176429	-0.550412	-0.0878399	-0.471065	-0.19824	0.631948
14.0496		-0.648218	0.134823	-0.261284	1.08444	-0.516788	0.367298	-0.0801883	-0.063264	0.435431	-0.145176	-1.1666	0.0937161	-0.377466	0.464867	-0.228491	-0.68088	-1.34106	-1.111	-0.834737	-0.916128	-0.160885		-0.492182	1.20408	-0.607791	-0.7336	0.70215	0.385132	-1.0167	1.0209	0.15064	0.423765	-0.265233	-0.0114537	0.145129	0.937689	0.396221	-0.517432	-0.488878	-0.0664576	-0.58107	-0.481191	-0.0374556	-0.738013	0.0576054	-0.588095	-0.27396	0.564776
14.0998		-0.744058	0.208273	-0.196638	1.0615	-0.534976	0.372525	-0.0621578	-0.0963728	0.425425	-0.201616	-1.05422	0.0577933	-0.454136	0.423177	-0.191743	-0.804706	-1.34313	-1.18108	-0.810066	-0.836195	-0.133396		-0.490947	1.05172	-0.626783	-0.755952	0.665705	0.296059	-0.948539	1.09684	0.138594	0.343516	-0.365953	-0.0276108	0.11576	1.08827	0.376611	-0.539349	-0.688719	-0.223985	-0.519301	-0.523187	-0.064356	-0.826855	-0.0105475	-0.715871	-0.31217	0.451365
14.1499		-0.822528	0.230674	-0.180821	1.18738	-0.503228	0.298192	-0.0566401	-0.0968196	0.413872	-0.310522	-1.0019	0.0651082	-0.423602	0.313495	-0.204652	-0.89361	-1.40648	-1.22705	-0.749136	-0.734374	-0.147164		-0.480978	0.879775	-0.656659	-0.753159	0.591169	0.23041	-0.949876	1.20587	0.193387	0.332637	-0.441126	-0.00777478	0.135881	1.26001	0.339685	-0.416427	-0.71539	-0.247967	-0.571177	-0.607712	-0.0670935	-0.775589	-0.245118	-0.700887	-0.36057	0.366275
14.2001		-0.807189	0.273406	-0.255328	1.34709	-0.421203	0.168746	-0.096265	-0.0636389	0.395215	-0.361762	-1.06278	0.12343	-0.324739	0.210451	-0.336347	-0.908473	-1.51755	-1.2289	-0.663031	-0.688428	-0.221934		-0.563258	0.770798	-0.611456	-0.736543	0.526705	0.27008	-1.03843	1.29771	0.283881	0.314414	-0.420255	0.0234087	0.156739	1.41821	0.292719	-0.358796	-0.596191	-0.148713	-0.689622	-0.70506	-0.0853259	-0.676038	-0.412146	-0.533017	-0.4403	0.29956
14.2503		-0.749546	0.343182	-0.328421	1.33317	-0.394374	0.0591228	-0.153782	-0.0348259	0.382767	-0.365049	-1.14191	0.154202	-0.26422	0.126202	-0.462402	-0.920343	-1.59739	-1.21756	-0.594652	-0.737197	-0.292715		-0.698189	0.734669	-0.469807	-0.729174	0.519225	0.366223	-1.13924	1.32846	0.319071	0.26784	-0.320762	0.0426085	0.133393	1.54825	0.239697	-0.480414	-0.545185	-0.111407	-0.766431	-0.786903	-0.135517	-0.581065	-0.413096	-0.295607	-0.4772	0.204413
14.3005		-0.748458	0.372118	-0.3184	1.12147	-0.475077	0.0676176	-0.174923	-0.0489679	0.381929	-0.380043	-1.16218	0.108771	-0.284462	0.0819262	-0.458482	-0.991289	-1.60145	-1.21247	-0.588493	-0.835256	-0.288495		-0.729598	0.726416	-0.32072	-0.722694	0.538588	0.428605	-1.16197	1.29578	0.259134	0.231717	-0.210141	0.0654628	0.0808085	1.64227	0.179545	-0.564718	-0.656868	-0.188033	-0.750208	-0.816541	-0.188473	-0.482743	-0.36101	-0.0372293	-0.39165	0.10197
14.3507		-0.812711	0.337917	-0.277289	0.917638	-0.591246	0.215647	-0.154346	-0.0951205	0.371981	-0.401538	-1.14434	0.0425889	-0.351052	0.151922	-0.390131	-1.08247	-1.56506	-1.19965	-0.653141	-0.911869	-0.251354		-0.563546	0.705964	-0.267115	-0.704375	0.515095	0.468887	-1.11313	1.24765	0.173055	0.20378	-0.172104	0.138548	0.0580871	1.68305	0.117741	-0.400334	-0.819121	-0.250983	-0.693536	-0.750069	-0.216502	-0.410197	-0.352378	0.20355	-0.23093	0.051576
14.4008		-0.863308	0.309771	-0.298091	0.90152	-0.645512	0.394012	-0.136707	-0.119427	0.341146	-0.395552	-1.12485	0.0580594	-0.429732	0.340177	-0.38818	-1.12354	-1.53516	-1.17619	-0.758397	-0.943459	-0.282237		-0.31425	0.635961	-0.300409	-0.691486	0.465351	0.561853	-1.07933	1.22999	0.158453	0.12108	-0.266511	0.275441	0.0915021	1.66386	0.0707363	-0.151967	-0.921755	-0.262327	-0.669282	-0.612408	-0.240176	-0.406019	-0.345672	0.333884	-0.13443	0.04804
14.451		-0.852006	0.340182	-0.364395	1.02052	-0.613781	0.465542	-0.146062	-0.0937338	0.317839	-0.386651	-1.09816	0.17772	-0.509973	0.509483	-0.448614	-1.11195	-1.50107	-1.16739	-0.852473	-0.953039	-0.365873		-0.217857	0.496423	-0.31875	-0.689076	0.489145	0.688979	-1.10565	1.22693	0.235284	-0.0350972	-0.468177	0.430735	0.136295	1.62042	0.0472801	-0.125353	-0.964522	-0.332202	-0.669242	-0.518844	-0.298681	-0.430629	-0.304959	0.308499	-0.16637	0.031561
14.5012		-0.817651	0.387536	-0.387452	1.10818	-0.531758	0.415344	-0.160377	-0.053948	0.332637	-0.41439	-1.05701	0.315696	-0.587142	0.540252	-0.478304	-1.09583	-1.42947	-1.18109	-0.885071	-0.968522	-0.36748		-0.371601	0.341516	-0.271213	-0.667842	0.598798	0.729005	-1.15243	1.192	0.35172	-0.175821	-0.666414	0.55563	0.140501	1.61118	0.0341148	-0.275266	-0.955047	-0.45334	-0.638505	-0.53273	-0.38201	-0.404775	-0.295501	0.221594	-0.24682	-0.01218
14.5514		-0.817557	0.388124	-0.355305	1.12764	-0.441666	0.354657	-0.161681	-0.0457181	0.365476	-0.447678	-1.0163	0.404054	-0.663928	0.47972	-0.451058	-1.1027	-1.33838	-1.18828	-0.84209	-1.00338	-0.245253		-0.616022	0.258868	-0.227621	-0.632489	0.664439	0.623432	-1.17925	1.13277	0.460387	-0.197772	-0.769951	0.648855	0.128227	1.65122	0.0156852	-0.243216	-0.883321	-0.430786	-0.590713	-0.563143	-0.431798	-0.334523	-0.352891	0.15983	-0.25419	-0.03839
14.6015		-0.849259	0.339034	-0.343618	1.16434	-0.372578	0.373509	-0.165761	-0.055269	0.369178	-0.447569	-0.985455	0.483558	-0.727925	0.435423	-0.39858	-1.12886	-1.28579	-1.17352	-0.763179	-1.05428	-0.136159		-0.730879	0.240726	-0.272001	-0.640189	0.607402	0.46467	-1.20529	1.10559	0.543684	-0.11219	-0.797378	0.734816	0.17258	1.6927	-0.000531009	0.11338	-0.816047	-0.198647	-0.600383	-0.509136	-0.41651	-0.306743	-0.384209	0.0592317	-0.14209	-0.03291
14.6517		-0.865631	0.268777	-0.388024	1.21312	-0.335577	0.433675	-0.186558	-0.0345825	0.33609	-0.476993	-0.970475	0.603402	-0.722932	0.411432	-0.307796	-1.16309	-1.29187	-1.16453	-0.702776	-1.09393	-0.14621		-0.692655	0.19362	-0.368623	-0.700092	0.531589	0.375337	-1.25841	1.12039	0.594394	-0.030284	-0.828528	0.823638	0.284494	1.69462	0.00191349	0.487475	-0.852343	-0.0011688	-0.672394	-0.429612	-0.364739	-0.371732	-0.301672	-0.143624	0.041464	-0.04455
14.7019		-0.843106	0.185973	-0.438796	1.15469	-0.318796	0.437394	-0.208427	0.018196	0.302787	-0.617739	-0.994986	0.710566	-0.62539	0.362886	-0.138534	-1.18071	-1.31906	-1.18491	-0.672529	-1.08495	-0.188746		-0.65841	0.107174	-0.396131	-0.740672	0.550363	0.357241	-1.31853	1.11752	0.62539	-0.0328232	-0.888628	0.912442	0.383685	1.68794	0.0162524	0.509444	-0.960613	-0.0874459	-0.721638	-0.433909	-0.309336	-0.494013	-0.176053	-0.340206	0.191543	-0.10375
14.7521		-0.806371	0.0986776	-0.447995	0.983518	-0.304026	0.373686	-0.212571	0.0533512	0.292409	-0.797956	-1.05766	0.747495	-0.54532	0.323346	0.080672	-1.15015	-1.33098	-1.21839	-0.643683	-1.0247	-0.158731		-0.735398	0.0948165	-0.311523	-0.730074	0.587868	0.319695	-1.3525	1.05862	0.677749	-0.100958	-0.926304	0.992551	0.403897	1.73559	0.0190896	0.187165	-0.995201	-0.354099	-0.712655	-0.480575	-0.246914	-0.598977	-0.158307	-0.408686	0.209046	-0.16595
14.8022		-0.789261	0.0331351	-0.423746	0.88136	-0.294267	0.333549	-0.203782	0.0460355	0.29032	-0.854928	-1.07946	0.786945	-0.625379	0.343934	0.2485	-1.08632	-1.32563	-1.25107	-0.601002	-0.963293	-0.135064		-0.864966	0.213592	-0.214796	-0.728643	0.494267	0.23416	-1.37026	0.978684	0.766609	-0.171275	-0.894822	1.03325	0.374695	1.84189	0.00678877	-0.175646	-0.893328	-0.473391	-0.711627	-0.456554	-0.179457	-0.621493	-0.279514	-0.424582	0.095617	-0.17496
14.8524		-0.791828	-0.00600209	-0.393387	0.972877	-0.307152	0.365065	-0.196089	0.0276903	0.280548	-0.777755	-0.969542	0.934219	-0.819612	0.373121	0.275854	-1.06335	-1.3032	-1.30339	-0.563859	-0.955763	-0.222975		-0.927758	0.357669	-0.218663	-0.76416	0.288176	0.187693	-1.40433	0.923637	0.836935	-0.213132	-0.807958	0.998378	0.357369	1.94432	-0.00213242	-0.384028	-0.742105	-0.323756	-0.749709	-0.399141	-0.143268	-0.548344	-0.401915	-0.520322	-0.01082	-0.14528
14.9026		-0.789296	-0.0541288	-0.380694	1.15726	-0.334267	0.386709	-0.193442	0.02738	0.273699	-0.726628	-0.759234	1.14785	-0.908466	0.333674	0.154787	-1.12944	-1.25342	-1.37646	-0.551609	-1.00473	-0.294191		-0.879776	0.40077	-0.307483	-0.769777	0.140333	0.250771	-1.45249	0.890721	0.825443	-0.24259	-0.711053	0.914487	0.348007	1.99438	-0.00457034	-0.501983	-0.64148	-0.122867	-0.741923	-0.446492	-0.154921	-0.458086	-0.370846	-0.646138	0.033908	-0.13769
14.9528		-0.779309	-0.134232	-0.413304	1.28315	-0.329183	0.308909	-0.19395	0.02757	0.287776	-0.779771	-0.606839	1.29057	-0.775461	0.267681	-0.0218183	-1.2381	-1.19871	-1.41047	-0.556718	-1.06542	-0.115777		-0.773057	0.352172	-0.381135	-0.71896	0.155117	0.346944	-1.48116	0.853217	0.749011	-0.290623	-0.631794	0.885168	0.307324	2.00426	-0.0237748	-0.634715	-0.599455	-0.116099	-0.615604	-0.598416	-0.177162	-0.464631	-0.180452	-0.669156	0.202719	-0.17586
15.003		-0.79623	-0.219335	-0.482098	1.34402	-0.261955	0.183339	-0.195504	0.00344687	0.322001	-0.827463	-0.628427	1.31426	-0.544286	0.265013	-0.100745	-1.30787	-1.19854	-1.35514	-0.561716	-1.09776	0.294779		-0.698651	0.305535	-0.397988	-0.704276	0.292322	0.334907	-1.48379	0.794109	0.677758	-0.367955	-0.569266	0.986656	0.252116	2.00449	-0.0699507	-0.748909	-0.572489	-0.276227	-0.434281	-0.723774	-0.184353	-0.573848	0.0225734	-0.614805	0.319373	-0.23224
15.0531		-0.858101	-0.270431	-0.508041	1.38	-0.176887	0.12575	-0.19361	-0.029444	0.361026	-0.774047	-0.753595	1.27829	-0.392221	0.284071	0.0143572	-1.32349	-1.26509	-1.25221	-0.565286	-1.09854	0.665941		-0.719589	0.309425	-0.396818	-0.789236	0.47286	0.211228	-1.50095	0.696873	0.640622	-0.447813	-0.508916	1.16749	0.235073	1.99977	-0.114719	-0.771985	-0.531363	-0.397947	-0.312345	-0.788683	-0.208755	-0.663896	0.0944068	-0.616945	0.278557	-0.28268
15.1033		-0.919977	-0.285012	-0.429856	1.33446	-0.157763	0.119159	-0.187965	-0.0392574	0.395485	-0.682658	-0.796717	1.23969	-0.342095	0.195307	0.262875	-1.32848	-1.30943	-1.18684	-0.581676	-1.09088	0.827716		-0.825031	0.344342	-0.399234	-0.884638	0.642874	0.131328	-1.56418	0.55386	0.62071	-0.486235	-0.440345	1.29557	0.245786	1.99069	-0.125168	-0.726249	-0.474107	-0.39944	-0.267935	-0.870753	-0.269777	-0.660079	0.0392273	-0.700939	0.172312	-0.32575
15.1535		-0.921412	-0.291595	-0.311044	1.17032	-0.224863	0.0305029	-0.186518	-0.0286599	0.429967	-0.634635	-0.677523	1.22965	-0.302739	-0.00257097	0.480298	-1.33897	-1.23109	-1.17732	-0.619441	-1.1024	0.864119		-0.9475	0.366128	-0.385599	-0.873905	0.752869	0.191614	-1.64025	0.404672	0.625336	-0.472704	-0.374818	1.29001	0.222395	2.0002	-0.105894	-0.65388	-0.423922	-0.391968	-0.240681	-0.947752	-0.319869	-0.644082	-0.0228898	-0.784755	0.153019	-0.35149
15.2037		-0.876093	-0.316453	-0.273164	1.01805	-0.305538	-0.161709	-0.189527	-0.0288999	0.471438	-0.586764	-0.523996	1.26411	-0.227322	-0.161103	0.550476	-1.32539	-1.04884	-1.17655	-0.664454	-1.15316	0.888771		-1.0391	0.332373	-0.374948	-0.781856	0.783952	0.289596	-1.66562	0.317601	0.681249	-0.452257	-0.347066	1.17021	0.170116	2.04024	-0.082284	-0.509062	-0.423999	-0.463017	-0.214818	-0.89535	-0.324793	-0.718799	-0.0233769	-0.835246	0.230224	-0.34302
15.2538		-0.865454	-0.364112	-0.329412	1.02812	-0.333147	-0.305625	-0.183407	-0.048478	0.516239	-0.472963	-0.509434	1.27253	-0.155394	-0.203447	0.467992	-1.28148	-0.881173	-1.1673	-0.689674	-1.24215	0.880203		-1.11257	0.235756	-0.434638	-0.726152	0.793427	0.27896	-1.63868	0.307306	0.763234	-0.478865	-0.380831	0.996878	0.170257	2.07566	-0.0526713	-0.264604	-0.506913	-0.544319	-0.240714	-0.729203	-0.326729	-0.855587	-0.0224827	-0.883565	0.276828	-0.31583
15.304		-0.929228	-0.415972	-0.370653	1.13743	-0.337309	-0.305053	-0.166791	-0.0559331	0.557738	-0.341897	-0.621938	1.112	-0.133774	-0.227353	0.284786	-1.2559	-0.793406	-1.17908	-0.688768	-1.33084	0.810779		-1.19633	0.126747	-0.577105	-0.765562	0.853783	0.181946	-1.63626	0.312265	0.811302	-0.550468	-0.446097	0.811448	0.238289	2.06257	0.00948573	-0.0597108	-0.654949	-0.566597	-0.334196	-0.634989	-0.349377	-0.967788	-0.0902865	-0.940112	0.213577	-0.30533
15.3542		-1.00439	-0.447347	-0.320367	1.15031	-0.391511	-0.26997	-0.162329	-0.0234608	0.603704	-0.286718	-0.683438	0.778351	-0.15287	-0.331648	0.0775573	-1.28986	-0.730968	-1.20556	-0.690364	-1.35672	0.759476		-1.28066	0.0563545	-0.722252	-0.87301	0.95647	0.137233	-1.71113	0.28068	0.828516	-0.612774	-0.474899	0.627297	0.271366	2.01178	0.100979	-0.071094	-0.787602	-0.619384	-0.420541	-0.698127	-0.32206	-1.04918	-0.172737	-1.00356	0.102746	-0.30397
15.4044		-0.999372	-0.454308	-0.225257	1.0202	-0.497261	-0.335308	-0.181578	0.0300348	0.665445	-0.306862	-0.591424	0.509327	-0.172137	-0.461661	-0.0500424	-1.35843	-0.628026	-1.18299	-0.723139	-1.29144	0.7917		-1.32723	0.00498734	-0.802473	-0.994172	1.03872	0.188616	-1.81074	0.239309	0.876053	-0.636524	-0.443687	0.450008	0.198241	1.97581	0.172751	-0.24746	-0.803823	-0.816787	-0.416037	-0.798833	-0.202661	-1.12758	-0.154167	-1.09426	0.039874	-0.26447
15.4546		-0.903731	-0.454965	-0.176286	0.894883	-0.577166	-0.448055	-0.201783	0.0597525	0.724102	-0.3333	-0.425009	0.531462	-0.191679	-0.507611	-0.0347952	-1.4061	-0.512535	-1.07774	-0.778475	-1.18246	0.847665		-1.30615	-0.0794088	-0.845744	-1.06667	1.07653	0.253774	-1.8446	0.239301	0.952962	-0.666459	-0.421607	0.309031	0.0953825	1.97644	0.193363	-0.340551	-0.68108	-1.06189	-0.33939	-0.840769	-0.0973115	-1.15853	-0.0340515	-1.19277	0.031018	-0.18309
15.5047		-0.795556	-0.461644	-0.197443	0.882764	-0.578165	-0.467718	-0.201704	0.0541033	0.736311	-0.348024	-0.279741	0.774141	-0.260347	-0.46683	0.0639709	-1.42193	-0.451634	-0.930837	-0.829059	-1.1082	0.84193		-1.21486	-0.196007	-0.914278	-1.04826	1.08686	0.283229	-1.80398	0.262762	0.973914	-0.759676	-0.492825	0.273204	0.0718023	1.9801	0.199697	-0.230771	-0.536132	-1.1081	-0.28929	-0.891672	-0.128376	-1.10094	0.0462854	-1.22129	0.035269	-0.12108
15.5549		-0.746243	-0.471761	-0.233317	0.914749	-0.527636	-0.391533	-0.194253	0.0480185	0.692037	-0.393962	-0.127055	0.977625	-0.383157	-0.424697	0.132746	-1.44189	-0.448045	-0.785208	-0.869179	-1.09281	0.785094		-1.08954	-0.299325	-1.00696	-0.979764	1.07349	0.312257	-1.75573	0.236327	0.901913	-0.888903	-0.631949	0.405193	0.105723	1.94776	0.245828	-0.0644486	-0.514275	-0.87332	-0.298666	-1.01205	-0.24343	-1.04505	-0.020459	-1.16747	0.073613	-0.11364
15.6051		-0.742467	-0.484584	-0.214582	0.87167	-0.480078	-0.331675	-0.195129	0.0699984	0.639857	-0.478376	0.0867765	1.02397	-0.466899	-0.435772	0.159905	-1.48074	-0.457242	-0.63442	-0.907475	-1.09961	0.731894		-0.9986	-0.359411	-1.06773	-0.943953	1.03867	0.339851	-1.73688	0.137502	0.812753	-0.96694	-0.715999	0.686067	0.0939817	1.87847	0.323618	-0.0138873	-0.592493	-0.559957	-0.267778	-1.11871	-0.291645	-1.10988	-0.171159	-1.1368	0.21038	-0.11565
15.6553		-0.718489	-0.494824	-0.121005	0.741984	-0.461338	-0.322199	-0.187006	0.102653	0.628064	-0.53651	0.313755	1.00822	-0.432103	-0.489934	0.23769	-1.50414	-0.467993	-0.484364	-0.935394	-1.10813	0.682826		-0.982574	-0.365171	-1.07206	-0.925658	1.02306	0.295944	-1.72801	0.0367737	0.778726	-0.976877	-0.686763	1.00816	0.0228608	1.79863	0.385112	-0.0621827	-0.592766	-0.412923	-0.0973018	-1.11967	-0.241861	-1.22874	-0.257529	-1.18994	0.440023	-0.08119
15.7054		-0.65575	-0.475641	0.00958475	0.597771	-0.483788	-0.300888	-0.150542	0.114825	0.64401	-0.515171	0.47499	1.01923	-0.347992	-0.543046	0.402474	-1.4853	-0.494964	-0.396462	-0.938173	-1.1454	0.607873		-0.995389	-0.320345	-1.06861	-0.823819	1.07671	0.183479	-1.72766	0.00602419	0.770294	-0.999642	-0.638716	1.24759	-0.0163714	1.73416	0.426266	-0.123559	-0.447744	-0.467963	0.146391	-1.04628	-0.182929	-1.20024	-0.222076	-1.22595	0.667677	-0.04498
15.7556		-0.611761	-0.418866	0.128766	0.480159	-0.560024	-0.263061	-0.107943	0.109734	0.644895	-0.455168	0.579904	1.01316	-0.354934	-0.532753	0.565372	-1.44966	-0.521546	-0.404977	-0.924835	-1.22124	0.516649		-0.948813	-0.284293	-1.11785	-0.64744	1.20134	0.131661	-1.77194	0.0199718	0.728728	-1.07644	-0.687259	1.32757	0.0245606	1.69849	0.480373	-0.227029	-0.32755	-0.604438	0.279501	-0.965128	-0.144786	-0.987282	-0.135769	-1.14581	0.812992	-0.06706
15.8058		-0.627013	-0.386144	0.222265	0.3718	-0.662497	-0.286942	-0.0963894	0.113082	0.628921	-0.44696	0.684742	0.922437	-0.457809	-0.424557	0.624089	-1.42694	-0.525811	-0.442756	-0.915786	-1.28517	0.445281		-0.818254	-0.341239	-1.1951	-0.5536	1.34553	0.227856	-1.8569	-0.00394618	0.662539	-1.13591	-0.799285	1.23824	0.0838012	1.685	0.534414	-0.431513	-0.391181	-0.74259	0.218864	-0.88116	-0.0720182	-0.809338	-0.0924695	-1.04227	0.882547	-0.13269
15.856		-0.644529	-0.442647	0.291557	0.261494	-0.716467	-0.390485	-0.113557	0.127434	0.631968	-0.507122	0.792315	0.765724	-0.502075	-0.28481	0.572009	-1.38872	-0.543963	-0.420753	-0.918532	-1.28684	0.402522		-0.652714	-0.468468	-1.19925	-0.610146	1.44201	0.387992	-1.91224	-0.0804945	0.610372	-1.12414	-0.842719	1.04701	0.0922313	1.66607	0.535863	-0.6587	-0.534728	-0.881338	0.0789462	-0.798397	0.0320764	-0.846285	-0.123609	-1.07638	0.927798	-0.17361
15.9061		-0.583197	-0.525936	0.312127	0.180105	-0.685713	-0.482587	-0.127416	0.128944	0.66029	-0.547399	0.867947	0.606263	-0.376104	-0.239871	0.481454	-1.28644	-0.631012	-0.347022	-0.943783	-1.24363	0.366612		-0.479104	-0.524624	-1.10055	-0.676335	1.4562	0.474314	-1.89499	-0.130591	0.567037	-1.11175	-0.786788	0.875051	0.0690445	1.61881	0.497971	-0.776245	-0.552564	-0.995838	0.0208374	-0.760518	0.0776778	-0.974168	-0.198218	-1.21929	0.968391	-0.17388
15.9563		-0.475556	-0.473348	0.255107	0.151257	-0.6314	-0.487387	-0.128421	0.105738	0.675058	-0.492087	0.903963	0.476663	-0.150807	-0.318731	0.436748	-1.13652	-0.766745	-0.298645	-1.0129	-1.20986	0.315313		-0.270287	-0.447709	-1.02902	-0.63361	1.42523	0.46835	-1.85928	-0.0977378	0.506267	-1.17591	-0.748839	0.80158	0.074557	1.5524	0.51285	-0.796396	-0.44976	-1.01309	0.0629386	-0.771358	0.0251752	-0.93498	-0.254074	-1.27725	0.972821	-0.18712
16.0065		-0.45177	-0.226818	0.147418	0.139371	-0.630639	-0.427662	-0.132991	0.075302	0.655275	-0.383106	0.907498	0.383177	0.0110013	-0.40538	0.483153	-1.00694	-0.874737	-0.302718	-1.11299	-1.20963	0.241453		-0.0293043	-0.372321	-1.11941	-0.57923	1.42237	0.452562	-1.88551	-0.0374796	0.436458	-1.26097	-0.813311	0.787412	0.116039	1.49016	0.626464	-0.839099	-0.385033	-0.901726	0.0965748	-0.78042	-0.059824	-0.695387	-0.243117	-1.15818	0.899561	-0.24034
16.0567		-0.562549	0.0686115	0.0589648	0.0906367	-0.669501	-0.363202	-0.141424	0.0616899	0.632191	-0.32404	0.869459	0.333501	0.022213	-0.391794	0.586059	-0.920231	-0.933155	-0.316027	-1.18161	-1.23721	0.160627		0.175312	-0.451307	-1.29718	-0.638984	1.45301	0.480996	-1.97197	-0.0469498	0.386642	-1.2709	-0.89925	0.738567	0.147771	1.42952	0.77567	-0.929468	-0.367075	-0.726542	0.0562748	-0.783986	-0.111032	-0.468625	-0.188586	-0.971406	0.74744	-0.28264
16.1069		-0.68844	0.230468	0.0170291	0.011997	-0.682646	-0.326189	-0.13432	0.0701565	0.637018	-0.352236	0.796571	0.321731	-0.0731505	-0.306665	0.648677	-0.83704	-0.992714	-0.309956	-1.17501	-1.29035	0.107259		0.305796	-0.641472	-1.35193	-0.731892	1.44272	0.533867	-2.04182	-0.136615	0.364683	-1.23202	-0.879554	0.635853	0.143669	1.3487	0.885986	-0.982098	-0.259639	-0.589502	-0.00744479	-0.827162	-0.134307	-0.397311	-0.172643	-0.860513	0.562158	-0.26199
16.157		-0.675535	0.237589	-0.0201702	-0.0478384	-0.669062	-0.331249	-0.115943	0.0853112	0.652192	-0.420364	0.740464	0.313379	-0.166921	-0.239238	0.618939	-0.747958	-1.07746	-0.307013	-1.11284	-1.3572	0.094241		0.417418	-0.777223	-1.22851	-0.715965	1.36732	0.557223	-2.03954	-0.225007	0.359688	-1.2421	-0.767073	0.543836	0.127619	1.25437	0.960467	-0.970847	-0.0888752	-0.52859	-0.0445948	-0.87737	-0.155921	-0.391213	-0.228881	-0.859506	0.393903	-0.20779
16.2072		-0.512997	0.200198	-0.0847436	-0.088778	-0.683682	-0.369509	-0.12108	0.0862678	0.648496	-0.481876	0.753203	0.280851	-0.190108	-0.199039	0.558958	-0.705216	-1.14446	-0.327812	-1.02737	-1.39692	0.0813701		0.560394	-0.794524	-1.09384	-0.655093	1.30537	0.508977	-1.98128	-0.249886	0.364275	-1.30954	-0.68553	0.498643	0.131378	1.19	1.03152	-0.958471	-0.0767824	-0.482347	-0.110503	-0.814706	-0.173862	-0.323298	-0.290955	-0.923677	0.26683	-0.18899
16.2574		-0.319351	0.193231	-0.142123	-0.151297	-0.725225	-0.381281	-0.161307	0.0662177	0.638273	-0.530343	0.823016	0.243478	-0.160555	-0.119119	0.560808	-0.724578	-1.16841	-0.356299	-0.925398	-1.3811	0.0219542		0.674715	-0.763578	-1.075	-0.710204	1.29816	0.405888	-1.91764	-0.231541	0.376993	-1.36405	-0.68622	0.46413	0.150155	1.18366	1.09341	-0.951352	-0.284994	-0.356435	-0.267733	-0.58198	-0.188628	-0.233281	-0.297957	-0.996885	0.195898	-0.21642
16.3076		-0.190809	0.201662	-0.149252	-0.21709	-0.724081	-0.314575	-0.197576	0.041232	0.648393	-0.556197	0.870817	0.241819	-0.12164	0.0294286	0.624037	-0.724245	-1.19821	-0.374867	-0.830486	-1.33263	-0.0698079		0.663887	-0.735454	-1.08703	-0.828396	1.26655	0.330985	-1.87829	-0.22046	0.396354	-1.39041	-0.701822	0.419684	0.152144	1.21067	1.13079	-0.885862	-0.4588	-0.122153	-0.428878	-0.252672	-0.227056	-0.245589	-0.294291	-1.03011	0.194726	-0.24187
16.3577		-0.130639	0.197234	-0.128488	-0.223483	-0.656907	-0.218483	-0.193935	0.0331194	0.663154	-0.52759	0.823605	0.275362	-0.0569922	0.183548	0.673643	-0.623611	-1.28497	-0.398523	-0.792226	-1.28321	-0.147681		0.546346	-0.677185	-1.00083	-0.791599	1.1576	0.339293	-1.85742	-0.230783	0.414058	-1.43348	-0.685512	0.41279	0.122514	1.22477	1.1592	-0.79152	-0.369649	0.156849	-0.431583	0.0492442	-0.305811	-0.376092	-0.35345	-1.00763	0.243591	-0.24395
16.4079		-0.104787	0.181915	-0.126492	-0.196816	-0.594802	-0.194558	-0.174235	0.0419393	0.643332	-0.438521	0.709269	0.297312	0.0660619	0.262905	0.668705	-0.458957	-1.40211	-0.454172	-0.815032	-1.22641	-0.213748		0.448066	-0.570745	-0.845188	-0.574542	1.06315	0.374235	-1.8383	-0.245619	0.406032	-1.48798	-0.686048	0.473321	0.0837354	1.21312	1.19274	-0.79699	-0.136459	0.375528	-0.290926	0.207017	-0.404438	-0.503557	-0.453154	-0.963673	0.295081	-0.25396
16.4581		-0.0875689	0.15316	-0.119976	-0.24378	-0.605728	-0.248756	-0.187791	0.0472899	0.589928	-0.336889	0.648508	0.276526	0.180285	0.286943	0.621009	-0.335579	-1.48822	-0.541815	-0.84741	-1.15921	-0.302248		0.441532	-0.488212	-0.734534	-0.408788	1.08051	0.354376	-1.82354	-0.252148	0.349264	-1.48956	-0.744669	0.541796	0.065101	1.20588	1.21781	-0.907474	-0.0297926	0.439816	-0.235728	0.138208	-0.493423	-0.49661	-0.509768	-0.928912	0.340394	-0.28798
16.5083		-0.0448566	0.09263	-0.0335668	-0.362044	-0.666268	-0.282297	-0.229601	0.0392041	0.541781	-0.275266	0.695182	0.236702	0.160673	0.387061	0.521706	-0.292066	-1.54047	-0.625934	-0.872045	-1.12568	-0.395715		0.469543	-0.522881	-0.696738	-0.435166	1.1541	0.308021	-1.83129	-0.246371	0.263999	-1.41602	-0.810104	0.558961	0.0615724	1.23547	1.23646	-0.951612	-0.0761975	0.310395	-0.412886	-0.102007	-0.559907	-0.342292	-0.497801	-0.882492	0.413339	-0.3119
16.5584		0.0633247	0.00889275	0.138695	-0.397462	-0.706073	-0.241813	-0.238807	0.0303005	0.515374	-0.253008	0.728938	0.225643	0.00873432	0.658342	0.339347	-0.278473	-1.61199	-0.653773	-0.924663	-1.15565	-0.440003		0.453301	-0.676418	-0.680287	-0.513675	1.17282	0.314148	-1.85714	-0.226661	0.212109	-1.31526	-0.822739	0.577894	0.0443806	1.2974	1.28894	-0.852327	-0.0630756	0.0690922	-0.672836	-0.294393	-0.590506	-0.185722	-0.450746	-0.802463	0.496184	-0.3012
16.6086		0.238175	-0.0552583	0.298836	-0.272128	-0.700134	-0.184116	-0.18418	0.0291981	0.491663	-0.231553	0.615757	0.265023	-0.1258	1.01433	0.117382	-0.257264	-1.72451	-0.580764	-0.995631	-1.20129	-0.437349		0.401157	-0.851949	-0.659038	-0.476085	1.13747	0.345987	-1.86543	-0.203163	0.228756	-1.23136	-0.819207	0.68855	0.0133863	1.35753	1.39208	-0.768241	0.103257	-0.083766	-0.763317	-0.287164	-0.563099	-0.22202	-0.376924	-0.72516	0.499747	-0.29112
16.6588		0.433936	-0.0838003	0.365838	-0.125421	-0.678439	-0.169589	-0.111134	0.0211118	0.462674	-0.198396	0.43483	0.333405	-0.150774	1.26985	-0.00974374	-0.255912	-1.83079	-0.399916	-1.01454	-1.20512	-0.434359		0.351716	-0.958818	-0.632444	-0.374067	1.11865	0.31214	-1.84374	-0.194614	0.280173	-1.17053	-0.873506	0.855216	0.00718814	1.39928	1.49428	-0.8231	0.254392	-0.00494041	-0.648789	-0.205577	-0.486512	-0.478593	-0.267152	-0.694097	0.392958	-0.33137
16.709		0.602872	-0.118448	0.371324	-0.118451	-0.664433	-0.184394	-0.0818939	-0.00629163	0.449784	-0.19358	0.384971	0.388833	-0.141469	1.37278	0.0290182	-0.301137	-1.87456	-0.161479	-0.976904	-1.19137	-0.425948		0.264667	-0.995733	-0.578168	-0.343033	1.12604	0.236338	-1.83641	-0.200829	0.312684	-1.13923	-0.967736	0.944375	0.0450244	1.4514	1.53503	-0.88222	0.231901	0.209254	-0.510403	-0.265779	-0.422422	-0.74203	-0.170208	-0.674713	0.276157	-0.41493
16.7592		0.71848	-0.192651	0.388589	-0.206872	-0.643617	-0.204573	-0.0990815	-0.0332825	0.467154	-0.263699	0.479108	0.41623	-0.199196	1.44336	0.120798	-0.351749	-1.85464	0.0516905	-0.978915	-1.21471	-0.377439		0.0622229	-1.01673	-0.491032	-0.373792	1.123	0.241366	-1.88065	-0.199465	0.316496	-1.15073	-1.00773	0.922877	0.0915615	1.54856	1.52085	-0.784077	0.145293	0.318453	-0.49481	-0.442056	-0.424212	-0.803741	-0.16977	-0.5794	0.257027	-0.48411
16.8093		0.758861	-0.264772	0.426494	-0.231731	-0.60258	-0.253717	-0.117057	-0.0278688	0.497421	-0.392598	0.524334	0.448571	-0.313817	1.55507	0.100769	-0.33733	-1.80795	0.191384	-1.06387	-1.25615	-0.333578		-0.226061	-1.04999	-0.427646	-0.378638	1.10564	0.342932	-1.93846	-0.18342	0.314415	-1.1834	-0.968591	0.9121	0.107402	1.66867	1.50163	-0.609722	0.227858	0.23008	-0.600257	-0.520325	-0.466392	-0.732812	-0.278761	-0.377107	0.317309	-0.50089
16.8595		0.711884	-0.268545	0.457656	-0.148337	-0.574057	-0.345978	-0.107574	0.00762333	0.513986	-0.49337	0.425752	0.510778	-0.407466	1.61834	-0.01498	-0.252334	-1.74843	0.284368	-1.13858	-1.24865	-0.376769		-0.447826	-1.09039	-0.439217	-0.380846	1.08588	0.411141	-1.94991	-0.175452	0.314286	-1.18247	-0.940435	1.00663	0.104136	1.74397	1.49377	-0.501869	0.498688	0.0844379	-0.768409	-0.436231	-0.481098	-0.762146	-0.422628	-0.14624	0.36476	-0.48495
16.9097		0.603985	-0.213184	0.494153	-0.0341156	-0.605995	-0.432055	-0.0816669	0.0348418	0.508329	-0.495651	0.305819	0.557476	-0.415259	1.55747	-0.0500122	-0.177888	-1.65425	0.391932	-1.1207	-1.17663	-0.471978		-0.488092	-1.14276	-0.487417	-0.472575	1.05826	0.371389	-1.92739	-0.187106	0.307014	-1.1169	-0.992258	1.14455	0.113368	1.74581	1.46971	-0.399757	0.71202	0.0278702	-0.941441	-0.334379	-0.45654	-0.94105	-0.528746	-0.0144	0.353709	-0.46679
16.9599		0.482359	-0.170353	0.5521	0.0632122	-0.675733	-0.455705	-0.0579997	0.0293494	0.489457	-0.440078	0.27201	0.529843	-0.313287	1.45803	0.0595489	-0.189698	-1.51731	0.539242	-1.06832	-1.08013	-0.495267		-0.385472	-1.21257	-0.481517	-0.629918	1.04019	0.304175	-1.9244	-0.190567	0.296531	-1.00157	-1.06646	1.21925	0.129053	1.72226	1.41255	-0.203542	0.665329	0.0287813	-1.0343	-0.304659	-0.444042	-1.08989	-0.574695	-0.0472964	0.294945	-0.4169
17.01		0.357967	-0.165892	0.586795	0.152022	-0.680399	-0.432493	-0.0418134	0.0105154	0.470996	-0.441235	0.272481	0.461359	-0.167946	1.41983	0.150582	-0.255136	-1.37712	0.70306	-1.0665	-0.991371	-0.436077		-0.258846	-1.26994	-0.382929	-0.710473	1.0744	0.29162	-1.93308	-0.159693	0.29766	-0.862123	-1.0836	1.23323	0.123631	1.72651	1.34046	-0.0196514	0.441744	-0.0316221	-0.987338	-0.285726	-0.469364	-1.10385	-0.560066	-0.183666	0.209875	-0.26918
17.0602		0.207567	-0.155656	0.555414	0.215884	-0.561543	-0.432646	-0.0337307	0.0111715	0.463782	-0.538894	0.263652	0.433745	-0.12776	1.3908	0.0683534	-0.258721	-1.28477	0.85217	-1.07833	-0.92785	-0.42057		-0.175965	-1.28798	-0.244791	-0.631912	1.14764	0.287043	-1.90267	-0.119384	0.306198	-0.713207	-1.08874	1.2631	0.0995386	1.74181	1.27745	0.0315269	0.265851	-0.193106	-0.872367	-0.249459	-0.500544	-1.09394	-0.50187	-0.285798	0.135782	-0.03956
17.1104		0.0471642	-0.115816	0.511115	0.227769	-0.402474	-0.497074	-0.0339944	0.0372454	0.469917	-0.644049	0.325615	0.433643	-0.245625	1.2906	-0.101696	-0.146524	-1.24623	0.967177	-1.0288	-0.914529	-0.497414		-0.13533	-1.30368	-0.162868	-0.465043	1.17974	0.213752	-1.85135	-0.119764	0.296431	-0.572014	-1.17282	1.32848	0.0801409	1.71569	1.23108	0.0707056	0.197392	-0.391062	-0.837884	-0.270516	-0.512942	-1.16841	-0.449205	-0.284158	0.123206	0.139147
17.1606		-0.0438065	-0.079375	0.544687	0.215678	-0.323933	-0.588886	-0.0351722	0.0729905	0.478412	-0.671074	0.498443	0.376397	-0.36836	1.19013	-0.158469	-0.00442227	-1.22284	1.03174	-0.961773	-0.958768	-0.554998		-0.124915	-1.36946	-0.19069	-0.347905	1.13277	0.108043	-1.85697	-0.167015	0.25393	-0.456534	-1.27878	1.37099	0.0669833	1.64493	1.19957	0.230676	0.101476	-0.515349	-0.916154	-0.36559	-0.524475	-1.26031	-0.423786	-0.270757	0.175287	0.169629
17.2108		-0.00686704	-0.0657049	0.659747	0.215225	-0.310089	-0.626918	-0.0279051	0.108323	0.47307	-0.652288	0.664509	0.283599	-0.343225	1.20123	-0.0681514	0.0510997	-1.18213	1.04334	-0.971892	-1.02983	-0.510502		-0.138088	-1.45675	-0.281059	-0.352992	1.07096	0.0770362	-1.92334	-0.212063	0.197302	-0.366093	-1.24798	1.33652	0.0483546	1.58054	1.17336	0.355517	-0.0893351	-0.473867	-0.979991	-0.438761	-0.55026	-1.26031	-0.3529	-0.407289	0.232921	0.125981
17.2609		0.11752	-0.0552767	0.787891	0.195637	-0.248834	-0.5715	-0.0152629	0.140567	0.450159	-0.65128	0.713909	0.288497	-0.245732	1.26444	0.012604	0.0269317	-1.12583	1.0283	-1.02301	-1.08931	-0.435099		-0.152766	-1.48925	-0.32655	-0.425985	1.08007	0.148183	-1.95884	-0.2152	0.163288	-0.292805	-1.08669	1.22682	0.0335876	1.55475	1.13137	0.242319	-0.241537	-0.279304	-0.932144	-0.440272	-0.575637	-1.17443	-0.150017	-0.726068	0.255494	0.140974
17.3111		0.233693	-0.0570699	0.895764	0.123845	-0.135285	-0.476415	-0.0103075	0.163838	0.424604	-0.633086	0.700348	0.423128	-0.233722	1.22084	-0.0320901	0.0330808	-1.06994	1.01041	-0.98309	-1.10348	-0.41356		-0.140847	-1.46595	-0.287115	-0.435342	1.16187	0.228622	-1.9197	-0.19766	0.175704	-0.24643	-1.01307	1.08936	0.038924	1.54541	1.06311	0.0121571	-0.226999	-0.0748985	-0.845033	-0.438699	-0.589335	-1.06679	0.140593	-1.06582	0.270607	0.202024
17.3613		0.289637	-0.112199	0.995756	0.0485336	-0.0870769	-0.431878	-0.0213255	0.179407	0.41271	-0.524589	0.723145	0.55394	-0.285586	1.05749	-0.151757	0.127247	-1.02141	0.973983	-0.834474	-1.02851	-0.408331		-0.0939823	-1.46178	-0.241438	-0.310572	1.22782	0.217943	-1.87512	-0.212857	0.223703	-0.232605	-1.15276	0.987196	0.0555518	1.52074	0.991414	-0.089762	-0.142648	0.0030621	-0.845554	-0.490404	-0.599956	-0.967462	0.376486	-1.23907	0.317287	0.185806
17.4115		0.294689	-0.198576	1.0834	0.0205056	-0.126216	-0.45438	-0.0462891	0.202262	0.411031	-0.356447	0.765437	0.595057	-0.29104	0.924043	-0.244598	0.261384	-0.981888	0.897449	-0.713214	-0.858556	-0.353457		-0.0263094	-1.4995	-0.264149	-0.132174	1.19948	0.123033	-1.88292	-0.280259	0.261075	-0.216866	-1.3422	0.953312	0.0667135	1.48712	0.945058	-0.116564	-0.190182	-0.0284788	-0.930617	-0.558359	-0.61084	-0.906532	0.499252	-1.23072	0.388186	0.072044
17.4616		0.264701	-0.227221	1.14171	-0.0127638	-0.10884	-0.476721	-0.0749985	0.233063	0.401724	-0.231984	0.758859	0.629214	-0.29128	0.915844	-0.289258	0.390055	-0.955298	0.80891	-0.714533	-0.688438	-0.278884		0.0293504	-1.50915	-0.302572	-0.0408646	1.12143	0.0364892	-1.896	-0.366271	0.238137	-0.157022	-1.35906	0.95277	0.0781958	1.47561	0.914917	-0.299643	-0.395277	-0.0499907	-0.983121	-0.601639	-0.61368	-0.928739	0.584078	-1.18586	0.451276	-0.02172
17.5118		0.207358	-0.178923	1.17572	-0.121836	0.0509806	-0.46131	-0.0923672	0.242492	0.380309	-0.184984	0.719002	0.722724	-0.386559	0.971613	-0.325459	0.550392	-0.939347	0.756238	-0.768677	-0.631137	-0.248412		0.0322497	-1.43602	-0.254856	-0.0722042	1.13041	0.0167523	-1.85961	-0.422469	0.154704	-0.0694603	-1.22167	0.918032	0.101676	1.49795	0.86953	-0.605875	-0.593529	0.021535	-0.939085	-0.641432	-0.607387	-1.0107	0.691729	-1.22263	0.48277	-0.02552
17.562		0.155853	-0.149495	1.18041	-0.255369	0.236609	-0.46636	-0.0916414	0.215002	0.365251	-0.172127	0.709966	0.773699	-0.494477	0.989705	-0.380614	0.801867	-0.917194	0.72945	-0.74765	-0.662297	-0.253031		-0.0163939	-1.3179	-0.133389	-0.140857	1.26489	0.0336477	-1.8175	-0.422273	0.0737984	-0.0181757	-1.11412	0.830174	0.129659	1.53257	0.806659	-0.755089	-0.679856	0.198996	-0.853626	-0.696522	-0.595133	-1.05489	0.770176	-1.31304	0.46099	-0.00095
17.6122		0.15705	-0.20191	1.12462	-0.299676	0.308473	-0.559207	-0.0874021	0.186332	0.371375	-0.167465	0.739114	0.679541	-0.457984	0.939726	-0.457612	1.14281	-0.86736	0.667152	-0.614769	-0.653342	-0.249041		-0.0436541	-1.23161	-0.0540222	-0.161894	1.3798	0.0414142	-1.83417	-0.367971	0.0570969	-0.0361212	-1.11115	0.724001	0.152137	1.54943	0.751657	-0.655168	-0.716985	0.423441	-0.793507	-0.737789	-0.57164	-1.01735	0.743704	-1.3499	0.375304	-0.01599
17.6623		0.215444	-0.267134	1.03076	-0.23706	0.299167	-0.70364	-0.0994485	0.196562	0.385279	-0.153587	0.784223	0.535773	-0.332666	0.845532	-0.543982	1.51194	-0.784747	0.53953	-0.43509	-0.575487	-0.240374		0.00687224	-1.21047	-0.0776309	-0.112379	1.34436	0.0444869	-1.87088	-0.292339	0.093429	-0.0968032	-1.13319	0.612584	0.171863	1.53848	0.709975	-0.523267	-0.772185	0.528272	-0.733139	-0.749088	-0.537868	-0.971227	0.634968	-1.28548	0.258772	-0.05574
17.7125		0.296575	-0.263833	1.00228	-0.133823	0.321948	-0.781602	-0.122821	0.227093	0.380919	-0.0676166	0.879359	0.511706	-0.314873	0.735002	-0.602289	1.82528	-0.694062	0.376842	-0.300232	-0.546372	-0.251703		0.0675061	-1.22408	-0.153947	-0.00402327	1.23362	0.0512362	-1.83568	-0.252197	0.123583	-0.16088	-1.1128	0.475435	0.182999	1.51359	0.662696	-0.528873	-0.801318	0.36159	-0.606115	-0.767974	-0.512707	-1.00743	0.553945	-1.18733	0.167679	-0.08608
17.7627		0.388831	-0.22998	1.08877	-0.0131062	0.400279	-0.716873	-0.135813	0.234083	0.353155	0.113514	1.07547	0.604048	-0.4255	0.623449	-0.595137	1.99983	-0.637782	0.219921	-0.269302	-0.631701	-0.270084		0.0281815	-1.2084	-0.217628	0.120219	1.18858	0.0280923	-1.72636	-0.281194	0.129074	-0.207778	-1.05977	0.338426	0.168407	1.49496	0.608664	-0.556722	-0.75924	0.0485789	-0.437618	-0.822104	-0.505793	-1.11954	0.579366	-1.16985	0.114628	-0.10174
17.8129		0.506487	-0.246533	1.1883	0.138602	0.498622	-0.553059	-0.138798	0.224557	0.321024	0.273377	1.32449	0.665927	-0.501766	0.505679	-0.541943	1.99775	-0.636701	0.0914338	-0.335236	-0.727395	-0.271243		-0.0730804	-1.12925	-0.253393	0.19681	1.18747	-0.0334412	-1.63314	-0.337886	0.14846	-0.219343	-0.993046	0.279321	0.138293	1.49239	0.569774	-0.446861	-0.693564	-0.051057	-0.357339	-0.873763	-0.492964	-1.20422	0.663465	-1.26705	0.065216	-0.0852
17.8631		0.629055	-0.298806	1.17775	0.268815	0.618106	-0.41304	-0.155954	0.238074	0.301292	0.276958	1.48823	0.63389	-0.471542	0.371013	-0.50882	1.86549	-0.661696	0.00997317	-0.430065	-0.718768	-0.26016		-0.0835761	-1.03976	-0.265415	0.22738	1.13304	-0.0639994	-1.60845	-0.338239	0.198118	-0.174726	-0.922424	0.303341	0.133015	1.5049	0.549422	-0.310874	-0.65896	0.206313	-0.436055	-0.880159	-0.441146	-1.15752	0.672453	-1.37716	0.008774	-0.01365
17.9132		0.705002	-0.31483	1.08415	0.29555	0.745198	-0.386039	-0.191043	0.265365	0.294645	0.160966	1.49384	0.579858	-0.41597	0.256725	-0.525706	1.68238	-0.664362	-0.0189083	-0.493774	-0.655149	-0.242028		0.0033031	-1.03491	-0.26295	0.297723	1.07214	-0.0117372	-1.61658	-0.255409	0.231004	-0.0735528	-0.868948	0.289242	0.164064	1.52835	0.522161	-0.401149	-0.655568	0.524972	-0.548962	-0.882364	-0.352306	-0.986862	0.547656	-1.36727	-0.0213	0.066537
17.9634		0.72704	-0.300384	1.02856	0.247425	0.789258	-0.450181	-0.211701	0.255479	0.298123	0.0740134	1.4235	0.557357	-0.389715	0.252416	-0.554268	1.46844	-0.640042	-0.0245289	-0.532634	-0.661303	-0.199418		-0.00478566	-1.11937	-0.281143	0.43133	1.11619	0.0660451	-1.62066	-0.151509	0.204628	0.0649273	-0.816771	0.133165	0.190156	1.55507	0.473662	-0.692048	-0.698788	0.571958	-0.488886	-0.964621	-0.270107	-0.830404	0.391691	-1.22704	-0.01336	0.061082
18.0136		0.737237	-0.331711	1.05021	0.248514	0.687022	-0.513062	-0.192944	0.206346	0.31295	0.0590514	1.39589	0.534621	-0.384457	0.392385	-0.546975	1.20001	-0.635201	-0.0422201	-0.580313	-0.739293	-0.135736		-0.192565	-1.18281	-0.348128	0.514272	1.21013	0.0921512	-1.6431	-0.097526	0.150252	0.235575	-0.691604	-0.105309	0.176288	1.56987	0.424017	-0.83207	-0.808056	0.415942	-0.231351	-1.10595	-0.240059	-0.817089	0.334562	-1.05817	-0.00605	-0.0428
18.0638		0.751236	-0.421538	1.09373	0.343511	0.515636	-0.522665	-0.153848	0.179194	0.331731	0.0310516	1.40065	0.495013	-0.434868	0.561452	-0.496923	0.909497	-0.682606	-0.072235	-0.632123	-0.775247	-0.0922051		-0.352386	-1.15291	-0.435199	0.470476	1.20408	0.0814344	-1.70535	-0.10561	0.135167	0.45547	-0.473289	-0.276141	0.139416	1.5589	0.40402	-0.620586	-0.887995	0.348117	-0.00189764	-1.1418	-0.262148	-0.911066	0.360977	-0.916671	-0.02201	-0.14425
18.1139		0.752617	-0.484706	1.13415	0.438131	0.407488	-0.503473	-0.133532	0.206254	0.332776	-0.0470651	1.34012	0.489917	-0.561377	0.58135	-0.428343	0.685088	-0.75845	-0.103773	-0.665457	-0.725441	-0.0861643		-0.26886	-1.09968	-0.499763	0.402047	1.12088	0.0652472	-1.76409	-0.157975	0.177254	0.722967	-0.276525	-0.321128	0.109704	1.5257	0.426023	-0.30245	-0.798945	0.428651	-0.0220721	-0.955532	-0.29032	-0.965863	0.36404	-0.756649	-0.02563	-0.16447
18.1641		0.762365	-0.459288	1.2007	0.438334	0.390611	-0.48641	-0.143676	0.243785	0.303136	-0.103241	1.21804	0.546974	-0.65079	0.410093	-0.378597	0.553151	-0.822477	-0.151776	-0.690598	-0.684328	-0.0826268		-0.0493309	-1.1184	-0.551511	0.421825	1.13343	-0.00651405	-1.76193	-0.248453	0.230546	0.98271	-0.224167	-0.307099	0.0834378	1.49032	0.478059	-0.1796	-0.593887	0.471453	-0.248335	-0.683554	-0.28852	-0.921934	0.317441	-0.54404	0.012991	-0.14837
18.2143		0.815803	-0.393785	1.28869	0.358942	0.389229	-0.469271	-0.159424	0.242984	0.261095	-0.0853478	1.1558	0.596221	-0.595036	0.197914	-0.381512	0.440225	-0.874734	-0.21925	-0.724295	-0.735489	-0.062515		0.0286333	-1.17934	-0.600311	0.462157	1.2726	-0.155931	-1.71708	-0.357844	0.244173	1.15198	-0.281641	-0.299193	0.0458045	1.4696	0.531218	-0.150482	-0.480272	0.384717	-0.441988	-0.608792	-0.268486	-0.854086	0.265536	-0.324406	0.056911	-0.1755
18.2645		0.86095	-0.376383	1.34867	0.263887	0.355403	-0.46634	-0.152424	0.220994	0.238586	-0.0451326	1.18502	0.543344	-0.49937	0.106698	-0.429025	0.283473	-0.946376	-0.256184	-0.748807	-0.81682	-0.0664045		-0.0954693	-1.18764	-0.579143	0.407943	1.3588	-0.26187	-1.70547	-0.43207	0.210488	1.18828	-0.313112	-0.283232	0.00920353	1.46426	0.557021	0.044487	-0.483604	0.273008	-0.463378	-0.807509	-0.247005	-0.828812	0.186302	-0.147558	0.053708	-0.21487
18.3146		0.797983	-0.42284	1.36773	0.179795	0.335605	-0.519488	-0.122362	0.229143	0.241855	-0.0623749	1.16474	0.394509	-0.540897	0.119503	-0.469789	0.111699	-1.04584	-0.223704	-0.757241	-0.802834	-0.126462		-0.242339	-1.14035	-0.432602	0.306925	1.27252	-0.218175	-1.75144	-0.434111	0.162216	1.12496	-0.274951	-0.228962	-0.00550502	1.46498	0.552136	0.295895	-0.38095	0.235256	-0.397706	-1.02415	-0.198115	-0.824861	0.0209966	-0.0202569	0.013435	-0.14643
18.3648		0.652204	-0.479527	1.38417	0.105524	0.408211	-0.617468	-0.092529	0.279306	0.246078	-0.153075	0.996695	0.263663	-0.672404	0.0866377	-0.481709	-0.0175828	-1.13279	-0.175813	-0.796036	-0.684116	-0.19914		-0.298643	-1.1137	-0.261045	0.272068	1.1327	-0.124856	-1.78538	-0.395614	0.138335	1.03687	-0.258361	-0.171716	-0.0030247	1.46258	0.540372	0.263756	-0.0654269	0.270617	-0.383712	-0.998886	-0.105132	-0.802635	-0.176868	0.0374382	-0.01521	0.066869
18.415		0.580008	-0.511105	1.41966	0.0426624	0.585287	-0.675858	-0.0772449	0.332546	0.231426	-0.280091	0.803847	0.242488	-0.702129	-0.0733766	-0.501868	-0.100475	-1.14331	-0.204592	-0.890953	-0.581475	-0.213221		-0.326927	-1.11634	-0.237855	0.276019	1.11586	-0.13757	-1.72951	-0.376713	0.146265	0.98081	-0.345821	-0.187895	0.00311583	1.4519	0.539245	-0.0338457	0.25508	0.366554	-0.425959	-0.808548	-0.0349723	-0.751447	-0.280979	-0.0129465	-0.01663	0.295187
18.4652		0.64113	-0.534908	1.46224	-0.0140251	0.780378	-0.648451	-0.0633843	0.350013	0.20719	-0.406097	0.762777	0.290034	-0.627866	-0.298342	-0.541336	-0.165708	-1.04133	-0.317986	-0.97525	-0.576353	-0.155938		-0.382868	-1.06688	-0.36839	0.223306	1.20059	-0.203644	-1.59005	-0.390113	0.153812	0.975529	-0.510279	-0.299055	0.02305	1.43558	0.536149	-0.217989	0.353797	0.496667	-0.441142	-0.719898	-0.0743936	-0.663147	-0.282498	-0.141862	-0.00489	0.375444
18.5154		0.690091	-0.574252	1.51252	-0.0648632	0.878995	-0.597659	-0.0324264	0.333731	0.193164	-0.502615	0.833671	0.28714	-0.628882	-0.491645	-0.540137	-0.220363	-0.858358	-0.443543	-0.97455	-0.612425	-0.0734551		-0.42191	-0.926	-0.469911	0.139259	1.21302	-0.161384	-1.44413	-0.400857	0.133142	1.01576	-0.672506	-0.432757	0.075424	1.42419	0.512365	-0.1412	0.277976	0.540745	-0.412519	-0.785151	-0.191659	-0.550317	-0.293958	-0.249542	0.018797	0.292955
18.5655		0.589665	-0.621912	1.58835	-0.0737582	0.85267	-0.607988	0.00676548	0.316176	0.192489	-0.537787	0.807584	0.19015	-0.73068	-0.608731	-0.476555	-0.258041	-0.680829	-0.544152	-0.922634	-0.606673	-0.00997155		-0.409923	-0.756787	-0.428071	0.113913	1.09195	-0.0465622	-1.36764	-0.389637	0.105722	1.07359	-0.79443	-0.494393	0.152773	1.42127	0.478935	-0.045863	0.204849	0.380503	-0.395597	-0.806564	-0.257882	-0.486514	-0.358617	-0.283444	0.046558	0.173972
18.6157		0.423924	-0.657692	1.6875	-0.0105409	0.783105	-0.685613	0.0233925	0.321088	0.193351	-0.505464	0.603843	0.0788359	-0.751312	-0.624441	-0.444744	-0.287123	-0.581619	-0.655431	-0.900421	-0.574504	0.0216797		-0.369622	-0.632462	-0.329948	0.136521	0.969489	-0.0581999	-1.39447	-0.377302	0.109122	1.09785	-0.889443	-0.459484	0.228987	1.40717	0.468705	-0.0756704	0.174187	0.087545	-0.401538	-0.690295	-0.228286	-0.536725	-0.400584	-0.28113	0.035687	0.119756
18.6659		0.370966	-0.670009	1.79199	0.0666554	0.750932	-0.779435	0.0031586	0.343819	0.187208	-0.467012	0.380603	0.0410903	-0.621405	-0.523145	-0.526853	-0.318112	-0.564617	-0.803232	-0.896404	-0.567658	0.0261591		-0.296847	-0.56111	-0.280107	0.144333	0.95042	-0.222008	-1.50482	-0.384299	0.123904	1.05535	-0.982812	-0.370148	0.291011	1.35275	0.49658	-0.0699562	0.115857	-0.133677	-0.384648	-0.589533	-0.198533	-0.645313	-0.377931	-0.281857	-0.03277	0.119921
18.7161		0.437209	-0.651061	1.89633	0.0426996	0.738904	-0.843093	-0.0332769	0.367786	0.175854	-0.509333	0.318638	0.0621703	-0.503509	-0.367923	-0.650351	-0.348916	-0.588223	-0.950899	-0.83485	-0.558357	0.00719588		-0.164769	-0.525655	-0.237933	0.161756	0.952972	-0.322243	-1.6232	-0.398681	0.0890034	0.975844	-1.0902	-0.25691	0.340783	1.25668	0.543237	0.0346797	0.0328253	-0.207439	-0.350393	-0.630359	-0.234693	-0.677512	-0.34809	-0.285676	-0.10098	0.12721
18.7662		0.468223	-0.597348	1.99269	-0.111262	0.695492	-0.847808	-0.0543861	0.383742	0.166837	-0.632355	0.406489	0.0563222	-0.528759	-0.286163	-0.67873	-0.381494	-0.628371	-1.04945	-0.721747	-0.48769	-0.0424807		-0.0244995	-0.531046	-0.148815	0.250825	0.879847	-0.219523	-1.66675	-0.398213	0.00174939	0.917472	-1.21264	-0.106322	0.378294	1.15503	0.576351	0.0241742	0.0287498	-0.250227	-0.369363	-0.713285	-0.259628	-0.592796	-0.357025	-0.314062	-0.11292	0.135043
18.8164		0.398509	-0.526556	2.054	-0.270798	0.653758	-0.796602	-0.0502395	0.38449	0.167936	-0.73013	0.504393	-0.0246904	-0.645064	-0.319427	-0.597933	-0.421721	-0.68899	-1.09795	-0.647796	-0.379045	-0.133209		0.0216613	-0.582819	-0.105634	0.396032	0.82239	-0.043124	-1.63177	-0.383855	-0.0626469	0.886711	-1.33203	0.0917428	0.406762	1.0809	0.575836	-0.179904	0.193921	-0.346101	-0.451977	-0.701135	-0.194579	-0.51576	-0.378742	-0.409055	-0.10684	0.153747
18.8666		0.337103	-0.475685	2.07164	-0.2672	0.696608	-0.749718	-0.0375761	0.359861	0.181847	-0.729388	0.539286	-0.141167	-0.79278	-0.355272	-0.50946	-0.451598	-0.758041	-1.13497	-0.643698	-0.297721	-0.246427		-0.0388174	-0.66354	-0.225711	0.555118	0.917343	0.0147063	-1.59843	-0.374794	-0.0623847	0.84383	-1.42332	0.2996	0.443382	1.02594	0.541974	-0.305534	0.500818	-0.407892	-0.505804	-0.633886	-0.114262	-0.596634	-0.383674	-0.546607	-0.14309	0.174679
18.9168		0.374015	-0.473529	2.07626	-0.0592358	0.809432	-0.770449	-0.0397279	0.315905	0.202368	-0.691316	0.544383	-0.214938	-0.997161	-0.274757	-0.473101	-0.445839	-0.795845	-1.19291	-0.639078	-0.245911	-0.325333		-0.121021	-0.745172	-0.441521	0.740169	1.08302	-0.0496679	-1.61825	-0.380747	-0.0534258	0.797605	-1.4802	0.445513	0.499538	0.961576	0.493202	-0.172249	0.773286	-0.338974	-0.468584	-0.625845	-0.137535	-0.826135	-0.373505	-0.64316	-0.18006	0.189298
18.967		0.428482	-0.523271	2.08191	0.209583	0.868748	-0.82706	-0.0638955	0.284108	0.216756	-0.712152	0.54931	-0.218947	-1.19192	-0.116332	-0.454575	-0.432102	-0.783961	-1.27158	-0.582541	-0.207231	-0.329498		-0.183189	-0.794954	-0.562862	0.943543	1.11465	-0.105512	-1.64143	-0.393839	-0.0940133	0.824863	-1.51502	0.472455	0.558754	0.890172	0.454145	-0.0322588	0.801429	-0.217066	-0.400033	-0.671614	-0.229694	-1.03334	-0.347294	-0.662966	-0.12829	0.195397
19.0171		0.363663	-0.605289	2.05591	0.343789	0.809718	-0.824517	-0.0932486	0.290176	0.213619	-0.781331	0.535527	-0.197888	-1.17436	-0.0284775	-0.410724	-0.480808	-0.755873	-1.34752	-0.508117	-0.235072	-0.287863		-0.272685	-0.782957	-0.51606	1.07679	1.00899	-0.101778	-1.59939	-0.403874	-0.14818	0.947626	-1.53002	0.385538	0.598105	0.842556	0.430457	-0.189007	0.571712	-0.200028	-0.381496	-0.683544	-0.255366	-1.08033	-0.31472	-0.629314	-0.00249	0.168358
19.0673		0.181029	-0.680426	1.99402	0.307928	0.713285	-0.757599	-0.101428	0.323343	0.193082	-0.822246	0.497202	-0.176863	-0.878235	-0.0928546	-0.344933	-0.604581	-0.754315	-1.40601	-0.456764	-0.363194	-0.261941		-0.418451	-0.723511	-0.406771	1.08641	0.962064	-0.114281	-1.5146	-0.411305	-0.152937	1.04612	-1.51016	0.258355	0.621933	0.819373	0.397213	-0.51877	0.315283	-0.301622	-0.401508	-0.646552	-0.198679	-1.02186	-0.320689	-0.547895	0.09213	0.081088
19.1175		0.0252969	-0.705346	1.97231	0.267927	0.672875	-0.742793	-0.0789745	0.352419	0.172992	-0.821673	0.453961	-0.095176	-0.533214	-0.249441	-0.283006	-0.719235	-0.77855	-1.45964	-0.415315	-0.486505	-0.270532		-0.56925	-0.688528	-0.368408	1.04165	1.03434	-0.196338	-1.46809	-0.42489	-0.131255	0.974316	-1.45304	0.165342	0.648636	0.776207	0.331283	-0.670907	0.226132	-0.378313	-0.411422	-0.626367	-0.185546	-1.02751	-0.372283	-0.438841	0.11236	-0.03394
19.1677		0.0223471	-0.67696	2.0525	0.369984	0.662916	-0.846028	-0.043568	0.360262	0.175222	-0.822725	0.391889	0.0906293	-0.416408	-0.377626	-0.248316	-0.745657	-0.803325	-1.52559	-0.368809	-0.485965	-0.294105		-0.662057	-0.739135	-0.436608	1.0168	1.0604	-0.271522	-1.48659	-0.44782	-0.154368	0.747226	-1.38159	0.103583	0.67465	0.692611	0.253151	-0.577878	0.23152	-0.336557	-0.423921	-0.662798	-0.281244	-1.15929	-0.376916	-0.405927	0.105504	-0.10335
19.2178		0.162887	-0.652237	2.17436	0.53939	0.625231	-0.961715	-0.0205407	0.348643	0.195686	-0.82979	0.279683	0.282068	-0.549553	-0.410612	-0.256294	-0.704206	-0.833163	-1.59468	-0.345851	-0.427809	-0.336393		-0.683408	-0.864495	-0.54544	0.979636	0.954368	-0.224413	-1.5253	-0.464209	-0.219817	0.53535	-1.31365	0.0238172	0.681073	0.614787	0.207303	-0.472089	0.169755	-0.249558	-0.472974	-0.732597	-0.401721	-1.28442	-0.245894	-0.511655	0.09191	-0.11103
19.268		0.337339	-0.684641	2.22839	0.600392	0.615688	-0.948742	-0.0178441	0.323868	0.202364	-0.817616	0.159674	0.341318	-0.742194	-0.379989	-0.305318	-0.658614	-0.894145	-1.64586	-0.369981	-0.471976	-0.420011		-0.645329	-1.01067	-0.578354	0.883128	0.869819	-0.0693625	-1.54802	-0.448598	-0.254204	0.463422	-1.24555	-0.0618896	0.666984	0.586242	0.195374	-0.49221	0.0641586	-0.233693	-0.532313	-0.798209	-0.459757	-1.23308	-0.0248903	-0.624842	0.035902	-0.11744
19.3182		0.449526	-0.749508	2.22127	0.532351	0.745827	-0.833712	-0.0248814	0.293505	0.180407	-0.80534	0.120258	0.291496	-0.837995	-0.371243	-0.383034	-0.610859	-0.972911	-1.68276	-0.412376	-0.613158	-0.52043		-0.558105	-1.12909	-0.459706	0.766958	0.933139	0.0421347	-1.56207	-0.4024	-0.232263	0.487997	-1.1836	-0.0738975	0.64671	0.573551	0.165938	-0.546862	0.0385214	-0.293287	-0.56236	-0.843141	-0.480077	-1.00665	0.171008	-0.588826	-0.05128	-0.16196
19.3684		0.48606	-0.783083	2.27508	0.450653	0.997875	-0.774547	-0.0295674	0.266842	0.159096	-0.829651	0.141553	0.269976	-0.817605	-0.431362	-0.486698	-0.523165	-1.01564	-1.72253	-0.432776	-0.691242	-0.566618		-0.442686	-1.18068	-0.247134	0.674236	1.01953	0.0081955	-1.57517	-0.368272	-0.213959	0.502923	-1.15495	0.0137035	0.625915	0.520882	0.0903532	-0.53859	0.0696855	-0.354442	-0.591902	-0.870738	-0.514153	-0.778098	0.314287	-0.495011	-0.08836	-0.20698
19.4185		0.48916	-0.788059	2.43934	0.374558	1.20744	-0.838379	-0.030002	0.245167	0.166902	-0.860899	0.0856774	0.305199	-0.726128	-0.523439	-0.61364	-0.421622	-1.01021	-1.75206	-0.43816	-0.65295	-0.523825		-0.323438	-1.15543	-0.0807244	0.563854	0.964787	-0.0929093	-1.5751	-0.380784	-0.250027	0.494881	-1.1549	0.118842	0.611641	0.447948	0.0114458	-0.493191	0.0301472	-0.401585	-0.657437	-0.897415	-0.539408	-0.67411	0.452231	-0.549338	-0.04035	-0.20635
19.4687		0.490173	-0.829069	2.59077	0.219393	1.24981	-0.925759	-0.0349988	0.218496	0.183224	-0.824343	-0.0909082	0.304557	-0.603972	-0.587318	-0.735691	-0.392302	-1.02504	-1.7361	-0.466254	-0.624751	-0.428664		-0.197301	-1.1131	-0.0062982	0.407374	0.845482	-0.117491	-1.56245	-0.410596	-0.313431	0.534906	-1.12331	0.154887	0.628058	0.418948	-0.0158806	-0.458314	-0.0872373	-0.496863	-0.699166	-0.938683	-0.516812	-0.6142	0.563183	-0.706679	0.026235	-0.17514
19.5189		0.491559	-0.914041	2.58786	0.0310461	1.16664	-0.936637	-0.0574639	0.180815	0.173483	-0.700006	-0.240718	0.246235	-0.485498	-0.617977	-0.811281	-0.459094	-1.12699	-1.67758	-0.528765	-0.701446	-0.331971		-0.0519622	-1.13904	0.0668025	0.285408	0.841659	-0.0494137	-1.5574	-0.394305	-0.346271	0.655489	-1.02277	0.12702	0.682579	0.431503	-0.000458016	-0.450661	-0.171387	-0.664125	-0.630498	-0.988835	-0.48018	-0.439804	0.550705	-0.72857	0.044898	-0.15911
19.5691		0.492605	-0.963435	2.47355	0.00547545	1.07982	-0.907357	-0.0979717	0.143113	0.149922	-0.543493	-0.246259	0.203286	-0.410927	-0.640654	-0.816777	-0.537467	-1.29027	-1.62923	-0.604033	-0.82065	-0.25658		0.0812857	-1.23252	0.19045	0.277334	0.920893	0.00613561	-1.55897	-0.320181	-0.329612	0.799925	-0.905027	0.0883903	0.735718	0.420088	0.0103402	-0.513429	-0.178376	-0.809816	-0.499257	-1.02798	-0.488597	-0.174414	0.406423	-0.602212	0.039056	-0.1756
19.6193		0.488456	-0.931894	2.43197	0.201004	1.04274	-0.923856	-0.13168	0.123793	0.149042	-0.408515	-0.208117	0.182622	-0.415494	-0.641915	-0.755569	-0.546217	-1.43063	-1.62675	-0.677025	-0.890534	-0.220372		0.142317	-1.29885	0.268212	0.323646	0.891755	-0.0103989	-1.53192	-0.243408	-0.285081	0.886602	-0.842074	0.0542893	0.75121	0.368745	0.00498491	-0.6686	-0.160631	-0.785645	-0.458347	-1.05085	-0.526725	-0.0264665	0.270474	-0.580315	0.065627	-0.21252
19.6694		0.452408	-0.883856	2.55161	0.426271	1.02856	-0.980032	-0.128195	0.127407	0.165712	-0.291005	-0.259793	0.117068	-0.499959	-0.599433	-0.668998	-0.507179	-1.50971	-1.64619	-0.74884	-0.91083	-0.24056		0.120855	-1.26935	0.196325	0.306851	0.73584	-0.0519345	-1.44786	-0.207203	-0.238781	0.882948	-0.825489	0.000374698	0.755426	0.336419	0.00526061	-0.791117	-0.138819	-0.525579	-0.551835	-1.06116	-0.52482	-0.100631	0.258819	-0.745422	0.120003	-0.25483
19.7196		0.366249	-0.899054	2.72474	0.514635	1.03329	-1.00929	-0.0938678	0.138343	0.164366	-0.155538	-0.317381	0.0192477	-0.612829	-0.555711	-0.643576	-0.482184	-1.55489	-1.65303	-0.80079	-0.916525	-0.291284		0.0711811	-1.1746	0.0255072	0.219548	0.647346	-0.0664294	-1.31722	-0.19087	-0.202881	0.816538	-0.797363	-0.0900057	0.791338	0.356914	0.00539232	-0.679006	-0.0726351	-0.123922	-0.639991	-1.03654	-0.464666	-0.251087	0.299815	-0.851329	0.152182	-0.28824
19.7698		0.259902	-0.963212	2.80247	0.539446	1.11294	-1.01149	-0.0745897	0.137768	0.144742	0.00589062	-0.223145	-0.0164732	-0.68162	-0.566833	-0.739257	-0.458887	-1.58571	-1.65943	-0.79354	-0.906541	-0.311799		0.0337285	-1.09666	-0.106366	0.150081	0.715351	-0.0643827	-1.17832	-0.156303	-0.174783	0.738436	-0.741436	-0.206595	0.834393	0.390897	-0.0266204	-0.306583	0.0469789	0.221682	-0.58817	-0.94898	-0.403612	-0.308792	0.241065	-0.723175	0.152068	-0.29863
19.82		0.17222	-1.00021	2.75614	0.639572	1.28703	-1.04882	-0.0992912	0.124011	0.141086	0.149168	-0.0531007	0.0356282	-0.670524	-0.592217	-0.881354	-0.374886	-1.57999	-1.69334	-0.731577	-0.878982	-0.285706		-0.00607662	-1.09894	-0.14863	0.134511	0.792048	-0.0681268	-1.07335	-0.110114	-0.144341	0.676768	-0.669773	-0.318072	0.824693	0.399025	-0.086496	0.0965781	0.161491	0.359737	-0.440392	-0.840038	-0.387888	-0.308921	0.0869703	-0.545027	0.160098	-0.28511
19.8701		0.0887115	-0.963621	2.63857	0.777623	1.46328	-1.11955	-0.139023	0.110605	0.160998	0.213457	-0.035771	0.113117	-0.593675	-0.550325	-0.897677	-0.235378	-1.52546	-1.73355	-0.68916	-0.858512	-0.260794		-0.0607988	-1.18417	-0.169572	0.1187	0.753875	-0.070604	-1.02221	-0.090058	-0.111141	0.615783	-0.565352	-0.38803	0.772873	0.393514	-0.130261	0.284309	0.201431	0.287471	-0.334767	-0.812308	-0.391757	-0.358847	0.00213299	-0.575868	0.189481	-0.26285
19.9203		-0.0266793	-0.859439	2.48152	0.806994	1.53306	-1.13369	-0.145031	0.107314	0.177328	0.189986	-0.197043	0.174275	-0.482547	-0.480552	-0.714422	-0.122102	-1.45371	-1.72505	-0.723487	-0.851123	-0.260982		-0.100267	-1.26842	-0.244864	0.0591784	0.691986	-0.0652545	-0.993232	-0.110607	-0.088527	0.524896	-0.431411	-0.406709	0.754361	0.390886	-0.14437	0.246288	0.143466	0.107416	-0.310785	-0.897494	-0.365156	-0.421281	0.0534458	-0.776663	0.194302	-0.2499
19.9705		-0.160038	-0.724588	2.31616	0.678633	1.51773	-1.04836	-0.111633	0.113296	0.177987	0.14444	-0.332355	0.210788	-0.373755	-0.512389	-0.464167	-0.0746044	-1.39973	-1.65559	-0.789777	-0.837971	-0.237697		-0.101923	-1.23747	-0.373016	-0.0136412	0.725644	-0.0578139	-0.917991	-0.14912	-0.0765531	0.408322	-0.356543	-0.400502	0.790845	0.376092	-0.163432	0.170159	0.0293395	-0.0967418	-0.28436	-0.990995	-0.308822	-0.410837	0.0863293	-0.911636	0.148922	-0.25917
20.0207		-0.270171	-0.6103	2.21833	0.464396	1.52861	-0.944188	-0.0730812	0.126441	0.175723	0.141338	-0.336368	0.194711	-0.315795	-0.657371	-0.353445	-0.0418904	-1.3679	-1.56983	-0.798647	-0.838401	-0.15366		-0.0910336	-1.09259	-0.49527	-0.046154	0.792493	-0.0373168	-0.771909	-0.175955	-0.0467321	0.305833	-0.418718	-0.386603	0.814681	0.343324	-0.197897	0.207361	-0.060828	-0.309833	-0.187651	-0.980358	-0.267248	-0.388933	-0.0505122	-0.896121	0.110825	-0.29308
20.0708		-0.360866	-0.544758	2.22031	0.250359	1.58239	-0.905787	-0.050407	0.144033	0.172231	0.153999	-0.323525	0.118497	-0.335592	-0.781617	-0.450798	0.0162496	-1.35759	-1.50046	-0.732493	-0.907681	-0.0589694		-0.0892758	-0.983044	-0.56749	-0.0344161	0.768935	0.0126962	-0.624618	-0.178271	0.0212504	0.236348	-0.546848	-0.340438	0.77317	0.318627	-0.200335	0.345759	-0.0877729	-0.514987	-0.0557303	-0.883015	-0.261467	-0.452701	-0.270126	-0.846351	0.139948	-0.33387
20.121		-0.467197	-0.50326	2.22071	0.0972977	1.56597	-0.901013	-0.0365096	0.153769	0.159525	0.0979494	-0.387533	0.0344289	-0.395749	-0.814563	-0.624474	0.0543915	-1.3794	-1.43499	-0.639836	-1.03778	-0.0229954		-0.0681247	-1.01301	-0.60088	-0.0257229	0.681531	0.0734381	-0.570808	-0.160116	0.101086	0.168711	-0.591541	-0.241118	0.699495	0.313147	-0.139302	0.488163	-0.0997872	-0.627359	0.0347098	-0.7883	-0.271116	-0.525877	-0.377274	-0.833902	0.186908	-0.35702
20.1712		-0.589309	-0.459294	2.10363	0.0367933	1.41686	-0.867356	-0.0299843	0.141878	0.153369	-0.0425572	-0.457604	-0.0278882	-0.43087	-0.819102	-0.664342	0.021738	-1.4237	-1.3721	-0.539977	-1.12359	-0.034505		-0.00332955	-1.08128	-0.629878	-0.0521567	0.652195	0.111235	-0.624116	-0.135556	0.145157	0.0747777	-0.525705	-0.116442	0.647411	0.301337	-0.0602773	0.570715	-0.147834	-0.553932	0.0604302	-0.730465	-0.285815	-0.485133	-0.359536	-0.788231	0.148148	-0.37114
20.2214		-0.696076	-0.445775	1.93207	0.0304307	1.23186	-0.847928	-0.0439491	0.11389	0.178431	-0.184981	-0.447976	-0.103374	-0.429447	-0.813588	-0.465623	-0.0458319	-1.45583	-1.35654	-0.416819	-1.07594	-0.0394004		0.058166	-1.02067	-0.657647	-0.0787442	0.70251	0.129552	-0.716983	-0.121602	0.136302	-0.00916812	-0.465306	0.00704186	0.611881	0.271267	-0.0290203	0.576507	-0.172945	-0.31196	0.0590816	-0.706727	-0.322537	-0.408796	-0.373081	-0.684304	0.017712	-0.42069
20.2716		-0.771985	-0.495058	1.89767	-0.00620674	1.14013	-0.914708	-0.0716825	0.0929173	0.220237	-0.268576	-0.365327	-0.183654	-0.437688	-0.718902	-0.119397	-0.0861372	-1.46521	-1.40986	-0.295384	-0.929977	-0.045676		0.0414221	-0.844942	-0.670396	-0.0487022	0.738427	0.149538	-0.787649	-0.127393	0.0912425	-0.0153872	-0.489173	0.164755	0.554632	0.251751	-0.0477184	0.502073	-0.0695279	-0.0250549	0.067079	-0.747045	-0.367644	-0.457006	-0.456191	-0.663316	-0.11703	-0.52266
20.3217		-0.809866	-0.547778	2.06122	-0.0869304	1.16101	-1.00944	-0.0793897	0.0966156	0.236552	-0.334205	-0.213324	-0.185739	-0.482734	-0.557199	0.180153	-0.115106	-1.47548	-1.4663	-0.232369	-0.795966	-0.108912		-0.0605135	-0.72911	-0.694474	0.017395	0.695606	0.156531	-0.822494	-0.145934	0.0307402	0.0635699	-0.54527	0.393943	0.470648	0.263751	-0.0710959	0.374815	0.130652	0.215741	0.085436	-0.848626	-0.36026	-0.577184	-0.44882	-0.84361	-0.22197	-0.62463
20.3719		-0.786641	-0.522785	2.25814	-0.133842	1.24826	-1.02058	-0.0527025	0.126373	0.219798	-0.43786	0.0408985	-0.109224	-0.538701	-0.495968	0.319655	-0.184841	-1.49004	-1.44047	-0.223144	-0.729557	-0.220815		-0.179674	-0.762272	-0.771045	0.0276322	0.607522	0.124608	-0.829586	-0.157847	-0.0284344	0.158481	-0.553202	0.634701	0.390629	0.283693	-0.0800743	0.26578	0.244628	0.417071	0.111504	-0.899908	-0.284565	-0.589888	-0.255528	-1.10382	-0.32964	-0.66393
20.4221		-0.703671	-0.459071	2.30353	-0.111783	1.38142	-0.98852	-0.0222418	0.169423	0.20507	-0.550573	0.343243	-0.0875931	-0.576599	-0.579826	0.328022	-0.27069	-1.48382	-1.33661	-0.200582	-0.702557	-0.294565		-0.259335	-0.84981	-0.864068	-0.0413685	0.543107	0.0779503	-0.827697	-0.147676	-0.0714792	0.207149	-0.505328	0.78014	0.336244	0.278963	-0.0950314	0.216788	0.163154	0.580349	0.169196	-0.802928	-0.223521	-0.516464	-0.0299425	-1.20853	-0.39908	-0.65282
20.4723		-0.630909	-0.471023	2.19348	-0.0909144	1.53153	-1.04592	-0.0200103	0.196706	0.209023	-0.615857	0.547726	-0.179857	-0.606091	-0.618871	0.273618	-0.301423	-1.46781	-1.22567	-0.137151	-0.690949	-0.283657		-0.312789	-0.881676	-0.875931	-0.086513	0.534537	0.0661602	-0.8593	-0.123415	-0.0982895	0.211394	-0.432942	0.826958	0.298573	0.249273	-0.129925	0.182056	0.00333542	0.637389	0.269802	-0.636837	-0.247447	-0.548984	0.0173147	-1.11362	-0.32618	-0.65867
20.5224		-0.651623	-0.567521	2.04989	-0.120442	1.61224	-1.15671	-0.0344517	0.177565	0.206956	-0.659041	0.609337	-0.249164	-0.65104	-0.488535	0.190372	-0.290325	-1.4916	-1.13074	-0.0715815	-0.722389	-0.251887		-0.391178	-0.884995	-0.785999	-0.0350472	0.561737	0.0873166	-0.956297	-0.11644	-0.11651	0.193944	-0.336233	0.879384	0.251949	0.215479	-0.17053	0.111361	-0.0531914	0.571905	0.360752	-0.570101	-0.297906	-0.714217	-0.0919763	-0.985441	-0.14927	-0.70208
20.5726		-0.761607	-0.638869	1.95354	-0.132348	1.56015	-1.1314	-0.0358944	0.121823	0.188832	-0.746862	0.652215	-0.171732	-0.712504	-0.350496	0.126298	-0.324467	-1.54935	-1.01252	-0.0260696	-0.803106	-0.285461		-0.511909	-0.950312	-0.688159	0.0164692	0.583843	0.0897244	-1.0802	-0.144605	-0.108733	0.146968	-0.181202	0.981423	0.180523	0.191419	-0.193529	0.0562759	-0.0269708	0.510993	0.375821	-0.631294	-0.27543	-0.831854	-0.125121	-0.92786	-0.08156	-0.72777
20.6228		-0.864004	-0.629654	1.90571	-0.0447862	1.4237	-0.944295	-0.0262341	0.0870761	0.191801	-0.852034	0.76352	-0.0399801	-0.772725	-0.396452	0.157812	-0.408136	-1.55701	-0.867959	0.0228904	-0.854234	-0.37761		-0.630578	-1.07712	-0.646062	-0.0564687	0.591247	0.0471091	-1.14726	-0.173182	-0.043333	0.0614568	0.0563745	1.05179	0.10214	0.176606	-0.184761	0.108434	-0.122936	0.578644	0.343361	-0.693836	-0.200535	-0.809436	0.0696148	-0.877253	-0.23985	-0.69478
20.673		-0.87226	-0.598257	1.89183	0.105751	1.30143	-0.810289	-0.0299308	0.111335	0.240511	-0.858852	0.840958	-0.0174401	-0.813628	-0.53235	0.286594	-0.430669	-1.47181	-0.760777	0.0785025	-0.791989	-0.448727		-0.689826	-1.17029	-0.604511	-0.178112	0.621601	-0.00683663	-1.13375	-0.141543	0.0641863	-0.0265327	0.341205	1.03522	0.0623244	0.160395	-0.145495	0.26207	-0.415876	0.736107	0.365109	-0.679242	-0.170393	-0.731237	0.375153	-0.793126	-0.47128	-0.64532
20.7231		-0.792608	-0.585891	1.89791	0.207208	1.22943	-0.854263	-0.0474701	0.158002	0.292355	-0.737516	0.761496	-0.0937129	-0.814069	-0.519989	0.397932	-0.335376	-1.36623	-0.72874	0.109116	-0.651063	-0.458515		-0.694392	-1.17359	-0.511732	-0.153583	0.705115	-0.0165969	-1.11137	-0.0461739	0.143218	-0.0668283	0.562275	1.00715	0.0840448	0.135669	-0.094387	0.424677	-0.673259	0.895302	0.451051	-0.645245	-0.181914	-0.649677	0.530391	-0.745253	-0.55388	-0.64254
20.7733		-0.698508	-0.552565	1.8903	0.208484	1.19039	-0.916316	-0.053766	0.16511	0.294122	-0.629663	0.61213	-0.132267	-0.753992	-0.32202	0.400995	-0.217598	-1.32281	-0.724151	0.118119	-0.550543	-0.446133		-0.711883	-1.14513	-0.434601	0.0240568	0.811975	0.0380523	-1.15096	0.0330108	0.146064	-0.0596655	0.608167	1.04071	0.129767	0.118805	-0.0536502	0.532453	-0.620352	1.095	0.468679	-0.652339	-0.141565	-0.537884	0.413112	-0.741846	-0.45591	-0.67378
20.8235		-0.649218	-0.481411	1.84875	0.162286	1.19067	-0.820946	-0.0416597	0.12919	0.270271	-0.683766	0.60236	-0.0929317	-0.655639	-0.112893	0.358611	-0.182934	-1.31537	-0.679431	0.151905	-0.532625	-0.462296		-0.778758	-1.17684	-0.451623	0.135231	0.887081	0.109481	-1.22964	0.021782	0.0991269	-0.0499448	0.487485	1.06482	0.141915	0.134895	-0.0272679	0.578561	-0.329277	1.38146	0.333273	-0.658983	-0.0575091	-0.457436	0.171166	-0.677355	-0.2953	-0.67189
20.8737		-0.650621	-0.434773	1.81436	0.153782	1.25459	-0.65471	-0.0345672	0.0955549	0.293078	-0.847925	0.77266	-0.0635735	-0.603564	-0.0197871	0.392719	-0.186054	-1.26721	-0.589307	0.21657	-0.51216	-0.508698		-0.838994	-1.26355	-0.50632	0.058435	0.922756	0.113652	-1.26974	-0.0542511	0.0595803	-0.0620896	0.326947	0.970208	0.115485	0.167536	-0.00777178	0.572076	-0.156863	1.59457	0.159637	-0.599622	-0.063017	-0.509331	0.057215	-0.549516	-0.15643	-0.62237
20.9239		-0.677017	-0.453197	1.85258	0.215786	1.36028	-0.603503	-0.0484834	0.0828223	0.373012	-0.924688	0.934611	-0.103794	-0.669915	-0.0218437	0.490326	-0.0964116	-1.18188	-0.502819	0.258846	-0.407959	-0.552653		-0.821413	-1.29117	-0.49032	-0.0458685	0.957731	0.0297411	-1.24304	-0.102894	0.0553275	-0.0771772	0.220552	0.793691	0.093461	0.158627	-0.00430346	0.536219	-0.267146	1.51933	0.108486	-0.490768	-0.198462	-0.59564	0.153213	-0.525314	-0.06752	-0.5885
20.974		-0.701756	-0.484108	1.96413	0.308342	1.44203	-0.654912	-0.0664238	0.0706743	0.445706	-0.834898	0.92682	-0.175722	-0.814419	-0.055384	0.503458	0.11907	-1.1338	-0.464844	0.253978	-0.246481	-0.563992		-0.751787	-1.17571	-0.428136	0.0179166	1.00815	-0.0522425	-1.19415	-0.0798496	0.0781241	-0.077717	0.138969	0.675168	0.0909616	0.0857004	-0.0363078	0.488371	-0.434173	1.23459	0.151929	-0.40963	-0.324531	-0.504661	0.310289	-0.673974	-0.06807	-0.61528
21.0242		-0.709297	-0.464518	2.06921	0.379057	1.45654	-0.654958	-0.0611278	0.0548397	0.471597	-0.722222	0.808562	-0.218108	-0.914388	-0.0741544	0.358983	0.355568	-1.15059	-0.480524	0.247701	-0.0932583	-0.530978		-0.723325	-0.991893	-0.446944	0.2017	1.03601	-0.042352	-1.16591	-0.0287089	0.103031	-0.0783194	0.0183168	0.662853	0.0713458	0.0010639	-0.0917773	0.39418	-0.426819	1.05194	0.136818	-0.411387	-0.340174	-0.269832	0.358931	-0.833418	-0.16816	-0.66299
21.0744		-0.704826	-0.411102	2.08955	0.433105	1.41448	-0.568964	-0.0251147	0.0568714	0.478503	-0.744408	0.732672	-0.204919	-0.911521	-0.0410008	0.174282	0.494634	-1.18447	-0.512952	0.286373	0.0469959	-0.472076		-0.766714	-0.908841	-0.571779	0.323397	0.996226	0.0207384	-1.13775	-0.0101043	0.10979	-0.0962511	-0.136122	0.674734	0.0120933	-0.0403143	-0.123256	0.25786	-0.353324	1.07833	0.0341514	-0.497372	-0.341376	-0.158355	0.296642	-0.865525	-0.28785	-0.67311
21.1246		-0.714752	-0.377518	2.01996	0.505761	1.35379	-0.493313	0.0300096	0.0731023	0.491027	-0.855872	0.712719	-0.145622	-0.870118	0.0259879	0.096942	0.514809	-1.20007	-0.513073	0.358575	0.19879	-0.428229		-0.82429	-0.979042	-0.675893	0.343917	0.893325	0.0362929	-1.05264	-0.0311297	0.108065	-0.122155	-0.281541	0.645481	-0.0533561	-0.0520532	-0.104973	0.262612	-0.423148	1.10175	-0.047846	-0.62602	-0.43579	-0.256515	0.231126	-0.837335	-0.33709	-0.66054
21.1747		-0.753345	-0.369061	1.91109	0.572158	1.30389	-0.459088	0.0863117	0.066812	0.4921	-0.897072	0.620803	-0.0887553	-0.863344	0.037805	0.0946512	0.485696	-1.22079	-0.476894	0.423765	0.338356	-0.407112		-0.858422	-1.0527	-0.655523	0.379529	0.778427	0.00124034	-0.887527	-0.0523303	0.12618	-0.140427	-0.401908	0.612423	-0.089622	-0.0764119	-0.0696754	0.61054	-0.579535	0.967854	-0.0882587	-0.732249	-0.527619	-0.36998	0.212864	-0.817775	-0.32495	-0.68579
21.2249		-0.790123	-0.350759	1.81047	0.560164	1.26642	-0.408524	0.122612	0.0267593	0.483871	-0.83694	0.40283	-0.0947364	-0.870071	-0.0415353	0.0109014	0.484651	-1.27254	-0.465292	0.457667	0.420269	-0.351322		-0.903792	-0.965837	-0.552338	0.506838	0.704123	-0.0120783	-0.675024	-0.0334555	0.152554	-0.148868	-0.486605	0.640137	-0.11472	-0.113582	-0.0641686	1.1676	-0.640015	0.791063	-0.200365	-0.76894	-0.459844	-0.396591	0.188725	-0.720883	-0.31873	-0.75349
21.2751		-0.780428	-0.314244	1.73669	0.470968	1.21745	-0.349177	0.123794	-0.0119503	0.514536	-0.794879	0.199065	-0.153027	-0.834461	-0.109487	-0.190097	0.517165	-1.33702	-0.533945	0.465663	0.446413	-0.213225		-0.986701	-0.771759	-0.471415	0.700763	0.695159	-0.0116494	-0.457237	0.0381327	0.130628	-0.13642	-0.507292	0.728486	-0.15912	-0.137478	-0.0850717	1.51544	-0.637784	0.69454	-0.409924	-0.745038	-0.285778	-0.465684	0.0900203	-0.517921	-0.32766	-0.80033
21.3253		-0.726212	-0.287016	1.68309	0.399845	1.13877	-0.3602	0.0998827	-0.0242284	0.598883	-0.840256	0.186299	-0.177136	-0.766852	-0.0622723	-0.358583	0.514285	-1.3877	-0.655293	0.485772	0.438429	-0.0410021		-1.07146	-0.690066	-0.460515	0.922539	0.744427	-0.0763884	-0.245612	0.140529	0.0519081	-0.0804112	-0.472051	0.817531	-0.199043	-0.149889	-0.0869122	1.45539	-0.724127	0.620862	-0.558332	-0.69803	-0.200285	-0.606039	-0.0749848	-0.392199	-0.292	-0.79095
21.3755		-0.668929	-0.280668	1.62356	0.400095	1.04664	-0.433825	0.0791887	-0.0299394	0.669646	-0.907651	0.331022	-0.137288	-0.714085	0.03444	-0.369998	0.422246	-1.43483	-0.75432	0.567131	0.37308	0.0777677		-1.12861	-0.831454	-0.503251	1.13709	0.808551	-0.190331	-0.043729	0.225804	-0.00183955	0.00512297	-0.452216	0.847067	-0.183753	-0.171616	-0.0475148	1.21305	-0.858053	0.531581	-0.511212	-0.635365	-0.230061	-0.618987	-0.212415	-0.488318	-0.17545	-0.76876
21.4256		-0.621541	-0.27478	1.54061	0.410776	0.968123	-0.460484	0.0710595	-0.0500376	0.659534	-0.928588	0.395882	-0.123535	-0.671193	0.0209112	-0.284024	0.28061	-1.50326	-0.813799	0.712692	0.223737	0.144092		-1.18639	-1.07192	-0.561908	1.2726	0.821046	-0.23659	0.114387	0.249596	0.0295186	0.0682613	-0.505636	0.801538	-0.119112	-0.199986	0.00206892	1.0413	-0.897397	0.526871	-0.333924	-0.542879	-0.191804	-0.441782	-0.237069	-0.677946	-0.02625	-0.78525
21.4758		-0.552093	-0.264465	1.46725	0.365443	0.896971	-0.399505	0.0556972	-0.0678482	0.591385	-0.920478	0.238442	-0.198302	-0.607272	-0.139798	-0.220581	0.173764	-1.58144	-0.887495	0.864555	0.0420615	0.241884		-1.26355	-1.21727	-0.5932	1.28265	0.755799	-0.186294	0.185307	0.204196	0.0877895	0.105134	-0.614111	0.715752	-0.0706306	-0.213193	0.0177586	0.903879	-0.892812	0.621435	-0.174419	-0.439147	0.0162341	-0.32295	-0.19048	-0.758554	0.058339	-0.82474
21.526		-0.445836	-0.283537	1.46515	0.295742	0.815534	-0.333707	0.024701	-0.0623948	0.541227	-0.912782	0.016775	-0.268021	-0.557437	-0.316871	-0.176148	0.118067	-1.62095	-1.00277	0.974274	-0.0905115	0.408911		-1.31143	-1.19945	-0.574073	1.22944	0.676516	-0.153061	0.173288	0.122399	0.0914527	0.185439	-0.732317	0.638457	-0.0751025	-0.204739	-0.00734358	0.701075	-0.987309	0.658064	-0.0807992	-0.367165	0.25745	-0.439433	-0.213673	-0.743069	0.024771	-0.83784
21.5762		-0.343533	-0.351449	1.53931	0.276247	0.760147	-0.320237	0.00603191	-0.0441414	0.544892	-0.902643	-0.0137031	-0.208682	-0.58525	-0.368946	-0.0780197	0.0534601	-1.59387	-1.11298	1.05373	-0.17934	0.592784		-1.28003	-1.08476	-0.533878	1.20392	0.670657	-0.209447	0.135988	0.0509531	0.0755312	0.342745	-0.850672	0.591424	-0.0940525	-0.190425	-0.0446375	0.537894	-1.11583	0.584152	-0.0215637	-0.336164	0.35948	-0.615175	-0.359078	-0.783329	-0.07677	-0.81745
21.6263		-0.29918	-0.428751	1.62119	0.325055	0.801431	-0.313425	0.0253064	-0.0267885	0.583193	-0.914043	0.145765	-0.0510369	-0.640502	-0.273311	0.0370796	-0.054838	-1.53948	-1.17472	1.12862	-0.28497	0.740525		-1.19509	-0.978148	-0.517814	1.1926	0.728371	-0.273587	0.125901	0.0197666	0.136154	0.517373	-0.971892	0.580112	-0.076401	-0.191763	-0.0718863	0.56895	-1.09793	0.55369	0.00817312	-0.320688	0.341084	-0.634366	-0.504417	-0.917461	-0.14296	-0.79747
21.6765		-0.324865	-0.463289	1.66331	0.398432	0.932366	-0.288132	0.0643448	0.00287635	0.631283	-0.978364	0.245729	0.0795386	-0.57379	-0.118163	0.040456	-0.172308	-1.53279	-1.21676	1.1842	-0.374825	0.854954		-1.11718	-0.95126	-0.518333	1.12268	0.747765	-0.244476	0.146431	0.0241952	0.26465	0.674136	-1.07123	0.627801	-0.0323292	-0.220083	-0.0979683	0.760908	-0.943231	0.626348	-0.00536307	-0.301918	0.344323	-0.582663	-0.53039	-1.03882	-0.14053	-0.79374
21.7267		-0.390384	-0.456699	1.69302	0.440869	1.04154	-0.319337	0.0866285	0.0544164	0.679088	-1.02869	0.146943	0.155021	-0.360546	-0.026185	-0.089459	-0.264255	-1.59597	-1.28554	1.19078	-0.3234	0.948596		-1.06199	-0.986826	-0.498152	1.00032	0.673019	-0.149103	0.171799	0.0294289	0.344606	0.876992	-1.12246	0.752967	-0.00893601	-0.262063	-0.142333	0.96154	-0.796486	0.65387	-0.0442203	-0.256825	0.417574	-0.634902	-0.499207	-1.04409	-0.14476	-0.78876
21.7769		-0.459378	-0.443403	1.7418	0.422894	1.05066	-0.453195	0.0873222	0.105295	0.718147	-0.951917	-0.0132395	0.246077	-0.198619	-0.0581828	-0.21276	-0.338424	-1.66345	-1.3631	1.14917	-0.100212	1.01332		-1.00294	-0.978975	-0.47205	0.893178	0.559367	-0.0828954	0.186461	0.00202729	0.316646	1.14485	-1.12992	0.918814	-0.0083472	-0.285389	-0.200502	1.07231	-0.683234	0.600918	-0.0885787	-0.140229	0.461507	-0.722368	-0.53813	-0.922128	-0.22808	-0.7705
21.827		-0.51441	-0.423383	1.79201	0.368496	1.01868	-0.587638	0.0876784	0.136643	0.743373	-0.780563	-0.0663778	0.357752	-0.257388	-0.142499	-0.216429	-0.390266	-1.66184	-1.39706	1.09084	0.144552	1.05767		-0.914533	-0.868624	-0.490257	0.811221	0.480861	-0.0809138	0.184404	-0.0558156	0.252605	1.33741	-1.10321	1.05912	0.0248821	-0.280339	-0.244224	1.0737	-0.565516	0.659907	-0.145455	0.0444656	0.376543	-0.681346	-0.615971	-0.756398	-0.35303	-0.75287
21.8772		-0.553402	-0.358657	1.83288	0.342425	1.03198	-0.588131	0.0915951	0.165336	0.762266	-0.681128	-0.0458389	0.393122	-0.40896	-0.139969	-0.156357	-0.375377	-1.60238	-1.3913	1.06098	0.248133	1.11244		-0.781246	-0.763559	-0.540332	0.722216	0.446951	-0.116845	0.144962	-0.111756	0.243074	1.32756	-1.03525	1.15458	0.124146	-0.281833	-0.257174	1.00463	-0.519661	0.878599	-0.203594	0.188202	0.198357	-0.559929	-0.594344	-0.675406	-0.42538	-0.75325
21.9274		-0.572903	-0.225459	1.89099	0.371895	1.04814	-0.479627	0.080378	0.205411	0.784427	-0.707336	-0.0706957	0.293484	-0.379083	-0.0229796	-0.151378	-0.28707	-1.55052	-1.40671	1.09756	0.217123	1.17498		-0.606551	-0.805579	-0.549025	0.653897	0.439093	-0.166891	0.0459034	-0.145141	0.284713	1.204	-0.93475	1.23326	0.248289	-0.318422	-0.254961	0.94348	-0.59858	0.997926	-0.22398	0.184714	0.055682	-0.497657	-0.478436	-0.730717	-0.42364	-0.76908
21.9776		-0.569554	-0.041719	1.959	0.404081	0.967607	-0.421095	0.0478425	0.231748	0.812228	-0.731605	-0.144373	0.118616	-0.135269	0.0708612	-0.219394	-0.208987	-1.52254	-1.47513	1.18691	0.173025	1.2032		-0.437521	-0.933136	-0.495113	0.656536	0.456746	-0.20696	-0.0918855	-0.168969	0.31463	1.13868	-0.839713	1.30439	0.337556	-0.356252	-0.258831	0.90257	-0.656526	0.858913	-0.21289	0.0757127	0.0145841	-0.438947	-0.443514	-0.826593	-0.41612	-0.78197
22.0278		-0.560144	0.140907	1.97873	0.386883	0.83598	-0.493704	0.0121	0.223131	0.848482	-0.683675	-0.199157	-0.0378972	0.0711461	0.018378	-0.293857	-0.230459	-1.47343	-1.56447	1.25678	0.171405	1.18932		-0.328169	-0.934388	-0.44255	0.685298	0.489945	-0.197921	-0.208716	-0.204749	0.306929	1.123	-0.76325	1.35265	0.387671	-0.336246	-0.261987	0.787972	-0.568178	0.658004	-0.232981	-0.00841284	0.0186425	-0.262865	-0.568723	-0.849054	-0.45922	-0.77879
22.0779		-0.573351	0.261705	1.94595	0.351513	0.827973	-0.600049	-0.0105566	0.209729	0.891846	-0.675406	-0.238984	-0.146754	0.0750976	-0.130525	-0.337709	-0.340218	-1.38556	-1.63322	1.26046	0.153821	1.18606		-0.256439	-0.750003	-0.444051	0.644044	0.509792	-0.142772	-0.277559	-0.251664	0.294465	1.03226	-0.664472	1.39484	0.422152	-0.258202	-0.239277	0.577726	-0.471473	0.577624	-0.300574	-0.0301673	0.00154808	-0.0983249	-0.692662	-0.819715	-0.53392	-0.76605
22.1281		-0.607351	0.30512	1.94065	0.356189	1.00259	-0.599244	-0.0204774	0.23047	0.920158	-0.788017	-0.314214	-0.230644	0.00456127	-0.252792	-0.356955	-0.456054	-1.30378	-1.6731	1.23964	0.0564108	1.23133		-0.138279	-0.550076	-0.48027	0.535898	0.520183	-0.118383	-0.338573	-0.291786	0.315067	0.919214	-0.515343	1.48288	0.421141	-0.185045	-0.183491	0.422757	-0.529281	0.464819	-0.339697	-0.0591995	-0.0168928	-0.188906	-0.627182	-0.814416	-0.58919	-0.75726
22.1783		-0.631127	0.340968	1.99676	0.391071	1.21345	-0.48214	-0.0189652	0.268276	0.909251	-0.905662	-0.422008	-0.305523	0.0275783	-0.336621	-0.345426	-0.534094	-1.26742	-1.6918	1.25225	-0.10535	1.29833		0.0528916	-0.473411	-0.505284	0.45398	0.563692	-0.178366	-0.430932	-0.314713	0.363788	1.01594	-0.361651	1.64746	0.349242	-0.163338	-0.114412	0.416618	-0.605034	0.134779	-0.285551	-0.12163	-0.0124742	-0.471253	-0.405335	-0.800489	-0.60681	-0.74465
22.2285		-0.64729	0.462375	2.04119	0.403914	1.32019	-0.366852	0.000726515	0.27817	0.874494	-0.89333	-0.525038	-0.370784	0.0821499	-0.450181	-0.294868	-0.596804	-1.26429	-1.69691	1.28275	-0.265297	1.34963		0.246372	-0.473838	-0.488641	0.428286	0.652435	-0.251916	-0.522842	-0.326448	0.397296	1.38896	-0.268357	1.87968	0.245345	-0.173542	-0.057561	0.417151	-0.468167	-0.261061	-0.183471	-0.151249	-0.048056	-0.599599	-0.188514	-0.70604	-0.61138	-0.70421
22.2786		-0.699527	0.6761	2.02506	0.377799	1.35821	-0.345083	0.0374854	0.262094	0.857446	-0.799566	-0.605108	-0.43114	0.0204135	-0.567636	-0.230378	-0.672849	-1.27062	-1.70514	1.28923	-0.369944	1.38519		0.380273	-0.484841	-0.415389	0.391888	0.746069	-0.217141	-0.552302	-0.341892	0.380665	1.77644	-0.23217	2.15302	0.20275	-0.162039	-0.0305286	0.292899	-0.21059	-0.441906	-0.138652	-0.0868044	-0.164058	-0.436362	-0.00386364	-0.587217	-0.64108	-0.64451
22.3288		-0.782408	0.907994	2.00624	0.322813	1.41591	-0.378924	0.0740228	0.262795	0.86484	-0.733968	-0.628741	-0.490292	-0.102883	-0.569582	-0.178239	-0.764992	-1.28327	-1.72734	1.29195	-0.39922	1.4014		0.481597	-0.539145	-0.310932	0.297361	0.809795	-0.0677564	-0.512499	-0.374854	0.328384	1.88035	-0.201558	2.41701	0.245082	-0.0979003	-0.039124	0.191433	-0.162449	-0.386503	-0.189951	0.0893763	-0.251579	-0.24894	0.251931	-0.546677	-0.71043	-0.62281
22.379		-0.813123	1.11049	2.02671	0.239302	1.46676	-0.359116	0.0948204	0.291484	0.863647	-0.655368	-0.540304	-0.53046	-0.0832663	-0.442678	-0.138554	-0.871281	-1.29169	-1.73774	1.33704	-0.363943	1.36321		0.60611	-0.62567	-0.249771	0.16709	0.840285	0.0711882	-0.449849	-0.424062	0.285516	1.71387	-0.160585	2.58982	0.2971	0.00541631	-0.0655397	0.328474	-0.433406	-0.279105	-0.263349	0.395435	-0.195546	-0.317504	0.569793	-0.530084	-0.78018	-0.67608
22.4292		-0.754506	1.28937	2.02696	0.14907	1.43732	-0.242306	0.100085	0.314764	0.844237	-0.44667	-0.363402	-0.534691	0.12882	-0.355588	-0.135451	-0.986943	-1.27355	-1.69881	1.41391	-0.310406	1.26757		0.751694	-0.61624	-0.266495	0.03509	0.838766	0.108497	-0.394185	-0.462958	0.26603	1.54293	-0.135809	2.61333	0.300842	0.11015	-0.0760787	0.632749	-0.778404	-0.220284	-0.251779	0.813188	-0.0898559	-0.564307	0.79209	-0.399824	-0.77848	-0.75452
22.4793		-0.696033	1.42794	1.97999	0.109333	1.34854	-0.10866	0.095698	0.316138	0.837005	-0.136377	-0.227981	-0.531939	0.349013	-0.456379	-0.224566	-1.08093	-1.24635	-1.62322	1.48432	-0.301854	1.18089		0.867047	-0.465892	-0.28521	-0.0626864	0.823132	0.0930038	-0.335499	-0.460327	0.241166	1.53589	-0.141061	2.51303	0.285755	0.192073	-0.0678479	0.844261	-0.916952	-0.201988	-0.137212	1.22171	-0.117294	-0.718547	0.860284	-0.189385	-0.68962	-0.77342
22.5295		-0.727702	1.47538	1.99189	0.1415	1.2662	-0.0778589	0.0864117	0.3198	0.851661	0.107094	-0.217659	-0.572912	0.407508	-0.667938	-0.384297	-1.11431	-1.26568	-1.57125	1.55365	-0.359695	1.1568		0.911739	-0.32357	-0.216425	-0.0564292	0.849836	0.113554	-0.260382	-0.422419	0.204831	1.59846	-0.179132	2.36857	0.292373	0.256862	-0.0850116	0.890667	-0.813465	-0.24426	-0.0201373	1.50231	-0.248379	-0.696103	0.898388	-0.0785488	-0.6057	-0.72831
22.5797		-0.79778	1.42533	2.14407	0.201235	1.1785	-0.18024	0.0864421	0.340806	0.854289	0.177762	-0.261741	-0.637599	0.347973	-0.780311	-0.477886	-1.0946	-1.33119	-1.57866	1.63795	-0.432699	1.16545		0.883328	-0.306167	-0.0825894	0.0838885	0.942411	0.157764	-0.175416	-0.396607	0.205878	1.57501	-0.274359	2.23857	0.30006	0.313338	-0.150872	0.936881	-0.640777	-0.362625	-0.00514054	1.70838	-0.2828	-0.63798	0.967996	-0.109863	-0.63132	-0.70369
22.6299		-0.802659	1.32937	2.33376	0.253849	1.04127	-0.33385	0.114409	0.357467	0.82843	0.110307	-0.252003	-0.623787	0.320377	-0.710561	-0.414224	-1.07888	-1.35026	-1.62453	1.70006	-0.452218	1.16223		0.80911	-0.315198	0.0387739	0.248419	1.02049	0.144985	-0.100608	-0.417123	0.271878	1.49844	-0.420703	2.14393	0.27673	0.34625	-0.212037	1.08172	-0.584648	-0.477682	-0.0709903	1.99149	-0.188779	-0.649688	0.938099	-0.136415	-0.74111	-0.75382
22.6801		-0.766262	1.21962	2.4098	0.303857	0.893676	-0.447959	0.163606	0.353736	0.809224	-0.0260867	-0.195627	-0.48579	0.355173	-0.575111	-0.280833	-1.10751	-1.25409	-1.67449	1.70413	-0.402998	1.17643		0.729198	-0.226865	0.132708	0.285525	0.999009	0.0671279	-0.0603042	-0.462585	0.336439	1.53274	-0.515758	2.09562	0.242062	0.343815	-0.203741	1.19386	-0.6847	-0.497563	-0.0973434	2.35058	-0.153906	-0.684657	0.716584	-0.0836672	-0.80352	-0.82978
22.7302		-0.801656	1.08595	2.39096	0.326352	0.813474	-0.505222	0.199529	0.349782	0.82812	-0.20264	-0.172988	-0.334613	0.327706	-0.520632	-0.222877	-1.1574	-1.10634	-1.71439	1.7105	-0.31218	1.26124		0.676004	-0.121394	0.196193	0.207173	0.932099	0.00756537	-0.0637893	-0.481977	0.307162	1.70926	-0.457324	2.08471	0.230501	0.341275	-0.146878	1.0873	-0.815077	-0.42957	-0.0155223	2.6037	-0.253871	-0.676486	0.428461	-0.0571222	-0.75724	-0.85644
22.7804		-0.920368	0.939628	2.40659	0.274036	0.792322	-0.516884	0.20484	0.365009	0.864206	-0.393496	-0.200993	-0.311539	0.138512	-0.585063	-0.25278	-1.17427	-1.02449	-1.73073	1.83021	-0.200259	1.39155		0.657299	-0.153217	0.146039	0.164406	0.935754	0.0170882	-0.0809771	-0.445336	0.195215	1.86082	-0.315145	2.05093	0.23113	0.391725	-0.117222	0.751786	-0.851682	-0.327879	0.117944	2.63994	-0.323375	-0.628422	0.227992	-0.12353	-0.68195	-0.83366
22.8306		-1.01812	0.834629	2.48029	0.181673	0.762383	-0.459137	0.20407	0.383652	0.878704	-0.550519	-0.22219	-0.398085	-0.137299	-0.727785	-0.279469	-1.13492	-1.02182	-1.69661	2.08021	-0.0885815	1.48025		0.653326	-0.302576	-0.0686856	0.201431	0.989099	0.0530979	-0.0693682	-0.357112	0.109609	1.84948	-0.282414	1.91419	0.210512	0.486253	-0.135529	0.359903	-0.851581	-0.213916	0.202488	2.55186	-0.252585	-0.548636	0.101995	-0.182408	-0.66072	-0.81591
22.8808		-1.05247	0.802594	2.52623	0.146989	0.72226	-0.329851	0.221406	0.384975	0.865943	-0.646839	-0.203689	-0.463695	-0.323926	-0.886587	-0.26253	-1.06736	-1.0091	-1.59796	2.35307	-0.0164254	1.47617		0.632942	-0.421841	-0.30966	0.188832	0.963709	0.0637184	-0.0433104	-0.247441	0.111343	1.72759	-0.415848	1.6596	0.169438	0.548235	-0.155212	0.0899644	-0.966593	-0.116071	0.199829	2.46128	-0.175454	-0.432177	-0.00296545	-0.164274	-0.65715	-0.8256
22.9309		-1.09767	0.803147	2.52917	0.17712	0.734321	-0.227515	0.238683	0.378759	0.845074	-0.704599	-0.181169	-0.4759	-0.341199	-0.975059	-0.22243	-1.02001	-0.947058	-1.45684	2.55221	0.0154545	1.39598		0.590706	-0.447186	-0.372507	0.0512502	0.850347	0.0579856	-0.0724618	-0.169511	0.137383	1.60283	-0.552455	1.36931	0.136082	0.529336	-0.150233	-0.0104541	-1.19127	-0.0953201	0.147133	2.35334	-0.222612	-0.331456	-0.0345398	-0.186646	-0.59465	-0.83757
22.9811		-1.19524	0.759277	2.56845	0.180802	0.805742	-0.267152	0.227538	0.379315	0.824639	-0.760077	-0.204825	-0.51841	-0.265792	-0.926268	-0.152645	-1.01649	-0.910671	-1.32242	2.70112	0.0796045	1.28137		0.569446	-0.417321	-0.256594	-0.101294	0.785593	0.0596922	-0.181297	-0.173499	0.103378	1.47772	-0.556004	1.1502	0.115913	0.47501	-0.14971	0.00817579	-1.35253	-0.158746	0.100155	2.17433	-0.292837	-0.308545	0.0246676	-0.361968	-0.49295	-0.82941
23.0313		-1.27984	0.638545	2.65186	0.139416	0.865561	-0.422708	0.205328	0.368969	0.796481	-0.824759	-0.276831	-0.601892	-0.199959	-0.787871	-0.0529735	-1.03478	-0.974811	-1.24956	2.87432	0.216366	1.16424		0.606899	-0.354909	-0.160798	-0.161912	0.819042	0.0584115	-0.298949	-0.254255	0.0279132	1.3377	-0.513911	1.03503	0.0855619	0.463723	-0.182754	0.092476	-1.36308	-0.215364	0.0773347	1.98232	-0.246384	-0.298604	0.0396215	-0.570104	-0.44102	-0.79929
23.0815		-1.30548	0.502196	2.66678	0.143242	0.867401	-0.557089	0.218942	0.324588	0.753394	-0.896186	-0.353534	-0.625735	-0.160807	-0.690351	-0.0164907	-1.03134	-1.10251	-1.27185	3.05613	0.328547	1.05294		0.65168	-0.268237	-0.206283	-0.198518	0.82618	0.0457345	-0.353831	-0.349021	-0.00206019	1.27303	-0.574013	0.969275	0.0403371	0.505624	-0.23983	0.18728	-1.31138	-0.173628	0.0472106	1.87881	-0.15874	-0.17628	-0.0732898	-0.595088	-0.46391	-0.74236
23.1317		-1.33048	0.463796	2.54305	0.22059	0.837039	-0.614759	0.277667	0.265888	0.702785	-0.988918	-0.400371	-0.561993	-0.129271	-0.674564	-0.143887	-0.987032	-1.19509	-1.36769	3.1395	0.284385	0.930351		0.600555	-0.213107	-0.31012	-0.310989	0.721911	0.0424638	-0.373319	-0.408178	0.041827	1.3521	-0.700411	0.894742	0.0197287	0.537865	-0.293291	0.207436	-1.26728	-0.03905	-0.0222477	1.84905	-0.178135	0.019156	-0.172353	-0.428586	-0.49594	-0.65013
23.1818		-1.40653	0.576249	2.35987	0.276137	0.801271	-0.673904	0.340236	0.239562	0.667329	-1.12149	-0.425009	-0.507649	-0.122767	-0.632448	-0.374468	-0.917948	-1.21723	-1.46455	3.07025	0.106513	0.790611		0.454681	-0.23177	-0.365021	-0.436804	0.608253	0.0521724	-0.433506	-0.437645	0.104656	1.46195	-0.745136	0.819153	0.063915	0.512018	-0.322711	0.124147	-1.18149	0.108622	-0.101982	1.78942	-0.250783	0.105352	-0.107248	-0.268428	-0.48048	-0.53232
23.232		-1.4755	0.767321	2.23314	0.246551	0.737545	-0.789285	0.373696	0.25881	0.66629	-1.26626	-0.442269	-0.500345	-0.154657	-0.471481	-0.525311	-0.839722	-1.22287	-1.51107	2.91777	-0.0509574	0.677201		0.357918	-0.280576	-0.404317	-0.445768	0.616848	0.0399205	-0.547144	-0.454598	0.141069	1.44906	-0.685079	0.776921	0.154488	0.450309	-0.321732	0.0412767	-1.03904	0.200429	-0.131891	1.67595	-0.210369	0.0437801	0.0184757	-0.225734	-0.42832	-0.41014
23.2822		-1.45746	0.908669	2.17269	0.182173	0.626653	-0.904476	0.39129	0.289987	0.689338	-1.35426	-0.43853	-0.45607	-0.180869	-0.261262	-0.506175	-0.743888	-1.27118	-1.53482	2.76749	-0.109203	0.634364		0.414076	-0.314831	-0.504864	-0.350799	0.721558	-0.0113045	-0.665083	-0.449271	0.160546	1.35389	-0.617744	0.748277	0.227504	0.405378	-0.300075	0.0564739	-0.943738	0.237822	-0.127348	1.60321	-0.0752853	0.0103437	-0.00774325	-0.186211	-0.36413	-0.28936
23.3324		-1.37588	0.93197	2.10968	0.125189	0.507055	-0.964436	0.420126	0.300317	0.703321	-1.36334	-0.419318	-0.364529	-0.150907	-0.15225	-0.391406	-0.619671	-1.36344	-1.58624	2.61981	-0.139882	0.624841		0.54119	-0.37796	-0.617652	-0.286964	0.798862	-0.0722755	-0.762823	-0.424011	0.168851	1.32462	-0.560545	0.677137	0.253336	0.390649	-0.269609	0.0864057	-0.963239	0.283987	-0.188322	1.64489	-0.0314105	0.114118	-0.199258	0.00229126	-0.26935	-0.16455
23.3825		-1.32004	0.859181	2.00708	0.0353718	0.434746	-1.00105	0.462449	0.291367	0.695153	-1.3612	-0.458118	-0.369404	-0.0713417	-0.204921	-0.285072	-0.47631	-1.46629	-1.6347	2.4581	-0.22456	0.565975		0.595242	-0.506276	-0.614944	-0.330319	0.786616	-0.113791	-0.858727	-0.423545	0.138181	1.34679	-0.426029	0.564237	0.274037	0.375227	-0.222472	-0.0137848	-1.01515	0.368059	-0.357708	1.75362	-0.129471	0.239745	-0.383559	0.317854	-0.11178	-0.04704
23.4327		-1.32977	0.756396	1.8792	-0.101209	0.411167	-1.04237	0.510928	0.280373	0.687178	-1.41033	-0.608554	-0.543344	0.0253125	-0.358485	-0.22702	-0.332125	-1.55659	-1.58256	2.33681	-0.341366	0.451469		0.578099	-0.620367	-0.490989	-0.449419	0.709201	-0.126432	-0.958175	-0.478951	0.0708644	1.25755	-0.199681	0.46878	0.338503	0.337213	-0.147535	-0.197247	-0.983644	0.403224	-0.536781	1.81961	-0.210198	0.2608	-0.449106	0.597519	0.091989	0.037966
23.4829		-1.38143	0.689605	1.74278	-0.192317	0.385693	-1.03793	0.578737	0.272789	0.695932	-1.47196	-0.780626	-0.732378	0.125991	-0.523084	-0.22358	-0.206284	-1.62713	-1.39757	2.29716	-0.417947	0.356692		0.617571	-0.630012	-0.402714	-0.589063	0.619336	-0.093539	-1.04036	-0.551878	0.0312895	1.02004	0.00362746	0.406566	0.426403	0.290231	-0.0705918	-0.279602	-0.854333	0.282255	-0.601747	1.77054	-0.164848	0.231173	-0.426083	0.721346	0.277554	0.088556
23.5331		-1.44599	0.68604	1.61451	-0.139787	0.322778	-0.956994	0.682045	0.26415	0.701148	-1.47167	-0.817925	-0.751817	0.207721	-0.641218	-0.247285	-0.131781	-1.67775	-1.16986	2.25148	-0.420813	0.308416		0.771541	-0.591373	-0.465655	-0.700722	0.574252	-0.020598	-1.10002	-0.578699	0.0664899	0.793657	0.0867627	0.330334	0.474212	0.25069	-0.0401655	-0.228985	-0.679755	0.0590863	-0.54428	1.59849	-0.0830785	0.249787	-0.37679	0.721415	0.399471	0.139421
[truncated: 1,332 more rows]
[truncated: 28 more columns]

## Sheet: 2F
	Full										Part
Males	-0.325281	-0.23445	0.689789*	0.507604*	0.13811	0.380604	0.186258	0.836559	0.907667		0.166652	0.482962	1.85821	0.618495	0.931175	1.05155	0.659588	0.629417	0.82069
Females	-0.04157304*	-0.267818	0.515285	-0.210036	0.375808	0.260456	0.0716785	-0.314525	-1.63543		-0.603588	0.428558	0.104729	0.310134	0.197387	0.264091	0.284546	0.155909	-0.03908	0.193184

## Sheet: 2G
	Full Tone 3											Part Tone 4
[truncated: 2 more rows]

[truncated: 10 more sheets: 2H, 2I, 2J, 2K, 2L, 2M, 2N, 2O, 2P, 2Q]
