# Supplementary material for: Sex differences in BNST signaling and BNST CRF in fear processing
Source: eLife. 2025 Dec 5;12:RP89189. doi: 10.7554/eLife.89189 (PMC12680374; doi:10.7554/eLife.89189)
Supplement: Figure 3—source data 1. [file elife-89189-fig3-data1.xlsx]

## Sheet: 3D
	Full													Part
GFP	6.75779	27.7837	27.5779*	27.2178	34.4151	15.5938	34.465	32.03704*	22.3413	40.5879	53.4347	78.2231*		22.2009	16.7313	51.0729	55.6606	27.3104	67.2818	46.1978	42.0106	29.2299	27.4699	47.9571
Cre	9.41946	12.6749	25.338	24.8442	19.6414	42.5	23.5905	14.6546	43.8081	25.0617				38.8889	16.7313	38.7103	60.1396	44.8133	48.4935	56.796	54.3754	2.80276	45.3983

## Sheet: 3E
	Full													Part
GFP	9.76191	46.5476	18.80952*	31.5476	54.4048	37.9762	79.0476	60.35714*	55	69.5238	60.4762	85.11905*		18.6905	18.5714	54.7619	61.7857	15.4762	89.7619	67.6191	68.9286	21.4286	36.0714	64.7619
Cre	20.4762	31.0714	64.5238	29.7619	44.0476	74.8809	49.1667	31.7857	67.9762	47.2619				50	18.5714	65	69.5238	73.5714	45.5952	51.1905	68.5714	32.2619	38.5714

## Sheet: 3F
	Tone 3												Tone 4												Tone 5
GFP	16.4286	17.8571	63.4524	75.4762	28.0952	84.7619	46.3095	20	45.9524	27.0238	62.2619		18.6905	18.5714	54.7619	61.7857	15.4762	89.7619	67.6191	68.9286	21.4286	36.0714	64.7619		31.1905	16.1905	65.9524	82.7381	45.2381	100	81.7857	62.0238	44.0476	33.3333	56.6667
Cre	36.0714	17.8571	19.8809	72.7381	35.1191	59.0476	41.0714	78.2143	18.2143	28.2143			50	18.5714	65	69.5238	73.5714	45.5952	51.1905	68.5714	32.2619	38.5714			58.4524	16.1905	67.7381	88.2143	60.8333	74.8809	81.6667	65.7143	4.40476	58.4524

## Sheet: 3G
	Full													Part
GFP	15.4074	22.8518	23.7963*	50.5185	31.0556	37.7963	36.4074	45	34.2407	63.6111	30.8704	10.83333*		35.6296	29.7037	22.5185	5.68518	17.6667	55.3704	48.6852	45.6667	35.8148	39.2037	7.53704
Cre	7.57407	17.4444	18.5926	39.3704	43.1852	43.4259	41.8333	31.6111	33.1111	11.0556				18.4259	34.037	29.5185	23.8333	29.2037	38.5	10.5741	28.6852	15.7222	29.1296

## Sheet: 3H
	Full													Part
GFP	69.0123	62.2222	70.6173	91.7284	51.7284	91.7284	78.2716	90	80.9877	74.8148	68.8889	38.3951		64.9383	70.4938	73.0864	84.5679	66.0494	100	89.6296	71.6049	63.2099	50.6173	80.9877
Cre	52.4691	52.8395	87.5309	81.6049	52.4691	82.4691	47.2839	81.8518	78.5185	64.1975				57.5309	76.6667	69.6296	79.1358	75.4321	88.3951	74.8148	78.2716	46.7901	73.5803

## Sheet: 3I
	Full												Part
GFP	23.94474*	4.4371	4.24603	15.4762	15.8524	23.8345	13.3671	39.49882*	48.4318	33.0541	47.9703		27.8248	32.5794	23.2716	20.5445	41.5822	48.06437*	60.9186	55.2308	37.8057	65.7613
Cre	13.9638	16.4712	23.28189*	17.0076	10.5938	36.0097	12.1532	29.9104	45.2454	49.3915			37.9564	60.7304	21.66667*	33.6655	31.9988	62.4831	57.5816	45.0669	66.965	54.4173

## Sheet: 3J
	Full												Part
GFP	28.57143*	2.73809	10.4762	20	32.0238	39.0476	32.8571	53.4524	85.4762	59.1667	79.5238		32.0238	37.8571	50	33.6905	66.3095	95.7142857142857*	67.7381	71.5476	71.1905	54.2857
Cre	5.83333	0.47619	32.38095*	44.0476	16.0714	62.8571	31.3095	62.8571	86.0714	78.4524			68.4524	61.5476	52.2619*	52.6191	83.2143	79.7619	57.6191	47.6191	72.9762	67.2619

## Sheet: 3K
	Tone 3												Tone 4												Tone 5
GFP	26.3095	45	11.1905	20.8333	40.9524	82.7380952380952*	77.5	58.4524	20.9524	51.6667			32.0238	37.8571	50	33.6905	66.3095	95.7142857142857*	67.7381	71.5476	71.1905	54.2857			12.1429	81.1905	37.7381	41.6667	42.9762	68.21429*	65.2381	88.2143	49.1667	93.5714
Cre	39.5238	83.0952	31.90476*	43.6905	70	67.1429	61.3095	49.5238	77.7381	61.1905			68.4524	61.5476	52.2619*	52.6191	83.2143	79.7619	57.6191	47.6191	72.9762	67.2619			69.1667	94.6429	32.7381*	54.2857	20.5952	90.8333	91.7857	77.0238	92.0238	71.0714

## Sheet: 3L
	Full												Part
GFP		14.7963	4.59259	17.0926	8.51852	17.4074	46.537	56.01852*	47.7407	21.1111	27.7407		3.68519	9	16.5926	8.05556	15.1852	38.01852*	19.2778	36.3518	23.7037	19.8148
Cre	29.6111	30.7963	12.7778	34.5185	11.7963	28.0185	24.2407	33.6852	20.4444	24.6296			16.1482	34.0556	42.0185	14.0556	30.7407	55.7593	52.4815	46.7222	52.4074	36.2222

## Sheet: 3M
	Full												Part
GFP	65.92593*	77.1605	41.358	56.6667	57.2839	68.1482	58.2716	53.08642*	55.4321	75.9259	74.6914		62.8395	51.1111	52.2222	20.9876	87.4074	80.74074*	74.321	78.8889	60.2469	72.5926
Cre	77.284	89.0123	53.58025*	34.8148	65.3086	65.5556	59.8765	62.8395	71.7284	72.0988			75.679	81.1111	62.71605*	80.1235	55.4321	82.5926	72.3457	86.0494	92.2222	90.2469
