# Supplementary material for: Sex differences in BNST signaling and BNST CRF in fear processing
Source: eLife. 2025 Dec 5;12:RP89189. doi: 10.7554/eLife.89189 (PMC12680374; doi:10.7554/eLife.89189)
Supplement: Figure 4—source data 1. [file elife-89189-fig4-data1.xlsx]

## Sheet: 4 B,C
GFP M CTRL	Cre M CTRL	GFP F CTRL	Cre F CTRL	GFP M Part	Cre M Part	GFP F Part	Cre F Part	GFP M Full	Cre M Full	GFP F Full	Cre F Full
600	569	594	600	127	171	276	210	158	72	136	69*
214	367	600	600	326	225	138	260	123	203	48	93
238	600	215	173	348	157*	490	600	316	102	200	204
328	257	70	600	598	142	600	106	190	82	212	211
396	307	252*	600	144	96*	145	113	93	142	112	366*
600	353	558	197	600	600*	67	161	68	457*	97	102*
600	478	221	352	148	367*	100	166	55	119*		88*
209	218	116	176	70*	62	57	247	82	172		64
158					76		151		147		452
					166				140		183
					289				174		162
					65				186		555
					161						132
					158

## Sheet: 4 D,E
GFP M CTRL	Cre M CTRL	GFP F CTRL	Cre F CTRL	GFP M Part	Cre M Part	GFP F Part	Cre F Part	GFP M Full	Cre M Full	GFP F Full	Cre F Full
0.38	0	0.06	0	0.17	0.19	0.21	0.25	0.2	0.19	0.27	0.23*
0.44	0.4	0.23	0.35	0.22	0.15	0.17	0.12	0.19	0.26	0.19	0.19
0.15	0.09	0.15	0.29	0.35	0.21*	0.21	0.16	0.22	0.25	0.25	0.2
0.12	0	0.26	0.18	0.01	0.23	0.14	0.29	0.16	0.33	0.26	0.12
0.17	0.23	0.19*	0.01	0.3	0.27*	0.21	0.32	0.39	0.16	0.31	0.3*
0	0.17	0.32	0.24	0.22	0.23*	0.17	0.22	0.27	0.3*	0.34	0.36*
0	0.24	0.24	0.25	0.33	0.21*	0.21	0.35	0.28	0.29*	0.28	0.26*
0.25	0.17	0.2	0.17	0.32*	0.27	0.24	0.26	0.31	0.23		0.33
0.27					0.16		0.3		0.3		0.33
					0.28				0.23		0.31
					0.34				0.26		0.22
					0.32				0.16		0.28
					0.45						0.24
					0.45

## Sheet: 4F
	GFP M										Cre M									GFP F									Cre F
90 dB	192	445.8	300.1	465.5	942	75.2	235.1	136.4	185.3		94.2	135.7	171.1	93.2	149.9	196.5	54.5	206.8		199.2	84.4	113	143	164.6*	120.9	382.2	187.5		259	297	107.8	79.1	94.2	170.1	448.1	309.4
105 dB	284.7	752	742.3	826.3	813.8	272.4	525	426.5	791.6		472.7	387.5	514.1	1122	468.6	269.1	896.2	516.6		529.2	493.8	788.2	857.8	355.7*	222.8	553.9	706.6		458.8	444.1	832.6	296.2	878.1	386.5	644.4	573.9
120 dB	351.1	646	444.4	1405.4	799.8	484.3	334.9	1066	1466		305.2	674	500.7	1789.5	962	317.6	2097.6	270.6		723.6	569.9	1303.9	1821	468.3*	331.1	310.1	724.2		545.2	473.2	1510.1	822.3	2017	344.2	321.9	718.8

## Sheet: 4G
	GFP M										Cre M													GFP F								Cre F
90 dB	105.3	124.2	258.5	140.7	198	175.9	247	272.2			265.9	229.3	121.4	196.5	176.4	114.8*	108.5*	256.8	490.1	283.5	361.8	260.6		98	124.3	271.2	163.6	127.2	200.1	201		129.4*	354.6	93.6	179.8	115.4*	142.8*	423.7*	284.7	312.7	336.9	184.6	155.7
105 dB	741.7	365.1	327.6	427.2	969.7	410.3	1867.4	817.8			997.3	696.4	1163.7	1828.9	963.3	338.7*	592.2*	1007.9	1239.6	1345.6	1855.1	2049.8		608.4	277.2	713.1	578.6	1009.5	1374.8	935.7		700.8*	1848.5	645.3	1514.5	807.2*	775.6*	1487.6*	620	308.4	1320.5	516.6	242.5
120 dB	2203.3	1127.8	812.9	1478.8	1584	1099.4	2344.6	1351.4			1955	1918.7	2004.6	2228.2	2298.8	738.1*	1095.3*	901.7	1738.6	2738.2	2454.9	2633		1316.5	757.2	1399.5	1378.8	1186	1527.6	1382.1		1099.2*	2340.9	1295.7	2052.7	899.1*	1248.4*	1585.6*	516.6	510.7	1089	1079	556

## Sheet: 4H
	GFP M									Cre M															GFP F									Cre F
90 dB	139.2	115.3	173.7	165.2	187.7	337.8	166.8	112.1*		186.7	166.2	357.7*	185.9	79*	81.1*	86*	258.8	462.2	125.4	109.4	420	203.8	248.4		193.2	173	153.4	142.2	291.2	140.4	166.9	383.9		253.5	236	144.3	170.9	191.2*	276.9*	429.4	232.7	284.3
105 dB	990.1	893.5	427.8	1245.5	650.9	657.2	2061.8	1727.6*		824.2	479.9	1157*	1414.1	1378.3*	394.2*	467.3*	1592.8	1413.8	827.8	725.4	1189.5	394.9	1480		833.6	407.7	642.3	345.9	1182.7	412.6	366.3	1128.4		445.9	919.1	362	673.7	1501.2*	594.2*	666.7	1046	593.4
120 dB	2090.6	1738.6	633.3	1998.4	1839.7	1045.5	2556	2446.6*		1798	1778.2	2968.5*	2818.9	2647.8*	2448.3*	1316.1*	1345.8	1703.9	767.4	1362.3	2008	263.7	1756.8		1534.4	882	1015.4	500.8	2388	536.4	543.4	1807.2		1382.3	1606.6	434.2	1513	2183.4*	469*	995.9	1573	790.9

## Sheet: 4I
	Ctrl											Full														Part
GFP	351.1	646	444.4	1405.4	799.8	484.3	334.9	1066	1466			2203.3	1127.8	812.9	1478.8	1584	1099.4	2344.6	1351.4							2090.6	1738.6	633.3	1998.4	1839.7	1045.5	2556	2446.6*
Cre	305.2	674	500.7	1789.5	962	317.6	2097.6	270.6				1955	1918.7	2004.6	2228.2	2298.8	738.1*	1095.3*	901.7	1738.6	2738.2	2454.9	2633			1798	1778.2	2968.5*	2818.9	2647.8*	2448.3*	1316.1*	1345.8	1703.9	767.4	1362.3	2008	263.7	1756.8

## Sheet: 4J
	Ctrl										Full														Part
GFP	723.6	569.9	1303.9	1821	468.3*	331.1	310.1	724.2			1316.5	757.2	1399.5	1378.8	1186	1527.6	1382.1								1534.4	882	1015.4	500.8	2388	536.4	543.4	1807.2
Cre	545.2	473.2	1510.1	822.3	2017	344.2	321.9	718.8			1099.2*	2340.9	1295.7	2052.7	899.1*	1248.4*	1585.6*	516.6	510.7	1089	1079	556			1382.3	1606.6	434.2	1513	2183.4*	469*	995.9	1573	790.9
