# Supplementary material for: Sex differences in BNST signaling and BNST CRF in fear processing
Source: eLife. 2025 Dec 5;12:RP89189. doi: 10.7554/eLife.89189 (PMC12680374; doi:10.7554/eLife.89189)
Supplement: Figure 5—source data 1. [file elife-89189-fig5-data1.xlsx]

## Sheet: 5B
	Excited										Inhibited
Time	2	6	12	59	4	5	15	3	0		0	1	39	40	11	14	16	19	21	53
-19.984	4.55639	0.120886	-2.8561	-7.51136	-12.8533	-14.5997	-18.323	-21.2371	-24*		-30.3713	-34.1052	-34.2945	-36.4818	-39.9516	-43.7023	-46.4684	-48.2388	-52.2749301087525*	-55.6555606484018*
-19.7842	4.31694	-1.1722	-3.42237	-8.0255	-13.0767	-15.1119	-18.6255	-21.1955	-24*		-30.6037	-33.2896	-34.431	-36.5763	-40.0886	-44.1382	-46.6338	-48.8286	-52.2139601442605*	-56.0852026669934*
-19.5843	2.96846	-1.42712	-3.85027	-7.8647	-13.1021	-14.9094	-18.6414	-21.2568	-24*		-30.1898	-33.2094	-34.669	-37.1608	-40.215	-44.4882	-46.6441	-49.6341	-52.3130000593102*	-55.8809777825463*
-19.3845	2.42173	-2.14389	-4.04446	-8.09882	-12.9102	-15.0173	-18.5677	-21.3682	-24*		-30.4308	-33.3485	-34.6286	-37.0302	-40.2232	-45.0343	-46.8894	-49.5282	-52.5618428465905*	-56.3869940715805*
-19.1846	1.23193	-2.68948	-4.3982	-8.06754	-12.9827	-15.1192	-18.791	-21.0513	-24*		-29.3987	-30.5681	-34.6844	-37.6864	-40.3203	-44.304	-47.0344	-50.2091	-52.6436994376531*	-56.7065173279743*
-18.9848	1.68465	-2.78398	-4.67854	-8.44652	-12.6803	-14.9269	-18.7734	-20.9237	-24*		-29.168	-30.2058	-34.994	-37.6352	-40.5387	-45.1847	-47.1548	-50.29	-52.8975142235583*	-57.2188611100928*
-18.785	0.660753	-3.27307	-4.83259	-8.52628	-12.9588	-14.9364	-19.0096	-20.9301	-24*		-29.0855	-30.4468	-35.2115	-37.5288	-40.6109	-45.6084	-47.3746	-50.4453	-52.9477965071796*	-57.6417458920252*
-18.5851	0.591384	-2.40688	-4.82717	-8.73282	-12.9499	-14.3904	-18.9254	-21.3761	-24*		-29.66	-32.3689	-34.9921	-37.936	-40.5937	-45.9229	-47.134	-50.4714	-52.7586711115718*	-57.2790765232458*
-18.3853	0.368866	-2.11763	-4.84826	-8.24221	-12.8304	-14.6047	-19.0004	-21.375	-24*		-30.1877	-33.3193	-34.5017	-37.3014	-40.6132	-44.8934	-47.1418	-50.5695	-52.5737982158014*	-56.2839767685074*
-18.1854	0.379227	-2.5415	-4.98599	-8.40861	-13.0354	-14.5459	-19.0245	-21.4564	-24*		-29.9519	-34.1127	-34.8708	-36.992	-40.5191	-44.9048	-47.26	-50.678	-52.6587796888533*	-56.7534538071977*
-17.9856	-0.198651	-3.29845	-4.9421	-8.37753	-12.7056	-14.4647	-19.1365	-21.6295	-24*		-30.35	-34.4435	-34.5339	-38.1429	-40.5915	-45.0491	-47.234	-50.7221	-52.6586486876735*	-56.4969917976526*
-17.7858	-0.257907	-2.45171	-4.31233	-8.35077	-12.6226	-14.5161	-19.2608	-21.397	-24*		-30.3906	-34.2525	-34.304	-37.5202	-40.1966	-44.1648	-46.9886	-50.7682	-52.6345736939264*	-55.6107523382308*
-17.5859	1.15484	1.16595	-3.88694	-7.76341	-12.6215	-14.4562	-19.2037	-21.1849	-24*		-30.1982	-33.5962	-34.007	-36.0215	-39.3274	-43.4635	-46.1795	-49.5664	-51.0345000910448*	-55.5481960222658*
-17.3861	1.00397	-0.971034	-3.76439	-7.44354	-12.6549	-14.8482	-19.2453	-19.5763	-24*		-26.7438	-30.8508	-33.6062	-37.0244	-39.4108	-42.4755	-45.6775	-49.0492	-51.4192253636477*	-55.318993510015*
-17.1862	1.33292	-1.24758	-3.93897	-7.69618	-12.6598	-14.9879	-19.1745	-17.7201	-24*		-24.7752	-29.6319	-34.0581	-36.7348	-39.6251	-43.936	-46.4324	-49.3088	-51.7357685529587*	-56.0600719326481*
-16.9864	0.908411	-1.97449	-4.4901	-8.00701	-12.6792	-14.4947	-19.4222	-18.5697	-24*		-27.2423	-31.7657	-34.3611	-36.9758	-39.9102	-44.2115	-46.5215	-49.8514	-52.4049084716706*	-56.1605524658127*
-16.7866	0.0500028	-2.59608	-4.6246	-8.31194	-13.0036	-14.6505	-19.3583	-17.5071	-24*		-25.6875	-29.6873	-34.736	-37.0883	-40.191	-44.7027	-47.0257	-49.8299	-52.573655122205*	-56.8787468649129*
-16.5867	0.260626	-2.03439	-4.69947	-8.57529	-12.4355	-14.7981	-19.0932	-17.6024	-24*		-26.6942	-30.3264	-34.5681	-37.9807	-40.4026	-44.2045	-46.9727	-50.0704	-52.7991948149977*	-56.9547098382088*
-16.3869	-0.229194	-2.19041	-4.87754	-8.30832	-12.8211	-14.5508	-19.1444	-18.2839	-24*		-28.6182	-32.243	-34.7663	-37.8211	-40.5275	-45.0058	-47.2475	-50.7501	-53.0279732600362*	-57.5825308382941*
-16.187	0.145741	-1.83642	-5.11343	-8.30445	-12.9876	-14.6297	-19.1452	-18.4847	-24*		-29.6166	-32.3469	-35.0641	-37.2632	-40.4464	-45.8458	-47.5217	-51.2204	-53.0355297103988*	-57.986763941376*
-15.9872	-0.38823	-2.40135	-5.18642	-8.33561	-13.0838	-14.5418	-19.1283	-18.9784	-24*		-30.2325	-33.23	-34.6853	-38.305	-40.7836	-45.0555	-47.3147	-51.0506	-52.8953144114387*	-57.5483080222226*
-15.7874	-0.602466	-2.49991	-5.13733	-8.90435	-13.5411	-14.5297	-19.1031	-19.2425	-24*		-30.3236	-33.4799	-35.1468	-38.1594	-41.0526	-45.237	-47.599	-51.1351	-53.4111654157547*	-57.8036141902179*
-15.5875	-0.636445	-2.98407	-5.2711	-8.78405	-13.4514	-14.6752	-19.0132	-19.5566	-24*		-30.4523	-33.023	-35.2063	-38.3615	-41.1927	-45.1819	-47.4984	-51.2395	-53.2285699251103*	-58.1223710824477*
-15.3877	-0.726451	-3.03805	-5.36469	-9.0695	-13.4322	-14.7704	-19.23	-19.9258	-24*		-30.345	-33.4211	-35.2365	-38.164	-41.0786	-45.3327	-47.6233	-51.2879	-53.3528130563758*	-58.3617692550742*
-15.1878	-1.10331	-3.55836	-5.35763	-9.05739	-12.3902	-15.5641	-18.8418	-20.1745	-24*		-30.423	-33.64	-35.3425	-38.523	-41.2083	-44.9703	-47.9278	-51.5879	-53.745755327598*	-58.570716330114*
-14.988	1.35942	-3.05357	-5.53182	-9.0127	-12.593	-14.8037	-18.4665	-20.4262	-24*		-30.687	-33.6281	-35.629	-37.7812	-41.1797	-45.3614	-48.3115	-51.9255	-53.6375666932301*	-58.5009382315744*
-14.7882	-0.863575	-2.55325	-5.51025	-9.24605	-12.9905	-14.9909	-18.5685	-20.4441	-24*		-30.698	-33.2194	-35.5558	-38.1654	-41.4044	-45.5583	-48.3264	-51.4797	-53.9187817564461*	-58.7216147643318*
-14.5883	-0.701195	-2.30098	-5.54225	-9.06031	-13.0732	-14.8536	-18.3893	-20.4728	-24*		-30.3198	-33.5785	-35.5538	-38.5842	-41.5093	-45.5061	-48.216	-51.4837	-53.8918669896618*	-58.9900251418788*
-14.3885	-0.932985	-2.3939	-5.62306	-9.17032	-12.6701	-14.8977	-18.2448	-20.5555	-24*		-30.3434	-33.2381	-36.1287	-37.9005	-41.5748	-45.6873	-48.4188	-51.7473	-54.2265043642403*	-59.1309211696724*
-14.1886	-0.477573	-2.65277	-5.73762	-9.10841	-12.8348	-15.1878	-18.2271	-20.6589	-24*		-30.5455	-33.3578	-36.1351	-37.9124	-41.6313	-46.0763	-48.3534	-51.8591	-54.1477910961026*	-59.1634916466419*
-13.9888	-0.698572	-2.68296	-5.63726	-9.14596	-12.928	-15.2204	-18.2921	-20.8379	-24*		-30.7136	-33.2396	-35.7689	-38.3014	-41.7659	-46.3587	-48.5201	-51.5912	-54.1642644944652*	-59.1080157658621*
-13.789	-0.444962	-2.79956	-5.6797	-9.05553	-13.4641	-14.6498	-18.0619	-20.8751	-24*		-30.1753	-33.3347	-35.79	-38.4974	-41.7078	-45.9958	-48.5455	-51.955	-54.0850815669437*	-58.9278322906289*
-13.5891	-0.976212	-2.73656	-5.68054	-8.75401	-12.8278	-14.4167	-17.4164	-20.9232	-24*		-30.7144	-33.1344	-35.7962	-38.2406	-41.8216	-45.3807	-48.5798	-51.921	-54.1800819799974*	-58.4691089375533*
-13.3893	-1.53646	-2.48688	-5.64643	-9.04132	-13.3843	-14.2384	-17.2563	-21.0726	-24*		-30.306	-33.3765	-36.059	-38.2854	-41.9818	-45.94	-48.6818	-51.6251	-54.1098231249249*	-58.7479588294173*
-13.1894	-1.29161	-2.79858	-5.73592	-9.42298	-13.5701	-13.9889	-17.0716	-21.2302	-24*		-30.2278	-33.5183	-36.1298	-38.7698	-42.0756	-45.9016	-48.4986	-51.6087	-54.4095025323574*	-58.9099013646841*
-12.9896	-1.78741	-1.14651	-4.40986	-9.28246	-13.706	-13.9663	-17.0981	-21.2341	-24*		-30.4927	-33.2482	-35.6591	-37.9465	-41.9094	-44.917	-48.0814	-50.8467	-53.7530357685517*	-57.5011557209772*
-12.7898	-1.02658	-1.84879	-4.78226	-8.35682	-13.7544	-14.3513	-17.161	-21.1248	-24*		-30.2227	-33.2883	-35.5092	-37.5992	-41.9487	-44.6829	-48.113	-50.4697	-53.8282617852826*	-57.2893414319643*
-12.5899	-0.955446	-2.62112	-4.9244	-8.22266	-13.094	-14.543	-16.7802	-21.1796	-24*		-30.7171	-32.9678	-35.2672	-37.7475	-42.1812	-44.2752	-48.1637	-51.0448	-54.1228333559437*	-57.1302329712407*
-12.3901	-0.545143	-2.30262	-5.27414	-8.21589	-13.3454	-14.2522	-17.0487	-21.2105	-24*		-30.6513	-33.263	-35.2686	-37.972	-42.0545	-44.9274	-48.1793	-50.851	-54.0681575446765*	-57.4726789732253*
-12.1902	-0.450857	-2.81238	-5.38072	-8.33384	-13.2217	-14.7148	-16.9346	-21.2222	-24*		-30.5514	-33.3701	-35.6118	-38.0524	-42.1132	-45.4194	-48.2714	-50.5544	-54.0682134418723*	-57.5598716640114*
-11.9904	-0.626252	-2.93597	-5.56184	-8.51156	-13.4879	-14.8923	-17.1295	-21.3155	-24*		-30.2535	-33.6581	-35.6254	-38.1594	-41.9298	-44.9175	-48.2709	-50.9745	-54.022484991033*	-57.8610018241315*
-11.7906	-0.738929	-3.15057	-5.5488	-8.53192	-11.9992	-12.8372	-16.8778	-20.6068	-24*		-29.0333	-31.9521	-35.578	-38.3448	-41.9411	-45.3402	-48.3282	-51.4487	-54.1381915311855*	-57.9423358438041*
-11.5907	-0.247121	-2.30972	-5.56937	-8.58203	-11.8972	-12.8303	-16.3914	-20.6976	-24*		-29.7131	-32.7776	-35.6635	-38.2846	-41.9287	-45.5919	-48.6648	-51.4328	-54.2660158316267*	-58.5012007338687*
-11.3909	-0.610118	-2.84714	-5.69771	-8.64803	-11.661	-13.4164	-16.2496	-20.7561	-24*		-29.9843	-33.0688	-35.6278	-38.5938	-42.048	-45.2919	-48.5243	-51.5465	-54.2351156764108*	-57.9230513087438*
-11.191	0.128749	-2.37237	-5.82464	-8.78379	-10.798	-13.5316	-16.2168	-20.8245	-24*		-29.9822	-33.4555	-35.9779	-37.8617	-41.9772	-46.3431	-48.8693	-51.8603	-54.4168862627028*	-58.3682783617367*
-10.9912	-0.479573	-2.65587	-5.8624	-8.90439	-10.7058	-14.0189	-16.4207	-20.9736	-24*		-30.2044	-33.2523	-35.6073	-38.7018	-42.0451	-45.3898	-48.6033	-51.7495	-54.3891709477087*	-58.203688235457*
-10.7914	-1.28273	-2.43257	-5.73628	-9.06143	-10.8666	-14.4072	-16.2577	-20.9173	-24*		-30.2973	-33.4085	-35.6688	-38.9162	-42.0729	-45.5357	-48.4947	-51.5183	-54.3180997845511*	-57.8469834889433*
-10.5915	-0.455964	-1.46532	-5.60609	-8.92353	-11.3973	-14.5671	-16.4234	-20.5254	-24*		-29.1698	-31.8217	-36.0239	-37.4745	-42.0026	-45.8196	-48.9174	-51.342	-54.4144752363733*	-58.2072587417759*
-10.3917	-0.226739	-2.04014	-5.69715	-9.02631	-11.4834	-14.5544	-16.4207	-20.2825	-24*		-28.7783	-31.955	-35.9345	-38.0177	-42.2252	-45.8027	-48.6377	-51.453	-54.335148882714*	-58.1653576742084*
-10.1918	0.219992	-2.35158	-5.7575	-8.92207	-12.0149	-14.1737	-16.6847	-20.3493	-24*		-29.4939	-32.6747	-35.7903	-37.892	-42.1396	-45.562	-48.7079	-51.5032	-54.3462744098357*	-57.6547044781323*
-9.992	-0.678571	-2.27598	-5.73406	-9.06382	-12.3307	-14.5826	-16.7482	-20.6395	-24*		-30.0505	-33.5009	-35.7372	-38.0037	-42.1842	-45.8016	-48.6821	-51.1929	-54.4390233459199*	-57.7449240222958*
-9.79216	-0.422492	-2.19456	-5.74173	-8.93903	-11.9375	-14.5247	-16.7105	-20.6053	-24*		-30.2154	-33.9633	-35.7798	-38.1452	-42.3016	-46.0805	-48.6438	-51.4731	-54.3129315864668*	-58.0558406480389*
-9.59232	-0.0792429	-2.0308	-5.75203	-9.22574	-12.4211	-14.3688	-16.8443	-20.6729	-24*		-30.3568	-33.7478	-35.9686	-38.0132	-42.1666	-46.1115	-48.8564	-51.3202	-54.470784078117*	-58.1982505182488*
-9.39248	-1.18877	-2.04026	-5.93492	-9.05897	-12.2124	-14.5954	-16.9992	-20.7911	-24*		-30.3968	-33.8124	-35.7662	-38.5393	-42.3425	-46.0465	-48.7543	-51.7512	-54.7388552185717*	-58.4759280582376*
-9.19264	-0.84006	-1.55778	-5.88537	-9.13707	-12.4671	-14.7615	-17.173	-20.8564	-24*		-30.3356	-33.6527	-35.7553	-38.8721	-42.3397	-45.7169	-48.6793	-51.5674	-54.7414662736258*	-58.2925553582983*
-8.9928	-1.37311	-2.03886	-5.96944	-9.16661	-12.0708	-13.485	-17.3245	-20.9669	-24*		-30.0743	-33.4076	-35.7672	-38.6318	-42.3159	-45.887	-48.8469	-51.7191	-54.4505524574456*	-58.4667784873212*
-8.79296	-0.782044	-1.64625	-5.65773	-8.32201	-11.437	-13.8471	-17.3718	-21.1595	-24*		-30.5838	-33.1833	-35.5052	-37.7803	-42.2442	-45.3254	-48.6697	-50.9827	-54.3164929039254*	-57.5119453967256*
-8.59312	-1.03861	0.928991	-3.26104	-7.72212	-9.27397	-13.319	-17.5764	-21.1801	-24*		-30.2577	-33.5643	-34.221	-36.1239	-41.4966	-42.6182	-47.0004	-49.2753	-52.4714580787216*	-56.3170640542924*
-8.39328	-0.699602	0.582883	-3.41994	-7.86796	-9.48633	-13.7564	-17.7256	-21.2646	-24*		-30.3753	-33.4493	-34.4393	-35.9509	-41.4186	-43.1201	-46.7212	-49.2904	-52.5897279592677*	-56.4400735796064*
-8.19344	-0.880554	-0.772909	-4.04385	-8.03568	-9.86669	-13.857	-17.8012	-21.2989	-24*		-30.2417	-33.5128	-34.8059	-36.7661	-41.6719	-43.2736	-46.8477	-49.1626	-52.9106727882208*	-56.6160957401897*
-7.9936	-0.732557	-0.757945	-4.36425	-7.88356	-10.1432	-13.8929	-18.2217	-21.3972	-24*		-30.2716	-33.2244	-34.3194	-37.0801	-41.7163	-43.7737	-47.0012	-49.7708	-53.0383818076238*	-56.6482681876624*
-7.79376	-0.632487	-1.23656	-4.65514	-7.78806	-9.17162	-14.2628	-17.8229	-21.3827	-24*		-29.8912	-33.4394	-34.2144	-37.5171	-41.7906	-43.9781	-47.0406	-50.2543	-53.2691283942339*	-56.7819973089268*
-7.59392	-0.517229	-1.37526	-4.87646	-8.01696	-9.39387	-14.2097	-17.917	-21.3269	-24*		-29.862	-33.2482	-34.4127	-37.8642	-41.7391	-43.8835	-47.016	-50.2415	-53.3100939747164*	-56.9257343360978*
-7.39408	-0.412173	-0.0787416	-5.01061	-8.02882	-9.75392	-14.5582	-17.9129	-21.4226	-24*		-30.5043	-33.5896	-34.4037	-38.5658	-41.7327	-44.7507	-47.4817	-50.6418	-53.2810368045603*	-57.0982872140977*
-7.19424	-1.30318	-1.47429	-5.20892	-8.21729	-9.9443	-14.5176	-17.7988	-21.55	-24*		-30.3636	-33.6029	-34.7438	-38.2152	-41.7396	-44.6864	-47.4634	-50.5061	-53.2655356364923*	-57.0695482372439*
-6.9944	-0.272149	-0.915309	-5.38553	-8.3812	-9.95212	-14.2518	-17.7701	-21.5756	-24*		-30.5029	-33.2512	-34.5939	-38.3043	-41.6895	-44.8679	-47.5253	-50.9453	-53.204413912172*	-57.1473311353824*
-6.79456	-0.79833	-2.44366	-5.24497	-8.41848	-9.98897	-14.648	-17.6736	-21.3087	-24*		-30.0839	-32.4185	-34.8477	-38.4502	-41.7181	-44.96	-47.5034	-50.9824	-53.3929959551939*	-57.4686018731123*
-6.59472	-0.693892	-2.55951	-5.652	-8.6881	-10.1215	-14.4525	-17.3662	-19.9539	-24*		-27.6188	-29.3277	-34.9256	-38.6121	-41.8905	-45.2891	-47.7276	-51.281	-53.4583702801216*	-57.5250209804615*
-6.39488	-0.327206	-2.90931	-5.53008	-8.64216	-10.3984	-14.3582	-17.5104	-20.5157	-24*		-29.1143	-30.9175	-34.9449	-38.7106	-41.8528	-45.47	-47.8575	-51.2616	-53.7609117610228*	-57.7513917937555*
-6.19504	-0.591018	-3.11135	-5.59553	-8.80054	-10.9266	-14.3372	-17.6983	-20.5365	-24*		-29.4327	-32.1279	-35.0542	-39.0837	-41.9261	-45.3577	-47.8599	-51.3371	-53.8479043037254*	-57.7879963727246*
-5.9952	-0.275538	-2.58971	-5.69033	-8.92466	-11.1832	-14.3414	-17.8145	-20.6692	-24*		-29.4652	-32.8479	-35.1419	-38.6734	-41.8971	-45.9586	-48.3175	-51.2429	-53.7686331721018*	-57.7027431106536*
-5.79536	-0.510488	-2.78091	-5.73182	-8.90792	-11.3335	-14.4988	-17.8167	-20.767	-24*		-29.9757	-33.145	-35.286	-38.9539	-41.9338	-45.5977	-48.1644	-51.4835	-54.0174262494729*	-57.8031154358588*
-5.59552	-0.500874	-2.79598	-5.81778	-8.98497	-11.7595	-14.3709	-17.8266	-20.9744	-24*		-30.1395	-33.7153	-35.3534	-39.1008	-41.8605	-45.7971	-48.1238	-51.485	-54.0705511579262*	-58.2198018378263*
-5.39568	-0.486606	-3.03986	-5.7595	-9.12678	-11.919	-14.2234	-17.9607	-21.1266	-24*		-30.3767	-33.337	-35.3866	-38.9244	-41.931	-45.7031	-48.1645	-51.4987	-54.0522361852857*	-58.2955545360944*
-5.19584	-0.240245	-1.60041	-5.82055	-9.06666	-11.39	-13.0921	-18.0353	-21.1924	-24*		-30.3843	-33.537	-35.2259	-38.7212	-42.0398	-45.9048	-48.0278	-51.9014	-53.767876388363*	-57.8401320602844*
-4.996	-1.06834	-1.1794	-5.56105	-8.76167	-10.8941	-12.7283	-18.0226	-21.0225	-24*		-30.4412	-33.6692	-34.5265	-38.4425	-41.8659	-45.3732	-47.573	-51.0941	-54.139087982336*	-56.6477746595934*
-4.79616	-1.25892	-1.95262	-5.64174	-9.03468	-10.9018	-13.2127	-18.0294	-21.1318	-24*		-30.2507	-33.5612	-34.8013	-38.1936	-41.9976	-45.0236	-47.7002	-51.2515	-54.273140784257*	-57.3074729761783*
-4.59632	-0.83543	-2.53131	-5.70322	-9.0739	-9.69457	-12.1596	-17.8805	-21.0732	-24*		-30.2124	-32.9633	-34.5662	-38.5286	-41.9262	-45.3353	-47.5725	-51.3697	-54.0620789387776*	-57.1243155043644*
-4.39648	-0.296879	-2.61489	-5.71836	-9.37023	-9.5871	-12.4519	-17.7748	-21.3408	-24*		-30.5668	-33.6073	-34.9753	-38.4528	-42.2031	-45.7912	-48.0029	-51.2599	-54.2822067712916*	-57.9231172312657*
-4.19664	-0.754085	-3.12664	-5.68549	-9.35641	-10.6472	-12.2632	-17.4382	-21.2853	-24*		-30.2609	-33.0808	-34.9116	-38.5308	-42.2389	-45.7707	-48.0828	-51.5125	-54.4311675074764*	-58.039356691754*
-3.9968	-0.735345	-2.56849	-5.93414	-9.21629	-10.2417	-12.416	-17.2881	-21.4751	-24*		-30.2601	-33.7483	-35.0903	-38.8113	-42.0789	-45.9346	-48.1035	-51.5341	-54.6065283068098*	-57.7502535315448*
-3.79696	-0.368613	-2.81468	-5.93886	-9.16208	-10.4109	-13.222	-17.5508	-21.4831	-24*		-30.3401	-33.379	-35.2292	-38.5727	-42.3675	-46.0705	-48.1208	-51.7514	-54.3295666201313*	-57.9263432775605*
-3.59712	-1.62255	-2.75909	-5.85867	-9.11914	-10.2221	-13.3833	-17.4969	-21.5813	-24*		-30.3051	-33.4846	-35.0111	-38.9768	-42.1557	-46.2148	-48.156	-51.6885	-54.353975666887*	-57.8992371243665*
-3.39728	-0.726489	-2.44872	-5.94838	-9.05714	-10.356	-13.2331	-17.6389	-21.4998	-24*		-30.1221	-33.8277	-35.1987	-38.7428	-42.1698	-45.8787	-48.2632	-51.7899	-54.5174544576703*	-57.9515848330101*
-3.19744	-0.74445	-1.84673	-4.98347	-8.91405	-10.9379	-13.5495	-17.9974	-21.3591	-24*		-30.248	-33.629	-34.9477	-38.199	-41.9459	-45.5334	-47.6915	-51.1011	-54.2995040663052*	-57.0433148032159*
-2.9976	-1.19097	-2.35049	-5.32246	-8.5101	-10.9794	-13.6572	-17.8738	-21.5064	-24*		-30.7243	-33.5132	-34.7501	-38.2316	-42.0144	-45.5821	-47.5442	-51.2838	-54.2554547180498*	-57.360758566322*
-2.79776	-0.669823	-2.04455	-4.62865	-8.01945	-11.0787	-13.8673	-18.1188	-21.4837	-24*		-30.3337	-33.7148	-34.4403	-37.8487	-42.0012	-45.1112	-47.0605	-49.9464	-54.0679927955774*	-55.6267245932109*
-2.59792	-1.0992	-1.77565	-4.92075	-7.71082	-11.4843	-13.7251	-18.1156	-21.5036	-24*		-30.4597	-33.7232	-34.4938	-38.0009	-42.2132	-44.9252	-47.026	-50.1761	-54.2734498462712*	-55.5581806117923*
-2.39808	-0.577409	-2.80459	-5.26417	-7.8731	-11.3995	-14.0984	-18.0408	-21.4863	-24*		-30.3765	-33.5817	-34.6605	-38.1337	-42.2302	-45.3115	-47.0545	-50.3688	-54.2352060672249*	-55.945033924968*
-2.19824	-0.319633	-2.83427	-5.31508	-8.21081	-11.434	-13.8958	-17.8901	-21.3054	-24*		-30.6437	-33.2842	-34.9876	-38.1928	-42.3917	-45.9212	-47.0915	-50.5271	-54.5024730619757*	-56.4498449602558*
-1.9984	-0.213221	-3.20745	-5.49095	-8.25787	-11.5562	-14.0216	-17.8703	-21.4845	-24*		-30.3747	-33.716	-34.9391	-38.4432	-42.1085	-45.5746	-47.4234	-50.6823	-54.2587954496755*	-56.9023148435185*
-1.79856	0.157403	-2.80543	-5.02899	-8.35539	-11.4907	-14.3936	-17.952	-21.5627	-24*		-30.1929	-33.96	-34.6783	-38.0052	-41.873	-45.0865	-47.2967	-50.5209	-54.125344749331*	-56.6730011300696*
-1.59872	1.02981	-0.84676	-3.67633	-7.49869	-11.8976	-13.9367	-18.1273	-21.5176	-24*		-30.3819	-33.919	-34.0618	-36.5649	-41.2482	-44.322	-45.9542	-48.7572	-52.5964845970424*	-55.8385026545317*
-1.39888	0.271294	-1.39954	-4.12848	-7.55495	-11.7175	-14.0773	-17.9873	-21.4306	-24*		-30.5863	-33.6622	-34.2652	-36.8197	-41.3984	-44.4377	-46.014	-48.9242	-52.6611598795206*	-55.9550763600227*
-1.19904	0.363202	-1.81346	-4.49477	-7.74803	-11.8369	-14.3702	-17.9197	-21.5377	-24*		-30.4714	-33.8679	-34.2164	-37.288	-41.6266	-44.7569	-46.5917	-49.0248	-53.1026160192065*	-56.2191183905674*
-0.9992	0.108774	-2.5455	-4.78359	-8.08882	-11.9858	-14.6304	-18.1264	-21.3666	-24*		-30.3581	-33.7195	-34.4267	-37.7527	-41.6164	-44.3958	-46.477	-49.5292	-53.0800944979118*	-56.357299717033*
-0.79936	-0.0566863	-1.8999	-4.86702	-8.16118	-11.8629	-14.0681	-18.0616	-21.1572	-24*		-30.5211	-33.3432	-34.509	-37.9557	-41.4981	-44.1002	-46.4248	-50.1651	-53.3545608136549*	-56.3810256483765*
-0.59952	-0.182128	-1.49229	-4.81869	-8.25602	-11.9647	-14.6364	-18.0129	-21.2757	-24*		-30.2771	-33.1211	-34.5313	-37.9325	-41.592	-44.8954	-46.3931	-50.1006	-53.2245368018642*	-56.8271278673893*
-0.39968	0.938811	-1.90894	-4.91227	-8.58879	-12.0987	-14.5881	-18.2262	-21.3698	-24*		-30.4416	-33.8407	-34.9743	-37.5435	-41.6968	-46.0762	-46.5288	-49.4407	-53.1968966613932*	-56.4485935013545*
-0.19984	0.275804	-2.219	-5.05233	-8.60991	-12.651	-14.4159	-18.3795	-21.2415	-24*		-30.4261	-33.292	-34.9602	-37.6189	-41.6744	-45.5623	-46.8032	-50.2297	-53.3847264553326*	-57.064777109572*
3.55271e-15	-0.191494	-2.92249	-5.17908	-8.7161	-12.583	-14.5529	-18.4011	-21.52	-24*		-30.41	-33.2822	-35.0036	-37.6063	-41.8316	-45.3721	-46.8316	-50.1662	-53.4964732832847*	-57.4790411498706*
0.19984	0.900287	-2.96541	-5.23121	-8.1864	-11.9653	-14.9297	-18.3733	-21.4249	-24*		-30.6722	-33.1569	-35.0158	-38.0629	-41.8315	-44.6144	-47.103	-50.761	-53.4239484101116*	-56.1197164923956*
0.39968	0.411544	-2.53068	-5.30017	-8.08871	-11.1751	-14.893	-17.7731	-21.4026	-24*		-30.5629	-30.8963	-35.1547	-38.225	-41.641	-44.9412	-47.2681	-51.1216	-53.6847949362692*	-56.4784754084461*
0.59952	0.00405975	-2.69761	-5.53339	-8.1771	-11.5309	-14.4568	-17.4554	-21.538	-24*		-30.3277	-31.6016	-35.0765	-38.2114	-41.6198	-45.0411	-47.4777	-51.0531	-53.7651456183845*	-56.8759869086645*
0.79936	-0.0377137	-1.84794	-5.24967	-8.17261	-11.934	-14.7288	-17.226	-21.5883	-24*		-30.5123	-32.3451	-34.858	-37.6805	-41.5401	-44.091	-47.2223	-50.6001	-53.489875459248*	-55.5994492982672*
0.9992	0.55221	-2.02157	-5.29998	-8.0443	-11.701	-14.5265	-16.7091	-21.6303	-24*		-30.5361	-32.9382	-34.8855	-37.4138	-41.36	-43.6496	-47.0623	-50.0047	-53.8224794939753*	-55.4130239698384*
1.19904	0.157107	-2.45137	-5.53178	-8.30618	-11.9442	-14.2371	-16.484	-21.5926	-24*		-30.5546	-33.4928	-34.8101	-37.6832	-41.5687	-44.371	-47.433	-50.2439	-53.8760258231471*	-55.5704196327869*
1.39888	-0.000373058	-2.04667	-5.66266	-8.41017	-12.1337	-14.1439	-16.3471	-21.5003	-24*		-29.7929	-30.8526	-34.9748	-38.0422	-41.7574	-44.3983	-47.4091	-50.1881	-54.0343053181814*	-56.3112844902051*
1.59872	0.0751213	-2.38182	-5.71804	-8.56077	-11.9831	-14.2471	-15.9765	-21.1416	-24*		-29.0505	-31.3067	-35.0695	-38.0734	-41.6019	-44.6793	-47.3722	-50.577	-54.0871841862649*	-56.7330908747034*
1.79856	-0.0881678	-2.73562	-5.81365	-8.55372	-11.9421	-14.277	-15.8516	-18.9714	-24*		-26.024	-29.8305	-35.2354	-38.3853	-41.6213	-44.9108	-47.6546	-50.4338	-54.2632328627166*	-56.9615633692617*
1.9984	-0.463349	-2.86666	-5.75633	-8.606	-12.5179	-14.4521	-15.7946	-19.5035	-24*		-27.8328	-31.8991	-35.2223	-38.5635	-41.632	-45.1291	-47.6073	-51.0029	-53.9875585347093*	-56.9072747827953*
2.19824	0.129124	-2.95653	-5.85034	-8.74004	-12.3395	-14.1106	-15.4875	-19.8696	-24*		-28.7785	-30.9458	-35.1615	-38.7566	-41.7079	-45.448	-47.8967	-50.9497	-54.0318474740456*	-57.044732612553*
2.39808	-0.21363	-3.52547	-6.00017	-8.89605	-12.2013	-14.6553	-15.3054	-20.1498	-24*		-29.4289	-32.0318	-35.6369	-37.932	-41.5984	-45.7028	-47.9212	-51.4022	-54.3363122739609*	-57.5520569350782*
2.59792	-0.585798	-3.09183	-5.96384	-9.08906	-12.1736	-14.5501	-15.2285	-20.5736	-24*		-30.2843	-33.2274	-35.5164	-38.4789	-41.7798	-45.4979	-47.9769	-51.1901	-54.22997912015*	-57.7227440037847*
2.79776	-0.827168	-3.05116	-5.67711	-8.82237	-12.6131	-14.3633	-15.3082	-20.614	-24*		-29.7799	-33.5058	-35.1892	-38.1082	-41.7236	-45.0276	-48.0586	-51.0369	-54.1108583365559*	-56.737952868554*
2.9976	-0.566683	-3.53439	-5.72102	-8.37082	-12.8538	-14.6473	-15.2775	-20.7974	-24*		-30.1164	-33.431	-34.9049	-38.1677	-41.6817	-44.3604	-47.9991	-50.8091	-53.994848363409*	-56.0232710114652*
3.19744	-0.214184	-2.68921	-5.75987	-8.26987	-12.3238	-14.793	-14.9925	-20.9396	-24*		-30.2463	-33.1078	-35.0379	-38.3527	-41.6952	-44.9787	-48.1697	-51.0081	-54.0009635904863*	-56.2092518676836*
3.39728	-0.346088	-3.53894	-5.81231	-8.59778	-12.8562	-14.5329	-15.0706	-20.9625	-24*		-30.1881	-33.3551	-35.1992	-38.4157	-41.8183	-45.0191	-48.1236	-51.0196	-54.0819982727904*	-56.6301959143284*
3.59712	-0.635044	-3.2419	-6.04629	-8.70722	-12.5547	-14.6983	-15.058	-21.2075	-24*		-30.2841	-33.6234	-35.2946	-38.678	-41.9034	-45.1373	-48.0379	-51.1101	-54.3769634516118*	-57.135006118161*
3.79696	-0.545233	-3.57064	-5.99949	-8.42729	-13.1121	-14.9871	-15.5318	-21.3186	-24*		-30.476	-33.8756	-35.2011	-38.6635	-41.7391	-45.3852	-48.2148	-51.519	-54.0906304846876*	-57.0627246385794*
3.9968	-0.254746	-3.3878	-5.92096	-8.56421	-12.7968	-14.7435	-15.3731	-21.0953	-24*		-30.0805	-32.9717	-35.3722	-38.8024	-41.8492	-45.3262	-48.0749	-51.4641	-54.2886520293389*	-57.0951165427212*
4.19664	-0.412635	-2.78581	-6.10425	-8.60369	-12.7414	-14.9681	-15.1958	-21.1365	-24*		-30.1998	-33.5737	-35.427	-39.1857	-41.6511	-45.5428	-48.2537	-51.3929	-54.3734701539966*	-57.1742186158507*
4.39648	-0.151116	-3.13956	-6.06977	-8.62758	-12.7837	-14.9686	-15.3435	-21.4133	-24*		-30.3233	-33.5617	-35.4119	-39.0194	-41.7581	-45.5482	-48.3489	-51.7345	-54.4160843339421*	-57.3239582390357*
4.59632	-0.629361	-3.04652	-6.0863	-8.61568	-12.6219	-14.9382	-15.4231	-21.526	-24*		-30.4548	-33.6744	-35.3379	-39.2246	-41.8473	-45.2646	-48.4863	-51.5235	-54.4618966557675*	-57.5921460241395*
4.79616	-0.311939	-2.61538	-6.04737	-8.70592	-12.405	-15.2776	-15.573	-21.3707	-24*		-30.533	-33.9978	-35.4174	-38.9927	-41.8366	-45.3461	-48.4463	-51.8928	-54.5273004055756*	-57.8278645322533*
4.996	0.081309	-2.84388	-6.14382	-8.7607	-12.6671	-15.3743	-15.7275	-21.4277	-24*		-30.5501	-34.359	-35.4069	-39.2679	-41.8558	-45.2656	-48.6121	-51.6486	-54.3980168527613*	-57.846419405959*
5.19584	0.0419721	-2.72654	-6.08721	-9.05239	-12.888	-15.7954	-15.7786	-21.2306	-24*		-30.6183	-33.997	-35.4608	-39.1114	-41.8776	-45.5114	-48.5205	-51.5772	-54.4398119730224*	-57.9123147273509*
5.39568	-0.79722	-3.0694	-6.22735	-8.95287	-12.8346	-15.4274	-16.02	-21.1679	-24*		-30.3359	-33.8718	-35.4454	-39.2809	-41.7685	-45.6314	-48.3931	-51.8809	-54.3377599377681*	-57.942495720767*
5.59552	-0.651561	-2.61537	-6.16214	-9.0269	-12.9417	-15.5865	-16.4465	-21.1511	-24*		-30.5386	-33.6063	-35.5507	-39.1185	-41.8582	-45.6324	-48.685	-51.7395	-54.6172482341248*	-57.7323426793048*
5.79536	0.257098	-2.41766	-5.85527	-8.72914	-13.1505	-15.1564	-16.6975	-21.1772	-24*		-30.25	-33.1488	-35.402	-38.6199	-41.9487	-44.8183	-48.463	-51.5709	-54.4018701013105*	-55.9614191756391*
5.9952	-0.517337	-2.07058	-5.87554	-8.57976	-12.64	-15.4883	-16.4119	-21.1581	-24*		-30.4899	-33.4801	-35.4673	-38.7497	-41.9098	-45.0042	-48.6754	-51.7993	-54.4790437025048*	-56.0381274535258*
6.19504	-0.0700818	-2.66967	-5.9712	-8.87023	-12.426	-15.6844	-16.2426	-21.2668	-24*		-30.3806	-33.5112	-35.7276	-38.7804	-42.1463	-44.8833	-48.5187	-51.4809	-54.404661333372*	-56.3629350830274*
6.39488	-0.253393	-2.37739	-6.06776	-8.76277	-12.542	-15.7823	-16.1897	-21.3362	-24*		-30.5363	-33.7012	-35.7633	-38.6502	-41.9458	-45.3038	-48.5123	-51.4323	-54.4820999600301*	-56.8082293651147*
6.59472	-0.49931	-2.66241	-6.10093	-8.66662	-12.7508	-15.7536	-16.4449	-21.2506	-24*		-30.4315	-33.5182	-35.7197	-38.9243	-41.9511	-44.9624	-48.5666	-51.4727	-54.243523432902*	-56.7837512043461*
6.79456	-0.316554	-3.05453	-5.99177	-8.75633	-12.7733	-15.8466	-16.5158	-21.3328	-24*		-30.3054	-33.3962	-35.8234	-39.0628	-41.9861	-45.4065	-48.826	-51.2571	-54.3420256384935*	-56.7932333573546*
6.9944	0.0992654	-2.84602	-6.08377	-8.8234	-13.0328	-15.741	-16.543	-21.2317	-24*		-30.3953	-33.7189	-35.8278	-39.217	-42.1126	-45.1206	-48.558	-52.0056	-54.1891557263328*	-57.1247694789203*
7.19424	-0.400923	-2.84178	-5.94259	-9.16228	-12.6977	-16.0267	-16.593	-21.348	-24*		-30.4076	-33.5941	-35.8265	-39.0212	-42.0234	-45.5416	-48.5533	-51.386	-54.4152346401357*	-56.9809071752019*
7.39408	-0.478908	-2.76328	-6.07404	-9.1153	-12.9368	-15.8953	-16.605	-21.185	-24*		-30.39	-33.4727	-35.8514	-38.9844	-41.9587	-45.4493	-48.6501	-51.7035	-54.252896365778*	-57.3868756441295*
7.59392	-0.144479	-2.4985	-5.99074	-9.21063	-12.865	-15.7441	-16.5742	-21.3881	-24*		-30.3557	-33.4491	-35.8787	-38.9592	-41.984	-45.4657	-48.5792	-51.9297	-54.2165427322162*	-57.0405704664479*
7.79376	0.0477052	-2.90904	-6.05221	-9.28837	-12.6888	-15.8909	-16.7091	-21.3784	-24*		-30.2411	-33.5143	-35.7851	-38.7974	-42.1031	-45.311	-48.7367	-51.944	-54.2882082376497*	-56.8030552192146*
7.9936	-0.708841	-1.31333	-4.18919	-8.56291	-12.9239	-15.6783	-16.9544	-21.3093	-24*		-30.1386	-33.2664	-34.9491	-37.9211	-41.7252	-44.3027	-48.2569	-50.4887	-53.8830603849632*	-55.7553245859369*
8.19344	-0.827492	-1.48494	-4.2184	-8.35995	-13.2349	-15.4852	-17.092	-21.4472	-24*		-30.5202	-33.5968	-35.0523	-37.3746	-41.8143	-44.3897	-48.0409	-50.0733	-53.8497940461294*	-55.8875598197104*
8.39328	-0.592016	-2.0436	-4.7029	-8.27889	-13.4365	-15.1981	-17.2366	-21.4587	-24*		-30.4564	-33.6728	-35.423	-37.05	-41.8152	-44.3286	-48.046	-50.4659	-54.1591660293166*	-56.2355193201085*
8.59312	-0.45202	-2.1604	-5.0551	-8.41545	-13.2818	-15.4894	-17.1996	-21.498	-24*		-30.5788	-33.5937	-35.626	-37.3394	-42.0564	-44.8936	-48.1294	-50.387	-54.3174402439958*	-56.8107960674116*
8.79296	-0.436994	-2.41454	-5.25514	-8.23391	-13.2739	-15.6374	-17.4586	-21.2262	-24*		-30.0291	-33.5431	-35.3072	-38.0399	-41.9719	-44.882	-48.1672	-50.3693	-53.9201382736631*	-56.4193810345027*
8.9928	-0.730402	-2.31511	-5.38075	-8.22465	-12.9238	-15.8645	-17.2919	-21.2568	-24*		-30.178	-31.9898	-35.4722	-38.3713	-41.9005	-44.6354	-47.9563	-50.9729	-54.097965331439*	-57.0192156197414*
9.19264	-0.303599	-2.34882	-5.53474	-8.23326	-13.0998	-15.7127	-17.5742	-20.9291	-24*		-29.1505	-31.7701	-35.5749	-38.5496	-42.0081	-44.6472	-48.1629	-50.7917	-54.1593020690034*	-57.1527460469614*
9.39248	-0.5907	-2.98605	-5.52955	-8.37385	-12.8023	-15.8907	-17.3058	-21.1448	-24*		-29.691	-31.9665	-35.6746	-38.7186	-42.0082	-45.0822	-48.1081	-51.117	-54.177652109652*	-57.3621561237854*
9.59232	-0.616005	-2.39455	-5.80127	-8.5451	-12.9164	-15.7458	-17.4201	-21.0004	-24*		-29.8907	-32.6313	-35.5723	-38.7176	-42.1237	-45.8704	-48.3029	-50.9879	-54.2319510909869*	-57.4701955352307*
9.79216	0.0669888	-2.69793	-5.67443	-8.53606	-12.7533	-15.8896	-17.4063	-21.0764	-24*		-30.2255	-33.2321	-35.4598	-38.8791	-42.0402	-45.101	-48.4869	-51.311	-54.3941379078267*	-57.4123039206681*
9.992	-0.728952	-3.07984	-5.6915	-8.27274	-12.8384	-15.9772	-17.4146	-21.2045	-24*		-30.1234	-33.4954	-35.4343	-38.7518	-41.9972	-44.9503	-48.3847	-51.5155	-54.3336879172485*	-57.376324477253*
10.1918	0.379489	-3.12508	-5.6847	-8.57417	-13.3536	-15.691	-17.4961	-21.3201	-24*		-30.5349	-33.3969	-35.3525	-38.9694	-42.0283	-45.146	-48.376	-51.3799	-54.3492029915957*	-57.37800556095*
10.3917	0.0667112	-1.7189	-5.54351	-8.05033	-13.6203	-15.778	-17.7529	-21.3324	-24*		-30.4063	-33.4238	-34.6739	-38.1263	-41.9789	-44.2196	-48.0478	-50.1424	-54.1670852521772*	-55.9372962838126*
10.5915	-0.476407	-1.1641	-5.48506	-7.9029	-13.3205	-15.6458	-17.4827	-21.2596	-24*		-30.2202	-33.425	-34.5096	-37.8511	-41.8976	-43.9427	-47.8875	-50.1777	-53.8932853293588*	-55.4249601035705*
10.7914	-0.536093	-2.31705	-5.60922	-7.86776	-12.8719	-15.7741	-17.2798	-21.3574	-24*		-30.1049	-33.7257	-34.7493	-37.6261	-42.0285	-44.4305	-48.0099	-50.1862	-54.1109609205567*	-55.8801955019536*
10.9912	-0.928703	-2.52178	-5.60954	-7.9424	-13.2145	-15.9591	-17.5052	-21.4656	-24*		-30.3118	-33.9183	-34.7336	-38.1157	-42.0602	-44.2826	-47.9708	-50.2223	-54.2238805113786*	-55.9171526179405*
11.191	-0.316731	-3.2877	-5.78606	-7.67008	-13.1759	-15.8415	-17.4925	-21.2431	-24*		-30.2557	-33.6704	-34.5638	-38.4366	-42.1076	-44.8677	-48.0958	-50.7487	-54.312892386883*	-56.0352540630282*
11.3909	-0.423457	-2.77476	-5.79982	-7.57727	-13.1734	-15.8847	-17.475	-21.4158	-24*		-30.4115	-33.7687	-34.794	-38.471	-42.105	-45.049	-47.9791	-50.7101	-54.3397398694459*	-56.6844298385523*
11.5907	0.171657	-2.75935	-5.70995	-7.9599	-13.0135	-16.0193	-17.2798	-21.3618	-24*		-30.2814	-33.3232	-35.1102	-38.4833	-42.1807	-45.5973	-48.0052	-50.8228	-54.2182135011096*	-56.9031225785192*
11.7906	-0.230713	-2.4356	-5.85907	-8.11776	-13.6373	-15.5907	-17.7056	-21.2912	-24*		-30.3525	-33.2697	-35.1603	-38.7468	-42.14	-45.5609	-47.9286	-51.2952	-54.253436191409*	-56.8497768266505*
11.9904	-0.426146	-2.75586	-5.73167	-8.18109	-13.0113	-15.5435	-17.2468	-21.4035	-24*		-30.2019	-33.6119	-35.1971	-38.9491	-42.2189	-45.614	-48.1906	-51.077	-54.0792676942752*	-56.8977684938292*
12.1902	-0.0314235	-3.13436	-5.73178	-8.40338	-13.0204	-15.6796	-17.2607	-21.3474	-24*		-30.5709	-33.4955	-35.3935	-38.88	-42.2011	-45.7009	-48.4338	-51.0384	-54.1571402472259*	-57.4607857188272*
12.3901	-0.327669	-2.86593	-5.7734	-8.37075	-13.0058	-15.8723	-17.4467	-21.5528	-24*		-30.3191	-33.3679	-35.4319	-38.966	-42.1738	-45.7467	-48.2965	-51.2266	-54.3977578735058*	-57.1431448770756*
12.5899	0.110629	-2.55339	-5.95148	-8.39053	-12.8595	-15.9219	-17.2609	-21.5262	-24*		-30.6943	-33.4309	-35.5126	-39.0503	-42.1372	-45.7167	-48.262	-51.3127	-54.1683333911105*	-57.4344409410659*
12.7898	-0.0598132	-2.34178	-5.88468	-8.4285	-12.7729	-15.7445	-17.4465	-21.3907	-24*		-30.378	-33.3597	-35.6647	-39.0654	-42.1281	-45.5933	-48.3279	-51.3807	-54.3090747101926*	-57.4997952226613*
12.9896	-0.777621	-0.916942	-3.09832	-7.97786	-12.8646	-15.666	-17.4741	-21.2957	-24*		-30.4665	-33.9714	-34.6043	-37.7925	-41.4793	-42.8167	-47.0512	-50.0489	-53.1261840383878*	-55.4657999967051*
13.1894	-0.980022	-1.38369	-3.63877	-7.5097	-12.7187	-15.7724	-17.5851	-21.3582	-24*		-30.383	-33.7096	-34.3504	-37.7976	-41.6616	-42.879	-46.8121	-49.6993	-53.2202548771465*	-55.3049134095812*
13.3893	-0.430565	-2.19666	-3.97431	-7.99728	-12.606	-15.7271	-17.7325	-21.3916	-24*		-30.5475	-33.9483	-34.5595	-37.6365	-41.8008	-43.021	-47.0878	-50.0323	-53.2385511065413*	-55.8832185543928*
13.5891	-1.87477	-1.43452	-3.27942	-7.93595	-12.8711	-15.9009	-17.87	-21.4172	-24*		-30.7039	-33.671	-33.8891	-37.0071	-41.7144	-42.5227	-46.9074	-49.053	-52.990356775101*	-55.0744720290368*
13.789	-1.13116	-2.32391	-1.62323	-7.74863	-13.0812	-15.7949	-17.7831	-21.4363	-24*		-30.4678	-33.7113	-33.7603	-36.9048	-41.5743	-41.7363	-46.0975	-49.0332	-52.391544335926*	-54.8141184526744*
13.9888	-1.00319	-2.18863	-2.37723	-8.15921	-12.7693	-15.8865	-17.8173	-21.6996	-24*		-30.6876	-33.5947	-33.9298	-36.9812	-41.694	-42.5916	-46.2018	-48.991	-52.6864803921774*	-55.0851395996456*
14.1886	-1.12015	-1.97927	-2.96084	-8.33932	-13.017	-15.731	-17.7282	-21.3465	-24*		-30.1343	-33.6324	-34.2319	-37.4395	-41.9231	-43.6163	-46.4275	-49.4657	-52.77999306514*	-55.3402692615733*
14.3885	-0.544388	-2.65924	-3.52413	-8.43426	-12.8291	-15.8582	-17.7668	-21.4584	-24*		-30.4245	-33.6113	-34.5019	-37.7442	-42.0173	-44.0236	-46.8779	-49.575	-53.1555358604283*	-55.9040929506333*
14.5883	-0.305544	-1.83421	-3.82406	-8.74601	-13.0878	-15.8449	-17.7704	-21.2955	-24*		-30.1455	-33.3948	-34.8489	-37.6008	-41.942	-44.6522	-47.1415	-49.5941	-53.1203143793706*	-56.65082954489*
14.7882	-0.837845	-1.89025	-4.09679	-8.85601	-12.7197	-15.9289	-17.7607	-21.2938	-24*		-30.558	-33.7051	-34.9095	-38.0477	-42.06	-44.7038	-47.1176	-50.3221	-53.3306820193671*	-57.1417658491859*
14.988	-0.542888	-1.84708	-4.37829	-9.13276	-13.0803	-15.6235	-17.9745	-21.3712	-24*		-30.6653	-33.8784	-35.2002	-38.4128	-42.1976	-44.8968	-47.4276	-50.1208	-53.5360382596145*	-57.2055408409604*
15.1878	-0.281009	-2.59946	-4.70307	-9.08678	-13.3908	-15.9667	-18.0964	-21.4065	-24*		-30.4467	-33.1764	-35.3951	-38.0146	-42.2254	-45.8419	-47.5357	-50.3982	-53.5149537204923*	-57.5512263113028*
15.3877	-0.419871	-2.51776	-4.7755	-9.00353	-13.4221	-15.7135	-18.1525	-21.3694	-24*		-30.2009	-33.5911	-35.3829	-38.2753	-42.1019	-45.5294	-47.6489	-50.4765	-53.6493867281452*	-57.7709324170267*
15.5875	-0.356652	-2.87073	-4.84801	-9.18652	-12.8606	-15.8584	-18.0593	-21.3368	-24*		-30.1673	-33.2625	-35.5486	-38.3176	-42.192	-45.3383	-47.6957	-50.6939	-53.6907573038135*	-57.4818759370897*
15.7874	-1.06577	-2.83715	-5.02117	-9.23069	-13.5427	-15.5243	-18.5729	-21.3624	-24*		-30.3815	-33.2666	-35.8056	-38.3294	-42.2853	-45.6915	-47.7329	-51.2898	-54.0503595933847*	-57.8643169549153*
15.9872	-0.584931	-2.59812	-5.19218	-9.19493	-13.548	-15.5524	-18.6644	-21.503	-24*		-30.4155	-33.6867	-35.714	-38.4768	-42.2234	-45.4366	-47.8754	-50.7542	-54.0263830923708*	-57.6398510055547*
16.187	-0.48732	-0.437501	-4.97343	-8.15891	-12.8961	-15.6341	-18.3197	-21.2962	-24*		-30.4693	-33.0636	-34.7895	-37.5738	-41.8419	-43.9442	-47.3056	-50.171	-53.4386621603188*	-55.6683448664691*
16.3869	-0.708378	-1.44465	-5.08433	-7.99491	-12.9744	-15.9968	-18.3525	-18.6037	-24*		-25.2347	-29.5995	-34.9862	-37.6046	-41.7691	-43.7061	-47.3682	-49.7135	-53.6306549702126*	-55.6291916396595*
16.5867	-0.435099	-0.91796	-5.18374	-8.0267	-12.9979	-16.0549	-18.3946	-19.0925	-24*		-27.4068	-31.3193	-35.0813	-37.7467	-41.9329	-44.1431	-47.4203	-49.815	-53.7627392274814*	-56.1247770852671*
16.7866	-0.479861	-2.59299	-5.36168	-8.30585	-12.8329	-15.8949	-18.2664	-19.527	-24*		-28.9018	-32.3049	-35.3145	-38.0231	-41.9685	-44.3026	-47.5309	-49.8275	-53.8482043971973*	-56.5621132717834*
16.9864	-0.534357	-2.50687	-5.45016	-8.4315	-12.8863	-15.9875	-18.3611	-19.8756	-24*		-29.7885	-32.9058	-35.2993	-38.5311	-42.1384	-44.895	-47.6056	-49.9727	-53.9796345655752*	-56.562268160015*
17.1862	-0.842637	-2.40357	-5.4797	-8.48645	-13.0616	-13.4382	-17.9951	-20.2343	-24*		-30.1485	-33.3232	-35.3582	-38.6981	-42.0273	-45.2335	-47.5929	-50.1621	-53.9206803162372*	-56.7621217279769*
17.3861	-0.713076	-2.77777	-5.52508	-8.59185	-13.1306	-14.1677	-18.005	-20.2678	-24*		-30.1764	-33.5379	-35.5137	-38.7187	-42.1471	-44.794	-47.6889	-50.5165	-53.8292909507053*	-57.0602520451366*
17.5859	0.904222	-1.58793	-3.19939	-7.83975	-13.1134	-14.5772	-17.947	-20.3231	-24*		-29.952	-33.1638	-34.8644	-37.5643	-41.3741	-42.8515	-46.0239	-49.5966	-52.4028688840709*	-55.1655876443803*
17.7858	-0.435935	-1.24873	-3.82541	-7.62667	-13.2215	-14.4179	-18.0547	-20.5389	-24*		-29.763	-33.6915	-34.4144	-37.6647	-41.3271	-42.5587	-46.2739	-49.7673	-52.3180597279555*	-55.4549376280137*
17.9856	0.229731	-2.41127	-4.22854	-7.77294	-13.1178	-13.849	-17.8121	-20.4964	-24*		-30.1875	-33.3959	-34.715	-37.64	-41.4061	-43.5306	-46.5801	-49.7325	-52.3945886018048*	-55.6531636817513*
18.1854	-0.709669	-2.01737	-4.37729	-7.31557	-12.9642	-14.1102	-17.5938	-20.6352	-24*		-30.0618	-33.4487	-34.8073	-37.7862	-41.5444	-43.8669	-46.2744	-50.1367	-52.2108503777918*	-56.2208795315251*
18.3853	-0.185499	-2.68005	-4.76088	-7.83346	-13.031	-14.1308	-17.3615	-20.7855	-24*		-30.0759	-33.3818	-34.6792	-38.1513	-41.5814	-44.2277	-46.7281	-50.1394	-52.6765414334345*	-56.2041843856117*
18.5851	1.60784	-1.77753	-4.36768	-7.60487	-13.0468	-14.3348	-17.5433	-20.8872	-24*		-30.5918	-33.1197	-34.641	-37.9991	-41.2638	-43.5472	-46.4829	-49.8128	-52.6871434596876*	-56.222356671132*
18.785	2.48415	-1.33759	-3.44679	-7.11901	-13.1285	-14.4095	-17.6687	-20.9501	-24*		-30.5875	-33.4059	-34.2535	-37.2712	-40.7106	-42.5441	-45.6611	-48.9505	-51.6475684816887*	-55.0725430529017*
18.9848	1.91882	-1.7949	-3.844	-7.34345	-13.5863	-14.5283	-18.1046	-20.9802	-24*		-30.5688	-33.1966	-34.3822	-37.5201	-40.9153	-42.9854	-45.8768	-49.2863	-51.9379638355072*	-55.6203105100034*
19.1846	1.21226	-2.78994	-4.31112	-7.54769	-13.5812	-14.2921	-18.0262	-21.0005	-24*		-30.3213	-33.253	-34.4581	-38.0106	-41.1009	-42.675	-46.1788	-49.7642	-52.1823868445206*	-55.7642615418728*
19.3845	1.81451	-2.70728	-4.51106	-7.97453	-13.8174	-14.3849	-18.2468	-20.8984	-24*		-30.1525	-33.18	-34.5648	-37.8977	-41.1933	-44.5177	-46.3508	-49.9051	-52.3609656374513*	-55.9460074402638*
19.5843	0.783925	-2.52469	-3.74318	-7.75034	-13.7223	-14.7872	-18.3052	-20.7336	-24*		-29.4399	-32.2886	-34.1204	-37.9543	-41.1466	-43.2666	-46.4887	-49.7355	-52.2718636734433*	-55.4037223613942*
19.7842	0.707756	-2.20575	-2.72645	-7.44682	-13.6004	-14.5325	-18.4331	-20.7999	-24*		-29.7599	-33.0803	-33.4482	-37.057	-40.7888	-42.0476	-46.6973	-48.7712	-51.8724027835132*	-54.8884066019435*
19.984	0.318404	-3.43758	-3.23444	-7.82636	-13.3595	-14.683	-18.3831	-20.944	-24*		-30.3813	-33.6101	-33.7218	-37.4386	-40.8654	-42.7729	-46.7111	-49.1766	-52.146215403369*	-55.0333922016785*
20.1838	0.646074	-3.22871	-3.8083	-7.78229	-13.2378	-14.5487	-18.4251	-20.9205	-24*		-30.1514	-33.5254	-34.0477	-37.6909	-40.7438	-43.195	-46.7395	-49.284	-52.4369080290956*	-55.4797933882363*
20.3837	0.0897042	-3.20957	-4.06027	-8.18095	-13.142	-14.7778	-18.4215	-21.1126	-24*		-30.3912	-33.4976	-34.31	-37.5543	-40.8654	-44.1784	-47.0701	-50.0131	-52.6677462157615*	-56.2015079312243*
20.5835	-0.176884	-3.17432	-4.27553	-8.38731	-13.3956	-14.7713	-18.5052	-21.1747	-24*		-30.2442	-33.1959	-34.5395	-37.8806	-41.1157	-44.3231	-47.1704	-50.1681	-52.8919245039855*	-56.2438793648937*
20.7834	-0.409938	-3.14542	-4.55512	-7.81857	-13.579	-14.6267	-18.5845	-20.9004	-24*		-30.4829	-32.6293	-34.3226	-38.3885	-41.1097	-43.7492	-47.1319	-50.5776	-52.8241011623861*	-56.0054500751695*
20.9832	-0.398226	-2.67934	-4.70791	-7.97254	-13.0808	-15.0856	-18.5479	-20.3644	-24*		-28.9186	-30.6886	-34.3856	-38.3058	-40.9143	-43.256	-47.3443	-50.3385	-52.9403334707353*	-56.3828363203102*
21.183	0.525333	-3.06782	-4.92196	-8.24644	-13.1036	-14.5544	-18.4612	-20.6896	-24*		-29.385	-31.9516	-34.5731	-38.397	-41.1436	-44.9195	-47.2663	-50.5559	-53.0768274292572*	-56.6921104656348*
21.3829	0.694479	-2.59537	-5.0487	-8.45484	-12.9499	-14.745	-18.4554	-20.8584	-24*		-30.3839	-32.6001	-34.868	-38.5805	-41.3856	-45.1076	-47.5969	-50.7647	-53.0499792413033*	-56.9142342056107*
21.5827	0.242968	-2.67644	-5.23355	-8.48917	-13.3425	-14.4363	-18.4476	-21.0583	-24*		-30.5428	-33.1359	-34.8903	-38.6214	-41.3594	-44.9878	-47.4344	-51.024	-53.1139830923498*	-56.9469002167863*
21.7826	0.0849207	-3.25238	-5.2558	-8.74793	-13.4116	-14.6863	-18.6026	-21.0346	-24*		-30.3737	-33.1267	-35.0699	-38.6828	-41.3622	-45.1953	-47.7802	-51.0075	-53.1834757920607*	-57.4494845793327*
21.9824	-0.501867	-3.06367	-5.33611	-8.64753	-13.3715	-14.554	-18.4553	-21.3565	-24*		-30.2387	-33.5323	-35.1373	-38.5908	-41.4683	-45.1763	-47.7905	-51.2516	-53.5766960880945*	-57.7299250450528*
22.1822	-0.418227	-2.88214	-5.33288	-8.95889	-13.144	-14.9417	-18.6632	-21.3174	-24*		-30.0177	-33.6504	-35.4485	-38.5488	-41.4285	-45.1582	-48.0122	-51.1573	-53.6505431662526*	-57.9051905813764*
22.3821	-0.154638	-3.30623	-5.39581	-8.85391	-13.3715	-14.6254	-18.608	-21.2435	-24*		-30.2503	-33.3018	-35.0592	-39.1358	-41.4292	-45.098	-47.9009	-51.4375	-53.6055421448108*	-57.6371526957727*
22.5819	-0.0182122	-2.90805	-5.58693	-8.99502	-12.8282	-14.8384	-18.599	-19.9128	-24*		-27.1812	-30.3322	-35.3722	-38.9757	-41.5172	-44.6236	-47.951	-51.7262	-53.6855314652102*	-57.8873916192546*
22.7818	-0.180222	-2.9116	-5.69254	-9.211	-13.2827	-15.0595	-18.7006	-18.3892	-24*		-25.4016	-30.3036	-35.4663	-38.8524	-41.5172	-45.6554	-48.1807	-51.6289	-53.8722650815848*	-57.8513095505082*
22.9816	0.166275	-2.54286	-5.61965	-8.96245	-13.3114	-15.1413	-18.7631	-18.8734	-24*		-28.293	-31.6767	-35.3754	-39.1162	-41.658	-45.2957	-48.1017	-51.6937	-54.0982703828017*	-57.6726447876433*
23.1814	0.268466	-3.03723	-5.62188	-9.28587	-12.911	-15.3361	-18.5536	-19.4273	-24*		-29.1763	-32.7916	-35.4695	-38.8931	-41.7678	-45.3384	-48.031	-51.7508	-53.8419476800788*	-57.7775834649751*
23.3813	-0.461368	-2.83036	-5.60784	-9.15793	-13.0946	-15.1557	-18.6108	-19.5974	-24*		-29.8184	-33.2176	-35.5012	-38.9857	-41.7443	-45.5136	-48.1586	-51.9341	-53.8701595903146*	-57.5175786246923*
23.5811	0.196294	-2.912	-5.68766	-9.28234	-12.9765	-15.5442	-18.7683	-19.9282	-24*		-30.2079	-33.2189	-35.733	-39.0196	-41.7127	-45.5103	-48.2758	-51.783	-53.7497044085488*	-57.2923609210239*
23.781	-0.402779	-3.44425	-5.74156	-9.15963	-13.2723	-15.0203	-18.7269	-20.1821	-24*		-30.0031	-33.3267	-35.6978	-38.9862	-41.778	-45.6829	-48.3728	-51.9522	-53.9714714185179*	-57.2408184173815*
23.9808	-0.0495992	-2.97641	-5.86426	-9.2265	-13.4052	-15.2542	-18.8165	-20.4061	-24*		-30.0146	-33.4726	-35.7352	-39.1186	-41.8954	-45.4681	-48.4149	-51.8783	-53.954863048632*	-57.5933542473689*
24.1806	-0.586617	-3.66651	-5.92801	-9.19039	-13.1471	-15.5864	-18.9917	-20.4433	-24*		-30.1292	-33.3169	-35.7593	-39.1413	-41.8774	-45.5539	-48.2432	-51.8265	-54.0110294719392*	-57.3934785864538*
24.3805	-0.479008	-2.80497	-5.67029	-9.14153	-13.1223	-15.5117	-18.9648	-20.4101	-24*		-30.2262	-33.5574	-35.3262	-38.7083	-41.8517	-45.5171	-48.4223	-51.6629	-54.0540295108213*	-56.6782309834701*
24.5803	0.0579855	-2.40202	-5.80126	-8.74205	-13.2467	-15.5295	-19.0203	-20.444	-24*		-30.2037	-33.4934	-35.442	-38.7359	-41.9556	-45.7425	-48.3918	-52.1407	-54.0017421755422*	-57.0610884772207*
24.7802	-0.0291903	-2.75555	-5.82621	-8.84041	-13.1304	-15.5472	-18.7185	-20.4699	-24*		-30.0642	-33.5828	-35.6171	-38.76	-41.8545	-45.6618	-48.3617	-51.5853	-54.1035069534248*	-57.4750388807284*
24.98	-0.492894	-2.53189	-5.88968	-8.7623	-13.2048	-15.3301	-18.744	-20.44	-24*		-29.6545	-32.2011	-35.5709	-38.7599	-42.0152	-45.871	-48.5887	-51.5624	-54.11391378792*	-57.6679157078502*
25.1798	0.287405	-2.14947	-5.92308	-8.84197	-13.4699	-15.3724	-19.1183	-20.4625	-24*		-30.0344	-32.758	-35.6511	-38.9772	-41.9388	-45.5144	-48.6401	-51.4424	-54.140289263155*	-57.3774856638722*
25.3797	-0.324296	-2.00323	-6.01735	-8.9215	-13.4827	-15.3164	-18.943	-20.8242	-24*		-30.4331	-33.1486	-35.8382	-38.8249	-42.0478	-45.1289	-48.5015	-51.7289	-54.2434585369329*	-57.7809450384724*
25.5795	-0.399043	-2.00035	-6.03865	-8.9453	-13.3455	-15.288	-18.8861	-20.8742	-24*		-30.2311	-33.1226	-35.5903	-39.1513	-41.9467	-45.4171	-48.5755	-51.9371	-54.1001707766093*	-57.6909774252438*
25.7794	0.339704	-1.2465	-4.87412	-8.55222	-13.5649	-15.3127	-19.0923	-20.8059	-24*		-30.1789	-33.0149	-35.2974	-38.6881	-41.8942	-44.5488	-47.8068	-51.4068	-53.9016019392598*	-56.2200613795782*
25.9792	3.83261	1.05096	-3.31843	-7.73593	-13.5588	-15.307	-19.1982	-20.9093	-24*		-30.2378	-32.698	-33.9215	-37.4483	-40.7751	-42.2899	-46.0306	-48.771	-52.1906560420716*	-54.8874373627032*
26.179	3.15924	-0.795828	-3.66792	-7.68857	-13.1853	-15.6146	-19.288	-20.9273	-24*		-30.1791	-33.1362	-34.002	-37.1889	-40.4822	-42.1621	-45.9183	-48.8483	-51.8205525165396*	-54.8120944530845*
26.3789	1.55552	-2.11374	-4.07813	-8.10381	-12.9322	-15.5096	-19.203	-21.0894	-24*		-30.3281	-32.9039	-34.0956	-37.3791	-40.484	-42.3452	-46.2793	-48.9178	-52.0215899501987*	-55.5126928839185*
26.5787	2.04203	-2.19077	-4.44146	-8.16955	-13.1095	-15.3577	-19.2342	-18.7096	-24*		-25.6961	-29.5068	-34.2896	-37.4816	-40.7316	-43.4172	-46.7173	-49.3747	-52.3759279875898*	-55.7851120634703*
26.7786	1.24486	-2.53012	-4.64676	-7.90611	-13.2366	-15.3754	-19.199	-19.0356	-24*		-27.31	-31.0314	-34.4509	-37.7437	-40.7034	-44.1617	-46.6737	-49.93	-52.4920333255647*	-56.2230531930566*
26.9784	0.911701	-2.57308	-4.95637	-8.07302	-13.266	-15.2675	-19.1871	-19.3498	-24*		-29.1282	-32.0403	-34.6988	-38.0252	-40.7831	-43.9875	-46.9513	-50.1802	-52.6995714408472*	-56.5953860908642*
27.1782	1.63112	-3.10458	-5.15482	-8.35847	-13.2057	-15.5283	-19.1796	-19.6774	-24*		-29.3502	-32.8067	-34.7381	-38.244	-41.0382	-45.0413	-47.1939	-50.5924	-52.9050709762313*	-56.6148644737725*
27.3781	0.444444	-3.28763	-5.36684	-8.69434	-13.0467	-15.686	-19.2402	-19.8632	-24*		-29.9357	-33.0527	-34.8868	-38.3633	-41.2067	-45.4464	-47.427	-50.3739	-52.885105388725*	-57.043709993887*
27.5779	1.18501	-3.28322	-5.27498	-8.46339	-12.8735	-15.8179	-19.1961	-20.2075	-24*		-29.7305	-33.0456	-34.8393	-38.7634	-41.2516	-44.7712	-47.2651	-50.613	-52.9611525813132*	-56.6220775854567*
27.7778	0.0794698	-3.42309	-5.65089	-8.58078	-12.9466	-15.6122	-19.1901	-20.3995	-24*		-29.9343	-33.4346	-35.0367	-38.8608	-41.4303	-44.4733	-47.4795	-50.957	-53.5894062256414*	-57.0652721580163*
27.9776	0.488558	-2.79829	-5.33025	-8.03935	-13.302	-15.5	-19.4	-21.0571	-24*		-30.4234	-34.161	-34.5301	-38.7838	-41.6699	-43.7806	-47.7664	-50.4796	-53.5280268320774*	-57.3033263901639*
28.1774	0.935918	-3.17005	-4.88225	-7.64144	-12.8931	-15.7626	-19.3733	-21.4124	-24*		-30.6843	-34.1416	-34.456	-38.5245	-41.8068	-44.8554	-48.0118	-50.9167	-53.490895353818*	-57.2307841780998*
28.3773	1.93867	-2.51994	-4.396	-7.82997	-12.8357	-15.2557	-18.9757	-18.9064	-24*		-29.1635	-33.1144	-34.7891	-37.9816	-41.3436	-46.0893	-48.7509	-50.472	-53.5700871793426*	-57.6089833488974*
28.5771	2.18601	-1.10871	-4.21821	-8.20022	-12.7607	-14.6299	-18.9497	-20.0091	-24*		-30.3381	-34.8434	-35.0196	-38.5023	-41.6095	-44.5858	-48.0765	-50.9079	-53.7061355323129*	-57.5072624033081*
28.777	0.110371	-2.63203	-3.85537	-8.73709	-12.4463	-14.0151	-18.823	-18.4859	-24*		-29.9841	-33.5828	-35.3974	-37.9057	-41.7962	-45.5202	-47.85	-50.5793	-53.6625957786469*	-57.8568981174511*
28.9768	-0.309104	-3.01279	-3.50219	-8.43537	-12.5661	-14.2537	-18.6144	-19.1426	-24*		-30.7911	-34.2695	-35.1202	-38.1415	-42.2117	-45.6504	-48.1027	-50.2869	-53.8140450333976*	-58.3475513706307*
29.1766	-0.67662	-3.50762	-3.67947	-8.27214	-12.3295	-12.8503	-17.7944	-17.738	-24*		-30.4672	-33.4281	-35.1347	-38.07	-42.2176	-45.7505	-48.2136	-50.6834	-53.7651390683256*	-58.095427181803*
29.3765	-0.38844	-3.52566	-2.83254	-7.40164	-11.5381	-13.0931	-17.4668	-18.5984	-24*		-30.3906	-33.8381	-34.6623	-38.2822	-42.4201	-45.0482	-48.2155	-50.7728	-53.7886996305166*	-58.585051806083*
29.5763	-0.48973	-3.45022	-4.01317	-7.96377	-11.5965	-13.168	-17.1878	-18.9942	-24*		-30.7072	-33.3042	-35.1482	-38.1893	-42.1371	-45.674	-48.2072	-51.4463	-54.5627149622183*	-58.3888556909012*
29.7762	-0.0502799	-3.21123	-4.61794	-8.17402	-11.8882	-12.6782	-16.8129	-19.273	-24*		-30.2177	-33.2698	-35.6385	-38.6426	-42.2244	-45.6006	-48.2119	-51.4859	-54.6564639411552*	-58.6620386214719*
29.976	-0.193473	-3.84562	-3.33756	-6.73417	-10.9622	-12.5839	-16.4871	-19.4442	-24*		-30.2927	-33.5379	-34.7371	-38.4344	-42.4848	-45.0097	-48.1391	-51.3998	-54.1150396926755*	-58.3715305394816*
30.1758	-0.080317	-3.36867	-3.87551	-7.02114	-11.0875	-12.2581	-16.0828	-19.8174	-24*		-30.5005	-33.4272	-34.723	-38.3785	-42.5807	-46.0938	-48.1156	-51.5899	-54.09008079366*	-58.0966236458799*
30.3757	0.440405	-3.66584	-4.31044	-7.95287	-11.0126	-12.6978	-15.9287	-19.9467	-24*		-30.3765	-33.3753	-35.1599	-38.6713	-42.4015	-46.3522	-48.1979	-51.3295	-54.007218030905*	-58.1364217256105*
30.5755	-0.390216	-3.85225	-4.31597	-7.6739	-11.1016	-12.7341	-15.674	-20.2067	-24*		-30.1686	-33.2994	-35.0253	-38.4833	-42.418	-45.5751	-48.4039	-51.244	-54.1852341556297*	-58.3054916138934*
30.7754	0.166351	-3.74871	-4.4535	-8.07954	-11.168	-13.1666	-15.5245	-20.3556	-24*		-30.2255	-33.4416	-35.0656	-38.4453	-42.4553	-45.9506	-48.3957	-51.3756	-53.9236151759768*	-58.1719368606689*
30.9752	-0.12338	-3.61472	-4.83115	-8.13641	-11.2892	-13.2953	-15.4513	-20.8547	-24*		-30.3818	-33.9949	-35.2069	-38.6061	-42.4134	-46.3311	-48.5722	-51.3352	-54.0781978177166*	-58.3715222249293*
31.175	-0.197722	-3.43189	-4.93354	-8.37274	-11.4857	-13.3636	-15.1925	-21.1075	-24*		-30.4828	-33.7055	-35.2935	-38.7389	-42.3534	-46.3179	-48.465	-51.5953	-54.1235047873753*	-58.0637999314029*
31.3749	0.398032	-3.17065	-5.08324	-8.27968	-11.4913	-13.5347	-15.0524	-21.5332	-24*		-30.3637	-34.0079	-35.4053	-39.0037	-42.2868	-46.1131	-48.4681	-51.6275	-54.1895262581314*	-57.7536210440081*
31.5747	-0.0178428	-3.32513	-5.31921	-8.44666	-11.8705	-13.6275	-15.3049	-21.7511	-24*		-30.4299	-34.4588	-35.5977	-38.8537	-42.2633	-45.8805	-48.4353	-51.8471	-54.2960982371701*	-58.0029647277652*
31.7746	0.0876008	-3.3964	-5.42355	-8.54839	-11.8371	-13.655	-15.1712	-21.3777	-24*		-30.392	-33.9011	-35.7115	-39.0916	-42.1119	-45.0951	-48.3927	-52.2434	-54.1763682980898*	-57.7874129287114*
31.9744	0.209885	-3.49596	-5.64845	-8.82061	-12.0072	-13.8216	-15.2681	-21.5813	-24*		-30.7047	-33.5387	-35.8925	-39.471	-42.0568	-45.3706	-48.1288	-52.027	-54.041563116085*	-57.9468114485311*
32.1742	-0.0854466	-3.34271	-5.85013	-8.82961	-11.8538	-14.1713	-15.5276	-21.8275	-24*		-30.5918	-34.2933	-35.8464	-39.5568	-42.1548	-45.3876	-48.2205	-51.7401	-54.1890762186936*	-57.7292487156124*
32.3741	-0.11059	-3.57151	-5.8327	-8.95042	-11.6613	-14.1974	-15.7213	-21.5969	-24*		-30.2894	-34.0041	-36.032	-39.4575	-42.0683	-45.6203	-48.4498	-51.6677	-54.237512594921*	-57.6166500787996*
32.5739	-0.390208	-3.26923	-5.8341	-8.95627	-11.9393	-14.3614	-15.7184	-21.8513	-24*		-30.4182	-34.4469	-35.9233	-39.5509	-42.0135	-45.6282	-48.3946	-51.6425	-54.3381111217002*	-57.5445386793243*
32.7738	0.1365	-3.38169	-5.85549	-9.20108	-11.887	-14.2143	-15.828	-21.8098	-24*		-30.659	-34.2514	-35.8438	-39.6439	-42.1386	-45.3955	-48.3445	-51.8994	-54.4127498500649*	-57.6523837678044*
32.9736	-0.0461177	-3.53045	-6.03671	-9.26289	-12.2888	-14.4919	-16.0296	-22.0285	-24*		-31.0643	-34.0662	-36.2044	-39.7595	-42.1726	-45.5518	-48.4215	-51.6677	-54.4571983488383*	-57.6766518079583*
33.1734	0.515388	-2.89434	-6.11389	-9.27843	-12.6275	-14.636	-16.4538	-22.0027	-24*		-30.4396	-34.4485	-36.0272	-39.6718	-42.2035	-45.5942	-48.1967	-51.6853	-54.26540627306*	-57.9010094305802*
33.3733	0.243848	-2.98252	-6.13444	-9.08957	-12.0462	-14.4945	-16.2215	-22.0411	-24*		-30.8604	-34.3943	-36.091	-40.0495	-42.2184	-45.515	-48.3584	-51.8013	-54.4515643911747*	-57.5617318669209*
33.5731	-0.172109	-3.422	-6.19023	-9.09186	-12.1135	-14.7696	-16.4607	-21.9146	-24*		-30.6653	-34.2147	-36.1413	-39.8754	-42.2172	-45.3182	-48.5731	-51.8318	-54.5201909715467*	-57.924717545026*
33.773	0.145623	-3.33994	-6.24825	-9.29899	-12.3672	-14.5569	-16.5666	-21.9863	-24*		-30.6832	-33.8356	-36.3084	-39.958	-42.2548	-45.579	-48.5109	-51.8735	-54.3881714087067*	-57.6380029181357*
33.9728	0.345995	-2.84707	-6.31763	-9.1704	-11.997	-15.0226	-16.8215	-21.8331	-24*		-30.316	-33.8861	-36.2308	-39.8503	-42.4282	-45.9975	-48.626	-51.766	-54.7108867689901*	-57.8437462773926*
34.1726	0.150516	-3.13824	-6.32244	-9.28406	-12.2268	-15.0094	-16.7906	-22.1009	-24*		-30.5344	-34.45	-36.1942	-39.8503	-42.412	-45.8986	-48.3612	-51.7974	-54.5634843422244*	-57.8519816038932*
34.3725	0.160026	-3.61585	-6.30368	-9.39279	-12.4751	-15.0754	-16.848	-21.994	-24*		-30.5732	-34.001	-36.4159	-39.7615	-42.47	-45.9318	-48.5154	-51.8621	-54.4241467511691*	-58.2900740583315*
34.5723	-0.132352	-3.07596	-6.22356	-9.25757	-12.4158	-14.9791	-17.0245	-22.2254	-24*		-30.732	-34.2158	-36.3066	-39.9664	-42.3368	-45.99	-48.7045	-51.9309	-54.6024997182199*	-58.1332526933887*
34.7722	-0.0814353	-3.0183	-6.48671	-9.45511	-12.0205	-14.8647	-17.2706	-22.1318	-24*		-30.6072	-34.0166	-36.3514	-39.7991	-42.3915	-46.0812	-48.4163	-51.8855	-54.5222505116337*	-58.1782093589287*
34.972	-0.30261	-3.18765	-6.44816	-9.33705	-11.9849	-15.0178	-17.2908	-22.0383	-24*		-30.5073	-33.7884	-36.4418	-39.91	-42.4183	-46.106	-48.6323	-52.0744	-54.4598788345177*	-58.1253361705793*
35.1718	0.220965	-3.46678	-6.43073	-9.50468	-12.1314	-14.81	-17.2584	-22.0782	-24*		-30.1691	-34.0495	-36.4613	-39.6835	-42.4601	-46.4759	-48.6703	-52.0685	-54.7685482483006*	-58.0509548983245*
35.3717	-0.368895	-3.74685	-6.45989	-9.40388	-12.1742	-15.1655	-17.5106	-21.8958	-24*		-30.3896	-33.7881	-36.4732	-39.8035	-42.5117	-46.0659	-48.6884	-51.9847	-54.6391174703141*	-58.2843453317925*
35.5715	-0.494493	-3.58574	-6.46937	-9.34547	-12.2616	-15.0931	-17.5178	-21.8556	-24*		-30.4721	-33.6929	-36.5496	-39.9407	-42.4156	-45.9806	-48.8505	-51.9548	-54.6774262460997*	-58.2267528035542*
35.7714	0.02882	-3.9775	-6.45627	-9.34011	-12.4868	-15.0961	-17.635	-21.8438	-24*		-30.1732	-33.5539	-36.4582	-39.9263	-42.5515	-46	-48.6836	-51.8944	-54.6330144276566*	-58.0551765528683*
35.9712	0.17515	-3.48057	-6.42813	-9.3579	-12.6717	-14.9251	-17.7797	-22.0254	-24*		-30.4828	-33.6705	-36.4338	-39.8892	-42.5056	-45.8657	-48.7681	-51.8628	-54.7197345886753*	-57.8944996112418*
36.171	-0.365671	-3.13242	-6.40592	-9.47405	-11.9982	-15.1349	-17.703	-22.2456	-24*		-30.3983	-34.467	-36.5486	-39.7373	-42.6822	-45.9196	-48.8123	-51.9676	-54.7430811150925*	-58.4787229356056*
36.3709	-0.75941	-3.39296	-6.37835	-9.31367	-11.9919	-15.2423	-17.6199	-21.9797	-24*		-30.5715	-33.5754	-36.4542	-39.7972	-42.5983	-46.1789	-48.6191	-52.0254	-54.8707553687978*	-58.3319853409204*
36.5707	-0.187628	-3.21754	-6.49883	-9.20773	-12.1521	-15.0828	-17.6857	-22.1709	-24*		-30.5803	-33.7678	-36.4367	-39.7682	-42.5166	-45.9201	-48.9481	-52.0352	-54.8813332102177*	-58.0651959447351*
36.7706	-0.182669	-3.5175	-6.45828	-9.41669	-12.2205	-15.2378	-17.7989	-22.0827	-24*		-30.7414	-33.8557	-36.5211	-39.827	-42.5924	-46.061	-48.8392	-52.1283	-54.7706754051505*	-57.7788152065096*
36.9704	0.348939	-3.10726	-6.57596	-9.51591	-12.0368	-15.1751	-17.8654	-22.233	-24*		-30.7362	-34.2495	-36.5904	-39.9334	-42.6253	-46.1856	-48.7718	-51.9751	-54.8392041377182*	-57.8366148858796*
37.1702	-0.101904	-4.01499	-6.5471	-9.33754	-12.2322	-15.0975	-17.8992	-22.1622	-24*		-30.5867	-33.8453	-36.604	-40.0423	-42.5987	-45.9307	-48.9037	-51.7066	-54.7291833006953*	-57.4674216818021*
37.3701	0.0397472	-4.1247	-6.47464	-9.35985	-12.1527	-15.0862	-17.8605	-21.9135	-24*		-30.3592	-33.6238	-36.5105	-40.0504	-42.627	-45.1291	-48.6579	-52.1594	-54.786474852828*	-57.4656307272353*
37.5699	-0.251586	-3.45552	-6.55578	-9.12851	-12.3389	-15.2695	-17.9823	-21.9934	-24*		-30.499	-33.5242	-36.4008	-40.0409	-42.6443	-45.4506	-48.9032	-52.1441	-54.7679554175768*	-57.7311866001963*
37.7698	-0.232138	-3.24014	-6.61009	-9.21742	-12.6771	-15.1133	-17.9519	-21.9217	-24*		-30.263	-33.5402	-36.5877	-39.9858	-42.7402	-46.0865	-49.0613	-51.8859	-54.6288559463584*	-57.6688040583744*
37.9696	-0.442481	-3.11786	-6.60678	-9.16616	-12.7077	-15.8179	-18.4969	-21.9215	-24*		-30.4444	-33.4482	-36.7375	-39.7495	-42.6881	-46.3336	-49.0005	-51.9418	-54.7712828475443*	-57.962038125728*
38.1694	0.0556695	-2.97723	-6.56504	-9.23744	-12.2942	-15.346	-17.913	-21.9004	-24*		-30.4343	-33.5203	-36.6919	-39.862	-42.6605	-46.3088	-48.9809	-51.8494	-54.7850210420424*	-57.9089465022117*
38.3693	-0.0708488	-3.1174	-6.4454	-9.17795	-12.1974	-15.2927	-18.0127	-22.1465	-24*		-30.4841	-33.868	-36.6292	-39.8993	-42.7743	-46.1928	-49.0236	-51.8187	-54.7406787549948*	-58.0076281225951*
38.5691	-0.0579149	-3.37887	-6.61647	-9.29744	-12.2986	-15.4264	-18.1263	-22.0385	-24*		-30.3799	-33.9831	-36.5679	-39.8063	-42.6276	-45.9888	-48.9653	-51.9484	-54.7161866736451*	-57.8287595344194*
38.769	-0.764396	-3.58921	-6.56746	-9.26637	-12.4529	-15.2949	-18.1808	-22.1131	-24*		-30.2471	-33.3742	-36.6643	-39.8218	-42.613	-46.2454	-48.7418	-51.7523	-54.7518153668318*	-57.8117084068879*
38.9688	-0.0408146	-3.29193	-6.69482	-9.2555	-12.5082	-15.6055	-18.3168	-22.0079	-24*		-30.2209	-33.8127	-36.5928	-40.1067	-42.8232	-45.448	-48.9904	-51.9384	-54.6170914357895*	-57.8159649825514*
39.1686	-0.475917	-3.28627	-6.57075	-9.08815	-12.8774	-15.2157	-18.3256	-22.1832	-24*		-30.4133	-34.2222	-36.54	-39.8631	-42.8064	-46.2457	-48.8254	-51.8702	-54.9103520877212*	-57.9283530236322*
39.3685	-0.301289	-3.05511	-6.62978	-9.08466	-12.7835	-15.5657	-18.281	-22.3821	-24*		-30.5599	-35.0139	-36.5953	-40.1112	-42.7097	-45.561	-48.8811	-52.0119	-54.7341812980159*	-57.759422819828*
39.5683	-0.392616	-3.32065	-6.60149	-9.18682	-13.0328	-15.257	-18.3184	-21.6703	-24*		-29.5663	-32.5296	-36.5826	-39.7482	-42.7325	-45.7272	-48.7914	-51.9514	-54.7529519532219*	-57.7920203784822*
39.7682	-0.433763	-3.16969	-6.51461	-9.33203	-12.9547	-15.4373	-18.4083	-19.8967	-24*		-26.6687	-30.0345	-36.5974	-39.9968	-42.8337	-45.4417	-48.8472	-51.7749	-54.704961081776*	-57.9084437093558*
39.968	0.447808	-2.91251	-6.5412	-9.3726	-12.7434	-15.3043	-18.2085	-20.6046	-24*		-28.7537	-32.7325	-36.6976	-39.8467	-42.8665	-46.1138	-48.9761	-51.9531	-54.8163418118156*	-58.0041395740061*
40.1678	0.122393	-2.79988	-6.58323	-9.24364	-12.9643	-15.387	-18.1946	-20.6693	-24*		-29.5275	-33.5938	-36.5986	-40.0548	-42.7898	-45.4891	-49.0315	-52.0815	-54.9417874331417*	-58.0317226261645*
40.3677	-0.639733	-3.62549	-6.43558	-9.19135	-12.8879	-15.5915	-18.3592	-20.8464	-24*		-29.8759	-33.9429	-36.6228	-39.9425	-42.8531	-45.8693	-48.8876	-52.0238	-54.8760810706082*	-57.8915825099548*
40.5675	-0.274514	-3.16653	-6.43104	-9.21818	-12.8978	-15.547	-18.6053	-21.1221	-24*		-30.3128	-34.0688	-36.6605	-39.8468	-42.9238	-46.1085	-49.0052	-52.045	-54.6200779603791*	-58.0186842203552*
40.7674	0.00836052	-3.24915	-6.53765	-9.34054	-12.7268	-15.6435	-18.4715	-20.9329	-24*		-30.3522	-33.711	-36.7038	-39.7509	-42.9404	-45.9358	-48.9262	-51.9931	-54.6807953949044*	-58.1715630621531*
40.9672	0.430907	-3.2001	-6.67165	-9.42311	-12.4629	-15.4197	-18.5909	-20.6262	-24*		-29.8979	-33.5356	-36.6663	-39.8673	-42.8811	-45.7204	-48.9186	-52.1519	-54.8447908341869*	-57.7003981693446*
41.167	-0.117144	-3.54379	-6.57052	-9.11358	-12.4348	-15.8359	-18.7895	-20.8976	-24*		-30.4859	-33.387	-36.678	-39.8771	-42.9421	-46.0925	-48.9699	-51.8247	-54.7812778344842*	-57.9503414511024*
41.3669	-0.333466	-2.86611	-6.30881	-8.51689	-12.5536	-15.5785	-18.6153	-20.9237	-24*		-30.0919	-33.182	-36.2572	-39.2792	-42.8763	-44.8891	-48.6672	-51.3445	-54.6891358369431*	-56.5534049660359*
41.5667	-0.241746	-3.12487	-6.29008	-8.79224	-12.8816	-15.5429	-18.5527	-20.9801	-24*		-30.3819	-33.2432	-36.456	-39.0438	-42.9291	-45.4557	-48.7326	-51.2331	-54.7333380534984*	-56.2220434500687*
41.7666	-0.043649	-2.68146	-6.42031	-8.16537	-13.0326	-15.4858	-18.5772	-20.9676	-24*		-30.1448	-33.0004	-36.5388	-38.5202	-42.971	-45.5595	-48.7325	-51.2999	-54.8471689086812*	-55.4929434466051*
41.9664	0.0835109	-3.13552	-6.45395	-8.20569	-12.9355	-15.2278	-18.5965	-20.4082	-24*		-28.0964	-29.4932	-36.4674	-38.7566	-42.9487	-45.1158	-48.9037	-50.9939	-54.6456691416275*	-55.4731417463914*
42.1662	0.281218	-3.1081	-6.43254	-8.35793	-13.1129	-15.5538	-18.7255	-20.0164	-24*		-28.2968	-30.3992	-36.6286	-38.6691	-42.9931	-45.449	-48.8328	-51.1218	-54.6500134430608*	-55.5457004687807*
42.3661	-0.0728578	-2.83512	-6.45077	-8.21975	-12.1564	-15.5871	-18.5299	-20.3865	-24*		-29.1331	-31.8545	-36.6518	-38.7759	-42.8806	-45.5592	-48.8316	-51.3824	-54.6703284006366*	-55.8114881989717*
42.5659	0.382872	-3.1878	-6.32677	-8.33239	-12.2498	-15.737	-18.5183	-20.8534	-24*		-29.8255	-33.6766	-36.562	-38.8443	-42.9268	-45.6375	-49.0491	-50.9902	-54.5779278269206*	-56.1439734860728*
42.7658	-0.105213	-2.87766	-6.45826	-8.42407	-12.1088	-15.5425	-18.5479	-20.9476	-24*		-30.4819	-34.0315	-36.5336	-39.0215	-42.8774	-45.8112	-48.8514	-51.2522	-54.8522047955739*	-56.3329765632752*
42.9656	0.0419942	-2.81899	-6.5348	-8.4628	-12.2308	-15.545	-18.6973	-20.8822	-24*		-30.3307	-33.7278	-36.6044	-39.2903	-42.8518	-45.739	-48.563	-51.2737	-54.6677698468246*	-56.5854954557788*
43.1654	-0.0401112	-3.19731	-6.50318	-8.59055	-12.042	-15.8009	-18.7094	-20.9444	-24*		-30.3408	-33.1309	-36.5285	-39.5414	-42.8794	-45.3448	-48.7866	-50.9059	-54.8736544249072*	-56.5545419216742*
43.3653	0.00828845	-3.32987	-6.4475	-8.5391	-12.0996	-15.9573	-18.68	-21.1666	-24*		-30.4936	-33.935	-36.5663	-39.3854	-42.795	-45.3926	-48.7603	-51.4446	-55.0833706867296*	-56.7458786561502*
43.5651	0.00360438	-3.46577	-6.50201	-8.86621	-12.3051	-15.7264	-18.5635	-21.3654	-24*		-30.4345	-34.1539	-36.6142	-39.5169	-42.8404	-45.7836	-48.6815	-51.2513	-54.8688034512184*	-56.9243461384448*
43.765	0.214437	-3.61701	-6.64848	-8.86697	-12.3763	-15.7471	-18.7372	-21.1838	-24*		-30.3924	-33.8387	-36.6141	-39.8158	-42.9523	-45.3484	-48.7832	-51.3131	-54.8478016443798*	-57.029601315149*
43.9648	-0.347038	-3.39445	-6.54604	-9.00226	-12.3991	-15.4252	-18.6879	-21.0957	-24*		-30.1397	-33.7151	-36.7339	-39.4898	-42.9418	-46.1808	-48.7885	-51.5966	-54.8152994455048*	-57.6006539491764*
44.1646	-0.367657	-3.04548	-6.49894	-9.10911	-12.5394	-15.5881	-18.6435	-21.3121	-24*		-30.1886	-34.3279	-36.6936	-39.5542	-42.9586	-45.8651	-48.7996	-51.7957	-54.6953171779981*	-57.5888320811489*
44.3645	-0.248412	-3.25501	-6.5157	-9.03419	-12.3299	-15.7227	-18.8624	-21.348	-24*		-30.6301	-34.1763	-36.6966	-39.6632	-42.8811	-45.8467	-48.788	-51.642	-54.8254030626538*	-57.6348942258077*
44.5643	-0.380551	-3.36569	-6.5113	-9.27015	-12.358	-15.6194	-18.6419	-21.0782	-24*		-30.3255	-33.8824	-36.7069	-39.3656	-42.9119	-46.3041	-48.8066	-51.463	-54.8582444538143*	-57.7800241424149*
44.7642	-0.281985	-3.17134	-6.56338	-9.13485	-12.6326	-15.5893	-18.5624	-21.1346	-24*		-29.9465	-33.5605	-36.7343	-39.6458	-42.8318	-45.8865	-48.7862	-51.6782	-54.7977386365795*	-57.6925037394886*
44.964	-0.215491	-3.50096	-6.58915	-9.161	-12.9397	-15.6531	-18.7494	-21.0326	-24*		-29.7715	-31.7288	-36.7604	-39.7	-42.8122	-45.7702	-48.7467	-51.4757	-54.7052018216365*	-57.7062606413964*
45.1638	-0.900654	-2.53002	-6.28548	-8.56582	-12.5705	-15.7643	-18.8349	-21.0324	-24*		-30.2241	-32.2001	-36.3169	-39.0881	-42.8787	-45.2924	-48.5454	-50.9767	-54.6776145854882*	-56.1889743375194*
45.3637	-0.254345	-3.20836	-6.28842	-8.16103	-12.649	-15.4821	-18.6915	-21.2561	-24*		-30.0609	-32.8938	-36.3196	-38.8482	-42.8222	-44.9328	-48.8027	-50.7008	-54.6997206315026*	-55.6671737023872*
45.5635	0.0498874	-2.90378	-6.1124	-7.69979	-12.6558	-15.7946	-18.6813	-21.1437	-24*		-30.1464	-33.2909	-36.3952	-38.652	-42.942	-45.4765	-48.6866	-50.6749	-54.6670986169332*	-55.4738686758216*
45.7634	-0.0859153	-2.83858	-6.21147	-7.93755	-12.4296	-15.7175	-18.6828	-21.233	-24*		-29.9339	-33.5622	-36.3205	-38.646	-42.9159	-45.4426	-48.7926	-50.6734	-54.7381986003504*	-55.7554445530488*
45.9632	0.865599	-3.24563	-6.2984	-7.80412	-12.3578	-15.5729	-18.8376	-21.3227	-24*		-30.4728	-33.552	-36.2494	-38.6865	-42.8297	-45.9589	-48.6737	-50.6571	-54.6303825131839*	-55.8450692503844*
46.163	0.487396	-3.22761	-6.36056	-8.09434	-12.5253	-15.7268	-18.623	-21.7733	-24*		-30.6915	-34.233	-36.3762	-38.8559	-42.9372	-45.6854	-48.5395	-51.099	-54.6258887696354*	-56.1581204592631*
46.3629	-0.228565	-3.29076	-6.30593	-8.0662	-12.61	-15.6234	-18.7174	-21.5065	-24*		-30.4853	-33.9402	-36.3871	-39.0001	-43.1412	-45.4328	-48.777	-51.3853	-54.6257706670333*	-56.3169749698034*
46.5627	0.541766	-3.38007	-6.51509	-8.34475	-12.3891	-15.6427	-18.6408	-21.356	-24*		-29.8314	-31.6517	-36.4633	-39.2613	-42.9754	-45.5393	-48.6811	-51.3198	-54.7873896441437*	-56.5474437883704*
46.7626	0.20872	-3.40695	-6.24539	-8.13115	-13.2145	-15.7737	-18.8606	-21.2204	-24*		-30.1544	-32.0573	-36.4131	-39.2487	-42.9052	-45.7854	-48.7297	-51.6148	-54.9273956435265*	-57.0174447388795*
46.9624	-0.319724	-2.19841	-6.19994	-8.18082	-12.4472	-15.7258	-18.6718	-21.5744	-24*		-30.3696	-33.0732	-36.4738	-38.792	-42.9789	-45.8632	-48.6599	-51.5442	-54.6902218367238*	-56.5864807302271*
47.1622	0.308588	-2.22384	-6.18203	-8.07233	-12.7437	-15.553	-18.6313	-21.3695	-24*		-30.3677	-33.2746	-36.4517	-38.6642	-43.0857	-45.6176	-48.5589	-51.2702	-54.7648563327428*	-56.1272080228027*
47.3621	0.0224107	-2.67734	-6.23694	-8.08267	-12.8765	-15.7954	-18.7214	-21.5626	-24*		-30.2872	-33.6703	-36.4465	-38.6769	-42.9918	-45.272	-48.4111	-51.5454	-54.6671555520613*	-56.144566194873*
47.5619	-0.00759024	-2.95883	-6.22254	-8.05009	-12.391	-15.9525	-18.5715	-21.4351	-24*		-30.43	-33.5407	-36.5488	-38.9587	-42.9659	-45.515	-48.4988	-51.4699	-54.6626382283005*	-56.3584252698566*
47.7618	0.779617	-2.85941	-6.23472	-8.07912	-12.4776	-15.8751	-18.6477	-21.4625	-24*		-29.6968	-32.0603	-36.551	-39.162	-42.9265	-45.2529	-48.437	-51.7306	-54.6100059850535*	-56.5123718189499*
47.9616	-0.159656	-3.21619	-6.31259	-8.41099	-12.8156	-15.6087	-18.7751	-21.592	-24*		-29.9377	-32.6745	-36.6183	-39.2754	-42.8664	-45.6288	-48.5912	-51.3686	-54.9255707970915*	-56.7225350754334*
48.1614	2.27991	-0.0569519	-4.56854	-7.5348	-12.5633	-15.6198	-18.7365	-21.5931	-24*		-30.3194	-33.1984	-35.5212	-38.3587	-42.2495	-43.0565	-47.4574	-49.6015	-53.8298797506235*	-55.6503961236265*
48.3613	1.78984	-1.43545	-5.16332	-7.32062	-12.7514	-15.4805	-18.7792	-21.6074	-24*		-30.2504	-33.8232	-35.3958	-37.4012	-42.3843	-44.0089	-47.2956	-49.2475	-53.7417938519202*	-55.5283575004633*
48.5611	1.23318	-2.44747	-5.48612	-7.50196	-13.048	-15.6726	-18.9236	-21.7497	-24*		-30.3953	-34.0736	-35.5699	-37.8611	-42.6165	-44.0209	-47.3613	-49.3508	-53.7668326112702*	-55.5521264299202*
48.761	0.923886	-3.02002	-5.77148	-7.42126	-12.8193	-15.7282	-18.8387	-21.7508	-24*		-30.4413	-32.9232	-35.653	-38.2842	-42.5963	-44.3664	-47.3464	-49.3538	-54.1528719264769*	-55.8473881790226*
48.9608	1.12502	-3.31275	-5.8646	-7.98309	-12.9912	-15.5575	-18.7891	-19.7524	-24*		-26.3632	-30.4447	-35.7983	-38.4013	-42.7916	-44.7667	-47.6356	-50.128	-54.2428229796705*	-56.1887787079816*
49.1606	0.973925	-3.58549	-6.09279	-8.05428	-12.7709	-15.7401	-18.7365	-20.0014	-24*		-27.8728	-31.4202	-35.8286	-38.8168	-42.7111	-44.9812	-47.7407	-49.9429	-53.969594856848*	-56.4329235397403*
49.3605	0.164144	-3.52801	-6.07407	-8.20718	-12.6561	-15.7383	-18.8119	-20.3973	-24*		-29.2862	-32.5172	-35.9782	-38.8463	-42.7634	-45.4766	-47.7838	-50.3028	-54.2568760808508*	-56.7155662928077*
49.5603	0.612833	-3.56561	-6.25091	-8.47176	-12.4895	-15.4713	-18.8259	-20.6084	-24*		-29.8224	-33.1895	-35.9561	-39.2701	-42.7525	-45.2203	-47.7958	-50.2448	-54.416205963499*	-56.7221589013313*
49.7602	0.257812	-3.27851	-6.06999	-8.47575	-12.8338	-15.4627	-18.8842	-20.9001	-24*		-30.0165	-34.1785	-36.1453	-39.1467	-42.6831	-45.3822	-48.0137	-50.8308	-54.4373220436745*	-57.0875893310068*
49.96

## Sheet: 5D
	Part																																												Full
Males	0.244444	0.466667	0.222222	0.161111	0.05	0.011111	0.038889	0.005556	0*	0.177778	0.183333	0.077778	0.005556	0.105556	0.027778	0.077778	0.116667	0.083333	0.044444	0.1	0.033333	0.127778	0.094444	0.044444	0.127778	0.033333	0.088889	0.011111	0.005556	0.016667*	0	0.133333	0.238889	0.133333	0.2	0.066667	0.005556	0.066667	0.105556	0.094444	0.255556	0.227778	0.177778		0	0.166667	0.194444	0.088889	0.144444
Females	0.272222	0.15	0.094444	0.194444	0.122222	0.15	0.166667	0.261111	0.122222	0.333333	0.072222	0.166667	0.144444	0*	0.077778	0.238889	0.033333	0.061111	0.044444	0.244444	0.111111	0.105556	0.077778	0.022222	0.055556	0.066667	0.161111	0.033333	0.105556	0.005556	0.05	0.011111	0.05*	0.005556*	0.005556	0.172222									0.172222	0.177778	0.177778	0.116667	0.055556
[truncated: 53 more columns]

## Sheet: 5E
	Full
Males	-0.18611	-0.38333	-0.13889	-0.07778	-0.03333	-0.01111	-0.01389	-0.00556	0.025*	-0.00278	-0.04167	-0.07778	0.052778	-0.05556	-0.02778	-0.03611	-0.05833	-0.06667	0.030556	-0.03333	-0.03333	-0.06111	-0.03611	-0.03611	-0.05278	-0.01667	-0.05556	0.005556	-0.00556	-0.01667*	0	-0.10833	-0.15556	-0.10833	-0.10833	-0.05833	-0.00556	-0.05	-0.09722	-0.08611	-0.20556	-0.15278	-0.15278
Females	-0.24722	-0.15	-0.07778	-0.17778	-0.12222	-0.14167	-0.15	-0.26111	-0.12222	-0.325	-0.07222	-0.16667	-0.11111	0*	-0.07778	-0.20556	-0.03333	-0.05278	-0.04444	-0.24444	-0.11111	-0.10556	-0.07778	-0.02222	-0.05556	-0.06667	-0.16111	-0.03333	-0.10556	-0.00556	-0.05	-0.01111	-0.05*	-0.00556*	-0.00556	-0.17222
	Part
Males	0.008333	-0.13333	-0.11944	-0.08056	-0.08611	0.136111	-0.09444	-0.01111*	-0.03889*	0.172222	0.013889	0.013889	0.027778	0.002778	-0.04444	-0.08889	0.011111	-0.12778	-0.08333	-0.03889	-0.11667	-0.04444	-0.02222	0.002778	-0.02778	-0.14444	-0.075	-0.175	-0.12778*	-0.28333*	-0.05556	-0.10278	-0.01111	-0.03889	-0.15556	-0.03333	-0.12222	-0.1	-0.01667	-0.02222	-0.00556	-0.1	0.002778
Females	-0.12222	-0.13611	-0.16944	-0.075	-0.04722	-0.11944	-0.14444	-0.01111	-0.10278	-0.00556	0*	-0.36944	-0.12222	-0.20278	-0.13333	-0.28611	-0.2	-0.16389	-0.29722	0.238889	-0.21944	-0.27222	-0.20278	-0.2	-0.14722	-0.03889	-0.15556	-0.07778	-0.10278	-0.07778	-0.04444	-0.07778	-0.00556*	-0.01667	-0.02778	-0.00278	-0.06111	-0.03056*	0.016667*	-0.24444	-0.12778	0.016667	-0.09444*	-0.03611	-0.16389	-0.24167	-0.13333	-0.125	-0.12778
[truncated: 9 more columns]

## Sheet: 5F
	Full Tone 3
Males	0	0.111111	0.044444	0.014815	0.081481	0.014815	0.014815	0	0.014815*	0.02963	0.044444	0	0.022222	0.022222	0	0.014815	0.022222	0	0.014815	0.022222	0.02963	0.014815	0.037037	0	0.037037	0.014815	0.014815	0.044444	0.014815	0*	0.014815	0.051852	0.037037	0.02963	0.014815	0.014815	0	0.014815	0.022222	0.037037	0.014815	0.044444	0.02963
Females	0.377778	0.155556	0.233333	0.322222	0.144444	0.166667	0.044444	0.022222	0.066667	0.177778	0.022222	0.066667	0.155556	0.022222*	0.033333	0.088889	0	0.022222	0	0.011111	0	0	0	0	0	0	0	0.011111	0.088889	0	0.011111	0	0.022222*	0*	0	0.155556
	Part Tone 4
Males	0.005556	0.144444	0.216667	0.05	0.144444	0.161111	0.022222	0*	0.011111*	0.077778	0.077778	0.005556	0	0.011111	0.111111	0.033333	0.027778	0.072222	0.027778	0.011111	0.033333	0.011111	0	0.005556	0.05	0.061111	0.05	0.055556	0.038889*	0.038889*	0.016667	0.044444	0.166667	0.027778	0.116667	0.005556	0.055556	0.016667	0.005556	0.011111	0	0.055556	0.044444
Females	0.044444	0.055556	0.027778	0.033333	0.011111	0.044444	0.061111	0	0.016667	0.022222	0.016667*	0.072222	0	0.077778	0.005556	0.05	0.011111	0.05	0.122222	0.166667	0.05	0.155556	0.122222	0.033333	0.038889	0.005556	0.055556	0	0.033333	0.005556	0.005556	0.016667	0*	0	0.038889	0.044444	0.022222	0.138889*	0.038889*	0.083333	0.105556	0.116667	0.016667*	0.033333	0.155556	0.066667	0.055556	0.05	0.055556
[truncated: 9 more columns]

## Sheet: 5G
	Full Tone 3
Males	0.066667	0.033333	0.166667	0.1	0	0	0	0	0*	0.133333	0.1	0	0.066667	0.066667	0	0.033333	0.066667	0	0.066667	0.066667	0.066667	0.033333	0	0	0.1	0.033333	0	0	0	0*	0	0.033333	0.1	0.033333	0.2	0	0	0.066667	0.066667	0.1	0.166667	0.133333	0.033333
Females	0.233333	0.1	0.133333	0.2	0.066667	0.166667	0.033333	0	0.066667	0.166667	0	0	0.066667	0.033333*	0	0	0	0	0	0	0	0	0	0	0	0	0	0	0.033333	0	0	0	0*	0*	0	0
	Part Tone 4
Males	0	0.033333	0.133333	0	0.033333	0.166667	0	0*	0*	0.066667	0	0	0	0	0.066667	0	0	0.2	0.066667	0.033333	0.133333	0.066667	0	0.033333	0	0	0	0	0*	0*	0	0.033333	0.133333	0	0.133333	0	0	0	0	0	0	0.033333	0.066667
Females	0	0.066667	0	0	0	0.033333	0.033333	0	0	0	0*	0	0	0	0	0	0	0	0.033333	0.2	0	0.1	0.066667	0	0.033333	0	0.033333	0	0	0	0	0	0*	0	0.033333	0.066667	0	0.1*	0.033333*	0	0.066667	0.166667	0*	0	0.1	0	0	0	0
[truncated: 9 more columns]

## Sheet: 5H
	Full shock 3
Males	0.1	0	0	0.4	0	0	0	0	0.1*	0.1	0	0	0.2	0	0	0	0	0	0	0	0	0	0.1	0	0	0	0	0	0	0*	0	0	0	0	0	0.1	0	0	0	0.1	0	0	0
Females	0.2	0.2	0.1	0.2	0	0.1	0	0	0.1	0.1	0	0	0.3	0.1*	0	0	0	0	0	0.2	0.1	0	0	0	0	0	0	0	0	0	0	0	0*	0*	0	0
	Part shock 3
Males	0	0	0.1	0	0.1	0.1	0	0*	0.1*	0	0	0	0	0	0.1	0	0	0.1	0	0	0	0	0	0	0	0.1	0.1	0	0*	0.1*	0	0	0.3	0	0	0	0	0	0	0	0	0	0
Females	0	0	0	0	0	0	0	0	0	0	0.1*	0	0	0	0	0	0	0	0	0	0	0	0	0	0	0	0	0	0	0	0	0	0.1*	0	0	0	0	0*	0*	0.1	0.1	0.1	0*	0	0.2	0.1	0.1	0.1	0.1
[truncated: 9 more columns]

## Sheet: 5I
Part								Full
Time	1	5	7	8	13	3		Time	10	11	15	20	1	2	4
-1.49008	-1.13433	-4.9274	-10.7272	-15.6923	-20.9407	-25.511		0.37992	-0.518492	-5.25214	-9.60143	-17.3816	-18.6886	-25.7627	-30.9302393986688*
-1.29024	-1.28433	-4.56949	-10.9343	-15.7253	-20.8621	-25.5554		0.57976	-0.465864	-5.53064	-9.64659	-17.4332	-18.8722	-26.1911	-30.667198259919*
-1.0904	-1.5599	-4.58565	-10.8741	-15.843	-20.8522	-25.2234		0.7796	-0.59872	-5.31766	-9.94046	-17.1555	-18.6835	-25.9733	-30.1784549768711*
-0.89056	-0.708038	-5.46794	-9.60474	-15.5009	-21.1654	-25.9602		0.97944	-0.627958	-5.49599	-9.83902	-17.2423	-18.6049	-25.5652	-31.1535797848617*
-0.69072	-1.06369	-5.19677	-10.2669	-15.5982	-21.1686	-25.8231		1.17928	-1.10265	-5.92345	-9.63282	-17.2015	-19.4679	-25.8024	-30.7425519075968*
-0.49088	-1.33998	-4.69275	-10.4982	-15.8934	-21.1681	-25.572		1.37912	-1.07279	-6.04902	-9.5393	-17.4392	-18.8733	-25.6474	-31.6311027837269*
-0.29104	-1.55023	-4.49238	-10.7639	-15.9552	-21.2192	-25.6797		1.57896	-1.38272	-6.40306	-9.45741	-16.808	-20.5378	-25.5473	-31.0958017258416*
-0.0912	-1.35668	-4.98546	-10.1275	-15.8275	-21.0933	-25.3307		1.7788	-0.765665	-5.61069	-9.5232	-17.1984	-20.0648	-25.5367	-31.4103310289465*
0.10864	-1.67393	-4.84661	-10.8968	-16.0707	-20.8065	-24.7788		1.97864	-0.736015	-5.49394	-9.42799	-17.193	-19.6925	-25.7656	-30.9511375600471*
0.30848	-1.24739	-4.50229	-10.5374	-15.7837	-20.7371	-25.3818		2.17848	-1.16387	-5.90942	-9.40038	-16.7573	-21.3814	-25.2399	-31.2015506936126*
0.50832	-1.15203	-4.92873	-10.4016	-15.7754	-20.7813	-25.4083		2.37832	-1.02766	-5.8086	-9.24755	-17.0492	-20.1325	-25.1781	-30.7175035438088*
0.70816	-1.38958	-4.96961	-11.0743	-15.8522	-20.7329	-25.3174		2.57816	-1.38662	-6.11545	-9.28345	-16.9341	-21.1259	-25.2352	-31.4490326671245*
0.908	-0.774447	-5.35365	-9.80443	-15.6018	-20.9004	-25.5328		2.778	-1.06736	-5.83188	-9.39031	-16.7149	-20.544	-24.7267	-31.0333690174068*
1.10784	-0.97708	-5.08224	-10.1876	-15.6711	-20.9538	-26.1414		2.97784	-0.822212	-5.38848	-9.64322	-17.0243	-20.2626	-25.7838	-30.9877950279456*
1.30768	-0.913107	-5.43724	-9.93938	-15.542	-20.9738	-25.6266		3.17768	-0.780815	-5.76748	-9.68438	-17.2485	-20.134	-25.4238	-31.3782424681179*
1.50752	-1.19472	-4.88649	-10.6064	-15.7088	-20.9488	-25.6054		3.37752	-0.877314	-5.82618	-9.70821	-17.0794	-20.4582	-25.6172	-31.003612329951*
1.70736	-1.15308	-5.318	-10.2789	-15.8034	-20.9914	-25.6885		3.57736	-0.912499	-5.82054	-9.78127	-17.2467	-20.5891	-25.6241	-31.1959824447305*
1.9072	-1.14269	-5.4075	-10.6836	-15.9056	-20.9653	-25.7847		3.7772	-1.21476	-6.27391	-9.77595	-17.1144	-20.1789	-25.1967	-31.4318516751996*
2.10704	-1.09917	-5.27257	-10.435	-15.8278	-21.0267	-25.9908		3.97704	-0.728696	-5.84321	-9.9625	-17.1377	-20.0954	-25.9454	-31.3324201215199*
2.30688	-1.35751	-5.09089	-10.0682	-15.9281	-20.9533	-25.6313		4.17688	-0.375217	-5.1485	-10.1282	-16.9655	-20.1284	-25.7686	-30.2687206056582*
2.50672	-0.837614	-5.37722	-9.70918	-15.8491	-20.979	-25.8418		4.37672	-0.56694	-5.45234	-9.96355	-17.1524	-19.7453	-25.7178	-30.8932896790114*
2.70656	-0.858184	-5.36532	-10.9788	-15.9172	-21.0052	-25.8063		4.57656	-0.701485	-5.85479	-9.65491	-17.0411	-20.8565	-25.9021	-30.9396016894514*
2.9064	-0.96116	-5.44146	-9.59254	-15.69	-20.9038	-26.1655		4.7764	-0.84566	-5.78422	-9.78336	-16.9352	-20.0487	-25.328	-30.9805183002986*
3.10624	-1.10374	-5.27217	-10.0385	-15.8937	-20.9655	-25.6529		4.97624	-0.940388	-5.73187	-9.76605	-16.9079	-20.911	-25.8409	-30.5491813138388*
3.30608	-1.21372	-4.79548	-10.3831	-15.7578	-20.8232	-25.4781		5.17608	-0.987175	-5.60504	-9.74642	-16.8757	-20.4182	-25.6636	-30.931106601748*
3.50592	-0.903586	-5.40824	-9.91974	-15.7895	-20.9152	-25.5749		5.37592	-0.62279	-5.23022	-9.70813	-17.0524	-19.8874	-25.7114	-31.7911296124093*
3.70576	-1.04092	-5.2214	-10.574	-15.8722	-20.9518	-25.392		5.57576	-0.662313	-5.33712	-9.74842	-17.0004	-19.9452	-25.7122	-31.1840276420415*
3.9056	-1.03758	-4.86739	-10.689	-15.8137	-20.8344	-25.6675		5.7756	-0.888689	-5.54572	-9.71753	-16.992	-21.1716	-25.6575	-30.8059912357087*
4.10544	-0.719232	-6.17008	-9.87368	-15.5668	-20.9379	-25.9925		5.97544	-0.873911	-5.45915	-9.71825	-16.9401	-20.0658	-25.5832	-30.9300649573466*
4.30528	-1.16598	-5.02892	-10.5891	-15.8146	-20.91	-25.7585		6.17528	-1.05582	-5.76309	-9.55814	-16.8753	-21.4812	-25.8627	-30.6199005536634*
4.50512	-0.84794	-5.61563	-9.7069	-15.7663	-20.9639	-26.0469		6.37512	-0.846284	-5.95268	-9.64686	-17.06	-20.7359	-25.3918	-30.9690133606283*
4.70496	-0.671331	-5.52376	-9.44433	-15.6303	-21.0126	-25.9478		6.57496	-0.680377	-5.93393	-9.65509	-17.1072	-20.4206	-25.8396	-31.1738622843634*
4.9048	-0.957052	-5.25742	-10.0342	-15.851	-20.9367	-25.544		6.7748	-0.743074	-5.78966	-9.37993	-17.0649	-19.8008	-25.7544	-30.8732694100762*
5.10464	-1.18958	-5.16129	-9.78145	-15.8095	-20.653	-25.2981		6.97464	-0.760005	-6.0563	-9.21792	-17.1661	-19.7786	-25.9191	-30.8002960790589*
5.30448	-1.2545	-4.56804	-10.844	-15.9864	-20.6166	-25.2982		7.17448	-0.654938	-5.56111	-9.31407	-17.1496	-19.7648	-25.7926	-30.539161513457*
5.50432	-1.58339	-4.339	-10.7778	-16.082	-20.4521	-24.4375		7.37432	-1.01895	-5.5965	-9.42096	-16.9433	-19.9953	-25.0126	-31.8306172599871*
5.70416	-1.28946	-5.24805	-10.3184	-15.8934	-20.7974	-25.4219		7.57416	-0.51849	-5.1969	-9.41739	-17.1588	-19.9297	-25.8566	-30.5086629386568*
5.904	-1.06772	-5.64849	-10.2682	-15.8827	-20.7527	-25.0208		7.774	-0.547864	-5.36398	-9.60839	-16.9959	-19.6892	-25.4352	-30.642526525635*
6.10384	-0.918436	-5.29195	-9.78196	-15.7383	-20.6927	-25.4485		7.97384	-0.888804	-5.62445	-9.40808	-16.8715	-20.9776	-25.3253	-30.8105367171511*
6.30368	-0.53867	-5.94665	-8.97414	-15.7119	-20.9035	-26.3329		8.17368	-0.762306	-5.5022	-9.31291	-17.0287	-20.6378	-25.5877	-30.9438415005717*
6.50352	-0.618299	-5.7394	-9.79304	-15.8438	-20.8833	-25.6662		8.37352	-0.480819	-5.19457	-9.55003	-17.003	-19.9262	-25.5929	-30.8097782271776*
6.70336	-0.732669	-5.19441	-9.88883	-15.7147	-20.6814	-26.001		8.57336	-0.742426	-5.28979	-9.40655	-17.0043	-20.5509	-25.7605	-31.2205220402815*
6.9032	-0.99546	-3.91126	-10.1031	-15.5875	-20.6485	-25.8553		8.7732	-0.690651	-5.28328	-9.39814	-17.0465	-20.592	-25.5335	-31.1515838304367*
7.10304	-1.01041	-4.32227	-9.83162	-15.637	-20.6369	-25.6273		8.97304	-0.979548	-5.59866	-9.3368	-16.8636	-20.8005	-25.3584	-31.2518023032493*
7.30288	-0.838857	-5.05067	-9.45463	-15.586	-20.7819	-26.2292		9.17288	-1.33569	-6.31558	-9.47762	-16.5883	-22.0466	-25.6077	-30.4952602957365*
7.50272	-0.791065	-5.38444	-9.8573	-15.6754	-20.8623	-25.6567		9.37272	-0.708248	-6.08226	-9.45389	-16.9081	-21.2828	-25.7267	-30.6108334712724*
7.70256	-0.735711	-4.64391	-10.1065	-15.5297	-20.8013	-25.8053		9.57256	-0.816446	-5.77011	-9.64204	-16.9141	-21.1033	-26.0248	-31.189808541036*
7.9024	-0.0444245	-0.739725	-8.07224	-13.6499	-18.6606	-20.5016		9.7724	-0.985486	-5.94802	-9.5499	-16.826	-20.8721	-25.7615	-30.9830055105985*
8.10224	-0.219277	0.604248	-6.45784	-12.3527	-17.6621	-18.7919		9.97224	-0.634774	-5.44694	-9.89157	-16.8977	-20.2722	-25.7838	-30.6273956172548*
8.30208	-0.333233	-1.13923	-7.46424	-11.9047	-18.386	-18.9597		10.1721	-0.687363	-5.44685	-9.74264	-17.0095	-19.9922	-25.9927	-30.7967083191392*
8.50192	-0.876795	-0.809045	-7.83175	-12.3514	-18.4175	-20.3454		10.3719	-0.793837	-5.60349	-9.71827	-16.9588	-20.1106	-24.8051	-31.3883871293679*
8.70176	-0.952234	-1.34038	-7.86421	-12.7933	-18.6023	-20.4044		10.5718	-0.642757	-5.57955	-9.70442	-17.0004	-19.388	-26.0061	-30.1654690599413*
8.9016	-1.02811	-2.73707	-8.68682	-13.1359	-18.9497	-20.4643		10.7716	-0.614819	-5.47369	-9.88291	-17.2052	-19.732	-25.5142	-30.5285638051224*
9.10144	-1.50532	-2.56011	-9.16341	-13.3231	-18.9269	-21.4226		10.9714	-0.96915	-5.64332	-9.50467	-17.0338	-20.0004	-25.479	-30.8525324988902*
9.30128	-1.03125	-3.96733	-8.3482	-13.5969	-18.9725	-20.6763		11.1713	-0.633291	-5.59625	-9.51616	-17.1832	-19.3337	-25.5621	-31.3238490711026*
9.50112	-1.1352	-3.79317	-8.36991	-13.4068	-19.2029	-22.6189		11.3711	-0.729928	-5.77295	-9.58657	-17.097	-19.7284	-25.6529	-31.1853672240337*
9.70096	-1.18673	-3.37974	-8.76759	-13.518	-19.2751	-23.0769		11.571	-0.63996	-5.58577	-9.76481	-17.0867	-19.2869	-25.4356	-31.1790373011123*
9.9008	-1.10397	-4.09135	-9.07986	-13.471	-19.0679	-23.335		11.7708	-0.633958	-5.54372	-9.72076	-17.1626	-19.35	-25.6241	-30.838052277111*
10.1006	-1.17963	-3.91182	-8.98172	-13.5863	-19.0768	-23.7229		11.9706	-0.730009	-5.55094	-9.6779	-17.213	-19.7828	-25.6969	-31.1943708525409*
10.3005	-1.01576	-3.48769	-8.36298	-13.4873	-18.9633	-24.4877		12.1705	-0.761559	-5.62303	-9.85644	-17.1379	-19.6838	-25.7309	-30.7670701244199*
10.5003	-1.17643	-4.37465	-8.52495	-13.605	-19.0158	-24.5532		12.3703	-1.15056	-6.03324	-9.37242	-16.7484	-20.824	-25.4234	-30.9875546309734*
10.7002	-0.878559	-4.69867	-9.05989	-13.7614	-19.3318	-24.0691		12.5702	-0.740496	-5.51126	-9.69686	-17.0279	-19.1588	-26.0928	-30.8026604753902*
10.9	-0.624787	-5.38833	-8.68731	-13.7298	-19.6818	-24.4597		12.77	-0.449903	-5.172	-9.85728	-17.1813	-19.5802	-25.9609	-30.376619727615*
11.0998	-0.634049	-4.90565	-9.31056	-13.893	-19.6261	-24.3866		12.9698	-0.485787	-5.14427	-10.0314	-17.0001	-20.0435	-25.7106	-30.1777650580301*
11.2997	-0.70102	-5.05803	-9.05944	-13.8834	-19.6339	-24.9207		13.1697	-0.603418	-5.35173	-9.77259	-17.0297	-19.3915	-25.8425	-30.7640602724531*
11.4995	-0.876301	-5.3376	-9.19238	-14.2336	-19.696	-24.7549		13.3695	-0.694878	-5.52483	-9.79923	-17.0807	-19.2766	-25.5578	-30.4974711746068*
11.6994	-1.10316	-4.57397	-9.34706	-14.4389	-19.4206	-24.9534		13.5694	-0.915324	-5.53665	-9.72202	-16.9688	-20.4368	-25.2724	-30.5498395057378*
11.8992	-1.12573	-4.53472	-9.93161	-14.3334	-19.3992	-24.676		13.7692	-0.783127	-5.78511	-9.7981	-17.1943	-19.2632	-25.7789	-31.3418858944428*
12.099	-1.227	-4.2384	-9.93775	-14.3838	-19.5531	-24.7599		13.969	-0.814168	-5.61904	-9.81516	-17.0816	-19.2574	-25.5785	-30.6506538537321*
12.2989	-0.942428	-1.02745	-9.38116	-13.8178	-18.1103	-23.9679		14.1689	-0.948518	-5.89432	-9.66594	-17.1543	-20.2197	-25.7115	-30.3485535516954*
12.4987	-0.944752	-1.486	-9.45254	-13.8834	-17.8856	-23.456		14.3687	-1.11219	-6.03663	-9.6638	-16.9119	-20.1715	-25.6005	-31.0188187461787*
12.6986	-1.16755	-2.5494	-9.65244	-13.8578	-18.2743	-23.7522		14.5686	-0.687592	-5.40055	-9.75772	-17.0634	-19.5808	-26.1801	-30.5367586809022*
12.8984	-0.811228	-2.77843	-10.1834	-13.7491	-18.4491	-23.6054		14.7684	-0.634739	-5.50691	-9.72115	-17.0681	-19.7071	-25.5225	-30.9056795615563*
13.0982	-0.884752	-2.85178	-10.3796	-13.8273	-18.6278	-23.7901		14.9682	-0.739929	-5.6751	-9.64468	-17.0388	-19.5457	-25.3791	-30.9103371676036*
13.2981	-0.89966	-3.29928	-10.0194	-14.0115	-18.6136	-24.0598		15.1681	-0.511921	-5.37052	-9.70813	-17.0839	-19.7859	-25.9144	-31.1477511248793*
13.4979	-0.980863	-3.20863	-9.31633	-13.9979	-18.511	-24.8028		15.3679	-0.769653	-5.6938	-9.65157	-17.0248	-20.6053	-25.7181	-31.0798008851829*
13.6978	-0.850446	-3.76684	-9.2328	-14.0581	-18.6483	-24.4416		15.5678	-0.818162	-5.54029	-9.76938	-17.0477	-19.7543	-25.5811	-30.6858143558118*
13.8976	-0.493358	-4.99013	-9.30108	-13.9173	-19.0263	-24.5782		15.7676	-1.08132	-6.00883	-9.48944	-17.014	-20.5484	-25.8713	-31.5648694378266*
14.0974	-0.623026	-4.03055	-9.56289	-14.0718	-19.0967	-24.8228		15.9674	-0.89361	-5.67101	-9.65862	-17.0245	-19.3777	-25.6454	-30.9596035362912*
14.2973	-0.608309	-5.24125	-9.17653	-14.1453	-19.2407	-25.0042		16.1673	-0.918105	-5.65795	-9.7568	-17.0696	-20.0741	-25.9407	-31.0482283704562*
14.4971	-0.732852	-5.29953	-10.184	-14.2823	-19.2495	-25.2174		16.3671	-1.06415	-6.08235	-9.6893	-17.0278	-20.7889	-25.4713	-31.2868659187537*
14.697	-0.52931	-5.50553	-9.7347	-14.1829	-19.3872	-25.3475		16.567	-0.535831	-5.74379	-9.77565	-17.2145	-20.0428	-25.4907	-31.20442726968*
14.8968	-0.764502	-4.89393	-9.97785	-14.6074	-19.4676	-25.2145		16.7668	-0.641936	-5.47778	-9.82993	-17.0145	-19.4192	-25.905	-30.8488264736673*
15.0966	-1.18383	-4.54892	-10.1199	-14.4421	-19.1365	-25.2513		16.9666	-0.767842	-5.65774	-9.58539	-17.191	-19.4748	-25.7937	-31.3057633496081*
15.2965	-1.13022	-2.8803	-10.37	-13.6868	-19.0237	-24.3203		17.1665	-0.567938	-5.49763	-9.75814	-17.158	-19.6394	-25.4303	-30.5040110184414*
15.4963	-1.11968	-2.65772	-10.5029	-13.8011	-19.1258	-24.1362		17.3663	-0.512243	-5.56698	-9.65841	-17.1851	-19.3114	-25.9358	-31.1774043301948*
15.6962	-0.892403	-4.29743	-10.6147	-13.8696	-19.2382	-24.5307		17.5662	-0.953791	-5.86959	-9.37194	-17.0081	-20.3452	-25.2611	-30.9499485388832*
15.896	-0.944292	-3.39996	-10.197	-14.0543	-19.2106	-24.5963		17.766	-0.858151	-5.67963	-9.42617	-17.0507	-20.1919	-25.5475	-30.5699396037527*
16.0958	-1.14616	-3.65116	-10.7032	-14.251	-19.301	-25.0673		17.9658	-0.893682	-5.83283	-9.43741	-16.959	-20.7659	-25.7858	-30.6681646239063*
16.2957	-1.0913	-4.33072	-10.5856	-14.2306	-19.2239	-24.61		18.1657	-0.863077	-5.84744	-9.47309	-17.0789	-19.8528	-25.6884	-31.387983435304*
16.4955	-1.19075	-4.2068	-10.5381	-14.1206	-19.3065	-24.6881		18.3655	-0.990543	-6.04778	-9.45799	-17.2685	-20.5776	-25.2941	-30.5719335112782*
16.6954	-1.09431	-4.55978	-11.1182	-14.328	-19.4905	-24.8899		18.5654	-1.13682	-6.00131	-9.45423	-16.9605	-20.3592	-25.5318	-30.9064485134605*
16.8952	-1.08874	-3.43193	-10.846	-14.179	-19.1386	-23.9675		18.7652	-1.23967	-5.98161	-9.52164	-16.8222	-21.0248	-25.5985	-30.4560815025467*
17.095	-0.872536	-1.63224	-11.6938	-13.4179	-18.8299	-22.9749		18.965	-1.10923	-5.89931	-9.54268	-17.0414	-20.4756	-25.4434	-30.932771413324*
17.2949	-0.553291	-0.70126	-10.9116	-12.6872	-17.9509	-21.8614		19.1649	-0.777278	-5.82785	-9.57791	-17.1648	-19.5981	-25.8813	-31.0189661229412*
17.4947	-0.597668	-3.55309	-10.4686	-12.6046	-18.7046	-22.0773		19.3647	-0.848196	-5.54497	-9.72115	-17.0002	-20.2275	-25.4468	-30.6356123266291*
17.6946	-0.943083	-2.76363	-10.7849	-12.9531	-18.8699	-22.51		19.5646	-0.662771	-5.44984	-9.75645	-17.1437	-19.512	-25.7265	-31.1614589832553*
17.8944	-0.659347	-4.10273	-10.1002	-12.8088	-19.0532	-22.8491		19.7644	-0.895084	-5.92422	-9.53092	-17.1782	-20.0734	-25.3598	-30.8152102435277*
18.0942	-0.853104	-3.86125	-10.3276	-13.147	-18.8986	-22.9769		19.9642	-0.867019	-5.9614	-9.78979	-17.2347	-20.1193	-25.7102	-30.9262006385639*
18.2941	-0.857028	-1.72382	-11.6341	-12.5183	-18.2316	-21.4019		20.1641	-0.858148	-5.79191	-9.70809	-17.1884	-20.0682	-25.5981	-31.3341513436124*
18.4939	-1.02989	-1.00363	-10.5641	-11.7805	-17.3049	-20.4902		20.3639	-0.866088	-5.76929	-9.84579	-17.0732	-19.7178	-25.668	-31.3108874213032*
18.6938	-0.915225	-2.154	-10.7298	-11.8554	-17.5493	-20.9259		20.5638	-0.8977	-5.91369	-9.5988	-17.2436	-19.8675	-25.6428	-31.1642293479831*
18.8936	-1.06799	-2.93183	-10.2802	-12.0562	-17.8768	-21.1052		20.7636	-1.02276	-6.04752	-9.67811	-17.1593	-20.2847	-25.5354	-31.6787875814173*
19.0934	-1.07791	-3.22802	-9.99771	-12.0453	-17.7599	-22.3035		20.9634	-0.590239	-5.59608	-9.88561	-17.2577	-19.213	-25.7558	-30.73742146777*
19.2933	-0.885108	-3.9728	-9.53083	-12.0627	-18.1881	-22.4895		21.1633	-0.515163	-5.19708	-10.0393	-16.9433	-19.8195	-25.5726	-30.225238320031*
19.4931	-0.898728	-4.52271	-9.90484	-12.3915	-18.3179	-22.7522		21.3631	-0.604628	-5.34878	-9.9026	-17.0872	-18.8175	-25.5899	-30.5823763375523*
19.693	-0.61196	-4.72035	-9.11324	-12.3398	-18.2272	-23.5211		21.563	-0.645389	-5.40618	-10.0368	-17.1307	-19.325	-25.8076	-30.7011092435836*
19.8928	-0.2634	-5.47957	-8.53288	-12.2166	-18.8927	-23.2197		21.7628	-0.838737	-5.56867	-9.8743	-16.9846	-19.5714	-25.5953	-30.8286349474758*
20.0926	-0.50436	-5.62549	-8.77152	-12.5717	-18.8839	-23.9928		21.9626	-0.933294	-5.38783	-9.78777	-17.0014	-20.2616	-26.0407	-30.8118098886269*
20.2925	-0.869574	-5.86442	-9.15846	-12.7283	-18.8893	-23.6613		22.1625	-0.991368	-5.58436	-9.69098	-16.9186	-20.2605	-25.7919	-29.9475530028537*
20.4923	-0.66492	-5.90447	-9.41045	-12.8391	-18.9999	-24.2305		22.3623	-0.47834	-5.26274	-9.8866	-17.1756	-20.4044	-25.6121	-29.7654635316796*
20.6922	-0.650151	-5.43939	-9.56266	-13.0107	-19.0239	-24.2182		22.5622	-0.828904	-5.6531	-9.64256	-17.0801	-20.689	-25.8988	-29.7669225161414*
20.892	-0.732718	-5.29244	-9.22711	-12.9205	-19.1292	-24.5776		22.762	-0.637511	-5.37611	-9.8594	-17.1272	-19.7421	-25.6852	-30.2150529482247*
21.0918	-0.738205	-5.70184	-9.49225	-13.1022	-19.0987	-24.2521		22.9618	-0.888255	-5.55242	-9.5624	-17.0982	-19.9863	-25.7817	-30.1156142076535*
21.2917	-1.02884	-5.13195	-9.22758	-13.3296	-18.6832	-24.9126		23.1617	-0.837069	-5.76683	-9.67542	-16.9575	-20.1677	-25.6243	-30.8580209186926*
21.4915	-1.19117	-5.29507	-9.72863	-13.5359	-18.8752	-24.8577		23.3615	-1.01503	-5.95749	-9.69219	-16.8616	-19.8222	-25.9133	-30.8616011733142*
21.6914	-0.746905	-5.66373	-9.47271	-13.2767	-19.035	-24.7541		23.5614	-0.832021	-5.82826	-9.73208	-17.1612	-20.0738	-25.8012	-30.6274943232963*
21.8912	-0.951903	-5.18442	-9.49782	-13.6007	-19.1106	-24.618		23.7612	-0.53774	-5.32664	-9.85729	-17.0776	-20.43	-25.775	-29.7850820397337*
22.091	-1.06696	-5.0871	-10.4306	-13.7115	-18.8634	-24.708		23.961	-0.647721	-5.3971	-9.93406	-17.0539	-19.144	-25.4531	-30.5815348344333*
22.2909	-0.874735	-5.32001	-9.97266	-13.6844	-18.9616	-25.0044		24.1609	0.601083	-5.11204	-9.55462	-16.0078	-18.9171	-23.592	-29.8593714588859*
22.4907	-0.735986	-5.37596	-9.95409	-13.6771	-19.076	-25.303		24.3607	0.165545	-5.34035	-9.30301	-16.3274	-20.1247	-24.2272	-30.2516105729153*
22.6906	-0.962531	-5.59447	-10.101	-13.9842	-18.9646	-24.9315		24.5606	-0.10452	-5.36918	-9.33611	-16.6379	-20.3204	-24.389	-29.8900330578579*
22.8904	-0.724051	-5.54713	-9.63796	-13.8447	-19.2653	-25.1785		24.7604	-0.21205	-5.37235	-9.29171	-16.5172	-20.0814	-24.7333	-29.7611345667153*
23.0902	-0.817116	-5.35714	-9.80332	-13.8904	-19.2334	-25.1626		24.9602	-0.107775	-5.26905	-9.47953	-16.7907	-19.9065	-25.0762	-30.6187067564007*
23.2901	-0.775777	-5.50404	-9.84618	-13.9739	-19.2998	-25.1292		25.1601	-0.211475	-5.27852	-9.33348	-16.8206	-19.9189	-24.9983	-30.418977128262*
23.4899	-0.857469	-6.02393	-9.43127	-14.019	-19.3177	-25.4985		25.3599	-0.586451	-5.5775	-9.22683	-16.7332	-20.7843	-24.9373	-30.472497408933*
23.6898	-0.732862	-5.74856	-9.6244	-14.0716	-19.2031	-25.4133		25.5598	-0.520394	-5.45107	-9.19349	-16.7895	-20.3407	-25.3366	-30.3476786158849*
23.8896	-0.515906	-5.13616	-9.72182	-14.0325	-19.1978	-25.7825		25.7596	-0.513781	-5.53841	-9.14472	-16.7625	-21.1015	-25.0452	-30.5762793063049*
24.0894	-0.524988	-5.86315	-9.8272	-14.1754	-19.299	-25.2292		25.9594	-0.354953	-5.75098	-9.14402	-16.9549	-20.0454	-25.4385	-31.0480960042899*
24.2893	-0.624542	-5.36166	-9.80184	-14.117	-19.2871	-25.0738		26.1593	-0.280001	-5.57285	-9.12816	-17.2329	-19.8606	-25.2966	-30.9604677827378*
24.4891	-0.63004	-5.02441	-9.5609	-14.1181	-19.3935	-25.8483		26.3591	-0.29124	-5.69983	-9.18495	-16.8303	-19.2409	-24.8768	-30.717374134275*
24.689	-0.706496	-5.22381	-10.0925	-14.3141	-19.3115	-25.2906		26.559	-0.357663	-5.56298	-9.31885	-17.0015	-19.7607	-25.6428	-31.0828903387962*
24.8888	-0.726886	-5.68396	-10.1182	-14.2846	-19.4546	-25.2824		26.7588	0.202395	-5.50382	-8.6397	-16.3531	-18.5368	-24.0974	-29.2634173124593*
25.0886	-0.75287	-5.40409	-9.9717	-14.1461	-19.5213	-25.4677		26.9586	1.21085	-5.5531	-7.2154	-15.3982	-19.5323	-21.4994	-27.4801871431598*
25.2885	-0.456846	-5.86668	-10.0574	-14.1259	-19.5519	-25.6804		27.1585	0.825	-6.38117	-7.13057	-14.9763	-20.5338	-21.7925	-27.3779149478701*
25.4883	-0.571941	-5.90903	-10.1328	-14.1555	-19.5165	-25.3229		27.3583	1.17396	-6.25211	-7.78522	-15.4691	-20.8824	-22.691	-27.4868304691347*
25.6882	-0.516742	-5.53586	-9.9411	-14.2494	-19.5575	-25.1648		27.5582	1.33034	-5.74915	-7.95097	-15.8699	-18.8919	-23.0427	-27.6282257364617*
25.888	-0.86512	-5.28216	-10.3788	-14.544	-19.4557	-25.3316		27.758	1.7227	-5.11	-8.55293	-15.732	-18.151	-23.4803	-27.3514144226185*
26.0878	-0.554946	-5.83118	-10.5507	-14.3903	-19.5264	-25.4943		27.9578	1.34812	-5.04766	-8.64898	-15.8313	-20.0078	-23.227	-27.366545558432*
26.2877	-0.659002	-5.65162	-10.2807	-14.3004	-19.6181	-24.9916		28.1577	1.07204	-5.418	-8.65472	-15.997	-19.3576	-23.8894	-28.086106915362*
26.4875	-0.69145	-5.05043	-9.93534	-14.0939	-19.5196	-24.8639		28.3575	0.829901	-5.55949	-8.69318	-15.9613	-19.4999	-23.8272	-28.7464103049487*
26.6874	-0.571399	-5.29764	-10.4591	-13.8482	-19.573	-24.1719		28.5574	0.998346	-5.52338	-8.76612	-16.0957	-19.3439	-24.3294	-28.5768954148824*
26.8872	-0.6945	-5.5727	-10.1149	-14.0033	-19.5633	-24.8868		28.7572	0.646622	-5.65091	-8.65283	-16.2651	-20.1992	-25.0053	-29.8021873873512*
27.087	-0.763363	-4.77555	-10.1723	-13.9281	-19.3621	-25.1776		28.957	0.462558	-5.82523	-8.50758	-16.0718	-20.2145	-24.56	-29.791755318671*
27.2869	-0.699006	-3.73004	-10.0158	-14.0864	-19.3742	-24.8484		29.1569	0.489976	-5.65596	-8.55231	-16.2151	-20.6454	-24.4836	-30.3609764120653*
27.4867	-0.329161	-4.4389	-9.19546	-13.8037	-19.5302	-25.4483		29.3567	0.500639	-5.80102	-8.51473	-16.2687	-19.6752	-24.5361	-29.5803035065974*
27.6866	-0.534388	-5.01661	-9.92909	-14.1395	-19.6572	-24.8631		29.5566	0.774771	-5.35729	-9.13624	-16.1777	-19.8811	-25.3317	-29.2312536986497*
27.8864	-0.741715	-5.37124	-9.97549	-14.1682	-19.6	-24.8744		29.7564	0.908149	-5.14496	-9.31461	-16.1034	-20.2823	-25.4527	-29.3341620248107*
28.0862	-0.639627	-4.89337	-10.366	-14.0385	-19.5844	-25.5586		29.9562	0.811087	-5.24146	-9.26426	-16.2339	-19.3699	-25.2557	-28.9669434822231*
28.2861	-0.358265	-2.86226	-10.4079	-13.8246	-19.2384	-23.4049		30.1561	0.662368	-5.19217	-9.10465	-16.2141	-19.2942	-25.2899	-29.7270652894911*
28.4859	-0.685111	-3.55002	-9.8581	-14.0172	-19.3556	-24.1131		30.3559	0.400069	-5.25549	-9.33952	-16.1016	-20.042	-25.4195	-29.9760705883384*
28.6858	-0.7996	-3.90912	-9.63169	-14.1739	-19.2771	-24.631		30.5558	0.404355	-5.18607	-9.36099	-16.408	-19.671	-24.9631	-30.0494740639095*
28.8856	-0.672716	-4.67194	-9.80195	-14.1239	-19.4553	-24.6433		30.7556	0.130941	-5.43071	-9.21238	-16.1833	-20.2387	-25.3339	-29.9409045368868*
29.0854	-0.703908	-4.6958	-9.4594	-14.1092	-19.5218	-25.1081		30.9554	0.395799	-5.12968	-9.52884	-16.3225	-20.4957	-25.2859	-30.5326616978788*
29.2853	-0.687107	-4.89683	-10.3582	-14.2029	-19.5641	-24.7287		31.1553	0.216718	-5.42792	-9.38748	-16.193	-19.8832	-25.3006	-30.0220928396881*
29.4851	-0.789162	-4.83386	-10.4879	-14.2897	-19.456	-24.6828		31.3551	0.110911	-5.5037	-9.28503	-16.2688	-19.7081	-25.2265	-30.1491270238828*
29.685	-0.75086	-5.26784	-10.1193	-14.2212	-19.4864	-25.1158		31.555	0.13297	-5.57953	-9.2303	-16.2502	-20.1859	-25.3143	-29.9840821438009*
29.8848	-1.17107	-4.35447	-10.2335	-14.625	-19.4242	-24.9037		31.7548	0.0107231	-5.5967	-9.26205	-16.2207	-19.8568	-25.3206	-29.8661386222793*
30.0846	-1.00684	-4.79384	-10.729	-14.3609	-19.3837	-24.8673		31.9546	0.101021	-5.37101	-9.49186	-16.2876	-20.2077	-25.4702	-31.5425377645134*
30.2845	-0.697834	-3.08371	-9.9503	-13.8264	-19.2001	-24.2345		32.1545	0.184309	-5.24254	-9.66939	-16.3287	-19.342	-25.3476	-29.9242981778756*
30.4843	-0.817036	-3.26352	-10.2836	-13.8665	-19.3824	-24.1898		32.3543	0.216049	-5.6984	-9.44038	-16.2513	-19.9585	-25.1628	-30.9086509772996*
30.6842	-0.832373	-4.0122	-10.2817	-14.0996	-19.3701	-24.6917		32.5542	-0.248092	-5.82895	-9.08555	-16.1641	-20.0349	-24.8521	-30.7397703986385*
30.884	-0.805192	-4.36406	-10.3454	-14.2582	-19.465	-24.6171		32.754	-0.286647	-5.7864	-9.69957	-16.0281	-19.6898	-25.2166	-31.0310494254308*
31.0838	-0.847698	-4.84423	-10.41	-14.3088	-19.4207	-24.6733		32.9538	0.109319	-5.67092	-9.41558	-16.4738	-18.7308	-25.7651	-30.6729441341892*
31.2837	-0.63229	-4.48237	-10.3314	-14.0194	-19.6279	-24.3676		33.1537	-0.447962	-5.91079	-9.4987	-16.2289	-19.9004	-25.6567	-30.4703761387732*
31.4835	-0.511987	-3.75161	-10.6852	-13.4985	-19.3249	-23.6389		33.3535	-0.299702	-5.8188	-9.51881	-16.2687	-19.6754	-25.4053	-30.68131822739*
31.6834	-0.852747	-3.71119	-10.8324	-13.5885	-19.3127	-24.0808		33.5534	-0.345944	-6.06759	-9.13858	-16.155	-20.3078	-25.7002	-31.0423182893612*
31.8832	-0.777153	-4.25156	-10.6755	-13.8067	-19.5811	-24.0308		33.7532	0.0489078	-5.64494	-9.39692	-16.4192	-19.384	-25.8784	-30.4068701727117*
32.083	-0.738381	-3.34023	-10.5303	-13.2262	-19.3844	-23.6062		33.953	-0.175274	-5.48479	-9.32795	-16.2948	-20.2975	-25.2519	-29.9262591985496*
32.2829	-0.638826	-3.36307	-10.3409	-13.2871	-19.4465	-23.797		34.1529	0.0907754	-5.40745	-9.66957	-16.2337	-19.4625	-25.3222	-30.3630631123672*
32.4827	-0.274282	-1.09652	-11.2272	-13.1813	-18.4239	-23.639		34.3527	0.141255	-5.48801	-9.62719	-16.4295	-19.3711	-25.4469	-30.4271829208391*
32.6826	-0.279186	-3.13895	-10.6305	-13.4129	-18.8114	-23.4654		34.5526	0.223373	-5.50444	-9.60053	-16.6705	-19.2028	-25.7813	-30.8767725648175*
32.8824	-0.463211	-3.6937	-10.8064	-13.4823	-18.9617	-23.5927		34.7524	-0.296736	-5.43447	-9.6171	-16.4355	-18.5637	-25.681	-30.028063791025*
33.0822	-0.52934	-3.90488	-10.4443	-13.6065	-19.0206	-23.8636		34.9522	-0.0566025	-5.39105	-9.47749	-16.3409	-19.3872	-25.483	-30.4109830760644*
33.2821	-0.13224	-2.27546	-10.5857	-12.9775	-17.9845	-22.336		35.1521	-0.242975	-5.40123	-9.47707	-16.4076	-20.8839	-25.3679	-30.9800145355935*
33.4819	-0.017915	-0.818942	-9.84669	-12.5036	-17.3011	-22.2752		35.3519	-0.25864	-5.63438	-9.71943	-16.4271	-20.7514	-25.9998	-30.680195161876*
33.6818	0.0827464	-2.25752	-9.62947	-12.5618	-17.6229	-22.7314		35.5518	-0.121292	-5.52639	-9.50587	-16.5896	-19.6961	-25.4481	-31.0567869120434*
33.8816	-0.137447	-2.85222	-9.37363	-12.9312	-17.7853	-23.2322		35.7516	-0.252303	-5.54318	-9.7031	-16.3452	-19.5995	-25.8862	-30.6786902358926*
34.0814	-0.535189	-3.46145	-9.27449	-13.0817	-17.9382	-23.2627		35.9514	-0.310537	-5.39219	-9.85223	-16.5339	-20.2292	-25.851	-30.3380982165912*
34.2813	-0.657879	-3.34662	-9.96256	-13.3712	-18.1051	-23.3899		36.1513	-0.181968	-5.3919	-9.8045	-16.517	-19.3217	-25.8435	-30.4343302389523*
34.4811	-0.463066	-3.95241	-9.14842	-13.1666	-18.1488	-23.8224		36.3511	-0.14175	-5.15037	-9.99363	-16.4275	-19.737	-25.7041	-29.8978633353539*
34.681	-0.641933	-4.20157	-9.9411	-13.4935	-18.2917	-23.5745		36.551	-0.192852	-5.33223	-9.99075	-16.4783	-19.4011	-25.5628	-29.8052829589196*
34.8808	-0.637712	-4.56123	-9.86559	-13.4704	-18.1469	-24.2352		36.7508	-0.422613	-5.74478	-9.83304	-16.3651	-20.0585	-25.5175	-30.6821749685385*
35.0806	-0.857256	-4.37448	-9.88219	-13.5378	-18.3295	-24.0727		36.9506	-0.628754	-6.02489	-9.80987	-16.5293	-20.0351	-25.8037	-30.5746254115261*
35.2805	-0.777875	-4.74419	-10.4306	-13.5654	-18.4144	-24.1951		37.1505	-0.519381	-5.78744	-9.96307	-16.5046	-20.634	-25.433	-30.8380529594108*
35.4803	-0.637003	-5.50661	-10.1098	-13.5886	-18.5294	-24.7706		37.3503	-0.273832	-5.68154	-9.84721	-16.5516	-19.8692	-26.1256	-30.3838243589137*
35.6802	-0.797126	-5.41819	-10.9447	-13.8004	-18.6199	-24.336		37.5502	-0.0890104	-5.60758	-9.928	-16.5448	-18.7396	-25.3934	-30.5450929732799*
35.88	-0.832746	-4.9071	-10.2896	-13.9132	-18.5525	-24.3761		37.75	-0.0952191	-5.5592	-10.0407	-16.6706	-19.6519	-26.2555	-30.3575933420934*
36.0798	-0.930131	-4.93247	-10.7012	-13.9601	-18.6608	-24.5239		37.9498	-0.322846	-5.57172	-10.0522	-16.5333	-19.5034	-25.5681	-30.0115726633571*
36.2797	-0.815107	-5.42958	-10.3943	-14.1361	-18.6692	-24.4515		38.1497	-0.525511	-5.5134	-9.85452	-16.6087	-20.2819	-25.6368	-30.9172711533045*
36.4795	-0.701872	-5.06806	-10.5024	-14.0935	-18.7708	-24.601		38.3495	-0.416984	-5.38981	-9.97001	-16.422	-20.569	-25.5459	-30.5451345935693*
36.6794	-0.767285	-5.62942	-10.4879	-14.1567	-18.8347	-24.6743		38.5494	-0.526704	-5.59701	-10.1192	-16.4448	-20.2226	-26.2123	-30.1931536255681*
36.8792	-0.930483	-4.96815	-10.3685	-14.3605	-18.8939	-25.3339		38.7492	-0.524585	-5.37471	-10.0665	-16.4877	-19.9443	-25.6964	-30.9392687271361*
37.079	-0.722535	-5.00048	-10.3949	-14.4051	-18.7854	-24.5937		38.949	-0.204555	-5.06389	-10.1516	-16.5042	-19.3005	-25.5246	-30.2467021079653*
37.2789	-0.634423	-5.50224	-10.4488	-14.2333	-19.0107	-24.8803		39.1489	-0.438199	-5.34881	-9.91293	-16.5876	-20.1858	-25.6756	-30.480436422278*
37.4787	-0.759879	-5.74066	-10.2508	-14.2483	-19.0684	-24.9334		39.3487	-0.478871	-5.30661	-9.9215	-16.4903	-20.3984	-25.7749	-30.6610243562245*
37.6786	-0.613186	-5.66574	-10.1629	-14.2768	-19.0356	-24.9201		39.5486	-0.609229	-5.4946	-9.91985	-16.464	-20.4892	-26.1877	-30.1455112214402*
37.8784	-0.713753	-5.75146	-9.63989	-14.2722	-18.9952	-24.6671		39.7484	-0.49775	-5.59364	-9.96679	-16.704	-19.9926	-26.087	-30.9287474363821*
38.0782	-0.561792	-5.26371	-10.5675	-14.3532	-18.8584	-24.8272		39.9482	-0.528875	-5.66058	-9.79522	-16.549	-19.2455	-25.5123	-30.9709988531227*
38.2781	-0.717944	-5.26464	-9.75005	-14.4181	-19.0502	-24.9554		40.1481	-0.612066	-5.92786	-9.76817	-16.6759	-20.61	-25.5528	-31.2402402778269*
38.4779	-0.759137	-5.53581	-9.98009	-14.44	-19.2314	-25.5039		40.3479	-0.385906	-5.80758	-10.1015	-16.8508	-20.5577	-25.7912	-30.9773471981394*
38.6778	-0.622473	-5.48428	-9.92969	-14.2841	-19.2347	-25.4027		40.5478	-0.319203	-5.43249	-10.1962	-16.6644	-19.977	-26.2696	-30.2373921268361*
38.8776	-0.69998	-5.34788	-9.5973	-14.3117	-19.0923	-25.1081		40.7476	-0.388402	-5.45834	-10.4171	-16.6713	-20.0472	-26.0799	-30.7393523762783*
39.0774	-0.719278	-5.5764	-9.97884	-14.4572	-19.2285	-25.2783		40.9474	-0.381527	-5.46288	-10.0068	-16.7213	-19.7302	-25.6887	-30.6715345027481*
39.2773	-0.584065	-5.34366	-10.6446	-14.4844	-19.2567	-25.0635		41.1473	-0.540032	-5.83182	-10.0941	-16.733	-20.1679	-26.1479	-30.7358867480275*
39.4771	-0.794118	-5.6369	-9.98201	-14.3612	-19.275	-25.0523		41.3471	-0.666218	-5.6769	-9.97606	-16.7201	-20.6169	-25.8271	-31.1020925302396*
39.677	-0.69377	-5.34047	-10.4744	-14.5391	-19.1401	-25.0259		41.547	-0.609229	-5.68928	-10.0279	-16.9221	-19.0787	-25.5079	-30.9260439370372*
39.8768	-0.815338	-5.13677	-10.2403	-14.6252	-19.1977	-25.4764		41.7468	-0.462101	-5.45475	-10.1406	-16.5755	-19.0231	-25.8455	-30.9849516571363*
40.0766	-1.2538	-4.77991	-10.8851	-14.6104	-19.1174	-25.0358		41.9466	-0.207505	-5.48849	-10.0161	-16.7411	-19.8371	-25.571	-30.7769655188001*
40.2765	-0.912548	-5.12391	-10.6279	-14.7852	-19.1991	-24.9283		42.1465	-0.442132	-5.80432	-10.2407	-16.7928	-18.9932	-25.9232	-31.5572859026911*
40.4763	-0.555511	-5.25012	-10.4121	-14.7488	-19.2563	-25.3226		42.3463	-0.52878	-5.45705	-10.2826	-16.6042	-19.8179	-25.8624	-30.5177138732853*
40.6762	-0.826481	-5.6341	-10.0822	-14.6738	-19.375	-25.0054		42.5462	0.173796	-5.14816	-10.0771	-16.1163	-17.6349	-24.9344	-28.6676071767826*
40.876	-1.04579	-5.23877	-10.9673	-14.7292	-19.236	-24.9077		42.746	-0.171599	-5.46357	-9.80672	-16.2956	-18.3072	-25.3585	-28.3079005278488*
41.0758	-0.820768	-4.10672	-10.9176	-14.526	-19.1927	-24.9322		42.9458	-0.273649	-5.40817	-9.93602	-16.5407	-18.2574	-25.2593	-28.5363151778495*
41.2757	-0.893244	-3.66296	-10.8913	-14.619	-19.2591	-25.712		43.1457	0.844723	-5.16717	-9.45609	-15.8772	-16.6746	-24.6454	-27.5702552688905*
41.4755	-0.716856	-4.43051	-10.5947	-14.7211	-19.2765	-25.2275		43.3455	2.62475	-4.82651	-9.30473	-14.7703	-16.6484	-21.2935	-27.6120575049122*
41.6754	-0.977874	-4.71663	-10.891	-14.633	-19.3274	-25.221		43.5454	2.30241	-5.14809	-9.20879	-14.9168	-17.8725	-21.9634	-27.9009343814496*
41.8752	-0.693595	-4.87029	-10.5535	-14.6306	-19.4293	-25.3027		43.7452	1.90067	-5.34125	-8.76264	-15.1618	-18.3579	-21.8715	-27.8494075534376*
42.075	-0.816683	-5.45225	-10.0825	-14.7404	-19.6266	-25.2638		43.945	1.58528	-5.2367	-8.69853	-15.2644	-18.2531	-22.7734	-28.6434947009229*
42.2749	-0.555017	-5.78712	-10.2182	-14.5912	-19.8125	-25.192		44.1449	1.69876	-5.34123	-8.56432	-15.4237	-17.9217	-22.8903	-28.2283627902031*
42.4747	-0.816275	-5.02473	-10.2953	-14.6795	-19.6271	-25.5863		44.3447	1.40004	-5.10143	-8.75359	-15.4782	-18.8514	-23.4264	-28.9160457346509*
42.6746	-0.748621	-5.17969	-10.4072	-14.5871	-19.5303	-25.1022		44.5446	1.24683	-5.07904	-8.7221	-15.4628	-19.4845	-23.7157	-28.8239327563409*
42.8744	-0.766771	-5.33195	-10.2034	-14.7394	-19.5584	-25.2796		44.7444	1.21284	-5.24012	-8.82339	-15.6505	-18.9365	-23.4495	-29.6468386564541*
43.0742	-0.595928	-5.31211	-10.1207	-14.5361	-19.6269	-25.4381		44.9442	0.912542	-5.40986	-8.84252	-15.5803	-19.6602	-23.8585	-29.3730349202451*
43.2741	-0.544646	-5.74835	-9.6833	-14.6062	-19.7781	-25.2875		45.1441	1.08062	-5.15071	-8.82891	-15.7293	-19.1043	-24.4432	-29.0907192662702*
43.4739	-0.595842	-5.50007	-10.1958	-14.6916	-19.6864	-25.2166		45.3439	0.684744	-5.17951	-8.84913	-15.5368	-20.4474	-24.2369	-29.851810394158*
43.6738	-0.76024	-5.29855	-10.2677	-14.6484	-19.733	-25.4177		45.5438	0.659685	-5.47865	-8.87522	-15.6931	-20.024	-24.4145	-29.5727470360216*
43.8736	-0.589974	-5.59414	-10.4218	-14.4595	-19.7602	-25.2375		45.7436	0.77163	-4.98254	-9.24942	-15.7345	-18.9783	-25.0042	-28.8405720022037*
44.0734	-0.470212	-2.91869	-10.5916	-13.3969	-19.322	-23.3849		45.9434	0.857268	-5.29241	-8.98108	-15.8903	-20.1094	-25.0786	-29.2373461812316*
44.2733	-0.432483	-3.81259	-10.221	-13.4349	-19.3604	-23.2909		46.1433	0.553795	-5.22667	-8.98266	-15.8007	-20.2151	-25.0083	-29.7750456594662*
44.4731	-0.361089	-2.29248	-10.3732	-13.267	-19.3109	-23.61		46.3431	0.71374	-5.22946	-9.13481	-16.0084	-19.5595	-25.319	-30.0061282518935*
44.673	-0.283439	-3.56288	-10.0305	-13.3981	-19.4877	-23.5756		46.543	0.591352	-5.0607	-9.05705	-15.9047	-20.0868	-24.9685	-29.8797729059906*
44.8728	-0.301765	-3.79083	-9.94994	-13.6557	-19.6231	-23.9502		46.7428	0.533747	-5.28179	-9.11217	-16.0003	-19.5767	-25.3563	-29.8820815356827*
45.0726	-0.563644	-4.18498	-9.82738	-13.5363	-19.6331	-24.3165		46.9426	0.604454	-5.24802	-9.23075	-15.8731	-19.4446	-25.7263	-30.2083842861829*
45.2725	-0.677948	-4.81017	-10.3397	-13.7685	-19.7595	-24.2367		47.1425	0.527171	-5.19373	-9.25704	-16.0692	-19.118	-25.7245	-30.6041455683754*
45.4723	-0.627826	-4.96976	-10.3553	-13.9159	-19.6675	-24.1847		47.3423	0.419692	-5.22416	-9.31831	-16.0872	-19.0647	-25.696	-30.5481007783473*
45.6722	-0.61341	-4.89598	-9.92546	-13.9668	-19.5561	-24.3057		47.5422	0.444595	-5.26727	-9.38776	-16.046	-19.545	-25.5613	-30.3670240902919*
45.872	-0.635969	-5.21475	-10.276	-13.9082	-19.7888	-24.8204		47.742	0.32686	-5.25321	-9.36149	-15.9564	-19.8536	-25.5428	-30.703692658159*
46.0718	-0.63698	-5.48213	-9.93629	-13.91	-19.796	-24.7642		47.9418	0.367729	-5.29112	-9.24899	-16.1505	-19.775	-25.5366	-29.7313505872665*
46.2717	-0.543776	-5.24362	-9.97277	-13.8847	-19.6538	-24.5569		48.1417	0.314274	-5.15463	-9.3352	-16.0745	-19.5926	-25.7758	-29.6645350121811*
46.4715	-0.567345	-5.06888	-9.95476	-13.9849	-19.7382	-24.5715		48.3415	1.01232	-5.19243	-8.34822	-15.3511	-18.4826	-23.863	-28.1221696452452*
46.6714	-0.679235	-5.48862	-9.89009	-13.8661	-19.7749	-25.0294		48.5414	1.27183	-5.21006	-8.262	-15.2325	-18.5282	-23.2546	-28.3869219919592*
46.8712	-0.512903	-5.81147	-10.0459	-14.046	-19.7258	-24.6393		48.7412	1.40664	-5.0499	-8.34146	-15.4985	-19.1315	-23.7964	-28.5929854093851*
47.071	-0.609569	-6.11458	-10.0477	-14.1712	-19.6884	-24.5703		48.941	0.955307	-5.28692	-8.35065	-15.282	-18.9924	-24.2375	-29.2305682147576*
47.2709	-0.695214	-4.62695	-10.2937	-13.9795	-19.7054	-24.721		49.1409	0.937676	-5.35642	-8.52252	-15.4663	-19.5938	-24.6612	-29.3708683908634*
47.4707	0.000116551	-0.733749	-8.70485	-12.1692	-17.6392	-20.7042		49.3407	0.805046	-5.22957	-8.57712	-15.6637	-20.0852	-24.9761	-29.5382626930697*
47.6706	-0.355614	-1.59067	-8.89261	-11.8779	-17.8151	-21.2886		49.5406	0.579976	-5.30647	-8.38408	-15.4805	-20.4477	-24.7948	-29.2413187582533*
47.8704	-0.346182	-2.57031	-9.06918	-12.1242	-18.1247	-21.7499		49.7404	0.485063	-5.7009	-8.43542	-15.5991	-20.1369	-24.6635	-29.9656725209329*
48.0702	-0.849817	-3.32142	-9.39863	-12.3894	-18.2881	-22.0271		49.9402	0.684488	-5.6498	-8.34841	-15.7951	-20.8766	-24.8619	-29.6153373283426*
48.2701	-0.362046	-3.7458	-9.08295	-12.5393	-18.552	-22.8429		50.1401	0.626633	-5.3104	-8.52976	-15.675	-20.5346	-25.3523	-29.5550509077279*
48.4699	-0.583501	-4.2843	-8.72354	-12.5201	-18.6678	-23.4047		50.3399	0.888562	-4.92726	-8.81655	-15.6279	-19.9015	-24.9967	-29.5205429117154*
48.6698	-0.832399	-4.33191	-8.57341	-12.8289	-18.7496	-23.8965		50.5398	0.776359	-4.90439	-8.95243	-15.6988	-19.7945	-24.9804	-29.6564982025277*
48.8696	-1.08241	-4.5607	-9.33561	-13.1077	-18.6009	-23.4036		50.7396	0.742998	-5.14981	-8.89232	-15.8641	-20.2121	-25.7268	-29.913497576316*
49.0694	-0.765477	-4.83645	-8.71528	-13.2367	-18.7522	-24.0196		50.9394	0.571892	-5.15584	-8.85599	-15.7185	-19.7672	-25.1248	-30.5348682555169*
49.2693	-0.624952	-5.3282	-9.29115	-13.1523	-18.7716	-24.0757		51.1393	0.369909	-5.17732	-8.8522	-15.7965	-20.1872	-25.651	-30.2174781374705*
49.4691	-0.880358	-5.51032	-9.11072	-13.3283	-18.8449	-24.2051		51.3391	0.576364	-5.09016	-8.82855	-15.7219	-19.49	-25.2715	-29.9372062671385*
49.669	-1.15599	-5.42876	-9.94509	-13.7044	-18.8603	-24.2826		51.539	0.761107	-5.24916	-8.75169	-15.7566	-19.3729	-25.3814	-30.4785616897888*
49.8688	-1.03349	-4.08966	-9.84286	-13.4241	-18.6975	-24.2352		51.7388	0.644231	-4.92108	-9.26221	-15.6036	-19.1196	-25.2832	-29.3522345551752*
50.0686	-0.858561	-4.21883	-9.84386	-13.5327	-18.9273	-24.284		51.9386	0.662226	-4.97028	-9.38154	-15.7552	-18.5812	-25.8217	-29.5223362230921*
50.2685	-1.08948	-3.97009	-10.0841	-13.9829	-18.9031	-24.4702		52.1385	0.535063	-5.04465	-9.49869	-15.8232	-19.2388	-25.621	-30.3125517739299*
50.4683	-1.05582	-3.88942	-10.2872	-13.9762	-18.9088	-24.7254		52.3383	0.803362	-5.0412	-8.88884	-15.7325	-17.3167	-25.7334	-30.0488799172208*
50.6682	-1.03243	-5.03002	-10.2054	-14.136	-19.1861	-25.0426		52.5382	0.534088	-5.22729	-8.94892	-15.4403	-18.4416	-25.0891	-29.8366027952773*
50.868	-0.99792	-5.19062	-9.71306	-14.1561	-19.1556	-24.9842		52.738	0.14301	-5.24072	-9.19205	-15.4578	-18.6609	-25.0824	-29.7138750692499*
51.0678	-1.23866	-4.27119	-10.0965	-14.539	-19.1911	-24.5021		52.9378	0.509213	-5.336	-8.58775	-15.6601	-19.1324	-25.4824	-28.5918345970115*
51.2677	-0.944794	-4.93961	-9.25356	-14.3035	-19.0456	-25.7021		53.1377	0.276847	-5.26798	-8.82529	-15.6514	-19.012	-25.4491	-26.0724274779798*
51.4675	-0.37837	-5.61253	-9.22812	-14.2087	-19.4694	-24.9456		53.3375	0.488422	-5.15984	-8.78053	-15.8579	-19.5095	-25.2892	-27.5483216038093*
51.6674	-0.639939	-5.61317	-9.332	-14.3944	-19.4184	-25.1957		53.5374	0.434596	-5.17419	-8.8331	-15.833	-19.4629	-25.8968	-27.1199146402367*
51.8672	-0.736915	-5.71601	-8.99696	-14.2861	-19.2295	-25.4381		53.7372	0.512228	-5.22132	-8.92186	-15.9243	-19.3876	-25.5628	-27.3212954339549*
52.067	-0.760876	-4.97334	-9.21433	-14.5364	-19.3163	-24.9602		53.937	0.319857	-5.25144	-8.84589	-15.7905	-19.2999	-25.8219	-27.0725448376328*
52.2669	-0.66416	-5.67927	-9.82557	-14.3291	-19.3755	-25.2352		54.1369	0.306847	-5.2573	-9.2055	-15.8206	-19.3821	-25.9067	-27.3367154100282*
52.4667	-0.675242	-5.01908	-9.70085	-14.4754	-19.4531	-25.4318		54.3367	0.329027	-5.11824	-9.24796	-15.857	-19.2434	-25.6638	-27.5838057434399*
52.6666	-0.608724	-5.36879	-10.3832	-14.4933	-19.6425	-24.5888		54.5366	0.157387	-5.37548	-9.26359	-16.0815	-19.135	-25.4081	-27.8918823096547*
52.8664	-0.796878	-4.79377	-9.92903	-14.405	-19.4905	-25.4688		54.7364	0.138784	-5.32783	-9.39456	-15.9231	-19.4205	-25.2135	-28.5095908582549*
53.0662	-0.850315	-5.39481	-10.0553	-14.5646	-19.4303	-24.9439		54.9362	0.0337919	-5.33198	-9.36354	-15.9302	-19.4139	-25.6619	-28.7604135991494*
53.2661	-0.94999	-5.95593	-9.79142	-14.5324	-19.4531	-25.6333		55.1361	-0.00726142	-5.6536	-9.49133	-15.9446	-19.3713	-25.8005	-28.8803728254017*
53.4659	-0.734731	-1.9171	-9.46853	-13.7897	-18.5037	-24.1303		55.3359	-0.102092	-5.79081	-9.60274	-16.1067	-18.592	-25.7039	-29.3688123940537*
53.6658	-0.468987	-0.00950794	-7.57783	-12.3252	-16.4734	-20.2124		55.5358	-0.342204	-5.43672	-9.41954	-15.9633	-19.8468	-25.6374	-29.044740673012*
53.8656	-0.447758	-1.84363	-8.85382	-12.2333	-16.3403	-20.6308		55.7356	-0.0522947	-5.41635	-9.67401	-16.1139	-19.0326	-25.6159	-29.1075804870098*
54.0654	-0.552607	-2.51878	-8.26237	-12.3331	-16.7935	-21.5127		55.9354	-0.025356	-5.56785	-9.41578	-16.276	-20.0505	-25.5263	-29.3594357749748*
54.2653	-0.652038	-3.09434	-7.96728	-12.4262	-16.9887	-21.5383		56.1353	-0.0623262	-5.31377	-9.5349	-16.1558	-19.0517	-25.691	-29.0217530821325*
54.4651	-0.463966	-3.75401	-7.4322	-12.5366	-17.1984	-22.9854		56.3351	-0.143466	-5.3698	-9.47343	-16.1456	-19.0115	-25.4514	-29.278026716339*
54.665	-1.17836	-3.534	-9.34764	-13.1876	-17.3639	-22.6146		56.535	0.147291	-5.3043	-9.72648	-16.0667	-19.1364	-25.747	-29.2937732865958*
54.8648	-1.05448	-4.41319	-8.64496	-13.0772	-17.3664	-23.3874		56.7348	-0.0908938	-5.3259	-9.78279	-16.0243	-19.2634	-26.0163	-29.7353258934875*
55.0646	-1.14854	-3.72823	-9.07109	-13.3746	-17.289	-23.1008		56.9346	-0.282893	-5.28852	-9.60866	-15.9966	-19.659	-25.7507	-29.7166665852724*
55.2645	-1.44332	-5.0994	-9.31834	-13.7318	-17.2612	-22.6128		57.1345	-0.346148	-5.34873	-9.68603	-15.9335	-20.1457	-25.528	-29.8478155059319*
55.4643	-1.10468	-4.91383	-8.78257	-13.4315	-17.473	-23.8314		57.3343	-0.28206	-5.43515	-9.41063	-16.0515	-19.597	-25.6969	-30.1038411241516*
55.6642	-0.990136	-4.57609	-8.84274	-13.3646	-17.5173	-23.8009		57.5342	0.631751	-5.3244	-8.91275	-15.3987	-18.6248	-24.3078	-27.7596464626286*
55.864	-1.60821	-4.34049	-9.87106	-13.7862	-17.364	-24.1768		57.734	0.620544	-5.32314	-9.01042	-15.7271	-18.8347	-24.4151	-28.784153539304*
56.0638	-1.11703	-5.26632	-9.25609	-13.5611	-17.6876	-24.2949		57.9338	0.631982	-5.25666	-9.43936	-15.7756	-18.8473	-24.9145	-28.7679125291065*
56.2637	-0.818765	-5.08371	-9.41269	-13.7941	-17.633	-24.2799		58.1337	0.627365	-5.32251	-9.21399	-15.8628	-18.9434	-24.9549	-29.1386037503764*
56.4635	-0.657207	-5.75628	-8.46293	-13.6337	-17.894	-24.8505		58.3335	0.566797	-5.31963	-9.23432	-15.8442	-18.9789	-25.3845	-29.0454327524691*
56.6634	-0.583535	-6.04189	-8.72625	-13.9298	-17.8626	-24.9234		58.5334	-0.0819238	-5.25039	-9.0715	-15.6855	-20.5125	-25.0808	-29.2007915131736*
56.8632	-0.853806	-5.15611	-9.03532	-14.2141	-17.8754	-24.3677		58.7332	0.436504	-5.24575	-9.24258	-15.8513	-18.6916	-25.2817	-28.771974942272*
57.063	-0.885256	-5.75134	-8.33401	-14.0977	-17.8852	-25.0284		58.933	0.405604	-5.37274	-9.08124	-15.8217	-19.6349	-25.1212	-28.4440113830214*
57.2629	-1.13472	-4.899	-9.02291	-14.2592	-17.7803	-24.886		59.1329	0.505618	-5.23468	-9.34659	-15.9337	-19.1075	-25.3302	-28.4016089505859*
57.4627	-1.0229	-4.75411	-9.24264	-14.3011	-17.7848	-24.659		59.3327	0.392109	-5.12453	-9.57119	-15.9355	-18.6529	-25.5891	-28.3548741416869*
57.6626	-0.885026	-4.7811	-9.22025	-14.2376	-17.9349	-24.9993		59.5326	0.18003	-5.49076	-9.28655	-15.8389	-18.6112	-24.9661	-28.9068860869168*
57.8624	-0.88342	-5.12418	-9.21529	-14.2551	-17.9491	-24.7334		59.7324	0.111919	-5.08475	-9.27421	-15.8025	-19.6492	-25.8293	-28.282788027877*
58.0622	-1.13562	-4.7029	-9.22234	-14.2959	-18.0436	-25.2153		59.9322	0.262911	-5.24062	-9.19718	-15.5924	-17.7691	-25.5379	-27.2176131523577*
58.2621	-0.925874	-5.01936	-9.62514	-14.1705	-18.0163	-25.0372		60.1321	0.605708	-5.32503	-9.25599	-15.7313	-18.6495	-24.8231	-26.7551548787896*
58.4619	-0.908463	-5.15777	-8.67352	-14.3043	-18.0445	-24.7994		60.3319	0.197174	-5.50289	-9.26869	-15.6337	-19.5613	-25.2856	-27.701052145583*
58.6618	-0.904121	-5.13148	-8.765	-14.3787	-18.122	-25.0934		60.5318	0.0862583	-5.6782	-9.24447	-15.7621	-20.3501	-25.4106	-27.9989831408147*
58.8616	-0.756159	-5.57922	-9.19372	-14.3854	-18.4408	-25.2601		60.7316	0.131084	-5.57716	-9.17094	-15.781	-20.0762	-25.375	-28.3922659916317*
59.0614	-0.856728	-5.38968	-9.59224	-14.4273	-18.3276	-25.1796		60.9314	0.0823579	-5.48864	-9.24101	-15.8012	-20.3154	-25.1865	-28.376817586399*
59.2613	-0.814318	-5.37287	-9.29583	-14.5178	-18.311	-24.8444		61.1313	0.26376	-5.37423	-9.75904	-15.7527	-19.8394	-25.685	-28.303263163363*
59.4611	-0.834194	-4.64275	-9.20419	-14.3894	-18.4259	-25.0974		61.3311	0.182259	-5.42407	-9.67097	-15.7474	-19.3256	-25.0737	-28.7564969707135*
59.661	-0.78623	-5.22593	-9.63885	-14.5269	-18.3913	-25.1376		61.531	0.2828	-5.34193	-9.52956	-15.7526	-20.1247	-25.3252	-29.5483871127582*
59.8608	-0.897684	-4.87592	-9.50395	-14.6533	-18.3971	-25.4384		61.7308	0.170863	-5.05036	-9.42077	-15.885	-20.1854	-25.4	-29.463522660369*
60.0606	-1.03262	-5.21932	-9.43353	-14.7948	-18.4887	-25.082		61.9306	0.143852	-5.12447	-9.32454	-15.771	-20.1935	-25.5382	-29.5337372257555*
60.2605	-0.710698	-4.07687	-9.79834	-14.6721	-18.3664	-24.7792		62.1305	0.255107	-5.20147	-9.30731	-15.8069	-19.1191	-24.8864	-28.154710798292*
60.4603	-0.650178	-2.02349	-9.97764	-14.0591	-17.8779	-23.4458		62.3303	0.395145	-5.13489	-9.15042	-15.8512	-18.9373	-25.3033	-28.1354713077913*
60.6602	-0.500145	-0.868205	-8.05827	-12.4447	-16.1485	-20.9997		62.5302	0.345572	-5.32758	-9.20842	-15.7602	-19.6475	-25.5189	-29.0954776252585*
60.86	-0.47304	-0.10319	-7.50712	-11.5549	-15.1871	-19.9703		62.73	0.258071	-5.15302	-9.30377	-15.8863	-19.5438	-25.5675	-28.7321236288868*
61.0598	-0.438851	-1.54968	-7.22576	-11.4092	-15.5029	-20.4608		62.9298	0.298593	-5.32833	-9.24603	-15.8309	-19.2144	-25.4474	-28.8297159296682*
61.2597	-0.610972	-2.62545	-7.56308	-11.6889	-15.8262	-21.5144		63.1297	0.398992	-5.21578	-9.19641	-15.8378	-19.8588	-25.4952	-29.1889210882298*
61.4595	-0.534136	-3.52224	-8.01817	-11.8157	-16.2888	-21.5029		63.3295	0.28044	-5.03482	-9.45396	-15.5991	-19.0744	-24.2111	-29.4554587861558*
61.6594	-0.0548873	-4.98446	-6.6163	-12.1591	-16.5478	-21.2158		63.5294	0.221816	-5.12856	-9.64421	-15.7991	-19.7074	-25.6197	-29.5781810992712*
61.8592	-0.250033	-5.10708	-7.86582	-11.9858	-16.9127	-22.6888		63.7292	0.136137	-5.3515	-9.54576	-15.4907	-20.3249	-25.6649	-29.6511892275796*
62.059	-0.264849	-4.69232	-7.25459	-12.3407	-16.6485	-23.3219		63.929	-0.124027	-5.41357	-9.53837	-15.4173	-21.4738	-25.2656	-29.972599569919*
62.2589	-0.793514	-4.44111	-7.9011	-12.6096	-16.6229	-23.357		64.1289	0.0509355	-5.2476	-9.42334	-15.7308	-20.0163	-25.3662	-30.0792961611753*
62.4587	-0.64443	-5.93582	-8.43927	-12.4136	-16.74	-23.4604		64.3287	-0.0456664	-5.29461	-9.5275	-15.8405	-20.3577	-25.6706	-29.321451916214*
62.6586	-0.880874	-4.43603	-8.56746	-12.8612	-16.8144	-23.4353		64.5286	-0.0321219	-5.24733	-9.36183	-15.8642	-20.1447	-25.1264	-28.8843456298567*
62.8584	-0.706063	-5.09288	-8.80334	-12.9757	-16.8596	-24.0267		64.7284	0.164251	-5.29513	-9.50331	-15.9676	-19.4489	-25.58	-29.4483289804047*
63.0582	-0.599283	-5.19633	-8.44077	-13.0707	-16.8537	-24.531		64.9282	0.0520204	-5.52687	-9.51197	-16.1262	-20.0205	-25.5136	-29.1335608723606*
63.2581	-0.844562	-5.626	-8.77088	-13.3119	-17.0645	-24.0465		65.1281	-0.0463115	-5.55647	-9.47846	-15.8601	-19.6033	-25.1713	-30.0803090580107*
63.4579	-0.514866	-6.30381	-8.71061	-13.0155	-17.3731	-24.7213		65.3279	-0.117083	-5.7409	-9.48009	-15.9057	-19.9639	-25.3015	-30.0319576988767*
63.6578	-0.610949	-5.88508	-8.67436	-13.2174	-17.3677	-24.725		65.5278	-0.0181402	-5.5117	-9.60462	-15.8871	-19.5092	-25.2128	-29.9889940589138*
63.8576	-0.586061	-5.90798	-8.92622	-13.2132	-17.6094	-24.6563		65.7276	0.0580666	-5.50174	-9.58954	-15.9706	-20.3004	-25.5568	-29.6029604094944*
64.0574	-0.584874	-5.7146	-8.53897	-13.5786	-17.5321	-25.2932		65.9274	-0.175976	-5.48688	-9.86631	-15.839	-19.6836	-25.5706	-29.6912152097203*
64.2573	-0.514466	-6.60517	-8.22818	-13.7495	-17.5045	-24.6668		66.1273	0.0302526	-5.59874	-9.69593	-16.0453	-19.2725	-25.139	-29.8276933241461*
64.4571	-0.50742	-5.72284	-8.81965	-13.5897	-17.6651	-25.0991		66.3271	0.151765	-5.55475	-9.7495	-16.0597	-19.7403	-25.2867	-30.1847115525612*
64.657	-0.480859	-3.34818	-9.03709	-13.2321	-17.1392	-24.212		66.527	0.0740676	-5.53977	-9.73278	-16.1228	-19.4769	-25.8333	-29.798296572592*
64.8568	-0.215262	-2.70985	-9.19918	-13.1265	-16.7252	-24.0029		66.7268	0.141713	-5.36526	-9.80958	-16.0905	-19.3716	-25.6212	-30.2084549951882*
65.0566	-0.508182	-4.32241	-9.2977	-13.3676	-16.8781	-23.9668		66.9266	-0.0690321	-5.51472	-9.72072	-15.9965	-19.393	-25.4821	-30.5476600126595*
65.2565	-0.4294	-2.72894	-9.16102	-12.9532	-16.7298	-23.4114		67.1265	-0.200475	-5.32346	-9.85125	-15.9382	-19.9068	-25.3253	-31.0522089076425*
65.4563	-0.216356	-0.981059	-8.40312	-11.4318	-15.1245	-20.7239		67.3263	-0.302924	-5.47153	-9.85262	-15.9854	-19.9547	-25.1138	-31.0483707436866*
65.6562	-0.367619	-1.85767	-8.02689	-11.3366	-15.4468	-20.2117		67.5262	-0.137791	-5.25518	-9.60191	-15.8102	-18.559	-25.4758	-29.815913917999*
65.856	-0.271815	-3.07367	-7.78554	-11.5234	-15.7277	-21.4138		67.726	-0.00738031	-5.25518	-9.51278	-15.9982	-18.7145	-25.3033	-28.8401733116719*
66.0558	-0.639327	-3.19136	-7.85831	-11.6663	-15.8257	-22.7016		67.9258	-0.120183	-5.49012	-9.73462	-15.7683	-20.62	-25.9234	-29.3897060067664*
66.2557	-0.527987	-3.70912	-7.64076	-11.6751	-15.9324	-23.5983		68.1257	0.00504635	-5.18959	-9.69385	-15.9639	-19.2779	-25.1197	-29.0740108806917*
66.4555	-0.126736	-4.83709	-7.13227	-11.7519	-16.3465	-22.3633		68.3255	1.29463	-5.49972	-9.65957	-14.4268	-19.1436	-22.1361	-28.966271189461*
66.6554	-0.261547	-4.99181	-7.81219	-11.97	-16.3935	-22.7625		68.5254	1.15787	-5.92888	-9.42084	-14.453	-20.0692	-22.4421	-29.6293281137132*
66.8552	-0.438751	-5.10723	-7.92692	-12.0312	-16.535	-23.5575		68.7252	0.971349	-5.74089	-9.52417	-14.5512	-20.1193	-22.7599	-29.5886932926942*
67.055	-0.350121	-5.51309	-8.34712	-12.3869	-16.6163	-23.461		68.925	0.951439	-5.71919	-9.49434	-14.451	-20.7652	-23.5347	-29.4819033628217*
67.2549	-0.545718	-5.5389	-8.18967	-12.4974	-16.7665	-24.136		69.1249	1.37068	-5.05096	-9.45028	-15.2527	-20.0091	-23.1016	-30.6858407380717*
67.4547	-0.581194	-5.81355	-8.36256	-12.6575	-16.7522	-24.2443		69.3247	1.15116	-5.51112	-9.5487	-15.0086	-20.1431	-23.8203	-29.5785015527562*
67.6546	-0.388038	-5.28023	-8.36832	-12.6342	-16.7349	-23.8433		69.5246	1.25003	-5.26769	-9.64136	-15.4078	-18.9261	-24.3771	-30.3097818640686*
67.8544	0.304076	0.171594	-7.28252	-11.4429	-14.7331	-21.7336		69.7244	1.21573	-5.19045	-9.78443	-15.2365	-19.8895	-24.3893	-29.6046516033304*
68.0542	0.256486	0.0726472	-6.2475	-10.2574	-14.0727	-19.6753		69.9242	1.1368	-5.2009	-9.75624	-15.1879	-19.3016	-24.6038	-29.7523510936187*
68.2541	0.296632	-2.12017	-6.15283	-10.1816	-14.7349	-20.4061		70.1241	0.988401	-5.32998	-9.52932	-15.3238	-19.3255	-24.5136	-30.1624951879186*
68.4539	-0.111702	-2.80132	-6.84014	-10.8506	-14.8154	-20.8932		70.3239	0.622319	-5.67011	-9.57535	-15.2386	-20.0286	-24.4936	-30.4211429753438*
68.6538	-0.00851187	-3.84781	-6.59957	-10.8805	-15.2377	-21.6101		70.5238	0.494466	-5.77956	-9.48294	-15.2889	-20.0225	-24.4826	-30.1726697793876*
68.8536	0.201279	-4.28811	-6.75494	-10.939	-15.6733	-21.9628		70.7236	0.168758	-5.79769	-9.55863	-14.9872	-20.2597	-24.2051	-30.706016343934*
69.0534	0.0460063	-4.2364	-6.84318	-11.2739	-15.4909	-22.7135		70.9234	0.609508	-5.44057	-9.47929	-15.5037	-19.9283	-24.7675	-30.3604405792684*
69.2533	-0.147721	-4.61491	-7.27032	-11.5024	-16.0275	-22.6242		71.1233	0.627385	-5.3868	-9.61187	-15.5792	-20.3127	-24.9158	-30.1522652619337*
69.4531	0.436202	-7.17141	-5.72509	-10.8057	-17.5272	-24.1013		71.3231	0.476795	-5.58328	-9.52789	-15.5792	-19.5961	-25.3498	-30.4511343739398*
69.653	0.327104	-6.22603	-5.95721	-11.2231	-18.2778	-24.5154		71.523	0.864285	-5.15212	-9.68626	-15.713	-19.307	-25.2237	-30.5477678160321*
69.8528	0.347277	-6.17479	-6.24396	-11.5156	-18.4389	-23.9675		71.7228	0.458442	-5.49055	-9.66429	-15.5572	-19.7625	-25.0448	-31.0088962872388*
70.0526	1.14249	-5.27143	-6.4862	-11.3869	-18.1186	-21.455		71.9226	0.298628	-5.66772	-9.6593	-15.3574	-20.1147	-24.9636	-30.7367846545988*
70.2525	1.80348	-4.62285	-4.64064	-10.0352	-17.3095	-18.8733		72.1225	0.409097	-5.68018	-9.68914	-15.4304	-20.2138	-25.172	-30.7141554985613*
70.4523	0.758919	-4.44895	-5.11557	-10.7909	-17.1264	-20.0592		72.3223	-0.0647041	-5.71405	-9.65656	-15.3098	-20.1053	-25.1141	-30.3189658471633*
70.6522	0.077611	-4.64273	-5.41039	-11.2245	-17.7451	-20.8603		72.5222	0.208274	-5.72476	-9.78994	-15.5066	-20.245	-25.0351	-30.2757473841355*
70.852	0.939625	-5.34851	-5.12496	-10.5637	-17.3671	-22.8953		72.722	-0.244811	-6.12336	-9.6457	-15.231	-21.4268	-24.96	-30.0680043492274*
71.0518	-0.0228549	-5.54758	-6.68837	-11.5533	-17.2868	-22.3978		72.9218	0.0732214	-5.74315	-9.61041	-15.2888	-20.8442	-24.9675	-30.3767630105785*
71.2517	0.437052	-6.42556	-5.77588	-11.4384	-17.6529	-23.1735		73.1217	0.3166	-5.43643	-9.69354	-15.5466	-19.6028	-25.3874	-30.006882845935*
71.4515	0.634437	-5.7517	-5.39105	-11.4306	-17.9094	-23.6426		73.3215	0.267537	-5.54035	-9.65408	-15.6978	-19.5868	-25.3705	-30.356185075252*
71.6514	0.140718	-6.00293	-6.58239	-11.9461	-17.7052	-23.659		73.5214	-0.0190679	-5.65435	-9.80594	-15.654	-20.0417	-25.11	-30.564032251857*
71.8512	0.113568	-5.60871	-6.61348	-12.2948	-18.5144	-24.1629		73.7212	0.334925	-5.3182	-9.9389	-15.8382	-19.1788	-25.8301	-30.1783370299745*
72.051	0.201953	-5.64248	-6.5796	-12.0863	-18.1368	-24.4829		73.921	0.404772	-5.52531	-9.84588	-15.9609	-19.8	-25.5259	-30.8794762915956*
72.2509	0.370111	-6.41941	-6.38632	-12.1949	-18.3118	-24.6189		74.1209	0.186081	-5.75049	-9.83566	-15.9036	-19.3082	-25.771	-30.6306285812648*
72.4507	-0.0273756	-5.96482	-7.59421	-12.6604	-18.068	-25.0285		74.3207	0.269275	-5.69168	-9.96367	-15.8888	-19.403	-25.618	-30.7315723387928*
72.6506	-0.0451778	-5.50962	-7.41706	-13.0623	-18.4695	-24.7473		74.5206	0.0702029	-5.25841	-9.9598	-15.8002	-20.4134	-25.746	-30.3521367629496*
72.8504	-0.0753679	-6.31929	-7.51426	-12.8644	-18.0168	-24.7853		74.7204	0.131882	-5.1823	-9.97131	-15.6125	-19.4196	-25.4328	-30.0985039702207*
73.0502	-0.0999338	-6.1191	-7.69734	-13.184	-18.4884	-24.5775		74.9202	-0.0244206	-5.2722	-9.95007	-15.7938	-19.6681	-25.4913	-30.7665736375797*
73.2501	-0.317683	-5.39592	-8.02792	-13.1377	-18.3252	-25.3183		75.1201	0.382271	-5.05199	-10.004	-15.7713	-20.0014	-25.7107	-29.9068112199653*
73.4499	0.259832	-5.8998	-6.70013	-12.9395	-18.6636	-25.706		75.3199	0.14691	-5.35834	-10.0771	-15.9223	-19.77	-25.7646	-30.2727912064217*
73.6498	-0.312426	-5.96142	-8.10695	-13.3115	-18.5529	-25.447		75.5198	0.0712059	-5.12686	-9.96602	-15.8486	-19.9564	-25.3449	-30.8542848722773*
73.8496	-1.0619	-5.78155	-9.30212	-13.9163	-18.1728	-24.6632		75.7196	0.22483	-5.23383	-10.278	-15.8136	-20.0121	-25.845	-30.7380064261544*
74.0494	-1.05489	-4.50417	-9.20368	-13.913	-17.8833	-24.6116		75.9194	0.0343584	-5.18833	-10.2924	-15.8149	-19.6863	-24.9541	-31.1242536285963*
74.2493	-0.839857	-5.89892	-8.7854	-13.9346	-18.1418	-24.9241		76.1193	0.058749	-5.07218	-10.0744	-15.9072	-19.6228	-25.4009	-31.6438717975419*
74.4491	0.388496	-5.30395	-7.00433	-13.3879	-18.8184	-25.0914		76.3191	0.124581	-5.19322	-10.0894	-16.0165	-18.9819	-25.4917	-31.1722395479433*
74.649	-0.315349	-5.48552	-9.1732	-13.8126	-18.3438	-24.8742		76.519	-0.0971097	-5.22007	-10.1808	-15.8332	-19.3227	-25.1858	-30.5907260953927*
74.8488	-0.654006	-5.339	-9.41847	-13.8832	-18.3953	-25.523		76.7188	-0.265153	-5.60025	-10.143	-15.9393	-20.1378	-25.4527	-31.0813371969583*
75.0486	-0.599897	-5.40611	-8.68563	-14.1186	-18.4476	-25.3843		76.9186	-0.50363	-5.77944	-10.0514	-15.7517	-20.29	-25.0132	-30.7909180953804*
75.2485	-0.343922	-5.6923	-8.78839	-13.9263	-18.307	-25.6345		77.1185	-0.21284	-5.94814	-10.3546	-15.914	-19.8441	-25.7868	-30.6863142541511*
75.4483	-0.484672	-5.3923	-8.89431	-14.0859	-18.3579	-25.1718		77.3183	-0.17767	-5.60757	-10.224	-15.7702	-20.5014	-25.3193	-31.0084925931749*
75.6482	-0.719698	-5.23021	-9.039	-14.1513	-18.5623	-25.5173		77.5182	-0.234882	-5.58921	-10.2893	-15.9016	-20.5469	-25.8497	-31.0799027752903*
75.848	-0.496798	-5.15999	-9.45065	-14.4091	-18.6992	-25.3792		77.718	-0.184106	-5.45229	-10.256	-16.0393	-20.2858	-25.4661	-30.815474748427*
76.0478	-0.318331	-6.09491	-9.0244	-14.1899	-18.9298	-25.4857		77.9178	-0.34996	-5.73391	-10.1059	-16.1345	-20.0765	-25.1128	-31.4229610810303*
76.2477	-0.301898	-5.89288	-8.9342	-14.3529	-18.899	-25.5284		78.1177	-0.372817	-5.64611	-10.2766	-15.8481	-19.8174	-25.5915	-30.8830529072849*
76.4475	-0.288972	-5.79495	-9.39279	-14.3374	-19.0104	-25.3764		78.3175	-0.654326	-5.90647	-10.1992	-15.683	-20.482	-25.0388	-31.464148110042*
76.6474	-0.036197	-6.56793	-8.66662	-14.2268	-19.0802	-25.4437		78.5174	-0.114333	-5.32473	-10.3028	-16.0448	-19.0465	-26.4506	-30.0757855238793*
76.8472	-0.430986	-5.91324	-9.60544	-14.3446	-19.1792	-25.6425		78.7172	-0.303047	-5.15165	-10.0853	-15.8635	-20.0009	-25.2617	-30.9534817148168*
77.047	-0.52881	-5.10769	-9.59488	-14.6724	-19.1218	-25.4887		78.917	0.132957	-5.20405	-10.3227	-15.9682	-19.2821	-25.6676	-30.8874760296252*
77.2469	-0.645324	-5.15614	-9.68083	-14.6947	-19.1195	-25.4811		79.1169	-0.178004	-5.27737	-10.4389	-16.0092	-18.6276	-25.5069	-30.5245755352046*
77.4467	-0.399379	-5.92045	-9.28641	-14.5608	-19.1353	-25.2519		79.3167	-0.181707	-5.40981	-10.5326	-15.8709	-20.0771	-25.6894	-31.0497392097048*
77.6466	-0.348408	-5.60682	-9.19942	-14.4405	-19.1602	-25.204		79.5166	-0.238081	-5.55944	-10.4833	-15.7794	-20.1345	-25.5884	-30.6767427247552*
77.8464	-0.148692	-5.99475	-8.74832	-14.3567	-19.15	-25.876		79.7164	-0.153576	-5.68667	-10.1576	-15.9791	-20.0932	-25.529	-30.4118229871505*
78.0462	-0.275393	-5.59775	-9.3977	-14.5629	-19.2277	-25.9926		79.9162	-0.252546	-5.62898	-10.3965	-15.8396	-20.144	-25.6187	-30.6668805356333*
78.2461	-0.343106	-5.82286	-9.63619	-14.6334	-19.2213	-25.7343		80.1161	-0.113584	-5.48027	-10.3625	-15.9387	-20.5402	-25.4965	-31.1274979642701*
78.4459	-0.446874	-5.82753	-9.3805	-14.5539	-19.228	-25.1311		80.3159	-0.286332	-5.57014	-10.4526	-16.1185	-19.5698	-25.6853	-30.5890471829536*
78.6458	-0.461316	-5.72854	-9.77824	-14.6831	-19.26	-25.6048		80.5158	-0.152605	-5.10304	-10.5529	-16.0208	-19.4459	-26.1876	-30.8127105243976*
78.8456	-0.441347	-5.40409	-9.67904	-14.7056	-19.2353	-25.6052		80.7156	0.00746574	-5.251	-10.5136	-16.1889	-19.6261	-25.9567	-31.0309680043182*
79.0454	-0.466862	-5.46033	-9.36763	-14.6577	-19.2077	-25.851		80.9154	-0.0901528	-5.39218	-10.5034	-16.0165	-19.0113	-25.7528	-30.6524301076131*
79.2453	-0.583421	-5.32028	-9.48259	-14.7958	-19.1671	-25.4424		81.1153	-0.0217589	-5.51905	-10.3948	-16.2837	-19.6207	-26.1818	-30.6773108530772*
79.4451	-0.454916	-5.49088	-9.94915	-14.7932	-19.3235	-24.9085		81.3151	-0.198432	-5.3967	-10.688	-16.1368	-19.5851	-25.9763	-30.6228690127742*
79.645	-0.357913	-5.49802	-9.59193	-14.8045	-19.4675	-25.6543		81.515	-0.507766	-5.54775	-10.5846	-16.0251	-20.204	-25.2825	-30.400707640681*
79.8448	-0.168989	-4.40097	-9.01103	-14.5564	-19.3201	-24.6698		81.7148	-0.490344	-5.45252	-10.4657	-16.1379	-19.8306	-25.5706	-31.1536511989102*
80.0446	-0.276105	-4.65109	-9.36329	-14.7296	-19.3088	-24.7824		81.9146	-0.294226	-5.36993	-10.5053	-15.9813	-20.0067	-26.2656	-30.3268461827232*
80.2445	-0.496771	-4.83094	-9.37102	-14.9553	-19.294	-24.7637		82.1145	0.0327198	-5.26148	-10.1017	-15.6029	-18.9748	-25.0416	-29.1772189639097*
80.4443	-0.592254	-4.71794	-8.84915	-14.8817	-19.322	-24.7971		82.3143	-0.0127275	-5.37008	-9.97165	-15.754	-20.0274	-25.0866	-29.888095167148*
80.6442	-0.525256	-4.52404	-9.0482	-14.6863	-19.511	-25.0426		82.5142	0.449376	-5.13305	-9.73448	-15.5967	-18.8712	-24.3447	-28.9225737519552*
80.844	-0.23004	-4.87579	-8.81829	-14.6187	-19.6812	-24.9766		82.714	0.649063	-5.1434	-8.50829	-15.1129	-18.8647	-23.2927	-27.9069429411528*
81.0438	-0.190195	-5.44485	-8.80253	-14.6681	-19.736	-25.3176		82.9138	0.769496	-5.11346	-8.69836	-15.5289	-18.666	-24.3962	-28.1777361430952*
81.2437	-0.405452	-4.93547	-8.99764	-14.5638	-19.5373	-25.0454		83.1137	0.897038	-4.93126	-8.59699	-15.6218	-18.6619	-24.628	-27.9018541216154*
81.4435	-0.155804	-4.93311	-9.14031	-14.6603	-19.5484	-25.0537		83.3135	0.65332	-5.25037	-8.26082	-15.6559	-19.1874	-24.8164	-29.7016159608384*
81.6434	-0.591828	-4.25973	-9.06249	-14.6077	-19.319	-25.0103		83.5134	0.72331	-5.1448	-8.29305	-15.7383	-19.2871	-25.119	-28.4515965101898*
81.8432	0.0577635	-5.84711	-8.56426	-14.556	-19.7119	-25.3643		83.7132	0.522558	-5.1909	-8.19802	-15.705	-18.6251	-24.9711	-29.4957617820259*
82.043	0.0359316	-5.15358	-8.46193	-14.6204	-19.8142	-25.3694		83.913	0.53546	-5.16197	-8.21983	-15.8299	-19.3473	-25.3171	-29.1547690252933*
82.2429	-0.319485	-5.53406	-9.25136	-14.7039	-19.7114	-25.4786		84.1129	0.392046	-5.15394	-8.54711	-15.6807	-19.4453	-24.9511	-29.534129093289*
82.4427	-0.395837	-4.80274	-9.06232	-14.8045	-19.5713	-24.9816		84.3127	0.144009	-5.62309	-8.33866	-15.6288	-20.1114	-25.3097	-29.5505500032074*
82.6426	-0.203432	-4.30485	-9.34769	-14.6987	-19.6036	-24.9298		84.5126	0.127774	-5.69003	-8.31711	-15.5795	-19.4264	-24.7639	-29.6169188993399*
82.8424	-0.08527	-5.01758	-9.27713	-14.7908	-19.7029	-24.9065		84.7124	0.0392865	-5.32278	-8.48881	-15.7784	-19.6072	-24.9413	-30.0909844575522*
83.0422	-0.167675	-5.19519	-9.44131	-14.7627	-19.7372	-25.035		84.9122	0.130366	-5.16531	-8.23144	-15.5097	-18.1125	-24.9691	-28.6577982070471*
83.2421	-0.0950809	-4.84691	-9.3727	-14.8262	-19.7711	-24.825		85.1121	2.33964	-4.03901	-6.9273	-13.9765	-14.542	-20.8319	-25.5581303379459*
83.4419	1.62617	-0.884423	-8.11269	-13.7835	-18.0375	-22.6195		85.3119	2.59605	-3.71899	-7.20867	-13.7547	-15.7441	-20.4472	-26.3015392109697*
83.6418	1.02111	-2.10948	-8.33377	-13.4387	-17.8861	-21.4266		85.5118	2.31369	-4.42508	-7.18233	-14.044	-16.4177	-21.2955	-27.0145561753996*
83.8416	0.618953	-3.51089	-8.02392	-13.0607	-18.5981	-21.5		85.7116	2.51637	-4.41972	-7.52256	-14.2943	-16.7925	-22.1265	-27.5619926179946*
84.0414	0.209335	-3.18948	-8.34853	-13.4144	-18.5039	-22.2505		85.9114	2.38524	-4.50034	-7.47802	-14.3585	-17.1173	-22.4619	-28.380096719364*
84.2413	0.218019	-3.79439	-8.47127	-13.4293	-18.4882	-22.5995		86.1113	2.21956	-4.66014	-7.33577	-14.4434	-18.1674	-22.9024	-28.4095254480366*
84.4411	0.107733	-4.32504	-8.26287	-13.5197	-18.6693	-23.4815		86.3111	2.28991	-4.66601	-7.79847	-14.691	-18.5369	-23.2832	-29.2317299439285*
84.641	0.102455	-5.02385	-8.61803	-13.6364	-18.7296	-23.6675		86.511	1.98533	-4.56789	-7.34507	-14.7719	-17.9253	-22.9618	-29.9867378935296*
84.8408	-0.0750024	-5.04669	-8.70946	-13.6284	-18.6818	-23.5549		86.7108	2.09426	-4.57462	-7.61345	-14.766	-18.5881	-23.85	-29.5467698347367*
85.0406	-0.0856277	-5.11166	-8.70276	-13.6038	-18.7691	-23.7542		86.9106	1.85912	-4.50882	-7.62673	-14.8594	-19.352	-24.0648	-29.5493650758425*
85.2405	-0.00056717	-5.48202	-8.93162	-13.7194	-18.819	-23.8213		87.1105	1.74199	-4.53745	-7.66879	-14.7951	-18.8457	-24.1736	-29.3259835242267*
85.4403	-0.125172	-5.09474	-8.55898	-13.8879	-18.7487	-24.8541		87.3103	1.74746	-4.56985	-7.8928	-14.9687	-19.1368	-24.5308	-30.2145328992972*
85.6402	0.196261	-6.04411	-8.59907	-13.7814	-18.9301	-24.7817		87.5102	1.73345	-4.61005	-7.9389	-14.757	-19.2434	-24.5931	-30.086945538244*
85.84	0.0592951	-5.79399	-8.23918	-13.7882	-19.1801	-24.6657		87.71	1.69053	-4.4436	-8.13922	-14.8019	-18.5163	-24.3687	-30.3181129723804*
86.0398	-0.204299	-5.55023	-8.93597	-14.0655	-19.1504	-24.8743		87.9098	1.09231	-4.61172	-7.8684	-14.6983	-19.6487	-24.8187	-30.5809535149813*
86.2397	-0.0107179	-5.80073	-8.96822	-14.2849	-19.2008	-25.186		88.1097	1.20752	-4.79034	-8.2268	-14.8412	-19.0246	-24.9352	-30.3764100341351*
86.4395	0.0845235	-5.96553	-8.95516	-14.1637	-19.2122	-24.9142		88.3095	0.729053	-5.1768	-8.34607	-14.6681	-19.1617	-24.6019	-30.2237563420651*
86.6394	-0.0249589	-6.05011	-9.56513	-14.2409	-19.2247	-24.681		88.5094	0.888589	-4.70367	-8.41413	-14.8771	-20.283	-24.5097	-30.3402356345136*
86.8392	-0.0512736	-5.85406	-9.43376	-14.2783	-19.2738	-24.4511		88.7092	0.998373	-4.66722	-8.28324	-14.7408	-19.0974	-24.5816	-30.3348525163177*
87.039	-0.178953	-5.90585	-9.60855	-14.3559	-19.2373	-24.6044		88.909	0.716714	-4.78907	-8.47446	-14.7315	-19.8558	-24.6288	-30.6324860288252*
87.2389	-0.210805	-5.77357	-9.52297	-14.2138	-19.328	-24.8962		89.1089	0.958226	-4.58838	-8.56619	-14.9409	-20.4711	-25.3477	-30.1054879002689*
87.4387	-0.158849	-5.28076	-9.34238	-14.3458	-19.4277	-24.7236		89.3087	2.11793	-4.50512	-8.34963	-14.3361	-17.7604	-23.2225	-29.3164126771306*
87.6386	-0.00819895	-4.10356	-9.82319	-14.0943	-18.9768	-24.3723		89.5086	2.2201	-4.62905	-8.58997	-13.7992	-18.4996	-23.2323	-28.9479216453671*
87.8384	0.107913	-2.39465	-8.8213	-13.6541	-18.6246	-23.8001		89.7084	2.16522	-4.5807	-8.58718	-13.9692	-19.6515	-23.3488	-29.2622915177459*
88.0382	0.36021	-4.05538	-8.5736	-13.6241	-18.9037	-24.1392		89.9082	1.90934	-4.90684	-8.47866	-14.1953	-19.5603	-23.6803	-30.3275955753657*
88.2381	0.394533	-4.76514	-8.39308	-13.668	-19.3916	-24.3383		90.1081	1.81931	-4.81594	-8.53158	-14.3043	-19.2961	-23.5159	-30.0327307673232*
88.4379	-0.261446	-5.01178	-9.35769	-13.9275	-19.3407	-24.689		90.3079	1.52128	-4.81545	-8.61121	-14.242	-19.095	-23.8081	-29.9280423664021*
88.6378	-0.170185	-5.1808	-9.31211	-14.3203	-19.4241	-24.5315		90.5078	1.65032	-4.79676	-8.66409	-14.259	-20.4449	-23.8616	-29.5921900793038*
88.8376	-0.0674691	-5.31808	-9.27531	-14.3579	-19.4471	-24.3355		90.7076	1.44408	-4.79472	-8.60006	-14.3479	-19.3411	-24.3322	-29.6761918772793*
89.0374	-0.00621567	-4.75951	-9.20592	-14.313	-19.3592	-24.8399		90.9074	1.66982	-4.61509	-8.79407	-14.703	-19.2173	-24.4534	-30.4431712526676*
89.2373	-0.262432	-4.9966	-9.47973	-14.5703	-19.3906	-24.7969		91.1073	1.27346	-4.59476	-9.04469	-14.4619	-19.3198	-24.932	-30.2246659841934*
89.4371	-0.0242468	-5.58821	-9.4034	-14.3173	-19.4381	-24.8		91.3071	1.17446	-5.06257	-8.98466	-14.5917	-19.9946	-24.7215	-30.7147370454466*
89.637	-0.305764	-5.05273	-9.32121	-14.4256	-19.5753	-24.9596		91.507	1.00277	-4.93952	-9.12344	-14.7532	-19.5952	-24.7829	-30.8890958094127*
89.8368	-0.133827	-5.72584	-9.57665	-14.3485	-19.5847	-24.9001		91.7068	1.49819	-4.6586	-8.957	-14.222	-18.4785	-23.8821	-30.417686444424*
90.0366	0.0200904	-5.57376	-9.54853	-14.2574	-19.6558	-25.1045		91.9066	3.38859	-3.67492	-7.51952	-12.7087	-14.505	-20.5469	-27.9906704545982*
90.2365	-0.214345	-5.16096	-9.90107	-14.7251	-19.6329	-24.7143		92.1065	4.18136	-3.59169	-7.40691	-12.4501	-12.4483	-19.6756	-27.9267118963187*
90.4363	-0.092484	-5.57387	-9.36698	-14.5569	-19.5199	-25.7642		92.3063	4.07391	-3.87412	-7.47874	-12.6978	-14.7002	-20.7296	-29.0719223609235*
90.6362	0.236319	-6.14564	-8.90629	-14.4141	-19.8672	-25.411		92.5062	3.59179	-4.16332	-7.38509	-12.8474	-15.4941	-21.4557	-28.3584371113796*
90.836	0.166062	-7.82417	-9.32474	-14.5668	-19.8081	-25.0987		92.706	3.53973	-4.12958	-7.58028	-13.0436	-15.8198	-21.8455	-29.0551502940279*
91.0358	-0.0547387	-5.08909	-9.34058	-14.6133	-19.6263	-25.5735		92.9058	3.16917	-4.05183	-7.72695	-13.1383	-16.6521	-22.9409	-29.6160794431203*
91.2357	-0.286735	-5.46159	-9.59369	-14.4541	-19.6771	-25.7605		93.1057	3.05671	-4.19193	-7.85029	-13.2248	-17.6982	-22.9388	-29.6889861361879*
91.4355	-0.121057	-5.75994	-9.72782	-14.6539	-19.7373	-25.786		93.3055	3.1333	-4.21177	-7.54445	-13.3324	-17.4605	-23.6003	-28.5120637402585*
91.6354	-0.289644	-5.01301	-10.3371	-14.8295	-19.6674	-25.3168		93.5054	2.97759	-4.2743	-7.80206	-13.3496	-17.6495	-23.3942	-29.4291722756163*
91.8352	-0.241915	-5.39134	-9.82485	-14.9572	-19.6537	-24.9684		93.7052	2.69313	-4.22789	-7.67187	-13.5355	-18.5523	-23.2995	-30.0707073709624*
92.035	-0.527712	-5.36433	-9.86127	-15.1409	-19.7479	-25.204		93.905	2.56616	-4.19946	-7.9856	-13.618	-18.9408	-23.8366	-30.3095137202369*
92.2349	-0.112882	-6.08959	-9.56984	-15.0232	-20.009	-25.2676		94.1049	2.48549	-4.34038	-8.34211	-13.5481	-19.155	-24.5484	-29.5881267564052*
92.4347	-0.0818549	-5.43648	-9.69487	-14.8874	-19.8805	-25.237		94.3047	2.21344	-4.24921	-8.18436	-13.7155	-19.2683	-23.783	-30.5491058059913*
92.6346	-0.0690614	-5.98806	-9.72785	-15.0208	-19.9469	-24.747		94.5046	2.51009	-4.06539	-8.72126	-13.8517	-18.4648	-24.7331	-29.9025715907916*
92.8344	-0.0223232	-5.74109	-9.87127	-14.9271	-19.8962	-25.377		94.7044	2.58131	-3.89469	-8.9578	-13.8667	-19.2586	-24.93	-30.1691186589686*
93.0342	-0.0482287	-6.10413	-9.88985	-14.901	-19.9788	-25.3837		94.9042	2.13908	-4.2888	-8.56203	-13.778	-19.7651	-24.7835	-29.8263634762981*
93.2341	-0.0909727	-5.85769	-9.78195	-15.1853	-19.9376	-25.3022		95.1041	1.62521	-4.52071	-8.48249	-13.7989	-19.0959	-24.8531	-30.8608260807116*
93.4339	-0.0940671	-5.27194	-10.0825	-14.9776	-19.9094	-26.1305		95.3039	1.57638	-4.67644	-8.52631	-13.9263	-19.7402	-24.7213	-30.7983001246339*
93.6338	-0.102437	-5.97906	-10.2146	-15.0882	-20.0234	-25.7165		95.5038	1.3095	-4.69283	-8.51074	-13.8731	-19.7757	-25.1638	-30.6600334294436*
93.8336	-0.473935	-5.48531	-10.5543	-15.0783	-19.9994	-25.3293		95.7036	1.21042	-4.61564	-8.69613	-13.8574	-19.7177	-24.9639	-30.1956326255268*
94.0334	-0.224013	-6.20516	-10.0201	-15.2596	-20.0573	-25.2568		95.9034	1.53574	-4.26936	-8.59677	-14.1123	-19.6836	-25.3443	-31.0043446650979*
94.2333	-0.0460535	-5.48092	-10.2031	-15.0321	-20.0871	-25.5023		96.1033	1.20892	-4.42042	-8.73631	-13.9761	-21.0637	-25.5254	-29.9923244166753*
94.4331	-0.0368288	-6.11644	-10.2448	-15.0638	-20.0853	-25.4104		96.3031	1.25338	-4.36218	-8.87167	-14.1046	-19.9449	-25.0022	-30.2056265894885*
94.633	-0.0262208	-5.94345	-10.2948	-15.1829	-20.1148	-25.344		96.503	0.982391	-4.54829	-8.96834	-14.2484	-20.1856	-25.4096	-30.9069934435884*
94.8328	-0.169242	-5.96801	-10.1082	-15.186	-20.0151	-26.0454		96.7028	1.17234	-4.39777	-8.97463	-14.4523	-20.1642	-25.225	-30.7885944096054*
95.0326	-0.0188316	-6.36161	-9.92397	-15.2118	-20.1881	-25.8862		96.9026	1.04143	-4.42007	-8.91521	-14.4823	-20.2612	-25.0535	-30.6493320115353*
95.2325	0.167146	-6.02089	-9.54844	-15.3787	-20.3189	-25.4082		97.1025	0.952717	-4.47776	-8.96485	-14.4909	-19.4141	-25.1056	-31.2090357501398*
95.4323	-0.023788	-5.73162	-9.73648	-14.9924	-20.2159	-25.2851		97.3023	0.894305	-4.32864	-8.94132	-14.3354	-20.062	-25.3881	-30.5427083353871*
95.6322	0.00381223	-6.45859	-9.68124	-15.1024	-20.2524	-25.2621		97.5022	0.760134	-4.65903	-8.97029	-14.3404	-20.014	-25.4929	-31.0263454229953*
95.832	0.112584	-5.81564	-9.77883	-15.1366	-20.2262	-25.4548		97.702	0.819043	-4.69117	-9.13032	-14.547	-19.6198	-25.5446	-30.6897928460986*
96.0318	0.253366	-3.86962	-9.92785	-15.1746	-20.2005	-25.2787		97.9018	0.547138	-4.52991	-9.14577	-14.5089	-20.0996	-25.4223	-30.8174529630566*
96.2317	0.183421	-5.22254	-9.80244	-15.1937	-20.2189	-25.2614		98.1017	0.483593	-4.4229	-9.29636	-14.6106	-20.0539	-25.3636	-31.6414819286838*
96.4315	-0.034599	-5.2443	-10.2026	-15.2015	-20.1343	-25.7275		98.3015	0.649912	-4.31923	-9.15758	-14.6161	-19.4927	-26.1475	-30.8600532624417*
96.6314	-0.112312	-4.89217	-10.1562	-15.3806	-20.0971	-25.6044		98.5014	1.30166	-4.09278	-8.53131	-14.2878	-17.0028	-24.7742	-29.8952258371455*
96.8312	-0.300375	-5.36193	-10.3287	-15.4269	-20.1478	-25.5382		98.7012	2.36667	-3.37608	-8.40917	-13.5895	-17.9345	-21.6181	-32.2139590023356*
97.031	-0.180945	-5.25163	-10.0824	-15.2499	-20.2491	-26.0125		98.901	3.34713	-2.2448	-6.84633	-12.6901	-15.2728	-20.1576	-29.2318097730081*
97.2309	-0.113727	-5.30427	-10.1737	-15.2321	-20.2526	-25.6985		99.1009	4.29897	-1.56549	-6.50118	-11.8911	-11.795	-19.1764	-29.0534591001919*
97.4307	-0.117206	-5.68017	-9.92676	-15.4488	-20.3343	-25.4346		99.3007	4.70272	-1.96158	-6.60973	-12.4638	-13.4807	-20.7534	-29.3246569059312*
97.6306	-0.0884911	-5.7916	-9.8082	-15.3654	-20.2178	-26.1453		99.5006	3.92937	-2.11785	-6.95706	-12.2619	-14.8133	-20.6949	-28.802247903263*
97.8304	-0.132606	-6.40834	-9.7055	-15.4086	-20.2517	-25.1962		99.7004	3.8032	-2.37785	-6.90621	-12.3986	-15.842	-22.1278	-29.4322055532106*
98.0302	-0.0344114	-5.20767	-10.1819	-15.3088	-20.3904	-25.5531		99.9002	3.43979	-2.61419	-7.01761	-12.6881	-16.4204	-22.3311	-30.4981486983343*
98.2301	-0.116888	-5.73162	-10.4256	-15.5296	-20.3462	-24.9972		100.1	2.95432	-2.77649	-7.02442	-12.3053	-17.2488	-22.0507	-30.0335949682831*
98.4299	-0.12388	-5.61668	-10.4042	-15.5123	-20.4363	-25.5215		100.3	3.19799	-2.70016	-7.24758	-12.7056	-17.2974	-23.398	-30.5207405553146*
98.6298	-0.104219	-5.85946	-10.0203	-15.3802	-20.4347	-25.4824		100.5	2.99822	-2.81528	-7.41012	-12.9073	-17.3593	-23.7013	-29.9489940428301*
98.8296	-0.355204	-5.17761	-10.3861	-15.4701	-20.3291	-25.6241		100.7	2.97452	-2.69577	-7.59823	-12.9628	-18.0991	-23.4538	-30.1484569372234*
99.0294	0.0586678	-5.84982	-10.1374	-15.4002	-20.4485	-24.9963		100.899	2.74953	-2.83807	-7.59118	-13.0069	-18.4851	-24.1438	-30.0192480087572*
99.2293	0.0272164	-6.08954	-10.0902	-15.3433	-20.5108	-25.4922		101.099	2.78028	-3.00908	-7.76381	-13.0671	-18.2609	-23.6794	-30.9377540215219*
99.4291	-0.0996643	-6.25706	-10.5498	-15.3978	-20.4806	-25.3707		101.299	2.32418	-2.97338	-7.70367	-13.2558	-19.0957	-24.5594	-30.8071029295589*
99.629	-0.107296	-5.53158	-10.3671	-15.4327	-20.47	-26.0951		101.499	2.3858	-2.97146	-7.82831	-13.2867	-19.0436	-24.8611	-30.3814256201579*
99.8288	-0.106217	-5.45502	-10.2291	-15.5752	-20.4263	-25.6729		101.699	2.26509	-3.10306	-8.0963	-13.4205	-19.067	-24.6746	-31.1366542005052*
100.029	-0.263469	-5.50829	-10.4602	-15.4732	-20.5088	-25.5665		101.899	2.01731	-2.92791	-8.21849	-13.6252	-19.6882	-25.1237	-30.8235809252294*
100.228	-0.209424	-5.36559	-10.4098	-15.2914	-20.3646	-25.8125		102.099	1.9878	-3.09113	-8.0774	-13.4738	-19.004	-25.3587	-30.9863021559257*
100.428	-0.166458	-5.37003	-10.2589	-15.6809	-20.41	-25.2959		102.298	1.93228	-3.18594	-8.29276	-13.6585	-19.9575	-25.0428	-30.7397139951862*
100.628	-0.0675945	-6.24348	-10.0192	-15.558	-20.6219	-25.7104		102.498	1.88588	-3.32561	-8.52826	-13.8118	-19.5227	-24.9732	-31.2780396882013*
100.828	-0.132439	-5.64614	-10.0151	-15.7121	-20.6243	-25.6671		102.698	1.6216	-3.22232	-8.60717	-13.6966	-19.7171	-25.2781	-30.8732737313085*
101.028	-0.174753	-5.63738	-10.0693	-15.4668	-20.5285	-25.5508		102.898	1.51219	-3.21791	-8.65635	-13.7966	-19.9693	-25.268	-30.6866745084594*
101.228	-0.109339	-5.60241	-10.3326	-15.5059	-20.6292	-25.6501		103.098	1.3243	-3.66519	-8.87818	-13.7688	-19.7757	-25.1418	-30.4575413967416*
101.427	-0.316624	-5.59762	-10.4146	-15.4463	-20.5712	-25.5321		103.297	0.957916	-3.71902	-8.86929	-13.6368	-20.8057	-25.2004	-31.1851115890321*
101.627	-0.174681	-5.78404	-10.3957	-15.377	-20.5202	-25.6631		103.497	1.41404	-3.49081	-8.94991	-14.2615	-20.1375	-25.7004	-30.7192124774402*
101.827	-0.258434	-5.84487	-10.0616	-15.3547	-20.5703	-25.7061		103.697	0.928717	-3.63457	-9.00091	-13.9967	-20.0393	-25.2721	-30.7074107373456*
102.027	-0.145064	-6.27062	-10.3422	-15.4286	-20.681	-24.9563		103.897	0.591129	-3.81634	-9.06995	-13.9708	-20.1822	-25.4248	-30.804980749666*
102.227	-0.295982	-5.92416	-10.21	-15.4414	-20.6579	-25.5294		104.097	1.19062	-3.72581	-9.07134	-14.3135	-19.4729	-25.5059	-30.8845646562666*
102.427	-0.282234	-5.61624	-10.2312	-15.4128	-20.5755	-25.4757		104.297	1.06382	-4.04402	-8.87754	-14.4317	-19.7153	-25.4733	-30.6001149958685*
102.627	-0.304809	-5.34519	-10.398	-15.551	-20.6069	-25.5782		104.497	0.769522	-4.22956	-8.91437	-14.2583	-20.5185	-25.3222	-30.7586025561429*
102.826	-0.334007	-5.64153	-10.2778	-15.5652	-20.5531	-26.2401		104.696	0.695623	-4.07383	-9.19216	-14.4867	-19.978	-25.1268	-31.0826908798136*
103.026	-0.259977	-5.84288	-10.032	-15.4196	-20.6914	-25.8089		104.896	0.743766	-4.05588	-9.2238	-14.4967	-19.78	-25.6946	-30.4534471429175*
103.226	-0.0389675	-6.00382	-10.2092	-15.5425	-20.7878	-25.5033		105.096	1.33247	-3.21822	-9.58537	-14.5816	-19.425	-25.933	-30.3898038071577*
103.426	-0.293418	-5.62022	-10.3221	-15.4787	-20.6778	-25.685		105.296	0.631699	-3.91666	-9.45726	-14.4493	-19.4324	-25.5414	-30.5780949061426*
103.626	-0.294942	-5.5655	-10.1861	-15.5544	-20.7493	-25.3669		105.496	0.546729	-3.97757	-9.42606	-14.5226	-19.5964	-25.8623	-30.2974654424717*
103.826	-0.138197	-6.17397	-10.3782	-15.3298	-20.6662	-25.1026		105.696	0.390349	-4.03664	-9.57588	-14.5043	-20.2425	-25.3601	-30.6393185792853*
104.025	-0.396333	-5.19821	-10.5644	-15.2587	-20.5854	-25.1794		105.895	0.606208	-4.12602	-9.53105	-14.692	-19.8339	-25.4416	-30.6629648169304*
104.225	-0.221369	-5.10603	-10.4321	-15.4969	-20.5042	-25.5354		106.095	0.40086	-4.12055	-9.57495	-14.6761	-19.6944	-25.7326	-30.8193131398162*
104.425	-0.324194	-5.72161	-10.6103	-15.579	-20.6203	-25.3198		106.295	0.326685	-4.30923	-9.77878	-14.7974	-19.5314	-25.7031	-30.9932932273788*
104.625	-0.184374	-5.84877	-10.3179	-15.6431	-20.774	-25.0121		106.495	0.371806	-3.95328	-9.68344	-14.832	-19.8316	-25.3996	-30.9883106191809*
104.825	-0.407809	-5.52427	-10.8147	-15.5955	-20.6982	-25.9972		106.695	0.4662	-4.12184	-9.8211	-14.9108	-20.3458	-25.5825	-31.0033193958923*
105.025	-0.361541	-5.87542	-10.6189	-15.775	-20.6318	-25.2928		106.895	0.022366	-4.42427	-9.85766	-14.8737	-20.2435	-25.5196	-30.2821287069772*
105.225	-0.240138	-6.1169	-10.8766	-15.5839	-20.7249	-25.8214		107.094	0.162458	-4.58114	-9.77366	-14.8401	-20.4306	-25.4388	-30.6072682272469*
105.424	-0.296136	-5.74094	-10.4868	-15.6916	-20.7377	-25.3845		107.294	0.657132	-3.99548	-10.152	-14.9985	-20.0022	-26.1833	-30.3966254408205*
105.624	-0.326065	-5.82153	-10.448	-15.7861	-20.7222	-25.4869		107.494	1.00956	-3.51456	-10.3825	-14.8654	-19.3641	-25.9995	-30.3875797371574*
105.824	-0.242423	-5.77861	-10.5156	-15.6331	-20.7849	-25.9492		107.694	0.51877	-3.88724	-10.3347	-14.9593	-19.6306	-26.4002	-30.616682145383*
106.024	-0.164241	-6.4934	-10.1165	-15.7017	-20.835	-25.3694		107.894	-0.209294	-4.37103	-10.2675	-14.6792	-20.6181	-25.2975	-30.7208252067962*
106.224	-0.13685	-6.15285	-10.1316	-15.6176	-20.8395	-25.372		108.094	0.318456	-3.84001	-10.2054	-14.9841	-19.8163	-26.4258	-30.7295895754977*
106.424	-0.141296	-5.74709	-10.0449	-15.532	-20.7618	-26.1777		108.293	0.694787	-3.3976	-10.6316	-15.0794	-19.2295	-26.4341	-29.6509360943441*
106.623	-0.211351	-5.6285	-10.0977	-15.5071	-20.8555	-25.9604		108.493	0.488647	-3.87378	-10.5089	-15.0199	-20.2686	-26.1548	-30.7143663292077*
106.823	-0.103034	-6.00096	-10.1428	-15.7279	-20.8554	-24.8922		108.693	0.242138	-4.04178	-10.5182	-15.0657	-19.8179	-26.0764	-30.353052864183*
107.023	-0.284387	-6.20932	-10.3071	-15.6557	-20.7816	-25.3501		108.893	0.0534141	-4.0062	-10.4998	-15.0041	-20.383	-25.9915	-30.7154339010025*
107.223	-0.316801	-5.50536	-10.3657	-15.4773	-20.7943	-25.8683		109.093	0.491582	-3.74052	-10.7566	-15.0528	-19.6811	-26.0109	-29.9842171368215*
107.423	-0.197106	-6.04531	-10.4719	-15.672	-20.7396	-25.2601		109.293	0.539519	-3.89362	-10.7403	-15.2182	-19.438	-26.109	-30.0980496495097*
107.623	-0.331554	-5.68475	-10.3524	-15.5097	-20.7937	-25.4785		109.493	0.509035	-3.72454	-10.7037	-15.2409	-19.5041	-26.1281	-30.8272562469602*
107.822	-0.215105	-4.72487	-10.4656	-15.0093	-20.674	-25.1095		109.692	0.137307	-4.07232	-10.5882	-15.1606	-19.2959	-26.0545	-30.9959603373996*
108.022	-0.235056	-5.55443	-10.2175	-15.0244	-20.6921	-25.2059		109.892	-0.00173018	-4.18695	-10.8381	-15.1555	-20.2994	-26.1345	-31.1371704740404*
108.222	-0.344783	-4.74071	-11.0022	-15.1284	-20.6471	-25.3325		110.092	0.256748	-4.03856	-10.6241	-15.299	-19.839	-25.973	-31.1737649429216*
108.422	-0.413989	-5.31888	-10.5798	-15.3645	-20.6613	-26.0396		110.292	-0.133134	-4.03616	-10.6215	-15.2224	-20.7067	-26.1449	-30.4828458503978*
108.622	-0.246859	-5.67913	-10.8874	-15.3347	-20.792	-25.3165		110.492	0.0132922	-4.21465	-10.6097	-15.443	-19.3633	-26.5548	-30.1302792417124*
108.822	-0.225048	-5.39001	-10.5109	-15.5331	-20.7267	-25.5372		110.692	-0.1555	-4.40802	-10.4207	-15.3716	-20.9978	-26.2026	-30.7996590384545*
109.021	-0.241213	-5.23062	-10.8719	-15.3776	-20.74	-25.8055		110.891	-0.189818	-4.45142	-10.5719	-15.4528	-20.7698	-26.0836	-30.5479224706593*
109.221	-0.28216	-5.14535	-10.7458	-15.4486	-20.6783	-25.7027		111.091	-0.36759	-4.67076	-10.5413	-15.4971	-20.0405	-25.4726	-31.1776247130387*
109.421	-0.206436	-4.89574	-10.7564	-15.465	-20.7994	-25.0555		111.291	-0.147766	-4.6286	-10.5941	-15.5363	-19.9516	-25.6621	-31.3746981479538*
109.621	-0.1566	-4.78773	-10.7304	-14.8556	-20.7088	-24.9342		111.491	-0.053217	-4.55097	-10.551	-15.4583	-20.3281	-25.3567	-29.7411072473486*
109.821	-0.584159	-3.71756	-10.932	-15.01	-20.705	-25.0659		111.691	1.04707	-3.95236	-10.3255	-14.6596	-18.488	-24.0124	-29.3587864529735*
110.021	-0.445991	-4.93308	-10.7955	-14.9676	-20.7159	-24.9679		111.891	0.94886	-3.86268	-10.293	-14.7678	-19.6942	-24.3423	-29.2185795245106*
110.221	-0.327953	-5.79912	-10.2168	-14.9042	-20.8008	-25.052		112.091	0.843584	-3.97639	-10.32	-14.9613	-19.4992	-24.9898	-29.2507788453443*
110.42	-0.341662	-5.25848	-10.5664	-15.0633	-20.7334	-25.3388		112.29	0.708674	-4.08916	-10.2215	-15.0047	-20.2643	-25.01	-29.3563763425539*
110.62	-0.129799	-5.78678	-10.5315	-15.0412	-20.8742	-25.172		112.49	0.626898	-4.08318	-9.94257	-14.9922	-19.7256	-25.4097	-29.8251873051142*
110.82	-0.280945	-5.3883	-10.5443	-15.1627	-20.9162	-25.3578		112.69	0.830538	-3.97953	-9.93906	-15.0261	-19.4454	-24.9806	-29.5401422016578*
111.02	-0.218474	-5.34122	-10.693	-15.2855	-20.8965	-25.3177		112.89	0.340326	-4.29645	-10.0781	-14.9497	-20.4307	-25.057	-30.4706144888459*
111.22	-0.504292	-4.79824	-10.7551	-15.1592	-20.8601	-25.5735		113.09	0.415303	-4.56636	-10.1381	-15.2108	-20.6618	-25.7793	-30.0858256795392*
111.419	-0.193047	-5.57009	-10.8456	-15.1506	-20.956	-25.4802		113.29	0.503648	-4.25053	-10.0979	-15.2228	-20.5039	-25.4957	-30.1278031756429*
111.619	-0.394688	-5.4107	-10.3087	-15.3733	-20.7896	-25.0389		113.489	0.530607	-3.9698	-10.243	-15.1562	-19.9268	-25.7811	-29.4227784439445*
111.819	-0.191119	-5.84477	-10.6412	-15.1126	-20.7633	-25.5735		113.689	0.370821	-4.27094	-10.1936	-15.3454	-19.8558	-25.7413	-29.9449695427916*
112.019	-0.312565	-5.33729	-10.4439	-15.2758	-20.7794	-25.2821		113.889	0.140067	-4.44951	-10.2478	-15.295	-20.1222	-25.4702	-29.950476293716*
112.219	-0.269591	-5.4445	-10.6696	-15.3295	-20.7944	-25.7103		114.089	0.2762	-4.71674	-10.2101	-15.3618	-20.5994	-25.3292	-30.0661091022567*
112.419	-0.272711	-5.31507	-10.3064	-15.3558	-20.8735	-25.3434		114.289	0.199188	-4.28636	-10.2692	-15.3299	-20.5295	-25.3169	-29.9943474151912*
112.619	-0.288598	-5.57841	-10.7128	-15.3126	-20.7843	-25.305		114.489	0.0987495	-4.75969	-10.1997	-15.4327	-19.8097	-24.9915	-29.8716608159231*
112.818	-0.257549	-5.82818	-10.6047	-15.462	-20.929	-25.3897		114.688	1.48779	-4.2767	-10.5232	-14.5813	-19.9916	-24.2837	-30.1283504255902*
113.018	-0.309402	-5.42139	-10.6973	-15.2641	-20.8764	-25.6138		114.888	1.28807	-4.38759	-10.3767	-14.6233	-19.711	-24.2238	-29.7680223834613*
113.218	-0.137407	-5.48516	-10.6906	-15.3353	-20.8613	-24.9446		115.088	1.20319	-4.38519	-10.7248	-14.6585	-19.4301	-24.9516	-29.7271580822674*
113.418	-0.200126	-5.35749	-10.2393	-15.4024	-20.8405	-25.5449		115.288	1.23646	-4.40574	-10.5618	-14.9758	-19.5334	-24.528	-29.5200098081178*
113.618	-0.403849	-5.52575	-10.3248	-15.4387	-20.8268	-25.395		115.488	0.94562	-4.46107	-10.6736	-14.9637	-19.7463	-24.9978	-30.0961071646477*
113.818	-0.417328	-5.69069	-10.729	-15.3266	-20.8841	-25.0466		115.688	0.68969	-4.55208	-10.5455	-15.0311	-20.1311	-25.3091	-29.9894195933951*
114.017	-0.618999	-5.59559	-10.7288	-15.2807	-20.7589	-26.3911		115.887	0.76902	-4.68232	-10.6054	-15.1439	-19.8978	-25.2941	-30.6451529250996*
114.217	-0.307477	-5.18516	-10.6435	-15.2417	-20.8127	-25.4551		116.087	0.85861	-4.44632	-10.575	-15.1856	-19.6084	-25.3764	-30.8680170660137*
114.417	-0.370326	-5.34546	-10.803	-15.3757	-20.8894	-25.1444		116.287	0.255435	-5.01534	-10.4106	-14.9465	-20.7294	-24.9861	-30.1351067631597*
114.617	-0.133193	-5.73228	-10.3102	-15.3484	-20.8088	-25.2037		116.487	-0.368549	-5.41986	-10.4204	-14.6888	-20.8046	-24.8815	-30.3067799722664*
114.817	-0.463366	-5.98363	-10.6097	-15.4195	-20.9446	-25.4186		116.687	-0.490555	-5.77188	-10.5957	-14.6582	-21.4282	-24.8277	-29.84873943087*
115.017	-0.468353	-5.40545	-10.8252	-15.407	-20.9157	-25.2826		116.887	-0.679443	-5.95108	-10.8019	-14.6138	-21.403	-24.9943	-29.6300672718583*
115.216	-0.277894	-5.69301	-10.5875	-15.4417	-20.8243	-25.3403		117.087	-0.636649	-6.38273	-10.96	-14.5503	-22.1001	-25.6257	-28.9419337820919*
115.416	-0.466113	-5.57153	-10.6483	-15.3954	-20.9172	-25.4155		117.286	-0.249204	-5.94846	-10.9165	-14.6023	-21.4648	-25.566	-29.2873155461736*
115.616	-0.251583	-3.80652	-10.4747	-14.6223	-20.64	-24.3743		117.486	-0.012301	-5.82783	-10.9281	-14.9337	-21.0584	-26.0238	-30.0436158603446*
115.816	-0.162722	-4.31938	-10.3551	-14.6271	-20.8005	-24.5381		117.686	1.1491	-4.11141	-11.4029	-14.8445	-19.2908	-26.1027	-29.4953701419257*
116.016	-0.292223	-4.33766	-9.99655	-14.7882	-20.8021	-25.1059		117.886	0.786164	-4.6285	-11.2681	-14.8935	-19.3948	-26.5633	-28.9290478675733*
116.216	-0.0466094	-5.43631	-10.4694	-14.6664	-20.8642	-24.6676		118.086	0.635703	-4.51763	-11.2624	-14.9378	-19.8288	-26.2299	-29.2539797412625*
116.415	-0.152519	-4.83018	-10.924	-14.4449	-21.0376	-26.6149		118.285	0.17399	-4.88454	-11.0966	-14.9281	-20.6041	-25.8343	-29.5833254125278*
116.615	-0.161584	-5.36612	-10.3175	-14.9093	-20.9255	-25.169		118.485	0.324118	-4.63402	-11.0082	-15.0213	-20.3642	-25.615	-30.0296387209706*
116.815	-0.132377	-5.60177	-10.4946	-14.9299	-20.9959	-25.1109		118.685	0.483055	-4.611	-10.8863	-15.2362	-19.611	-26.197	-29.3761532578843*
117.015	-0.180482	-5.37773	-10.3354	-15.166	-20.9762	-25.1744		118.885	-0.0115161	-4.81934	-10.8161	-15.1494	-21.1942	-25.8653	-30.2681008499827*
117.215	-0.395876	-5.17267	-10.461	-14.9599	-20.9149	-25.3476		119.085	0.0897561	-4.92709	-10.6049	-15.1395	-20.3809	-26.1435	-29.48494664748*
117.415	-0.170707	-5.38055	-10.3767	-15.1726	-20.9756	-25.2281		119.285	0.138975	-5.02941	-10.5003	-15.3831	-20.5073	-25.7378	-30.1487765037187*
117.615	-0.339638	-5.61672	-10.0549	-15.1483	-20.9149	-25.539		119.485	0.222897	-4.68374	-10.685	-15.4542	-19.5605	-25.9593	-30.1202675152119*
117.814	-0.15317	-5.81371	-10.2704	-15.0715	-20.9668	-25.5781		119.684	0.371196	-4.60556	-10.7916	-15.5608	-19.5409	-26.3515	-30.3590996326765*
118.014	0.113443	-5.78052	-10.0665	-15.0781	-21.0997	-25.2645		119.884	0.551128	-4.65688	-10.8377	-15.4733	-18.8548	-25.8996	-29.9103611577313*
118.214	-0.194355	-5.28398	-10.4137	-15.0875	-20.9553	-25.2094		120.084	0.314863	-4.51537	-10.5967	-15.4829	-19.7211	-25.8879	-29.8507466659855*
118.414	-0.11057	-5.85334	-10.583	-15.2842	-21.0187	-25.4955		120.284	-0.217106	-5.0925	-10.5565	-15.3853	-21.1177	-25.8484	-29.997196626487*
118.614	-0.178682	-5.45363	-10.3963	-15.1368	-20.9996	-25.1988		120.484	-0.18692	-5.22527	-10.51	-15.5188	-20.805	-25.5149	-29.8734879693711*
118.814	-0.11253	-5.28547	-10.7858	-15.1757	-20.9833	-25.5866		120.684	-0.197148	-5.20086	-10.5541	-15.4138	-20.065	-26.1941	-29.7324499997198*
119.013	-0.195891	-5.60587	-10.2918	-15.2131	-21.0097	-25.3092		120.883	0.071658	-4.89971	-10.5715	-15.6171	-19.7952	-26.0873	-29.6813377825689*
119.213	-0.234518	-5.70834	-10.6633	-15.2213	-21.0008	-25.2592		121.083	0.128804	-4.85536	-10.4045	-15.5397	-20.1271	-25.9238	-30.1584443283635*
119.413	-0.192234	-5.68506	-10.4869	-15.1769	-20.8494	-25.792		121.283	0.000792103	-4.77698	-10.618	-15.4583	-20.271	-25.8657	-29.7016550793618*
119.613	-0.660755	-5.24014	-10.5424	-15.3285	-20.9489	-25.4656		121.483	0.267777	-4.27177	-10.9679	-15.4072	-19.5142	-26.1377	-29.6129153913927*
119.813	-0.385323	-5.64931	-10.9694	-14.9106	-20.8657	-25.3206		121.683	0.199538	-4.50581	-10.8258	-15.3438	-20.1876	-25.8064	-29.5003422881929*
120.013	-0.467767	-5.57599	-10.3631	-15.3765	-20.9338	-25.2069		121.883	0.104002	-4.30669	-10.798	-15.3591	-20.5795	-25.8756	-30.320075494114*
120.213	-0.591499	-4.89115	-11.1141	-15.3399	-20.9061	-25.2614		122.082	0.0167094	-4.43159	-10.6066	-15.4811	-20.241	-25.924	-29.6779253737046*
120.412	-0.510369	-5.17815	-11.2226	-15.4638	-20.9224	-24.9083		122.282	-0.11487	-4.53393	-10.6427	-15.5095	-20.8076	-25.9319	-30.1076010510608*
120.612	-0.499388	-5.00093	-11.0708	-15.2948	-20.966	-25.6723		122.482	-0.159593	-4.58225	-10.2131	-15.3837	-20.5705	-26.0896	-30.2982983031263*
120.812	-0.393971	-5.63244	-10.7673	-15.3809	-21.0414	-25.4013		122.682	-0.197423	-4.46655	-10.2443	-15.546	-20.7875	-25.4564	-30.4122623882386*
121.012	-0.127448	-5.28786	-10.1003	-15.4841	-21.0025	-25.5653		122.882	-0.138202	-4.41888	-10.2069	-15.5425	-20.9539	-25.9964	-30.753250823739*
121.212	0.0391816	-6.22076	-9.86301	-15.2891	-21.0789	-26.1335		123.082	-0.109741	-4.52262	-10.1753	-15.4668	-20.3812	-25.7758	-30.1631586562696*
121.412	-0.694328	-5.48038	-11.072	-15.431	-20.8981	-25.3635		123.281	-0.248272	-4.49823	-10.1638	-15.6173	-20.3511	-25.6851	-30.2507906759574*
121.611	-0.25724	-5.12422	-10.7442	-15.4154	-20.9374	-25.2362		123.481	-0.200967	-4.50633	-10.2617	-15.6208	-20.943	-25.7446	-30.231631469403*
121.811	-0.493795	-5.50676	-11.2864	-15.5159	-20.9664	-25.1489		123.681	-0.0503536	-4.43432	-10.3032	-15.6899	-19.982	-25.8925	-30.2764058034679*
122.011	-0.374316	-5.66691	-11.0423	-15.2428	-20.9114	-25.7638		123.881	-0.171279	-4.54235	-10.2117	-15.7305	-20.707	-26.0713	-30.1819109392077*
122.211	-0.311564	-5.49665	-10.5249	-15.2943	-20.9554	-25.4492		124.081	0.349775	-4.36624	-9.5667	-15.2771	-19.257	-25.3015	-29.9985152393586*
122.411	-0.306942	-5.55367	-10.4762	-15.3372	-20.9408	-25.275		124.281	0.36001	-4.36593	-9.77383	-15.4838	-19.5159	-25.6322	-29.6630541941248*
122.611	-0.197952	-5.70009	-10.3326	-15.4071	-21.0308	-25.4662		124.481	0.34549	-4.483	-9.84536	-15.5853	-19.5181	-25.733	-29.6952209920002*
122.81	-0.348194	-5.37724	-10.5309	-15.217	-20.9589	-25.2853		124.68	0.20411	-4.24466	-9.89145	-15.5421	-20.112	-25.6564	-30.3611826940461*
123.01	-0.375023	-5.46545	-10.5795	-15.3344	-21.043	-25.197		124.88	0.175668	-4.21394	-9.87281	-15.5304	-19.9097	-25.6612	-29.8932716849565*
123.21	-0.236936	-5.01579	-10.528	-15.3068	-20.9873	-25.6818		125.08	0.000971896	-4.32262	-9.91496	-15.6047	-19.7815	-25.8997	-30.3218483364959*
123.41	-0.165589	-5.98082	-10.6026	-15.4531	-21.0177	-25.4304		125.28	-0.190641	-4.49448	-9.62277	-15.5346	-20.6709	-26.112	-30.5009788780135*
123.61	-0.400862	-5.53908	-10.3324	-15.1763	-21.0645	-25.5969		125.48	-0.0673603	-4.38576	-9.75376	-15.6756	-20.2096	-25.6461	-30.0965387420311*
123.81	-0.0558695	-6.03974	-10.712	-15.3246	-21.1168	-25.7251		125.68	0.0387887	-4.35746	-9.96812	-15.7529	-19.4249	-26.3255	-30.448874369482*
124.009	-0.161627	-5.90861	-10.8798	-15.2361	-21.0867	-25.4531		125.879	9.46077e-05	-4.58161	-9.93573	-15.7349	-19.942	-25.9014	-30.1491006188795*
124.209	-0.161268	-6.00281	-10.4473	-15.3544	-21.0623	-25.1056		126.079	0.0227716	-4.6141	-9.81046	-15.8945	-19.5091	-25.8933	-30.756496069146*
124.409	-0.243366	-5.882	-10.7293	-15.3067	-21.0937	-25.8431		126.279	-0.0198489	-4.63498	-9.88537	-15.7468	-20.3261	-25.8336	-29.9791399777881*
124.609	-0.104235	-5.44557	-10.549	-15.3838	-21.1367	-26.0157		126.479	-0.47476	-4.72482	-9.77559	-15.6122	-20.3131	-25.5039	-30.243250125711*
124.809	-0.524069	-5.1186	-10.1759	-15.3388	-21.0524	-26.355		126.679	-0.449869	-4.72867	-9.90435	-15.8636	-20.9967	-26.0177	-30.171354055146*
125.009	-0.0536611	-5.91061	-10.451	-15.3938	-21.0186	-25.716		126.879	-0.369021	-4.58371	-10.0257	-15.8534	-20.1745	-26.0585	-30.4038541800464*
125.209	-0.141768	-5.92803	-10.3799	-15.3703	-21.1237	-25.4967		127.079	-0.475701	-4.77704	-10.0943	-15.7907	-19.5089	-25.7499	-30.0469340208596*
125.408	-0.139862	-6.32875	-10.6382	-15.3589	-21.0812	-25.4112		127.278	-0.53675	-4.87901	-9.97409	-15.7295	-20.8401	-25.8028	-29.9690881820931*
125.608	-0.105024	-6.21348	-10.3601	-15.5167	-21.1526	-25.3711		127.478	-0.481382	-4.94902	-9.82991	-15.9367	-19.8069	-25.4992	-30.2153792012583*
125.808	-0.262591	-6.27496	-10.678	-15.4379	-21.0309	-25.5472		127.678	-0.412826	-5.06205	-10.0246	-15.9725	-19.9239	-25.6187	-30.1594009354632*
126.008	-0.450165	-5.31586	-10.8965	-15.5121	-21.0498	-25.6902		127.878	-0.468936	-5.22857	-10.0558	-15.9191	-20.3476	-25.5996	-30.6695007943994*
126.208	-0.709133	-5.19122	-10.8894	-15.532	-20.9276	-25.8054		128.078	-0.554846	-5.22544	-10.0268	-15.9902	-19.9938	-25.6216	-30.4104984157544*
126.407	-0.336894	-5.91074	-10.8212	-15.6487	-21.118	-25.1185		128.278	-0.619371	-5.48304	-10.0165	-15.9413	-20.3983	-25.4329	-30.7576737186461*
126.607	-0.205759	-5.6333	-10.3043	-15.4318	-21.1356	-25.6828		128.477	-0.732135	-5.51921	-10.0707	-16.0346	-20.7437	-25.3022	-30.6692999708172*
126.807	-0.213962	-6.08633	-10.5289	-15.4458	-21.1049	-25.2214		128.677	-0.0343495	-4.82251	-10.1658	-15.9232	-19.5178	-25.8375	-29.8469535793048*
127.007	-0.0996238	-5.4286	-10.5226	-15.3451	-21.1341	-25.2253		128.877	-0.296098	-5.11329	-10.0401	-15.8434	-19.7332	-25.6835	-29.5243242173525*
127.207	-0.339874	-6.34164	-10.7261	-15.2721	-21.0749	-25.3321		129.077	-0.747966	-5.52456	-9.86115	-15.639	-21.2284	-25.5215	-30.6048581168273*
127.407	-0.224031	-6.15544	-10.3368	-15.5035	-21.0611	-24.9308		129.277	-0.407618	-4.96741	-10.1075	-15.7755	-20.402	-25.2795	-30.8712220557309*
127.607	-0.0359682	-6.13484	-10.2511	-15.5096	-21.0855	-25.3493		129.477	0.487522	-4.8469	-9.38527	-15.2376	-18.7611	-24.3246	-28.5810724544187*
127.806	-0.316065	-5.62051	-10.5483	-15.5424	-21.0249	-25.5528		129.676	0.143317	-5.18609	-9.26102	-15.4687	-19.2729	-24.8871	-28.5363490654076*
128.006	-0.318738	-5.54556	-10.2315	-15.4388	-21.1012	-25.3099		129.876	-0.138309	-5.38866	-9.36609	-15.5405	-19.4613	-24.7309	-29.6258185908402*
128.206	0.145468	-6.00081	-10.3753	-15.4144	-21.1784	-25.6043		130.076	-0.148179	-5.48102	-9.32642	-15.5974	-19.7888	-24.911	-29.9373465479828*
128.406	-0.155612	-5.56353	-10.6515	-15.338	-21.1716	-25.4133		130.276	0.14477	-5.7089	-8.85779	-15.2174	-19.3476	-23.8816	-28.4565561476269*
128.606	-0.244836	-5.72902	-10.796	-15.4633	-21.0819	-24.9991		130.476	1.32559	-5.42775	-7.83107	-13.2261	-18.7151	-20.4648	-27.7184007558319*
128.806	-0.198957	-5.55525	-10.4362	-15.2192	-21.1315	-24.6376		130.676	1.76557	-5.4457	-8.10615	-13.7964	-19.427	-21.6698	-27.7709530804827*
129.005	-0.258467	-5.27003	-10.4803	-15.0939	-21.0842	-25.8742		130.875	1.91999	-5.57529	-8.31177	-14.2698	-18.3382	-21.5902	-28.5486099932853*
129.205	-0.261365	-5.40631	-10.5725	-15.2943	-21.1322	-25.1683		131.075	1.94367	-6.04328	-8.3765	-14.6688	-19.7566	-22.4492	-28.7851148997592*
129.405	-0.216436	-5.32642	-10.6073	-15.2543	-21.1284	-25.5024		131.275	1.38523	-5.99763	-8.50061	-14.5192	-19.1236	-22.9966	-28.6119756330159*
129.605	-0.507906	-5.58157	-10.8305	-15.5203	-21.0371	-24.8502		131.475	1.29663	-5.65281	-8.53273	-14.572	-20.2278	-22.8647	-28.9087421698775*
129.805	-0.128631	-5.63354	-10.1673	-15.2419	-21.1389	-25.5218		131.675	1.81607	-4.90771	-8.97371	-14.6732	-18.9646	-23.9362	-28.911728596217*
130.005	-0.163278	-5.87481	-10.4667	-15.2517	-21.1796	-25.4059		131.875	1.81807	-4.99687	-8.97026	-14.6932	-19.2079	-24.1304	-29.6632390973778*
130.204	-0.279634	-5.925	-10.4316	-15.4279	-21.2079	-25.233		132.075	1.0748	-4.85488	-9.05602	-14.3003	-21.0819	-24.0573	-29.2977647405793*
130.404	-0.270998	-4.84113	-10.91	-15.1476	-21.1109	-24.9606		132.274	1.19141	-4.96839	-8.87538	-14.693	-20.423	-24.2705	-29.0537179192593*
130.604	-0.317211	-5.55506	-10.4413	-15.2515	-21.1219	-25.2323		132.474	0.924983	-5.22553	-8.80146	-14.6775	-20.4773	-24.2481	-29.6513386512415*
130.804	-0.246336	-6.17451	-10.9741	-15.2626	-21.0614	-25.3775		132.674	1.15943	-4.77642	-9.02756	-14.7801	-20.1282	-24.97	-29.4914214453979*
131.004	-0.25461	-5.07173	-10.722	-15.2588	-21.0729	-25.0608		132.874	0.933667	-5.02942	-8.98707	-14.8859	-20.3495	-25.0244	-29.5412029504543*
131.204	-0.178319	-5.81593	-10.6246	-15.351	-21.1822	-25.1807		133.074	0.862436	-4.84211	-9.09655	-14.9121	-20.1723	-24.7476	-29.9515031776978*
131.404	-0.231755	-5.71077	-10.7357	-15.1991	-21.1251	-25.1757		133.274	0.857649	-4.89933	-9.16808	-15.1248	-19.8636	-25.0931	-29.5738409900764*
131.603	-0.315626	-5.63604	-11.0038	-15.2825	-21.1217	-25.3872		133.473	0.902589	-4.92797	-9.26938	-15.1266	-19.7649	-25.228	-30.3050307829452*
131.803	-0.223887	-5.48631	-10.4427	-15.4307	-21.127	-25.4947		133.673	0.679928	-5.21104	-9.09557	-15.2602	-20.5161	-25.4564	-29.8907203384729*
132.003	-0.302459	-5.3654	-10.7734	-15.3491	-21.2394	-25.6169		133.873	0.648655	-5.15316	-9.22683	-15.2758	-19.8254	-25.3324	-29.7280430251421*
132.203	-0.658092	-5.56698	-10.9243	-15.6425	-21.0527	-24.7601		134.073	0.777057	-4.98893	-9.34942	-15.3876	-18.8137	-25.7157	-30.2241134350508*
132.403	-0.456915	-5.06118	-10.9237	-15.3916	-21.0271	-25.2248		134.273	0.324545	-5.35455	-9.20403	-15.2078	-20.595	-25.0743	-29.9499651146862*
132.603	-0.412686	-5.44698	-10.6799	-15.3504	-21.16	-25.4073		134.473	0.837685	-4.55035	-9.65598	-15.0945	-19.4113	-25.4969	-29.5598765869657*
132.802	-0.396764	-5.43548	-10.7581	-15.4544	-21.1403	-25.3633		134.672	0.929407	-4.57788	-9.8161	-14.9678	-20.1256	-25.2678	-30.2159231079365*
133.002	-0.414237	-5.32398	-10.5009	-15.4219	-21.1475	-25.0461		134.872	0.69821	-4.6528	-9.74086	-14.9959	-19.746	-25.783	-29.6433616565396*
133.202	-0.237794	-5.39602	-10.6671	-15.3871	-21.1913	-25.7191		135.072	0.93772	-4.56945	-9.70825	-15.1324	-19.9453	-25.477	-29.227520608867*
133.402	-0.223083	-5.58314	-10.4468	-15.4418	-21.1132	-25.6388		135.272	0.661108	-4.65475	-9.75561	-15.2547	-19.768	-25.6104	-29.5931750928196*
133.602	-0.146497	-5.49491	-10.1405	-15.5549	-21.1213	-25.7914		135.472	0.52686	-4.68753	-9.99219	-15.1753	-19.9565	-25.6513	-29.4780492785364*
133.802	-0.448989	-5.77093	-10.6397	-15.3907	-21.1003	-25.5085		135.672	0.705094	-4.77814	-10.0314	-15.3618	-20.2578	-26.0675	-28.7906826937747*
134.001	-0.265798	-5.67178	-10.5433	-15.5843	-21.195	-25.2922		135.871	0.511839	-4.79903	-10.0107	-15.1331	-20.0788	-25.151	-29.3503852952128*
134.201	-0.347773	-5.03569	-10.5819	-15.3558	-21.2072	-26.0655		136.071	0.039312	-4.9311	-9.96486	-15.0437	-21.1085	-25.5631	-29.3814849761599*
134.401	-0.2379	-5.64357	-10.4542	-15.5011	-21.1428	-25.2791		136.271	0.0646497	-5.06551	-9.97431	-15.0333	-20.6377	-25.9	-28.9176539153414*
134.601	-0.220825	-5.49327	-10.4592	-15.4662	-21.1021	-25.193		136.471	-0.110426	-5.41188	-9.87228	-14.9744	-20.9555	-25.8597	-28.2357339026594*
134.801	-0.210805	-5.4595	-10.1783	-15.3515	-21.1496	-25.3841		136.671	1.11993	-4.70312	-8.84529	-14.3988	-19.1657	-24.8672	-24.8353291940076*
135.001	-0.317438	-5.19813	-10.2715	-15.4737	-21.1394	-25.4196		136.871	1.7026	-4.74737	-8.38996	-13.9331	-18.4692	-23.1777	-26.2022736835811*
135.201	-0.427382	-5.33503	-10.2246	-15.4129	-21.1022	-25.6164		137.071	1.37869	-4.80597	-8.47191	-14.1439	-19.7406	-23.8059	-25.5474386996685*
135.4	-0.130744	-5.07773	-10.6678	-15.0981	-21.2102	-25.4663		137.27	1.09377	-5.07527	-8.48761	-14.433	-19.7731	-24.5493	-25.589557067943*
135.6	-0.125813	-5.1638	-10.2188	-15.2322	-21.1537	-24.9794		137.47	1.88598	-4.26817	-8.74615	-14.4154	-18.8941	-24.2379	-25.7384257927002*
135.8	-0.271424	-5.0314	-10.366	-15.2955	-21.1579	-25.5044		137.67	1.73047	-4.43409	-8.94463	-14.4473	-19.2717	-24.6684	-26.8190954698404*
136	-0.12386	-5.84996	-10.219	-15.3833	-21.0827	-25.1805		137.87	1.56139	-4.7398	-8.93374	-14.5835	-18.8913	-24.6598	-27.7847348546732*
136.2	-0.00246364	-5.77139	-10.1297	-15.4664	-21.2562	-24.7154		138.07	1.19288	-4.97312	-8.81694	-14.5759	-19.4854	-24.8642	-27.472524916111*
136.399	-0.136547	-5.10556	-10.3834	-15.308	-21.1723	-25.5245		138.269	1.17084	-4.75212	-9.13589	-14.814	-19.3843	-25.0692	-28.2219268833753*
136.599	-0.100477	-4.29726	-10.4831	-15.0729	-21.024	-24.9045		138.469	1.26682	-4.65023	-9.09423	-14.7476	-19.1436	-25.1218	-28.5245834872037*
136.799	-0.333028	-3.9614	-10.2702	-15.1968	-21.0133	-25.7461		138.669	0.882419	-4.99616	-9.03044	-14.6946	-19.7825	-25.1056	-29.0997686088658*
136.999	-0.138278	-5.51233	-9.84783	-15.1959	-21.2189	-25.7169		138.869	1.00741	-4.74831	-9.37041	-14.6408	-20.0382	-25.0059	-28.8334458353851*
137.199	-0.267894	-5.26442	-10.1228	-15.3338	-21.1515	-25.0142		139.069	1.14202	-4.76136	-9.4864	-14.717	-19.8146	-25.296	-29.0748505643445*
137.399	-0.0266471	-5.54125	-10.2237	-15.2035	-21.0931	-24.8998		139.269	1.07607	-4.98874	-9.52332	-14.9301	-19.8871	-25.491	-29.1509360923027*
137.599	-0.403153	-6.02991	-10.3926	-15.2726	-21.0307	-25.3219		139.469	0.885305	-4.98416	-9.61317	-14.9445	-19.5567	-25.7308	-29.1495282803278*
137.798	-0.342666	-5.53978	-10.6057	-15.54	-21.216	-25.1422		139.668	0.716951	-5.14856	-9.48013	-14.9262	-19.4831	-25.3586	-29.6830312507377*
137.998	-0.253841	-4.98881	-10.1282	-15.2633	-21.274	-25.5855		139.868	0.374281	-5.51632	-9.45472	-14.9304	-20.1395	-25.4008	-29.4810814189643*
138.198	-0.324566	-5.54066	-9.91167	-15.2906	-21.2548	-25.7786		140.068	0.412686	-5.34693	-9.54783	-14.9769	-19.7582	-25.3985	-29.4796626901923*
138.398	-0.128864	-5.51576	-9.81632	-15.3311	-21.1387	-25.7497		140.268	0.427119	-5.10835	-9.5216	-14.974	-20.3853	-25.2718	-29.9900860229274*
138.598	-0.15671	-5.53584	-10.1427	-15.2464	-21.2115	-25.6846		140.468	0.569794	-5.2044	-9.22659	-15.1258	-19.753	-25.6393	-30.0162425667216*
138.798	-0.221953	-6.0956	-10.5158	-15.3124	-21.1121	-25.1819		140.668	0.48104	-5.375	-9.30342	-15.035	-19.9015	-25.3232	-30.0133928778159*
138.997	-0.190774	-5.17849	-10.6244	-15.2846	-21.2354	-26.0527		140.867	0.34153	-5.31579	-9.01176	-15.2517	-19.83	-25.6025	-30.0498380026368*
139.197	0.609054	-2.58113	-9.14741	-14.5472	-20.2725	-23.0086		141.067	0.546073	-5.37148	-9.03996	-14.8974	-20.2071	-25.1845	-29.8271219435282*
139.397	0.364206	-2.33704	-9.42488	-13.498	-19.6097	-21.7221		141.267	0.745975	-5.17286	-8.84145	-14.379	-20.2182	-24.4592	-29.6861373069801*
139.597	0.0482247	-3.24679	-9.45649	-13.4442	-20.1081	-22.2456		141.467	0.748449	-5.18619	-8.74788	-14.4839	-20.4094	-24.3916	-29.569851355559*
139.797	-0.0527519	-3.74543	-9.33548	-13.3191	-20.4008	-23.0378		141.667	0.693499	-4.97006	-8.75668	-14.6687	-20.7919	-24.5295	-29.5930270337573*
139.997	-0.243273	-4.10919	-9.42642	-13.4029	-20.4681	-23.4393		141.867	0.613004	-5.04485	-8.73727	-14.665	-20.6658	-25.0137	-30.0763080063429*
140.196	-0.232278	-4.24288	-9.33218	-13.3782	-20.5709	-23.407		142.066	0.738451	-4.98976	-8.95573	-14.7971	-20.7222	-25.1075	-30.4203951747342*
140.396	-0.110059	-4.71344	-9.13737	-13.5798	-20.6876	-23.6643		142.266	0.672273	-4.86763	-8.96739	-14.8564	-20.2729	-25.1603	-30.0959139600802*
140.596	0.401372	-1.41015	-9.16293	-12.2739	-19.448	-21.5752		142.466	0.485173	-4.9323	-9.04211	-14.9024	-20.5911	-24.9521	-30.5426662602312*
140.796	0.274434	-3.00668	-8.95205	-12.3855	-19.8578	-22.0405		142.666	0.455243	-4.97178	-9.07279	-14.7137	-20.9966	-25.0182	-30.8700453159639*
140.996	0.21824	-2.87146	-9.55808	-12.4998	-20.0631	-22.5497		142.866	0.59499	-5.0274	-9.05387	-14.9301	-20.8449	-25.2853	-30.7911621312849*
141.196	0.114684	-3.95987	-9.07021	-12.598	-20.0809	-22.9684		143.066	0.501705	-4.87227	-8.9887	-14.9114	-19.752	-25.4813	-30.6478896297026*
141.395	-0.0424776	-3.35023	-8.88485	-12.8735	-20.1191	-23.3215		143.266	0.533116	-4.9355	-9.10454	-14.8726	-20.6908	-25.144	-30.5555503552836*
141.595	0.0838063	-4.70709	-8.78717	-13.0193	-20.2637	-23.4499		143.465	1.13808	-4.3123	-8.20767	-14.3666	-17.8425	-23.3633	-29.1520855400766*
141.795	-0.0490092	-4.80965	-8.92556	-12.9227	-20.3474	-24.0297		143.665	1.31065	-3.93461	-8.22718	-14.2371	-17.7031	-24.135	-26.7870205550083*
141.995	0.0513525	-4.79057	-9.19398	-13.3262	-20.2968	-23.7036		143.865	1.07942	-4.21279	-8.13265	-14.4956	-18.2648	-24.4322	-28.0333253379695*
142.195	-0.163728	-4.99866	-9.53298	-13.1598	-20.3935	-24.4042		144.065	0.988095	-4.33169	-8.14385	-14.5435	-20.0233	-24.0931	-27.7124920393365*
142.395	-0.211487	-5.27085	-9.60383	-13.4201	-20.4649	-24.6685		144.265	0.854756	-4.38813	-8.28959	-14.7129	-19.9691	-25.0173	-29.0638948760344*
142.595	-0.166382	-5.63933	-9.50589	-13.4769	-20.3341	-24.212		144.465	0.805453	-4.49155	-8.3534	-14.7192	-19.3314	-25.0016	-28.6478004676931*
142.794	-0.316971	-5.50119	-9.67517	-13.769	-20.259	-24.3768		144.664	0.66477	-4.51933	-8.43008	-14.6967	-20.3557	-24.9545	-29.0609616690814*
142.994	-0.11301	-5.18818	-9.51909	-13.6957	-20.429	-25.1755		144.864	0.57958	-4.61888	-8.48532	-14.7934	-19.9449	-25.5486	-29.2464194043211*
143.194	-0.206421	-4.99876	-9.8255	-13.7275	-20.362	-25.2749		145.064	0.664361	-4.43137	-8.65234	-14.7409	-20.4283	-25.4149	-29.3815804981356*
143.394	-0.242698	-5.54579	-10.0854	-13.9318	-20.3477	-24.8604		145.264	0.585134	-4.45973	-8.46965	-14.7124	-21.1357	-24.1221	-29.3007043156641*
143.594	-0.550556	-4.32459	-10.3425	-14.1427	-20.2501	-25.1082		145.464	0.625034	-4.48771	-8.6569	-14.8586	-21.0894	-24.9381	-29.8344127265516*
143.794	-0.624998	-4.53301	-10.0443	-14.1791	-20.2892	-25.4509		145.664	0.549913	-4.51691	-8.98683	-14.958	-20.503	-25.5147	-29.3966365809682*
143.993	-0.146519	-5.27119	-9.48564	-14.2048	-20.4037	-25.1609		145.863	0.419091	-4.61662	-9.06923	-15.0722	-20.0891	-25.4564	-29.9865721538045*
144.193	0.207722	-5.97275	-8.85968	-14.1936	-20.5937	-25.3472		146.063	0.406847	-4.56983	-8.96947	-15.1089	-20.4565	-25.3742	-29.2548585434387*
144.393	0.0820791	-6.08598	-9.11787	-14.1649	-20.4697	-25.4555		146.263	0.267501	-4.66081	-9.11634	-14.9848	-20.7865	-25.2895	-29.2890499523319*
144.593	-0.300061	-5.579	-9.29149	-14.1835	-20.3697	-25.4874		146.463	0.976176	-4.62424	-8.98178	-14.2709	-19.3594	-24.0414	-28.495055597623*
144.793	-0.493837	-4.40165	-10.0174	-14.4258	-20.4653	-25.2197		146.663	0.877346	-4.75598	-9.0839	-14.2068	-20.3707	-24.5607	-28.9414134147577*
144.993	-0.325512	-5.18545	-10.3784	-14.5104	-20.4853	-25.0227		146.863	1.16393	-4.63599	-9.49618	-14.3974	-19.6996	-24.5641	-29.0336946936916*
145.192	-0.501536	-5.01734	-10.4313	-14.4661	-20.5968	-25.1316		147.062	0.68028	-4.77286	-9.10457	-14.4635	-20.3174	-24.9136	-29.4259311240084*
145.392	-0.216411	-5.47208	-10.6307	-14.4225	-20.5829	-25.2307		147.262	0.489966	-4.89753	-9.18044	-14.4767	-20.3846	-24.8472	-28.9133674803996*
145.592	-0.67182	-4.61997	-10.5212	-14.6703	-20.5211	-24.992		147.462	0.616275	-4.79439	-8.95234	-14.6936	-19.8848	-24.9551	-28.697921758063*
145.792	-0.479065	-5.0385	-10.5047	-14.7983	-20.7161	-24.7284		147.662	1.17572	-4.84317	-7.70523	-13.7671	-16.3369	-23.2342	-26.7758171918613*
145.992	-0.244422	-6.03587	-9.71636	-14.6347	-20.7907	-25.0682		147.862	1.68066	-4.74644	-7.61304	-14.0807	-17.2336	-23.5828	-26.579728770462*
146.192	-0.354795	-5.1552	-10.192	-14.6891	-20.7085	-25.2599		148.062	1.36853	-5.122	-7.56233	-14.2777	-17.7438	-23.5564	-27.2045175443592*
146.392	-0.358068	-5.79314	-10.2634	-14.685	-20.7132	-25.455		148.262	1.54559	-4.87778	-7.9853	-14.5001	-17.9029	-24.2644	-27.9771656941372*
146.591	-0.437239	-5.41424	-10.5396	-14.9584	-20.6989	-25.0472		148.461	1.45015	-4.60775	-8.11677	-14.344	-18.2504	-24.913	-27.3438977528659*
146.791	-0.59108	-5.48716	-10.4822	-14.9566	-20.6638	-25.378		148.661	1.33678	-4.5705	-8.2956	-14.3751	-18.5667	-24.8391	-27.8448595702291*
146.991	-0.452364	-5.18645	-10.5765	-15.0938	-20.847	-25.2324		148.861	1.00368	-4.68893	-8.40917	-14.4212	-19.4571	-24.5023	-28.7453884472422*
147.191	-0.64073	-5.29305	-10.8904	-14.9281	-20.6918	-24.9538		149.061	0.987458	-4.80548	-8.48627	-14.502	-18.9612	-24.606	-28.8383936462918*
147.391	-0.528238	-5.19755	-10.0301	-14.9182	-20.8038	-25.1		149.261	1.09384	-4.77089	-8.43056	-14.6112	-19.3062	-24.772	-28.6709413486002*
147.591	-0.740017	-5.22583	-10.6889	-15.168	-20.7336	-25.0306		149.461	0.885144	-4.6703	-8.38718	-14.7283	-19.71	-25.1015	-28.9416199241718*
147.79	-0.828218	-4.56023	-10.6187	-15.251	-20.6201	-25.4685		149.66	2.0712	-3.86277	-7.42279	-13.4684	-14.2812	-22.6229	-27.5223191574308*
147.99	-0.7452	-5.0393	-10.8385	-15.2546	-20.7027	-25.1666		149.86	3.29823	-3.82462	-7.60647	-12.3938	-14.9212	-19.2067	-27.6745470716659*
148.19	-0.571611	-5.30526	-10.4751	-15.0584	-20.79	-25.3327		150.06	3.26092	-3.78001	-7.97553	-12.5244	-16.4186	-20.7675	-28.2486391490064*
148.39	-0.559918	-4.96122	-10.6899	-15.1244	-20.6994	-25.1921		150.26	2.53964	-4.79288	-7.56942	-12.5474	-17.8921	-21.2812	-27.6089939786924*
148.59	-0.720308	-5.37651	-10.3617	-14.9934	-20.6778	-25.7797		150.46	2.58617	-5.19945	-7.44432	-12.99	-18.446	-21.4007	-28.5440169782883*
148.79	-0.614826	-5.16628	-10.438	-15.1051	-20.6611	-25.1313		150.66	2.92213	-5.02367	-7.72786	-13.2905	-18.0763	-22.5556	-28.7868276997564*
148.989	-1.11525	-4.02434	-11.6034	-15.3783	-20.6184	-25.3441		150.859	2.62751	-4.88779	-7.6961	-13.0117	-17.426	-22.594	-28.5361600683557*
149.189	-0.85584	-3.16834	-11.5993	-15.123	-20.5413	-24.7938		151.059	2.48542	-4.60689	-7.59124	-13.0981	-18.512	-23.0715	-28.7104758474328*
149.389	-1.34047	-3.77622	-11.501	-15.5096	-20.5093	-24.7297		151.259	1.62029	-5.1727	-7.56658	-12.9614	-18.8741	-23.2329	-29.1054216903596*
149.589	-1.00973	-4.161	-11.5441	-15.4523	-20.5339	-25.3744		151.459	1.80636	-5.0732	-7.37811	-13.0597	-19.6644	-23.607	-29.6527223552892*
149.789	-0.846598	-4.90112	-10.6846	-15.3487	-20.6043	-25.1659		151.659	1.21642	-5.07427	-7.28369	-13.0481	-19.6703	-22.9567	-29.6565423245831*
149.989	-0.665039	-4.40658	-10.549	-15.5104	-20.8005	-24.9069		151.859	2.81349	-4.14828	-6.36733	-11.9367	-16.6012	-21.5289	-27.7074384719568*
150.189	0.0547513	-5.68172	-9.65321	-15.213	-21.206	-25.6847		152.059	3.67156	-4.02161	-6.43139	-12.5237	-15.5365	-22.4437	-27.8834047343135*
150.388	-0.765363	-5.4625	-11.092	-15.2665	-20.874	-25.2739		152.258	3.09489	-3.86844	-6.64462	-12.6279	-16.9652	-22.3373	-27.8715192987735*
150.588	-1.02561	-4.21818	-11.3391	-15.2568	-20.621	-25.038		152.458	3.05547	-4.00842	-6.59482	-12.7677	-16.8763	-23.1639	-28.4154980732823*
150.788	-0.995081	-1.24369	-11.1602	-14.3325	-19.8879	-23.2792		152.658	2.95434	-4.10942	-6.83051	-12.9151	-17.5662	-23.8316	-28.7424072518681*
150.988	-0.519331	-2.89718	-10.6569	-14.3017	-20.1214	-23.23		152.858	2.70946	-4.05593	-7.06892	-12.9597	-17.7408	-23.6765	-28.5705600335624*
151.188	-0.593574	-3.96824	-11.1583	-14.2293	-20.3318	-23.9205		153.058	2.73732	-4.2432	-7.17328	-13.0934	-18.5013	-23.641	-28.9556241281056*
151.387	-0.273504	-4.12316	-9.47422	-14.2104	-20.5392	-24.1698		153.257	3.10509	-3.63913	-7.35519	-13.1998	-18.0914	-24.7695	-29.113183533183*
151.587	-0.72826	-4.15638	-9.95295	-14.5143	-20.4272	-24.2689		153.457	2.63971	-3.97293	-7.58198	-13.0773	-17.9744	-24.5544	-29.723568048015*
151.787	-0.626164	-4.53951	-9.84495	-14.4479	-20.4382	-23.7671		153.657	2.50831	-3.94247	-7.79062	-12.9552	-18.914	-24.7732	-29.5798982205006*
151.987	-0.467401	-4.10231	-9.89168	-14.4016	-20.496	-23.7962		153.857	2.24207	-3.91895	-7.86394	-13.2415	-18.691	-24.7945	-29.3884457989873*
152.187	-0.0981518	-5.2797	-9.48038	-14.1851	-20.5838	-24.4589		154.057	1.99399	-4.24967	-8.00698	-13.3677	-18.7999	-25.1448	-29.9404983183136*
152.387	-0.57254	-4.42107	-9.7042	-14.5081	-20.3249	-24.311		154.257	2.09084	-3.86632	-8.22995	-13.3233	-19.3098	-25.2705	-29.3448516161886*
152.587	-0.386641	-4.55505	-9.67814	-14.477	-20.3783	-24.9203		154.457	2.05257	-4.07308	-8.4181	-13.5551	-19.4533	-25.1437	-29.3839867421895*
152.786	-0.992768	-4.03175	-9.95132	-14.7985	-20.2216	-24.1733		154.656	2.04295	-3.99391	-8.4803	-13.4799	-19.7404	-25.2968	-29.9766454714287*
152.986	-0.865933	-4.37233	-9.93192	-14.7514	-20.3107	-24.7947		154.856	1.72966	-4.11421	-8.54086	-13.5694	-19.5526	-25.833	-29.4540452883491*
153.186	0.0812095	-5.65972	-9.01348	-14.4247	-20.827	-24.627		155.056	1.21987	-4.0105	-8.66655	-13.5849	-20.2038	-25.3414	-30.1184024258935*
153.386	-0.354686	-5.49157	-8.9057	-14.5547	-20.81	-25.0467		155.256	1.42903	-4.07787	-8.46946	-13.3114	-19.2178	-25.0067	-29.9169651832363*
153.586	-0.329874	-5.18406	-9.37735	-14.8379	-20.7856	-25.2156		155.456	2.80051	-3.41052	-8.30616	-12.6959	-16.9287	-23.2493	-28.1465912029263*
153.786	-0.440225	-4.84493	-9.78466	-14.7875	-20.5859	-24.7889		155.656	2.41501	-3.62457	-8.17244	-12.7546	-17.9803	-24.034	-28.1718347044647*
153.985	-0.507749	-4.76472	-9.58499	-14.8162	-20.6385	-25.336		155.855	2.23484	-3.74237	-8.2689	-12.9934	-18.537	-23.9255	-28.5028190324793*
154.185	-0.667724	-4.56318	-9.29757	-14.9684	-20.7093	-25.1744		156.055	2.22817	-3.74177	-8.41887	-13.1477	-18.0662	-24.6995	-29.1930594641093*
154.385	-0.658132	-4.70506	-9.88807	-14.9969	-20.7773	-24.9876		156.255	2.13307	-3.83548	-8.45817	-13.2945	-19.2255	-24.496	-28.8880762178734*
154.585	-0.457441	-4.33002	-9.77917	-14.7942	-20.5528	-24.8931		156.455	2.61431	-3.43768	-8.10372	-12.7304	-17.12	-23.7382	-27.7235976061752*
154.785	-0.412461	-3.40585	-9.73721	-14.5933	-20.2475	-24.5882		156.655	4.38766	-1.89225	-6.72281	-11.2055	-12.4786	-19.9049	-25.8881610382367*
154.985	-0.28451	-4.28685	-9.38201	-14.5488	-20.496	-24.8628		156.855	4.97164	-1.23275	-6.84489	-11.1556	-12.6708	-20.3009	-26.8515956848976*
155.185	-0.40897	-4.52685	-9.93961	-14.6518	-20.4508	-24.8132		157.054	4.92984	-1.33836	-6.98993	-11.508	-13.3027	-21.8395	-26.5321156142533*
155.384	-0.284434	-4.84405	-9.68785	-14.7408	-20.6933	-24.8767		157.254	4.63537	-1.50795	-7.15111	-11.7466	-13.823	-22.2144	-28.3819268749313*
155.584	-0.439917	-5.02208	-9.92028	-14.6472	-20.5315	-25.7329		157.454	4.11258	-1.59217	-7.47111	-11.7338	-15.2476	-21.9464	-27.9565170270621*
155.784	-0.475707	-5.06075	-10.3797	-14.8717	-20.5732	-24.8482		157.654	3.82818	-2.00083	-7.42917	-11.8385	-15.6066	-22.8615	-28.2655535891324*
155.984	-0.458578	-4.66864	-9.77682	-15.019	-20.4321	-25.215		157.854	3.79933	-1.90587	-7.61928	-11.7244	-16.7346	-23.1998	-28.7061007135136*
156.184	-0.584771	-4.76749	-10.0851	-15.0357	-20.3858	-24.8565		158.054	3.46545	-2.11723	-7.89606	-12.0485	-17.2712	-23.8795	-28.7027108205435*
156.383	-0.577713	-5.34906	-9.90248	-15.2049	-20.3483	-24.8642		158.254	2.72572	-2.80128	-7.92204	-11.9758	-18.3605	-23.743	-29.0425723241642*
156.583	-0.584622	-4.89417	-9.64026	-15.3112	-20.6162	-25.081		158.453	2.59398	-2.93188	-7.86144	-12.1766	-19.017	-23.9253	-29.5036423450192*
156.783	-0.344691	-5.05872	-9.63495	-15.1836	-20.6473	-25.5203		158.653	2.36915	-2.87905	-7.85087	-12.2552	-19.4661	-24.2385	-29.5558958223461*
156.983	-0.614222	-5.1233	-9.25496	-15.1972	-20.6858	-25.5085		158.853	2.79733	-2.71492	-8.14851	-12.5538	-18.376	-24.8049	-29.7360541348354*
157.183	-0.523242	-5.63467	-9.51045	-15.3194	-20.7352	-25.1501		159.053	2.35995	-2.79399	-8.24466	-12.4695	-19.2449	-24.3071	-30.2483482700127*
157.383	-0.674537	-4.48959	-9.48014	-15.1363	-20.6924	-25.4468		159.253	2.37534	-2.50162	-8.40613	-12.4599	-18.9641	-24.7014	-30.2149581085489*
157.583	-0.806162	-5.0097	-9.95459	-15.3587	-20.7295	-25.2883		159.453	2.12793	-3.01449	-8.52085	-12.6126	-19.5208	-25.1365	-30.1409159321104*
157.782	-0.425653	-5.25	-9.62366	-15.2041	-20.7365	-24.9889		159.652	2.01194	-3.07528	-8.6158	-12.9027	-19.8175	-25.1788	-30.117052131794*
157.982	-0.50161	-4.92128	-9.80114	-15.144	-20.8032	-25.1969		159.852	1.45053	-3.53524	-8.52058	-12.7879	-20.2574	-24.9103	-30.6583242683788*
158.182	-0.263726	-5.68375	-9.58658	-15.2742	-20.4963	-25.1974		160.052	1.2799	-3.33325	-8.69448	-12.9104	-19.7221	-25.0922	-30.6509936390455*
158.382	-0.48858	-5.08799	-9.56125	-15.0552	-20.4765	-25.3105		160.252	1.69103	-3.58387	-8.75175	-13.1171	-19.3077	-25.2092	-31.0005583559287*
158.582	-0.472311	-5.34308	-10.0531	-15.2742	-20.5879	-25.3947		160.452	1.44458	-3.57564	-8.96093	-13.1114	-19.8476	-25.5194	-30.7645096806053*
158.782	-0.573318	-4.97183	-9.64747	-15.2718	-20.3848	-25.0145		160.652	1.55713	-3.61684	-9.00124	-13.2424	-19.2226	-25.3929	-31.0275201158629*
158.981	-0.530113	-5.16342	-10.413	-15.2955	-20.4762	-25.3313		160.851	1.39054	-3.6078	-9.16089	-13.4671	-19.2544	-25.6601	-30.8315522340995*
159.181	-0.836814	-4.83494	-10.3523	-15.3156	-20.5789	-25.4034		161.051	1.75604	-3.46818	-8.84179	-13.0152	-19.0442	-24.99	-30.9284713323857*
159.381	-0.683827	-5.17225	-10.2312	-15.1993	-20.5214	-25.2387		161.251	1.75016	-3.21116	-8.8137	-13.1218	-19.6423	-25.1563	-30.2319621573855*
159.581	-0.742265	-4.46884	-10.3186	-15.0604	-20.5188	-25.2122		161.451	1.84682	-2.98748	-8.99228	-13.1373	-19.6691	-25.1538	-29.5559383523686*
159.781	-0.555257	-4.98387	-10.2119	-15.1338	-20.6073	-25.1065		161.651	1.22279	-3.28905	-8.99339	-12.965	-20.6459	-25.2377	-29.9718113544163*
159.981	-0.313425	-2.76381	-9.76917	-14.5302	-19.8905	-23.6707		161.851	1.48293	-3.09058	-9.15751	-13.5352	-20.5447	-25.8825	-29.9532565745347*
160.18	0.775115	-0.125918	-8.43441	-13.0958	-18.7765	-21.181		162.05	0.86296	-3.37494	-8.88358	-13.1952	-20.437	-25.0191	-30.5077429710577*
160.38	0.571146	1.0001	-7.63286	-11.7498	-17.0543	-18.5367		162.25	1.03078	-3.42854	-9.09919	-13.4912	-20.3014	-25.2089	-30.3310002514987*
160.58	0.766178	0.969043	-5.97622	-10.7038	-15.9162	-17.5311		162.45	1.35893	-3.10732	-9.47174	-13.6242	-19.4248	-25.6046	-30.3823790204484*
160.78	0.400081	-0.709127	-6.15662	-10.7801	-16.535	-18.1855		162.65	1.25479	-3.1413	-9.52751	-13.566	-19.2551	-25.7839	-29.9227080099005*
160.98	0.308955	-2.03089	-5.80087	-10.9872	-16.9502	-19.7092		162.85	1.04283	-3.25476	-9.69179	-13.7926	-19.4125	-25.6909	-30.6283874537689*
161.18	0.375667	-2.91482	-5.91113	-11.2978	-17.4126	-20.2871		163.05	0.828978	-3.75723	-9.40929	-13.9542	-20.9418	-25.5357	-30.148712503995*
161.38	0.224498	-3.20276	-6.41016	-11.4228	-17.516	-20.9359		163.25	0.63179	-3.67448	-9.53691	-13.8425	-20.1271	-25.5946	-30.7854649277357*
161.579	-0.0413757	-3.99272	-6.40423	-11.6543	-17.5627	-21.6123		163.449	0.187768	-4.04873	-9.48726	-13.7962	-20.4345	-25.3492	-30.5585113090962*
161.779	0.0520732	-4.58539	-6.17546	-11.7346	-17.6742	-22.8521		163.649	0.882451	-3.05957	-9.80007	-14.019	-19.7321	-25.8429	-30.25845108354*
161.979	0.326637	-4.68174	-6.54523	-11.6782	-17.8016	-22.5684		163.849	0.979226	-3.09436	-9.90947	-13.9218	-20.0358	-25.8923	-30.2233194199997*
162.179	0.366808	-4.72203	-6.39892	-11.767	-18.1552	-22.5015		164.049	0.662927	-3.51238	-9.90747	-14.0996	-20.2735	-25.7722	-30.4175292880307*
162.379	0.0854991	-4.81575	-7.36997	-12.0808	-18.0189	-23.944		164.249	0.66031	-3.56888	-10.0648	-14.1556	-19.2066	-25.5395	-30.6606743364137*
162.579	0.0354281	-4.6125	-7.36368	-12.4152	-17.9584	-23.8654		164.449	0.55159	-3.76027	-10.0633	-14.2716	-19.8646	-25.8939	-30.6313372633511*
162.778	-0.0518807	-4.7588	-7.52223	-12.5067	-18.1209	-24.0002		164.648	0.534285	-3.30204	-10.1377	-14.2746	-18.8308	-25.741	-30.3886181974929*
162.978	-0.256845	-5.36915	-8.13137	-12.7592	-18.1993	-24.005		164.848	0.309378	-2.66063	-10.0345	-14.4284	-20.4147	-25.3713	-30.7122275466856*
163.178	-0.293747	-5.19697	-7.84906	-12.9825	-18.2215	-24.3095		165.048	0.554258	-1.90196	-10.0484	-14.479	-19.5282	-25.4849	-31.5832135235219*
163.378	-0.379352	-5.47594	-8.39089	-12.8384	-18.3147	-24.3478		165.248	0.465901	-1.17204	-10.2993	-14.42	-19.5164	-25.7133	-31.0341195472157*
163.578	-0.143585	-5.3538	-8.74045	-13.0646	-18.474	-24.2095		165.448	0.168849	-1.07884	-10.2749	-14.5489	-20.4473	-25.6067	-30.0229250953702*
163.778	-0.216313	-5.16757	-8.51669	-13.1127	-18.5061	-24.3682		165.648	0.13693	-1.19689	-9.95355	-14.4373	-19.7535	-25.2186	-29.7579689229548*
163.977	-0.427157	-5.55872	-8.90153	-13.078	-18.5174	-24.6135		165.847	0.347173	-0.752476	-10.1188	-14.1973	-19.4992	-24.9782	-29.3009210595756*
164.177	-0.221975	-2.55503	-7.95591	-12.0899	-17.9473	-23.1052		166.047	0.600001	-0.537731	-10.1102	-14.1874	-19.419	-25.4774	-28.1169468675086*
164.377	-0.333016	-3.58159	-8.21016	-12.0894	-18.1552	-22.7419		166.247	0.618519	-0.743744	-10.0126	-14.4508	-19.3352	-25.3682	-29.0378207881742*
164.577	0.0898548	-2.4946	-8.54537	-12.0503	-17.9587	-22.063		166.447	0.380682	-1.18743	-10.0468	-14.5117	-19.9304	-25.0191	-29.3584980675802*
164.777	1.03657	-0.100283	-6.65422	-11.0244	-16.3165	-19.7278		166.647	0.179771	-1.19934	-10.1709	-14.366	-20.5489	-25.4803	-29.0583941748352*
164.977	0.293352	-0.969624	-6.71803	-11.1424	-16.7214	-20.3932		166.847	0.300744	-1.29938	-10.0302	-14.2924	-20.0983	-24.8742	-29.3844318291095*
165.177	0.063695	-2.43436	-7.50909	-11.2792	-16.9056	-21.3571		167.047	2.02198	-1.13918	-9.4559	-12.9091	-18.9135	-21.8711	-26.7274762491713*
165.376	0.102775	-2.66985	-7.58358	-11.3457	-17.0898	-21.3396		167.246	1.95578	-1.19078	-9.32579	-13.0915	-19.3034	-22.8429	-27.3166626181347*
165.576	0.279481	-2.33274	-7.58686	-11.4307	-17.1595	-21.8829		167.446	1.85144	-1.47975	-8.97599	-12.9334	-18.5901	-22.2429	-26.9501925584565*
165.776	-0.132875	-2.95007	-7.75239	-11.556	-17.2553	-22.2682		167.646	2.14225	-1.71953	-8.90084	-12.7604	-17.2548	-21.8698	-26.5311899608224*
165.976	-0.0580184	-3.96364	-7.8626	-11.6312	-17.5711	-22.6127		167.846	2.05923	-1.94981	-8.88933	-13.0381	-18.154	-22.6642	-27.0556124302779*
166.176	-0.284197	-4.61736	-7.76403	-11.8704	-17.4755	-22.5448		168.046	1.78842	-2.23423	-8.89814	-13.1423	-18.7325	-22.6814	-27.6667438359863*
166.375	-0.0736813	-4.68855	-7.14728	-11.8818	-17.7068	-23.7602		168.245	1.84898	-2.11936	-8.95986	-13.1149	-19.8047	-23.377	-27.5969945990813*
166.575	-0.023023	-5.7226	-7.59102	-12.1342	-17.7477	-23.8746		168.445	1.61762	-2.14121	-8.91871	-13.1637	-19.3737	-23.6336	-27.301310872044*
166.775	-0.153323	-5.61324	-7.83532	-12.1011	-17.8623	-24.2672		168.645	1.56391	-2.31707	-8.98046	-13.3476	-19.3994	-23.9738	-27.7660634924945*
166.975	0.0584321	-5.64428	-7.95648	-12.2207	-17.9844	-24.243		168.845	2.20397	-1.69697	-9.4179	-13.4935	-18.9247	-24.8065	-28.1594004724311*
167.175	0.0554849	-5.73698	-8.03687	-12.4769	-18.0353	-24.3197		169.045	1.96673	-1.59409	-9.15262	-13.4636	-18.8962	-24.538	-29.5301908586919*
167.375	-0.0347981	-5.26191	-7.91139	-12.7211	-18.1864	-24.5727		169.245	2.10478	-1.23882	-9.59123	-13.3176	-18.7604	-25.2635	-28.5551737176139*
167.575	0.00807621	-5.82523	-7.75166	-12.7251	-18.2852	-24.8195		169.445	1.9095	-1.65615	-9.61276	-13.4465	-19.5851	-25.3097	-28.7146233206433*
167.774	0.0559859	-5.95694	-8.02242	-12.6546	-18.3329	-25.1913		169.644	1.23356	-1.93819	-9.66592	-13.713	-19.3677	-25.2913	-28.5006272580041*
167.974	-0.0922631	-5.90122	-8.3344	-12.9811	-18.4178	-24.9576		169.844	1.37958	-2.11123	-9.51681	-13.802	-19.9072	-25.31	-29.4742636516671*
168.174	0.0280672	-5.9403	-8.47305	-13.0659	-18.4161	-24.8365		170.044	0.914687	-2.53919	-9.37925	-13.7807	-20.5955	-24.9757	-29.5365992460933*
168.374	-0.117522	-6.01645	-8.52806	-13.2742	-18.54	-25.3235		170.244	1.21593	-2.53885	-9.57692	-14.0188	-20.1195	-25.3646	-28.8304302975863*
168.574	-0.0645721	-6.08713	-8.61233	-13.2537	-18.5883	-25.4965		170.444	0.75345	-2.9044	-9.72522	-14.1311	-20.3143	-25.1237	-29.866669792694*
168.774	0.0782092	-6.04818	-8.97099	-13.4328	-18.6323	-25.3707		170.644	0.892217	-2.68408	-9.79652	-14.0008	-20.2547	-25.2986	-29.7621596084876*
168.973	0.0415	-5.47627	-8.94894	-13.5293	-18.562	-24.8951		170.843	1.18397	-2.05305	-10.1111	-13.9082	-19.7803	-25.4772	-29.9380990337179*
169.173	-0.0370037	-5.22438	-9.18026	-13.6571	-18.6163	-25.8828		171.043	0.975438	-2.42638	-9.98845	-13.8791	-19.4512	-25.8455	-29.6087708748148*
169.373	0.173505	-6.6184	-8.90462	-13.5651	-18.8253	-25.652		171.243	0.950494	-2.77478	-10.0459	-13.9738	-19.2453	-25.4502	-30.011324338061*
169.573	0.0772464	-6.08165	-9.08364	-13.6701	-18.8441	-25.656		171.443	0.969883	-2.7154	-9.88793	-14.0801	-19.5127	-25.243	-29.8475034447347*
169.773	-0.044349	-5.73095	-9.30496	-13.9901	-18.7468	-25.3799		171.643	0.683962	-2.94575	-9.92107	-14.2287	-19.9842	-25.5405	-29.392010360713*
169.973	0.0798391	-5.61499	-9.27264	-14.012	-18.8748	-25.604		171.843	0.676609	-2.94671	-9.88315	-14.0899	-19.3673	-25.9324	-29.322118295711*
170.173	0.0390044	-5.55778	-9.33482	-13.9107	-18.9365	-25.1742		172.042	0.687615	-2.98679	-10.0067	-14.2427	-19.7292	-26.0946	-29.2247268185118*
170.372	0.0428453	-5.54723	-9.22976	-13.8763	-18.8841	-25.7719		172.242	0.632967	-3.06056	-10.009	-14.2301	-19.7906	-26.3519	-29.258534320036*
170.572	-0.0414425	-5.53142	-9.17626	-14.1632	-18.7648	-25.3245		172.442	0.691266	-3.10504	-10.0868	-14.1269	-19.8655	-25.7727	-29.5635662369928*
170.772	0.137632	-5.90486	-9.20894	-14.0705	-18.7141	-25.7204		172.642	0.540258	-3.23838	-10.3723	-14.08	-20.0126	-25.5456	-28.840724155065*
170.972	-0.602818	-5.29793	-10.7458	-14.4533	-18.7719	-24.8901		172.842	0.862515	-2.78616	-10.7568	-14.1096	-20.4559	-26.0319	-29.242532342211*
171.172	-0.711574	-5.14804	-10.4453	-14.3894	-18.9029	-25.3423		173.042	0.645915	-3.06876	-10.5128	-14.3111	-20.3464	-26.001	-29.4534516875002*
171.371	-0.628869	-4.72555	-10.5256	-14.8035	-18.901	-24.8538		173.242	0.633666	-2.95153	-10.6611	-14.3801	-20.527	-25.6436	-29.6441920154281*
171.571	-0.646678	-4.59893	-10.1724	-14.5495	-18.8555	-26.2482		173.441	0.371515	-3.05634	-10.647	-14.2898	-20.1683	-25.6347	-29.9319587446615*
171.771	-0.929733	-4.41498	-10.4947	-14.8958	-18.873	-24.6699		173.641	0.496845	-3.13658	-10.5661	-14.5731	-19.9727	-26.3148	-29.6008791675911*
171.971	-0.0536841	-5.5691	-9.65171	-14.5886	-19.4106	-25.242		173.841	-0.0496882	-3.26915	-10.5878	-14.4974	-19.9339	-25.6023	-30.1024068389435*
172.171	-0.510147	-5.96133	-9.54136	-14.6559	-19.1931	-26.2525		174.041	0.027161	-3.40126	-10.5185	-14.733	-21.1494	-25.7124	-29.9630495329675*
172.371	-0.526163	-4.68314	-10.1866	-14.7388	-19.4234	-24.986		174.241	0.0125777	-3.40259	-10.1231	-14.5039	-19.6338	-25.1799	-28.8184275064761*
172.571	-0.611436	-5.6592	-10.3733	-14.8558	-19.2672	-25.4404		174.441	1.19385	-3.00826	-9.83467	-13.5157	-17.6003	-23.4313	-26.9900775319664*
172.77	-0.50715	-5.58387	-10.3534	-14.9287	-19.5063	-25.6435		174.64	1.28843	-3.05256	-9.96486	-13.6958	-19.0364	-23.2467	-26.5158700553903*
172.97	-0.471405	-5.16123	-10.588	-15.0397	-19.3037	-25.2113		174.84	1.29776	-3.01303	-9.95967	-13.5957	-19.9047	-23.9596	-27.5192328878834*
173.17	-0.552644	-5.37379	-10.2859	-15.0002	-19.4363	-25.401		175.04	1.63611	-3.11568	-9.90244	-13.6764	-19.4061	-23.2374	-28.7633236079084*
173.37	-0.731002	-4.40949	-10.4303	-15.0212	-19.2551	-25.488		175.24	2.83795	-2.56426	-9.86513	-12.3474	-18.2518	-20.864	-27.7353158782578*
173.57	-0.429601	-5.70649	-9.95471	-15.0253	-19.4517	-25.3231		175.44	3.21046	-1.63292	-10.003	-12.2027	-18.9702	-20.4849	-27.670382768393*
173.77	-0.109831	-6.46787	-10.3418	-14.9352	-19.7835	-25.3555		175.64	3.17602	-1.23226	-10.1616	-12.4375	-18.6277	-21.8263	-28.2259867947748*
173.969	-0.31602	-5.47466	-10.2933	-15.0233	-19.657	-25.8342		175.839	2.84525	-1.32781	-10.0822	-12.5591	-19.403	-21.9217	-28.0287568857662*
174.169	-0.512516	-4.92153	-10.2391	-15.1976	-19.4921	-25.6297		176.039	2.72021	-1.38907	-9.90058	-12.5639	-19.623	-22.2618	-28.7834114245263*
174.369	-0.337102	-4.28951	-10.0845	-14.9741	-19.236	-24.7554		176.239	3.01558	-1.09594	-10.2249	-12.4577	-19.7195	-23.0293	-27.7168587582245*
174.569	-0.342186	-3.99662	-10.2363	-14.7041	-18.9611	-24.542		176.439	2.57664	-1.39199	-10.1834	-12.615	-19.5539	-23.2733	-27.8228833751253*
174.769	-0.342257	-4.36077	-9.96492	-14.7697	-19.0603	-24.8862		176.639	1.96535	-1.92856	-10.0205	-12.7167	-19.7801	-23.3998	-28.5644293421902*
174.969	-0.662749	-4.40937	-10.1187	-15.118	-18.9327	-24.49		176.839	1.44842	-2.25825	-9.85196	-12.7515	-21.5609	-23.5046	-28.4725779121469*
175.168	-0.796164	-3.93851	-10.3675	-15.0881	-19.3221	-24.5984		177.038	1.89638	-1.90556	-10.1333	-13.1901	-20.3506	-24.0302	-28.163695322404*
175.368	-0.255464	-5.87637	-9.5844	-14.8078	-19.5172	-25.2329		177.238	1.86954	-1.96838	-10.0766	-13.1474	-20.336	-24.3398	-28.4141559895241*
175.568	-0.373606	-4.41287	-9.71951	-15.0155	-19.5355	-25.4849		177.438	1.77159	-2.07333	-10.1632	-13.224	-20.237	-24.3423	-29.1529622953533*
175.768	-0.385682	-5.07897	-9.8131	-14.9779	-19.6474	-25.4108		177.638	2.02578	-2.7223	-9.59276	-12.4377	-19.8394	-22.4691	-27.7510365211212*
175.968	-0.332784	-5.65588	-10.0667	-14.9098	-19.8491	-25.0958		177.838	2.18199	-2.45928	-9.28182	-12.4905	-18.1374	-22.5935	-26.2708470904522*
176.168	-0.192138	-5.39555	-10.0008	-15.1891	-19.8644	-25.171		178.038	2.3048	-2.40588	-9.26606	-12.8265	-18.0314	-23.2652	-26.6654142569754*
176.368	0.148927	-6.06632	-9.49903	-15.0137	-19.6998	-25.8307		178.238	2.17203	-2.88439	-9.51682	-12.9447	-18.7553	-23.8019	-27.6716154567458*
176.567	-0.492662	-5.27572	-10.4228	-15.3543	-19.7567	-25.373		178.437	1.78872	-2.835	-9.39045	-12.9647	-19.374	-23.6564	-27.7667983294074*
176.767	-0.635071	-5.12163	-10.1718	-15.283	-19.6929	-25.3238		178.637	1.67386	-3.25471	-9.37838	-13.105	-19.2695	-24.1598	-27.0347909139135*
176.967	-0.516911	-5.1148	-10.7148	-15.426	-19.7383	-25.2574		178.837	1.92525	-2.85304	-9.80258	-13.2316	-18.8112	-24.5518	-28.0050462845041*
177.167	-0.274661	-5.51085	-9.84175	-15.3141	-19.4933	-25.5288		179.037	2.27978	-2.34183	-9.59113	-13.2992	-18.3607	-25.5991	-28.8437610715916*
177.367	-0.46613	-5.4091	-9.97762	-15.4415	-19.7091	-25.257		179.237	1.7016	-3.13775	-9.45458	-13.3782	-18.9787	-25.0669	-28.3192141961344*
177.567	-0.385543	-4.9941	-10.5916	-15.5253	-19.6506	-25.41		179.437	1.30892	-3.44662	-9.5585	-13.4356	-19.2648	-25.4074	-29.2602985199535*
177.766	-0.276193	-5.25319	-9.54284	-15.3956	-19.6987	-25.3639		179.636	1.43753	-3.02697	-9.43923	-13.5628	-18.5555	-25.4196	-29.4762659742239*
177.966	-0.713359	-5.22791	-10.1227	-15.3641	-19.716	-25.2421		179.836	1.15916	-3.51333	-9.61392	-13.785	-19.5338	-24.9364	-29.8183851397397*
178.166	-0.786031	-1.94422	-11.2299	-15.1371	-19.28	-25.9591		180.036	1.40687	-3.51785	-9.80372	-13.8817	-19.2136	-25.9882	-29.6554986332822*
178.366	-0.198298	-3.28252	-9.93722	-14.6496	-19.0525	-23.4191		180.236	1.43466	-3.14041	-9.59956	-13.8982	-18.6069	-25.302	-29.8379630736975*
178.566	-0.0941026	-4.26067	-9.68052	-14.5945	-19.2643	-24.4642		180.436	1.36331	-3.35589	-9.54126	-13.9312	-18.9008	-25.7804	-29.635631881808*
178.766	-0.151999	-4.87232	-9.24133	-14.8561	-19.3468	-24.4276		180.636	1.26928	-3.48629	-9.70254	-14.0017	-19.2393	-25.6714	-29.7864883051623*
178.965	-0.355187	-4.59554	-9.76373	-14.9844	-19.2997	-25.1663		180.835	1.09156	-3.02535	-9.80913	-14.1487	-18.6989	-25.5517	-30.1238880710099*
179.165	-0.274144	-5.16553	-9.76724	-14.8036	-19.4799	-24.6112		181.035	1.18422	-3.10313	-9.74716	-13.878	-19.8536	-25.8597	-29.3451002007587*
179.365	-0.222787	-4.8693	-10.2	-14.8869	-19.4818	-24.7013		181.235	0.913088	-3.3956	-9.70595	-13.9237	-19.5642	-26.0364	-29.9641982756983*
179.565	-0.18206	-4.0852	-10.0037	-14.7935	-19.497	-25.3147		181.435	0.800321	-3.60767	-9.84156	-14.0753	-18.8326	-26.266	-30.056574598998*
179.765	-0.377936	-4.79278	-9.9803	-15.0157	-19.5087	-24.8594		181.635	0.795125	-3.48349	-10.0321	-14.1875	-19.0999	-25.9547	-30.3816348587712*
179.965	-0.340533	-4.66137	-9.01509	-15.2736	-19.1525	-24.7761		181.835	0.73751	-3.65271	-10.1893	-14.1485	-19.6125	-25.7211	-30.7271783279117*
180.165	0.0503587	-5.24335	-9.22109	-15.1482	-19.755	-25.2321		182.035	0.741476	-3.56202	-10.1563	-14.3204	-19.5308	-25.9911	-30.0772299298681*
180.364	-0.131688	-5.9874	-9.57033	-15.1158	-19.8308	-25.1007		182.234	0.686212	-3.51564	-10.2029	-14.2626	-19.1429	-26.0459	-30.5523446832666*
180.564	-0.421126	-5.48984	-10.2714	-15.2032	-19.614	-25.1246		182.434	0.742792	-3.65044	-10.2858	-14.2208	-19.0983	-25.9193	-30.4400720194235*
180.764	-0.369054	-5.10982	-9.85847	-15.2009	-19.6781	-24.9267		182.634	0.620948	-3.65021	-10.1988	-14.3591	-19.5555	-26.1073	-30.4892774359933*
180.964	-0.143426	-5.58307	-9.82229	-15.0006	-19.6456	-25.4683		182.834	0.601871	-3.61223	-10.2777	-14.462	-19.4624	-26.4266	-30.6454954396123*
181.164	0.0100635	-6.35195	-9.68577	-15.0368	-19.8218	-25.1575		183.034	0.518614	-3.67797	-10.335	-14.4935	-20.0699	-26.2764	-30.2058084451355*
181.363	-0.0860303	-5.57637	-9.88512	-15.0485	-19.8081	-25.4166		183.233	0.483768	-3.66456	-10.3805	-14.5432	-19.0784	-25.9376	-30.6188750570246*
181.563	-0.192851	-5.20104	-9.78532	-15.117	-19.6992	-25.6802		183.433	0.545467	-3.66904	-10.3768	-14.5689	-19.5409	-26.0338	-30.9003562583119*
181.763	-0.47285	-4.7765	-10.8543	-15.235	-19.417	-25.176		183.633	0.567391	-3.71219	-10.4319	-14.677	-19.697	-26.3906	-30.5549840464278*
181.963	-0.375614	-4.65822	-10.9067	-15.1155	-19.5828	-25.175		183.833	0.49031	-3.73181	-10.6021	-14.8023	-19.1945	-25.7888	-31.3382788026947*
182.163	-0.492673	-4.67629	-10.7968	-15.278	-19.6236	-24.933		184.033	0.36067	-3.81162	-10.4561	-14.7386	-19.1403	-26.3307	-30.5593430325844*
182.363	-0.266698	-5.3305	-10.3737	-15.1536	-19.5913	-24.8192		184.233	0.455646	-3.85763	-10.656	-14.6909	-19.5014	-26.1019	-30.7577135194693*
182.563	-0.412943	-5.57176	-10.6066	-15.3384	-19.6879	-24.7259		184.433	0.467351	-3.7726	-10.4497	-14.8394	-18.8894	-25.9205	-30.7978357058855*
182.762	-0.521482	-5.50799	-10.4827	-15.3388	-19.6377	-25.3878		184.632	0.406086	-3.76045	-10.5201	-14.9177	-19.2219	-26.6089	-30.5785900283832*
182.962	-0.0831664	-5.79904	-10.029	-15.1239	-19.7176	-25.0616		184.832	0.362396	-4.0356	-10.5897	-14.9284	-19.8605	-26.1583	-30.6850968038278*
183.162	0.0233583	-5.7334	-10.2218	-15.0636	-19.6771	-25.5483		185.032	0.250533	-3.90945	-10.5631	-14.9605	-19.3163	-26.2643	-31.0041868264047*
183.362	-0.224457	-5.74078	-10.0097	-15.0814	-19.7171	-25.2662		185.232	0.196979	-3.9402	-10.6612	-14.9307	-19.8737	-26.2603	-30.9020160663559*
183.562	-0.188606	-5.54646	-10.6082	-15.0686	-19.7563	-25.3753		185.432	0.211084	-4.06364	-10.658	-15.0463	-19.5732	-26.1885	-30.6923164457227*
183.762	-0.105942	-5.30265	-9.95574	-15.1379	-19.8548	-25.3925		185.632	0.187944	-4.0201	-10.593	-14.997	-20.2394	-25.9142	-30.733813693722*
183.961	-0.327413	-5.2638	-10.2897	-15.178	-19.7411	-25.2752		185.831	0.121367	-3.95696	-10.5368	-15.0256	-19.6795	-25.8547	-30.8723289734824*
184.161	-0.194619	-5.64726	-10.2652	-15.3278	-19.8075	-25.0965		186.031	0.0701262	-4.00511	-10.5303	-15.1313	-19.5555	-26.2652	-30.6925006666758*
184.361	-0.176805	-4.99912	-10.1269	-15.1883	-19.812	-25.6851		186.231	0.0991695	-4.06323	-10.6213	-15.2346	-19.8663	-25.9748	-30.7428227806279*
184.561	-0.138183	-5.67111	-10.2477	-15.1413	-19.8569	-25.4773		186.431	0.185588	-4.02221	-10.5174	-15.1688	-20.2425	-26.1651	-30.5382959024108*
184.761	-0.179942	-4.84724	-10.7202	-15.2861	-19.7794	-25.4435		186.631	0.423248	-3.82944	-10.6452	-15.3151	-19.4179	-26.3444	-30.7473009418208*
184.961	-0.0613051	-5.83771	-10.2725	-15.2927	-19.8341	-25.3588		186.831	0.201948	-4.22869	-10.6349	-15.144	-20.1703	-26.1429	-30.4473673965991*
185.161	-0.0791681	-5.31255	-10.6064	-15.2018	-19.8202	-25.3035		187.03	0.0715262	-4.22295	-10.6584	-15.2913	-19.8852	-26.2905	-30.5135586673434*
185.36	-0.172944	-5.71747	-10.5838	-15.2153	-19.9265	-25.0972		187.23	-0.0113919	-4.18064	-10.7524	-15.1463	-20.1697	-26.4085	-30.5004591929792*
185.56	-0.373943	-6.14052	-10.6171	-15.1644	-19.8741	-25.0396		187.43	0.215977	-4.15572	-10.7718	-15.3871	-19.6236	-26.354	-30.2533845524636*
185.76	-0.271987	-5.89178	-10.6311	-15.3478	-19.7575	-24.6461		187.63	-0.00957777	-4.21182	-10.6357	-15.3079	-19.636	-25.9826	-30.0024099930347*
185.96	-0.0233822	-5.29185	-10.6	-15.3696	-19.8268	-25.1095		187.83	0.0853338	-3.75268	-10.646	-15.2918	-19.9989	-26.2607	-29.6714009953327*
186.16	-0.220565	-5.17343	-10.2942	-15.344	-19.7847	-25.0081		188.03	0.0646906	-3.42291	-10.5783	-15.2852	-19.8385	-26.0414	-29.9300114154707*
186.359	-0.227231	-5.80139	-10.3483	-15.2506	-19.7832	-25.0752		188.23	0.0777145	-3.43588	-10.3965	-15.2486	-19.8768	-26.0338	-30.0383111383988*
186.559	-0.268633	-5.70234	-10.4176	-15.5248	-19.8643	-25.338		188.429	0.136206	-3.58961	-10.2607	-15.3679	-20.3878	-26.2056	-29.689470114198*
186.759	-0.257537	-6.16433	-10.6764	-15.2313	-19.9839	-25.3804		188.629	0.114696	-3.5445	-10.4459	-15.3232	-20.4164	-26.2232	-30.0637825280792*
186.959	-0.11965	-5.76335	-10.5455	-15.3575	-20.0132	-25.5632		188.829	0.122984	-3.53915	-10.447	-15.354	-19.698	-26.1445	-29.6235633624812*
187.159	0.111747	-6.17683	-10.0515	-15.3372	-20.0031	-25.1215		189.029	0.170669	-3.69366	-10.2781	-15.5204	-20.0107	-26.4264	-29.811687457212*
187.359	-0.0826994	-5.78788	-9.37835	-15.2626	-20.1396	-26.6888		189.229	0.0935966	-3.78229	-10.4116	-15.3588	-19.6407	-26.2345	-29.8151201758678*
187.559	0.0234318	-6.18934	-9.87677	-15.2688	-20.2311	-25.4602		189.429	0.0221438	-3.75148	-10.4244	-15.5691	-19.919	-25.9922	-30.156071653461*
187.758	0.0220942	-6.71414	-9.95393	-15.3239	-20.3412	-25.2434		189.628	-0.0832967	-3.76678	-10.5244	-15.4893	-19.9136	-26.1698	-29.9029422388006*
187.958	-0.206858	-6.12358	-9.95607	-15.3189	-20.3007	-25.1595		189.828	-0.260837	-3.93526	-10.3449	-15.527	-19.7866	-26.094	-30.0279586258784*
188.158	0.282992	-6.3477	-9.56434	-15.2195	-20.2699	-25.744		190.028	-0.164737	-3.90367	-10.4338	-15.5293	-19.9584	-26.2804	-30.1012338973122*
188.358	0.262179	-6.49162	-9.21421	-15.374	-20.3847	-25.6227		190.228	-0.121295	-3.93827	-10.548	-15.6492	-20.241	-26.0439	-30.3786018086103*
188.558	-0.215375	-5.66586	-10.4597	-15.3833	-20.0994	-26.0718		190.428	-0.125709	-3.93837	-10.5126	-15.5517	-19.7756	-26.0779	-29.933929249303*
188.758	-0.316782	-5.22475	-10.3012	-15.4608	-20.1308	-25.1377		190.628	-0.029485	-4.05541	-10.5778	-15.6299	-20.0405	-25.8958	-30.3954782673793*
188.957	-0.373422	-4.64921	-10.9472	-15.5734	-20.1341	-25.6708		190.827	-0.335147	-4.15304	-10.4588	-15.5236	-20.1835	-26.1074	-29.2619737934602*
189.157	-0.405619	-5.49824	-11.0261	-15.5246	-20.1773	-25.3781		191.027	-0.355252	-4.43535	-10.5231	-15.4835	-20.3483	-26.1213	-29.6205826219736*
189.357	-0.530228	-6.01878	-10.6346	-15.404	-20.1781	-25.0711		191.227	-0.919146	-4.81427	-10.5058	-15.1773	-20.9767	-25.5194	-29.5615798347653*
189.557	-0.393845	-5.42728	-11.073	-15.4839	-20.1501	-24.9982		191.427	-1.14146	-5.29956	-10.3063	-15.2032	-21.8716	-25.1309	-29.6338528987276*
189.757	-0.378114	-5.18135	-11.0325	-15.3844	-20.2614	-25.1803		191.627	-0.941449	-5.32314	-10.4252	-15.2728	-21.5282	-25.7395	-29.0696803236945*
189.957	-0.445476	-5.88372	-10.8623	-15.5115	-20.2638	-25.0526		191.827	-0.881038	-5.14494	-10.6237	-15.473	-21.0272	-25.4717	-29.7675550080803*
190.156	-0.355916	-5.57465	-11.2399	-15.3958	-20.242	-25.1201		192.026	-0.712647	-5.19072	-10.624	-15.5299	-20.84	-25.2986	-30.0457699491261*
190.356	-0.242099	-6.16787	-11.2024	-15.5081	-20.282	-25.0114		192.226	-0.631371	-5.21568	-10.5876	-15.6318	-20.1955	-25.4158	-29.6893463904962*
190.556	-0.44447	-5.61874	-11.5503	-15.4609	-20.2948	-25.1258		192.426	-0.777856	-5.30976	-10.4722	-15.6125	-20.3678	-25.6014	-29.9601796661817*
190.756	-0.402698	-5.4161	-11.1684	-15.3788	-20.2251	-25.0449		192.626	-0.613454	-5.27438	-10.3682	-15.6282	-20.5235	-25.6606	-30.0389960082211*
190.956	-0.375822	-5.56414	-11.2835	-15.5144	-20.1559	-25.4496		192.826	-0.72228	-5.25758	-10.3938	-15.6829	-20.719	-26.1208	-29.7215479856627*
191.156	-0.478912	-5.83765	-11.0863	-15.49	-20.1536	-25.5032		193.026	-0.762984	-5.17685	-10.4007	-15.7593	-20.3744	-25.7846	-29.78497867131*
191.356	-0.384267	-5.47783	-11.2093	-15.403	-20.1792	-25.2922		193.226	-0.727495	-5.31281	-10.4481	-15.7483	-20.6969	-25.7972	-30.1635779749995*
191.555	-0.442318	-5.45604	-11.1391	-15.4319	-20.2009	-24.4397		193.425	-0.611995	-5.13609	-10.108	-15.3488	-19.8557	-25.2057	-29.3653222030091*
191.755	-0.292342	-5.214	-11.1962	-15.4567	-20.1451	-25.341		193.625	-0.392223	-5.22996	-9.92578	-15.5928	-19.4716	-24.9987	-30.3593900649692*
191.955	-0.396743	-5.36466	-10.9571	-15.5057	-20.2497	-25.0673		193.825	-0.521572	-5.05677	-10.0027	-15.5673	-19.7481	-25.921	-29.413091605878*
192.155	-0.430192	-5.54776	-10.8407	-15.3613	-20.2279	-25.1819		194.025	-0.489433	-5.23842	-9.89098	-15.5485	-20.5684	-25.5346	-29.3874130244837*
192.355	-0.266507	-6.06441	-10.3668	-15.3279	-20.2716	-25.6309		194.225	-0.595811	-5.29745	-9.96045	-15.7082	-20.7916	-25.7098	-29.6077069419524*
192.555	-0.352871	-6.11294	-10.389	-15.449	-20.2699	-24.9452		194.425	-0.58185	-5.26216	-9.95034	-15.6499	-19.9214	-25.2066	-30.2262106200268*
192.754	-0.305181	-6.13325	-10.8278	-15.335	-20.3655	-25.1067		194.624	-0.39204	-5.13738	-9.99493	-15.5569	-19.8148	-25.7226	-29.9113768292527*
192.954	-0.179378	-6.03987	-10.6611	-15.3786	-20.3607	-25.2084		194.824	-0.392726	-5.15473	-10.0621	-15.7111	-20.1597	-25.9097	-29.9140909724749*
193.154	-0.297015	-5.70893	-10.9463	-15.4589	-20.3252	-25.2013		195.024	-0.666585	-5.22028	-10.0483	-15.7813	-20.0925	-25.4277	-29.8741433865842*
193.354	-0.344914	-6.11175	-10.6447	-15.3586	-20.3952	-25.4179		195.224	-0.551052	-5.26239	-9.68945	-15.7213	-20.0979	-25.5014	-29.9906376737085*
193.554	-0.28336	-5.55346	-11.0183	-15.2828	-20.3222	-25.2648		195.424	-0.674982	-5.16693	-9.72945	-15.8565	-20.3509	-25.7038	-30.0610846463362*
193.754	-0.287422	-5.47343	-10.9877	-15.3899	-20.3599	-25.2616		195.624	-0.715989	-5.23402	-9.79874	-15.7801	-20.5436	-25.6452	-30.3716755556407*
193.953	-0.268221	-5.81421	-10.9026	-15.3839	-20.3644	-25.6097		195.823	-0.660577	-5.27325	-9.92308	-15.8735	-20.9428	-25.6205	-29.8982826995704*
194.153	-0.169807	-6.0408	-11.0821	-15.5077	-20.4088	-25.4383		196.023	-0.667587	-5.32702	-10.0359	-15.7219	-20.0477	-25.6734	-30.1319958171019*
194.353	-0.106259	-5.80425	-10.7744	-15.3855	-20.2306	-25.485		196.223	-0.660224	-5.18467	-9.95318	-15.869	-20.4742	-25.4907	-29.9172139497529*
194.553	-0.128407	-5.51698	-10.6056	-15.3422	-20.3964	-24.9522		196.423	0.60869	-4.57219	-9.00138	-14.6769	-19.2901	-23.0989	-28.1110954641986*
194.753	-0.232067	-6.02095	-10.9548	-15.3185	-20.2992	-25.1888		196.623	1.20669	-4.1344	-8.82594	-14.212	-19.9688	-21.818	-27.9929177227926*
194.953	-0.176186	-6.16341	-10.8508	-14.9172	-20.2527	-24.9981		196.823	1.07094	-4.25168	-8.93201	-14.4903	-20.1895	-23.0422	-28.0940243225458*
195.153	-0.229715	-5.62437	-10.92	-15.0072	-20.3954	-25.1136		197.023	0.868236	-4.19295	-9.02105	-14.6243	-20.673	-23.2151	-28.0349701354173*
195.352	0.0587842	-6.77831	-9.84963	-14.8992	-20.6025	-25.2137		197.222	0.880311	-4.27835	-9.2517	-14.7407	-20.8013	-23.8397	-28.6327537096247*
195.552	-0.0282999	-6.13603	-10.3507	-15.1515	-20.3898	-25.1491		197.422	0.617855	-4.40872	-9.26341	-14.7829	-19.8509	-23.5799	-28.7719233149185*
195.752	-0.386846	-5.61484	-10.6048	-15.2237	-20.3246	-25.8297		197.622	0.699883	-4.50914	-9.15434	-14.8247	-20.4196	-24.0041	-28.6362357130714*
195.952	-0.360103	-5.73439	-10.6903	-15.2472	-20.4007	-25.4042		197.822	0.500592	-4.5517	-9.23715	-14.8352	-19.9728	-23.9798	-29.0375678823719*
196.152	-0.496233	-5.98333	-11.1582	-15.2966	-20.3733	-25.0343		198.022	0.411044	-4.60092	-9.25566	-14.8751	-20.7959	-24.2691	-28.8027439352366*
196.351	-0.472175	-5.28791	-10.8209	-15.4451	-20.395	-25.2635		198.221	0.457013	-4.18387	-9.40382	-14.966	-20.2692	-24.2953	-29.2417786283362*
196.551	-0.450469	-5.08857	-11.1091	-15.401	-20.425	-25.7623		198.421	0.534072	-3.43276	-9.41252	-14.8911	-20.5474	-23.9979	-29.6614958213217*
196.751	-0.305125	-5.95663	-11.2172	-15.3918	-20.3936	-25.0082		198.621	0.411974	-3.41271	-9.28804	-14.9886	-20.8846	-24.5435	-29.6328173950247*
196.951	-0.27021	-5.83495	-11.4075	-15.461	-20.3661	-25.0623		198.821	0.428832	-3.40411	-9.42859	-15.1052	-20.7404	-24.676	-29.8931798473999*
197.151	-0.432976	-5.59307	-11.4779	-15.4819	-20.3975	-25.1753		199.021	0.40167	-3.42617	-9.38825	-15.0674	-20.5395	-24.7723	-29.9373617405256*
197.351	-0.38651	-5.63675	-11.4948	-15.5375	-20.4855	-25.4621		199.221	0.244099	-3.4879	-9.48004	-14.9968	-20.2437	-24.7605	-30.2605375564087*
197.551	-0.456606	-5.79716	-11.3515	-15.4884	-20.3367	-25.1061		199.421	0.207144	-3.08378	-9.07795	-15.0128	-19.7129	-24.834	-29.8643305277397*
197.75	-0.397871	-5.47371	-11.483	-15.5387	-20.4006	-25.1768		199.62	0.430379	-3.08893	-8.84216	-15.1264	-20.1527	-24.9004	-29.2447802927052*
197.95	-0.450322	-6.10995	-11.4343	-15.5223	-20.489	-25.1915		199.82	0.789918	-2.05095	-9.02671	-15.0494	-20.1251	-25.6409	-29.655635548114*
198.15	-0.369181	-6.14672	-11.1683	-15.3495	-20.4498	-25.3301		200.02	0.197828	-2.7409	-8.81698	-14.999	-20.2014	-24.6505	-29.5605024833397*
198.35	-0.312045	-6.07666	-11.3846	-15.4899	-20.4125	-25.1805		200.22	0.199706	-2.8967	-9.03672	-14.9732	-20.0496	-25.4865	-30.2627845971698*
198.55	-0.479154	-5.6087	-11.5843	-15.5399	-20.4542	-25.4794		200.42	-0.0866406	-3.2688	-8.88133	-14.9267	-21.037	-24.6769	-30.2554928589267*
198.75	-0.590773	-5.68091	-11.5807	-15.4612	-20.4713	-25.3353		200.62	-0.0978116	-3.33158	-9.1708	-14.987	-20.5115	-24.972	-29.9977151129479*
198.949	-0.422841	-5.89527	-11.3028	-15.3548	-20.5191	-25.5204		200.819	-0.0269613	-3.35483	-9.25439	-15.1785	-20.1786	-24.7206	-29.7199081917469*
199.149	-0.658853	-5.60832	-10.6534	-15.428	-20.3613	-25.1184		201.019	-0.11782	-3.78252	-9.28548	-15.1354	-20.852	-24.9216	-30.3095999174483*
199.349	-0.527854	-5.15111	-10.9019	-15.6106	-20.3548	-25.4029		201.219	-0.636079	-4.28815	-9.30228	-15.0583	-21.1224	-24.7778	-30.1707806958587*
199.549	-0.284014	-5.63535	-11.0775	-15.4963	-20.4711	-25.7269		201.419	-0.503596	-4.33536	-9.15898	-15.0468	-20.5926	-24.9884	-29.8851731271688*
199.749	-0.614524	-5.67264	-11.055	-15.6914	-20.4558	-25.0211		201.619	-0.91049	-4.506	-9.1594	-14.9003	-21.2758	-24.6363	-30.0629187137558*
199.949	-0.454817	-5.53994	-11.1602	-15.5264	-20.4791	-25.1478		201.819	-0.758012	-4.54219	-9.20539	-14.9307	-21.7161	-24.6617	-28.6847301732222*
200.149	-0.393565	-4.2074	-11.2963	-14.9225	-20.4343	-24.7198		202.018	-0.498669	-4.46723	-9.32391	-15.0719	-21.3526	-24.9531	-29.8105933666972*
200.348	-0.548146	-5.14903	-11.2549	-14.8601	-20.4032	-24.9299		202.218	-0.466986	-4.47901	-9.51813	-15.2947	-21.3473	-25.24	-29.4257332570587*
200.548	-0.504957	-5.17428	-11.287	-15.1111	-20.517	-25.0688		202.418	-0.419975	-4.34314	-9.46158	-15.2683	-20.6484	-25.3597	-29.2021772641207*
200.748	-0.475877	-6.05665	-10.9473	-15.2198	-20.4825	-25.0005		202.618	-0.420949	-4.38116	-9.55841	-15.389	-20.5282	-24.9454	-28.6949937820753*
200.948	-0.358044	-5.29415	-11.0194	-15.2097	-20.4747	-24.9315		202.818	-0.374643	-4.31979	-9.58	-15.2149	-20.3884	-25.1217	-28.34792446309*
201.148	-0.517307	-5.30353	-11.4548	-15.1735	-20.3875	-24.645		203.018	-0.281367	-4.40557	-9.54758	-15.3262	-21.0251	-24.8961	-28.3765100966106*
201.347	-0.413545	-5.0946	-11.1296	-15.0114	-20.4098	-24.6187		203.218	-0.333258	-4.33123	-9.5358	-15.2974	-20.9724	-25.2626	-29.2570207515881*
201.547	-0.505572	-5.64994	-11.4157	-15.1461	-20.5593	-25.0138		203.417	-0.317448	-4.43675	-9.62363	-15.4253	-20.8789	-25.1597	-28.653291844128*
201.747	-0.578716	-4.98389	-10.6962	-15.1874	-20.4688	-25.0845		203.617	-0.421751	-4.57294	-9.55034	-15.5142	-20.2685	-25.5368	-28.8763843280507*
201.947	-0.534451	-5.79264	-10.7461	-15.2445	-20.477	-24.9312		203.817	-0.362048	-4.4834	-9.67045	-15.473	-20.9727	-25.4538	-29.5315506822456*
202.147	-0.526684	-5.32834	-10.8948	-15.225	-20.4898	-25.0952		204.017	1.01487	-3.99357	-8.3304	-14.1588	-17.7805	-22.4639	-27.3993141447541*
202.347	-0.440982	-5.27865	-10.8593	-15.2072	-20.5235	-25.0907		204.217	2.03513	-3.3207	-8.02026	-13.2779	-16.9373	-20.1101	-25.6920362275133*
202.547	-0.446726	-5.8448	-11.2742	-15.1701	-20.5601	-25.0349		204.417	1.78581	-2.91439	-8.1068	-13.5272	-17.9885	-21.0239	-26.7540745707314*
202.746	-0.477821	-5.88338	-10.2654	-15.1731	-20.4141	-24.5249		204.616	1.84124	-3.23146	-8.16688	-13.773	-18.3803	-21.5065	-27.1279043712021*
202.946	-0.341782	-6.17699	-11.1772	-15.2138	-20.4115	-24.4881		204.816	1.50423	-3.21461	-8.33778	-13.8498	-19.2626	-22.005	-28.1374749949477*
203.146	-0.387768	-5.85083	-10.7758	-15.3082	-20.5	-25.0249		205.016	2.26744	-2.22611	-8.6464	-13.9732	-18.2302	-23.2426	-28.3301635163128*
203.346	-0.270589	-6.21632	-11.2613	-15.1916	-20.6193	-25.1554		205.216	1.75019	-2.50094	-8.75501	-13.9591	-18.8577	-23.0804	-28.7001194458034*
203.546	-0.442517	-5.67272	-11.1412	-15.1974	-20.5491	-24.9759		205.416	1.43544	-3.09468	-8.67804	-14.0289	-19.2258	-23.2705	-28.8424933585144*
203.746	-0.30767	-5.385	-11.1825	-15.3384	-20.572	-24.9443		205.616	0.355178	-4.05225	-8.64307	-13.7733	-20.8511	-23.1454	-28.5247040268396*
203.945	-0.584409	-6.3106	-10.9534	-15.1272	-20.5025	-25.5944		205.815	0.400067	-4.11517	-8.64035	-13.851	-20.814	-22.8429	-28.6677968561343*
204.145	-0.331286	-5.26439	-11.219	-15.3382	-20.5709	-24.7831		206.015	1.1859	-3.27659	-8.99327	-14.251	-19.6573	-24.099	-28.7526613085235*
204.345	-0.313276	-5.34502	-11.2862	-15.3615	-20.5465	-25.4934		206.215	1.0422	-3.50076	-8.97072	-14.4397	-19.6274	-24.4745	-29.0455148558816*
204.545	-0.509422	-5.8497	-11.448	-15.3925	-20.5616	-25.0192		206.415	0.762102	-3.78137	-9.01585	-14.4327	-19.634	-24.3599	-29.0551698532896*
204.745	-0.391848	-5.87563	-11.3899	-15.3716	-20.6922	-25.6524		206.615	0.799141	-3.75755	-9.16592	-14.6224	-19.6907	-24.6225	-29.843066403478*
204.945	-0.28512	-6.04467	-10.6691	-15.1788	-20.5516	-25.6793		206.815	0.533069	-3.9024	-9.13009	-14.5303	-20.4124	-24.5526	-29.7092320189323*
205.144	-0.53613	-5.81231	-10.5998	-15.3403	-20.5409	-25.3199		207.014	0.49607	-3.9094	-9.22883	-14.6391	-20.2306	-24.965	-29.761159129509*
205.344	-0.452079	-5.64034	-11.028	-15.3364	-20.6094	-25.2607		207.214	0.236458	-4.05763	-9.21426	-14.7268	-20.1218	-24.5737	-29.9518150569484*
205.544	-0.495624	-6.21094	-11.0375	-15.3236	-20.5321	-25.026		207.414	-0.293617	-4.39094	-9.29406	-14.3119	-20.9543	-24.3815	-29.6889456530649*
205.744	-0.439424	-6.69805	-11.0068	-15.348	-20.5825	-25.77		207.614	-0.214004	-4.3715	-9.22428	-14.4632	-20.6928	-24.3763	-30.0741074756866*
205.944	-0.353094	-5.59837	-11.0556	-15.3949	-20.6177	-25.3787		207.814	-0.467131	-4.57885	-9.34202	-14.437	-20.7937	-24.8211	-29.6883936725055*
206.144	-0.459998	-6.32883	-11.2547	-15.327	-20.5812	-25.3312		208.014	0.0656479	-4.17996	-9.41352	-14.7729	-20.3518	-24.8658	-29.3700259780113*
206.344	-0.51712	-5.78705	-11.5814	-15.4064	-20.5833	-25.5344		208.214	0.304407	-3.76144	-9.40877	-14.7789	-20.137	-25.0722	-29.4816327172239*
206.543	-0.495681	-6.41708	-11.2385	-15.2798	-20.5617	-25.3473		208.413	-0.165226	-4.34796	-9.36286	-14.7934	-20.9623	-24.3673	-29.9983952855908*
206.743	-0.350032	-5.98454	-11.1849	-15.4068	-20.6262	-25.8598		208.613	0.292495	-4.02536	-9.5509	-14.9803	-19.8805	-25.4385	-30.1552152307191*
206.943	-0.406301	-5.72396	-10.7021	-15.3588	-20.5881	-25.5125		208.813	0.0473549	-3.99767	-9.68474	-14.9172	-20.5905	-25.5476	-29.4381542979624*
207.143	-0.67889	-5.51027	-11.3795	-15.4918	-20.5006	-24.9909		209.013	0.0921117	-4.1305	-9.81872	-15.1067	-19.9075	-25.6472	-29.8563959038569*
207.343	-0.742097	-5.36144	-11.4807	-15.5474	-20.5564	-25.6374		209.213	-0.0337293	-4.25202	-9.77377	-15.1455	-20.1756	-25.6292	-30.0582183502527*
207.543	-0.567488	-5.43342	-11.4606	-15.6719	-20.6495	-25.4128		209.413	-0.163232	-4.48664	-10.0088	-15.0656	-20.2608	-25.5747	-30.5852331269248*
207.742	-0.553416	-5.76896	-11.6051	-15.2983	-20.6974	-25.4566		209.612	-0.161305	-4.07988	-9.97556	-15.0509	-19.3824	-25.6801	-30.5445225706251*
207.942	-0.550851	-5.25143	-10.7661	-15.4034	-20.6427	-25.434		209.812	0.0280362	-4.34839	-9.97945	-15.063	-20.3313	-26.0031	-30.6307225112076*
208.142	-0.416009	-5.76107	-10.7172	-15.4823	-20.6916	-25.5957		210.012	0.127554	-3.8622	-9.88143	-14.9247	-20.6711	-25.5955	-29.5285230904833*
208.342	-0.548646	-5.3669	-10.8663	-15.4406	-20.6242	-25.3968		210.212	0.191283	-3.78921	-9.81895	-15.1426	-19.8193	-26.0656	-29.3398965274171*
208.542	-0.783925	-5.66515	-10.8798	-15.5897	-20.6574	-25.2535		210.412	0.512985	-3.42367	-10.0722	-15.161	-19.8229	-26.0892	-30.1546704597945*
208.742	-0.544713	-5.6323	-11.1044	-15.4732	-20.7082	-25.4471		210.612	0.421552	-3.48277	-10.0764	-15.2397	-18.7556	-25.9166	-30.4765652804971*
208.941	-0.41628	-5.94918	-10.7699	-15.4987	-20.7575	-25.3477		210.811	0.0625051	-4.18533	-9.74611	-14.8576	-20.3069	-25.724	-29.5727158776629*
209.141	-0.381243	-5.95671	-11.0723	-15.5214	-20.7444	-24.8347		211.011	0.123153	-3.64056	-10.0253	-15.0246	-19.3657	-26.2768	-30.2123658240757*
209.341	-0.501101	-6.06236	-10.9437	-15.4655	-20.721	-25.1588		211.211	0.044354	-3.9972	-10.1081	-15.06	-19.9105	-25.5591	-30.112464393249*
209.541	-0.334309	-6.1624	-11.1736	-15.5773	-20.7258	-24.9949		211.411	-0.293733	-4.16554	-10.2026	-14.8477	-20.2147	-25.4251	-30.4862584866954*
209.741	-0.461884	-6.43758	-11.0915	-15.4349	-20.8403	-24.983		211.611	-0.43534	-4.53628	-9.91135	-14.959	-20.2948	-25.0793	-30.3092658179667*
209.941	-0.466913	-5.65136	-10.6137	-15.5357	-20.747	-25.6184		211.811	0.638205	-4.02431	-9.16512	-13.9976	-18.9645	-23.246	-27.5239703230103*
210.141	-0.445884	-5.87408	-10.8133	-15.5791	-20.8052	-25.4945		212.011	0.63637	-4.05161	-8.59722	-14.2719	-19.3941	-23.7135	-27.3078814193708*
210.34	-0.519771	-5.79368	-10.6662	-15.421	-20.7011	-25.9762		212.21	0.581575	-3.87428	-8.62242	-14.4705	-19.7071	-24.0043	-27.7026328068472*
210.54	-0.336506	-5.83191	-10.9379	-15.6446	-20.6952	-25.2533		212.41	0.613949	-3.91344	-8.63927	-14.6348	-19.6016	-24.5863	-28.2097369146795*
210.74	-0.379193	-5.86307	-10.9526	-15.6882	-20.7559	-24.9589		212.61	0.407167	-3.70119	-8.73176	-14.6818	-20.4945	-24.2956	-28.9491436443559*
210.94	-0.357714	-5.60678	-10.8884	-15.6641	-20.7746	-25.1503		212.81	0.64258	-3.84352	-8.83582	-14.7674	-18.7715	-24.941	-28.8557381627416*
211.14	-0.332741	-5.62942	-10.9393	-15.6761	-20.7691	-25.606		213.01	0.538799	-3.6908	-8.89184	-14.9359	-19.2945	-25.2327	-29.045241026218*
211.339	-0.416568	-6.27917	-11.0081	-15.5676	-20.7749	-25.1663		213.209	0.411953	-3.82142	-8.70896	-14.7701	-19.455	-24.7132	-28.5781224174033*
211.539	-0.355367	-4.933	-10.7596	-15.1181	-20.4861	-24.2907		213.409	1.24858	-3.75363	-8.41244	-14.1005	-18.9264	-23.4226	-27.7720354354404*
211.739	-0.249227	-3.65592	-10.679	-14.3317	-20.3214	-23.584		213.609	1.31723	-3.75945	-8.49567	-14.1593	-19.5391	-24.0996	-28.2047468011836*
211.939	-0.462951	-1.30606	-10.0639	-14.045	-19.8029	-22.9123		213.809	2.23157	-3.84273	-7.61746	-13.0925	-17.62	-21.9176	-27.52448204788*
212.139	-0.31038	-3.32782	-9.77352	-14.133	-20.2134	-23.1941		214.009	3.20424	-3.02105	-6.69772	-12.365	-15.2047	-19.8577	-25.8337908394154*
212.339	-0.412859	-4.22698	-9.77119	-14.1719	-20.3055	-23.6073		214.209	3.56349	-2.28643	-6.1881	-12.0956	-13.2745	-19.7254	-25.2672113380286*
212.539	-0.589219	-4.75086	-9.48291	-14.3074	-20.3337	-23.5525		214.409	3.38268	-1.82303	-6.22323	-12.3524	-12.5775	-20.9291	-26.3397252579123*
212.738	-0.641646	-4.50076	-9.8599	-14.2841	-20.3367	-24.124		214.608	3.13506	-1.89556	-6.45309	-12.6171	-14.2714	-21.1421	-27.3891023906879*
212.938	-0.390321	-4.73771	-9.4673	-14.182	-20.3113	-23.6218		214.808	2.97751	-1.28752	-6.71893	-12.7836	-15.1571	-22.208	-27.3502840792396*
213.138	1.64877	-1.28191	-7.47455	-12.5467	-18.4272	-20.5992		215.008	2.8595	-1.26018	-6.84021	-12.8676	-16.5087	-22.1505	-28.1812436190687*
213.338	0.703944	-2.85871	-7.34813	-12.6868	-18.8735	-21.3342		215.208	2.5675	-1.50833	-6.93933	-12.9851	-16.6658	-22.5634	-28.3693659625632*
213.538	0.337533	-3.05348	-7.56694	-13.0046	-19.0661	-21.6291		215.408	2.49943	-1.48386	-7.24065	-13.1363	-17.7168	-23.3608	-29.1316033541591*
213.738	0.222875	-3.7452	-8.39856	-13.0421	-19.3272	-22.407		215.608	2.09411	-1.75506	-7.3055	-13.049	-18.1546	-23.1113	-28.6051362595575*
213.937	0.15959	-4.59909	-8.3033	-13.2737	-19.4242	-22.7289		215.807	1.86582	-1.76826	-7.48432	-13.0019	-18.4341	-23.4298	-28.9540161748484*
214.137	0.123053	-4.74988	-8.34247	-13.2505	-19.5457	-23.1215		216.007	1.4281	-2.41813	-7.68419	-12.983	-18.8827	-23.3801	-29.4929889155321*
214.337	-0.122668	-4.90861	-8.56545	-13.4544	-19.6432	-23.4421		216.207	1.43939	-2.20428	-7.90469	-13.2506	-19.3468	-24.0263	-29.2675952617287*
214.537	-0.0628451	-5.10097	-8.97278	-13.5754	-19.6365	-23.9794		216.407	1.24109	-2.51372	-7.84501	-13.1639	-19.7394	-23.9688	-29.6325626697562*
214.737	-0.179454	-5.39956	-8.95338	-13.6231	-19.6692	-23.7777		216.607	1.51731	-1.99382	-7.91529	-13.7146	-18.9275	-24.6489	-29.441286963898*
214.937	-0.0757267	-5.47187	-9.15741	-13.5495	-19.7101	-24.2513		216.807	1.20058	-2.33851	-8.06155	-13.5384	-19.028	-24.6502	-29.5972463758828*
215.137	-0.122869	-5.53824	-9.56585	-13.6882	-19.7669	-24.1851		217.006	1.14065	-2.42136	-8.28232	-13.5913	-18.847	-24.7242	-30.307536870207*
215.336	-0.181165	-5.54244	-9.85171	-13.8333	-19.7737	-24.7591		217.206	0.957321	-2.39934	-8.41353	-13.6625	-19.8045	-25.0875	-29.95241100036*
215.536	-0.216945	-6.27855	-9.8653	-13.9299	-19.8471	-24.554		217.406	0.955718	-2.56694	-8.50744	-13.7085	-19.501	-24.7465	-30.1299761641296*
215.736	-0.30211	-5.06068	-9.60261	-14.1016	-19.7426	-25.0571		217.606	0.529713	-3.15149	-8.50684	-13.4717	-20.1384	-25.1597	-29.7519414862897*
215.936	-0.238992	-5.61618	-9.23263	-14.1411	-19.6693	-24.886		217.806	0.71434	-2.72306	-8.79683	-13.8524	-19.8547	-24.8868	-30.2622712802672*
216.136	-0.196844	-5.25427	-9.9288	-14.24	-19.7562	-24.9306		218.006	0.59042	-2.74955	-8.86465	-13.9334	-19.7552	-25.4438	-30.2628999058405*
216.335	-0.280341	-5.78201	-9.99181	-14.4704	-19.8659	-25.294		218.206	0.880061	-2.67773	-9.09612	-14.0686	-19.613	-25.6313	-30.4351753810038*
216.535	-0.191214	-5.41947	-10.202	-14.283	-19.8468	-24.8102		218.405	0.485285	-3.57987	-8.77602	-14.2857	-20.198	-25.2483	-30.0738562528906*
216.735	-0.142217	-5.95567	-10.3677	-14.4246	-19.9624	-24.3038		218.605	0.560895	-3.34422	-9.08045	-14.3773	-20.2519	-25.5074	-30.2047668007341*
216.935	-0.157982	-5.56692	-10.1815	-14.4327	-19.9601	-24.6822		218.805	0.32536	-4.10682	-8.52872	-14.3764	-19.2846	-24.9423	-30.4251710460847*
217.135	-0.239282	-5.9689	-10.1261	-14.4244	-20.0307	-25.3139		219.005	0.530941	-3.43991	-8.46012	-14.5267	-18.5675	-25.6633	-30.2559227078172*
217.335	-0.192828	-5.65556	-10.0481	-14.4893	-19.9792	-25.3895		219.205	0.943414	-2.55964	-8.80533	-14.4755	-19.2214	-25.9157	-30.3296106341859*
217.535	-0.328399	-5.36843	-9.87658	-14.5501	-20.0473	-25.1981		219.405	0.601431	-2.76841	-8.93375	-14.5184	-19.2574	-25.7652	-30.0264568839608*
217.734	-0.169814	-6.02365	-10.4449	-14.5431	-20.0379	-25.0204		219.604	0.405744	-3.16972	-8.90176	-14.324	-19.5256	-25.7044	-29.6097288237708*
217.934	-0.184327	-5.5729	-10.4903	-14.5026	-20.0511	-25.6063		219.804	0.520477	-2.81434	-9.1165	-14.4947	-19.757	-25.8307	-30.6948914452669*
218.134	-0.304688	-5.69448	-10.2469	-14.5526	-20.0557	-25.577		220.004	0.114758	-3.17269	-9.05157	-14.5105	-19.7113	-25.625	-30.0626474768315*
218.334	-0.240819	-5.66781	-10.3886	-14.6426	-19.9754	-25.0687		220.204	0.455529	-3.12924	-9.35509	-14.6113	-19.8005	-26.0993	-30.5247474747609*
218.534	-0.127601	-4.48292	-10.9135	-13.9294	-19.7566	-24.2863		220.404	0.126197	-3.36995	-9.35281	-14.592	-19.8911	-25.5023	-30.4704582421856*
218.734	-0.268107	-5.38428	-10.5554	-14.0009	-19.8685	-24.6209		220.604	0.070212	-3.56008	-9.55391	-14.6366	-20.3454	-25.6768	-30.360334595362*
218.933	-0.138624	-5.43802	-10.8914	-13.9866	-19.7861	-24.3647		220.803	-0.0857026	-3.73493	-9.5404	-14.7087	-20.4935	-25.5644	-30.2280471209824*
219.133	0.61029	-3.84124	-10.9146	-13.4586	-19.7821	-23.9805		221.003	-0.203416	-3.89379	-9.50251	-14.698	-20.3371	-25.6963	-29.9641962742855*
219.333	0.264162	-3.31824	-10.0927	-12.9484	-19.6396	-23.3083		221.203	-0.257948	-3.79441	-9.74285	-14.7148	-20.0766	-25.8946	-30.5599238971698*
219.533	0.109873	-4.18401	-10.0455	-12.8508	-19.7573	-23.8346		221.403	-0.376915	-3.96145	-9.78742	-14.6729	-20.2205	-25.4212	-30.1783380534242*
219.733	-0.0688888	-4.96889	-10.4146	-13.0765	-19.7029	-23.7304		221.603	-0.269176	-3.8799	-9.72268	-14.8103	-19.7387	-25.7543	-30.6041205507151*
219.933	0.0855896	-5.26846	-10.2448	-13.2524	-19.8018	-24.1088		221.803	-0.199836	-3.59958	-9.82753	-14.8344	-19.2499	-25.4587	-30.9479316605968*
220.132	-0.208159	-5.51955	-10.2066	-13.1851	-19.7081	-24.2536		222.002	-0.0512314	-3.56435	-9.77692	-15.0176	-20.1228	-25.7591	-31.0634980131344*
220.332	0.000844407	-5.43644	-10.5498	-13.2651	-19.7437	-24.5928		222.202	-0.277568	-3.72293	-9.90011	-15.0165	-19.5292	-25.7991	-30.389045999484*
220.532	0.0182421	-5.70571	-10.3517	-13.0755	-19.7857	-24.8599		222.402	-0.302953	-3.649	-9.98302	-14.9124	-20.3689	-25.3393	-30.3416905251764*
220.732	0.0159487	-6.65429	-10.634	-13.5893	-19.8447	-24.4166		222.602	-0.27101	-3.60228	-10.1267	-14.872	-20.3446	-25.7461	-30.1238374216195*
220.932	-0.208435	-5.79306	-10.3127	-13.6275	-19.8182	-25.8123		222.802	-0.179487	-3.57491	-10.0777	-15.0161	-19.9471	-25.5838	-30.415859018056*
221.132	-0.204514	-5.50624	-10.3582	-13.6722	-19.9119	-24.9689		223.002	-0.314724	-3.83477	-10.0639	-15.0106	-19.6911	-25.7558	-30.2483048302571*
221.332	-0.300393	-5.84122	-10.404	-13.8673	-19.9179	-24.7644		223.202	-0.393189	-3.94106	-10.1175	-14.9735	-20.0171	-25.5487	-30.6246632338839*
221.531	-0.195608	-5.39017	-10.4668	-14.0847	-19.9122	-25.1734		223.401	-0.320595	-4.04802	-10.2202	-15.0838	-20.095	-25.7644	-30.2523938531159*
221.731	-0.114319	-5.94203	-10.5206	-14.1335	-19.9813	-25.1342		223.601	-0.363217	-4.12394	-10.0435	-15.1477	-20.2591	-25.6961	-30.7959966804204*
221.931	-0.163137	-5.86714	-10.4813	-14.1309	-19.9845	-25.3113		223.801	-0.439094	-4.12245	-10.2481	-15.2269	-20.2967	-25.5403	-30.1995083842032*
222.131	-0.215134	-6.08	-10.689	-14.1893	-19.9721	-25.4622		224.001	-0.492754	-4.05138	-10.2495	-15.0537	-20.054	-26.0863	-30.4744699377307*
222.331	-0.207045	-5.97485	-10.9254	-14.2916	-20.0204	-25.3185		224.201	-0.508721	-3.98314	-10.0317	-15.1505	-20.3342	-25.9011	-30.5655576468352*
222.531	-0.00536319	-5.83338	-10.639	-14.3017	-19.9285	-25.0815		224.401	-0.373125	-3.95564	-10.2273	-15.151	-20.0133	-25.944	-30.5643602106401*
222.73	-0.0839187	-6.2079	-10.9193	-14.2889	-20.0122	-25.2632		224.6	-0.450076	-4.00915	-10.277	-15.2622	-20.1388	-25.9203	-30.4182416090493*
222.93	-0.157067	-5.63702	-10.6012	-14.4646	-20.099	-25.4435		224.8	-0.639189	-4.10984	-10.2368	-15.2135	-19.9179	-25.6184	-30.5529178151206*
223.13	-0.182319	-5.87106	-10.6158	-14.5134	-20.0705	-25.2031		225	-0.534417	-3.97503	-10.4524	-15.203	-20.6786	-25.6088	-30.2432899265342*
223.33	-0.10458	-5.7251	-10.7694	-14.5368	-20.0615	-25.3722		225.2	-0.513215	-4.26804	-10.4705	-15.3577	-20.4585	-25.6073	-30.7470903386078*
223.53	-0.151263	-5.54686	-10.9713	-14.483	-20.1036	-25.2054		225.4	-0.716089	-4.2506	-10.3654	-15.2375	-20.1304	-25.4734	-30.1228334629118*
223.73	-0.0973592	-5.60583	-10.7517	-14.4624	-20.0413	-25.0738		225.6	-0.634208	-4.21045	-10.2699	-15.2659	-20.0178	-25.8945	-29.700578410236*
223.929	-0.0900518	-5.80147	-10.7683	-14.5813	-20.1231	-25.3917		225.799	-0.0619654	-3.39015	-9.99747	-14.8857	-18.4093	-24.782	-27.8912145655581*
224.129	-0.11288	-6.20326	-10.7779	-14.4289	-20.0708	-24.9076		225.999	-0.131293	-2.62671	-9.93139	-14.9609	-19.1692	-24.9594	-28.6660820092377*
224.329	-0.104594	-5.56528	-10.8079	-14.4235	-19.8992	-26.075		226.199	-0.108401	-2.94682	-9.97699	-15.0383	-19.1827	-25.2713	-28.4342622282374*
224.529	-0.149644	-5.81965	-10.7668	-14.4039	-19.995	-25.6923		226.399	-0.250361	-3.02241	-9.9214	-15.0971	-19.4193	-25.7361	-28.9396514891731*
224.729	-0.191159	-5.75629	-10.7426	-14.5411	-19.9545	-25.4114		226.599	-0.36887	-3.12166	-10.004	-15.1197	-19.8137	-25.2966	-28.8422547810085*
224.929	-0.261707	-5.30594	-11.0192	-14.6627	-20.0579	-25.6418		226.799	-0.234267	-3.11859	-10.1413	-15.2267	-19.9407	-25.2924	-29.1085757350231*
225.129	-0.133673	-5.65638	-10.6559	-14.7566	-20.122	-25.5798		226.999	-0.390451	-3.06492	-10.2029	-15.3291	-19.9835	-25.5573	-29.4299223505587*
225.328	-0.327902	-5.48777	-11.2045	-14.9188	-20.1233	-25.6186		227.198	-0.280016	-3.10751	-10.3092	-15.3628	-20.2467	-25.1297	-29.6909898233444*
225.528	-0.28624	-3.66234	-10.6796	-14.1088	-19.5085	-24.3051		227.398	-0.379663	-3.19114	-10.1907	-15.3551	-19.5224	-25.641	-29.657583514118*
225.728	-0.291495	-3.02912	-10.4121	-13.4541	-19.5219	-24.2465		227.598	-0.313059	-3.22812	-10.3547	-15.3094	-19.8954	-26.0332	-29.7683894607678*
225.928	-0.117289	-4.24179	-9.9532	-13.4297	-19.8211	-24.7699		227.798	-0.179328	-3.19533	-10.4427	-15.3368	-19.6579	-26.0248	-30.1633544763198*
226.128	-0.136159	-4.72416	-10.2655	-13.5555	-19.9773	-24.4925		227.998	-0.12726	-3.03727	-10.5112	-15.2347	-20.0694	-25.7018	-30.2384026128787*
226.327	-0.198336	-5.28783	-10.0659	-13.8785	-19.9523	-24.5423		228.197	-0.0529995	-3.01048	-10.7728	-15.348	-19.6449	-26.048	-29.8592736625775*
226.527	-0.273116	-5.38356	-10.0383	-13.8896	-20.0327	-24.6117		228.397	-0.0176271	-2.99729	-10.6908	-15.4165	-19.4885	-25.7092	-30.4628221699635*
226.727	-0.405349	-5.18547	-10.3816	-14.083	-20.0202	-24.7308		228.597	-0.623017	-3.53885	-10.5031	-15.2437	-19.926	-25.2281	-30.5693812550615*
226.927	-0.269495	-5.81847	-10.651	-14.0252	-19.9742	-24.8694		228.797	-0.598922	-3.67653	-10.6271	-15.2991	-19.9636	-25.3474	-29.9611126202208*
227.127	-0.163437	-5.40227	-10.5345	-13.9686	-19.9134	-25.1657		228.997	0.421589	-3.08225	-10.361	-14.768	-17.6554	-23.7746	-29.3586804690671*
227.327	-0.537472	-5.97668	-10.4199	-14.2904	-19.9467	-24.8892		229.197	0.850177	-2.63101	-10.2296	-14.137	-17.7885	-23.0117	-27.1125708197735*
227.527	-0.330133	-5.52897	-10.6751	-14.0618	-20.0224	-25.0158		229.397	0.541248	-2.96724	-10.2455	-14.2793	-18.3587	-23.515	-27.51233483664*
227.726	-0.171309	-5.76667	-10.865	-14.1737	-20.126	-24.7798		229.596	0.620311	-2.9414	-10.3335	-14.5326	-19.1146	-23.9083	-27.5737600156647*
227.926	-0.35034	-5.70028	-10.6358	-14.3633	-20.0377	-25.0244		229.796	0.424751	-3.08343	-10.2256	-14.5457	-18.9751	-24.3939	-27.927600705559*
228.126	-0.248471	-5.57923	-10.7021	-14.4398	-20.0353	-25.1343		229.996	0.590022	-2.53236	-10.3197	-14.8454	-19.9734	-24.9241	-27.4334746227218*
228.326	-0.265532	-5.76168	-10.8717	-14.5464	-20.0923	-25.0774		230.196	0.331701	-3.06877	-10.4141	-14.644	-19.408	-24.7637	-29.1580577104558*
228.526	-0.402506	-5.90648	-10.5527	-14.4606	-19.8854	-25.2484		230.396	0.228365	-3.41966	-10.3066	-14.8794	-19.8929	-24.1074	-28.4231473366344*
228.726	-0.218377	-6.32073	-10.2152	-14.2853	-20.185	-25.2788		230.596	0.234071	-3.38705	-10.617	-14.8075	-19.4838	-24.7509	-29.1221939846885*
228.925	-0.254179	-5.7105	-10.9102	-14.4761	-20.1061	-25.4079		230.795	0.327688	-3.36319	-10.5042	-14.843	-19.955	-25.064	-28.9793549709292*
229.125	-0.286794	-6.00224	-10.8367	-14.361	-20.212	-25.3022		230.995	0.0217766	-3.72138	-10.6479	-14.8241	-20.0536	-24.6268	-29.1599465438081*
229.325	-0.179887	-6.08371	-10.8351	-14.5485	-20.2831	-25.4062		231.195	-0.11438	-3.85782	-10.6085	-14.7222	-20.297	-24.9656	-29.4685464339897*
229.525	-0.144908	-6.20611	-10.7861	-14.5992	-20.2967	-25.4886		231.395	-0.0667268	-3.80766	-10.6239	-14.9572	-19.8783	-24.6665	-29.6143925705166*
229.725	-0.0773065	-6.08646	-10.7129	-14.7704	-20.2661	-25.3034		231.595	-0.302149	-4.28871	-10.5551	-14.9276	-20.2229	-24.8163	-29.5111647006036*
229.925	-0.171242	-6.24521	-10.4983	-14.7245	-20.2895	-25.4777		231.795	-0.301986	-4.47838	-10.6307	-14.8171	-20.0921	-25.3502	-29.6485755643785*
230.125	-0.0595485	-5.92506	-10.7131	-14.6766	-20.3007	-25.7842		231.994	-0.200491	-4.13819	-10.6075	-14.8876	-20.0602	-24.6659	-29.9078735153081*
230.324	-0.0164783	-5.56522	-10.4889	-14.6405	-20.3032	-25.642		232.194	-0.113378	-4.21567	-10.5282	-15.1867	-20.2723	-25.044	-30.0832647353713*
230.524	-0.113686	-5.91243	-10.3743	-14.7244	-20.2272	-25.3834		232.394	-0.120776	-4.24283	-10.3794	-15.2086	-20.175	-25.3678	-29.9352458377911*
230.724	-0.200195	-6.13835	-10.4407	-14.7095	-20.2613	-25.3785		232.594	-0.221987	-3.99607	-10.4715	-15.2803	-19.4229	-25.022	-30.0795550257294*
230.924	-0.374128	-5.82417	-10.6159	-14.8078	-20.2664	-25.478		232.794	-0.242442	-4.13866	-10.4651	-15.2649	-20.113	-25.4216	-29.9900318278522*
231.124	-0.430749	-5.64946	-10.9187	-14.6966	-20.2437	-25.4578		232.994	-0.188802	-4.20636	-10.4213	-15.2797	-19.5494	-25.4086	-30.5987039998278*
231.323	-0.30949	-6.06274	-11.115	-14.542	-20.3131	-25.1968		233.194	-0.254545	-4.08755	-10.3158	-15.2666	-19.8198	-25.5003	-30.2238240716945*
231.523	-0.23389	-5.87285	-10.9496	-14.7316	-20.382	-25.3454		233.393	-0.309474	-4.17473	-10.3575	-15.3434	-19.8043	-25.364	-30.1662321213237*
231.723	-0.305731	-5.61205	-11.0458	-14.7076	-20.3434	-25.3265		233.593	-0.24651	-4.01775	-10.4934	-15.2805	-19.7605	-25.5024	-30.595976619989*
231.923	-0.0486616	-5.33679	-10.5254	-14.6436	-20.2687	-25.1792		233.793	-0.362313	-4.14696	-10.5047	-15.313	-19.989	-25.4697	-30.1933462160657*
232.123	-0.104837	-5.44463	-10.5826	-14.7966	-20.2587	-25.2316		233.993	0.900115	-3.20394	-9.12478	-14.1839	-16.4296	-23.0077	-27.9602057673561*
232.323	-0.204877	-5.74867	-10.6703	-14.8228	-20.3477	-25.3912		234.193	1.73804	-2.55021	-8.51803	-13.6124	-15.9806	-21.6858	-27.8279446752365*
232.523	-0.177865	-6.19849	-10.5815	-14.8493	-20.4018	-25.2622		234.393	1.72479	-2.26461	-8.82792	-13.8317	-17.1229	-22.6999	-27.8526784988046*
232.722	-0.262337	-5.86152	-10.7142	-14.8194	-20.3594	-25.5145		234.592	1.52553	-2.46696	-8.80429	-14.1779	-17.6183	-23.1059	-28.2594488251537*
232.922	-0.393484	-6.21121	-11.0151	-14.8614	-20.3143	-25.8379		234.792	1.15179	-2.58298	-8.88265	-14.0593	-18.0735	-23.146	-28.3700291579944*
233.122	-0.35018	-5.52872	-10.8701	-15.0707	-20.3678	-25.7733		234.992	1.05068	-2.7941	-8.77229	-14.2326	-18.816	-23.5992	-28.1044253010972*
233.322	-0.105641	-5.80031	-11.1937	-15.0029	-20.3884	-25.3779		235.192	0.782583	-2.89059	-8.88739	-14.2397	-19.3516	-23.3918	-29.8056000463921*
233.522	-0.194689	-6.21523	-10.9221	-15.0348	-20.4415	-25.2331		235.392	1.07078	-2.81565	-8.82039	-14.5001	-19.1892	-24.5153	-28.6166018532712*
233.722	-0.381726	-6.06891	-11.2186	-15.0489	-20.4132	-25.6541		235.592	0.884398	-2.91872	-8.98805	-14.5503	-19.3184	-24.2798	-29.1425961140931*
233.921	-0.218748	-6.20915	-10.9774	-15.1248	-20.4425	-25.3772		235.791	0.996697	-2.94331	-9.07813	-14.6189	-19.939	-24.9209	-28.9727725970721*
234.121	-0.117327	-5.86093	-10.7348	-14.996	-20.451	-25.408		235.991	0.752089	-2.81583	-8.90675	-14.7038	-19.514	-24.505	-28.8504157692303*
234.321	-0.142557	-6.05337	-10.67	-15.0196	-20.4461	-25.4513		236.191	0.737645	-2.81504	-9.02154	-14.7617	-19.0383	-24.6644	-29.5732553493922*
234.521	-0.0427922	-5.76358	-11.1094	-15.0903	-20.3908	-25.4661		236.391	0.685869	-2.99782	-9.11235	-14.6355	-19.3583	-24.895	-29.6272452797769*
234.721	-0.122307	-6.0194	-11.1641	-15.054	-20.4847	-25.7733		236.591	0.421602	-3.06676	-9.08651	-14.6404	-19.6696	-24.6832	-29.7114608650314*
234.921	-0.115876	-5.92006	-11.0123	-15.1334	-20.4532	-25.6556		236.791	0.697205	-3.08052	-9.07808	-14.8731	-19.4761	-25.3579	-30.8524231034848*
235.12	-0.218979	-5.89413	-10.5218	-15.2393	-20.4485	-25.6783		236.99	0.383097	-3.24227	-9.26928	-14.6871	-19.7055	-25.6087	-29.2736918381095*
235.32	-0.365631	-5.20293	-10.9574	-15.2262	-20.4718	-25.9296		237.19	0.346674	-3.0387	-9.32592	-14.8402	-20.0772	-24.8749	-30.1237000974078*
235.52	-0.212079	-5.98712	-10.8386	-15.3446	-20.4448	-25.1333		237.39	-0.250058	-3.97834	-9.37278	-14.5443	-20.1925	-24.4986	-29.8953660497598*
235.72	-0.0636126	-6.21156	-11.3839	-15.3878	-20.4205	-25.3159		237.59	-0.731622	-4.46758	-9.49398	-14.3426	-20.5548	-24.7221	-29.6519411219881*
235.92	-0.138447	-5.94323	-10.9272	-15.3474	-20.3977	-25.6133		237.79	-0.694136	-4.32348	-9.49366	-14.4796	-20.1972	-24.6932	-30.2982291634105*
236.12	-0.212557	-5.51541	-11.0398	-15.3727	-20.5168	-25.5103		237.99	-0.781289	-4.71594	-9.41867	-14.614	-21.6268	-24.6789	-29.4289332432439*
236.32	-0.179178	-5.87422	-11.1334	-15.5065	-20.5543	-25.6205		238.19	-0.653862	-4.79239	-9.51528	-14.571	-21.6047	-24.8272	-30.1691347839878*
236.519	-0.227912	-5.7476	-10.9774	-15.4823	-20.5772	-25.5438		238.389	-0.279472	-4.45033	-9.92066	-14.9039	-20.3647	-25.4491	-29.9784307680567*
236.719	-0.0917362	-5.48905	-11.0116	-15.3483	-20.4918	-25.9414		238.589	0.275558	-3.32459	-9.96265	-15.0223	-19.3228	-25.8317	-30.8381503008527*
236.919	-0.194906	-6.29659	-11.0802	-15.3776	-20.5909	-25.4758		238.789	0.0197173	-3.80485	-9.91977	-15.0717	-19.6371	-25.2955	-30.2393198512785*
237.119	-0.272961	-5.64588	-10.6634	-15.2976	-20.5941	-25.9467		238.989	0.158725	-3.59248	-9.8472	-15.0417	-19.5954	-26.0073	-30.2275968030971*
237.319	-0.320963	-5.36778	-10.8904	-15.5527	-20.4718	-25.4382		239.189	0.0948664	-3.67728	-9.85762	-14.9988	-19.9512	-25.8702	-29.8751107512779*
237.519	-0.406215	-5.22815	-11.1073	-15.3822	-20.486	-26.1381		239.389	-0.00310894	-3.6751	-9.91517	-15.1078	-19.6651	-25.6304	-30.4411291292877*
237.718	-0.344871	-5.89328	-11.201	-15.5244	-20.4786	-25.7785		239.588	0.949559	-3.79848	-9.92259	-14.4632	-20.4792	-24.0386	-30.6729223005947*
237.918	-0.355457	-5.44829	-11.188	-15.3977	-20.4317	-25.5625		239.788	0.586383	-3.61965	-9.88915	-14.5823	-20.3094	-24.5985	-30.3740924890586*
238.118	-0.209819	-5.81102	-11.0691	-15.3979	-20.5196	-25.2697		239.988	0.606781	-3.5874	-9.99257	-14.5304	-19.8103	-24.8412	-30.5876091223531*
238.318	-0.0124681	-3.44651	-10.9066	-15.0039	-19.8585	-24.4505		240.188	0.426245	-3.79466	-9.66687	-14.6457	-20.1278	-24.7983	-30.5705293382358*
238.518	-0.12187	-4.06175	-11.0853	-14.9591	-20.0656	-24.7137		240.388	1.11533	-3.69461	-9.58502	-14.1058	-20.0167	-23.57	-30.054180636341*
238.718	-0.0423636	-4.80573	-10.996	-15.1298	-20.1813	-25.1064		240.588	1.03593	-3.72229	-9.65851	-14.304	-20.6205	-23.9238	-30.2987320183825*
238.917	-0.0757623	-4.94134	-11.0791	-15.2371	-20.2738	-25.0234		240.787	0.976334	-3.66537	-9.5554	-14.3865	-20.4724	-24.1386	-30.22083111802*
239.117	-0.223738	-4.75746	-10.8281	-15.33	-20.3468	-25.8282		240.987	0.860823	-3.6975	-9.67188	-14.4226	-20.1124	-24.2636	-30.3020595946351*
239.317	-0.189502	-5.21818	-10.7818	-15.1333	-20.3087	-25.184		241.187	0.720959	-3.59226	-9.59612	-14.4585	-20.5525	-24.2625	-30.5898984657035*
239.517	-0.0590352	-5.2052	-10.968	-15.171	-20.3694	-25.0891		241.387	-0.0427398	-4.21919	-9.77289	-14.0918	-20.8277	-23.8637	-30.0513690607036*
239.717	-0.0543793	-5.08786	-10.7261	-15.2465	-20.289	-24.9531		241.587	0.416133	-4.1049	-9.79158	-14.5879	-20.4258	-24.7185	-30.4609176437152*
239.917	0.112313	-2.70677	-10.0952	-14.13	-18.9416	-23.4782		241.787	0.869184	-3.57124	-10.0935	-14.8854	-19.9511	-25.5778	-30.489884910272*
240.117	-0.0428391	-2.99598	-10.1504	-14.0678	-19.2856	-23.6361		241.987	0.464163	-3.73992	-10.0018	-14.5963	-20.5332	-25.0294	-29.8577859078063*
240.316	-0.120894	-3.77366	-10.3977	-14.249	-19.429	-24.0079		242.186	0.260649	-3.86493	-10.0526	-14.7817	-20.3608	-24.9489	-30.5891686323226*
240.516	-0.170282	-4.34852	-10.3693	-14.3197	-19.6159	-23.9961		242.386	0.165145	-4.13493	-10.0305	-14.8732	-20.4549	-25.1699	-30.2711666505354*
240.716	-0.0278953	-4.36673	-10.3257	-14.4899	-19.6815	-23.9941		242.586	0.175262	-3.96801	-9.98687	-14.805	-20.2253	-25.089	-30.0901927850638*
240.916	-0.107616	-4.7845	-10.6762	-14.436	-19.6527	-24.638		242.786	0.183934	-3.9166	-10.0349	-14.9516	-20.1731	-25.2564	-30.1646339476973*
241.116	-0.106056	-5.1647	-10.6037	-14.4521	-19.8169	-24.216		242.986	0.18938	-4.02224	-9.83065	-14.8029	-20.3791	-25.575	-30.3687280203913*
241.315	-0.143348	-4.94548	-10.1936	-14.5471	-19.5535	-25.1771		243.185	1.11821	-4.0531	-9.41176	-13.9555	-20.4904	-23.6201	-29.6368033906096*
241.515	-0.266431	-5.45221	-10.3035	-14.5887	-19.676	-25.0117		243.385	1.02336	-4.11066	-9.59379	-14.2443	-20.3137	-23.5685	-30.4190967581649*
241.715	-0.130582	-5.02641	-10.5484	-14.5982	-19.7193	-24.5763		243.585	1.17772	-4.08897	-9.43166	-13.9828	-20.3321	-23.537	-30.3349157427683*
241.915	-0.164338	-5.21559	-10.1127	-14.8492	-19.8532	-24.9222		243.785	1.25456	-3.94271	-9.66698	-14.289	-19.7353	-24.3114	-30.0459454138981*
242.115	-0.31516	-4.8721	-10.1728	-14.7874	-19.7258	-25.4819		243.985	1.25766	-3.94502	-9.94305	-14.3345	-19.7272	-24.6549	-30.4200560717206*
242.315	0.158839	-5.45159	-10.2326	-14.5303	-19.6912	-23.797		244.185	0.990423	-4.18646	-9.78783	-14.3499	-20.277	-24.588	-30.4781018197059*
242.515	-0.0867104	-5.41652	-10.0158	-14.5769	-19.6906	-24.4074		244.385	1.10801	-4.2579	-10.0077	-14.3499	-20.3979	-25.1456	-30.2957983565629*
242.714	-0.115822	-4.7632	-10.334	-14.8582	-19.5321	-24.4498		244.584	0.866582	-4.15453	-9.90359	-14.4208	-20.1327	-24.8457	-30.5062546477034*
242.914	-0.118864	-5.16289	-10.8899	-14.973	-19.6699	-25.2707		244.784	0.684369	-4.18924	-10.0635	-14.4878	-20.2231	-24.9375	-30.8646583314024*
243.114	-0.262098	-4.49477	-10.9933	-14.9785	-19.629	-24.5508		244.984	0.637306	-4.22091	-10.085	-14.4528	-20.2347	-24.6266	-31.0748796839694*
243.314	-0.116136	-5.34419	-11.1113	-14.7768	-19.7558	-24.7947		245.184	0.583814	-4.33581	-10.0934	-14.5908	-19.9276	-25.0773	-30.8644816157474*
243.514	-0.32493	-5.0369	-11.4596	-14.9526	-19.6966	-25.0965		245.384	0.54773	-4.29115	-10.1479	-14.5854	-20.177	-25.3586	-30.5484903715481*
243.714	-0.150918	-5.37189	-11.1205	-15.067	-19.7983	-24.9242		245.584	0.600632	-4.29854	-10.1446	-14.79	-20.2991	-25.2636	-30.7422184904151*
243.913	-0.191933	-5.53322	-11.2287	-15.04	-19.7243	-25.1826		245.783	0.589996	-4.348	-10.2454	-14.6922	-19.9131	-25.4235	-30.4784461536849*
244.113	-0.0209483	-5.37892	-11.0029	-14.9982	-19.8735	-24.7515		245.983	0.332196	-4.40847	-10.058	-14.7198	-20.38	-25.0997	-30.7076195210924*
244.313	-0.100744	-5.58902	-10.6255	-14.9882	-19.8116	-25.2571		246.183	0.433207	-4.3603	-10.1853	-14.618	-20.054	-25.3094	-30.6231448893372*
244.513	-0.0921154	-5.88456	-11.0301	-15.035	-19.8218	-25.1526		246.383	0.414374	-4.44866	-9.97437	-14.7218	-20.0506	-25.1645	-30.4946275763642*
244.713	-0.102964	-6.03087	-11.1022	-15.065	-19.8827	-24.9489		246.583	1.25763	-4.06859	-9.84697	-13.7971	-20.0674	-23.333	-28.5188512589301*
244.913	-0.216995	-6.02144	-10.6878	-15.2742	-19.9447	-25.2309		246.783	1.82074	-3.89902	-10.0567	-13.5806	-19.9155	-23.1336	-28.9951233747804*
245.113	-0.224901	-5.51249	-10.9141	-15.2421	-19.9087	-24.8988		246.982	1.73139	-3.89846	-10.1129	-13.6826	-20.1503	-23.4944	-29.4933764618334*
245.312	-0.40691	-5.46787	-11.0618	-15.3545	-19.8655	-25.3008		247.182	1.68565	-4.03493	-10.194	-13.8429	-20.9963	-23.7904	-28.779019687978*
245.512	-0.304629	-5.42274	-10.7106	-15.2256	-19.9943	-25.1274		247.382	1.58843	-4.11852	-9.97906	-13.984	-19.9693	-24.2021	-29.75749017591*
245.712	-0.0775795	-5.65496	-10.9789	-15.1737	-20.0345	-25.4027		247.582	1.44402	-4.1185	-10.107	-13.955	-20.2303	-24.2531	-29.7827458223853*
245.912	-0.280297	-5.67906	-11.0595	-15.3107	-20.0048	-25.1511		247.782	1.21764	-4.25023	-10.0773	-14.0969	-19.9416	-24.7931	-29.5665874606235*
246.112	-0.332373	-5.62734	-11.2533	-15.2263	-20.0749	-25.0986		247.982	1.22086	-4.29512	-10.0125	-14.1539	-20.4255	-24.692	-29.6974839530906*
246.311	-0.124803	-5.41978	-11.1783	-15.2548	-20.0507	-25.5178		248.181	1.07192	-4.18924	-10.1763	-14.1296	-19.928	-24.7315	-29.7392279661938*
246.511	-0.173022	-5.89058	-11.021	-15.2083	-20.1007	-25.3249		248.381	1.06826	-4.1786	-10.3912	-14.2743	-19.9928	-25.0745	-29.839352872957*
246.711	-0.205458	-5.77036	-10.5068	-15.1816	-19.9333	-25.7603		248.581	0.890287	-4.21252	-10.4445	-14.3176	-19.781	-25.0356	-30.0757400372242*
246.911	-0.410187	-5.13326	-10.965	-15.4411	-19.8672	-25.3473		248.781	0.754164	-4.38985	-10.3807	-14.4279	-20.1766	-25.247	-30.1026669543806*
247.111	-0.264335	-5.11754	-11.015	-15.2808	-20.0446	-25.5442		248.981	0.743356	-4.42173	-10.3659	-14.4051	-20.3099	-24.8236	-29.9871036335285*
247.311	-0.0768579	-5.85562	-10.9865	-15.3861	-20.0645	-25.0375		249.181	0.692797	-4.47186	-10.4617	-14.5502	-20.0818	-25.6932	-30.2940523513075*
247.511	-0.0723038	-5.13202	-11.0159	-15.3818	-20.1094	-25.1992		249.381	0.391927	-4.42353	-10.5365	-14.434	-20.4049	-25.3966	-30.0456594620409*
247.71	-0.151331	-5.81575	-10.8647	-15.4152	-20.1262	-25.3696		249.58	0.00557082	-4.80182	-10.7629	-14.2323	-20.8481	-25.0785	-29.6228080565735*
247.91	-0.0504147	-5.97385	-10.9003	-15.3078	-20.1504	-25.7178		249.78	0.240278	-4.91475	-10.7043	-14.3665	-19.8879	-25.5181	-29.9133400332861*
248.11	-0.0631166	-5.45191	-11.2297	-15.4925	-20.2727	-25.4503		249.98	0.107359	-5.24205	-10.4922	-14.3942	-20.299	-25.0954	-29.243051799812*
248.31	-0.112558	-5.55297	-10.9768	-15.502	-20.1552	-25.52		250.18	-0.247485	-5.31501	-10.7229	-14.4447	-20.3806	-24.8989	-29.706168947579*
248.51	-0.0434018	-5.92868	-10.8204	-15.412	-20.2597	-25.6264		250.38	-0.201742	-5.48578	-10.6381	-14.5108	-20.1518	-25.1008	-28.9079693516076*
248.71	-0.377723	-5.33776	-11.4635	-15.6272	-20.2359	-25.1774		250.58	-0.262271	-5.52081	-10.7011	-14.4006	-20.234	-25.0123	-29.8289747741931*
248.909	-0.280981	-5.20124	-10.875	-15.5154	-20.143	-25.4719		250.779	0.0218906	-5.35149	-10.6783	-14.7073	-20.6202	-25.392	-30.0198708370563*
249.109	-0.258737	-5.66191	-11.2097	-15.4728	-20.2891	-25.4422		250.979	-0.00972878	-5.23747	-10.6924	-14.8311	-20.8271	-25.7825	-30.6843160253933*
249.309	-0.211984	-5.61104	-11.4419	-15.5738	-20.2346	-25.2885		251.179	0.216227	-5.05148	-10.7564	-14.9916	-19.7669	-25.9758	-29.9989077994265*
249.509	-0.215177	-5.40847	-11.1641	-15.7111	-20.3323	-25.3185		251.379	-0.0322711	-5.09228	-10.6754	-15.0303	-20.3026	-26.0473	-29.5285717612042*
249.709	-0.339838	-5.97943	-10.7812	-15.724	-20.2442	-25.5836		251.579	0.116907	-4.91287	-10.7054	-15.0552	-19.8172	-25.8811	-30.3638993845209*
249.909	-0.130102	-4.96108	-10.8117	-15.5823	-20.2105	-25.2876		251.779	0.0450112	-4.98705	-10.6507	-15.1041	-19.2263	-25.8045	-30.1790074577837*
250.108	-0.035164	-5.42975	-11.1513	-15.4743	-20.3255	-25.4966		251.978	-0.427869	-5.66504	-10.6841	-14.9014	-20.2296	-25.4675	-30.2239692650975*
250.308	-0.245794	-5.18002	-10.2666	-15.4814	-20.2981	-25.723		252.178	-0.450126	-5.49877	-10.642	-14.8494	-20.5071	-25.4896	-29.720313705277*
250.508	-0.218286	-5.61918	-10.6131	-15.4504	-20.3017	-25.4291		252.378	-0.269107	-4.57792	-10.7729	-14.8213	-19.6536	-26.1277	-29.6438515478148*
250.708	-0.0250103	-5.46298	-10.7937	-15.5017	-20.3588	-25.3832		252.578	-0.194869	-5.30617	-10.5986	-14.9357	-20.9598	-25.454	-29.8145235728998*
250.908	-0.171623	-5.48025	-11.1654	-15.6676	-20.1953	-25.4373		252.778	-0.139907	-5.11882	-10.7816	-14.8999	-19.7628	-25.5177	-29.9206128718241*
251.108	-0.144293	-5.4474	-10.9253	-15.6358	-20.2843	-25.1429		252.978	-0.275635	-5.11763	-10.6633	-14.9433	-19.8882	-25.6246	-29.7078999422382*
251.308	-0.210663	-4.92177	-10.8015	-15.4752	-20.3285	-25.6533		253.178	-0.304109	-5.04577	-10.7347	-15.1018	-19.9566	-25.6095	-29.7163163380283*
251.507	-0.0758093	-5.57542	-10.9443	-15.5092	-20.3597	-24.9888		253.377	-0.342533	-5.20781	-10.8411	-15.1482	-19.8433	-25.6529	-30.4689271613755*
251.707	-0.121155	-5.31945	-10.5577	-15.4934	-20.3921	-25.2893		253.577	-0.327257	-5.12546	-10.5831	-15.1809	-19.4579	-25.6984	-30.2153094702161*
251.907	-0.277789	-5.73487	-10.3671	-15.5222	-20.2954	-25.6753		253.777	-0.44373	-5.02804	-10.8069	-15.0968	-19.6384	-25.4184	-29.9319454170716*
252.107	-0.189099	-5.42518	-10.3422	-15.5145	-20.1645	-26.1247		253.977	-0.253543	-5.34166	-10.8099	-15.281	-20.377	-25.7545	-30.1824500243004*
252.307	-0.43275	-5.11011	-10.6338	-15.6661	-20.2252	-25.4527		254.177	-0.405472	-5.06656	-10.7678	-15.0921	-20.3629	-25.0513	-30.7646320397075*
252.507	-0.271532	-5.16113	-10.8994	-15.4471	-20.3526	-25.5776		254.377	-0.49673	-5.06386	-10.9438	-15.0427	-19.6292	-25.9192	-30.4580640384085*
252.706	-0.188634	-5.57506	-10.9467	-15.4527	-20.3741	-25.4081		254.576	-0.363432	-5.19189	-10.8298	-15.3434	-19.4856	-25.7266	-29.8198168549518*
252.906	-0.281673	-5.71657	-10.8201	-15.3602	-20.3459	-25.2752		254.776	-0.481126	-5.1166	-10.8973	-15.2243	-19.7348	-25.5925	-30.0932541506675*
253.106	-0.0775503	-5.63717	-10.9242	-15.5077	-20.3748	-25.4064		254.976	-0.291933	-5.14225	-10.9922	-15.3574	-19.3662	-25.7103	-30.6417298268712*
253.306	0.0133486	-5.66982	-10.6705	-15.4463	-20.4612	-25.7259		255.176	-0.444734	-5.10661	-10.9775	-15.2375	-19.9627	-25.6997	-29.968199873206*
253.506	-0.208519	-5.70107	-10.5104	-15.5736	-20.3265	-25.1532		255.376	-0.448706	-5.12647	-10.9973	-15.3784	-20.4756	-25.5785	-30.4788935149376*
253.706	-0.200376	-5.37478	-10.8424	-15.6161	-20.4516	-25.257		255.576	-0.455685	-5.22444	-11.183	-15.3272	-20.0099	-25.8043	-30.8196422357658*
253.905	-0.1953	-5.31238	-11.1536	-15.5816	-20.3544	-25.2284		255.775	-0.444864	-5.31138	-10.8946	-15.4506	-19.6675	-25.6716	-31.0494198933861*
254.105	-0.122768	-5.04804	-10.9223	-15.6604	-20.4379	-25.085		255.975	-0.652568	-5.31394	-11.0315	-15.3283	-19.8198	-25.2639	-30.6632666208869*
254.305	-0.244704	-5.32871	-10.931	-15.6469	-20.4174	-25.2519		256.175	-0.304001	-5.24199	-11.0327	-15.4593	-20.1118	-25.8232	-30.2467180282945*
254.505	-0.376297	-3.93016	-11.0457	-15.5205	-20.1398	-25.1049		256.375	-0.563257	-5.34484	-11.1117	-15.3512	-20.0895	-25.6107	-30.6256389226355*
254.705	-0.294187	-3.90927	-10.9394	-15.469	-20.159	-24.8126		256.575	-0.705347	-5.34073	-10.9819	-15.3467	-19.5661	-25.4745	-31.0002397219098*
254.905	-0.0580725	-4.71294	-11.0435	-15.4584	-20.2473	-25.1305		256.775	-0.643054	-5.21012	-10.9672	-15.4097	-19.5331	-25.4347	-30.7281178547725*
255.105	-0.0134728	-4.69463	-10.976	-15.3366	-20.3142	-25.3285		256.974	-0.702437	-5.28688	-11.0176	-15.3195	-20.3665	-25.6388	-30.8597109753622*
255.304	-0.257546	-4.8457	-10.8547	-15.4353	-20.3497	-25.366		257.174	-0.532274	-5.33053	-11.0206	-15.3467	-20.4862	-25.6003	-30.4298491211268*
255.504	-0.307242	-5.13741	-10.7875	-15.4515	-20.3098	-24.9671		257.374	-0.527037	-5.34558	-11.0581	-15.3349	-20.5131	-25.5807	-30.6208264345276*
255.704	0.0823271	-5.65339	-10.5855	-15.422	-20.3437	-24.8963		257.574	-0.597849	-5.02517	-11.395	-15.3168	-20.1551	-25.4773	-30.4746607542488*
255.904	-0.0589452	-5.64049	-10.7178	-15.3595	-20.4275	-25.2747		257.774	-0.976959	-5.62176	-11.3365	-15.0411	-20.3041	-25.4669	-30.4370414710286*
256.104	-0.307749	-5.98834	-10.9148	-15.4195	-20.4188	-25.3563		257.974	-0.742626	-5.81646	-11.3997	-15.4041	-20.4048	-25.517	-30.231642158767*
256.303	-0.316645	-5.28386	-10.4135	-15.3941	-20.2854	-25.64		258.173	-0.840261	-6.00931	-11.3592	-15.4988	-20.3016	-25.6031	-30.0409408811325*
256.503	-0.24197	-5.52975	-11.0585	-15.5098	-20.3163	-25.3111		258.373	-0.819965	-5.92084	-11.3234	-15.4643	-20.8389	-25.7555	-29.88652992586*
256.703	-0.225115	-5.64047	-11.1047	-15.4417	-20.3555	-25.3831		258.573	-1.10692	-6.16447	-11.2463	-15.3772	-20.8888	-25.6818	-29.5542492054321*
256.903	-0.125616	-5.88417	-10.9608	-15.4569	-20.4017	-25.0571		258.773	-1.37716	-6.30563	-11.0929	-15.329	-21.5138	-25.5061	-29.5677134827701*
257.103	-0.0796592	-5.76978	-11.1236	-15.5098	-20.41	-25.0695		258.973	-1.32952	-6.46991	-11.1703	-15.491	-21.4509	-25.1332	-29.6555477588697*
257.303	-0.213671	-5.35991	-10.9636	-15.3844	-20.5056	-25.218		259.173	-1.4451	-6.52707	-11.1657	-15.3474	-21.6267	-25.1066	-29.40270336359*
257.503	-0.212772	-5.31689	-11.0183	-15.4705	-20.4329	-25.1329		259.373	-0.49563	-5.82179	-11.0862	-15.5949	-19.611	-26.3648	-29.357037945952*
257.702	-0.203954	-5.17552	-10.9794	-15.3224	-20.3377	-24.9918		259.572	-0.952464	-6.16865	-10.9479	-15.5497	-20.478	-25.4432	-29.5263592903009*
257.902	-0.147812	-5.2665	-10.671	-15.4026	-20.4374	-25.1317		259.772	-1.30373	-6.50173	-11.1106	-15.2324	-21.0451	-25.2101	-29.5337294930241*
258.102	-0.287016	-5.33415	-10.8214	-15.5913	-20.3519	-25.4539		259.972	-0.455499	-5.70186	-10.8985	-15.1727	-19.9624	-25.0503	-28.0541957524882*
258.302	-0.275027	-5.67555	-10.894	-15.5524	-20.4352	-25.4148		260.172	-1.09087	-6.17078	-11.0447	-15.0547	-20.7844	-25.0988	-27.1817810398157*
258.502	-0.260294	-5.55372	-10.8785	-15.4649	-20.4047	-25.1136		260.372	-0.794544	-5.96115	-11.0227	-15.2256	-20.9074	-25.3925	-28.1739905444824*
258.702	-0.291032	-5.27517	-10.9916	-15.5141	-20.4712	-25.2868		260.572	-0.754583	-6.01712	-10.9959	-15.3424	-20.7974	-25.5956	-28.3588810611332*
258.901	-0.179678	-5.2174	-11.2966	-15.4982	-20.4997	-25.3255		260.771	-0.872559	-6.11146	-11.0572	-15.3592	-20.7643	-25.4382	-28.5995109249234*
259.101	-0.245539	-5.4228	-11.0982	-15.6058	-20.4786	-25.479		260.971	-1.3502	-6.47889	-11.1198	-15.2379	-21.2991	-25.5256	-27.6521562657011*
259.301	-0.0898828	-5.42929	-11.1072	-15.518	-20.4339	-25.5806		261.171	-0.888863	-5.99943	-10.9431	-15.3233	-20.626	-25.4228	-28.8677805272417*
259.501	-0.17115	-6.05006	-10.6883	-15.5987	-20.4223	-25.5479		261.371	-1.09095	-6.18317	-11.0682	-15.3584	-21.0121	-25.3093	-28.8169899007422*
259.701	-0.202188	-5.46013	-10.6174	-15.705	-20.3688	-25.5343		261.571	-1.16593	-6.37046	-10.9724	-15.318	-21.3114	-25.5113	-28.8310166205703*
259.901	-0.0995928	-5.52348	-11.0022	-15.5647	-20.4825	-25.3302		261.771	-0.551306	-5.49388	-11.0723	-15.6608	-20.2729	-25.6057	-28.9852172910364*
260.101	-0.203935	-5.82659	-10.7892	-15.5844	-20.5542	-25.0893		261.971	-0.627173	-6.06472	-11.0811	-15.7894	-19.7773	-25.5817	-29.1559989844467*
260.3	-0.181027	-5.47838	-11.0097	-15.5882	-20.5276	-25.3558		262.17	-0.786136	-6.14037	-11.0244	-15.755	-20.5516	-25.6257	-28.8817806373766*
260.5	-0.160328	-5.56013	-10.9362	-15.4403	-20.5997	-25.6344		262.37	-0.778127	-6.09912	-11.178	-15.6769	-20.101	-25.7384	-29.2424686608938*
260.7	-0.11259	-6.02349	-10.9786	-15.5382	-20.5145	-25.3544		262.57	-0.60719	-5.65928	-11.1114	-15.743	-19.8718	-25.8341	-28.9303199018827*
260.9	-0.157829	-5.89489	-11.2008	-15.6741	-20.5473	-25.1655		262.77	-0.600653	-5.76504	-10.9779	-15.6876	-20.7066	-25.8266	-29.6315499093808*
261.1	-0.272302	-5.85609	-10.9662	-15.573	-20.5731	-25.5584		262.97	-0.520499	-5.56154	-11.1076	-15.6524	-20.4455	-25.6895	-28.9804482426841*
261.3	-0.298385	-5.67727	-10.5933	-15.684	-20.3773	-25.5608		263.17	-0.44344	-5.02064	-11.3199	-15.6968	-20.1365	-26.1624	-29.7286648277171*
261.499	-0.242513	-5.2645	-11.2058	-15.7552	-20.4491	-25.4461		263.369	-0.541735	-5.51942	-11.2345	-15.4603	-20.2275	-25.8028	-29.4408004841219*
261.699	-0.335829	-5.22498	-11.337	-15.5475	-20.4595	-25.1967		263.569	-0.627147	-5.62302	-11.2518	-15.4403	-19.7507	-25.9282	-28.9611152771073*
261.899	-0.193124	-5.26592	-10.8921	-15.7002	-20.4919	-25.018		263.769	-0.795739	-5.82696	-11.1873	-15.1775	-21.1926	-25.4063	-29.3727967976057*
262.099	-0.290294	-5.45936	-11.201	-15.7773	-20.4994	-25.0448		263.969	-1.10725	-6.12858	-10.9834	-15.1928	-20.4954	-24.6326	-29.5356142325775*
262.299	-0.323157	-5.38276	-11.0814	-15.7313	-20.5297	-25.5507		264.169	-0.782994	-5.50656	-11.3459	-15.599	-20.3434	-25.6882	-29.5442348634489*
262.499	-0.246487	-5.89231	-11.2498	-15.7633	-20.6026	-25.2749		264.369	-1.00614	-6.05303	-11.0294	-15.3729	-20.7219	-25.5136	-29.8997256727297*
262.698	-0.234639	-5.73953	-11.3141	-15.7535	-20.5869	-25.3643		264.568	-0.773134	-5.88393	-11.1056	-15.665	-20.6307	-25.5599	-29.5139939705498*
262.898	-0.246856	-5.91671	-10.9964	-15.7057	-20.5286	-25.2974		264.768	-0.790946	-5.89239	-11.2477	-15.5036	-20.7436	-25.6197	-29.8028056192237*
263.098	-0.141824	-5.97608	-11.1444	-15.7051	-20.5462	-25.3619		264.968	-1.21456	-6.20334	-11.1089	-15.0429	-20.8071	-24.8167	-28.6730560231951*
263.298	-0.217226	-5.79192	-10.7536	-15.6076	-20.4447	-25.3354		265.168	-0.43524	-5.49344	-11.2109	-15.2062	-20.4879	-24.8671	-28.8625365982104*
263.498	-0.144768	-5.46244	-10.5439	-15.5044	-20.4917	-25.5223		265.368	-0.0902534	-5.31283	-11.0609	-15.3279	-20.2714	-25.3331	-28.6125728727971*
263.698	-0.15683	-5.25564	-10.5012	-15.62	-20.5562	-25.6499		265.568	-0.493429	-5.46713	-11.2771	-15.397	-20.6247	-25.2795	-29.2885202602334*
263.897	-0.0568523	-6.12511	-10.7297	-15.742	-20.4895	-24.9956		265.767	-0.342655	-5.71099	-11.1648	-15.4166	-21.0441	-25.3852	-29.0770214149584*
264.097	-0.113421	-5.60341	-11.2679	-15.7903	-20.523	-25.0774		265.967	-0.4933	-5.30268	-11.3288	-15.4395	-20.8224	-25.5994	-29.7159158280303*
264.297	-0.26631	-5.23956	-11.0015	-15.736	-20.6268	-25.1405		266.167	-0.458135	-5.53126	-11.4467	-15.3552	-20.4133	-25.5157	-29.1062602368461*
264.497	-0.114872	-5.55287	-11.0105	-15.7901	-20.5323	-25.2992		266.367	-0.490615	-5.5702	-11.2623	-15.3883	-20.6893	-25.7369	-29.782705111829*
264.697	-0.105367	-5.68681	-11.0875	-15.678	-20.5946	-25.1604		266.567	0.685652	-5.13348	-10.5008	-14.4784	-18.6835	-23.0585	-27.1770845426783*
264.897	-0.0726826	-5.76887	-10.839	-15.7669	-20.5934	-25.2135		266.767	0.621167	-5.08633	-10.3882	-14.6724	-19.0076	-23.7966	-26.6446564219281*
265.096	-0.28401	-5.1498	-11.139	-15.7353	-20.3941	-25.2727		266.966	0.467093	-5.05989	-10.5422	-14.7811	-19.9594	-24.0306	-27.6706147503339*
265.296	-0.167833	-5.66424	-11.1219	-15.6785	-20.5883	-25.3352		267.166	0.311199	-5.39243	-10.5612	-14.7264	-20.2021	-24.35	-28.771375428158*
265.496	-0.155107	-6.11172	-10.9153	-15.68	-20.5762	-25.0671		267.366	0.306467	-5.3121	-10.5247	-14.9602	-20.162	-24.6281	-28.5924118226645*
265.696	-0.122798	-5.38361	-10.985	-15.6784	-20.6544	-25.1799		267.566	0.325527	-5.26066	-10.6094	-15.0601	-20.0353	-24.7309	-28.6441460698237*
265.896	-0.102633	-5.62536	-11.0689	-15.6776	-20.6508	-25.4399		267.766	0.229542	-5.29573	-10.476	-14.9872	-19.8635	-24.9036	-28.6515315105763*
266.096	-0.109809	-5.51122	-10.8999	-15.5997	-20.7352	-25.5912		267.966	0.208025	-5.35163	-10.5891	-15.0061	-20.7604	-24.8461	-29.170141467812*
266.296	-0.234866	-5.81552	-10.8611	-15.7194	-20.672	-25.6423		268.166	-0.0155297	-5.34708	-10.5988	-14.9636	-20.0582	-24.9014	-29.6060757905011*
266.495	-0.085645	-5.44866	-10.9217	-15.706	-20.7545	-25.6044		268.365	0.0331317	-5.47901	-10.5364	-15.0578	-20.4249	-24.9612	-29.7908136766808*
266.695	-0.167911	-5.67538	-10.6445	-15.6659	-20.7467	-25.0195		268.565	0.0107847	-5.54089	-10.4775	-15.0669	-20.3746	-25.1643	-29.903646008328*
266.895	-0.0902288	-5.71083	-10.4871	-15.6546	-20.6541	-25.9305		268.765	-0.144186	-5.41021	-10.476	-15.2198	-20.407	-25.1802	-29.4387474439447*
267.095	-0.0857683	-6.35201	-10.1951	-15.5689	-20.7342	-25.8214		268.965	-0.122985	-5.56511	-10.3844	-15.1233	-19.8238	-25.2425	-29.6528087799338*
267.295	-0.278728	-5.59851	-11.2648	-15.6805	-20.6708	-25.0298		269.165	-0.115107	-5.48574	-10.5021	-15.0758	-20.0297	-25.0399	-29.9659645225152*
267.495	-0.327718	-4.725	-11.0236	-15.7953	-20.6642	-25.5987		269.365	-0.0667143	-5.62497	-10.4409	-15.1558	-20.5836	-25.1941	-30.1428511163643*
267.694	-0.241103	-4.95576	-11.1557	-15.7444	-20.4606	-25.0558		269.564	0.0225681	-5.53278	-10.5672	-14.9758	-20.7303	-25.4068	-30.0434762390568*
267.894	-0.4	-4.93261	-11.2761	-15.7763	-20.4396	-25.0124		269.764	-0.0996973	-5.49651	-10.6117	-15.0666	-20.4117	-24.8249	-30.4026601553505*
268.094	-0.317576	-4.6145	-11.1314	-15.647	-20.4547	-25.1371		269.964	-0.114778	-5.37619	-10.7778	-15.1262	-20.0845	-25.4216	-30.4418628290341*
268.294	-0.431741	-5.32084	-11.1199	-15.7035	-20.6574	-25.0336		270.164	-0.243722	-5.76455	-10.7305	-15.1629	-20.3274	-25.1273	-29.9509876774358*
268.494	-0.208468	-5.32254	-10.6536	-15.6238	-20.4944	-25.5019		270.364	-0.89752	-5.94519	-10.8917	-14.8438	-21.1128	-24.8691	-29.5496031984819*
268.694	-0.183343	-5.29898	-10.4667	-15.6829	-20.7315	-25.2145		270.564	-0.753959	-5.77413	-10.649	-14.8818	-20.9716	-25.6581	-29.8047844251798*
268.893	-0.0104616	-5.29194	-10.6536	-15.6138	-20.7443	-25.5134		270.763	-0.730433	-5.76044	-10.7151	-14.9705	-21.1029	-25.248	-30.0377247926714*
269.093	0.0535507	-5.35299	-10.9523	-15.5837	-20.7312	-25.383		270.963	-0.485435	-5.89554	-10.5572	-15.0935	-20.2851	-25.1168	-30.4875045936114*
269.293	-0.144149	-5.73869	-11.0575	-15.5439	-20.6421	-24.9951		271.163	-0.747299	-5.7745	-10.5514	-15.1142	-20.523	-25.1007	-29.7194189827715*
269.493	-0.20792	-5.44811	-11.5055	-15.6664	-20.6778	-25.4423		271.363	-0.739244	-5.85251	-10.5698	-15.0774	-20.9548	-25.0194	-29.9333356484542*
269.693	-0.293713	-5.43892	-10.8624	-15.8021	-20.7065	-25.0601		271.563	-0.638383	-5.6913	-9.88473	-15.2153	-21.0133	-25.0551	-30.0281148725386*
269.893	-0.268243	-5.22063	-11.0071	-15.7529	-20.7025	-25.372		271.763	-0.637045	-5.71394	-9.62909	-15.1866	-20.526	-25.2166	-30.2380776107282*
270.092	-0.288883	-4.89923	-10.5051	-15.8561	-20.5829	-24.9167		271.962	-0.692157	-5.72878	-9.59982	-15.1267	-20.8081	-25.1861	-30.044695622563*
270.292	-0.0101735	-6.48895	-10.6146	-15.6439	-20.8033	-24.825		272.162	-0.69366	-5.78098	-9.77801	-15.2777	-20.4943	-25.0699	-30.3404014333713*
270.492	0.146381	-6.19532	-10.5826	-15.8589	-20.7349	-25.0134		272.362	-0.621835	-5.78515	-9.66938	-15.2118	-20.5318	-24.9756	-30.1430360878472*
270.692	0.24586	-6.27395	-10.3483	-15.9109	-20.9188	-25.3045		272.562	-0.604932	-5.63733	-9.38588	-15.2466	-20.5505	-24.9368	-30.193261110534*
270.892	0.0873396	-6.34021	-9.9072	-15.6977	-20.9005	-25.2287		272.762	-0.476404	-5.65298	-9.46282	-15.1385	-21.088	-24.5097	-30.5857039138049*
271.092	0.219712	-6.57674	-9.86666	-15.5478	-21.0114	-25.0047		272.962	-0.820831	-5.62975	-9.62109	-14.8192	-20.9186	-25.5815	-30.2427836600631*
271.291	0.00373069	-5.8881	-10.3287	-15.6948	-20.8015	-25.0171		273.161	-0.702373	-5.55759	-9.69321	-15.1423	-20.4556	-25.0149	-30.4581481887204*
271.491	-0.452915	-5.21506	-11.0677	-15.9696	-20.7081	-25.7762		273.361	-0.468018	-5.48096	-9.36175	-15.083	-20.6827	-25.2774	-30.7458310405618*
271.691	-0.44301	-5.01094	-11.1529	-15.8595	-20.6672	-25.2867		273.561	-0.656438	-5.60861	-9.29385	-15.2015	-20.452	-24.9461	-30.4976924671838*
271.891	-0.209532	-5.76786	-10.8961	-15.9412	-20.7697	-25.1574		273.761	-0.452657	-5.6146	-9.27972	-15.3911	-20.741	-25.2491	-29.8850987792311*
272.091	-0.289911	-5.36326	-10.8458	-16.0095	-20.7318	-25.3918		273.961	-0.636572	-5.71765	-9.41772	-15.3093	-20.6753	-24.9927	-30.0092102275007*
272.291	-0.338999	-5.48591	-10.7117	-15.8802	-20.7916	-25.0497		274.161	-0.764849	-5.73763	-9.31697	-15.3353	-20.8277	-24.7288	-30.3447424522992*
272.491	-0.180737	-4.64294	-10.6004	-15.7921	-20.8684	-25.7504		274.361	-0.642086	-5.80732	-9.57546	-15.4382	-20.4696	-25.1686	-29.9792832857693*
272.69	-0.191788	-5.56458	-10.7197	-15.644	-20.8295	-25.6221		274.56	-0.291779	-5.90477	-9.3528	-14.753	-20.714	-23.4711	-30.0557147420136*
272.89	-0.0165978	-6.12191	-10.7408	-15.6408	-20.9021	-25.6589		274.76	0.128945	-5.89894	-9.30704	-14.6021	-21.0997	-23.5481	-29.8355755019155*
273.09	-0.395739	-5.68846	-10.7009	-15.7932	-20.983	-25.3374		274.96	0.223376	-5.67493	-9.4139	-14.6949	-20.7332	-24.2529	-30.5626576451403*
273.29	-0.244045	-5.82039	-10.9049	-15.7893	-20.7057	-25.1544		275.16	0.45049	-5.29214	-9.42957	-14.927	-20.3831	-24.4266	-30.0175056469829*
273.49	-0.408851	-5.171	-10.7885	-15.7794	-20.7469	-25.3092		275.36	-0.0283716	-5.56606	-9.56071	-14.7936	-20.8957	-24.5925	-30.0070071177511*
273.69	-0.624183	-5.26896	-10.9674	-15.7688	-20.6874	-25.365		275.56	-0.0615635	-5.43038	-9.51877	-14.998	-20.5217	-24.2297	-29.6694716788573*
273.889	-0.785611	-4.73711	-10.7641	-15.8203	-20.7259	-24.9631		275.759	-0.0447675	-5.70483	-9.43049	-14.9249	-20.895	-24.1407	-29.8562349265846*
274.089	-0.759534	-5.10918	-10.5726	-15.7945	-20.8094	-25.2004		275.959	-0.0968473	-5.59605	-9.36449	-15.0331	-21.1337	-24.475	-29.2387715055687*
274.289	-0.290916	-5.45231	-10.4902	-15.6598	-20.925	-25.1398		276.159	-0.138074	-5.71754	-9.25251	-14.7779	-20.2846	-24.9312	-29.9718998714471*
274.489	-0.544703	-5.39061	-10.4043	-15.92	-20.8381	-25.0492		276.359	-0.0944718	-5.62312	-9.35857	-14.945	-21.0078	-24.2629	-30.2646454562293*
274.689	-0.47397	-5.30106	-9.9913	-15.7663	-20.8668	-25.3027		276.559	-0.227648	-5.67772	-9.4156	-15.0499	-20.633	-24.831	-30.0257637583107*
274.889	-0.304701	-5.04038	-10.5457	-15.7097	-20.9658	-25.0159		276.759	-0.322438	-5.59392	-9.39248	-15.0288	-20.3714	-24.9044	-30.4704257192273*
275.089	-0.296067	-5.40458	-10.1734	-15.7976	-20.9981	-25.1445		276.959	-0.272093	-5.54123	-9.43157	-15.0975	-20.9155	-24.8854	-29.9388689408418*
275.288	-0.51712	-5.11849	-10.2253	-15.7857	-20.9752	-25.344		277.158	-0.238094	-5.53148	-9.47222	-15.013	-20.2545	-24.5007	-30.6105478150784*
275.488	-0.489401	-5.24058	-9.87378	-15.7953	-21.0238	-25.225		277.358	-0.10183	-5.51847	-9.50269	-15.0646	-20.9232	-25.1385	-30.365215768319*
275.688	-0.255554	-5.6127	-9.41753	-15.6104	-21.0089	-25.4235		277.558	-0.208755	-5.61899	-9.57808	-15.0399	-20.6196	-24.9097	-29.9085158778512*
275.888	-0.376276	-5.2547	-9.87837	-15.8481	-20.9904	-25.3635		277.758	-0.286871	-5.53662	-9.57433	-15.1456	-20.3805	-24.8857	-29.9991330493425*
276.088	-0.456588	-5.33207	-9.82325	-15.6979	-20.7474	-25.5704		277.958	-0.0829767	-5.60071	-9.41686	-14.8022	-20.3293	-24.3814	-29.9363078829573*
276.288	-0.178076	-4.75024	-10.0206	-15.6992	-20.7387	-25.513		278.158	-0.0536679	-5.49964	-9.55478	-14.8672	-21.109	-24.5576	-30.4471515624207*
276.487	-0.335014	-5.50614	-10.1038	-15.8625	-20.7855	-25.2901		278.357	-0.0640046	-5.52292	-9.45969	-14.9565	-20.8002	-24.5804	-30.294452406439*
276.687	-0.808534	-4.12492	-10.6545	-15.9371	-20.6514	-25.3505		278.557	-0.13781	-5.55836	-9.53711	-15.0173	-20.9216	-25.0302	-30.2858945471516*
276.887	-0.618686	-4.63506	-10.5118	-15.8894	-20.7081	-25.2219		278.757	-0.226878	-5.50408	-9.30189	-15.1219	-20.5008	-24.7812	-30.3352136803591*
277.087	-0.899978	-4.69183	-10.2589	-15.9445	-20.8079	-25.6641		278.957	-0.164587	-5.61031	-9.35822	-15.2129	-20.7937	-24.8982	-30.0394412543443*
277.287	-0.526498	-4.98478	-9.73365	-15.9317	-20.8768	-25.7019		279.157	-0.295282	-5.54188	-9.41929	-15.2367	-20.5028	-25.1045	-30.7010694427604*
277.487	-1.04755	-3.75777	-9.99535	-16.183	-20.5445	-24.2085		279.357	-0.270496	-5.53534	-9.53673	-15.1296	-20.4353	-25.0946	-30.2674615350455*
277.686	-0.829372	-4.44521	-10.0168	-15.9745	-20.9239	-25.1344		279.556	-0.234837	-5.65541	-9.57951	-15.1345	-20.7644	-25.1052	-30.4594297752274*
277.886	-0.401141	-5.57447	-9.45425	-15.7487	-20.9194	-25.1082		279.756	-0.303372	-5.53541	-9.53314	-15.2607	-20.7434	-25.5216	-30.5985425222022*
278.086	-0.385765	-5.22237	-9.77689	-15.6128	-20.9658	-25.2375		279.956	-0.393557	-5.68749	-9.70625	-15.1349	-20.3772	-25.0766	-30.1046486942259*
278.286	-0.297	-5.77479	-9.88276	-15.8177	-20.9729	-25.3359		280.156	-0.516096	-5.5616	-9.71427	-15.0973	-20.7808	-25.2169	-30.1810343886209*
278.486	-0.487047	-5.62685	-9.97659	-15.7237	-20.953	-25.2007		280.356	-0.424771	-5.64416	-9.7921	-15.241	-20.9367	-24.8105	-30.274187874166*
278.686	-0.367624	-5.05908	-9.61356	-15.7461	-20.8826	-25.1965		280.556	-0.451449	-5.53745	-9.62658	-15.3259	-20.6657	-25.2591	-30.0939258293598*
278.885	-0.542047	-4.99292	-9.93343	-15.9907	-20.9277	-25.5565		280.755	-0.470598	-5.3334	-9.78148	-15.1773	-20.239	-25.4902	-30.3062725686289*
279.085	0.0445749	-5.96204	-8.9683	-15.6706	-21.1194	-25.334		280.955	-0.435289	-5.27562	-9.90464	-15.2731	-21.0255	-25.2214	-30.692419927863*
279.285	0.301588	-5.83993	-8.47292	-15.5372	-21.4212	-25.4688		281.155	-0.381513	-5.33126	-9.93739	-15.2079	-20.1582	-25.5454	-30.7551421588574*
279.485	-0.133526	-5.52086	-9.1563	-15.562	-21.1372	-25.5614		281.355	-0.53994	-5.32993	-9.81732	-15.3548	-20.8199	-25.494	-30.0429749306312*
279.685	-0.300073	-5.22809	-9.37351	-15.5985	-21.1089	-25.7409		281.555	-0.4844	-5.4388	-9.86417	-15.4401	-20.3141	-25.4318	-31.2791365988886*
279.885	-0.324516	-5.02832	-9.07286	-15.5345	-20.9719	-25.9758		281.755	-0.428166	-5.48815	-9.71871	-15.4092	-20.9017	-25.0052	-30.3625907334542*
280.084	-0.57213	-5.61287	-9.68131	-15.8726	-21.0251	-25.4171		281.954	-0.574323	-5.54449	-9.56137	-15.3399	-20.5628	-25.2365	-30.3463831559481*
280.284	-0.372857	-5.45431	-9.04516	-15.7432	-21.0489	-25.0531		282.154	-0.488925	-5.34082	-9.47851	-15.4093	-20.8393	-25.3773	-30.7101044570596*
280.484	-0.120827	-5.70603	-8.99392	-15.5222	-21.3895	-25.9004		282.354	-0.469518	-5.40335	-9.56151	-15.4165	-20.1813	-25.3124	-30.3656524402078*
280.684	-0.106755	-6.05407	-9.02139	-15.604	-21.1811	-25.2962		282.554	-0.522736	-5.49797	-9.72631	-15.3627	-20.8168	-25.2389	-30.8415524752196*
280.884	0.00684657	-5.6076	-9.20348	-15.3778	-21.2696	-25.5971		282.754	-0.57751	-5.53202	-9.70537	-15.3114	-20.4848	-25.2326	-30.7125634656334*
281.084	0.248595	-5.92352	-9.16429	-15.3399	-21.1788	-25.4886		282.954	-0.55541	-5.52253	-9.81914	-15.4149	-20.7421	-25.54	-30.6824594875661*
281.284	0.123354	-6.04533	-8.70284	-15.4202	-21.1435	-25.6978		283.154	-0.507944	-5.35101	-9.73336	-15.5452	-20.3165	-25.3705	-30.4403549464181*
281.483	0.161312	-5.96405	-8.46667	-15.4742	-20.9162	-25.9226		283.353	-0.484771	-5.58188	-9.94951	-15.5136	-20.3255	-25.4866	-30.7441957953116*
281.683	0.112445	-5.86473	-8.78802	-15.7512	-21.2413	-25.7011		283.553	-0.660142	-5.49756	-9.99399	-15.5535	-20.5948	-25.3469	-30.8696357086349*
281.883	0.0650482	-5.67501	-8.62522	-15.6255	-21.1442	-25.6608		283.753	-0.619121	-5.47799	-9.99973	-15.4826	-20.4617	-25.0698	-30.708687775187*
282.083	0.0783516	-5.96715	-8.74685	-15.5878	-21.1479	-25.8012		283.953	-0.763234	-5.50579	-9.99234	-15.5849	-20.3755	-25.5824	-30.6997717084908*
282.283	-0.0819335	-5.96098	-8.89594	-15.6733	-21.1416	-25.9997		284.153	-0.630717	-5.4602	-9.79352	-15.485	-20.4809	-25.4427	-29.7860891825073*
282.483	-0.0538361	-5.44356	-8.96498	-15.6062	-21.0485	-25.7748		284.353	0.0340692	-5.46386	-9.49027	-14.953	-20.8942	-24.2466	-29.23304587286*
282.682	-0.167274	-5.55582	-8.88752	-15.5868	-21.1997	-26.3589		284.552	-0.0294917	-5.56673	-9.55322	-14.9406	-20.1906	-24.9784	-30.3571039056847*
282.882	0.0791141	-5.64922	-9.21335	-15.5971	-21.0777	-24.8538		284.752	-0.192105	-5.58251	-9.30866	-15.1255	-20.212	-24.7501	-30.0971299320872*
283.082	-0.170315	-5.55623	-9.20722	-15.6772	-21.0668	-25.7162		284.952	-0.252875	-5.37224	-9.2286	-15.2452	-20.8452	-24.8245	-29.680448518462*
283.282	-0.151761	-5.62243	-9.14001	-15.5269	-21.02	-25.5057		285.152	-0.278212	-5.39072	-9.39583	-15.3076	-20.621	-25.1069	-30.5500946858728*
283.482	-0.127714	-5.27803	-9.36608	-15.6511	-21.0394	-25.5745		285.352	-0.312716	-5.56124	-9.46868	-15.252	-20.6005	-25.0006	-29.8147229636523*
283.682	-0.0620511	-5.94286	-9.43163	-15.5102	-21.0417	-25.2865		285.552	-0.379784	-5.54979	-9.38931	-15.3397	-20.5986	-25.2901	-30.3529755368693*
283.881	-0.00119096	-5.55617	-9.65226	-15.7303	-21.0686	-25.5123		285.751	-0.455996	-5.56369	-9.45737	-15.2137	-20.53	-25.1492	-30.750069941949*
284.081	0.102752	-6.16689	-10.0824	-15.7482	-20.9941	-25.339		285.951	-0.392194	-5.59492	-9.47536	-15.2468	-20.4542	-25.4779	-29.800661855913*
284.281	-0.0299818	-5.42219	-9.71538	-15.6968	-21.1287	-25.6607		286.151	-0.495176	-5.53283	-9.61526	-15.3217	-20.6467	-25.1579	-30.3785574591216*
284.481	-0.063359	-5.98319	-9.54931	-15.7458	-21.0358	-25.8461		286.351	-0.423255	-5.47531	-9.72381	-15.4011	-20.5765	-25.3235	-30.7173527555472*
284.681	-0.234598	-5.46586	-9.81921	-15.8935	-21.0764	-25.4448		286.551	-0.664796	-5.48853	-9.82337	-15.3788	-20.3516	-25.2366	-30.2681665781993*
284.881	-0.0589828	-5.24075	-9.46841	-15.7183	-20.9172	-25.4889		286.751	-0.540574	-5.34894	-9.70585	-15.3155	-20.0939	-25.2396	-30.4845813937225*
285.08	-0.0402915	-5.72413	-9.75484	-15.7994	-21.029	-25.541		286.95	-0.567291	-5.43503	-9.69984	-15.3246	-20.8641	-24.8499	-30.5256910954206*
285.28	-0.102979	-5.76646	-9.80015	-15.6459	-21.0641	-25.6765		287.15	-0.452532	-5.60487	-9.64718	-15.4121	-20.4344	-25.1516	-30.6964812038621*
285.48	-0.195243	-4.92083	-9.60737	-15.5581	-20.9694	-26.0962		287.35	-0.572546	-5.50152	-9.68246	-15.4002	-20.4311	-25.2084	-30.2428507528793*
285.68	0.0555611	-6.10649	-9.25446	-15.6249	-21.021	-26.0253		287.55	-0.57836	-5.46983	-9.67835	-15.4849	-20.287	-25.3456	-30.5900988344191*
285.88	-0.252475	-5.12876	-10.5297	-15.7684	-20.9473	-25.4683		287.75	-0.436367	-5.25198	-9.37929	-15.2195	-19.7889	-24.8267	-29.2516722032502*
286.08	-0.14521	-5.72136	-9.64712	-15.5837	-20.9501	-25.8045		287.95	-0.103621	-5.24839	-9.53162	-15.1524	-20.0122	-24.5719	-29.0392809098024*
286.279	-0.516298	-4.95503	-10.2402	-15.8569	-21.0911	-25.4121		288.149	-0.181042	-5.41271	-9.47965	-15.1816	-20.1549	-24.9851	-28.8950488672311*
286.479	-0.486934	-4.87648	-10.1585	-15.812	-20.8693	-24.9223		288.349	-0.192316	-5.48718	-9.56347	-15.2369	-20.5359	-24.8937	-28.9774870614382*
286.679	-0.331805	-5.47437	-9.79769	-15.844	-20.9433	-25.1565		288.549	-0.464977	-5.34535	-9.54662	-15.2375	-20.7602	-25.0207	-29.4280978808233*
286.879	-0.285896	-4.69225	-9.98269	-15.9291	-20.9456	-26.0174		288.749	-0.332952	-5.38623	-9.62337	-15.2983	-20.4493	-25.4661	-29.1737064844042*
287.079	-0.253421	-5.0931	-9.83379	-15.8139	-20.8794	-25.1986		288.949	-0.340925	-5.29956	-9.79767	-15.3153	-20.6462	-25.1138	-29.4211377402957*
287.279	-0.565311	-5.9224	-9.83691	-16.0598	-20.7738	-24.3573		289.149	-0.405553	-5.4218	-9.5423	-15.225	-20.3063	-25.267	-29.1256166280503*
287.479	-0.606164	-4.79159	-10.2513	-15.7585	-20.9277	-25.1671		289.349	0.10824	-5.59299	-9.41902	-14.873	-20.5607	-24.473	-29.562992422839*
287.678	-0.573139	-4.91722	-10.0633	-16.0416	-20.9009	-25.2777		289.548	-0.066233	-5.6598	-9.51793	-14.9937	-20.831	-24.1285	-29.470871256931*
287.878	-0.406354	-4.78676	-9.89549	-15.7928	-20.9822	-25.5736		289.748	-0.0597984	-5.72052	-9.51522	-15.0499	-20.8391	-24.8861	-29.4644312563043*
288.078	-0.044198	-5.10429	-9.49065	-15.8568	-21.0583	-25.821		289.948	-0.230368	-5.62641	-9.65954	-15.1196	-20.2154	-24.7187	-29.9135537068483*
288.278	0.0111068	-6.4186	-9.73026	-15.6088	-21.0433	-25.4362		290.148	-0.248851	-5.62498	-9.71924	-15.2555	-20.5154	-24.8659	-29.3910039684692*
288.478	-0.206683	-5.40214	-10.1145	-15.8187	-21.0729	-25.7448		290.348	0.228444	-5.81468	-8.78908	-14.4329	-20.6184	-23.6888	-29.6477090435992*
288.678	-0.254639	-5.59466	-9.87893	-15.7798	-21.0887	-26.0018		290.548	0.685985	-5.47206	-7.9285	-14.1784	-19.0977	-22.8637	-27.5720656377629*
288.877	0.0317047	-4.95872	-9.39272	-15.5835	-20.9178	-26.3		290.747	0.640332	-5.49929	-8.01244	-14.3852	-19.2839	-22.9889	-28.2564335147882*
289.077	0.268252	-6.23728	-8.88984	-15.6614	-21.0289	-25.5741		290.947	0.455186	-5.6114	-8.10672	-14.4549	-19.906	-23.451	-28.8102451395265*
289.277	-0.241074	-5.16088	-9.78828	-15.7336	-21.0124	-25.7722		291.147	0.405741	-5.57431	-8.04826	-14.4954	-20.4334	-23.6223	-29.3351161074011*
289.477	0.0439308	-5.69778	-9.81236	-15.7631	-21.0755	-25.9537		291.347	0.344648	-5.45376	-8.23459	-14.5931	-20.2666	-24.178	-29.6367494889234*
289.677	-0.426276	-5.63716	-10.0873	-15.6221	-20.9855	-25.7122		291.547	0.37447	-5.64017	-8.32582	-14.6444	-20.5288	-24.5002	-28.9607686687956*
289.877	-0.187753	-5.37652	-10.0735	-15.5633	-20.9571	-25.5503		291.747	0.21379	-5.54193	-8.38184	-14.6716	-20.1051	-24.1857	-29.2997404534429*
290.077	-0.0707481	-4.98957	-9.37752	-15.7017	-20.9246	-25.7575		291.947	0.215941	-5.57042	-8.33365	-14.774	-20.2419	-24.5684	-29.7056103714546*
290.276	-0.141764	-5.45068	-9.26474	-15.7144	-20.9138	-25.7994		292.146	0.08519	-5.64957	-8.4163	-14.7767	-20.2605	-24.7175	-29.585243812206*
290.476	-0.224622	-5.71387	-9.67694	-15.5618	-20.9639	-25.4957		292.346	0.0709521	-5.6494	-8.28485	-14.7687	-20.3259	-24.6151	-29.3760793420698*
290.676	-0.308378	-5.29936	-9.70621	-15.6678	-20.9827	-25.1232		292.546	0.0709389	-5.53108	-8.40125	-14.9211	-20.4662	-24.5763	-30.1277092002135*
290.876	-0.232685	-4.91942	-9.67945	-15.5512	-20.9698	-25.3559		292.746	0.021268	-5.5809	-8.53843	-14.8946	-20.3526	-24.7124	-30.4938806854878*
291.076	-0.308377	-5.07401	-10.0917	-15.6517	-20.9329	-25.2348		292.946	-0.110182	-5.56802	-8.61498	-14.9409	-19.9216	-24.8908	-29.7172983949115*
291.276	-0.203231	-5.41478	-9.68546	-15.6973	-20.8913	-25.3643		293.146	-0.0931737	-5.29057	-8.57404	-14.9782	-20.2567	-25.0869	-30.1472365757542*
291.475	-0.288378	-5.52347	-10.363	-15.559	-20.8838	-25.4703		293.345	-0.149357	-5.44736	-8.84834	-15.1122	-20.1667	-25.1612	-30.1465931670181*
291.675	-0.0707933	-5.56912	-9.98647	-15.4129	-20.9169	-25.934		293.545	-0.295079	-5.6298	-8.91834	-15.1216	-19.8843	-25.2418	-30.3127284895849*
291.875	-0.187859	-5.67832	-9.91724	-15.6048	-20.9836	-25.8524		293.745	-0.405756	-5.63267	-8.88721	-15.1674	-20.3332	-25.5004	-30.249806799608*
292.075	-0.145787	-5.30218	-10.1134	-15.6868	-20.8885	-25.6667		293.945	-0.301847	-5.55741	-8.69188	-15.155	-20.0154	-25.1995	-30.1564704804528*
292.275	-0.36035	-5.60587	-10.0819	-15.7417	-20.9368	-25.9383		294.145	-0.340438	-5.79199	-8.82824	-15.1392	-20.3107	-25.3183	-30.4564952036747*
292.475	-0.15445	-5.53958	-10.3894	-15.8525	-20.9023	-25.5615		294.345	-0.441414	-5.66798	-8.93082	-15.0536	-19.9973	-25.0382	-30.5005797326152*
292.674	-0.319381	-5.06083	-9.89973	-15.9066	-20.9463	-25.5511		294.544	-0.189671	-5.29961	-8.88165	-15.3432	-20.7804	-25.4765	-29.9668997736304*
292.874	-0.252146	-5.25302	-9.85635	-15.9141	-20.9261	-25.6927		294.744	-0.630803	-5.84291	-9.06845	-15.0514	-20.1148	-24.8845	-30.2736115582461*
293.074	-0.170436	-5.5248	-9.94656	-15.8938	-21.0203	-25.7404		294.944	-0.857486	-5.8731	-9.17097	-14.9633	-20.9976	-24.8285	-30.4677176712169*
293.274	-0.171858	-5.75586	-10.0035	-15.7707	-21.0603	-25.5533		295.144	-0.357992	-5.35681	-9.05194	-15.4165	-20.8	-25.2317	-30.4964722876612*
293.474	-0.370132	-5.01222	-9.43878	-15.8416	-20.838	-25.8096		295.344	-0.315576	-5.30641	-9.19336	-15.3307	-20.9418	-25.5922	-30.2186164182706*
293.674	-0.173769	-5.41261	-10.1668	-15.7868	-20.8426	-25.2175		295.544	-0.425979	-5.6718	-9.26688	-15.1822	-20.4275	-24.592	-31.0172048796563*
293.873	-0.145985	-5.80689	-9.85117	-15.7826	-20.8649	-25.4702		295.743	-0.411689	-5.65973	-9.14723	-15.0726	-20.4079	-25.1537	-30.4152729225053*
294.073	-0.249826	-5.143	-9.63681	-15.8412	-20.9852	-25.5159		295.943	-0.341818	-5.76718	-9.14557	-15.0782	-19.9944	-25.0039	-30.426439668895*
294.273	-0.189448	-5.45535	-9.89803	-15.6062	-20.9027	-25.3463		296.143	-0.40527	-5.69876	-9.24334	-15.0756	-20.3388	-24.8333	-30.5245061680556*
294.473	-0.367845	-5.45664	-9.80783	-15.7922	-20.8689	-25.2926		296.343	-0.2539	-5.66295	-9.27161	-14.986	-20.2103	-24.621	-30.7410863275701*
294.673	0.0082137	-5.69561	-9.98863	-15.7355	-20.9709	-25.5776		296.543	-0.28056	-5.61731	-9.18836	-14.875	-20.6768	-24.8425	-30.8882615841585*
294.873	-0.127821	-5.35366	-9.82276	-15.7165	-20.9268	-25.5975		296.743	-0.161323	-5.55562	-9.4071	-15.0295	-20.3206	-24.8961	-30.9155233285829*
295.072	-0.146033	-5.6945	-10.107	-15.85	-21.0456	-25.614		296.942	-0.294165	-5.53434	-9.18358	-15.0227	-20.1552	-24.7339	-30.6692240081032*
295.272	-0.229975	-5.59839	-10.107	-15.845	-21.0298	-25.6731		297.142	-0.154721	-5.45502	-9.21048	-15.0345	-20.4371	-24.691	-30.9208855229174*
295.472	-0.108454	-5.66435	-10.0594	-15.6878	-20.9711	-25.4872		297.342	-0.350601	-5.57256	-9.35037	-15.0043	-20.5372	-24.651	-30.5697997322883*
295.672	-0.279023	-5.1666	-10.143	-15.8518	-20.9897	-25.5099		297.542	-0.320487	-5.51988	-9.52697	-15.1109	-20.5805	-25.1292	-30.7689291640132*
295.872	-0.211748	-5.31975	-9.96679	-15.7771	-21.0322	-25.4961		297.742	-0.46755	-5.66371	-9.5601	-15.146	-20.3844	-25.0829	-30.7048325537354*
296.072	-0.199394	-5.43726	-10.5059	-15.8722	-20.9946	-25.1628		297.942	-0.44146	-5.56289	-9.49119	-15.2481	-20.4541	-25.038	-30.75158442013*
296.272	0.0830328	-5.677	-9.71219	-15.6986	-20.9892	-25.4539		298.142	-0.426168	-5.63887	-9.59315	-15.1747	-20.0462	-25.265	-31.0224358449909*
296.471	-0.0242212	-5.92401	-10.1178	-15.605	-21.015	-25.8064		298.341	-0.365959	-5.65018	-9.58719	-15.2825	-20.2301	-25.3294	-30.4909342874047*
296.671	-0.0592451	-5.58062	-10.0655	-15.7056	-21.0187	-25.908		298.541	-0.432582	-5.40398	-9.60793	-15.1978	-20.0916	-25.1564	-30.9011868446337*
296.871	-0.15684	-5.98204	-10.27	-15.8987	-21.0643	-25.5027		298.741	-0.406341	-5.52027	-9.62136	-15.2742	-20.3473	-25.2502	-30.6900964695213*
297.071	-0.264358	-5.57413	-10.2774	-15.7934	-21.0292	-25.1141		298.941	-0.416415	-5.47849	-9.54989	-15.1858	-20.3796	-25.1018	-30.8647599940765*
297.271	-0.171239	-4.91236	-10.2243	-15.7492	-21.0062	-25.9203		299.141	-0.470573	-5.64418	-9.47305	-15.2384	-20.345	-25.2939	-30.7839627309516*
297.471	-0.129317	-5.28856	-9.90255	-15.8448	-21.0249	-25.5047		299.341	-0.371222	-5.57615	-9.72023	-15.2857	-20.2681	-25.2304	-30.5974963291353*
297.67	-0.146018	-5.28869	-10.3369	-15.8048	-21.0508	-25.4012		299.54	-0.388312	-5.40753	-9.76958	-15.2742	-20.5121	-25.0725	-30.4670624359504*
297.87	-0.340878	-5.3141	-10.7425	-15.9356	-20.9975	-25.4761		299.74	0.274551	-5.34634	-9.58933	-14.5591	-20.2949	-23.7608	-30.8517619549531*
298.07	-0.117389	-6.05536	-10.6369	-15.7655	-21.1114	-25.6858		299.94	0.148843	-5.29189	-9.76663	-14.7205	-20.7733	-24.3194	-30.0433231309758*
298.27	0.044238	-5.7211	-9.9373	-15.8496	-21.0154	-25.9125		300.14	0.0650605	-5.37347	-9.75146	-14.6481	-20.3851	-23.9596	-31.2623836363881*
298.47	-0.0934159	-5.36408	-10.198	-16.0085	-21.0807	-25.8249		300.34	-0.0237086	-5.48813	-9.78569	-14.8291	-20.6519	-24.7397	-30.7757558012081*
298.67	-0.320678	-5.41429	-10.3557	-15.8925	-21.006	-25.5252		300.54	-0.0579283	-5.46209	-9.75193	-14.7723	-20.0319	-24.4452	-30.5959304510341*
298.869	-0.276625	-5.53188	-10.181	-15.9342	-20.9598	-25.419		300.739	-0.0809456	-5.47733	-9.80667	-14.854	-20.4345	-24.9303	-30.8923417371195*
299.069	-0.154845	-5.03472	-10.0795	-15.8716	-21.0902	-25.1766		300.939	-0.217779	-5.49706	-9.82265	-14.9928	-20.4648	-24.5818	-30.8217157449377*
299.269	-0.259464	-5.31202	-10.2466	-15.8632	-21.062	-25.0139		301.139	-0.135763	-5.50046	-9.94848	-14.9864	-20.9288	-24.7744	-30.7701022648478*
299.469	0.160112	-5.87298	-9.56829	-15.593	-21.0545	-26.1309		301.339	-0.142675	-5.39266	-10.0905	-14.9121	-20.4177	-24.8619	-30.9731658373709*
299.669	0.159741	-5.3729	-9.25153	-15.7202	-20.8473	-25.8407		301.539	-0.13552	-5.34813	-10.0264	-15.0648	-20.4567	-25.28	-30.9544596779011*
299.869	-0.02162	-5.39065	-9.31727	-15.6229	-20.9733	-26.0111		301.739	-0.21334	-5.48752	-10.0655	-15.0937	-20.4059	-24.9354	-30.8013802534828*
300.068	-0.194518	-5.40178	-10.2608	-15.6084	-20.9535	-25.692		301.938	-0.221561	-5.51625	-9.94007	-15.1127	-20.9155	-25.2236	-30.8098496412261*
300.268	-0.199912	-5.51607	-10.6699	-15.7446	-20.8713	-25.5691		302.138	-0.261818	-5.19449	-10.1407	-15.0329	-20.6103	-25.2324	-30.6440314516185*
300.468	-0.382622	-5.00133	-10.6455	-15.8843	-20.9258	-25.6245		302.338	-0.407732	-5.48328	-10.2453	-15.1497	-20.8697	-25.269	-31.0514783919619*
300.668	-0.19424	-4.9705	-10.3444	-15.8319	-21.0394	-25.5269		302.538	-0.553351	-5.98164	-10.1259	-14.9423	-20.9818	-25.2217	-30.252189163168*
300.868	0.0707204	-5.36022	-9.54148	-15.8074	-20.9574	-25.5278		302.738	-0.362269	-6.02651	-10.1912	-15.2249	-20.1454	-25.1473	-30.6467397270621*
301.068	0.0339239	-5.45767	-9.93639	-15.7717	-20.8922	-26.0936		302.938	-0.533842	-5.7683	-10.2709	-15.2759	-20.1734	-25.1961	-30.9612740336991*
301.267	-0.0225207	-4.99607	-10.2121	-15.7312	-20.9583	-26.1447		303.137	-0.328129	-5.71267	-10.2427	-15.3904	-19.4911	-25.1195	-31.1470476737585*
301.467	-0.310066	-5.50496	-10.2136	-15.77	-20.9968	-25.8465		303.337	0.0221429	-5.44408	-10.5567	-15.4859	-19.6376	-25.4436	-31.6204459427407*
301.667	-0.219209	-4.98046	-10.2224	-15.7038	-20.9295	-25.6005		303.537	-1.14208	-6.50947	-10.4349	-14.9074	-21.2995	-24.452	-30.551174084198*
301.867	-0.188375	-5.00423	-10.2471	-15.8603	-21.0242	-25.6545		303.737	-1.10788	-6.64485	-10.4823	-14.8713	-21.3528	-25.0525	-30.2237564102951*
302.067	-0.0815009	-5.27079	-10.2473	-15.682	-20.9247	-25.1852		303.937	-0.558966	-6.42104	-10.4626	-15.2541	-20.5873	-25.0802	-29.9761857832924*
302.267	-0.173687	-5.0995	-10.2496	-15.8462	-20.9627	-25.6594		304.137	-0.324071	-5.70735	-10.3709	-15.347	-19.9706	-25.2286	-30.6803075139141*
302.467	0.0173711	-5.42969	-9.93826	-15.6788	-20.9664	-25.3878		304.337	-0.146048	-5.40693	-10.549	-15.4756	-19.4266	-26.3527	-30.4828956582851*
302.666	-0.0930134	-5.93506	-10.0123	-15.5122	-21.0539	-26.0826		304.536	-0.569624	-5.62308	-10.4933	-15.1494	-20.1202	-25.4174	-30.6293806548826*
302.866	-0.126439	-5.5626	-10.4322	-15.6292	-20.9633	-25.4606		304.736	-0.707593	-5.77958	-10.4257	-15.2255	-20.3128	-25.3739	-30.9074858366297*
303.066	-0.237098	-4.83518	-10.716	-15.7329	-20.96	-25.2287		304.936	-0.54933	-5.78659	-10.5834	-15.2295	-20.0069	-25.2656	-31.0556058510442*
303.266	-0.226711	-5.16055	-10.7165	-15.7358	-20.9668	-25.7669		305.136	-0.728514	-5.88908	-10.6874	-15.2638	-19.9812	-25.4266	-30.7175977011848*
303.466	-0.0358897	-5.63096	-10.4873	-15.8869	-21.0119	-25.4757		305.336	-0.587405	-6.20752	-10.6199	-15.3009	-20.3151	-25.1997	-30.2550200251471*
303.666	-0.152146	-5.52611	-10.4941	-15.9175	-20.9773	-25.4944		305.536	-0.56331	-5.70068	-10.8208	-15.3416	-20.4704	-25.496	-30.6098004693354*
303.865	-0.0357753	-5.0124	-10.5452	-15.8212	-21.0144	-25.486		305.735	-0.673141	-5.75615	-10.7995	-15.3798	-20.4489	-25.4009	-31.202460199281*
304.065	-0.148104	-5.60476	-9.95321	-15.6986	-20.9585	-25.9754		305.935	-0.56564	-5.73628	-10.7448	-15.5369	-20.4279	-25.4122	-30.9435729018734*
304.265	-0.018513	-5.47033	-10.1547	-15.7354	-20.9943	-25.6646		306.135	-0.724832	-5.78251	-10.8372	-15.4898	-20.0452	-25.3271	-30.7357753057225*
304.465	-0.117762	-5.12164	-10.5505	-15.8499	-21.0017	-25.3007		306.335	-0.959569	-5.98209	-10.8944	-15.263	-20.9362	-25.1712	-30.8329152417191*
304.665	-0.186065	-5.19315	-10.4354	-15.6654	-20.9032	-25.5514		306.535	-0.709276	-5.83053	-10.8432	-15.4544	-20.4161	-25.3599	-30.3539309840594*
304.865	-0.306929	-5.42869	-10.3172	-15.6927	-20.9956	-25.4146		306.735	-0.833238	-6.01711	-10.9004	-15.4733	-20.1172	-25.296	-30.5668142156819*
305.065	-0.112852	-5.59023	-10.7507	-15.679	-20.9687	-25.5978		306.935	-0.769321	-5.96229	-11.1331	-15.605	-20.8844	-25.3851	-30.7599616973968*
305.264	-0.12069	-5.59984	-10.392	-15.8257	-20.9986	-25.4242		307.134	-0.684858	-5.80307	-11.0437	-15.5118	-19.4592	-25.5509	-30.551264147775*
305.464	-0.0543957	-5.96242	-10.2883	-15.7512	-20.8952	-25.7186		307.334	-0.715345	-5.73117	-11.0865	-15.4983	-20.1015	-25.5205	-30.8875779197326*
305.664	-0.351177	-5.34686	-10.4046	-15.9852	-20.8976	-25.4867		307.534	-0.934215	-5.95356	-10.948	-15.5184	-20.8125	-25.8232	-30.8566417633105*
305.864	-0.291546	-5.20788	-10.8474	-15.8517	-20.8791	-25.6367		307.734	-0.791756	-5.7934	-11.0142	-15.6496	-20.4211	-25.702	-31.1681061755959*
306.064	-0.0625233	-5.3391	-10.1248	-15.8877	-20.9829	-25.4965		307.934	-1.12232	-6.32445	-11.1122	-15.4709	-19.9313	-24.9457	-30.6647517601754*
306.264	-0.0853873	-4.89155	-10.4576	-16.0061	-20.9762	-25.6937		308.134	-0.933468	-6.13821	-10.9855	-15.6471	-20.5006	-25.27	-31.0778902182361*
306.463	-0.128569	-5.24808	-10.2922	-15.9048	-21.0046	-25.9314		308.333	-0.883527	-6.16289	-10.9864	-15.5817	-20.7787	-25.3304	-30.1975540500675*
306.663	-0.181016	-5.23633	-10.5104	-15.7914	-21.0362	-25.3632		308.533	-1.00196	-6.14261	-11.1253	-15.7104	-20.2465	-25.4601	-30.3201107462717*
306.863	-0.104964	-4.64287	-10.4236	-15.8563	-20.998	-25.4274		308.733	-0.993852	-6.13185	-10.9301	-15.5521	-20.0834	-25.7428	-30.2130430293966*
307.063	-0.0473116	-4.73319	-10.4059	-15.8257	-20.9619	-25.6234		308.933	-0.558856	-5.85735	-10.8271	-14.6545	-19.9542	-24.0078	-29.5152450809978*
307.263	-0.183857	-5.79354	-10.5394	-15.9071	-21.0031	-25.4288		309.133	-0.173365	-5.90716	-10.7472	-14.6742	-19.9992	-24.0047	-29.6969410698622*
307.463	-0.129272	-4.89489	-10.4511	-15.8728	-21.017	-25.6847		309.333	-0.447501	-5.8871	-10.732	-14.9514	-19.6886	-24.3627	-29.8832683734872*
307.662	-0.17386	-5.42307	-10.6062	-15.8772	-20.9646	-25.2885		309.532	-0.508998	-5.96465	-10.9454	-14.9837	-21.1796	-24.6487	-29.7963258632605*
307.862	0.0158733	-5.52253	-10.2512	-15.6019	-21.0503	-25.6098		309.732	-0.405348	-5.73767	-10.9264	-15.1945	-20.413	-25.113	-30.3152320750807*
308.062	-0.0343353	-5.44132	-10.6449	-15.7612	-21.0252	-25.3495		309.932	-0.461887	-5.89999	-10.7751	-15.3954	-19.9943	-25.0194	-30.5506721389591*
308.262	-0.10868	-5.58176	-10.4261	-15.8024	-21.0085	-24.9832		310.132	-0.495364	-6.27499	-10.846	-15.3979	-20.2978	-25.4127	-30.495645567705*
308.462	0.046173	-4.90371	-10.4627	-15.6766	-20.9912	-25.3791		310.332	-0.376173	-6.18646	-10.8978	-15.4762	-19.9402	-25.2994	-30.8751441425655*
308.662	0.252629	-4.33018	-10.4142	-15.451	-20.9613	-25.1808		310.532	-0.584241	-6.36515	-10.8347	-15.3807	-20.4056	-24.8339	-30.2007832386852*
308.861	-0.110448	-4.39658	-10.2425	-15.6892	-21.0034	-25.2518		310.731	-0.441521	-6.23151	-10.7253	-15.5124	-21.1112	-25.393	-30.1020699647759*
309.061	-0.153248	-4.99123	-10.0443	-15.7817	-21.0154	-25.2016		310.931	-0.208171	-5.70833	-10.7861	-15.4441	-19.0748	-25.4408	-29.8752879445427*
309.261	-0.178832	-4.61123	-9.88464	-15.7445	-21.122	-24.9506		311.131	-0.523643	-6.03289	-10.7769	-15.5564	-19.9224	-25.5688	-30.6738979893463*
309.461	-0.0323271	-4.91122	-9.87194	-15.7297	-21.0215	-25.247		311.331	-0.370026	-5.79637	-10.699	-15.7039	-19.6702	-25.6302	-30.6240632649034*
309.661	0.289624	-5.63491	-9.49141	-15.6383	-21.0118	-25.703		311.531	-0.590202	-5.93079	-10.7489	-15.4338	-20.5026	-25.2905	-30.0554466891552*
309.861	0.137861	-5.58657	-9.58275	-15.6138	-20.9129	-25.707		311.731	-0.608952	-5.88791	-10.7802	-15.515	-20.2162	-25.3884	-30.7654742251263*
310.06	0.013811	-4.96491	-9.94836	-15.7524	-20.9494	-25.7284		311.93	-0.520602	-6.3078	-10.8945	-15.4714	-19.205	-25.3281	-31.0244770586378*
310.26	0.0757168	-4.90432	-10.3064	-15.8566	-20.9948	-25.46		312.13	-0.97345	-6.42372	-10.9801	-15.4117	-20.6172	-25.0684	-30.5655508238369*
310.46	-0.0489443	-5.07366	-10.4593	-15.8458	-21.0106	-25.3241		312.33	-0.841221	-6.49635	-10.9927	-15.5961	-20.8296	-25.4207	-30.2891843694805*
310.66	-0.125103	-5.21199	-10.6085	-15.8645	-21.0514	-25.2828		312.53	-0.627721	-6.29201	-11.0358	-15.4367	-20.2262	-25.6448	-30.3606932576374*
310.86	-0.130105	-5.22315	-10.3973	-15.8605	-21.0267	-25.6148		312.73	-0.806482	-6.33239	-10.7587	-15.5447	-20.484	-25.3036	-29.9472632756042*
311.06	-0.0521521	-5.10017	-10.7954	-15.8829	-21.0255	-25.2202		312.93	-0.758143	-6.12094	-10.8596	-15.509	-20.6594	-25.271	-30.0537766693572*
311.26	0.0270448	-5.49437	-10.5528	-15.8303	-20.9853	-25.2914		313.13	-0.287459	-5.94494	-10.8149	-15.3614	-19.6041	-25.1358	-30.4985981064865*
311.459	-0.0884281	-5.18852	-10.6324	-15.8029	-21.0006	-25.1453		313.329	-0.555635	-6.38348	-10.8697	-15.42	-20.5685	-25.0204	-30.4031891651491*
311.659	0.0129632	-5.07068	-10.5279	-15.653	-21.0118	-24.6002		313.529	-0.55126	-6.09078	-10.9634	-15.4755	-19.7186	-25.2121	-30.6845229896739*
311.859	-0.00506277	-4.88139	-10.1391	-15.7163	-20.9106	-24.8521		313.729	-0.135015	-5.44937	-11.069	-15.6024	-19.2677	-26.1835	-30.8488294302999*
312.059	-0.0462183	-4.95028	-10.7252	-15.8054	-20.9879	-24.96		313.929	-0.510451	-6.05428	-10.9748	-15.5117	-20.3292	-25.342	-30.7649695506882*
312.259	0.128794	-5.06759	-9.6391	-15.7693	-21.0209	-25.5352		314.129	-0.724052	-5.82874	-11.142	-15.575	-19.822	-24.9817	-31.1668507439156*
312.459	0.0259901	-5.02728	-10.2298	-15.9185	-20.9405	-25.3794		314.329	-0.588437	-5.90978	-10.9679	-15.4128	-20.0075	-24.8058	-30.2043990183844*
312.658	-0.0956769	-4.93373	-10.7115	-15.73	-20.8472	-25.2021		314.528	-1.11561	-6.61503	-11.1336	-15.2436	-20.8173	-25.1301	-29.9326776157584*
312.858	-0.0891975	-5.1532	-10.809	-15.782	-20.9689	-25.2914		314.728	-0.717264	-6.44802	-11.1842	-15.4868	-20.2631	-24.9797	-30.410082667727*
313.058	-0.173229	-4.67161	-10.2899	-15.7662	-20.9559	-25.3112		314.928	-0.69298	-6.19053	-11.2033	-15.5143	-19.6427	-25.543	-30.3584591805729*
313.258	0.0988379	-4.37847	-10.186	-15.7276	-20.872	-25.0462		315.128	-0.450966	-6.62128	-11.1781	-14.894	-20.5238	-23.8559	-29.8563741612358*
313.458	0.032624	-4.69508	-10.5144	-15.673	-20.9453	-25.1911		315.328	-0.108134	-6.53236	-11.157	-14.8444	-20.7679	-24.2101	-29.9944311515745*
313.658	0.0457972	-5.25755	-9.89757	-15.7758	-21.0432	-25.4474		315.528	0.0221995	-6.24633	-11.165	-14.9865	-19.7857	-24.3975	-30.1224625647263*
313.857	0.0152718	-4.65877	-10.1481	-15.6621	-21.0116	-25.2285		315.727	1.3175	-6.26676	-11.0415	-13.8842	-19.8961	-22.2915	-28.4076186474555*
314.057	-0.052682	-4.80207	-10.1055	-15.8708	-20.987	-25.2474		315.927	1.63513	-6.28448	-10.9778	-13.6098	-20.3173	-21.57	-28.9257537240121*
314.257	-0.026347	-5.45188	-10.1115	-15.6364	-21.042	-25.3083		316.127	1.31737	-6.29307	-11.0505	-13.6909	-20.1079	-22.4906	-29.2249726738825*
314.457	-0.0314186	-5.20563	-10.4739	-15.7097	-20.9858	-25.3956		316.327	1.19457	-6.10905	-10.9021	-13.7663	-20.2591	-22.7818	-29.4919554587286*
314.657	-0.0084038	-5.16227	-10.7756	-15.7246	-21.027	-25.5661		316.527	1.32235	-5.81679	-11.0502	-13.9521	-19.9465	-22.6714	-30.0536922006387*
314.857	-0.024294	-4.84623	-10.7971	-15.8949	-20.9548	-25.5337		316.727	1.08233	-6.13964	-10.9969	-14.0036	-20.3347	-23.2022	-29.5278369242913*
315.057	-0.130977	-4.99939	-10.4875	-15.8871	-20.9803	-25.3215		316.926	0.942004	-6.04508	-10.939	-14.0744	-20.1377	-23.6456	-30.0876360938982*
315.256	-0.0157327	-4.84923	-10.3856	-15.761	-20.9433	-25.1934		317.126	0.690112	-6.25934	-10.9567	-14.1349	-20.4519	-23.2216	-30.2024577844054*
315.456	0.0312905	-5.53512	-10.309	-15.692	-21.0408	-25.5727		317.326	0.418491	-6.24287	-11.0806	-13.9528	-20.6924	-24.0761	-30.3102326368205*
315.656	0.0345542	-5.32441	-10.1054	-15.678	-20.9659	-25.8236		317.526	0.919618	-5.88034	-11.0792	-14.3979	-19.9736	-24.7219	-30.411854827809*
315.856	0.0291166	-5.62466	-10.126	-15.7904	-20.9355	-25.5378		317.726	0.639407	-5.50434	-10.91	-14.5538	-18.9836	-23.9333	-30.6882920139142*
316.056	-0.100097	-4.94381	-10.2987	-15.7214	-20.991	-25.1989		317.926	0.874822	-5.77009	-11.0941	-14.7702	-19.1603	-24.94	-30.7052103204059*
316.255	-0.00930339	-4.90517	-10.3997	-15.6411	-21.0788	-25.0319		318.125	0.680486	-5.73733	-11.2342	-14.6003	-20.0614	-24.9821	-30.7553739133651*
316.455	-0.00238396	-4.80291	-10.6487	-15.7547	-21.0296	-25.4935		318.325	0.16412	-6.25758	-11.1314	-14.4876	-20.4807	-24.5706	-30.2713119803983*
316.655	-0.0636975	-5.38934	-10.6052	-15.6898	-21.1172	-25.466		318.525	0.287071	-6.07738	-11.3202	-14.5534	-20.7644	-24.9264	-30.5931196031832*
316.855	0.00744958	-5.07495	-10.4453	-15.8229	-21.0805	-25.4347		318.725	0.0956014	-6.26437	-11.1375	-14.5466	-20.4201	-24.9612	-30.3607612601867*
317.055	0.0422021	-5.34032	-10.3057	-15.9158	-21.051	-25.4068		318.925	0.0410922	-6.41775	-11.1098	-14.514	-20.9654	-24.7016	-29.8371820450864*
317.255	0.0478166	-4.2855	-10.2956	-15.8274	-21.0209	-26.272		319.125	0.0690517	-6.33351	-11.0045	-14.5888	-20.5235	-24.7766	-30.0891070640936*
317.455	-0.0224593	-5.36171	-10.2186	-15.9204	-21.0561	-25.803		319.325	0.19525	-6.37263	-11.2034	-14.7427	-20.2821	-25.2901	-30.5343915553717*
317.654	-0.138462	-5.77853	-10.4087	-15.8214	-21.0152	-25.9804		319.524	0.100217	-6.27222	-11.1217	-14.7242	-20.3182	-25.1283	-30.1551233931625*
317.854	-0.0995963	-5.77289	-10.6066	-15.9351	-21.0437	-25.4152		319.724	0.0639228	-6.10444	-10.9596	-14.7691	-20.0407	-25.0777	-30.6168033673188*
318.054	-0.126575	-4.71239	-10.713	-15.7838	-20.9713	-25.4881		319.924	0.0486814	-6.51673	-10.8675	-14.0277	-20.7874	-23.8482	-29.9940439145825*
318.254	-0.13395	-2.77385	-10.6921	-15.304	-20.6389	-24.764		320.124	0.464227	-6.19312	-10.9014	-14.4217	-20.3317	-24.5973	-29.8309352262839*
318.454	-0.24437	-2.1448	-10.5444	-14.4757	-20.4612	-23.8556		320.324	0.302335	-6.28699	-10.9261	-14.46	-20.4125	-23.7873	-30.3550583708056*
318.654	-0.0231506	-3.13984	-10.2529	-14.5919	-20.7323	-23.8466		320.524	0.231073	-6.32592	-11.1069	-14.5158	-20.5316	-24.9137	-30.888248847895*
318.853	-0.0592091	-3.36402	-9.45542	-14.5139	-20.743	-24.5291		320.723	0.233288	-6.22689	-11.0592	-14.7387	-20.4607	-24.9553	-30.6070821868276*
319.053	-0.060046	-3.2371	-10.1261	-14.7123	-20.7964	-25.1059		320.923	0.207058	-6.13891	-11.0883	-14.7413	-20.4044	-25.1728	-30.4046711203717*
319.253	0.0419021	-4.3694	-9.93295	-14.9172	-20.9444	-24.7348		321.123	0.126802	-6.17257	-11.059	-14.8233	-20.2858	-25.2758	-30.6670147212658*
319.453	-0.0709992	-4.3432	-10.4352	-14.956	-20.9632	-25.1768		321.323	-0.00196786	-6.15485	-11.0891	-14.7725	-20.3598	-25.1305	-30.6230652876908*
319.653	-0.101023	-5.09905	-9.93751	-14.9415	-20.9786	-25.0481		321.523	-0.0686063	-6.05519	-11.0587	-14.8213	-20.2283	-24.7672	-30.7886765130179*
319.853	-0.0406845	-5.09197	-10.452	-15.1896	-20.9912	-24.9831		321.723	-0.222824	-6.03486	-10.8293	-14.7359	-20.8981	-24.8703	-30.5984829346841*
320.053	-0.0497573	-4.9801	-10.4372	-15.1215	-20.929	-25.3489		321.923	-0.110415	-6.03444	-10.8826	-14.8649	-20.2409	-25.4278	-30.524724504*
320.252	-0.109216	-5.14854	-10.068	-15.177	-20.9661	-25.5841		322.122	-0.159784	-6.00554	-10.894	-14.9069	-21.077	-25.1232	-30.2044208519789*
320.452	-0.0946547	-4.9125	-9.71921	-15.1603	-20.8786	-25.5462		322.322	-0.0677079	-6.03591	-10.9511	-14.8807	-19.9147	-25.0444	-30.5717074426025*
320.652	-0.0316705	-4.99501	-10.01	-15.2331	-20.9555	-24.994		322.522	0.984856	-5.48397	-10.662	-13.8075	-18.9008	-23.0746	-29.3495924628147*
320.852	0.0112254	-5.18491	-9.9585	-15.1018	-20.9893	-25.5196		322.722	1.43463	-5.65949	-10.475	-13.5667	-19.9436	-22.2719	-29.4541333050267*
321.052	-0.0775884	-5.10418	-10.1469	-15.1226	-20.919	-25.4746		322.922	1.43167	-5.41181	-10.6337	-13.7506	-20.0382	-23.2057	-29.3797530717676*
321.252	-0.0676358	-4.72614	-10.5059	-15.1329	-20.9796	-25.4148		323.122	1.29143	-5.59732	-10.6752	-13.7757	-20.5298	-23.6888	-29.5277616438772*
321.451	-0.100207	-5.29453	-10.6943	-15.2269	-20.9468	-25.3477		323.321	1.07139	-5.76876	-10.7406	-13.962	-20.3089	-23.801	-29.5162307768135*
321.651	0.062134	-4.91296	-10.4275	-15.2845	-20.9442	-25.1266		323.521	1.44441	-5.34617	-10.8829	-14.2303	-19.551	-24.5324	-30.3059885044679*
321.851	-0.0707277	-5.00279	-10.3586	-15.1624	-20.9623	-24.8973		323.721	0.87876	-5.69058	-10.6643	-14.009	-20.1373	-24.5659	-30.428656915897*
322.051	-0.268975	-4.96442	-10.2383	-15.2622	-20.8498	-25.2386		323.921	0.466649	-6.13685	-10.6847	-13.9837	-20.6527	-24.398	-30.2872093389167*
322.251	-0.121474	-5.18521	-10.6049	-15.3394	-20.9286	-25.6407		324.121	0.380038	-6.15064	-10.5575	-14.039	-20.8623	-24.2435	-30.3968817581219*
322.451	-0.128801	-5.48988	-10.4635	-15.2435	-20.9378	-24.9402		324.321	0.619234	-5.9508	-10.6595	-14.2032	-21.1119	-24.5396	-30.2937205261587*
322.65	-0.138712	-5.07007	-10.399	-15.306	-20.9844	-25.2934		324.52	0.331867	-5.89714	-10.7198	-14.254	-20.3382	-24.5137	-30.2694247390789*
322.85	-0.102003	-4.78401	-10.3926	-15.1979	-20.9492	-25.7166		324.72	-0.0922918	-6.07201	-10.6705	-14.164	-20.8839	-24.3933	-29.9257148370048*
323.05	-0.0386427	-5.25082	-10.1397	-15.4539	-20.9327	-25.4139		324.92	0.103602	-5.92575	-10.6808	-14.2152	-20.6753	-24.4305	-30.4131982761669*
323.25	-0.150134	-5.58327	-10.3503	-15.2956	-20.9649	-25.7957		325.12	0.022049	-6.19155	-10.7125	-14.2596	-20.9241	-24.577	-30.0803607535942*
323.45	-0.0497987	-5.82338	-9.87016	-15.3103	-20.9463	-25.4836		325.32	0.0645023	-6.11322	-10.6201	-14.3213	-20.2585	-25.201	-31.0187732595236*
323.65	0.377166	-6.02286	-9.33981	-15.0928	-20.9693	-25.3828		325.52	-0.101313	-6.3341	-10.7396	-14.4887	-21.057	-24.8814	-30.5104878632587*
323.849	0.0223994	-5.57242	-10.0689	-15.1583	-20.9334	-26.1299		325.719	-0.021015	-6.02306	-10.5703	-14.5712	-20.1814	-25.0389	-30.4724150780873*
324.049	-0.113069	-5.43294	-10.2436	-15.1395	-20.975	-25.5212		325.919	-0.0669058	-6.05066	-10.6608	-14.6225	-20.1532	-25.077	-30.5413821719582*
324.249	-0.0547969	-5.55481	-10.2655	-15.1889	-20.8421	-25.3488		326.119	-0.0291131	-6.41526	-10.5849	-14.749	-21.0234	-25.5025	-30.6102521518204*
324.449	-0.155702	-5.20448	-10.2745	-15.1821	-20.8801	-25.3		326.319	-0.0841253	-6.1511	-10.7497	-14.8058	-20.044	-25.424	-30.6197058707797*
324.649	-0.142393	-4.94506	-10.1353	-15.3165	-20.9761	-25.6036		326.519	-0.0971512	-5.64339	-10.6432	-14.8465	-19.5175	-25.6905	-30.317954906254*
324.849	0.228944	-5.75778	-10.0154	-15.1587	-20.9047	-25.9271		326.719	-0.00277896	-5.97894	-10.5022	-14.8966	-20.0718	-25.2365	-30.2904473064589*
325.048	0.167229	-4.93686	-9.95776	-15.1824	-20.8309	-25.7534		326.918	0.282586	-5.47271	-10.7329	-14.9432	-19.8616	-25.8886	-31.3750806907231*
325.248	0.0413274	-5.41589	-9.8319	-15.3168	-20.941	-25.5511		327.118	-0.347546	-6.16476	-10.7754	-14.816	-20.2721	-25.5218	-30.2671779257511*
325.448	-0.181267	-5.11759	-9.88194	-15.2632	-20.8921	-25.3402		327.318	-0.684922	-6.31767	-10.6066	-14.7007	-20.4608	-25.5077	-30.4251740027173*
325.648	0.00616313	-5.32687	-9.938	-15.1616	-20.944	-25.3148		327.518	-0.516574	-6.18087	-10.3175	-14.7604	-20.8435	-25.0365	-30.5079856423626*
325.848	-0.0494131	-5.08435	-10.2897	-15.2894	-20.9614	-25.5909		327.718	-0.167551	-6.11752	-10.3695	-14.9191	-20.4382	-25.5554	-30.6360658285803*
326.048	-0.00758905	-5.05565	-10.3439	-15.1861	-20.9581	-25.4759		327.918	-0.25826	-5.94211	-10.3287	-15.1138	-19.9566	-25.0948	-30.407311393266*
326.248	-0.057051	-5.57878	-10.2374	-15.123	-20.8867	-25.7076		328.118	-0.432652	-6.14134	-10.4261	-14.9291	-20.4505	-25.1286	-30.3127291718848*
326.447	-0.0271619	-5.32559	-10.1053	-15.2383	-20.8915	-25.4999		328.317	-0.482014	-6.06888	-10.387	-14.9702	-20.8784	-25.684	-29.7332221356899*
326.647	-0.0594214	-5.95074	-10.1136	-15.1232	-20.9515	-25.8959		328.517	-0.466456	-6.15019	-10.4923	-15.1123	-20.3472	-25.6008	-30.1345143904506*
326.847	-0.159376	-5.46921	-10.1771	-15.1588	-20.9415	-25.9695		328.717	-0.544655	-6.2655	-10.3338	-15.0088	-20.8366	-25.471	-30.3833442472693*
327.047	-0.16345	-4.89394	-9.89577	-15.4328	-21.009	-25.4967		328.917	-0.505236	-5.90091	-10.2877	-15.1124	-20.7279	-25.4495	-30.0916459017471*
327.247	-0.126308	-5.1504	-10.0882	-15.4241	-20.9455	-25.8389		329.117	-0.491908	-5.9971	-10.4024	-15.1536	-20.0312	-25.7548	-30.2622307971442*
327.447	-0.231151	-5.35484	-10.2696	-15.3864	-20.9995	-25.4303		329.317	-0.487959	-5.74928	-10.3363	-15.1297	-19.2914	-25.9321	-29.7764575197533*
327.646	0.106705	-5.17901	-10.268	-15.3577	-21.0019	-25.6043		329.516	-0.532234	-5.88705	-10.2381	-15.1995	-19.9043	-25.9421	-29.9029515408215*
327.846	-0.0576523	-5.443	-9.98672	-15.2382	-21.0001	-25.8274		329.716	-0.473552	-5.74783	-10.2657	-15.2291	-19.8994	-25.8753	-29.6280367475754*
328.046	0.268218	-6.04411	-9.28621	-15.2256	-20.9213	-25.8333		329.916	-0.539592	-5.77243	-10.329	-15.3429	-19.9877	-25.9527	-29.1922734547094*
328.246	0.120636	-5.65729	-10.018	-15.3542	-20.8003	-26.1636		330.116	-0.402503	-5.74396	-10.3798	-15.3236	-20.4366	-25.8316	-30.1692980128496*
328.446	-0.108103	-4.82378	-10.1823	-15.4709	-20.9261	-25.7508		330.316	-0.700803	-5.81485	-10.2795	-15.2611	-19.9317	-25.6177	-30.2944053277509*
328.646	-0.0557521	-5.03269	-10.0703	-15.5282	-20.9251	-25.1796		330.516	-0.656265	-5.7144	-10.3712	-15.1985	-20.2437	-25.5746	-30.145779228812*
328.845	-0.0768157	-5.13604	-9.8947	-15.4894	-20.9036	-25.2998		330.715	-0.731443	-5.82235	-10.3029	-15.2929	-19.8909	-25.3731	-30.4214686597942*
329.045	0.00135906	-5.73241	-9.92834	-15.4585	-20.8566	-25.4087		330.915	-0.452094	-5.84269	-10.0982	-15.0718	-19.7354	-24.9971	-29.4790611291788*
329.245	-0.18628	-5.10828	-10.3152	-15.3063	-20.8723	-25.5869		331.115	-0.223593	-5.88095	-10.148	-14.8753	-20.767	-24.7742	-30.5949602206812*
329.445	-0.170988	-4.94873	-10.3785	-15.4007	-20.8852	-25.5908		331.315	-0.463633	-5.74189	-10.1496	-14.9145	-20.5915	-25.3865	-29.9070865052019*
329.645	-0.0460289	-5.14327	-10.1623	-15.3503	-20.9403	-26.1554		331.515	-0.0699383	-5.56088	-10.1482	-15.2336	-20.3829	-25.5374	-30.2815498892913*
329.845	0.00443558	-5.58303	-9.2895	-15.3426	-20.7676	-25.8746		331.715	-0.59671	-6.19729	-10.1847	-14.9859	-20.2855	-25.361	-29.8096166090093*
330.045	0.117787	-5.39692	-10.0965	-15.5192	-20.9187	-25.977		331.914	-1.09324	-6.39659	-10.2297	-14.9666	-21.0168	-24.9202	-30.0450650196889*
330.244	-0.160255	-5.59851	-10.4174	-15.4023	-20.876	-25.1871		332.114	-0.552174	-6.16801	-10.1875	-15.2407	-20.2656	-25.0928	-30.0376778504434*
330.444	-0.0489824	-5.2594	-10.5099	-15.5564	-20.8876	-25.4		332.314	-0.536452	-5.87778	-10.2275	-15.2366	-20.3805	-25.4732	-30.5258796376059*
330.644	-0.149274	-4.97983	-10.4271	-15.4746	-20.8247	-25.5051		332.514	-0.656137	-5.80898	-10.078	-15.1863	-20.009	-25.3265	-30.256430338888*
330.844	-0.0442383	-4.95381	-10.2578	-15.5783	-20.9359	-25.1437		332.714	-0.606968	-5.89687	-10.2457	-15.3735	-20.6642	-25.2595	-30.169272835986*
331.044	-0.268698	-5.13487	-10.3883	-15.578	-20.8732	-25.5531		332.914	-0.633784	-5.85741	-10.2004	-15.3061	-19.942	-25.075	-30.3797041776962*
331.243	-0.0669924	-5.23389	-10.2615	-15.5541	-20.923	-25.4646		333.113	-0.859295	-5.9386	-10.2505	-15.1768	-20.9324	-25.1232	-30.0375503286059*
331.443	-0.124542	-5.58114	-10.4457	-15.6055	-20.8774	-25.5344		333.313	-0.700376	-5.67813	-10.1914	-15.2489	-20.943	-25.482	-29.9707375054631*
331.643	-0.0137214	-5.23114	-10.5158	-15.5491	-20.8934	-25.2253		333.513	-0.654444	-5.70821	-10.4063	-15.3024	-20.1393	-25.6457	-30.7664631050078*
331.843	0.140123	-6.11877	-9.672	-15.3477	-20.9294	-26.1529		333.713	-0.129536	-5.20056	-10.3179	-15.4299	-19.4579	-25.4051	-29.5582620381436*
332.043	0.199865	-5.85323	-10.2456	-15.5591	-20.9078	-25.4926		333.913	1.05294	-4.85435	-10.4039	-13.9691	-19.3907	-23.2971	-27.081257806414*
332.243	-0.0533675	-5.41844	-9.97619	-15.5307	-20.9401	-25.8149		334.113	1.3585	-5.20284	-10.2166	-14.147	-19.9297	-23.0233	-27.3814856502941*
332.443	-0.129522	-5.01354	-9.99595	-15.6687	-21.0283	-25.6717		334.313	1.64936	-5.14719	-9.80932	-13.419	-19.1895	-21.7823	-27.5856729706311*
332.642	-0.149185	-4.76436	-10.0841	-15.6864	-20.9545	-25.5802		334.512	2.28546	-5.21591	-9.59506	-12.9273	-19.3094	-21.3695	-28.1237762339028*
332.842	-0.152306	-4.65141	-9.95158	-15.6071	-20.877	-25.4652		334.712	2.19328	-5.30389	-9.70914	-13.2897	-19.1258	-22.2984	-28.5111026072366*
333.042	-0.116988	-5.02449	-10.3455	-15.5786	-20.8794	-25.5979		334.912	1.89482	-5.28571	-9.45554	-13.3584	-20.1256	-22.4556	-28.6653651395536*
333.242	-0.160962	-4.92127	-10.0057	-15.6875	-20.8966	-25.1653		335.112	1.83129	-5.44449	-8.91169	-13.555	-19.3244	-22.5351	-29.3283199462651*
333.442	-0.0665048	-5.58427	-10.1066	-15.561	-20.8665	-25.3008		335.312	1.70851	-5.47064	-8.94993	-13.6185	-19.4591	-23.0965	-29.0765672307074*
333.642	-0.111796	-5.28876	-10.3065	-15.6273	-20.8894	-25.3369		335.512	1.52795	-5.35092	-8.99184	-13.7924	-19.8016	-23.5538	-29.3613157384294*
333.841	0.22817	-5.86609	-9.34868	-15.4274	-20.758	-26.0619		335.711	1.64669	-5.38916	-9.03495	-13.9162	-20.7374	-23.8952	-29.4339636124295*
334.041	-0.0231469	-5.35041	-9.8827	-15.3819	-20.9406	-26.1925		335.911	1.41135	-5.38725	-8.91964	-13.9798	-19.6004	-24.2463	-29.5733304023731*
334.241	-0.00886962	-5.36691	-9.84198	-15.4921	-20.8101	-25.7697		336.111	1.19866	-5.32607	-9.06937	-13.9211	-20.2598	-24.1842	-29.8064806452912*
334.441	-0.0856259	-5.1003	-9.97864	-15.542	-20.8631	-25.4672		336.311	1.02846	-5.57054	-9.26879	-13.9453	-20.2795	-24.4498	-29.7912351332835*
334.641	-0.0681698	-5.42063	-9.91127	-15.6899	-20.8903	-25.7004		336.511	0.889642	-5.37161	-9.15939	-14.1577	-20.178	-24.8224	-29.5766852706187*
334.841	-0.16266	-5.14696	-10.4195	-15.6586	-20.8891	-25.0087		336.711	1.02565	-5.32994	-9.22653	-14.1766	-20.224	-24.8687	-29.357279025224*
335.041	0.212905	-5.8011	-9.70385	-15.5235	-20.8628	-25.8026		336.911	0.897362	-5.29335	-9.23074	-14.1512	-20.5231	-24.8965	-29.7318268325452*
335.24	-0.00641073	-4.78718	-9.95548	-15.5878	-20.9329	-26.6272		337.11	0.796267	-5.43207	-9.12567	-14.2874	-20.1314	-25.0128	-29.6460647010179*
335.44	-0.0830245	-5.30273	-10.2279	-15.6365	-20.9312	-26.02		337.31	0.597149	-5.52282	-9.28554	-14.4126	-20.8298	-25.2622	-29.5152491747968*
335.64	-0.149612	-5.31583	-10.3272	-15.5964	-20.8953	-25.61		337.51	0.698452	-5.41436	-9.32908	-14.395	-20.1707	-25.1599	-29.8229283468495*
335.84	-0.0901158	-4.91235	-10.4303	-15.6133	-20.9147	-25.3235		337.71	0.448767	-5.55542	-9.44055	-14.407	-19.9791	-25.0231	-30.1603787848309*
336.04	-0.0994913	-5.10189	-10.4875	-15.6045	-20.8705	-25.2936		337.91	0.475828	-5.55493	-9.65013	-14.5429	-20.2059	-25.3538	-30.0852262791418*
336.24	-0.232569	-4.95905	-10.7304	-15.5817	-20.8248	-25.3663		338.11	0.421002	-5.40248	-9.54054	-14.4594	-19.9077	-25.4252	-30.6216376890211*
336.439	-0.106114	-5.29567	-10.2369	-15.6495	-20.9147	-26.0884		338.309	-0.295397	-5.73195	-9.71752	-14.2124	-20.5226	-25.087	-30.1237642790781*
336.639	-0.0169661	-5.5045	-10.1163	-15.7111	-20.893	-25.9892		338.509	0.0851531	-5.52907	-9.63491	-14.5112	-20.2353	-25.3412	-30.2299509649309*
336.839	-0.0800146	-5.08308	-10.1088	-15.7635	-20.8481	-25.8026		338.709	0.122199	-5.53988	-9.63765	-14.473	-20.4428	-25.4462	-28.8860654802854*
337.039	-0.257409	-5.44945	-10.4829	-15.6418	-20.8598	-25.4004		338.909	0.00416696	-5.79767	-9.54792	-14.4584	-19.8891	-25.3596	-29.4126851826148*
337.239	-0.0102654	-5.32489	-10.5074	-15.6425	-20.817	-25.564		339.109	-0.415626	-6.00971	-9.60089	-14.5127	-20.5989	-24.8419	-29.5330913152533*
337.439	0.0521384	-4.7846	-10.3072	-15.497	-20.7985	-25.5381		339.309	0.9741	-5.47771	-8.89717	-13.4984	-18.4478	-22.8378	-27.4519467533512*
337.638	-0.201002	-5.48325	-10.5846	-15.649	-20.8947	-25.3099		339.508	1.726	-5.50397	-8.36112	-12.7829	-17.9032	-21.439	-26.2530981976386*
337.838	-0.0940353	-4.87236	-10.4233	-15.6893	-20.8919	-25.63		339.708	1.56107	-5.64408	-8.34174	-13.0641	-18.4467	-21.6968	-27.2549076608606*
338.038	-0.150439	-5.05301	-10.1996	-15.5981	-20.8477	-25.8484		339.908	1.46843	-5.49139	-8.22052	-13.1941	-19.7559	-22.534	-27.6658568462122*
338.238	0.204899	-5.48275	-9.53312	-15.4698	-20.8159	-26.1329		340.108	1.34555	-5.59458	-8.39234	-13.2689	-20.0211	-22.8183	-27.9699249009478*
338.438	-0.0676521	-5.31822	-10.082	-15.5028	-20.854	-25.9797		340.308	2.21183	-5.04577	-7.58008	-12.3375	-18.2886	-21.5367	-27.3244340131557*
338.638	-0.199373	-5.53234	-9.99719	-15.4919	-20.9206	-25.8866		340.508	2.19759	-4.93286	-6.97064	-12.6304	-18.2569	-21.963	-27.6295107344678*
338.837	0.0088412	-4.83668	-10.0972	-15.6159	-20.9479	-25.7949		340.707	2.08139	-4.89377	-7.06004	-12.7501	-18.8469	-22.0156	-28.2175844998478*
339.037	-0.170853	-5.37273	-10.5176	-15.6864	-20.9355	-25.6657		340.907	2.05798	-4.53364	-7.24314	-12.9058	-19.2717	-23.2022	-28.4839766404776*
339.237	-0.0600843	-5.0219	-10.0959	-15.648	-20.8913	-26.0982		341.107	1.76774	-4.82604	-7.3704	-12.8105	-19.1382	-23.2482	-28.4746464177868*
339.437	0.0428286	-5.30766	-9.99843	-15.7883	-20.9032	-25.6884		341.307	1.74924	-4.88763	-7.56351	-12.9527	-19.4458	-23.4817	-29.0129477754415*
339.637	0.310494	-5.87135	-9.96753	-15.7251	-20.8866	-25.8304		341.507	1.61259	-4.86699	-7.69926	-13.1214	-19.1378	-23.663	-29.3938423357465*
339.837	-0.0468391	-5.39228	-10.1066	-15.8132	-20.8923	-25.7123		341.707	1.26301	-5.0806	-7.82157	-13.0159	-20.0999	-23.7537	-29.3385171446017*
340.036	-0.176526	-5.53508	-10.4014	-15.8487	-20.9196	-25.295		341.906	1.26341	-5.03149	-7.91301	-13.2303	-19.6981	-24.3105	-30.0791213104731*
340.236	-0.108491	-5.43129	-9.93004	-15.9198	-20.8638	-25.5221		342.106	1.28026	-4.96547	-8.04065	-13.3964	-20.0452	-24.3098	-29.9900430243923*
340.436	-0.117947	-5.51061	-10.0338	-15.6296	-20.8789	-25.766		342.306	1.00567	-5.06427	-8.24105	-13.54	-20.0883	-24.4322	-30.1645853452063*
340.636	-0.21491	-5.58223	-10.118	-15.7046	-20.9041	-26.0048		342.506	0.866302	-5.11542	-8.06021	-13.3681	-20.076	-24.8191	-29.8383826653474*
340.836	-0.185952	-5.52463	-9.94246	-15.6342	-20.8896	-26.0214		342.706	0.87874	-5.03624	-7.7357	-13.3977	-19.6766	-24.4354	-29.5746413277726*
341.036	-0.143592	-5.51098	-10.1097	-15.7325	-20.8961	-25.6533		342.906	0.826711	-5.20425	-7.80743	-13.5353	-20.1244	-25.1104	-29.6982347103328*
341.236	-0.0980074	-6.18353	-9.91397	-15.7572	-20.871	-25.4857		343.106	0.799517	-5.13119	-7.85381	-13.6358	-20.3347	-24.6681	-29.6724869892228*
341.435	-0.103657	-5.33513	-10.1704	-15.6412	-20.9133	-25.9003		343.305	0.684836	-4.90757	-7.94209	-13.7751	-20.6573	-24.8477	-30.1653017372806*
341.635	-0.244081	-5.42268	-10.0807	-15.7844	-20.9214	-25.503		343.505	0.637398	-5.07521	-8.18128	-13.7745	-20.0355	-24.9916	-29.4204145024798*
341.835	-0.0705378	-5.11351	-10.1403	-15.7188	-20.9273	-25.7186		343.705	0.507752	-5.00337	-8.26353	-13.7696	-20.7136	-24.838	-30.0156523750975*
342.035	-0.131065	-4.75097	-10.0645	-15.7044	-20.8719	-25.5979		343.905	1.85525	-4.16272	-7.99873	-12.4572	-17.2532	-21.9634	-27.4742374886748*
342.235	-0.239353	-5.2528	-10.5598	-15.8422	-20.8808	-25.3925		344.105	2.71508	-3.50851	-8.19037	-11.8527	-16.8619	-20.8004	-27.7170998374965*
342.435	-0.0345414	-5.19146	-10.0985	-15.6051	-20.941	-25.5635		344.305	2.5051	-3.43818	-8.26156	-12.0756	-17.9239	-21.8988	-28.0444750268635*
342.634	0.191529	-5.40802	-9.95889	-15.7333	-20.9324	-26.1034		344.504	2.32183	-3.55964	-8.38356	-12.2482	-18.6028	-22.3128	-28.2250202033543*
342.834	-0.053501	-5.62044	-9.86961	-15.6992	-20.8426	-25.84		344.704	2.13829	-3.59569	-8.5235	-12.5121	-18.5224	-22.5435	-28.3526791831459*
343.034	-0.000357952	-5.09909	-10.2223	-15.6222	-20.8531	-25.9562		344.904	1.90332	-3.6331	-8.56384	-12.4915	-18.8579	-23.0181	-28.8775465120881*
343.234	-0.169483	-4.8999	-10.5643	-15.7134	-20.8802	-25.7086		345.104	1.69648	-3.76943	-8.63627	-12.531	-19.2623	-23.6105	-29.3233971530187*
343.434	-0.154614	-5.15921	-10.2723	-15.8561	-20.9119	-25.6933		345.304	1.67106	-3.61568	-8.64248	-12.8242	-19.599	-23.903	-29.3622093237685*
343.634	-0.197664	-5.14559	-10.3554	-15.7715	-20.7986	-25.5928		345.504	1.54844	-3.84841	-8.76042	-12.8791	-19.2186	-24.068	-29.978765836404*
343.833	0.0424681	-5.82596	-10.58	-15.7249	-20.9012	-25.4338		345.703	1.2962	-3.93095	-8.90064	-12.9499	-19.5008	-24.3044	-29.8254870166846*
344.033	0.00195677	-5.53152	-10.2732	-15.7491	-20.8726	-26.2721		345.903	1.01361	-3.95757	-9.11501	-12.8816	-20.2202	-24.8073	-29.5568717385309*
344.233	0.124725	-6.0138	-10.0023	-15.7106	-20.8595	-26.0147		346.103	1.27809	-3.7072	-9.11338	-13.0462	-19.483	-24.6022	-30.2829868127253*
344.433	-0.0818715	-5.20542	-9.78094	-15.7058	-20.8732	-25.7574		346.303	1.04661	-3.82152	-9.19868	-13.2072	-19.6336	-25.3616	-30.3779879661999*
344.633	-0.151688	-5.37838	-9.95923	-15.9424	-20.9237	-25.6617		346.503	0.625735	-4.28836	-9.05487	-13.0767	-19.8881	-24.4648	-30.0242213513234*
344.833	-0.190046	-5.27282	-10.1457	-15.8832	-20.9023	-25.4656		346.703	0.656312	-4.2247	-9.31401	-13.247	-19.8614	-24.4107	-30.4504793661066*
345.033	-0.238548	-5.41247	-10.4484	-15.8422	-20.8899	-25.5763		346.902	0.579166	-4.1213	-9.16602	-13.3238	-19.9444	-25.0409	-30.4092539008714*
345.232	-0.279535	-5.1436	-10.1916	-15.9747	-20.944	-25.4768		347.102	0.588855	-4.40317	-9.19794	-13.468	-20.577	-24.4266	-31.1982613261502*
345.432	-0.217267	-5.12709	-10.3773	-15.9507	-20.9617	-26.0678		347.302	0.416853	-4.12529	-9.351	-13.5268	-20.1135	-25.1109	-30.0670801513694*
345.632	0.162279	-5.12773	-9.5141	-15.5926	-20.9151	-26.2179		347.502	0.481936	-4.11686	-9.33841	-13.6071	-20.4203	-24.9441	-30.4394788734412*
345.832	0.0116584	-4.97503	-9.5389	-15.8606	-20.8124	-25.3487		347.702	0.411046	-4.15673	-9.46541	-13.7842	-20.1005	-25.49	-30.2495873264972*
346.032	-0.0872686	-5.63111	-10.0395	-15.749	-20.8901	-25.8101		347.902	0.371893	-4.25648	-9.33271	-13.7951	-19.7344	-25.4211	-30.5689143345471*
346.231	-0.0556368	-5.28552	-10.0191	-15.6234	-20.9355	-26.5082		348.101	0.297538	-4.04756	-9.38459	-13.8836	-20.4175	-25.6474	-30.1823550936513*
346.431	0.0403284	-5.00508	-10.3204	-15.9837	-20.9019	-25.5808		348.301	-0.0141668	-4.35857	-9.56543	-13.8646	-20.4258	-25.3548	-30.2674699500767*
346.631	-0.0446226	-4.95795	-10.0897	-15.83	-20.842	-25.9127		348.501	0.129011	-4.22482	-9.58071	-13.9198	-20.2097	-25.3501	-30.1925725108061*
346.831	-0.148798	-5.61755	-10.4068	-15.9012	-20.9245	-25.7159		348.701	0.165392	-4.35753	-9.40572	-13.9585	-19.8778	-25.7676	-28.8950263513369*
347.031	0.0324647	-4.84904	-10.1103	-15.9461	-20.9143	-25.1556		348.901	0.00740496	-4.28481	-9.4624	-13.9765	-19.9213	-25.4802	-29.9795173487247*
347.231	-0.199768	-5.09453	-9.97054	-15.8846	-20.8819	-25.546		349.101	0.484554	-4.25035	-8.88038	-13.5743	-17.4204	-23.8506	-28.6689301561457*
347.431	-0.102382	-5.23622	-9.98905	-15.8444	-20.8705	-25.5076		349.301	1.03812	-4.0259	-8.43703	-12.9774	-16.694	-23.2628	-27.0061297725454*
347.63	-0.0293175	-5.63596	-9.81014	-15.7943	-20.8068	-26.0849		349.5	0.957626	-3.93675	-8.44291	-13.1769	-17.441	-23.9346	-27.0835548824957*
347.83	-0.0955593	-5.86742	-9.97803	-15.7799	-20.9297	-25.799		349.7	0.765391	-4.10187	-8.50108	-13.3967	-17.2055	-24.0521	-27.9710666159904*
348.03	-0.236828	-5.41077	-10.4465	-15.659	-20.9745	-25.9672		349.9	0.755891	-3.8212	-8.32868	-13.4388	-17.9749	-24.5768	-28.4337514131008*
348.23	-0.227608	-5.22531	-10.2781	-15.9234	-20.8584	-25.405		350.1	0.667651	-3.28727	-8.39191	-13.6021	-18.5267	-24.2905	-27.7872645949957*
348.43	-0.104515	-5.63282	-10.1317	-15.8548	-20.8526	-25.2287		350.3	0.641092	-3.43882	-8.49549	-13.6046	-19.562	-24.5232	-29.1754499878935*
348.63	-0.231038	-5.03149	-10.4734	-15.866	-20.9524	-25.3627		350.5	0.426316	-3.56846	-8.54051	-13.7229	-19.5994	-24.3798	-29.3330714822551*
348.829	-0.318372	-5.05713	-10.3821	-15.8459	-20.9783	-25.3725		350.699	0.414517	-3.6749	-8.68363	-13.8144	-19.7389	-25.1192	-29.3388478325842*
349.029	-0.104915	-5.5045	-10.2199	-15.9012	-20.951	-25.5696		350.899	0.390877	-3.75478	-8.75291	-13.9192	-19.3998	-24.8549	-29.2765115558581*
349.229	-0.0729322	-5.35558	-9.18662	-15.9058	-20.7982	-25.6454		351.099	0.304369	-3.75212	-8.59293	-13.9913	-19.0786	-24.974	-29.3354511166158*
349.429	-0.16844	-4.61393	-10.026	-15.7753	-20.7598	-25.7257		351.299	0.239348	-3.67665	-8.87195	-14.1127	-19.6578	-25.1039	-29.5860941852228*
349.629	-0.139969	-5.55154	-10.2711	-15.6566	-20.8703	-25.9185		351.499	0.279323	-3.72462	-8.77247	-14.335	-20.1324	-25.1115	-30.0135467500727*
349.829	-0.0169737	-5.88802	-9.88005	-15.8101	-20.8251	-25.9643		351.699	0.0956435	-3.75843	-8.82103	-14.1059	-19.8379	-25.0657	-30.09146411433*
350.029	-0.180233	-5.23773	-10.208	-15.8591	-20.8306	-25.4371		351.899	0.157884	-3.78036	-8.88851	-14.2438	-19.5009	-25.2026	-29.4968227582558*
350.228	-0.0875929	-5.42178	-10.2895	-15.9211	-20.9753	-25.7125		352.098	-0.0459329	-3.8116	-8.86128	-14.1924	-19.5947	-25.4396	-29.9424000243893*
350.428	-0.206891	-5.095	-10.4589	-16.046	-20.9048	-25.3845		352.298	0.144344	-3.83772	-8.68814	-14.0921	-19.3295	-24.8238	-29.3338747765839*
350.628	-0.126711	-5.19231	-10.4732	-15.8403	-20.8807	-25.9407		352.498	0.313977	-3.87468	-8.30862	-14.0072	-18.8143	-24.5548	-29.5726353662834*
350.828	-0.0500402	-5.25698	-10.2015	-15.9447	-20.9682	-25.5758		352.698	0.169717	-3.92627	-8.57835	-13.9556	-19.477	-24.8423	-28.3343071231577*
351.028	-0.0819226	-5.16789	-10.4696	-15.9943	-20.9301	-25.4214		352.898	0.110451	-4.06088	-8.54964	-14.1253	-19.8175	-24.8924	-28.8674866834499*
351.228	0.114668	-5.64477	-9.44576	-15.7238	-20.9638	-25.9525		353.098	0.198357	-3.80531	-8.71714	-14.1549	-19.7972	-25.5113	-29.2571597133194*
351.427	-0.0656485	-5.00765	-10.2452	-15.8367	-20.9324	-25.7325		353.297	0.130107	-3.95822	-8.83282	-14.2848	-19.5952	-25.4811	-29.0072851417501*
351.627	-0.0534553	-4.86031	-10.358	-15.8696	-20.8548	-25.7827		353.497	-0.0382761	-4.12032	-8.82954	-14.3395	-20.0901	-25.1035	-29.9574422337921*
351.827	0.247657	-2.89699	-9.8597	-15.4109	-20.4958	-24.8158		353.697	-0.0751608	-4.20081	-8.9547	-14.3328	-19.537	-25.502	-30.2376297946089*
352.027	-0.0272802	-3.05761	-9.70084	-15.4595	-20.5707	-24.8691		353.897	-0.0721947	-4.15228	-9.08322	-14.3803	-19.8709	-25.5487	-29.817863203116*
352.227	0.0362955	-3.8419	-9.68081	-15.7519	-20.792	-24.5905		354.097	-0.233239	-4.27049	-9.20625	-14.3532	-20.188	-25.3121	-30.4016730949352*
352.427	-0.0850204	-4.0287	-9.54323	-15.5383	-20.7356	-25.2258		354.297	-0.250066	-4.12115	-9.39289	-14.4201	-20.9006	-25.5345	-30.1837573335108*
352.626	-0.0955075	-4.48698	-9.19801	-15.5288	-20.7841	-25.4601		354.496	-0.226325	-4.02573	-9.49077	-14.5947	-20.2891	-25.6835	-29.9789182144242*
352.826	-0.0349341	-4.64414	-9.34939	-15.5261	-20.7804	-25.2759		354.696	-0.27118	-4.3333	-9.49881	-14.4561	-20.1927	-25.1962	-30.4231255112056*
353.026	-0.135385	-4.54192	-9.78732	-15.3462	-20.8123	-25.236		354.896	-0.294932	-4.32588	-9.40315	-14.6038	-20.0292	-25.4463	-30.4328464642635*
353.226	0.0205204	-4.40251	-9.93898	-15.344	-20.8538	-25.2976		355.096	-0.0901789	-3.96603	-9.54968	-14.8558	-19.4292	-25.753	-30.713067685205*
353.426	-0.29306	-4.37695	-9.90546	-15.5959	-20.8259	-25.0276		355.296	0.0392472	-4.13716	-9.73412	-14.9465	-20.0634	-25.9716	-30.717028890563*
353.626	0.00167941	-4.6662	-10.1511	-15.5031	-20.8743	-25.2297		355.496	-0.299661	-4.19994	-9.82649	-14.8008	-19.7756	-26.4052	-30.1582346576269*
353.825	-0.180086	-4.87705	-10.0126	-15.5393	-20.8688	-25.2873		355.695	-0.275439	-4.28351	-9.96181	-14.9626	-19.8179	-25.8663	-30.4605626203722*
354.025	-0.0815697	-5.06961	-9.90075	-15.5923	-20.7363	-25.5207		355.895	-0.225008	-3.98511	-10.042	-14.9305	-19.5164	-25.9762	-30.6485152986433*
354.225	0.0945423	-4.9208	-9.89771	-15.4389	-20.7632	-25.5921		356.095	-0.0532441	-4.09772	-10.0811	-15.0547	-19.0648	-26.2094	-30.7396530430684*
354.425	-0.0288995	-5.26784	-9.81358	-15.6793	-20.8254	-25.5057		356.295	-0.523007	-4.23835	-9.9152	-14.8374	-19.5457	-25.6258	-30.2483364434824*
354.625	-0.0819895	-5.04017	-10.0239	-15.628	-20.8519	-25.3008		356.495	-0.599768	-4.38049	-10.0986	-14.8576	-19.5319	-25.4319	-30.6800405072487*
354.825	-0.0625339	-4.91017	-10.0938	-15.7104	-20.8548	-25.6218		356.695	-0.580019	-4.50661	-10.1895	-14.9257	-20.3975	-25.6533	-30.1487569217137*
355.024	-0.118038	-5.05769	-10.1696	-15.5157	-20.8385	-25.285		356.894	-0.559898	-4.29134	-10.2661	-14.8267	-20.084	-25.7464	-30.8853524851326*
355.224	-0.24937	-5.45262	-10.1602	-15.5198	-20.8714	-25.3293		357.094	-0.407068	-3.74541	-10.7408	-14.9479	-19.0522	-25.5874	-30.559513607541*
355.424	-0.00104975	-5.50154	-9.65179	-15.5025	-20.8549	-25.8464		357.294	-0.222116	-3.87431	-10.7516	-14.8062	-18.6524	-25.8236	-29.6016212823688*
355.624	0.183867	-5.27716	-10.1371	-15.3458	-20.9478	-25.5796		357.494	-0.533418	-4.24958	-10.9764	-15.072	-19.2664	-25.4875	-28.3882809057799*
355.824	-0.00805936	-5.58395	-9.54597	-15.4391	-20.8892	-26.0637		357.694	-0.54005	-4.38168	-10.6873	-14.9327	-19.259	-25.9046	-26.9487620031541*
356.024	0.182254	-6.22083	-9.5758	-15.5699	-20.8504	-25.4819		357.894	-0.183177	-4.60253	-10.6192	-15.0974	-19.1473	-25.6588	-26.3965676564374*
356.224	0.0416328	-5.60654	-9.86728	-15.6229	-20.8789	-25.8139		358.094	0.0989435	-4.09117	-10.689	-14.7967	-18.0867	-25.5317	-25.6490308694647*
356.423	-0.0988896	-5.72259	-9.92475	-15.5421	-20.8906	-25.6948		358.293	0.434618	-4.88668	-10.069	-13.0286	-18.4135	-22.4693	-25.8185505356297*
356.623	-0.0138622	-5.74141	-10.064	-15.6607	-20.9251	-25.5126		358.493	1.17657	-4.76062	-10.2895	-13.7936	-18.4187	-23.3828	-26.2155444152017*
356.823	-0.0753781	-5.3776	-9.91655	-15.6542	-20.8951	-25.423		358.693	1.20563	-4.49078	-10.4402	-14.033	-18.6681	-24.3113	-27.0477113982899*
357.023	-0.226854	-5.44998	-10.3407	-15.5901	-20.8262	-25.392		358.893	0.617705	-5.0142	-10.4258	-13.8537	-19.0684	-23.7394	-28.0680932902158*
357.223	-0.0544704	-5.27395	-10.4603	-15.3783	-20.9144	-25.1303		359.093	2.19081	-4.53971	-9.5452	-13.0321	-15.7406	-22.1802	-26.3865765126483*
357.423	-0.0212306	-5.75216	-10.3152	-15.6531	-20.9507	-25.3024		359.293	1.77083	-4.85434	-9.43149	-13.0827	-17.1901	-22.5723	-26.825381725573*
357.622	-0.0714064	-5.35671	-10.0202	-15.6042	-20.9226	-25.7215		359.492	2.034	-4.59174	-9.42004	-13.5629	-17.1512	-22.9637	-27.5469820218171*
357.822	0.159605	-5.36283	-9.74513	-15.5271	-20.803	-25.2878		359.692	2.2041	-4.53912	-9.37332	-12.9591	-16.8333	-22.0965	-27.5949454252698*
358.022	-0.0231083	-5.57768	-10.2224	-15.6717	-20.9273	-25.0948		359.892	2.52069	-4.62905	-9.42328	-13.0418	-16.6266	-22.1797	-28.5377921295401*
358.222	-0.0187833	-5.2011	-9.99962	-15.5968	-20.9359	-25.5043		360.092	2.4943	-4.32993	-9.43886	-13.2194	-17.2424	-22.7575	-28.1939660090623*
358.422	-0.0108278	-4.91732	-10.0785	-15.6677	-20.901	-25.674		360.292	2.28426	-4.57992	-9.56446	-13.1208	-18.1579	-23.4038	-28.4578441022656*
358.622	-0.180872	-4.84973	-10.3055	-15.6544	-20.8686	-25.5123		360.492	2.1168	-4.68474	-9.3733	-13.3198	-17.7851	-23.3282	-29.2216198525363*
358.821	-0.209928	-5.0372	-10.187	-15.6	-20.9491	-25.6465		360.691	2.19086	-4.30041	-9.79329	-13.4076	-18.4571	-23.8342	-29.2314847708576*
359.021	-0.176156	-5.44705	-10.2053	-15.6323	-20.9452	-25.4826		360.891	2.0295	-4.45931	-9.78755	-13.3795	-18.9044	-23.7607	-29.3881601427934*
359.221	0.19206	-5.77368	-9.59216	-15.4594	-20.8074	-25.8319		361.091	1.80119	-4.51403	-9.95033	-13.6066	-18.1502	-24.3186	-29.6768982850328*
359.421	0.0016047	-5.32223	-10.2304	-15.567	-20.9186	-25.7528		361.291	1.52968	-4.52494	-9.87914	-13.5129	-18.7471	-24.6286	-30.7798334524031*
359.621	-0.0311191	-4.93049	-10.0726	-15.6189	-20.8572	-26.0177		361.491	1.53294	-4.40678	-10.0505	-13.7071	-18.4854	-24.2924	-30.4018632291534*
359.821	-0.177952	-5.08508	-10.2039	-15.5939	-20.8974	-25.3999		361.691	0.510275	-4.54552	-9.25554	-13.1069	-17.991	-23.5537	-28.3000661338105*
360.021	-0.0620437	-5.17707	-10.0918	-15.7896	-20.9641	-25.2205		361.89	2.2584	-3.52276	-8.43462	-11.7502	-15.069	-20.6631	-27.1966779193555*
360.22	-0.214672	-5.34113	-10.2976	-15.7106	-20.9281	-25.3334		362.09	3.21961	-2.35164	-8.71009	-12.3703	-13.2378	-21.63	-28.014418809784*
360.42	-0.246741	-4.98311	-10.4671	-15.7345	-20.8936	-25.5283		362.29	2.89602	-1.99054	-8.9284	-12.521	-15.0779	-22.5621	-29.0947573440753*
360.62	-0.0249906	-4.72526	-9.93697	-15.8042	-20.9637	-25.918		362.49	2.71836	-2.04172	-9.01205	-12.5593	-16.341	-22.6748	-28.967129977509*
360.82	-0.0960876	-5.58434	-10.0451	-15.7031	-20.7749	-25.2462		362.69	2.78091	-2.09904	-9.08299	-12.8825	-17.0396	-23.3657	-29.0964201087518*
361.02	-0.0150422	-4.85352	-10.119	-15.9486	-20.9239	-25.8719		362.89	2.15062	-2.64683	-8.96506	-12.8489	-16.6758	-23.74	-29.9457611243067*
361.219	0.0400682	-4.9306	-10.3447	-15.7266	-20.868	-25.8767		363.089	1.17779	-3.52838	-8.73962	-12.4601	-19.314	-23.6168	-28.8542621207842*
361.419	0.0483783	-5.22351	-10.0026	-15.7343	-20.9073	-25.5617		363.289	0.232059	-3.9613	-8.86821	-11.9575	-19.8365	-22.8546	-29.4962546299338*
361.619	-0.0845573	-5.18581	-10.2227	-15.7681	-20.9032	-25.8237		363.489	2.02907	-2.61666	-9.476	-13.2798	-17.4362	-24.6542	-29.6972556100821*
361.819	-0.0134919	-5.13996	-10.1301	-15.8955	-20.9287	-25.1326		363.689	1.72547	-2.79646	-9.43189	-12.9857	-18.9468	-24.4857	-30.2515557614959*
362.019	-0.0530476	-4.81511	-10.4151	-15.7498	-20.8194	-25.5132		363.889	-0.110903	-4.1512	-9.17287	-12.3212	-20.9358	-23.8907	-29.8345486861637*
362.219	-0.167539	-4.92957	-10.34	-15.8468	-20.883	-25.7019		364.089	0.776882	-3.67158	-9.30186	-12.9819	-19.7648	-24.3512	-30.1979606552773*
362.419	-0.0811535	-5.03021	-10.4787	-15.9273	-20.895	-25.7623		364.289	0.568192	-3.46783	-9.26983	-12.9795	-19.5405	-24.6045	-30.4493433368959*
362.618	-0.0130626	-5.04983	-9.99774	-15.7564	-20.8158	-26.0918		364.488	0.555734	-3.85389	-9.24682	-12.7822	-19.8259	-24.1224	-30.5103689156557*
362.818	-0.0288686	-5.0055	-9.86371	-15.6642	-20.891	-25.6152		364.688	0.57731	-3.75164	-9.36319	-13.1068	-20.1522	-24.5133	-30.7163033784144*
363.018	-0.118928	-5.18098	-10.3687	-15.7465	-20.8999	-25.5151		364.888	0.720598	-3.86093	-9.2855	-13.2981	-20.6173	-24.8434	-30.4339904536389*
363.218	-0.0210578	-4.836	-10.5281	-15.7577	-20.9468	-25.3929		365.088	0.494854	-3.75924	-9.29847	-13.2299	-19.7799	-24.95	-30.542335799682*
363.418	-0.11127	-4.69272	-10.2496	-15.7159	-20.9292	-25.4429		365.288	0.47006	-3.69816	-9.38874	-13.3776	-19.9634	-24.9664	-30.9226640511312*
363.618	0.0284752	-4.75337	-10.3471	-15.699	-20.8323	-25.333		365.488	0.393206	-3.88029	-9.50078	-13.4967	-20.2273	-24.9412	-30.3444440598419*
363.817	-0.0471567	-5.15055	-10.1375	-15.7555	-20.9307	-25.7023		365.687	0.301741	-3.7033	-9.46324	-13.4704	-20.0144	-24.9704	-31.2664542371515*
364.017	-0.0166329	-4.96756	-10.5639	-15.5522	-20.8264	-26.1115		365.887	0.688309	-3.56939	-9.5593	-13.4042	-19.6891	-24.9254	-29.2411152054718*
364.217	0.202865	-5.40289	-10.0268	-15.753	-20.9301	-26.0383		366.087	0.327069	-4.05281	-9.7691	-13.4301	-20.2945	-25.0459	-29.5813840420889*
364.417	0.0280364	-4.80154	-10.2321	-15.6148	-20.9252	-25.6348		366.287	0.176298	-4.00817	-9.60916	-13.4071	-19.6933	-25.2004	-29.1196028373817*
364.617	-0.145206	-5.30589	-11.0988	-15.7489	-20.9732	-26.0068		366.487	0.926896	-3.41083	-9.87558	-13.8813	-19.8478	-25.3747	-30.2469468261696*
364.817	-0.295399	-4.94792	-10.6952	-15.937	-20.8647	-25.935		366.687	1.04824	-3.06352	-10.1196	-13.9694	-18.8211	-25.9201	-30.5375101204442*
365.017	-0.181979	-4.9171	-10.6641	-15.9756	-20.8488	-25.6772		366.887	1.25317	-3.18266	-10.29	-14.088	-19.448	-25.5408	-30.1939463897362*
365.216	0.0586396	-5.04602	-10.4424	-15.9006	-20.8906	-25.616		367.086	0.668206	-3.66949	-9.88331	-13.9236	-18.9609	-25.8261	-30.8596450197124*
365.416	0.106269	-5.14328	-10.0385	-15.7533	-20.9005	-26.0238		367.286	1.04186	-3.30637	-9.78915	-14.0985	-19.6401	-25.932	-30.3058331675408*
365.616	-0.0207074	-5.16698	-10.3446	-15.7474	-20.9483	-25.8541		367.486	0.96409	-3.2914	-10.0529	-14.0096	-19.9032	-25.5188	-30.5560259182625*
365.816	-0.0485135	-4.98308	-10.5307	-15.7833	-20.9779	-25.8215		367.686	0.880249	-3.29857	-10.326	-14.1897	-19.5854	-25.8453	-30.7480844494546*
366.016	-0.166139	-5.00771	-10.5436	-15.8582	-20.95	-25.4678		367.886	0.817758	-3.24481	-10.1526	-14.1334	-19.6655	-26.0103	-30.613758945494*
366.216	-0.240561	-4.75709	-10.5426	-15.7586	-20.8951	-25.4421		368.086	0.912053	-3.41884	-10.1467	-14.1346	-19.4638	-26.1449	-31.1564643210938*
366.415	0.0450978	-4.97123	-10.7081	-15.8114	-20.8553	-25.61		368.285	0.807417	-3.26403	-10.1601	-14.1763	-19.4482	-25.733	-30.4761761421629*
366.615	0.00753193	-5.14281	-9.92524	-15.7113	-20.9578	-25.4577		368.485	0.881284	-3.41847	-10.1883	-14.1348	-19.6713	-25.5411	-30.7276295555302*
366.815	0.0394199	-5.47587	-9.9022	-15.6334	-20.8327	-25.266		368.685	0.853137	-3.36967	-10.506	-14.1252	-19.5792	-26.0076	-30.7609121410547*
367.015	-0.1039	-5.35168	-10.3154	-15.6507	-20.8771	-24.938		368.885	0.840378	-3.48618	-10.4293	-14.2472	-19.6931	-25.7755	-31.2005679544295*
367.215	-0.0359069	-5.29257	-10.5135	-15.6161	-20.9226	-25.681		369.085	0.791068	-3.44101	-10.3471	-14.4132	-19.9812	-25.9005	-31.4202910143769*
367.415	-0.197359	-4.62121	-10.6711	-15.7686	-20.947	-25.6294		369.285	0.542133	-3.46611	-10.31	-14.4817	-19.3587	-25.5537	-30.9839197923657*
367.614	-0.111669	-4.69159	-10.4387	-15.7639	-20.8791	-25.4382		369.484	0.76189	-3.47538	-10.319	-14.5425	-19.6537	-26.26	-30.8444090371589*
367.814	-0.188682	-4.61107	-10.516	-15.8506	-20.8902	-25.2244		369.684	0.810767	-3.40368	-10.4358	-14.4081	-19.1096	-26.4988	-30.5170010974001*
368.014	-0.149647	-4.54079	-10.536	-15.7029	-20.8933	-25.6036		369.884	0.409893	-3.58717	-10.3216	-14.3376	-19.5328	-25.8243	-31.2346001600298*
368.214	0.102946	-4.43321	-10.3756	-15.7594	-20.8895	-25.4719		370.084	-0.0585761	-4.1123	-10.2268	-14.2846	-20.3447	-25.2613	-31.1320743766381*
368.414	0.193758	-5.37527	-10.1325	-15.4797	-20.8517	-25.3942		370.284	-0.0721345	-4.31577	-10.0553	-14.4347	-20.4793	-25.6175	-30.9016317041204*
368.614	-0.00949028	-5.29971	-10.5309	-15.7063	-20.865	-25.4541		370.484	-0.308401	-4.26762	-10.3154	-14.3302	-20.3067	-25.4612	-31.0006861734295*
368.813	-0.229616	-4.66713	-10.5441	-15.5849	-20.891	-25.4441		370.683	-0.055086	-3.94967	-10.4252	-14.6326	-19.7943	-25.7039	-31.3118697056198*
369.013	-0.15876	-5.14086	-10.7159	-15.6521	-20.8812	-25.2838		370.883	-0.231705	-4.28518	-10.4527	-14.4685	-20.4159	-25.7945	-30.8087829791644*
369.213	-0.256847	-4.88882	-10.6713	-15.7777	-20.8102	-25.0182		371.083	-1.39757	-5.46928	-10.3095	-14.0278	-20.8699	-25.3595	-30.6788935612408*
369.413	-0.0619653	-4.64969	-10.9236	-15.7338	-20.7924	-25.1866		371.283	-0.791828	-4.72105	-10.3836	-14.3968	-21.3798	-25.2312	-31.2129576095411*
369.613	0.129723	-5.32994	-10.1401	-15.4022	-20.8792	-25.7195		371.483	-0.947376	-5.16671	-10.3337	-14.3361	-20.6132	-25.3972	-30.4086703070866*
369.813	0.167108	-5.8548	-9.85611	-15.5181	-20.8275	-25.7456		371.683	-0.256712	-4.54941	-10.2705	-14.7986	-19.1706	-26.2279	-30.3783297984129*
370.012	0.102344	-5.80801	-10.2343	-15.3803	-20.9073	-26.3956		371.882	-0.937219	-4.96649	-10.3846	-14.3882	-20.8579	-25.0889	-30.3564752801115*
370.212	-0.113154	-5.33226	-10.0418	-15.6581	-20.8422	-25.8619		372.082	-0.794902	-4.8306	-10.4117	-14.5721	-20.4188	-24.9282	-30.3134762901945*
370.412	-0.0988274	-4.65036	-10.4601	-15.6576	-20.891	-25.6619		372.282	-0.682282	-4.85991	-10.303	-14.5591	-20.3517	-25.5619	-30.5820795371279*
370.612	-0.257658	-4.61016	-11.0074	-15.7042	-20.9679	-25.383		372.482	0.11822	-4.8588	-10.0173	-13.9078	-19.8054	-24.0291	-30.3834525055084*
370.812	-0.225222	-4.79748	-10.8684	-15.719	-20.8317	-25.4555		372.682	0.522399	-4.84012	-10.3174	-13.4663	-20.5728	-23.4691	-30.219451280338*
371.012	-0.0641001	-5.93021	-10.2118	-15.6537	-20.905	-25.6146		372.882	0.435137	-4.84942	-10.2659	-13.6863	-20.5401	-23.8619	-30.9881223044289*
371.212	0.0895719	-5.42966	-10.1232	-15.8322	-20.8392	-25.3022		373.082	0.52482	-4.78551	-10.1128	-13.6649	-20.4836	-24.1024	-29.8112274279258*
371.411	-0.256805	-4.45895	-10.7115	-15.8017	-20.7784	-25.658		373.281	1.66201	-4.43949	-10.0955	-12.6442	-20.4662	-21.9618	-28.1100021924437*
371.611	-0.204342	-4.30677	-10.6484	-15.6833	-20.9047	-25.7638		373.481	1.58005	-4.47172	-10.2136	-12.9974	-20.0742	-22.6338	-28.7202063526882*
371.811	-0.0986797	-3.65634	-9.4418	-15.6869	-20.6588	-24.9464		373.681	1.25773	-4.57873	-10.1807	-13.0079	-20.0526	-23.1285	-28.9417900442618*
372.011	-0.17307	-3.53657	-9.16296	-15.454	-20.6983	-25.4047		373.881	1.24971	-4.42858	-10.2219	-13.235	-20.4071	-23.0515	-29.2945511083977*
372.211	-0.182528	-3.59466	-9.40483	-15.5743	-20.7131	-25.6122		374.081	1.02014	-4.64438	-10.1462	-13.2398	-20.3931	-23.3246	-29.2269267805849*
372.411	-0.0167581	-4.14286	-9.48134	-15.2787	-20.7885	-25.3214		374.281	1.04996	-4.60069	-10.2624	-13.5759	-20.7329	-24.0283	-30.0129791607676*
372.61	-0.0847688	-4.6638	-8.93341	-15.46	-20.7656	-25.3373		374.48	0.922656	-4.51719	-10.3286	-13.5277	-20.2798	-24.3824	-29.7850606155192*
372.81	-0.396307	-3.93047	-10.0006	-15.6236	-20.8066	-25.663		374.68	0.728765	-4.68079	-10.1379	-13.5677	-20.7431	-24.0376	-29.6991389850358*
373.01	-0.474863	-2.83916	-10.0873	-15.9243	-20.7635	-25.373		374.88	0.798448	-4.64693	-10.2873	-13.7444	-20.3105	-24.8444	-29.8176821889721*
373.21	-0.716131	-3.55026	-9.50644	-15.7053	-20.667	-25.4865		375.08	0.66038	-4.5851	-10.276	-13.6573	-20.8585	-24.2327	-29.5074502603495*
373.41	-0.280623	-4.13594	-9.55058	-15.6452	-20.7984	-25.377		375.28	0.660446	-4.63975	-10.3105	-13.8206	-20.6936	-24.5036	-29.392462952931*
373.61	-0.23062	-4.40455	-9.78253	-15.8152	-20.8596	-25.293		375.48	0.522817	-4.63855	-10.3965	-13.8369	-20.285	-25.083	-29.2957876631161*
373.809	-0.241074	-4.76716	-10.0336	-15.7204	-20.9365	-25.6275		375.679	0.404811	-4.56979	-10.341	-13.9483	-19.9159	-25.0125	-29.8449778436979*
374.009	-0.228572	-4.2841	-9.97694	-15.8494	-20.9219	-25.6292		375.879	0.313557	-4.72704	-10.5503	-14.0013	-20.7129	-25.0637	-29.7220183176763*
374.209	0.21007	-5.62799	-9.66122	-15.605	-20.9676	-26.1216		376.079	0.353616	-4.81842	-10.5565	-14.0357	-20.6736	-25.2845	-29.7170793766673*
374.409	0.443011	-6.21917	-9.3413	-15.5366	-20.8154	-25.3142		376.279	0.285373	-4.9008	-10.5035	-13.9761	-20.5708	-25.2833	-29.8515842572522*
374.609	0.0254999	-5.34861	-9.52809	-15.54	-20.7843	-25.9863		376.479	0.0708146	-4.85274	-10.5648	-14.0663	-20.7548	-25.0717	-30.2869193614906*
374.809	-0.0473093	-4.66556	-9.97773	-15.7379	-20.8439	-25.6033		376.679	-0.215721	-5.28746	-10.3237	-14.0722	-21.1746	-25.0612	-28.7096473080104*
375.009	-0.0149259	-5.29105	-9.63246	-15.5884	-20.8615	-25.6843		376.878	0.153173	-4.9761	-10.2554	-14.3699	-20.5484	-25.445	-28.3243407695956*
375.208	-0.0563431	-4.87883	-10.1296	-15.6363	-20.8452	-25.339		377.078	0.00336888	-5.18258	-10.2468	-14.2577	-20.173	-25.6604	-29.2280439328338*
375.408	-0.0357758	-5.36287	-9.80395	-15.6464	-20.8799	-25.5202		377.278	-0.241941	-5.10416	-10.2578	-14.2935	-19.9625	-25.1295	-28.6311521244993*
375.608	-0.0696263	-4.8383	-9.77774	-15.5379	-20.9267	-25.4731		377.478	-0.186976	-4.81365	-10.4385	-14.3772	-20.4674	-25.4982	-30.0658454161172*
375.808	-0.0336578	-4.99662	-10.3645	-15.545	-20.9019	-25.3504		377.678	-0.249058	-5.01573	-10.3016	-14.6181	-20.1543	-25.3125	-30.0363274426273*
376.008	-0.186803	-5.63459	-10.1852	-15.5787	-20.9181	-25.9183		377.878	0.391129	-4.77083	-9.74226	-13.9487	-19.2814	-23.7142	-26.9359734300774*
376.207	0.196308	-5.90093	-9.87412	-15.4432	-20.9077	-25.9482		378.077	0.510576	-4.78426	-9.77801	-13.8113	-19.7304	-24.0999	-27.3922887308765*
376.407	0.12784	-5.80262	-10.1468	-15.4209	-20.9801	-25.7342		378.277	-0.0452066	-5.03133	-9.86783	-13.8382	-20.6951	-24.107	-28.0694064899481*
376.607	-0.221271	-5.44088	-10.2856	-15.5351	-20.8925	-25.9243		378.477	-0.290133	-5.20962	-10.0332	-13.8834	-20.9376	-24.35	-28.5074900570899*
376.807	-0.104668	-5.32366	-9.96266	-15.6101	-20.9204	-25.6784		378.677	-0.291432	-5.24417	-10.0059	-13.981	-21.5782	-24.9634	-27.5503161936347*
377.007	-0.258962	-4.75448	-10.1265	-15.6111	-20.9514	-25.3739		378.877	0.370706	-4.66261	-9.90111	-14.3612	-20.2253	-25.327	-26.9934276241133*
377.207	-0.120593	-4.90337	-10.5096	-15.6791	-20.9472	-25.5396		379.077	0.110147	-5.02197	-10.1688	-14.1677	-20.4286	-25.908	-27.6792503918015*
377.407	-0.171777	-5.43087	-10.0453	-15.7912	-20.8971	-25.5749		379.277	-0.00945996	-4.87651	-10.0869	-14.1887	-20.803	-25.4028	-27.585238573075*
377.606	0.243726	-5.83734	-8.99723	-15.6105	-20.9108	-25.8647		379.476	0.49543	-4.45741	-10.2376	-14.6809	-19.9226	-25.822	-28.6935652736724*
377.806	-0.0361929	-5.3056	-9.38778	-15.6211	-20.8303	-25.7688		379.676	-0.36611	-5.25564	-9.91289	-14.399	-19.8781	-25.1468	-28.5861621836893*
378.006	0.331491	-6.25157	-9.49322	-15.6217	-21.1124	-25.9439		379.876	0.207257	-5.03724	-9.32012	-13.7519	-19.4888	-24.0352	-26.9316612951755*
378.206	-0.0118198	-5.24207	-10.3638	-15.7237	-21.0258	-25.9195		380.076	1.18953	-4.94605	-9.34694	-13.2164	-20.1398	-23.303	-27.9612863028476*
378.406	-0.267437	-4.64135	-10.4415	-15.6362	-20.8062	-25.8653		380.276	0.796034	-4.98218	-9.30129	-13.3733	-20.0867	-23.2553	-28.16532124289*
378.606	-0.233343	-5.41672	-10.0747	-15.8147	-20.8521	-25.8068		380.476	0.790567	-4.95143	-9.35349	-13.6924	-19.7291	-23.8372	-28.7682539064529*
378.805	-0.284514	-4.57946	-10.0625	-15.8594	-20.9037	-25.9587		380.675	0.587965	-5.15568	-9.40651	-13.6171	-20.391	-24.0987	-28.3328008325746*
379.005	-0.130624	-5.2158	-10.1749	-15.799	-20.9629	-25.9772		380.875	0.394754	-5.23971	-9.38833	-13.6754	-20.892	-24.2391	-28.0840873078763*
379.205	0.0150493	-5.2113	-10.2138	-15.8429	-20.9377	-25.7214		381.075	0.614343	-4.90801	-9.51042	-14.1587	-20.0883	-24.6219	-29.1219547248828*
379.405	-0.22224	-5.55786	-10.6317	-15.9979	-21.0442	-25.6883		381.275	1.2115	-4.23708	-9.92425	-14.2123	-18.9348	-25.3466	-29.6010538363466*
379.605	-0.159548	-5.28818	-10.1189	-15.908	-20.8932	-25.5797		381.475	1.21018	-4.25784	-9.94695	-14.28	-19.3165	-25.461	-29.8587851586452*
379.805	-0.286956	-4.58439	-10.2102	-15.9283	-20.7784	-25.4043		381.675	0.492529	-4.60973	-9.89837	-14.2578	-20.0422	-25.008	-30.2655342654696*
380.005	-0.112055	-4.80839	-9.92632	-15.7136	-20.8722	-26.2574		381.875	0.28547	-4.82757	-9.70683	-14.2139	-19.6001	-25.6595	-29.8535268330876*
380.204	0.0452105	-5.76842	-9.85063	-15.652	-20.9464	-26.035		382.074	0.56093	-4.59668	-9.77332	-14.4028	-19.4894	-25.3936	-29.8826088624751*
380.404	0.00353455	-5.53226	-10.1388	-15.6214	-20.9653	-26.2464		382.274	0.308478	-4.82691	-9.92918	-14.561	-19.7988	-25.3001	-30.6244669589672*
380.604	-0.163014	-5.15374	-9.97981	-15.8084	-21.0146	-26.1781		382.474	0.187292	-5.11575	-10.0639	-14.4909	-19.7766	-25.5021	-30.5029172918199*
380.804	-0.021978	-5.24513	-10.2422	-15.8559	-21.0517	-25.8046		382.674	0.176363	-5.04863	-9.98954	-14.6388	-19.9976	-25.5581	-30.3174356760863*
381.004	-0.108758	-5.3374	-10.2995	-15.7321	-20.9743	-25.9487		382.874	-0.194837	-5.60253	-9.90339	-14.5035	-20.1234	-25.3187	-30.1202405871121*
381.204	-0.101232	-5.15967	-10.4483	-15.7464	-20.9884	-25.7258		383.074	-0.107217	-5.13504	-9.98331	-14.59	-19.3054	-25.1055	-30.726695487068*
381.403	-0.0217743	-5.24191	-10.1379	-15.88	-20.993	-25.5231		383.273	-0.606693	-5.36815	-10.2497	-14.3776	-20.148	-25.1209	-30.3595028718738*
381.603	-0.0699766	-4.81072	-10.2626	-15.7642	-20.9653	-25.5272		383.473	-0.311331	-5.12648	-10.3268	-14.68	-20.6005	-25.5712	-30.579145647875*
381.803	-0.000445384	-5.13923	-9.41081	-15.6659	-20.8067	-25.5205		383.673	-0.465554	-5.1462	-10.1999	-14.6953	-20.7732	-25.5003	-30.5369099240304*
382.003	-0.337869	-4.56631	-10.2402	-15.9304	-20.8545	-25.2179		383.873	-0.629552	-5.60471	-10.2731	-14.6463	-20.9733	-25.1575	-29.9240056531968*
382.203	-0.103918	-5.20643	-10.5269	-15.7656	-20.9776	-26.6395		384.073	-0.129675	-5.15407	-10.495	-14.8938	-20.0704	-25.8871	-30.5874769836201*
382.403	-0.28135	-4.90831	-10.9631	-15.8986	-20.8908	-25.4912		384.273	-0.00972099	-4.6814	-10.4549	-14.835	-19.6273	-26.083	-30.4410424772097*
382.602	-0.187675	-5.22791	-10.5277	-15.8234	-20.9153	-25.8035		384.472	-0.100631	-4.81141	-10.7827	-14.9487	-19.5405	-26.2236	-30.6091402305369*
382.802	0.111724	-5.32741	-9.99957	-15.722	-21.0348	-25.6083		384.672	-0.419591	-5.0262	-10.5705	-14.7913	-20.5536	-25.9725	-30.7545476482755*
383.002	-0.245491	-4.79505	-10.1541	-15.8837	-21.0208	-25.3134		384.872	-0.212252	-5.03869	-10.7373	-14.962	-19.9951	-25.5968	-31.1625524824435*
383.202	-0.0893929	-5.47652	-10.0729	-15.9548	-20.9642	-25.5872		385.072	-0.405208	-4.96791	-10.6936	-14.9175	-19.6037	-26.1018	-31.0272042110433*
383.402	-0.105077	-5.04503	-9.67316	-15.8305	-20.9914	-26.5059		385.272	-0.791366	-5.09938	-10.6967	-14.9794	-20.6293	-25.6887	-30.8222916059911*
383.602	-0.190467	-5.19953	-9.28971	-15.8191	-20.9886	-26.4491		385.472	-1.01228	-5.37238	-10.7425	-14.8684	-20.5235	-25.0068	-30.8627347007589*
383.801	-0.225872	-5.5087	-10.1284	-15.8995	-21.0713	-25.7363		385.671	-1.03047	-5.32467	-10.6816	-14.8507	-21.0884	-25.5194	-30.4882344269923*
384.001	-0.346324	-5.36973	-10.0671	-15.8329	-21.0256	-26.0061		385.871	-0.44945	-4.86167	-10.6375	-15.1044	-20.2108	-26.1451	-30.4034952903378*
384.201	-0.287441	-5.26105	-10.3351	-15.9718	-21.002	-25.7846		386.071	-0.475091	-4.85104	-10.6574	-15.1349	-20.2871	-25.8247	-30.9179741495588*
384.401	-0.0995996	-5.45428	-10.2805	-15.8921	-20.9806	-25.6304		386.271	-0.50231	-4.91348	-10.6258	-15.2502	-21.9623	-26.0012	-30.466830908876*
384.601	-0.0536267	-5.06947	-10.3251	-15.8981	-20.8993	-25.6492		386.471	-0.408707	-4.96238	-10.5499	-15.1777	-20.3935	-25.7085	-30.6662571410254*
384.801	-0.181401	-5.20715	-10.3826	-15.9311	-20.9967	-25.6905		386.671	-0.520869	-4.86571	-10.5534	-15.3165	-19.9841	-26.0723	-30.3768803661486*
385	-0.143851	-5.32426	-10.7309	-15.9834	-20.9844	-25.6516		386.87	-0.658951	-4.91154	-10.6564	-15.2009	-20.7301	-25.8692	-30.6518224059012*
385.2	0.23797	-6.68378	-9.73686	-15.9398	-20.9828	-25.5761		387.07	-0.636473	-4.84377	-10.6346	-15.2231	-20.9003	-25.7927	-31.0153083135726*
385.4	0.212104	-5.66525	-10.1517	-15.9476	-20.9416	-25.988		387.27	-0.550739	-4.97736	-10.6783	-15.3122	-20.1042	-25.9905	-31.2487160337019*
385.6	-0.240353	-5.25855	-9.74326	-15.8567	-20.9612	-26.4495		387.47	-0.515809	-4.99655	-10.5873	-15.1904	-20.6001	-25.9471	-31.260058131147*
385.8	-0.146558	-5.16642	-10.0546	-15.8304	-20.9011	-25.7261		387.67	-0.538544	-4.92132	-10.6651	-15.3607	-20.051	-25.6967	-31.1115780898575*
386	-0.196052	-5.0006	-10.0988	-15.8491	-20.9389	-25.3987		387.87	-0.52281	-5.0103	-10.6221	-15.4036	-20.9202	-25.5739	-30.8298471668337*
386.2	-0.257607	-4.63793	-9.94673	-15.8703	-20.8989	-25.5251		388.07	-0.545464	-5.09881	-10.603	-15.2011	-20.2254	-25.6746	-30.9186873803105*
386.399	-0.104949	-4.96282	-10.2563	-15.6906	-20.8602	-25.5072		388.269	-1.33434	-5.34504	-10.8184	-15.0284	-20.6333	-25.8273	-30.6188532234301*
386.599	0.101408	-5.33002	-9.89604	-15.7527	-20.9513	-26.0552		388.469	-1.03524	-5.53905	-10.661	-15.1419	-20.6593	-25.7789	-30.9333031523219*
386.799	0.202736	-5.31219	-9.13608	-15.5973	-20.9107	-25.5784		388.669	-1.04396	-5.58742	-10.6266	-15.227	-21.1231	-25.2708	-30.7058100619532*
386.999	0.0612339	-5.63792	-10.1941	-15.7302	-20.8808	-25.6996		388.869	-1.06044	-5.66471	-10.655	-15.264	-20.5644	-25.1842	-30.9187214953018*
387.199	0.0221036	-5.26011	-10.0851	-15.6716	-20.9755	-25.8835		389.069	-0.499151	-4.9666	-10.6555	-15.6367	-20.8674	-25.9205	-30.8141287983031*
387.399	-0.330809	-5.30706	-9.77674	-15.8305	-20.9148	-25.437		389.269	-0.766558	-5.22638	-10.6709	-15.4728	-20.4218	-25.6626	-30.4210310781723*
387.598	-0.161655	-4.99522	-10.1457	-15.8779	-20.9303	-25.4573		389.468	-0.697884	-5.23491	-10.8025	-15.4266	-19.9681	-25.4197	-30.863183199178*
387.798	-0.153676	-5.17569	-10.2688	-15.8833	-20.9062	-25.4052		389.668	-0.650692	-5.14935	-10.76	-15.5635	-20.5126	-25.682	-30.374259652516*
387.998	-0.242116	-4.722	-10.1739	-15.8363	-20.8893	-25.8195		389.868	-0.653521	-5.14044	-10.6941	-15.5369	-20.4018	-25.5381	-30.8321872278045*
388.198	-0.0203358	-4.61143	-9.96946	-15.9162	-20.8862	-25.4865		390.068	-0.501032	-5.10339	-10.8464	-15.5767	-20.1378	-26.2997	-30.7052403415983*
388.398	0.131881	-5.77477	-9.26873	-15.7346	-20.8193	-25.7262		390.268	-0.365222	-5.20226	-10.9274	-15.6791	-19.8276	-26.0766	-31.8611993027994*
388.598	0.211351	-5.03432	-10.1534	-15.4059	-20.8962	-25.9492		390.468	-1.13481	-5.44199	-10.8134	-15.1771	-20.4417	-25.3397	-30.5234847652157*
388.797	0.167359	-6.30373	-10.1404	-15.5423	-20.9069	-26.3495		390.667	-0.766798	-5.21346	-10.7784	-15.4935	-19.8077	-25.7735	-30.6321130382535*
388.997	0.243868	-6.35064	-9.95251	-15.4702	-20.9783	-26.133		390.867	-0.828484	-5.56175	-10.8346	-15.4249	-20.0534	-25.6366	-30.3986550553704*
389.197	0.175329	-5.91346	-9.85144	-15.5963	-21.046	-26.0054		391.067	-0.925102	-5.79438	-10.8375	-15.5758	-20.2797	-25.4754	-30.4669000485917*
389.397	0.362733	-6.18681	-10.0881	-15.6299	-21.0284	-26.2124		391.267	-1.10264	-5.88565	-10.7475	-15.5311	-20.4582	-25.3851	-30.3134985786555*
389.597	0.0579957	-5.54086	-10.1846	-15.8297	-20.9335	-26.0594		391.467	-1.13095	-5.83512	-10.6889	-15.5312	-20.5987	-25.5644	-30.5499827887013*
389.797	0.0738671	-5.72798	-10.3018	-15.6605	-20.8977	-26.0639		391.667	-1.08143	-5.85578	-10.6056	-15.545	-20.8543	-25.4395	-30.6343093613942*
389.997	0.0382976	-5.36865	-10.4042	-15.66	-20.9456	-25.859		391.866	-1.32991	-5.76138	-10.6277	-15.5392	-20.8674	-25.5865	-30.2688989133462*
390.196	0.0529617	-5.46503	-10.506	-15.736	-20.9146	-26.0465		392.066	-0.852421	-5.62648	-10.2923	-15.4462	-19.6445	-25.3275	-29.5344279406129*
390.396	-0.0182187	-5.35117	-10.1602	-15.7988	-20.9558	-25.9594		392.266	-0.889704	-5.71993	-10.0654	-15.4357	-20.1568	-25.0798	-29.0450320150379*
390.596	0.00423572	-5.4924	-10.1538	-15.8128	-20.9494	-25.7756		392.466	-0.979012	-5.55085	-10.1281	-15.5738	-20.1076	-25.4853	-29.141668641196*
390.796	0.0909778	-5.3294	-10.2471	-15.8969	-21.0002	-25.6533		392.666	-0.917258	-5.51143	-10.1387	-15.4873	-19.6698	-25.5732	-29.8692764282069*
390.996	-0.0782806	-5.38418	-10.3043	-15.8736	-20.9082	-25.63		392.866	-0.915361	-5.44772	-10.0778	-15.3992	-20.3723	-25.7717	-30.474955735207*
391.195	0.00322185	-5.38307	-10.4693	-15.898	-20.9419	-25.7944		393.065	-0.822926	-5.36116	-9.96366	-15.641	-20.2523	-25.0728	-30.443391180645*
391.395	0.0290664	-5.6254	-10.6592	-15.8456	-20.9856	-26.123		393.265	-0.843624	-5.30712	-9.93647	-15.6021	-20.272	-25.3016	-30.0325198229602*
391.595	-0.0382055	-5.34202	-10.4517	-15.8266	-20.8658	-25.6323		393.465	-0.744632	-5.39071	-9.92412	-15.7233	-20.0856	-25.0082	-30.4190924369326*
391.795	0.0326154	-5.5826	-10.5152	-15.724	-20.9453	-25.6305		393.665	-0.822813	-5.30525	-9.82863	-15.7422	-19.7356	-25.6106	-30.4326056124248*
391.995	-0.0851604	-5.20787	-10.4284	-15.5022	-20.9562	-25.8099		393.865	-0.940124	-5.17851	-9.89555	-15.7237	-20.0623	-25.3986	-30.4702833459968*
392.195	0.117496	-5.5631	-9.92893	-15.7304	-20.8778	-25.5874		394.065	-0.951596	-5.31417	-9.92684	-15.7771	-19.9276	-25.3335	-30.5022361291601*
392.395	0.146824	-5.82795	-10.6729	-15.5456	-20.904	-25.9583		394.265	-0.87695	-5.18773	-9.79667	-15.8194	-20.2436	-25.4792	-30.1234405505539*
392.594	-0.13865	-5.40726	-10.2741	-15.6166	-20.9526	-26.1301		394.464	-0.845578	-5.14134	-9.84044	-15.7583	-20.833	-25.5008	-30.0483755839325*
392.794	-0.170002	-4.98083	-10.4008	-15.7986	-20.9677	-25.8436		394.664	-0.820618	-5.16438	-9.88381	-15.8594	-19.8548	-25.521	-30.3050376059434*
392.994	-0.0537027	-5.16809	-10.7147	-15.815	-20.9031	-25.2924		394.864	-0.822031	-5.10392	-9.75098	-15.797	-20.7301	-25.797	-30.5657618819165*
393.194	-0.0017524	-5.44591	-10.0828	-15.6641	-20.9338	-25.4026		395.064	-1.02452	-5.19081	-9.72083	-15.7866	-20.514	-25.5664	-30.357835785965*
393.394	-0.058933	-5.37762	-10.7101	-15.7883	-20.9444	-25.6196		395.264	-0.95863	-5.15892	-9.74748	-15.8551	-20.0937	-25.5139	-30.6131737596764*
393.594	-0.126487	-5.41769	-10.4094	-15.71	-20.9864	-25.8599		395.464	-0.848465	-5.15869	-9.78664	-15.8862	-20.2374	-25.4872	-30.5301724406794*
393.793	0.0610299	-4.92257	-10.5249	-15.7505	-20.9245	-25.9283		395.663	-0.870773	-5.13655	-9.8074	-15.7522	-20.6302	-25.3597	-31.2063902462802*
393.993	-0.044709	-5.27666	-10.4571	-15.71	-20.869	-25.6629		395.863	-0.897634	-5.19896	-9.77015	-15.8341	-20.2614	-25.7522	-30.1112851062293*
394.193	-0.0516274	-5.47784	-10.5824	-15.9189	-20.8589	-25.4659		396.063	-0.811922	-5.13783	-10.0585	-15.8536	-20.4922	-25.8691	-30.4011627346651*
394.393	-0.154864	-5.05759	-10.5712	-15.7855	-20.916	-25.9501		396.263	-0.861468	-5.25143	-10.1175	-15.9132	-20.6862	-26.0695	-30.5372797305362*
394.593	-0.129147	-5.15431	-10.61	-15.7795	-20.8528	-25.7578		396.463	-0.859672	-5.22141	-10.0341	-15.9089	-20.5356	-25.4982	-30.4937747015814*
394.793	-0.0148903	-4.94211	-10.3527	-15.6957	-20.8836	-25.6399		396.663	-0.873675	-5.34677	-10.0244	-15.9465	-20.1352	-26.0362	-30.4874677494208*
394.993	-0.164855	-4.88892	-10.4975	-15.7457	-20.7865	-25.4539		396.863	-0.84482	-5.22815	-9.93555	-15.9137	-20.4424	-25.8597	-30.2673735183679*
395.192	-0.0732384	-5.34267	-10.5326	-15.7188	-20.8082	-25.2851		397.062	-0.807621	-5.26672	-9.94974	-15.9041	-20.3413	-25.7381	-30.6566330745428*
395.392	0.130292	-5.23177	-10.3627	-15.7237	-20.9219	-25.7349		397.262	-0.951882	-5.15743	-10.0312	-15.8475	-20.1442	-25.6338	-30.5391001064726*
395.592	0.110533	-5.86476	-10.3182	-15.6576	-20.8431	-25.8278		397.462	-0.894543	-5.26894	-10.1007	-15.9233	-20.1264	-25.8383	-30.9726663938981*
395.792	0.0737239	-5.00036	-10.2949	-15.6913	-20.7594	-25.5527		397.662	-0.957983	-5.29033	-10.1086	-15.9128	-20.3119	-25.8744	-30.1407115378258*
395.992	-0.462946	-4.58852	-10.405	-15.8343	-20.817	-25.7754		397.862	-0.936097	-5.2453	-10.1646	-15.9389	-19.6203	-25.3373	-30.8125633750684*
396.192	-0.281292	-4.78111	-10.7376	-15.7916	-20.7758	-25.6463		398.062	-0.837572	-5.20993	-9.95576	-15.9536	-20.5494	-25.7688	-30.6705524458649*
396.391	-0.278619	-4.73495	-10.51	-15.7969	-20.7261	-25.4025		398.261	-0.827653	-5.13603	-9.95043	-15.9844	-20.0456	-25.7774	-30.6285714472887*
396.591	-0.292632	-5.03468	-10.4339	-15.7742	-20.792	-25.7292		398.461	-0.989048	-5.13	-10.0153	-15.9893	-20.4689	-25.9398	-31.2945602138943*
396.791	-0.133519	-4.4412	-10.4456	-15.5965	-20.8828	-25.5223		398.661	-0.906196	-5.23746	-9.96925	-16.0542	-20.7155	-25.4952	-30.7657735273168*
396.991	-0.305817	-4.73446	-10.4821	-15.7419	-20.8606	-25.368		398.861	-0.869769	-5.28891	-10.1724	-15.9748	-20.5672	-26.1263	-30.5980364831644*
397.191	-0.216567	-4.70136	-10.5261	-15.6978	-20.8669	-25.2873		399.061	-0.791237	-5.2828	-10.1385	-16.0032	-20.2217	-25.8421	-31.1170412645663*
397.391	-0.119558	-5.00932	-10.3525	-15.5751	-20.8031	-25.2463		399.261	-0.804796	-5.31804	-10.1449	-15.9506	-20.6301	-25.7883	-31.0127292202294*
397.59	-0.101871	-5.35252	-10.3524	-15.6203	-20.8978	-25.4216		399.46	-0.948667	-5.1193	-10.1377	-15.9883	-20.729	-25.8623	-30.4245788098355*
[truncated: 1,276 more rows]

## Sheet: 5J
	Full
	0.211111	0.161111	0.166667	0.044445	0.016667	0.061111	0.033333	0.011111	0.038889	0	0.011111	0.061111	0.15	0.116666	0.116667	0.083333	0.011111	0.094445	0.166667	0.094444	0.027778	0.161111	0.061111	0.061111	0.088889	0.072222	0.044444	0.005556	0.016667	0.011111	0*	0*	0.277778	0.127778	0.188889	0.083333	0.25	0.305556	0.277778	0.072222	0.166667	0.133333	0.111111	0.177778	0.105556	0.177778	0*	0.116667
	0.072222	0.088889	0.15	0.244444	0.244445	0.172222	0.2	0.116667	0.038889	0.022222	0.116667	0.15	0.044444	0.005556	0.127778	0.044444	0.066667	0.211111	0.166667	0.05	0.077778	0.166667	0.266667	0.016667	0.1	0.05	0.027778	0.094444	0.05	0.033333	0.033333	0.011111	0.005556
	Part
Males	0.122222	0.116667	0.194445	0.227778	0.188889	0.144445	0.083333	0.033333	0.205555	0.077778*	0.066666	0.044445	0.111111	0.027778	0.094444	0.094444	0.088889	0.1	0.022222	0.044444	0.05	0.016667	0.066667	0.005556	0	0.011111	0.027778	0	0.011111	0.311111	0.133333	0.133333	0.238889	0.105556	0.205556	0.216667	0.138889	0.055556	0.072222	0.011111	0.033333	0.138889	0.266667	0.144444
Females	0.111111	0.111111	0.088889	0.033333	0.127778	0.033334	0.127778	0.055555	0.111111	0.038889	0.088889	0.155556	0.15	0.061111	0.1	0.1	0.011111	0.094444	0.022222	0.027778	0.183333	0.038889	0.116667	0.138889	0.255556	0.094444	0.238889	0.183334	0.166667	0.105556	0.072222	0.166667	0.066667	0.05	0.155555	0.05	0.088889	0.016667	0.044444	0.111111	0.044445	0.133334	0.033333	0.011111	0.155556

## Sheet: 5K
	Full
Males	-0.14444	-0.11944	-0.13333	-0.01944	-0.00833	-0.05278	-0.03333	-0.01111	-0.02222	0.016667	0.005556	-0.01944	-0.1	-0.075	-0.08333	-0.06667	-0.01111	-0.04444	-0.13333	-0.08611	-0.02778	-0.11944	-0.05278	-0.01944	-0.07222	-0.03889	-0.01944	0.002778	0	0.005556	0.008333*	0*	-0.21944	-0.09444	-0.13889	0.016667	-0.15	-0.20556	-0.16944	-0.06389	-0.1	-0.125	-0.08611	-0.11111	-0.08889	-0.13611	0*	-0.05
Females	-0.05556	-0.04722	-0.03333	-0.05278	-0.11944	-0.12222	-0.13333	-0.08333	-0.03889	-0.02222	-0.04167	0	-0.01111	-0.00556	-0.04444	-0.01111	-0.00833	-0.18611	-0.075	0.016667	-0.01944	-0.08333	-0.11667	0	-0.1	-0.025	-0.00278	-0.05278	-0.025	-0.03333	-0.025	-0.00278	-0.00556
	Part
Males	-0.03056	-0.06667	-0.10278	-0.12778	-0.06389	-0.09444	-0.06667	0.166667	0.027778	0.030556*	0	-0.00278	-0.02778	0.013889	-0.03611	-0.06111	-0.08056	0.075	0.019444	-0.04444	0.091667	0.083333	0.016667	0.069444	0.058333	0.047222	0.038889	0.033333	-0.00278	-0.25278	-0.05	-0.1	-0.20556	-0.00556	-0.14722	-0.10833	-0.13056	-0.05556	-0.05556	-0.01111	-0.03333	-0.12222	-0.21667	-0.11111
Females	-0.06111	-0.08611	-0.02222	-0.00833	-0.06944	-0.03333	-0.11944	-0.03889	-0.08611	-0.03889	0.052778	0.052778	-0.06667	-0.01111	-0.06667	0	0.030556	0.005556	-0.01389	0.030556	-0.13333	0.061111	-0.11667	0.094444	0.011111	0.005556	-0.00556	-0.125	0.008333	-0.04722	0.019444	-0.01667	-0.01667	0.033333	-0.03889	0.025	0.027778	-0.00833	-0.01944	-0.00278	-0.03611	-0.1	0.025	-0.00278	-0.07222

## Sheet: 5L
	Full
Males	0.038889	0.066667	0.038889	0.016667	0.005556	0.038889	0.016667	0	0.05	0	0	0.027778	0.022222	0.011111	0.016667	0.011111	0	0.022222	0.011111	0.005556	0	0.038889	0	0.011111	0.027778	0.005556	0.011111	0	0.022222	0.038889	0*	0*	0.05	0.027778	0.038889	0.038889	0.15	0.105556	0.088889	0.016667	0.038889	0.033333	0.033333	0	0.022222	0.044445	0*	0.088889
Females	0.038889	0.072223	0.027778	0.094445	0.072222	0.027778	0.061111	0.022222	0.016667	0.005556	0.027778	0.083333	0.022222	0.011111	0.005556	0	0.011111	0	0.011111	0.016667	0.011111	0.005556	0.005556	0.005556	0	0.011111	0	0	0	0	0.005556	0.005556	0.005556
	Part
Males	0.077778	0.077778	0.116667	0.1	0.088889	0.05	0.033334	0.027778	0.088889	0.022222*	0.016667	0.011111	0.044444	0	0.005556	0.027778	0.027778	0.05	0.005556	0.005556	0.077778	0.038889	0.033333	0.027778	0.033333	0.022222	0.044444	0.027778	0.027778	0.055556	0.022222	0.011111	0.05	0.088889	0.038889	0.144445	0.022222	0	0.005556	0	0.011111	0.011111	0.038889	0.027778
Females	0.011111	0.011111	0.005556	0.005556	0.022222	0	0.016667	0.038889	0.011111	0	0.066667	0.138889	0.088889	0.016667	0.066667	0.044444	0.011111	0.016667	0.005556	0.016667	0.027778	0.016667	0	0.072222	0.088889	0.022222	0.1	0.022222	0.072222	0.022222	0.022222	0.05	0.005556	0	0.038889	0.011111	0.022222	0.005556	0.005556	0.027778	0.011111	0.022222	0.044445	0.011111	0.094445

[truncated: 2 more sheets: 5M, 5N]
