# Supplementary material for: Sex differences in BNST signaling and BNST CRF in fear processing
Source: eLife. 2025 Dec 5;12:RP89189. doi: 10.7554/eLife.89189 (PMC12680374; doi:10.7554/eLife.89189)
Supplement: Figure 6—source data 1. [file elife-89189-fig6-data1.xlsx]

## Sheet: 6E
	Tone 3
Males	0	0.266667	0.333333	0	0.233333	0.3	0	0*	0*	0	0.033333	0	0	0	0	0	0.166667	0.066667	0	0	0	0	0	0	0.033333	0.066667	0.1	0	0*	0*	0	0	0.1	0	0.033333	0	0.033333	0	0	0.033333	0	0	0.033333	0.058122
Females	0.033333	0.033333	0.033333	0.066667	0.066667	0.066667	0.1	0	0.033333	0	0*	0.1	0	0.2	0	0.033333	0	0.033333	0.2	0.166667	0.133333	0.266667	0.266667	0.1	0.1	0	0.1	0	0.066667	0	0	0	0*	0	0	0	0.1	0.2*	0*	0.1	0.033333	0.166667	0*	0	0.3	0	0.033333	0.066667	0.133333
	Tone 4
Males	0	0.033333	0.133333	0	0.033333	0.166667	0	0*	0*	0.066667	0	0	0	0	0.066667	0	0	0.2	0.066667	0.033333	0.133333	0.066667	0	0.033333	0	0	0	0	0*	0*	0	0.033333	0.133333	0	0.133333	0	0	0	0	0	0	0.033333	0.066667	0.04031
Females	0	0.066667	0	0	0	0.033333	0.033333	0	0	0	0*	0	0	0	0	0	0	0	0.033333	0.2	0	0.1	0.066667	0	0.033333	0	0.033333	0	0	0	0	0	0*	0	0.033333	0.066667	0	0.1*	0.033333*	0	0.066667	0.166667	0*	0	0.1	0	0	0	0
	Tone 5
Males	0	0.166667	0.366667	0.033333	0.166667	0.3	0	0*	0*	0.166667	0	0	0	0.033333	0.166667	0	0	0.033333	0	0	0	0	0	0	0	0.066667	0.033333	0.066667	0*	0*	0	0.033333	0.2	0	0.166667	0	0	0.033333	0	0	0	0.066667	0.033333	0.062989
Females	0	0.033333	0	0.033333	0	0.033333	0.066667	0	0	0	0*	0	0	0.066667	0	0	0	0	0.033333	0.2	0	0.1	0.066667	0	0	0	0	0	0	0	0	0	0*	0	0	0.033333	0	0.1*	0*	0	0.033333	0.033333	0*	0.033333	0.133333	0	0.033333	0.033333	0.033333
[truncated: 9 more columns]

## Sheet: 6F
	Shock 1
Males	0	0	0.2	0	0	0	0	0*	0*	0	0.1	0	0	0	0	0	0	0	0	0	0	0	0	0	0	0	0	0	0*	0*	0	0	0	0	0	0	0	0	0	0	0	0	0.1
Females	0	0	0	0	0	0	0.1	0	0	0.1	0.1*	0.1	0	0	0	0	0	0	0	0	0	0.1	0	0	0	0	0	0	0	0	0	0	0*	0	0	0	0.1	0.1*	0.1*	0.3	0	0	0.2*	0	0	0.1	0	0	0
	Shock 2
Males	0.1	0	0.1	0	0	0	0	0*	0*	0	0	0	0	0	0	0	0.1	0	0	0	0	0	0	0.2	0.7	0.2	0.1	0.1	0*	0*	0	0.2	0.2	0	0.1	0	0.1	0	0	0	0	0	0
Females	0	0	0	0	0	0	0.1	0	0	0	0*	0.2	0	0.1	0	0	0	0.1	0.1	0.1	0	0.1	0.2	0	0	0	0	0	0	0	0	0	0*	0	0	0.1	0.1	0.2*	0*	0	0.1	0.2	0*	0	0.1	0.2	0.1	0	0
	Shock 3
Males	0	0	0.1	0	0.1	0.1	0	0*	0.1*	0	0	0	0	0	0.1	0	0	0.1	0	0	0	0	0	0	0	0.1	0.1	0	0*	0.1*	0	0	0.3	0	0	0	0	0	0	0	0	0	0
Females	0	0	0	0	0	0	0	0	0	0	0.1*	0	0	0	0	0	0	0	0	0	0	0	0	0	0	0	0	0	0	0	0	0	0.1*	0	0	0	0	0*	0*	0.1	0.1	0.1	0*	0	0.2	0.1	0.1	0.1	0.1
[truncated: 9 more columns]

## Sheet: 6G
	Shock 1
Males	0.1	0.5	0.5	0	0.4	0	0	0*	0*	0	0	0	0	0	0	0	0.2	0	0	0	0	0	0	0	0	0.1	0	0.1	0*	0.1*	0	0	0	0	0.1	0	0.2	0.1	0	0	0	0.1	0.1
Females	0	0	0	0	0	0	0	0	0	0	0*	0.1	0	0.1	0	0	0	0	0	0	0	0	0	0	0	0	0	0	0	0	0	0	0*	0	0	0	0	0.1*	0*	0	0	0	0*	0	0.2	0	0.1	0.2	0.2
	Shock 2
Males	0	0.4	0.3	0	0.1	0.7	0	0*	0*	0.1	0.1	0	0	0.1	0	0	0	0.2	0	0	0	0	0	0	0	0.1	0	0	0*	0*	0	0	0.2	0	0.1	0	0	0	0	0	0	0	0
Females	0	0	0	0	0	0	0	0	0	0	0*	0	0	0	0	0	0	0	0	0.2	0	0.1	0	0	0	0	0.1	0	0	0	0	0	0*	0	0	0	0	0.1*	0*	0	0.1	0	0*	0	0.3	0	0	0.1	0
	Shock 3
Males	0	0.1	0.1	0	0.1	0.1	0	0*	0*	0.2	0	0	0.1	0.1	0	0	0.2	0	0	0	0	0	0	0	0	0.1	0	0.1	0*	0.1*	0	0.1	0.1	0	0.1	0	0	0	0	0	0	0.1	0
Females	0	0	0	0	0	0	0	0	0	0	0*	0	0	0	0	0	0	0	0	0.1	0	0	0	0	0	0	0	0	0.1	0	0	0	0*	0	0	0	0	0*	0*	0.1	0	0	0*	0.1	0.1	0	0	0.1	0
[truncated: 9 more columns]

## Sheet: 6H
	Shock 3
Males	0	0	0.1	0	0.1	0.1	0	0*	0.1*	0	0	0	0	0	0.1	0	0	0.1	0	0	0	0	0	0	0	0.1	0.1	0	0*	0.1*	0	0	0.3	0	0	0	0	0	0	0	0	0	0
Females	0	0	0	0	0	0	0	0	0	0	0.1*	0	0	0	0	0	0	0	0	0	0	0	0	0	0	0	0	0	0	0	0	0	0.1*	0	0	0	0	0*	0*	0.1	0.1	0.1	0*	0	0.2	0.1	0.1	0.1	0.1
	Omission 3
Males	0	0.1	0.1	0	0.1	0.1	0	0*	0*	0.2	0	0	0.1	0.1	0	0	0.2	0	0	0	0	0	0	0	0	0.1	0	0.1	0*	0.1*	0	0.1	0.1	0	0.1	0	0	0	0	0	0	0.1	0
Females	0	0	0	0	0	0	0	0	0	0	0*	0	0	0	0	0	0	0	0	0.1	0	0	0	0	0	0	0	0	0.1	0	0	0	0*	0	0	0	0	0*	0*	0.1	0	0	0*	0.1	0.1	0	0	0.1	0
[truncated: 9 more columns]

## Sheet: 6I
M				F
	shock	omission			shock	omission
-19.7842	-1.14639	-6.1402		-19.7842	1.94439	-2.24663
-19.5843	-0.896673	-6.30251		-19.5843	1.25287	-2.02322
-19.3845	-0.433465	-6.51046		-19.3845	1.24649	-2.52019
-19.1846	-0.606044	-6.51217		-19.1846	1.12829	-2.51252
-18.9848	-0.303371	-5.93092		-18.9848	0.967536	-2.90107
-18.785	-0.37554	-6.22188		-18.785	0.520904	-3.07798
-18.5851	-0.56137	-6.75746		-18.5851	0.470508	-3.08062
-18.3853	-0.341156	-6.63056		-18.3853	0.49436	-3.14538
-18.1854	-0.57333	-6.60765		-18.1854	0.174831	-3.51529
-17.9856	-0.553503	-6.86601		-17.9856	-0.0111034	-3.56806
-17.7858	-0.533992	-7.16314		-17.7858	0.11029	-3.63643
-17.5859	-0.772911	-6.58956		-17.5859	0.0652901	-3.75326
-17.3861	-0.558439	-6.54814		-17.3861	-0.0893525	-3.70083
-17.1862	-0.0893881	-6.3741		-17.1862	0.865397	-3.85667
-16.9864	0.126588	-6.88071		-16.9864	1.05717	-3.54971
-16.7866	-0.692873	-6.54696		-16.7866	0.736635	-3.88815
-16.5867	-0.365429	-6.70975		-16.5867	0.701757	-3.82971
-16.3869	-0.221529	-6.96566		-16.3869	0.42279	-3.92243
-16.187	-0.959659	-6.75786		-16.187	0.221969	-3.83457
-15.9872	-0.189613	-6.31141		-15.9872	0.0671544	-3.97786
-15.7874	-0.42866	-6.34955		-15.7874	0.0318433	-3.69344
-15.5875	-0.61775	-6.37731		-15.5875	0.113901	-3.62684
-15.3877	-0.506102	-6.72917		-15.3877	0.140541	-3.471
-15.1878	-0.363339	-6.23636		-15.1878	0.660968	-4.11955
-14.988	-0.231773	-6.61092		-14.988	0.600961	-3.78941
-14.7882	0.0768423	-6.14012		-14.7882	0.346794	-3.41159
-14.5883	0.936884	-5.3705		-14.5883	0.257485	-4.05016
-14.3885	2.81778	-6.73014		-14.3885	0.0953364	-4.07142
-14.1886	2.20131	-6.49843		-14.1886	0.154815	-4.30601
-13.9888	1.57632	-6.52858		-13.9888	0.0519799	-4.28928
-13.789	1.9592	-6.33323		-13.789	-0.317439	-3.88387
-13.5891	0.416273	-6.01898		-13.5891	-0.307467	-4.2571
-13.3893	0.414948	-6.12645		-13.3893	-0.403849	-4.3207
-13.1894	-0.26745	-5.89232		-13.1894	-0.208072	-4.04804
-12.9896	-0.0981374	-6.52341		-12.9896	-0.326786	-4.02495
-12.7898	-0.324034	-6.53548		-12.7898	-0.489117	-4.10636
-12.5899	-0.447006	-6.35609		-12.5899	-0.372618	-4.55616
-12.3901	0.254703	-6.77407		-12.3901	-0.469243	-4.25985
-12.1902	-0.217139	-7.25121		-12.1902	-0.375546	-3.90033
-11.9904	-0.34856	-6.9708		-11.9904	0.482945	-4.0702
-11.7906	-0.441758	-6.54063		-11.7906	1.23394	-4.05773
-11.5907	0.229553	-6.40727		-11.5907	1.0251	-3.83299
-11.3909	1.72425	-6.19156		-11.3909	0.478422	-3.66982
-11.191	2.77388	-7.35764		-11.191	0.386676	-3.74639
-10.9912	0.0758932	-6.42562		-10.9912	0.42974	-3.78826
-10.7914	0.820229	-6.15743		-10.7914	0.389198	-4.00523
-10.5915	3.50243	-5.36012		-10.5915	0.209182	-3.24142
-10.3917	2.85603	-5.97618		-10.3917	-0.0803866	-2.39557
-10.1918	1.30041	-5.95122		-10.1918	0.0515509	-2.4586
-9.992	0.274159	-6.79425		-9.992	-0.243959	-2.85457
-9.79216	0.691664	-6.2905		-9.79216	-0.043131	-2.4369
-9.59232	0.253239	-6.57873		-9.59232	0.385145	-2.99944
-9.39248	0.939147	-6.04746		-9.39248	0.67164	-2.6933
-9.19264	0.652863	-6.19755		-9.19264	-0.0978544	-0.62915
-8.9928	0.402597	-6.63308		-8.9928	-0.178213	-1.17674
-8.79296	-0.389295	-6.83251		-8.79296	-0.0567449	-1.31869
-8.59312	-0.390338	-7.23774		-8.59312	-0.347339	-1.96375
-8.39328	-0.0761087	-6.47332		-8.39328	-0.261146	-2.3842
-8.19344	0.179787	-6.10454		-8.19344	-0.372169	-2.34006
-7.9936	-0.29337	-6.74023		-7.9936	-0.258523	-2.48103
-7.79376	-0.705485	-6.85037		-7.79376	-0.554741	-2.8346
-7.59392	2.01246	-6.35454		-7.59392	-0.752079	-2.05555
-7.39408	2.30942	-7.19518		-7.39408	-0.85072	-1.88583
-7.19424	1.46915	-6.58902		-7.19424	-0.69155	-2.06355
-6.9944	1.22808	-6.34599		-6.9944	-0.970736	-2.64558
-6.79456	0.327796	-6.9643		-6.79456	-0.820435	-2.51273
-6.59472	0.269285	-6.76602		-6.59472	-0.9425	-2.62047
-6.39488	0.285576	-6.1328		-6.39488	-1.32264	-2.81977
-6.19504	-0.124654	-7.31907		-6.19504	-0.991365	-2.92329
-5.9952	0.157302	-6.50164		-5.9952	-0.937556	-3.01155
-5.79536	-0.141279	-6.26804		-5.79536	-0.947056	-2.93823
-5.59552	-0.0430412	-6.44209		-5.59552	-0.996385	-3.04613
-5.39568	-0.255882	-6.61561		-5.39568	-1.034	-3.10911
-5.19584	-0.604619	-6.62621		-5.19584	-0.502518	-1.82343
-4.996	-0.0456558	-6.9202		-4.996	-0.690271	-1.73583
-4.79616	0.0407133	-6.92121		-4.79616	-0.683246	-1.55914
-4.59632	-0.0499337	-6.84436		-4.59632	-0.783954	-1.9016
-4.39648	-0.331266	-6.54719		-4.39648	-0.556339	-2.5523
-4.19664	-0.247596	-6.22611		-4.19664	-0.950295	-2.83035
-3.9968	4.10965	-5.43074		-3.9968	-0.608827	-2.81407
-3.79696	2.8931	-6.16836		-3.79696	-0.534292	-2.68072
-3.59712	1.69921	-5.57058		-3.59712	-0.463886	-2.97861
-3.39728	1.61067	-6.15455		-3.39728	-0.849005	-2.99914
-3.19744	0.721168	-5.94245		-3.19744	-0.736726	-3.11504
-2.9976	0.648484	-6.48895		-2.9976	-0.655266	-3.42528
-2.79776	0.659203	-7.05871		-2.79776	-0.856782	-3.60347
-2.59792	0.284656	-6.59914		-2.59792	0.182559	-3.4717
-2.39808	-0.493917	-6.6742		-2.39808	0.311677	-3.10777
-2.19824	-0.306075	-6.54279		-2.19824	0.120961	-3.5291
-1.9984	0.0866753	-6.46562		-1.9984	-0.154379	-3.14232
-1.79856	-0.482852	-4.41628		-1.79856	-0.0989463	-3.5886
-1.59872	-0.891778	-3.24349		-1.59872	-0.446903	-3.4423
-1.39888	-1.03243	-4.83831		-1.39888	-0.365779	-3.48313
-1.19904	-0.718391	-5.06839		-1.19904	-0.607654	-3.64455
-0.9992	-0.317407	-5.48799		-0.9992	-0.75084	-3.20939
-0.79936	-0.115636	-5.54767		-0.79936	-0.253903	-3.51404
-0.59952	-0.351725	-5.98492		-0.59952	-0.605987	-3.4922
-0.39968	-0.307701	-5.70665		-0.39968	-0.497659	-3.56137
-0.19984	-0.0587709	-5.66197		-0.19984	-0.849144	-3.63182
3.55271e-15	-0.367014	-4.89617		3.55271e-15	-0.81298	-3.54242
0.19984	1.9778	-5.04196		0.19984	-0.74764	-3.55152
0.39968	3.45505	-5.09849		0.39968	-0.895281	-3.64038
0.59952	2.45158	-5.97001		0.59952	-0.409579	-3.4474
0.79936	2.34241	-5.06308		0.79936	-0.601889	-3.41361
0.9992	0.94265	-6.27767		0.9992	-1.07204	-3.69666
1.19904	0.675786	-6.354		1.19904	-0.74803	-3.15017
1.39888	0.227851	-5.36313		1.39888	-0.829864	-2.68637
1.59872	0.096287	-5.72951		1.59872	-1.02579	-2.95019
1.79856	-0.249767	-5.23283		1.79856	-0.763937	-3.10079
1.9984	-0.297383	-4.91221		1.9984	-1.04903	-3.05457
2.19824	0.267302	-6.0348		2.19824	-0.841052	-2.6015
2.39808	-0.0578676	-6.16157		2.39808	-0.783204	-2.94385
2.59792	-0.535761	-6.34023		2.59792	-0.872038	-2.99612
2.79776	-0.0989423	-6.89181		2.79776	-1.10245	-3.49146
2.9976	0.286485	-6.39033		2.9976	-0.83596	-3.25891
3.19744	-0.724869	-6.40252		3.19744	-0.988664	-3.26088
3.39728	-0.428596	-6.68221		3.39728	-0.87663	-3.21644
3.59712	-0.262397	-6.64257		3.59712	-0.800985	-3.69423
3.79696	-0.675014	-7.00153		3.79696	-0.925197	-3.39803
3.9968	-0.361569	-6.486		3.9968	-0.834522	-3.34233
4.19664	3.29557	-6.47517		4.19664	-0.596351	-3.60334
4.39648	2.73511	-6.61567		4.39648	-0.462493	-3.75526
4.59632	2.45803	-6.29029		4.59632	-0.904304	-3.54983
4.79616	1.13811	-6.37626		4.79616	-0.671013	-3.38096
4.996	0.879408	-6.19101		4.996	-0.948757	-3.68048
5.19584	0.437285	-6.42507		5.19584	-0.745372	-3.71567
5.39568	0.423699	-6.71025		5.39568	-1.00694	-3.6253
5.59552	0.293208	-6.32852		5.59552	-0.464409	-4.16707
5.79536	-0.143147	-5.9545		5.79536	-0.457993	-3.90366
5.9952	-0.271081	-3.88535		5.9952	-0.388312	-4.06567
6.19504	-0.12888	-2.3316		6.19504	-0.329731	-3.83015
6.39488	-1.30744	-3.49794		6.39488	-0.743097	-3.60351
6.59472	-0.25928	-3.84132		6.59472	-0.72972	-4.16042
6.79456	0.178073	-1.72531		6.79456	-0.575768	-3.92422
6.9944	0.299125	-2.70487		6.9944	-0.980651	-3.81903
7.19424	0.115343	-1.94499		7.19424	-0.717343	-3.6056
7.39408	2.64617	-3.97412		7.39408	-0.81497	-3.24416
7.59392	1.82817	-1.91726		7.59392	-0.750921	-3.54237
7.79376	1.30678	-0.73972		7.79376	-0.669254	-3.80775
7.9936	1.1231	-2.79638		7.9936	-0.601327	-3.52386
8.19344	0.207403	-3.52039		8.19344	-0.626679	-3.53863
8.39328	-0.111255	-4.77626		8.39328	-1.21974	-3.45753
8.59312	-0.0480062	-4.87694		8.59312	-1.30417	-3.85427
8.79296	-0.360343	-5.66326		8.79296	-0.867062	-3.59873
8.9928	-0.661348	-5.60161		8.9928	-0.786184	-3.55809
9.19264	-1.36494	-5.69044		9.19264	-0.595194	-3.84705
9.39248	4.45629	-6.04669		9.39248	-0.779903	-3.83088
9.59232	4.07236	-6.35327		9.59232	-1.076	-3.88996
9.79216	5.35062	-5.99914		9.79216	-0.974213	-3.82812
9.992	3.9106	-6.03679		9.992	-0.741489	-3.77505
10.1918	2.94125	-7.2457		10.1918	-0.734764	-4.07585
10.3917	1.88837	-5.92885		10.3917	-1.01048	-4.14501
10.5915	1.56795	-3.32735		10.5915	-1.27271	-3.72691
10.7914	0.326539	-3.59308		10.7914	-0.999255	-4.02817
10.9912	0.335039	-4.70242		10.9912	-1.22054	-3.73783
11.191	-0.39747	-4.80655		11.191	-0.995307	-3.85158
11.3909	0.275389	-5.45949		11.3909	-0.751315	-3.95604
11.5907	-0.0451289	-5.81702		11.5907	-1.04532	-4.16434
11.7906	0.11675	-5.45946		11.7906	-1.19858	-4.08571
11.9904	0.110181	-4.89879		11.9904	-0.923531	-3.63509
12.1902	-0.205265	-5.96111		12.1902	-0.956814	-3.72953
12.3901	-0.292542	-6.38859		12.3901	-1.02743	-3.53187
12.5899	-0.532454	-5.51736		12.5899	-1.12358	-2.85076
12.7898	2.27543	-5.96808		12.7898	-1.04886	-2.61513
12.9896	1.67138	-5.6744		12.9896	-1.05861	-2.84156
13.1894	1.3689	-5.84978		13.1894	-0.904292	-3.28108
13.3893	0.40809	-5.85351		13.3893	-0.988876	-3.20402
13.5891	0.60916	-6.31876		13.5891	-1.03152	-3.42051
13.789	0.365612	-6.43395		13.789	-1.01004	-3.32034
13.9888	1.78819	-6.43943		13.9888	-1.14172	-3.41049
14.1886	1.60673	-6.25839		14.1886	-1.19156	-3.40812
14.3885	1.25955	-6.4433		14.3885	-1.20128	-3.83242
14.5883	0.869844	-6.47822		14.5883	-0.928156	-3.31513
14.7882	0.776821	-6.2735		14.7882	-1.13379	-3.70748
14.988	-0.318323	-6.61813		14.988	-1.09966	-3.69605
15.1878	-0.113506	-4.91309		15.1878	-1.19106	-3.60246
15.3877	0.158335	-5.69299		15.3877	-0.537017	-3.56279
15.5875	0.0931801	-5.64957		15.5875	-1.16488	-3.69125
15.7874	-0.311328	-6.19652		15.7874	-0.980452	-3.5785
15.9872	-0.475852	-5.69808		15.9872	-1.46197	-3.31719
16.187	-0.221027	-6.71544		16.187	-1.45028	-3.33434
16.3869	0.377909	-6.56727		16.3869	-1.06761	-3.5383
16.5867	-0.108503	-6.24033		16.5867	-1.08591	-3.50038
16.7866	0.232217	-6.33006		16.7866	-0.807226	-3.43765
16.9864	-0.321863	-6.49579		16.9864	-1.21298	-3.76129
17.1862	-0.591971	-6.5907		17.1862	-1.34243	-3.75725
17.3861	-0.636311	-5.97136		17.3861	-1.38591	-3.8199
17.5859	-0.135714	-7.05459		17.5859	-1.14651	-3.62089
17.7858	0.555102	-4.45081		17.7858	-1.1824	-3.90713
17.9856	0.624474	-4.67761		17.9856	-0.918722	-3.7296
18.1854	0.919765	-5.17705		18.1854	-1.22875	-3.72968
18.3853	0.302152	-5.35773		18.3853	-1.25118	-3.57267
18.5851	0.3781	-5.77598		18.5851	-1.08814	-3.73585
18.785	0.254114	-5.42782		18.785	-1.18825	-3.83266
18.9848	-0.118248	-5.51756		18.9848	-1.10781	-3.47294
19.1846	-1.12696	-5.32419		19.1846	-0.894112	-3.82218
19.3845	-0.5374	-6.24869		19.3845	-1.08523	-3.85052
19.5843	-0.00798738	-6.03417		19.5843	-1.01057	-3.40097
19.7842	-1.12152	-5.84213		19.7842	-1.07803	-3.5265
19.984	-0.456514	-6.12604		19.984	-0.975985	-3.79853
20.1838	-0.553289	-5.90772		20.1838	-1.39317	-3.84878
20.3837	-0.423273	-6.29775		20.3837	-1.11905	-3.86276
20.5835	-1.49126	-6.21317		20.5835	-0.989099	-4.05098
20.7834	-0.549429	-6.37374		20.7834	-1.39275	-4.06209
20.9832	-0.473656	-6.5457		20.9832	-1.07511	-4.05286
21.183	3.39061	-6.33568		21.183	-0.600658	-2.53154
21.3829	4.30219	-6.40388		21.3829	-0.619623	-2.21023
21.5827	3.89699	-6.35931		21.5827	-0.524911	-2.64912
21.7826	1.85782	-6.33143		21.7826	-0.746094	-2.82932
21.9824	1.30077	-6.95246		21.9824	-0.987408	-2.88335
22.1822	0.869044	-7.14201		22.1822	-0.901298	-3.0588
22.3821	0.791999	-6.67891		22.3821	-0.805875	-3.04709
22.5819	0.174507	-6.08067		22.5819	-1.25951	-3.18921
22.7818	0.322748	-6.21803		22.7818	-0.980909	-3.62185
22.9816	0.385809	-5.12577		22.9816	-0.99592	-3.62127
23.1814	0.0413913	-3.75446		23.1814	-1.013	-3.50942
23.3813	0.0185774	-4.07514		23.3813	-0.794339	-3.63804
23.5811	-0.0753194	-4.65348		23.5811	-0.814703	-3.58402
23.781	0.391182	-5.70457		23.781	-0.827961	-3.27235
23.9808	-0.437627	-5.56862		23.9808	-1.15093	-3.46674
24.1806	0.0841302	-5.80195		24.1806	-1.22265	-3.71239
24.3805	0.115369	-5.9421		24.3805	-1.08168	-3.9247
24.5803	0.16696	-4.46927		24.5803	-1.29626	-3.59211
24.7802	-0.400665	-2.1805		24.7802	-0.0623498	-3.49317
24.98	-0.760139	-3.18702		24.98	1.46459	-3.81702
25.1798	-0.511442	-3.90759		25.1798	1.11672	-3.82431
25.3797	-0.193253	-5.1076		25.3797	0.916839	-3.84764
25.5795	-0.634911	-5.47962		25.5795	0.478695	-3.68171
25.7794	-0.802974	-5.67183		25.7794	0.463607	-3.66313
25.9792	-0.255297	-6.19837		25.9792	0.181895	-3.67575
26.179	0.0488111	-6.02966		26.179	0.0838218	-3.6827
26.3789	-0.762029	-6.33388		26.3789	0.0503464	-3.72067
26.5787	0.647482	-6.76991		26.5787	-0.0213832	-3.89687
26.7786	4.09301	-6.26063		26.7786	-0.205649	-4.02057
26.9784	1.86229	-6.9754		26.9784	-0.267831	-3.95922
27.1782	0.873535	-6.50486		27.1782	-0.241722	-4.29056
27.3781	0.971459	-6.66259		27.3781	-0.62318	-2.60782
27.5779	0.193427	-6.3118		27.5779	-0.694018	-1.79193
27.7778	0.36648	-6.94675		27.7778	-0.616816	-2.0132
27.9776	-0.309394	-6.87299		27.9776	-0.455889	-2.61246
28.1774	-0.9879	-6.9653		28.1774	-0.538246	-3.25299
28.3773	-1.3999	-4.87121		28.3773	0.0730255	-3.2747
28.5771	-0.134476	-3.32892		28.5771	0.0287352	-3.30578
28.777	-0.883453	-4.00079		28.777	0.250603	-3.34699
28.9768	-0.920318	-4.69681		28.9768	0.193749	-3.70035
29.1766	-0.298202	-5.32498		29.1766	0.388917	-3.53142
29.3765	-0.229228	-5.68115		29.3765	0.112843	-3.76649
29.5763	-0.485284	-2.55283		29.5763	-0.192813	-3.81575
29.7762	-0.548495	-3.57954		29.7762	0.104508	-3.88113
29.976	-1.23756	-4.26945		29.976	1.44502	-3.94434
30.1758	-0.275996	-5.40211		30.1758	0.753372	-4.14555
30.3757	-0.705613	-5.17174		30.3757	0.976778	-3.91389
30.5755	-0.847789	-5.92628		30.5755	0.479814	-3.89761
30.7754	-0.580231	-6.06209		30.7754	0.487477	-3.93543
30.9752	-0.63374	-5.94524		30.9752	0.098933	-3.74962
31.175	-0.844076	-6.13736		31.175	-0.0779845	-3.90439
31.3749	-0.887161	-2.7646		31.3749	-0.0806229	-3.96893
31.5747	-0.579208	-2.45937		31.5747	-0.145376	-3.61333
31.7746	-0.451427	-3.92393		31.7746	-0.515293	-3.41245
31.9744	-0.254897	-4.67364		31.9744	-0.568061	-3.3816
32.1742	-0.957109	-4.92765		32.1742	-0.636431	-3.14819
32.3741	-1.42747	-4.6688		32.3741	-0.753263	-3.63998
32.5739	-0.459782	-5.40524		32.5739	-0.700825	-3.81245
32.7738	-0.648443	-5.70882		32.7738	-0.856672	-3.49643
32.9736	-0.714469	-5.77018		32.9736	-0.549715	-3.84365
33.1734	-0.791147	-5.73533		33.1734	-0.888146	-4.05485
33.3733	-1.01866	-5.96464		33.3733	-0.829712	-3.881
33.5731	-1.2073	-6.50944		33.5731	-0.922429	-4.01332
33.773	-1.08	-6.50214		33.773	-0.834565	-4.24275
33.9728	-0.931227	-6.22558		33.9728	-0.97786	-3.96092
34.1726	-1.19307	-5.19334		34.1726	-0.693439	-4.02055
34.3725	-0.824732	-2.0755		34.3725	-0.626843	-3.93494
34.5723	-0.654649	-3.48795		34.5723	-0.471001	-4.22282
34.7722	-0.409609	-3.9384		34.7722	-1.11955	-4.00618
34.972	-0.551699	-4.44918		34.972	-0.789406	-4.02126
35.1718	-0.78262	-1.45223		35.1718	-0.411589	-3.8602
35.3717	-0.895512	-2.45584		35.3717	-1.05016	-4.15063
35.5715	-0.552077	-3.61692		35.5715	-1.07142	-3.82141
35.7714	-1.95054	-4.28227		35.7714	-1.30601	-3.84491
35.9712	-0.305193	-5.09967		35.9712	-1.28928	-3.60932
36.171	-0.215645	-5.68254		36.171	-0.88387	-4.12299
36.3709	-2.04327	-6.12311		36.3709	-1.2571	-4.18783
36.5707	-0.286332	-6.16718		36.5707	-1.3207	-3.80457
36.7706	0.035637	-5.73724		36.7706	-1.04804	-4.12288
36.9704	0.795109	-6.50272		36.9704	-1.02495	-4.00158
37.1702	1.35489	-7.05155		37.1702	-1.10636	-3.73633
37.3701	0.535565	-6.542		37.3701	-1.55616	-4.25955
37.5699	-0.176216	-3.96152		37.5699	-1.25985	-3.93388
37.7698	0.577247	-2.63392		37.7698	-0.900331	-4.20776
37.9696	-0.140911	-3.87339		37.9696	-1.0702	-3.91825
38.1694	2.4325	-4.6072		38.1694	-1.05773	-3.90541
38.3693	2.24461	-4.51479		38.3693	-0.83299	-3.8017
38.5691	1.06017	-5.21066		38.5691	-0.669823	-3.84491
38.769	1.25148	-5.90762		38.769	-0.74639	-3.57858
38.9688	0.46485	-5.62679		38.9688	-0.788262	-3.9026
39.1686	0.5144	-6.44687		39.1686	-1.00523	-4.10611
39.3685	-0.333648	-5.95971		39.3685	-0.241423	-4.23293
39.5683	-0.0775414	-6.04992		39.5683	0.604431	-3.70465
39.7682	-0.145505	-5.96937		39.7682	0.541397	-3.88724
39.968	0.0498329	-6.31055		39.968	0.145433	-3.73834
40.1678	-0.35545	-6.06855		40.1678	0.563098	-3.73386
40.3677	-0.532581	-6.89715		40.3677	0.000555216	-3.52926
40.5675	-0.531646	-6.56985		40.5675	0.306703	-3.99838
40.7674	-0.489348	-6.32589		40.7674	2.37085	-3.93799
40.9672	-0.252641	-6.92897		40.9672	1.82326	-4.14648
41.167	-0.209549	-5.98694		41.167	1.68131	-3.98503
41.3669	-1.18186	-6.12394		41.3669	1.03625	-3.56236
41.5667	-0.745946	-5.79727		41.5667	0.6158	-3.95494
41.7666	-0.577205	-5.78869		41.7666	0.659938	-3.7786
41.9664	-0.510589	-6.1955		41.9664	0.518972	-4.01935
42.1662	-0.637953	-6.04922		42.1662	0.165404	-3.83047
42.3661	-0.717224	-6.48046		42.3661	0.944455	-3.86554
42.5659	0.101537	-5.47223		42.5659	1.11417	-4.04921
42.7658	-0.733341	-5.99142		42.7658	0.936451	-3.93646
42.9656	-0.237743	-6.44211		42.9656	0.354421	-3.77615
43.1654	-0.224673	-6.02415		43.1654	0.487272	-3.72288
43.3653	-0.335015	-6.40465		43.3653	0.379532	-4.24677
43.5651	0.0773257	-6.34819		43.5651	0.180231	-4.03975
43.765	-0.444144	-6.55815		43.765	0.076713	-3.5529
43.9648	0.010288	-6.6878		43.9648	-0.0115494	-4.08981
44.1646	-0.11736	-4.81772		44.1646	0.0617713	-3.51662
44.3645	-1.04434	-3.52482		44.3645	-0.0461281	-3.3248
44.5643	-0.471209	-3.94683		44.5643	-0.109106	-3.27838
44.7642	-0.532315	-4.51911		44.7642	1.17657	-3.33608
44.964	-1.78552	-5.29154		44.964	1.26417	-3.65287
45.1638	0.960353	-5.71885		45.1638	1.44086	-3.62745
45.3637	-0.685105	-5.67882		45.3637	1.0984	-3.83644
45.5635	-0.843955	-5.82226		45.5635	0.447702	-3.7235
45.7634	-0.188871	-5.93132		45.7634	0.169647	-3.49073
45.9632	-0.417502	-5.69108		45.9632	0.185935	-3.69546
46.163	-0.217006	-5.38317		46.163	0.319283	-3.71225
46.3629	-0.101831	-6.15259		46.3629	0.0213929	-3.55427
46.5627	-0.472643	-5.76538		46.5627	0.000858902	-3.95487
46.7626	-0.761436	-6.00288		46.7626	-0.115035	-3.6207
46.9624	-0.769892	-5.52186		46.9624	-0.425275	-3.97526
47.1622	-0.690272	-6.26249		47.1622	-0.603475	-4.04316
47.3621	-0.208261	-5.95736		47.3621	-0.471703	-4.00692
47.5619	-0.695168	-6.39363		47.5619	-0.107767	-3.60661
47.7618	-0.229601	-6.75709		47.7618	-0.529103	-3.96258
47.9616	-0.398162	-6.49043		47.9616	-0.142321	-4.07151
48.1614	-0.169342	-7.06639		48.1614	-0.5886	-3.89949
48.3613	-0.593303	-6.33593		48.3613	-0.442304	-4.04848
48.5611	-0.5262	-6.66644		48.5611	-0.483126	-3.96638
48.761	-0.544734	-6.19824		48.761	-0.644547	-4.0975
48.9608	-0.867883	-6.98477		48.9608	-0.209388	-4.15913
49.1606	-0.475736	-6.14604		49.1606	-0.514043	-3.91091
49.3605	0.71569	-6.09158		49.3605	-0.492205	-4.00272
49.5603	0.0566142	-5.22652		49.5603	-0.561372	-3.45481
49.7602	0.0808693	-5.84157		49.7602	-0.631817	-3.87541
49.96	0.312829	-6.07174		49.96
		-3.68717
